# Supplementary material for: Comparative single-cell profiling reveals distinct cardiac resident macrophages essential for zebrafish heart regeneration
Source: eLife. 2023 Jul 27;12:e84679. doi: 10.7554/eLife.84679 (PMC10411971; doi:10.7554/eLife.84679)
Supplement: Figure 1—source data 1. [file elife-84679-fig1-data1.xlsx]

## Sheet: heatmap of DEGs
original order	Gene id	Gene name	H-cluster	WT	PBS7d	PBS21d	CL7d	CL21d	PBS7-CL7	PBS21-CL21
2526	ENSDARG00000089372	clk4a	9	-0.57	1.32	0.61	-1.24	-0.12	2.56	0.73
2525	ENSDARG00000113087	BX569796.1	9	-0.48	1.06	0.53	-1.49	0.37	2.55	0.16
2727	ENSDARG00000026655	tspo	13	0.37	1.55	-0.63	-0.98	-0.32	2.53	-0.31
818	ENSDARG00000017794	sdr16c5b	2	-0.82	1.62	0.01	-0.84	0.04	2.46	-0.03
2779	ENSDARG00000105382	hist1h4l	15	0.53	1.38	0	-0.96	-0.95	2.34	0.95
2728	ENSDARG00000095968	erlin2	13	0.64	0.68	-0.38	-1.6	0.66	2.28	-1.04
816	ENSDARG00000057437	apodb	2	-1.04	1.49	0.39	-0.72	-0.12	2.21	0.51
887	ENSDARG00000052336	ociad2	2	-0.49	1.79	-0.41	-0.41	-0.47	2.2	0.06
819	ENSDARG00000105428	si:zfos-1837d3.1	2	-1.11	1.29	0.53	-0.89	0.18	2.18	0.35
4477	ENSDARG00000104066	dnaja2a	21	1	0.55	0.23	-1.62	-0.17	2.17	0.4
834	ENSDARG00000037403	si:dkey-4p15.3	2	-0.86	1.72	-0.07	-0.44	-0.34	2.16	0.27
886	ENSDARG00000099606	clca5.1	2	-0.39	1.78	-0.46	-0.38	-0.55	2.16	0.09
2527	ENSDARG00000086842	dap1b	9	-0.12	0.57	1.05	-1.59	0.09	2.16	0.96
4476	ENSDARG00000110291	CABZ01044731.1	21	1.03	0.58	0.26	-1.56	-0.3	2.14	0.56
875	ENSDARG00000059826	crtac1a	2	-0.74	1.75	-0.47	-0.38	-0.15	2.13	-0.32
833	ENSDARG00000060345	apoda.1	2	-0.99	1.65	0.1	-0.47	-0.29	2.12	0.39
817	ENSDARG00000077239	si:ch211-165i18.2	2	-1.11	1.57	0.08	-0.54	0.01	2.11	0.07
890	ENSDARG00000069327	nkx3.3	2	-0.51	1.78	-0.58	-0.33	-0.36	2.11	-0.22
876	ENSDARG00000033345	cntln	2	-0.99	1.61	-0.38	-0.48	0.24	2.09	-0.62
888	ENSDARG00000034610	insb	2	-0.5	1.78	-0.5	-0.3	-0.5	2.08	0
2776	ENSDARG00000019081	DHDH	15	-0.15	1.5	0.34	-0.56	-1.13	2.06	1.47
2792	ENSDARG00000104801	tubb6	15	0.67	1.36	-0.26	-0.7	-1.07	2.06	0.81
884	ENSDARG00000039117	tefa	2	-0.69	1.68	-0.74	-0.36	0.11	2.04	-0.85
878	ENSDARG00000041140	ddb2	2	-0.78	1.58	-0.75	-0.44	0.39	2.02	-1.14
1184	ENSDARG00000100520	si:dkey-25o1.7	3	-0.72	1.3	-0.72	-0.72	0.86	2.02	-1.58
2731	ENSDARG00000092305	poldip2	13	1.09	0.45	-0.24	-1.57	0.27	2.02	-0.51
877	ENSDARG00000095774	emd	2	-1.03	1.64	-0.33	-0.37	0.1	2.01	-0.43
889	ENSDARG00000099741	mvb12a	2	-0.37	1.75	-0.78	-0.26	-0.33	2.01	-0.45
829	ENSDARG00000089705	abcf3	2	-0.84	1.7	-0.01	-0.3	-0.56	2	0.55
828	ENSDARG00000007708	nsa2	2	-0.89	1.45	0.63	-0.54	-0.64	1.99	1.27
895	ENSDARG00000095732	znf423	2	-0.84	1.74	-0.26	-0.24	-0.4	1.98	0.14
812	ENSDARG00000111107	CT009620.1	2	-1.18	1.37	0.59	-0.59	-0.19	1.96	0.78
2777	ENSDARG00000019231	sptan1	15	-0.29	1.27	0.8	-0.67	-1.11	1.94	1.91
892	ENSDARG00000053554	wdr76	2	-0.49	1.76	-0.65	-0.17	-0.46	1.93	-0.19
891	ENSDARG00000053498	ednrbb	2	-0.4	1.76	-0.6	-0.16	-0.6	1.92	0
2482	ENSDARG00000041619	rack1	9	-1.03	1.06	1.02	-0.86	-0.18	1.92	1.2
2520	ENSDARG00000006316	rpl23a	9	-0.56	0.76	1.29	-1.16	-0.33	1.92	1.62
2524	ENSDARG00000018637	sec61g	9	-0.28	0.84	1.24	-1.08	-0.71	1.92	1.95
2730	ENSDARG00000075454	hdc	13	1.11	0.4	-0.37	-1.52	0.38	1.92	-0.75
831	ENSDARG00000113257	FO704821.1	2	-0.89	1.66	0.09	-0.25	-0.61	1.91	0.7
873	ENSDARG00000102758	FO704661.1	2	-0.84	1.69	-0.64	-0.22	0.01	1.91	-0.65
874	ENSDARG00000097344	CR387932.1	2	-0.89	1.68	-0.59	-0.23	0.03	1.91	-0.62
4478	ENSDARG00000040707	chchd4b	21	1.24	0.45	0.13	-1.46	-0.35	1.91	0.48
3531	ENSDARG00000004189	cbx1a	19	0.8	0.43	0.82	-1.47	-0.59	1.9	1.41
1185	ENSDARG00000116672	CABZ01001434.2	3	-0.85	1.24	-0.67	-0.65	0.94	1.89	-1.61
359	ENSDARG00000057026	ran	1	-1.02	1.68	-0.28	-0.21	-0.17	1.89	-0.11
830	ENSDARG00000037262	cdkn2a/b	2	-0.95	1.63	0.17	-0.26	-0.59	1.89	0.76
832	ENSDARG00000071670	tma7	2	-0.81	1.64	0.16	-0.25	-0.75	1.89	0.91
883	ENSDARG00000019498	cry5	2	-0.68	1.63	-0.88	-0.26	0.19	1.89	-1.07
2490	ENSDARG00000088030	rpl35a	9	-0.84	0.71	1.17	-1.18	0.15	1.89	1.02
2521	ENSDARG00000115271	RPL37A	9	-0.29	0.68	1.32	-1.2	-0.51	1.88	1.83
4404	ENSDARG00000055524	rnf7	21	0.51	0.14	0.8	-1.73	0.28	1.87	0.52
4403	ENSDARG00000056167	hspe1	21	0.65	0.11	0.4	-1.75	0.59	1.86	-0.19
1187	ENSDARG00000088423	si:ch211-66k16.28	3	-0.97	1.21	-0.53	-0.65	0.95	1.86	-1.48
820	ENSDARG00000006456	pdgfrl	2	-1.06	1.49	0.47	-0.34	-0.57	1.83	1.04
1186	ENSDARG00000090267	CU062628.1	3	-0.93	1.1	-0.51	-0.73	1.07	1.83	-1.58
811	ENSDARG00000075161	defbl1	2	-1.25	1.35	0.59	-0.46	-0.22	1.81	0.81
2523	ENSDARG00000091211	adh8a	9	-0.69	0.9	1.26	-0.91	-0.56	1.81	1.82
2729	ENSDARG00000100938	hint2	13	1.19	0.45	-0.64	-1.36	0.35	1.81	-0.99
2780	ENSDARG00000075821	plxnb1a	15	1	0.92	0.13	-0.89	-1.16	1.81	1.29
2990	ENSDARG00000035028	lpcat4	16	1.31	0.75	-0.7	-1.06	-0.29	1.81	-0.41
879	ENSDARG00000053005	cd22	2	-0.98	1.55	-0.68	-0.25	0.36	1.8	-1.04
894	ENSDARG00000063626	ddx21	2	-0.82	1.72	-0.28	-0.08	-0.54	1.8	0.26
356	ENSDARG00000089667	MFAP4 (1 of many)	1	-1.13	1.6	-0.35	-0.19	0.07	1.79	-0.42
2603	ENSDARG00000054818	rpl32	11	-0.55	0.46	1.31	-1.33	0.12	1.79	1.19
827	ENSDARG00000053365	rpl31	2	-0.93	1.5	0.48	-0.28	-0.77	1.78	1.25
868	ENSDARG00000053097	hsf2	2	-0.75	1.71	-0.67	-0.07	-0.23	1.78	-0.44
2522	ENSDARG00000089418	si:dkey-164f24.2	9	-0.31	0.56	1.39	-1.22	-0.41	1.78	1.8
2791	ENSDARG00000041623	mt2	15	0.69	1.28	-0.2	-0.5	-1.27	1.78	1.07
3532	ENSDARG00000070826	bpgm	19	0.56	0.49	1.06	-1.29	-0.82	1.78	1.88
925	ENSDARG00000021250	slc25a48	2	-0.4	1.64	-0.04	-0.14	-1.06	1.78	1.02
357	ENSDARG00000077938	cd248b	1	-1.03	1.67	-0.29	-0.1	-0.25	1.77	-0.04
2778	ENSDARG00000089086	mustn1b	15	0.34	1.06	0.67	-0.71	-1.35	1.77	2.02
880	ENSDARG00000077309	si:ch211-209f23.6	2	-0.95	1.52	-0.74	-0.24	0.41	1.76	-1.15
2045	ENSDARG00000103799	kars	6	-1	0.71	0.17	-1.05	1.17	1.76	-1
810	ENSDARG00000036840	krt15	2	-1.37	1.17	0.63	-0.59	0.16	1.76	0.47
885	ENSDARG00000052082	gabarapb	2	-0.25	1.63	-1.12	-0.12	-0.13	1.75	-0.99
4452	ENSDARG00000045091	mrpl10	21	1.14	0.34	0.51	-1.41	-0.58	1.75	1.09
4479	ENSDARG00000103785	sult2st2	21	1.39	0.44	-0.15	-1.31	-0.36	1.75	0.21
2489	ENSDARG00000025850	rps21	9	-0.95	0.68	1.22	-1.06	0.11	1.74	1.11
358	ENSDARG00000042953	cyp2n13	1	-1.04	1.66	-0.31	-0.08	-0.24	1.74	-0.07
821	ENSDARG00000042440	p2rx7	2	-1.09	1.53	0.33	-0.21	-0.56	1.74	0.89
865	ENSDARG00000093042	si:dkey-104n9.1	2	-0.81	1.68	-0.72	-0.06	-0.08	1.74	-0.64
872	ENSDARG00000002396	cry-dash	2	-0.55	1.7	-0.87	-0.04	-0.23	1.74	-0.64
882	ENSDARG00000075015	soul5	2	-0.85	1.55	-0.85	-0.19	0.33	1.74	-1.18
869	ENSDARG00000035435	m17	2	-0.75	1.71	-0.66	-0.02	-0.27	1.73	-0.39
2781	ENSDARG00000057414	phb	15	1.01	0.85	0.23	-0.88	-1.2	1.73	1.43
866	ENSDARG00000027529	hmox1a	2	-0.72	1.7	-0.75	-0.02	-0.2	1.72	-0.55
881	ENSDARG00000004771	ankrd10b	2	-0.9	1.55	-0.81	-0.16	0.33	1.71	-1.14
893	ENSDARG00000104199	si:dkey-43p13.5	2	-0.5	1.72	-0.55	0.01	-0.69	1.71	0.14
2483	ENSDARG00000041232	rps29	9	-0.79	0.43	1.15	-1.28	0.49	1.71	0.66
2488	ENSDARG00000100588	rpl36	9	-0.86	0.53	1.23	-1.18	0.28	1.71	0.95
2515	ENSDARG00000013307	rpl19	9	-0.45	0.51	1.42	-1.2	-0.29	1.71	1.71
2782	ENSDARG00000079263	si:dkeyp-2e4.2	15	0.95	0.84	0.31	-0.87	-1.24	1.71	1.55
2047	ENSDARG00000029003	eif1axa	6	-0.81	0.4	0.7	-1.3	1.01	1.7	-0.31
2785	ENSDARG00000037593	prickle2b	15	0.7	1.1	0.17	-0.6	-1.38	1.7	1.55
864	ENSDARG00000105118	zgc:171566	2	-0.85	1.66	-0.72	-0.04	-0.06	1.7	-0.66
2784	ENSDARG00000076836	gpx4b	15	0.57	1.13	0.29	-0.56	-1.42	1.69	1.71
360	ENSDARG00000091813	si:dkey-21a6.5	1	-1.16	1.6	-0.2	-0.08	-0.16	1.68	-0.04
4409	ENSDARG00000045797	si:ch211-68a17.7	21	0.35	0.1	1.17	-1.58	-0.04	1.68	1.21
366	ENSDARG00000003681	eif5	1	-1.36	1.43	-0.04	-0.25	0.23	1.68	-0.27
2995	ENSDARG00000089187	wfdc2	16	1.24	0.94	-0.69	-0.74	-0.75	1.68	0.06
4454	ENSDARG00000027799	ucmaa	21	1.27	0.41	0.31	-1.27	-0.71	1.68	1.02
4483	ENSDARG00000003695	vdac3	21	1.28	0.16	0.08	-1.52	-0.01	1.68	0.09
163	ENSDARG00000102318	il6	1	-0.91	1.6	-0.77	-0.07	0.15	1.67	-0.92
896	ENSDARG00000103343	si:dkey-51d8.1	2	-0.9	1.69	-0.44	0.02	-0.36	1.67	-0.08
1673	ENSDARG00000025757	tspan35	4	-1.42	1.16	0.19	-0.51	0.58	1.67	-0.39
2485	ENSDARG00000092807	si:dkey-151g10.6	9	-1.09	0.63	1.08	-1.04	0.41	1.67	0.67
2604	ENSDARG00000035860	rps28	11	-0.38	0.28	1.35	-1.39	0.14	1.67	1.21
814	ENSDARG00000021257	eif3d	2	-1.4	1.24	0.57	-0.42	0	1.66	0.57
166	ENSDARG00000011770	dhrs12	1	-1.06	1.54	-0.64	-0.11	0.27	1.65	-0.91
2484	ENSDARG00000006413	rpl38	9	-1.16	0.68	1.04	-0.97	0.41	1.65	0.63
2602	ENSDARG00000058105	rpl36a	11	-0.63	0.41	1.37	-1.24	0.09	1.65	1.28
2790	ENSDARG00000033662	scd	15	0.76	1.28	-0.46	-0.37	-1.2	1.65	0.74
2993	ENSDARG00000114695	hmox2a	16	1.33	0.81	-0.67	-0.84	-0.64	1.65	-0.03
2478	ENSDARG00000042566	rps7	9	-1.18	0.78	1.12	-0.86	0.14	1.64	0.98
4407	ENSDARG00000098059	fkbp3	21	0.59	0.04	1.04	-1.6	-0.06	1.64	1.1
2513	ENSDARG00000036298	rps13	9	-0.18	0.47	1.44	-1.17	-0.55	1.64	1.99
1176	ENSDARG00000105521	si:ch73-40a2.1	3	-1.25	1.3	-0.4	-0.33	0.68	1.63	-1.08
809	ENSDARG00000056119	eef1g	2	-1.38	1.05	0.8	-0.58	0.11	1.63	0.69
826	ENSDARG00000059933	plpp3	2	-0.83	1.4	0.61	-0.23	-0.96	1.63	1.57
4466	ENSDARG00000013623	vdac2	21	1.12	0.16	0.61	-1.47	-0.43	1.63	1.04
2046	ENSDARG00000099980	bpifcl	6	-0.99	0.72	-0.12	-0.9	1.29	1.62	-1.41
2475	ENSDARG00000006691	rpl12	9	-0.92	0.65	1.34	-0.97	-0.09	1.62	1.43
2480	ENSDARG00000035018	thy1	9	-1.23	1.02	1.02	-0.6	-0.22	1.62	1.24
1015	ENSDARG00000011449	fes	3	-1.04	1.37	-0.75	-0.24	0.66	1.61	-1.41
825	ENSDARG00000035914	tmem167a	2	-1.19	1.52	0.2	-0.08	-0.45	1.6	0.65
3594	ENSDARG00000024478	mpc2	19	1.23	0.83	-0.23	-0.77	-1.07	1.6	0.84
867	ENSDARG00000070043	dars	2	-0.77	1.67	-0.76	0.07	-0.22	1.6	-0.54
168	ENSDARG00000052997	sema4e	1	-1.04	1.59	-0.61	0	0.06	1.59	-0.67
2997	ENSDARG00000011870	sp8a	16	1.32	0.81	-0.44	-0.78	-0.9	1.59	0.46
3591	ENSDARG00000076241	txlnbb	19	1.07	0.89	-0.02	-0.7	-1.25	1.59	1.23
164	ENSDARG00000087706	dicp3.3	1	-1.14	1.5	-0.59	-0.08	0.3	1.58	-0.89
1016	ENSDARG00000101040	ccl20a.3	3	-0.97	1.35	-0.84	-0.23	0.7	1.58	-1.54
3593	ENSDARG00000013749	slc25a55b	19	1.29	0.7	-0.08	-0.88	-1.03	1.58	0.95
165	ENSDARG00000038541	ccr12a	1	-1.1	1.54	-0.61	-0.03	0.2	1.57	-0.81
2618	ENSDARG00000077717	rpl29	11	-0.29	0.1	1.25	-1.47	0.41	1.57	0.84
4465	ENSDARG00000002082	csnk2a1	21	1.07	0.03	0.67	-1.54	-0.23	1.57	0.9
2481	ENSDARG00000042905	rpl10a	9	-1.21	0.95	1.1	-0.62	-0.21	1.57	1.31
2486	ENSDARG00000036316	rpl39	9	-1.11	0.63	1.19	-0.94	0.24	1.57	0.95
2470	ENSDARG00000093608	ccl34b.1	9	-1.08	0.93	1.19	-0.63	-0.4	1.56	1.59
3592	ENSDARG00000035282	emc6	19	1.21	0.73	0.04	-0.83	-1.15	1.56	1.19
4408	ENSDARG00000012244	ube2e3	21	0.62	-0.06	1	-1.62	0.06	1.56	0.94
871	ENSDARG00000068382	pglyrp5	2	-0.87	1.66	-0.65	0.1	-0.24	1.56	-0.41
162	ENSDARG00000098700	il1b	1	-0.99	1.54	-0.77	-0.01	0.24	1.55	-1.01
815	ENSDARG00000077858	asip1	2	-1.38	1.28	0.59	-0.27	-0.21	1.55	0.8
2469	ENSDARG00000102823	CR759887.3	9	-0.84	1.07	1.1	-0.48	-0.85	1.55	1.95
2588	ENSDARG00000005791	rpl28	11	-0.64	0.26	1.33	-1.29	0.34	1.55	0.99
2787	ENSDARG00000100524	abca3b	15	0.68	1.12	0.08	-0.43	-1.45	1.55	1.53
3561	ENSDARG00000103134	zgc:65873	19	0.64	0.75	0.76	-0.8	-1.35	1.55	2.11
2048	ENSDARG00000014329	npm1a	6	-0.94	0.37	0.69	-1.18	1.06	1.55	-0.37
291	ENSDARG00000090814	si:dkey-18a10.3	1	-1.33	1.49	-0.04	-0.05	-0.08	1.54	0.04
824	ENSDARG00000011564	sfpq	2	-1.19	1.43	0.44	-0.11	-0.57	1.54	1.01
1675	ENSDARG00000105442	si:cabz01100188.1	4	-1.46	0.97	0.38	-0.57	0.67	1.54	-0.29
2511	ENSDARG00000041182	rpl4	9	-0.11	0.27	1.47	-1.27	-0.36	1.54	1.83
2516	ENSDARG00000099380	rpl13	9	-0.38	0.4	1.5	-1.14	-0.38	1.54	1.88
2992	ENSDARG00000042159	RFESD (1 of many)	16	1.46	0.58	-0.65	-0.96	-0.43	1.54	-0.22
3563	ENSDARG00000089026	si:dkey-183k8.2	19	0.86	0.7	0.58	-0.84	-1.31	1.54	1.89
813	ENSDARG00000033285	gsto2	2	-1.46	1.27	0.43	-0.26	0.03	1.53	0.4
3564	ENSDARG00000070607	mrpl36	19	0.88	0.64	0.65	-0.89	-1.27	1.53	1.92
3601	ENSDARG00000017772	mdh1aa	19	1.39	0.62	-0.2	-0.91	-0.9	1.53	0.7
1174	ENSDARG00000059254	illr1	3	-1.32	1.14	-0.28	-0.39	0.86	1.53	-1.14
2620	ENSDARG00000099104	rpl24	11	0.03	0.13	1.41	-1.4	-0.18	1.53	1.59
3569	ENSDARG00000030213	sap30l	19	1.11	0.53	0.48	-0.99	-1.13	1.52	1.61
4405	ENSDARG00000043635	cmc2	21	0.59	-0.03	1.11	-1.55	-0.11	1.52	1.22
1175	ENSDARG00000068653	rhoga	3	-1.28	1.31	-0.45	-0.2	0.62	1.51	-1.07
2468	ENSDARG00000036875	rps12	9	-0.72	0.87	1.3	-0.64	-0.8	1.51	2.1
2991	ENSDARG00000025233	lipt1	16	1.48	0.56	-0.47	-0.95	-0.62	1.51	0.15
3574	ENSDARG00000058597	nt5c3a	19	1.19	0.38	0.52	-1.13	-0.95	1.51	1.47
861	ENSDARG00000003902	ctsl.1	2	-0.94	1.59	-0.77	0.09	0.02	1.5	-0.79
922	ENSDARG00000091888	si:dkeyp-69c1.9	2	-0.57	1.65	-0.33	0.15	-0.91	1.5	0.58
4550	ENSDARG00000061391	grhl1	21	1.06	-0.12	0.47	-1.61	0.2	1.49	0.27
1179	ENSDARG00000068374	si:ch211-132b12.7	3	-1.08	1.2	-0.72	-0.29	0.89	1.49	-1.61
1173	ENSDARG00000055400	si:dkey-56f14.7	3	-1.32	1.16	-0.34	-0.33	0.83	1.49	-1.17
2477	ENSDARG00000011405	rps9	9	-1.24	0.77	1.16	-0.72	0.05	1.49	1.11
2487	ENSDARG00000090697	eif3ea	9	-1.05	0.53	1.29	-0.96	0.19	1.49	1.1
2512	ENSDARG00000025581	rpl10	9	-0.02	0.26	1.48	-1.23	-0.49	1.49	1.97
2517	ENSDARG00000103007	rps3	9	-0.35	0.3	1.52	-1.19	-0.28	1.49	1.8
4453	ENSDARG00000042041	tal2	21	1.22	0.22	0.57	-1.27	-0.73	1.49	1.3
354	ENSDARG00000071345	mgst2	1	-1.25	1.51	-0.38	0.03	0.09	1.48	-0.47
870	ENSDARG00000097746	si:rp71-77l1.1	2	-0.81	1.65	-0.72	0.17	-0.28	1.48	-0.44
921	ENSDARG00000101271	si:ch211-227n13.3	2	-0.57	1.61	-0.15	0.13	-1.03	1.48	0.88
4549	ENSDARG00000044420	dnajc19	21	1.07	-0.15	0.33	-1.61	0.36	1.46	-0.03
843	ENSDARG00000045219	dkk1b	2	-0.7	1.66	-0.69	0.2	-0.47	1.46	-0.22
862	ENSDARG00000024195	znf395b	2	-0.98	1.6	-0.67	0.14	-0.09	1.46	-0.58
2473	ENSDARG00000070849	rps15	9	-0.82	0.5	1.46	-0.96	-0.18	1.46	1.64
2994	ENSDARG00000099399	thrsp	16	1.32	0.83	-0.81	-0.63	-0.71	1.46	-0.1
4455	ENSDARG00000104071	hikeshi	21	1.43	0.23	0.18	-1.23	-0.61	1.46	0.79
351	ENSDARG00000036427	slc3a2a	1	-1.21	1.55	-0.32	0.1	-0.12	1.45	-0.2
844	ENSDARG00000074451	mnd1	2	-0.73	1.66	-0.7	0.21	-0.44	1.45	-0.26
915	ENSDARG00000093022	selenoh	2	-0.45	1.66	-0.69	0.21	-0.72	1.45	0.03
1180	ENSDARG00000074334	si:dkey-1c7.1	3	-0.96	1.16	-0.87	-0.29	0.95	1.45	-1.82
2518	ENSDARG00000019778	rps6	9	-0.54	0.41	1.53	-1.04	-0.36	1.45	1.89
899	ENSDARG00000090557	si:ch1073-110a20.7	2	-0.85	1.62	-0.19	0.18	-0.77	1.44	0.58
901	ENSDARG00000012871	npepl1	2	-1.04	1.6	-0.16	0.16	-0.56	1.44	0.4
976	ENSDARG00000058094	ciarta	3	-1.21	1.26	-0.61	-0.18	0.74	1.44	-1.35
1183	ENSDARG00000103769	si:ch211-147m6.2	3	-0.84	0.98	-0.85	-0.46	1.18	1.44	-2.03
2605	ENSDARG00000037350	rpl9	11	-0.4	0.15	1.46	-1.29	0.08	1.44	1.38
2616	ENSDARG00000035400	btf3	11	-0.1	-0.01	1.35	-1.45	0.21	1.44	1.14
3536	ENSDARG00000090462	mrpl20	19	1.07	0.18	0.79	-1.26	-0.78	1.44	1.57
3590	ENSDARG00000059349	homer2	19	1.13	0.85	-0.11	-0.59	-1.28	1.44	1.17
2589	ENSDARG00000070437	rpl22	11	-0.49	0.09	1.35	-1.34	0.39	1.43	0.96
2789	ENSDARG00000078281	zgc:173575	15	0.73	1.1	-0.03	-0.33	-1.47	1.43	1.44
3562	ENSDARG00000017219	pabpc1a	19	0.67	0.67	0.8	-0.76	-1.38	1.43	2.18
4460	ENSDARG00000103826	gpib	21	1.31	0.14	0.45	-1.29	-0.61	1.43	1.06
2606	ENSDARG00000035871	rpl30	11	-0.51	0.16	1.43	-1.27	0.19	1.43	1.24
2514	ENSDARG00000092693	tpt1	9	-0.16	0.3	1.53	-1.12	-0.55	1.42	2.08
355	ENSDARG00000024940	rnf144b	1	-1.3	1.47	-0.35	0.05	0.13	1.42	-0.48
3535	ENSDARG00000104733	coq4	19	1.11	0.18	0.74	-1.24	-0.8	1.42	1.54
4406	ENSDARG00000016477	eif4a2	21	0.62	-0.12	1.1	-1.54	-0.06	1.42	1.16
1674	ENSDARG00000059654	eif3ba	4	-1.54	1.01	0.42	-0.4	0.52	1.41	-0.1
2476	ENSDARG00000010160	rps15a	9	-1.21	0.62	1.23	-0.79	0.14	1.41	1.09
2597	ENSDARG00000019181	rpsa	11	-0.69	0.33	1.49	-1.08	-0.05	1.41	1.54
2598	ENSDARG00000021864	rplp1	11	-0.65	0.29	1.49	-1.12	-0.02	1.41	1.51
2796	ENSDARG00000011998	bfsp2	15	0.08	1.34	0.12	-0.07	-1.48	1.41	1.6
2996	ENSDARG00000036995	lsm6	16	1.37	0.76	-0.61	-0.65	-0.87	1.41	0.26
3560	ENSDARG00000054560	her15.2	19	0.73	0.71	0.67	-0.7	-1.42	1.41	2.09
2625	ENSDARG00000046157	RPS17	11	0.1	0.1	1.47	-1.3	-0.37	1.4	1.84
3539	ENSDARG00000043848	sod1	19	0.92	0.15	0.97	-1.25	-0.8	1.4	1.77
3595	ENSDARG00000011272	uqcc2	19	1.36	0.7	-0.33	-0.7	-1.03	1.4	0.7
1672	ENSDARG00000045598	si:dkey-180p18.9	4	-1.51	1.07	0.08	-0.32	0.68	1.39	-0.6
3598	ENSDARG00000076667	ccng1	19	1.39	0.51	0	-0.87	-1.03	1.38	1.03
155	ENSDARG00000004405	snx10a	1	-1.03	1.5	-0.8	0.13	0.19	1.37	-0.99
367	ENSDARG00000076283	snrpd3l	1	-1.52	1.24	0.06	-0.13	0.35	1.37	-0.29
3565	ENSDARG00000036830	krt91	19	0.89	0.61	0.63	-0.76	-1.37	1.37	2
3575	ENSDARG00000013921	frya	19	1.23	0.3	0.52	-1.07	-0.98	1.37	1.5
4481	ENSDARG00000004706	syf2	21	1.48	0.04	-0.15	-1.33	-0.05	1.37	-0.1
4486	ENSDARG00000038139	pdgfbb	21	1.53	0.14	-0.09	-1.23	-0.36	1.37	0.27
161	ENSDARG00000099313	naga	1	-0.9	1.48	-0.96	0.11	0.27	1.37	-1.23
362	ENSDARG00000010519	per3	1	-1.28	1.43	-0.48	0.06	0.27	1.37	-0.75
325	ENSDARG00000076010	twist1b	1	-1.17	1.55	-0.13	0.19	-0.44	1.36	0.31
2540	ENSDARG00000024141	cav3	9	0.24	0.26	1.41	-1.1	-0.81	1.36	2.22
2599	ENSDARG00000039347	rps24	11	-0.69	0.25	1.49	-1.11	0.06	1.36	1.43
353	ENSDARG00000061228	pfdn4	1	-1.33	1.46	-0.27	0.1	0.04	1.36	-0.31
822	ENSDARG00000011201	rplp2l	2	-1.16	1.4	0.44	0.04	-0.72	1.36	1.16
2467	ENSDARG00000007344	tcap	9	-0.85	0.85	1.3	-0.51	-0.78	1.36	2.08
3567	ENSDARG00000004377	ppp1r13ba	19	0.9	0.39	0.86	-0.97	-1.17	1.36	2.03
3568	ENSDARG00000044601	rtn4a	19	0.9	0.36	0.88	-1	-1.14	1.36	2.02
3705	ENSDARG00000097753	slirp	19	1.43	0.39	0.08	-0.97	-0.93	1.36	1.01
4416	ENSDARG00000101077	sctr	21	0.54	-0.27	0.53	-1.63	0.83	1.36	-0.3
167	ENSDARG00000096979	NPC2 (1 of many)	1	-1.13	1.51	-0.63	0.16	0.09	1.35	-0.72
2474	ENSDARG00000020197	rpl5a	9	-1.1	0.6	1.36	-0.75	-0.11	1.35	1.47
3572	ENSDARG00000105154	creg1	19	1.24	0.44	0.37	-0.91	-1.14	1.35	1.51
4470	ENSDARG00000032985	mrpl27	21	1.26	-0.01	0.59	-1.36	-0.47	1.35	1.06
4482	ENSDARG00000007285	mrpl57	21	1.41	-0.05	0.2	-1.4	-0.16	1.35	0.36
4487	ENSDARG00000052712	suclg1	21	1.55	0.15	-0.19	-1.2	-0.31	1.35	0.12
863	ENSDARG00000105530	si:dkey-19b23.14	2	-0.91	1.57	-0.82	0.23	-0.07	1.34	-0.75
977	ENSDARG00000098012	itgae.1	3	-1.2	1.32	-0.68	-0.02	0.59	1.34	-1.27
900	ENSDARG00000005926	ak2	2	-0.99	1.57	-0.12	0.24	-0.7	1.33	0.58
1178	ENSDARG00000033160	nr1d1	3	-1.04	1.03	-0.78	-0.3	1.09	1.33	-1.87
2479	ENSDARG00000097505	DNAL1 (1 of many)	9	-1.37	0.78	1.11	-0.55	0.03	1.33	1.08
4413	ENSDARG00000088444	selenol	21	0.27	-0.22	1.17	-1.55	0.33	1.33	0.84
140	ENSDARG00000077082	agtrap	1	-1.11	1.4	-0.78	0.07	0.43	1.33	-1.21
153	ENSDARG00000098627	gspt1l	1	-1.16	1.44	-0.69	0.11	0.31	1.33	-1
288	ENSDARG00000008292	eif2s3	1	-1.37	1.4	0.24	0.07	-0.33	1.33	0.57
154	ENSDARG00000077975	si:ch73-343l4.8	1	-1.04	1.51	-0.78	0.19	0.12	1.32	-0.9
307	ENSDARG00000096728	cpn1	1	-1.18	1.5	0.06	0.18	-0.57	1.32	0.63
808	ENSDARG00000015709	hsd17b12a	2	-1.55	0.99	0.7	-0.33	0.18	1.32	0.52
974	ENSDARG00000032631	ltb4r	3	-1.28	1.33	-0.58	0.01	0.52	1.32	-1.1
2471	ENSDARG00000053542	kctd12.2	9	-1.07	0.87	1.24	-0.45	-0.59	1.32	1.83
2596	ENSDARG00000099022	faua	11	-0.37	0.11	1.54	-1.21	-0.07	1.32	1.61
2788	ENSDARG00000040009	palld	15	0.67	1.07	0.03	-0.25	-1.53	1.32	1.56
4411	ENSDARG00000038456	mrps35	21	0.51	-0.22	1.14	-1.54	0.11	1.32	1.03
4469	ENSDARG00000051889	dhodh	21	1.34	-0.03	0.46	-1.35	-0.43	1.32	0.89
160	ENSDARG00000099546	kynu	1	-0.96	1.4	-0.96	0.08	0.44	1.32	-1.4
2621	ENSDARG00000022456	eno1a	11	0.33	-0.08	1.37	-1.4	-0.22	1.32	1.59
158	ENSDARG00000074322	si:ch211-194m7.3	1	-1.04	1.43	-0.86	0.12	0.34	1.31	-1.2
159	ENSDARG00000014929	p2ry11	1	-1	1.45	-0.89	0.14	0.31	1.31	-1.2
292	ENSDARG00000075343	csf1a	1	-1.36	1.45	-0.09	0.14	-0.15	1.31	0.06
293	ENSDARG00000018303	etv4	1	-1.37	1.43	0.04	0.12	-0.21	1.31	0.25
350	ENSDARG00000022650	cyp2ad3	1	-1.03	1.57	-0.58	0.26	-0.22	1.31	-0.36
1013	ENSDARG00000086337	si:dkey-102g19.3	3	-1.08	1.29	-0.85	-0.02	0.67	1.31	-1.52
979	ENSDARG00000002758	dedd1	3	-1.19	1.28	-0.71	-0.03	0.66	1.31	-1.37
2593	ENSDARG00000021838	rps23	11	-0.44	0.05	1.48	-1.26	0.16	1.31	1.32
2615	ENSDARG00000035692	rps3a	11	-0.28	-0.06	1.39	-1.37	0.32	1.31	1.07
3599	ENSDARG00000045019	aamp	19	1.45	0.47	-0.1	-0.84	-0.98	1.31	0.88
845	ENSDARG00000009942	cdc6	2	-0.69	1.63	-0.6	0.32	-0.65	1.31	0.05
2600	ENSDARG00000041811	rps25	11	-0.66	0.18	1.49	-1.13	0.12	1.31	1.37
4677	ENSDARG00000013075	mrpl11	21	1.28	-0.11	0.51	-1.42	-0.26	1.31	0.77
324	ENSDARG00000021124	cfl1	1	-1.2	1.53	-0.26	0.23	-0.31	1.3	0.05
842	ENSDARG00000091280	si:ch211-66k16.27	2	-0.9	1.61	-0.5	0.31	-0.51	1.3	0.01
897	ENSDARG00000043806	postna	2	-0.9	1.56	-0.09	0.26	-0.83	1.3	0.74
973	ENSDARG00000043436	si:dkey-5n18.1	3	-1.29	1.32	-0.56	0.02	0.52	1.3	-1.08
978	ENSDARG00000079315	lpxn	3	-1.2	1.27	-0.7	-0.03	0.67	1.3	-1.37
1172	ENSDARG00000102762	pik3r5	3	-1.21	0.92	-0.47	-0.38	1.15	1.3	-1.62
2783	ENSDARG00000112301	CU570881.2	15	0.75	0.88	0.34	-0.42	-1.54	1.3	1.88
4458	ENSDARG00000045788	avpr1ab	21	1.39	0.07	0.39	-1.23	-0.63	1.3	1.02
347	ENSDARG00000044135	cenpp	1	-1.08	1.57	-0.33	0.28	-0.44	1.29	0.11
352	ENSDARG00000037121	mat2ab	1	-1.26	1.48	-0.42	0.19	0	1.29	-0.42
2472	ENSDARG00000053457	rpl23	9	-0.89	0.46	1.5	-0.83	-0.23	1.29	1.73
3111	ENSDARG00000002264	mrpl41	16	1.53	0.48	-0.44	-0.81	-0.76	1.29	0.32
3533	ENSDARG00000098739	h2af1al	19	0.78	0.13	1.13	-1.16	-0.88	1.29	2.01
3571	ENSDARG00000045373	pabpn1	19	1.2	0.42	0.44	-0.87	-1.19	1.29	1.63
4412	ENSDARG00000102822	pam16	21	0.57	-0.26	1.08	-1.55	0.16	1.29	0.92
2594	ENSDARG00000029500	rpl34	11	-0.59	0.15	1.52	-1.14	0.06	1.29	1.46
4490	ENSDARG00000076889	ralgapa1	21	1.05	-0.11	0.86	-1.4	-0.4	1.29	1.26
807	ENSDARG00000013931	eif3m	2	-1.49	1.07	0.75	-0.21	-0.12	1.28	0.87
923	ENSDARG00000030177	uchl3	2	-0.45	1.54	-0.21	0.26	-1.15	1.28	0.94
1177	ENSDARG00000055901	steap4	3	-1.12	1.07	-0.74	-0.21	1	1.28	-1.74
3566	ENSDARG00000037266	myoz2b	19	1.01	0.38	0.73	-0.9	-1.22	1.28	1.95
329	ENSDARG00000033539	paics	1	-1.14	1.54	-0.21	0.27	-0.46	1.27	0.25
346	ENSDARG00000079564	myh7	1	-1.01	1.58	-0.44	0.31	-0.43	1.27	-0.01
2503	ENSDARG00000007320	rpl7	9	-0.64	0.1	1.47	-1.17	0.24	1.27	1.23
2519	ENSDARG00000014867	rpl8	9	-0.5	0.26	1.59	-1.01	-0.34	1.27	1.93
2595	ENSDARG00000055996	rps8a	11	-0.55	0.09	1.51	-1.18	0.13	1.27	1.38
2619	ENSDARG00000030408	rps26l	11	0.07	-0.12	1.43	-1.39	0.02	1.27	1.41
3519	ENSDARG00000010400	lrrfip2	19	0.66	0.35	1.09	-0.92	-1.19	1.27	2.28
3534	ENSDARG00000092387	zgc:193742	19	0.74	0.03	1.18	-1.24	-0.72	1.27	1.9
3576	ENSDARG00000074507	rmdn1	19	1.32	0.27	0.42	-1	-1	1.27	1.42
4551	ENSDARG00000053404	PPP2CA	21	1.06	-0.3	0.49	-1.57	0.32	1.27	0.17
363	ENSDARG00000005451	gdi2	1	-1.45	1.33	-0.24	0.07	0.29	1.26	-0.53
2617	ENSDARG00000077533	eif3f	11	0.03	-0.2	1.31	-1.46	0.32	1.26	0.99
4471	ENSDARG00000060489	mrpl32	21	1.25	-0.11	0.62	-1.37	-0.4	1.26	1.02
139	ENSDARG00000109648	si:ch211-147m6.1	1	-1.12	1.38	-0.81	0.13	0.42	1.25	-1.23
141	ENSDARG00000053836	si:ch211-284o19.8	1	-1.04	1.39	-0.9	0.14	0.41	1.25	-1.31
150	ENSDARG00000059049	zgc:174904	1	-1.25	1.41	-0.59	0.16	0.27	1.25	-0.86
823	ENSDARG00000058206	si:ch211-153b23.5	2	-1.24	1.37	0.38	0.12	-0.64	1.25	1.02
1182	ENSDARG00000018061	neil1	3	-0.88	1.01	-0.98	-0.24	1.09	1.25	-2.07
2036	ENSDARG00000058044	rab1ba	6	-1.18	0.37	0.49	-0.88	1.2	1.25	-0.71
2504	ENSDARG00000034291	rpl37	9	-0.77	0.15	1.45	-1.1	0.27	1.25	1.18
2528	ENSDARG00000077291	rps2	9	-0.29	1.05	0.86	-0.2	-1.43	1.25	2.29
2770	ENSDARG00000095273	cox8a	15	0.25	1.45	-0.94	0.2	-0.95	1.25	0.01
3556	ENSDARG00000006837	mycn	19	0.97	0.62	0.48	-0.63	-1.43	1.25	1.91
4457	ENSDARG00000045978	chchd6b	21	1.47	0.06	0.25	-1.19	-0.6	1.25	0.85
4472	ENSDARG00000039719	mrps26	21	1.14	-0.04	0.8	-1.29	-0.61	1.25	1.41
4510	ENSDARG00000038076	romo1	21	1.02	-0.22	0.85	-1.47	-0.17	1.25	1.02
297	ENSDARG00000018562	cope	1	-1.45	1.36	0.11	0.12	-0.14	1.24	0.25
841	ENSDARG00000056473	chaf1b	2	-0.86	1.59	-0.67	0.35	-0.41	1.24	-0.26
2459	ENSDARG00000009285	rpl15	9	-1.29	0.93	1.1	-0.31	-0.43	1.24	1.53
4489	ENSDARG00000003632	zgc:172270	21	0.87	-0.08	1.09	-1.32	-0.56	1.24	1.65
4508	ENSDARG00000069832	sfxn4	21	1.06	-0.26	0.75	-1.5	-0.05	1.24	0.8
4678	ENSDARG00000115557	cox7b	21	1.26	-0.2	0.54	-1.44	-0.17	1.24	0.71
6	ENSDARG00000071336	mif	1	-1.54	1.23	0.33	0	-0.01	1.23	0.34
47	ENSDARG00000058656	desma	1	-0.61	1.41	0.26	0.18	-1.24	1.23	1.5
365	ENSDARG00000029445	zgc:56676	1	-1.4	1.38	-0.3	0.15	0.18	1.23	-0.48
898	ENSDARG00000041703	rrbp1b	2	-0.89	1.55	-0.14	0.32	-0.83	1.23	0.69
924	ENSDARG00000018146	gpx1a	2	-0.37	1.55	-0.4	0.32	-1.1	1.23	0.7
2775	ENSDARG00000101521	UBE2M	15	0.38	1.37	-0.64	0.14	-1.24	1.23	0.6
3557	ENSDARG00000041779	trdn	19	1.14	0.51	0.4	-0.72	-1.33	1.23	1.73
3573	ENSDARG00000067717	tomm7	19	1.19	0.3	0.58	-0.93	-1.14	1.23	1.72
4480	ENSDARG00000097696	si:ch73-71c20.5	21	1.54	-0.03	-0.14	-1.26	-0.11	1.23	-0.03
2774	ENSDARG00000015460	racgap1	15	0.23	1.41	-0.56	0.19	-1.27	1.22	0.71
3589	ENSDARG00000001354	slc6a22.2	19	1.37	0.45	0.09	-0.77	-1.14	1.22	1.23
4509	ENSDARG00000001788	atp5po	21	1.11	-0.23	0.77	-1.45	-0.21	1.22	0.98
4548	ENSDARG00000021059	alas1	21	1.32	-0.24	0.21	-1.46	0.16	1.22	0.05
299	ENSDARG00000008237	sars	1	-1.52	1.29	0.16	0.08	-0.01	1.21	0.17
308	ENSDARG00000055868	rsl1d1	1	-1.25	1.47	-0.02	0.26	-0.46	1.21	0.44
1014	ENSDARG00000012426	neflb	3	-1	1.22	-0.98	0.01	0.75	1.21	-1.73
986	ENSDARG00000105033	BX897691.1	3	-1.35	1.15	-0.51	-0.06	0.76	1.21	-1.27
3600	ENSDARG00000043665	glrx5	19	1.48	0.42	-0.11	-0.79	-1	1.21	0.89
914	ENSDARG00000078069	rrm2	2	-0.41	1.58	-0.78	0.38	-0.77	1.2	-0.01
3544	ENSDARG00000005368	mcamb	19	0.77	0.66	0.62	-0.54	-1.51	1.2	2.13
4491	ENSDARG00000042799	atpaf1	21	1.08	-0.15	0.88	-1.35	-0.46	1.2	1.34
975	ENSDARG00000100461	CABZ01078737.1	3	-1.27	1.28	-0.65	0.08	0.56	1.2	-1.21
984	ENSDARG00000100649	tlr1	3	-1.22	1.15	-0.71	-0.05	0.82	1.2	-1.53
2624	ENSDARG00000057556	rpl17	11	-0.01	0.03	1.57	-1.17	-0.41	1.2	1.98
3570	ENSDARG00000022788	cops7a	19	1.25	0.37	0.41	-0.83	-1.2	1.2	1.61
3578	ENSDARG00000017337	zgc:77929	19	1.36	0.15	0.45	-1.05	-0.9	1.2	1.35
298	ENSDARG00000044565	ola1	1	-1.46	1.35	0.02	0.16	-0.07	1.19	0.09
156	ENSDARG00000104399	tppp	1	-0.99	1.44	-0.91	0.25	0.21	1.19	-1.12
328	ENSDARG00000102452	eif3ha	1	-1.1	1.53	-0.23	0.34	-0.54	1.19	0.31
839	ENSDARG00000091692	havcr2	2	-0.79	1.58	-0.69	0.39	-0.5	1.19	-0.19
985	ENSDARG00000101369	CABZ01090890.1	3	-1.36	1.2	-0.52	0.01	0.67	1.19	-1.19
2460	ENSDARG00000036371	acta1a	9	-1.17	0.68	1.34	-0.51	-0.35	1.19	1.69
2592	ENSDARG00000103433	rpl14	11	-0.51	0	1.51	-1.19	0.18	1.19	1.33
2856	ENSDARG00000042091	btbd2a	16	1.25	0.76	-0.35	-0.43	-1.24	1.19	0.89
4414	ENSDARG00000068436	h3f3b.1	21	0.37	-0.28	1.27	-1.47	0.12	1.19	1.15
4459	ENSDARG00000101110	si:ch211-152c8.4	21	1.42	-0.01	0.41	-1.2	-0.62	1.19	1.03
4492	ENSDARG00000003795	idh2	21	0.85	-0.23	1.07	-1.42	-0.27	1.19	1.34
4560	ENSDARG00000015551	fth1a	21	0.88	-0.37	0.76	-1.56	0.28	1.19	0.48
905	ENSDARG00000002344	tubb4b	2	-0.85	1.57	-0.41	0.39	-0.7	1.18	0.29
909	ENSDARG00000100028	pole2	2	-0.96	1.54	-0.23	0.36	-0.71	1.18	0.48
2732	ENSDARG00000089361	wu:fb59d01	13	1.05	0.51	-1.39	-0.67	0.51	1.18	-1.9
3596	ENSDARG00000101295	psmd4a	19	1.45	0.51	-0.22	-0.67	-1.07	1.18	0.85
4410	ENSDARG00000045230	cox6b1	21	0.45	-0.38	0.96	-1.56	0.53	1.18	0.43
4681	ENSDARG00000005870	mmadhc	21	1.41	-0.19	0.3	-1.37	-0.16	1.18	0.46
290	ENSDARG00000019541	gpt2l	1	-1.35	1.4	0.11	0.22	-0.38	1.18	0.49
349	ENSDARG00000071211	zgc:112255	1	-1.18	1.5	-0.48	0.32	-0.16	1.18	-0.32
1003	ENSDARG00000090194	lamtor5	3	-1.13	1.16	-0.83	-0.02	0.83	1.18	-1.66
1170	ENSDARG00000053124	si:dkey-148a17.6	3	-1.32	0.97	-0.47	-0.21	1.03	1.18	-1.5
3558	ENSDARG00000105223	pmp22a	19	0.59	0.46	1.04	-0.72	-1.36	1.18	2.4
913	ENSDARG00000004169	stmn1a	2	-0.54	1.58	-0.7	0.41	-0.75	1.17	0.05
4484	ENSDARG00000019222	mrpl24	21	1.59	0.06	-0.07	-1.11	-0.47	1.17	0.4
361	ENSDARG00000060471	gcnt3	1	-1.37	1.31	-0.47	0.14	0.39	1.17	-0.86
2591	ENSDARG00000041435	uba52	11	-0.55	-0.08	1.35	-1.25	0.54	1.17	0.81
2852	ENSDARG00000075933	cox15	16	1.22	0.84	-0.52	-0.33	-1.2	1.17	0.68
3520	ENSDARG00000023963	tpm4a	19	0.71	0.15	1.18	-1.02	-1.02	1.17	2.2
3704	ENSDARG00000020679	clpp	19	1.45	0.23	0.22	-0.94	-0.96	1.17	1.18
4456	ENSDARG00000061256	si:dkey-44g23.5	21	1.53	0	0.16	-1.17	-0.53	1.17	0.69
4504	ENSDARG00000098584	CABZ01102240.1	21	0.86	-0.31	0.99	-1.48	-0.06	1.17	1.05
852	ENSDARG00000094983	ccl34a.3	2	-0.94	1.53	-0.79	0.37	-0.17	1.16	-0.62
2537	ENSDARG00000010052	ndrg3b	9	-0.41	0.51	1.5	-0.65	-0.95	1.16	2.45
151	ENSDARG00000036074	cebpa	1	-1.2	1.39	-0.71	0.23	0.28	1.16	-0.99
2506	ENSDARG00000018334	rpl35	9	-0.94	0.09	1.24	-1.06	0.66	1.15	0.58
53	ENSDARG00000031763	smad6b	1	-1.09	1.4	0.29	0.25	-0.84	1.15	1.13
157	ENSDARG00000052322	tlr5b	1	-0.94	1.43	-0.97	0.28	0.2	1.15	-1.17
989	ENSDARG00000033587	CABZ01088134.1	3	-1.14	1.27	-0.85	0.12	0.6	1.15	-1.45
1169	ENSDARG00000042864	rpl7l1	3	-1.48	0.89	-0.11	-0.26	0.96	1.15	-1.07
2614	ENSDARG00000005513	naca	11	-0.37	-0.12	1.47	-1.27	0.29	1.15	1.18
2623	ENSDARG00000058451	rpl6	11	0.04	-0.08	1.55	-1.23	-0.28	1.15	1.83
52	ENSDARG00000037555	atoh8	1	-1.04	1.32	0.49	0.18	-0.95	1.14	1.44
840	ENSDARG00000091835	si:ch73-264p11.1	2	-0.77	1.57	-0.71	0.43	-0.51	1.14	-0.2
906	ENSDARG00000101813	nap1l1	2	-0.96	1.55	-0.39	0.41	-0.61	1.14	0.22
1394	ENSDARG00000055889	zgc:153215	3	-1.2	0.65	-0.29	-0.49	1.34	1.14	-1.63
2034	ENSDARG00000040666	nifk	6	-1.34	0.51	0.23	-0.63	1.23	1.14	-1
2035	ENSDARG00000105498	TSC22D3 (1 of many)	6	-1.15	0.28	0.46	-0.86	1.28	1.14	-0.82
2541	ENSDARG00000014690	rps4x	9	0.25	0.14	1.47	-1	-0.86	1.14	2.33
4474	ENSDARG00000013880	spata20	21	1.2	-0.12	0.78	-1.26	-0.59	1.14	1.37
152	ENSDARG00000058710	terf1	1	-1.24	1.38	-0.66	0.24	0.28	1.14	-0.94
184	ENSDARG00000101707	si:ch211-156b7.4	1	-1.21	1.44	-0.6	0.3	0.07	1.14	-0.67
1001	ENSDARG00000039234	zgc:171579	3	-1.18	1.17	-0.8	0.03	0.77	1.14	-1.57
2786	ENSDARG00000069910	gtf2f2a	15	0.77	0.95	0.04	-0.19	-1.57	1.14	1.61
4682	ENSDARG00000075743	mrpl47	21	1.38	-0.24	0.36	-1.38	-0.12	1.14	0.48
143	ENSDARG00000097909	si:dkey-195m11.11	1	-1.09	1.3	-0.9	0.17	0.52	1.13	-1.42
1181	ENSDARG00000111882	si:ch211-194m7.4	3	-1.05	1.05	-0.91	-0.08	0.99	1.13	-1.9
2502	ENSDARG00000029533	rpl18	9	-0.71	0.05	1.51	-1.08	0.23	1.13	1.28
3113	ENSDARG00000025948	mlh1	16	1.63	0.22	-0.6	-0.91	-0.34	1.13	-0.26
3515	ENSDARG00000113254	CABZ01070469.1	19	0.87	0.2	1.01	-0.93	-1.15	1.13	2.16
4488	ENSDARG00000052073	blcap	21	0.97	-0.18	1.03	-1.31	-0.51	1.13	1.54
7	ENSDARG00000005789	enpp1	1	-1.55	1.24	0.06	0.11	0.14	1.13	-0.08
55	ENSDARG00000054458	slmapa	1	-0.87	1.19	0.74	0.06	-1.13	1.13	1.87
990	ENSDARG00000088171	ciartb	3	-1.1	1.24	-0.9	0.11	0.65	1.13	-1.55
988	ENSDARG00000078363	mcoln3a	3	-1.17	1.22	-0.82	0.09	0.68	1.13	-1.5
2590	ENSDARG00000023298	rps27.1	11	-0.63	-0.04	1.44	-1.17	0.4	1.13	1.04
2622	ENSDARG00000102317	rpl26	11	0.12	-0.13	1.53	-1.26	-0.25	1.13	1.78
4473	ENSDARG00000112495	mmp21	21	1.22	-0.11	0.76	-1.24	-0.62	1.13	1.38
4507	ENSDARG00000079782	myh7l	21	1.1	-0.33	0.74	-1.46	-0.05	1.13	0.79
142	ENSDARG00000095939	si:ch73-226l13.2	1	-1.07	1.35	-0.91	0.23	0.4	1.12	-1.31
4555	ENSDARG00000075616	polr2k	21	0.9	-0.43	0.5	-1.55	0.59	1.12	-0.09
48	ENSDARG00000074201	flna	1	-0.62	1.39	0.21	0.27	-1.25	1.12	1.46
982	ENSDARG00000078547	si:ch211-264f5.2	3	-1.31	1.15	-0.62	0.03	0.76	1.12	-1.38
4493	ENSDARG00000014976	lims2	21	0.81	-0.29	1.11	-1.41	-0.23	1.12	1.34
364	ENSDARG00000037397	ssrp1a	1	-1.39	1.37	-0.35	0.26	0.11	1.11	-0.46
2538	ENSDARG00000094491	si:ch211-202m22.1	9	-0.28	0.32	1.58	-0.79	-0.83	1.11	2.41
2613	ENSDARG00000053058	rps11	11	-0.13	-0.21	1.47	-1.32	0.19	1.11	1.28
4418	ENSDARG00000058285	cpt1b	21	0.73	-0.42	0.28	-1.53	0.93	1.11	-0.65
983	ENSDARG00000094485	si:dkey-27h10.2	3	-1.24	1.13	-0.73	0.02	0.82	1.11	-1.55
3001	ENSDARG00000101180	mcm7	16	1.37	0.71	-1.01	-0.4	-0.68	1.11	-0.33
3555	ENSDARG00000022564	zgc:56106	19	1.05	0.57	0.38	-0.54	-1.46	1.11	1.84
3597	ENSDARG00000045132	vdac1	19	1.51	0.41	-0.21	-0.7	-1.02	1.11	0.81
918	ENSDARG00000087206	cct2	2	-0.78	1.51	-0.21	0.41	-0.94	1.1	0.73
980	ENSDARG00000092653	si:dkey-1h24.6	3	-1.33	1.08	-0.58	-0.02	0.85	1.1	-1.43
2505	ENSDARG00000104227	nop10	9	-0.84	0.11	1.5	-0.99	0.21	1.1	1.29
2857	ENSDARG00000071562	mtus1a	16	1.31	0.7	-0.4	-0.4	-1.21	1.1	0.81
3538	ENSDARG00000032389	tspan12	19	1.04	0	0.95	-1.1	-0.89	1.1	1.84
4467	ENSDARG00000100157	tamm41	21	1.35	-0.13	0.57	-1.23	-0.56	1.1	1.13
3110	ENSDARG00000078859	g0s2	16	1.57	0.41	-0.51	-0.69	-0.79	1.1	0.28
4485	ENSDARG00000099997	cox20	21	1.61	-0.04	-0.1	-1.14	-0.33	1.1	0.23
4506	ENSDARG00000109510	lsm12b	21	1.05	-0.34	0.83	-1.44	-0.1	1.1	0.93
148	ENSDARG00000058222	mpp4a	1	-1.2	1.33	-0.76	0.24	0.4	1.09	-1.16
2244	ENSDARG00000095451	si:ch211-196l7.4	6	-0.25	-0.23	0.38	-1.32	1.42	1.09	-1.04
2576	ENSDARG00000019230	rpl7a	11	-0.33	0.11	1.65	-0.98	-0.45	1.09	2.1
4562	ENSDARG00000112931	ndufaf3	21	0.77	-0.41	0.99	-1.5	0.14	1.09	0.85
313	ENSDARG00000101794	atp6v0e1	1	-1.32	1.43	-0.25	0.34	-0.2	1.09	-0.05
348	ENSDARG00000102798	mcm2	1	-1.15	1.48	-0.56	0.39	-0.16	1.09	-0.4
1002	ENSDARG00000063292	ssuh2rs1	3	-1.2	1.15	-0.79	0.06	0.79	1.09	-1.58
1438	ENSDARG00000042521	si:dkey-251i10.1	3	-0.81	0.5	-0.62	-0.59	1.53	1.09	-2.15
3587	ENSDARG00000034757	zdhhc2	19	1.37	0.49	-0.03	-0.6	-1.23	1.09	1.2
345	ENSDARG00000046092	si:ch211-283g2.3	1	-1.13	1.5	-0.4	0.42	-0.39	1.08	-0.01
848	ENSDARG00000019507	mcm5	2	-1.02	1.51	-0.67	0.43	-0.26	1.08	-0.41
2461	ENSDARG00000071113	xirp2a	9	-1.13	0.68	1.36	-0.4	-0.5	1.08	1.86
2495	ENSDARG00000040439	rsl24d1	9	-1.23	0.24	1.01	-0.84	0.83	1.08	0.18
3112	ENSDARG00000078113	atp5mea	16	1.61	0.34	-0.59	-0.74	-0.62	1.08	0.03
3537	ENSDARG00000101759	homer1b	19	0.98	0.01	1.01	-1.07	-0.93	1.08	1.94
3588	ENSDARG00000110346	LO018557.1	19	1.4	0.39	0.09	-0.69	-1.19	1.08	1.28
4552	ENSDARG00000103198	mrps2	21	1.22	-0.39	0.25	-1.47	0.39	1.08	-0.14
4679	ENSDARG00000042345	si:dkeyp-55f12.3	21	1.33	-0.32	0.4	-1.4	-0.01	1.08	0.41
289	ENSDARG00000017445	eif3i	1	-1.45	1.32	0.15	0.25	-0.27	1.07	0.42
1171	ENSDARG00000038793	ccdc24	3	-1.4	0.9	-0.38	-0.17	1.04	1.07	-1.42
3105	ENSDARG00000090108	si:ch1073-174d20.1	16	1.65	0.1	-0.28	-0.97	-0.5	1.07	0.22
3579	ENSDARG00000061688	arvcfb	19	1.38	0.1	0.46	-0.97	-0.97	1.07	1.43
8	ENSDARG00000076568	sec61b	1	-1.6	1.15	0.03	0.08	0.33	1.07	-0.3
9	ENSDARG00000079488	zgc:195282	1	-1.62	1.13	0.17	0.06	0.26	1.07	-0.09
182	ENSDARG00000052816	shmt1	1	-1.16	1.42	-0.71	0.35	0.11	1.07	-0.82
275	ENSDARG00000023299	snu13b	1	-1.51	1.15	-0.27	0.08	0.56	1.07	-0.83
169	ENSDARG00000103466	ccl35.1	1	-1.07	1.43	-0.82	0.37	0.09	1.06	-0.91
174	ENSDARG00000045224	glipr1a	1	-1.01	1.46	-0.83	0.4	-0.01	1.06	-0.82
273	ENSDARG00000088439	gm2a	1	-1.47	1.07	-0.35	0.01	0.74	1.06	-1.09
294	ENSDARG00000009212	ppiaa	1	-1.44	1.35	-0.04	0.29	-0.15	1.06	0.11
326	ENSDARG00000006526	fn1b	1	-1.26	1.44	-0.13	0.38	-0.43	1.06	0.3
838	ENSDARG00000102175	hamp	2	-0.78	1.54	-0.74	0.48	-0.5	1.06	-0.24
851	ENSDARG00000040764	id1	2	-0.8	1.5	-0.93	0.44	-0.21	1.06	-0.72
855	ENSDARG00000021579	orc5	2	-0.96	1.5	-0.77	0.44	-0.21	1.06	-0.56
910	ENSDARG00000075468	vwa1	2	-1.02	1.49	-0.18	0.43	-0.72	1.06	0.54
2768	ENSDARG00000076554	cdkn1a	15	-0.24	1.49	-0.58	0.43	-1.1	1.06	0.52
2793	ENSDARG00000104782	oaz1b	15	-0.36	1.34	0.15	0.28	-1.41	1.06	1.56
3577	ENSDARG00000036670	aplnrb	19	1.37	0.18	0.41	-0.88	-1.08	1.06	1.49
4683	ENSDARG00000075709	ndufb3	21	1.38	-0.27	0.44	-1.33	-0.22	1.06	0.66
16	ENSDARG00000103791	nme2b.1	1	-1.36	1.23	0.52	0.18	-0.57	1.05	1.09
856	ENSDARG00000030756	dnmt1	2	-0.93	1.5	-0.8	0.45	-0.21	1.05	-0.59
919	ENSDARG00000075707	nid2a	2	-0.81	1.48	-0.11	0.43	-0.99	1.05	0.88
999	ENSDARG00000077308	gpr84	3	-1.14	1.09	-0.86	0.04	0.87	1.05	-1.73
2575	ENSDARG00000025073	rpl18a	11	-0.45	0.12	1.66	-0.93	-0.4	1.05	2.06
2855	ENSDARG00000061004	cox11	16	1.25	0.74	-0.39	-0.31	-1.29	1.05	0.9
3107	ENSDARG00000103443	vwde	16	1.61	0.29	-0.35	-0.76	-0.79	1.05	0.44
3109	ENSDARG00000098401	fam136a	16	1.59	0.24	-0.17	-0.81	-0.85	1.05	0.68
3693	ENSDARG00000004785	cops2	19	1.48	0.12	0.26	-0.93	-0.93	1.05	1.19
4561	ENSDARG00000091079	si:zfos-1192g2.3	21	0.89	-0.46	0.8	-1.51	0.27	1.05	0.53
312	ENSDARG00000054155	pcna	1	-1.3	1.43	-0.26	0.38	-0.25	1.05	-0.01
170	ENSDARG00000101914	metrnla	1	-1.12	1.41	-0.77	0.37	0.11	1.04	-0.88
908	ENSDARG00000098588	gchfr	2	-0.99	1.49	-0.21	0.45	-0.74	1.04	0.53
1393	ENSDARG00000003941	rrs1	3	-1.38	0.64	-0.08	-0.4	1.23	1.04	-1.31
2601	ENSDARG00000030602	rps19	11	-0.58	0.05	1.63	-0.99	-0.12	1.04	1.75
2825	ENSDARG00000093374	si:ch73-18b11.1	15	0.52	0.71	0.71	-0.33	-1.62	1.04	2.33
3580	ENSDARG00000045200	dusp19b	19	1.31	0.56	-0.07	-0.48	-1.32	1.04	1.25
4417	ENSDARG00000063509	lrrc58b	21	0.55	-0.44	0.25	-1.48	1.12	1.04	-0.87
4461	ENSDARG00000062568	mrpl2	21	1.44	-0.13	0.45	-1.17	-0.58	1.04	1.03
180	ENSDARG00000033437	rps6ka1	1	-1.28	1.38	-0.57	0.34	0.14	1.04	-0.71
4462	ENSDARG00000039350	ssbp1	21	1.47	-0.09	0.38	-1.13	-0.64	1.04	1.02
149	ENSDARG00000005049	rab20	1	-1.2	1.3	-0.79	0.27	0.42	1.03	-1.21
835	ENSDARG00000056795	serpine1	2	-0.93	1.52	-0.59	0.49	-0.49	1.03	-0.1
911	ENSDARG00000029905	phyhd1	2	-1.05	1.48	-0.18	0.45	-0.7	1.03	0.52
1136	ENSDARG00000056885	per1a	3	-1.09	0.9	-0.83	-0.13	1.14	1.03	-1.97
3549	ENSDARG00000027824	top1mt	19	0.96	0.39	0.71	-0.64	-1.42	1.03	2.13
3554	ENSDARG00000002362	ubald1a	19	1.12	0.48	0.39	-0.55	-1.44	1.03	1.83
4475	ENSDARG00000116628	BX908782.3	21	1.25	-0.16	0.75	-1.19	-0.64	1.03	1.39
4511	ENSDARG00000092787	si:dkey-88p24.11	21	1.08	-0.41	0.77	-1.44	0.01	1.03	0.76
3635	ENSDARG00000075422	MRPL49	19	1.3	-0.1	0.67	-1.13	-0.74	1.03	1.41
274	ENSDARG00000068380	foxg1c	1	-1.56	1.07	-0.19	0.05	0.62	1.02	-0.81
305	ENSDARG00000014324	sh2d5	1	-1.24	1.37	0.19	0.35	-0.66	1.02	0.85
327	ENSDARG00000035993	sumo3b	1	-1.26	1.42	-0.1	0.4	-0.46	1.02	0.36
853	ENSDARG00000041828	si:dkeyp-28d2.4	2	-0.95	1.49	-0.78	0.47	-0.23	1.02	-0.55
854	ENSDARG00000042458	rfc4	2	-0.95	1.49	-0.79	0.47	-0.22	1.02	-0.57
995	ENSDARG00000043403	paox1	3	-1.25	1.22	-0.76	0.2	0.59	1.02	-1.35
1000	ENSDARG00000105481	si:ch211-243a20.4	3	-1.18	1.12	-0.83	0.1	0.79	1.02	-1.62
2853	ENSDARG00000115220	BX005085.6	16	1.24	0.77	-0.53	-0.25	-1.23	1.02	0.7
3108	ENSDARG00000112954	zgc:165555	16	1.64	0.22	-0.38	-0.8	-0.69	1.02	0.31
3525	ENSDARG00000028027	trim63a	19	0.54	0.21	1.26	-0.81	-1.2	1.02	2.46
3581	ENSDARG00000070458	zgc:153292	19	1.25	0.53	0.08	-0.49	-1.38	1.02	1.46
3584	ENSDARG00000058874	zgc:113227	19	1.48	0.35	-0.05	-0.67	-1.11	1.02	1.06
3634	ENSDARG00000028533	macf1a	19	1.37	-0.05	0.56	-1.07	-0.81	1.02	1.37
4415	ENSDARG00000010516	rpl21	21	0.37	-0.43	1.22	-1.45	0.29	1.02	0.93
4468	ENSDARG00000074435	ttc19	21	1.34	-0.22	0.62	-1.24	-0.5	1.02	1.12
4515	ENSDARG00000074985	aurkaip1	21	1.16	-0.38	0.74	-1.4	-0.13	1.02	0.87
4680	ENSDARG00000038608	sdhc	21	1.32	-0.36	0.5	-1.37	-0.1	1.01	0.6
175	ENSDARG00000076914	lacc1	1	-0.92	1.45	-0.93	0.44	-0.03	1.01	-0.9
836	ENSDARG00000089706	si:ch211-276a23.5	2	-0.91	1.51	-0.67	0.5	-0.43	1.01	-0.24
912	ENSDARG00000020000	sh3bp4a	2	-1.08	1.47	-0.19	0.46	-0.65	1.01	0.46
968	ENSDARG00000103984	cyth4b	3	-1.37	1.21	-0.58	0.2	0.54	1.01	-1.12
987	ENSDARG00000056615	cybb	3	-1.21	1.19	-0.82	0.18	0.65	1.01	-1.47
1431	ENSDARG00000098837	tgm5l	3	-1	0.42	-0.36	-0.59	1.53	1.01	-1.89
1666	ENSDARG00000044365	angptl3	4	-1.67	0.86	0.44	-0.15	0.51	1.01	-0.07
2626	ENSDARG00000013266	colec11	11	0.33	-0.2	1.49	-1.21	-0.42	1.01	1.91
3516	ENSDARG00000017235	eif5a	19	0.87	0.12	1.05	-0.89	-1.15	1.01	2.2
4464	ENSDARG00000039007	eno3	21	1.47	-0.18	0.4	-1.19	-0.49	1.01	0.89
315	ENSDARG00000058062	magt1	1	-1.33	1.4	-0.18	0.39	-0.29	1.01	0.11
144	ENSDARG00000004979	elovl5	1	-1.13	1.28	-0.88	0.28	0.46	1	-1.34
145	ENSDARG00000099155	tpst2	1	-1.15	1.27	-0.87	0.27	0.48	1	-1.35
341	ENSDARG00000002304	gins2	1	-1.08	1.47	-0.61	0.47	-0.26	1	-0.35
860	ENSDARG00000068978	glo1	2	-0.73	1.51	-0.88	0.51	-0.4	1	-0.48
969	ENSDARG00000012499	per1b	3	-1.34	1.2	-0.63	0.2	0.57	1	-1.2
981	ENSDARG00000040178	havcr1	3	-1.29	1.1	-0.7	0.1	0.79	1	-1.49
997	ENSDARG00000104721	si:dkey-203a12.9	3	-1.24	1.05	-0.75	0.05	0.9	1	-1.65
2821	ENSDARG00000037962	psmb7	15	1	0.64	0.26	-0.36	-1.54	1	1.8
2824	ENSDARG00000087897	h2afy2	15	0.4	0.77	0.7	-0.23	-1.64	1	2.34
2831	ENSDARG00000059815	oaz2b	15	0.2	0.92	0.62	-0.08	-1.65	1	2.27
17	ENSDARG00000037921	gng13b	1	-1.41	1.17	0.59	0.17	-0.52	1	1.11
176	ENSDARG00000028618	krt18b	1	-1.03	1.39	-0.91	0.39	0.17	1	-1.08
3630	ENSDARG00000000369	prkag3b	19	1.22	-0.09	0.79	-1.08	-0.85	0.99	1.64
4463	ENSDARG00000054288	zgc:63972	21	1.46	-0.12	0.42	-1.11	-0.66	0.99	1.08
295	ENSDARG00000038822	mrc1b	1	-1.52	1.27	-0.06	0.28	0.03	0.99	-0.09
907	ENSDARG00000077139	col6a3	2	-0.98	1.48	-0.26	0.49	-0.74	0.99	0.48
2458	ENSDARG00000039422	fuom	9	-1.45	0.8	1.08	-0.19	-0.25	0.99	1.33
2574	ENSDARG00000003599	rpl3	11	-0.49	0.2	1.66	-0.79	-0.58	0.99	2.24
3586	ENSDARG00000058543	lama5	19	1.39	0.42	0.01	-0.57	-1.25	0.99	1.26
3609	ENSDARG00000102531	anapc11	19	1.08	0.06	0.88	-0.93	-1.09	0.99	1.97
3680	ENSDARG00000032802	ktn1	19	1.33	0.25	0.37	-0.74	-1.22	0.99	1.59
3713	ENSDARG00000103713	cd248a	19	1.44	-0.03	0.45	-1.02	-0.83	0.99	1.28
4556	ENSDARG00000104517	uqcr10	21	0.91	-0.52	0.61	-1.51	0.51	0.99	0.1
4684	ENSDARG00000101139	agpat2	21	1.49	-0.29	0.19	-1.28	-0.12	0.99	0.31
4859	ENSDARG00000044521	eef1b2	22	1.42	-0.33	-0.13	-1.32	0.36	0.99	-0.49
5272	ENSDARG00000100944	glrx2	22	1.62	-0.01	0.01	-1	-0.62	0.99	0.63
146	ENSDARG00000000767	spi1b	1	-1.24	1.29	-0.75	0.31	0.39	0.98	-1.14
837	ENSDARG00000026726	anxa1a	2	-0.85	1.51	-0.61	0.53	-0.58	0.98	-0.03
846	ENSDARG00000075261	timp2b	2	-0.94	1.49	-0.7	0.51	-0.36	0.98	-0.34
2999	ENSDARG00000104458	rnasekb	16	1.45	0.56	-1.06	-0.42	-0.53	0.98	-0.53
5269	ENSDARG00000030156	naglu	22	1.59	0.02	0.1	-0.96	-0.75	0.98	0.85
5271	ENSDARG00000075325	mrpl16	22	1.62	-0.04	0.01	-1.02	-0.57	0.98	0.58
3636	ENSDARG00000032340	serhl	19	1.39	-0.14	0.57	-1.11	-0.7	0.97	1.27
5273	ENSDARG00000005840	got2b	22	1.59	-0.09	0.14	-1.06	-0.57	0.97	0.71
137	ENSDARG00000017121	mafba	1	-0.71	1.44	-1.1	0.47	-0.1	0.97	-1
147	ENSDARG00000098477	tec	1	-1.24	1.28	-0.76	0.31	0.4	0.97	-1.16
302	ENSDARG00000004635	epha7	1	-1.38	1.28	0.3	0.31	-0.51	0.97	0.81
920	ENSDARG00000020798	necap1	2	-0.71	1.46	-0.19	0.49	-1.05	0.97	0.86
996	ENSDARG00000098745	tfec	3	-1.26	1.21	-0.77	0.24	0.57	0.97	-1.34
2816	ENSDARG00000105433	zgc:172143	15	1.08	0.72	-0.05	-0.25	-1.5	0.97	1.45
3694	ENSDARG00000104696	apooa	19	1.49	0.03	0.31	-0.94	-0.89	0.97	1.2
4860	ENSDARG00000092124	cox14	22	1.44	-0.34	-0.08	-1.31	0.29	0.97	-0.37
314	ENSDARG00000015978	COX5B	1	-1.37	1.37	-0.21	0.41	-0.2	0.96	-0.01
183	ENSDARG00000098753	elmo1	1	-1.19	1.38	-0.71	0.42	0.1	0.96	-0.81
962	ENSDARG00000018529	lipf	3	-1.39	0.99	-0.52	0.03	0.9	0.96	-1.42
3553	ENSDARG00000024276	pcbp4	19	1.19	0.49	0.23	-0.47	-1.43	0.96	1.66
4616	ENSDARG00000032976	cmlc1	21	1.23	-0.34	0.75	-1.3	-0.33	0.96	1.08
4621	ENSDARG00000055708	timm8b	21	1.29	-0.33	0.67	-1.29	-0.34	0.96	1.01
4625	ENSDARG00000016260	fxr2	21	1.38	-0.31	0.52	-1.27	-0.32	0.96	0.84
4685	ENSDARG00000092954	mrpl34	21	1.48	-0.33	0.19	-1.29	-0.06	0.96	0.25
992	ENSDARG00000098899	zmp:0000001082	3	-1.26	1.13	-0.76	0.17	0.72	0.96	-1.48
440	ENSDARG00000052103	dtymk	1	-1.43	1.33	-0.21	0.38	-0.07	0.95	-0.14
1006	ENSDARG00000079252	fam117ab	3	-1.15	1.12	-0.9	0.17	0.76	0.95	-1.66
998	ENSDARG00000090730	cfbl	3	-1.17	1.06	-0.86	0.11	0.87	0.95	-1.73
1168	ENSDARG00000043976	etf1b	3	-1.46	0.8	-0.26	-0.15	1.07	0.95	-1.33
1448	ENSDARG00000051925	cyb5r2	3	-1.02	0.27	-0.12	-0.68	1.55	0.95	-1.67
4496	ENSDARG00000039929	ckmt2b	21	0.73	-0.4	1.21	-1.35	-0.18	0.95	1.39
4861	ENSDARG00000004724	tcea3	22	1.38	-0.35	-0.21	-1.3	0.48	0.95	-0.69
46	ENSDARG00000030053	eef1db	1	-0.76	1.23	0.51	0.28	-1.26	0.95	1.77
49	ENSDARG00000018179	acvrl1	1	-0.92	1.38	0.13	0.43	-1.02	0.95	1.15
849	ENSDARG00000008502	pno1	2	-0.92	1.47	-0.81	0.52	-0.25	0.95	-0.56
2609	ENSDARG00000044093	rpl13a	11	-0.16	-0.22	1.6	-1.17	-0.04	0.95	1.64
2858	ENSDARG00000099635	akap8l	16	1.26	0.76	-0.68	-0.19	-1.15	0.95	0.47
181	ENSDARG00000086703	si:dkey-126g1.7	1	-1.27	1.34	-0.65	0.4	0.18	0.94	-0.83
2627	ENSDARG00000074441	gp1bb	11	0.38	-0.14	1.5	-1.08	-0.65	0.94	2.15
2820	ENSDARG00000114870	CABZ01078594.1	15	0.85	0.66	0.39	-0.28	-1.62	0.94	2.01
3123	ENSDARG00000039887	c1qbp	16	1.66	0.05	-0.15	-0.89	-0.67	0.94	0.52
278	ENSDARG00000009594	nr1d2b	1	-1.58	0.96	-0.15	0.02	0.75	0.94	-0.9
339	ENSDARG00000019260	dhrs9	1	-1.1	1.44	-0.65	0.5	-0.19	0.94	-0.46
704	ENSDARG00000099728	zgc:56622	1	-0.69	1.5	-0.82	0.56	-0.55	0.94	-0.27
916	ENSDARG00000038040	tpk1	2	-0.55	1.5	-0.63	0.56	-0.86	0.94	0.23
1132	ENSDARG00000061120	slc43a2b	3	-1.19	0.86	-0.73	-0.08	1.14	0.94	-1.87
1655	ENSDARG00000055288	prelid3a	4	-1.59	0.84	-0.01	-0.1	0.87	0.94	-0.88
2801	ENSDARG00000100224	CABZ01074304.1	15	0.61	1	-0.04	0.06	-1.62	0.94	1.58
2854	ENSDARG00000014556	serpinb1l3	16	1.28	0.72	-0.54	-0.22	-1.23	0.94	0.69
3547	ENSDARG00000054220	ap4s1	19	1.05	0.36	0.6	-0.58	-1.44	0.94	2.04
3692	ENSDARG00000104049	crebl2	19	1.5	0.07	0.26	-0.87	-0.96	0.94	1.22
4512	ENSDARG00000056583	ndufs6	21	1.16	-0.47	0.65	-1.41	0.07	0.94	0.58
5270	ENSDARG00000017049	adsl	22	1.59	-0.02	0.11	-0.96	-0.72	0.94	0.83
2	ENSDARG00000053912	fbl	1	-1.63	1.11	0.28	0.18	0.07	0.93	0.21
2507	ENSDARG00000015862	rpl5b	9	-0.99	0.02	1.4	-0.91	0.48	0.93	0.92
2539	ENSDARG00000114577	si:dkey-159n16.2	9	0.18	0.16	1.49	-0.77	-1.06	0.93	2.55
2612	ENSDARG00000032725	rps27a	11	-0.51	-0.17	1.56	-1.1	0.22	0.93	1.34
2830	ENSDARG00000038123	myl9a	15	0.1	0.91	0.66	-0.02	-1.65	0.93	2.31
3106	ENSDARG00000102365	eloa	16	1.68	0.03	-0.29	-0.9	-0.53	0.93	0.24
4615	ENSDARG00000027984	gstz1	21	1.23	-0.38	0.73	-1.31	-0.27	0.93	1
5178	ENSDARG00000063344	fam162a	22	1.66	-0.12	-0.3	-1.05	-0.19	0.93	-0.11
138	ENSDARG00000042793	tpp1	1	-0.76	1.4	-1.12	0.47	0.01	0.93	-1.13
178	ENSDARG00000024204	mcm3	1	-1.24	1.39	-0.56	0.46	-0.04	0.93	-0.52
3000	ENSDARG00000075172	fbxo25	16	1.5	0.49	-1.03	-0.44	-0.51	0.93	-0.52
3139	ENSDARG00000033009	h3f3b.1	16	1.66	-0.03	-0.09	-0.96	-0.57	0.93	0.48
439	ENSDARG00000078975	igl1c3	1	-1.38	1.34	-0.36	0.42	-0.02	0.92	-0.34
966	ENSDARG00000029955	glb1l	3	-1.39	1.11	-0.58	0.19	0.68	0.92	-1.26
965	ENSDARG00000035326	nccrp1	3	-1.43	1.1	-0.51	0.18	0.67	0.92	-1.18
5286	ENSDARG00000030278	idh3a	22	1.58	-0.18	0.18	-1.1	-0.47	0.92	0.65
301	ENSDARG00000103775	thbs1a	1	-1.4	1.27	0.25	0.35	-0.49	0.92	0.74
441	ENSDARG00000074163	zgc:162879	1	-1.45	1.28	-0.31	0.36	0.13	0.92	-0.44
702	ENSDARG00000014017	rrm1	1	-0.82	1.49	-0.73	0.57	-0.51	0.92	-0.22
964	ENSDARG00000056367	mpv17l2	3	-1.41	1.04	-0.54	0.12	0.79	0.92	-1.33
3514	ENSDARG00000057392	lrrc31	19	0.91	0.15	0.97	-0.77	-1.27	0.92	2.24
3546	ENSDARG00000000103	myh10	19	1.23	0.28	0.47	-0.64	-1.34	0.92	1.81
171	ENSDARG00000057683	mcm6	1	-1.17	1.39	-0.7	0.47	0	0.92	-0.7
218	ENSDARG00000062460	sgk3	1	-1.49	1.16	-0.38	0.24	0.48	0.92	-0.86
296	ENSDARG00000024844	max	1	-1.54	1.23	0.08	0.31	-0.08	0.92	0.16
343	ENSDARG00000059070	gars	1	-1.11	1.44	-0.59	0.52	-0.27	0.92	-0.32
2771	ENSDARG00000101009	cited4b	15	0.44	1.18	-0.4	0.26	-1.48	0.92	1.08
4505	ENSDARG00000020610	tnnt2a	21	0.96	-0.46	0.97	-1.38	-0.09	0.92	1.06
4553	ENSDARG00000095675	ccdc141	21	1.15	-0.51	0.19	-1.43	0.59	0.92	-0.4
4626	ENSDARG00000053652	ndufaf6	21	1.39	-0.33	0.54	-1.25	-0.34	0.92	0.88
437	ENSDARG00000026322	dhrs13a.1	1	-1.34	1.32	-0.53	0.41	0.13	0.91	-0.66
5285	ENSDARG00000058208	slc25a26	22	1.58	-0.21	0.19	-1.12	-0.43	0.91	0.62
54	ENSDARG00000045487	rps16	1	-0.99	1.04	0.89	0.13	-1.06	0.91	1.95
917	ENSDARG00000102450	CU571328.1	2	-0.6	1.49	-0.7	0.58	-0.77	0.91	0.07
1005	ENSDARG00000094854	ms4a17a.9	3	-1.18	1.08	-0.88	0.17	0.8	0.91	-1.68
960	ENSDARG00000044613	c1qa	3	-1.44	0.99	-0.48	0.08	0.85	0.91	-1.33
3524	ENSDARG00000059236	ptger4a	19	0.53	0.04	1.36	-0.87	-1.06	0.91	2.42
3610	ENSDARG00000097011	hbaa1	19	1.24	-0.02	0.74	-0.93	-1.03	0.91	1.77
4495	ENSDARG00000012409	rnf207b	21	0.76	-0.4	1.22	-1.31	-0.27	0.91	1.49
310	ENSDARG00000016691	cd9b	1	-1.29	1.39	-0.3	0.48	-0.27	0.91	-0.03
311	ENSDARG00000046030	zgc:110339	1	-1.27	1.4	-0.24	0.49	-0.38	0.91	0.14
334	ENSDARG00000069044	agpat4	1	-1.16	1.42	-0.58	0.51	-0.18	0.91	-0.4
847	ENSDARG00000077620	cdca7a	2	-0.99	1.46	-0.7	0.55	-0.32	0.91	-0.38
1017	ENSDARG00000022315	atp6v1g1	3	-0.79	1.14	-1.25	0.23	0.67	0.91	-1.92
1392	ENSDARG00000055118	mylipb	3	-1.39	0.5	0.02	-0.41	1.28	0.91	-1.26
4559	ENSDARG00000071396	timm23a	21	0.95	-0.53	0.84	-1.44	0.18	0.91	0.66
304	ENSDARG00000088116	gstm.3	1	-1.3	1.3	0.24	0.4	-0.64	0.9	0.88
961	ENSDARG00000044612	c1qb	3	-1.44	1.01	-0.49	0.11	0.81	0.9	-1.3
1101	ENSDARG00000013968	psap	3	-1.33	0.89	-0.6	-0.01	1.04	0.9	-1.64
1099	ENSDARG00000079826	gpr174	3	-1.37	0.8	-0.45	-0.1	1.12	0.9	-1.57
1391	ENSDARG00000062811	p2ry10	3	-1.32	0.52	-0.17	-0.38	1.35	0.9	-1.52
2501	ENSDARG00000057167	eif4g2b	9	-0.89	0.03	1.56	-0.87	0.17	0.9	1.39
3526	ENSDARG00000037539	tnnc1b	19	0.66	0.11	1.22	-0.79	-1.2	0.9	2.42
3543	ENSDARG00000058322	enc3	19	0.76	0.5	0.72	-0.4	-1.58	0.9	2.3
3711	ENSDARG00000008706	paip2b	19	1.42	-0.09	0.51	-0.99	-0.85	0.9	1.36
3	ENSDARG00000040985	itgbl1	1	-1.6	1.15	0.25	0.25	-0.05	0.9	0.3
342	ENSDARG00000068175	ing5b	1	-1.09	1.44	-0.59	0.54	-0.31	0.9	-0.28
344	ENSDARG00000041085	arpin	1	-1.24	1.4	-0.43	0.5	-0.22	0.9	-0.21
993	ENSDARG00000059294	marco	3	-1.29	1.17	-0.73	0.27	0.59	0.9	-1.32
1126	ENSDARG00000074851	s1pr4	3	-1.15	0.97	-0.88	0.07	0.98	0.9	-1.86
3517	ENSDARG00000089829	si:ch211-189a21.1	19	0.84	0.08	1.09	-0.82	-1.2	0.9	2.29
3702	ENSDARG00000099039	pcbp2	19	1.55	0.07	0.15	-0.83	-0.94	0.9	1.09
306	ENSDARG00000005908	clk4b	1	-1.24	1.36	0.02	0.47	-0.62	0.89	0.64
1008	ENSDARG00000089894	zmp:0000001289	3	-1.07	1.1	-1	0.21	0.77	0.89	-1.77
2611	ENSDARG00000037071	rps26	11	-0.35	-0.18	1.64	-1.07	-0.03	0.89	1.67
4498	ENSDARG00000053483	zgc:113054	21	1.02	-0.42	0.99	-1.31	-0.27	0.89	1.26
4518	ENSDARG00000029064	uqcrq	21	1.1	-0.47	0.84	-1.36	-0.11	0.89	0.95
4675	ENSDARG00000006290	ndufs5	21	1.33	-0.41	0.58	-1.3	-0.2	0.89	0.78
5	ENSDARG00000037425	s100a10a	1	-1.67	1.02	0.25	0.13	0.27	0.89	-0.02
116	ENSDARG00000044982	dhrs3a	1	-1.11	1.28	-0.92	0.39	0.36	0.89	-1.28
279	ENSDARG00000013082	uap1l1	1	-1.58	0.91	-0.15	0.02	0.8	0.89	-0.95
1134	ENSDARG00000097901	si:ch73-90p23.1	3	-1.12	0.78	-0.78	-0.11	1.23	0.89	-2.01
2814	ENSDARG00000058127	hcfc2	15	1.19	0.61	-0.05	-0.28	-1.46	0.89	1.41
3114	ENSDARG00000099908	MTFP1	16	1.69	0.08	-0.5	-0.81	-0.46	0.89	-0.04
3518	ENSDARG00000031164	tuba8l2	19	0.87	0.03	1.1	-0.86	-1.14	0.89	2.24
3699	ENSDARG00000087456	NDUFB1	19	1.61	0.04	0.04	-0.85	-0.83	0.89	0.87
4529	ENSDARG00000014313	atp5pf	21	1.16	-0.39	0.86	-1.28	-0.36	0.89	1.22
4530	ENSDARG00000057910	mrps34	21	1.16	-0.36	0.88	-1.25	-0.43	0.89	1.31
4622	ENSDARG00000089836	MRPS12	21	1.33	-0.39	0.61	-1.28	-0.26	0.89	0.87
4624	ENSDARG00000058041	ndufa8	21	1.3	-0.39	0.66	-1.28	-0.28	0.89	0.94
4674	ENSDARG00000069624	mrps18c	21	1.39	-0.4	0.48	-1.29	-0.17	0.89	0.65
972	ENSDARG00000026017	xpnpep2	3	-1.4	1.17	-0.57	0.28	0.52	0.89	-1.09
3657	ENSDARG00000056008	atp5mc1	19	1.42	-0.27	0.55	-1.16	-0.54	0.89	1.09
438	ENSDARG00000045066	entpd1	1	-1.38	1.33	-0.38	0.45	-0.02	0.88	-0.36
991	ENSDARG00000056874	lygl1	3	-1.23	1.12	-0.83	0.24	0.7	0.88	-1.53
3004	ENSDARG00000103264	si:dkey-25g12.4	16	1.61	0.33	-0.85	-0.55	-0.54	0.88	-0.31
4435	ENSDARG00000071498	fhl1a	21	0.42	-0.43	1.39	-1.31	-0.08	0.88	1.47
4497	ENSDARG00000031098	timm50	21	1	-0.41	1.03	-1.29	-0.33	0.88	1.36
4517	ENSDARG00000041314	ndufb9	21	1.09	-0.48	0.86	-1.36	-0.11	0.88	0.97
51	ENSDARG00000071555	zgc:153675	1	-0.92	1.24	0.45	0.36	-1.14	0.88	1.59
115	ENSDARG00000054543	samsn1a	1	-1.17	1.28	-0.85	0.4	0.34	0.88	-1.19
963	ENSDARG00000068784	vsir	3	-1.39	1.04	-0.59	0.16	0.78	0.88	-1.37
1007	ENSDARG00000094210	fthl31	3	-1.1	1.04	-0.96	0.16	0.86	0.88	-1.82
1167	ENSDARG00000095627	c1qc	3	-1.51	0.8	-0.23	-0.08	1.01	0.88	-1.24
1385	ENSDARG00000036479	si:dkeyp-80c12.4	3	-1.29	0.64	-0.4	-0.24	1.3	0.88	-1.7
1670	ENSDARG00000093954	si:dkey-9i23.16	4	-1.66	0.65	0.68	-0.23	0.56	0.88	0.12
2802	ENSDARG00000032272	sat1b	15	0.63	0.99	-0.13	0.11	-1.61	0.88	1.48
3706	ENSDARG00000057928	mzt2b	19	1.36	0.01	0.54	-0.87	-1.05	0.88	1.59
3709	ENSDARG00000041022	pdcd4b	19	1.46	-0.01	0.39	-0.89	-0.96	0.88	1.35
5265	ENSDARG00000007405	strap	22	1.56	-0.09	0.24	-0.97	-0.74	0.88	0.98
319	ENSDARG00000023002	dtl	1	-1.09	1.44	-0.48	0.56	-0.44	0.88	-0.04
994	ENSDARG00000057853	atp6v0ca	3	-1.25	1.16	-0.81	0.28	0.62	0.88	-1.43
2037	ENSDARG00000037870	actb2	6	-1.43	0.29	0.76	-0.59	0.97	0.88	-0.21
4862	ENSDARG00000099420	nme2b.2	22	1.41	-0.41	-0.14	-1.28	0.42	0.87	-0.56
703	ENSDARG00000079932	zgc:152830	1	-0.79	1.47	-0.77	0.6	-0.52	0.87	-0.25
2038	ENSDARG00000104043	gng10	6	-1.39	0.26	0.62	-0.61	1.12	0.87	-0.5
2803	ENSDARG00000074572	zgc:56304	15	0.79	1	-0.44	0.13	-1.47	0.87	1.03
2867	ENSDARG00000070486	rbp7b	16	1.51	0.5	-0.75	-0.37	-0.88	0.87	0.13
3697	ENSDARG00000071353	si:ch211-235e9.8	19	1.56	-0.01	0.19	-0.88	-0.86	0.87	1.05
340	ENSDARG00000098929	tex15	1	-1.13	1.41	-0.65	0.54	-0.17	0.87	-0.48
904	ENSDARG00000007614	wwox	2	-0.89	1.43	-0.22	0.56	-0.88	0.87	0.66
2608	ENSDARG00000100392	rps18	11	-0.19	-0.34	1.53	-1.21	0.2	0.87	1.33
3656	ENSDARG00000017571	mccc2	19	1.38	-0.28	0.6	-1.15	-0.56	0.87	1.16
117	ENSDARG00000031534	CU571315.1	1	-1.16	1.31	-0.84	0.45	0.24	0.86	-1.08
2039	ENSDARG00000007788	atp2b1b	6	-1.34	0.2	0.66	-0.66	1.14	0.86	-0.48
2795	ENSDARG00000103766	cyp2aa7	15	-0.13	1.31	-0.21	0.45	-1.42	0.86	1.21
3700	ENSDARG00000101540	fgf3	19	1.57	0.05	0.12	-0.81	-0.93	0.86	1.05
4519	ENSDARG00000014506	tmem126a	21	1.13	-0.47	0.83	-1.33	-0.17	0.86	1
5190	ENSDARG00000089921	smim4	22	1.64	-0.23	-0.13	-1.09	-0.19	0.86	0.06
277	ENSDARG00000054837	zgc:136870	1	-1.51	0.97	-0.36	0.11	0.8	0.86	-1.16
850	ENSDARG00000093248	si:dkey-238m4.4	2	-0.92	1.44	-0.82	0.58	-0.28	0.86	-0.54
2492	ENSDARG00000043484	ube2d2	9	-1.49	0.36	0.99	-0.5	0.65	0.86	0.34
2772	ENSDARG00000093931	rflnb	15	0.21	1.25	-0.4	0.39	-1.44	0.86	1.04
3029	ENSDARG00000018985	castor2	16	1.66	0.11	-0.22	-0.75	-0.79	0.86	0.57
3703	ENSDARG00000042535	actc1a	19	1.57	0.02	0.14	-0.84	-0.9	0.86	1.04
3712	ENSDARG00000045367	tuba1b	19	1.43	-0.08	0.49	-0.94	-0.9	0.86	1.39
5274	ENSDARG00000038028	ndufa6	22	1.62	-0.14	0.09	-1	-0.58	0.86	0.67
317	ENSDARG00000010925	HTRA3	1	-1.23	1.4	-0.29	0.54	-0.42	0.86	0.13
318	ENSDARG00000053091	si:ch211-204c21.1	1	-1.14	1.42	-0.36	0.56	-0.48	0.86	0.12
335	ENSDARG00000030441	ppa1b	1	-1.21	1.39	-0.53	0.53	-0.19	0.86	-0.34
3655	ENSDARG00000070922	cnbpb	19	1.39	-0.29	0.6	-1.15	-0.55	0.86	1.15
4558	ENSDARG00000101222	oscp1a	21	1.02	-0.56	0.78	-1.42	0.18	0.86	0.6
1004	ENSDARG00000042722	blnk	3	-1.16	1.06	-0.92	0.21	0.8	0.85	-1.72
3550	ENSDARG00000034093	dclk2a	19	0.95	0.32	0.73	-0.53	-1.48	0.85	2.21
4494	ENSDARG00000045947	hrc	21	0.81	-0.43	1.2	-1.28	-0.29	0.85	1.49
4623	ENSDARG00000042848	pcmtl	21	1.32	-0.41	0.65	-1.26	-0.3	0.85	0.95
4698	ENSDARG00000043457	gapdh	21	1.48	-0.42	0.19	-1.27	0.03	0.85	0.16
5288	ENSDARG00000104173	tufm	22	1.58	-0.24	0.21	-1.09	-0.45	0.85	0.66
320	ENSDARG00000101481	rbp5	1	-1.1	1.43	-0.46	0.58	-0.45	0.85	-0.01
2496	ENSDARG00000036629	rps14	9	-1.12	0.12	1.46	-0.73	0.27	0.85	1.19
2773	ENSDARG00000020850	eef1a1l2	15	0.36	1.25	-0.76	0.4	-1.25	0.85	0.49
3115	ENSDARG00000019644	ldhba	16	1.69	0.1	-0.67	-0.75	-0.36	0.85	-0.31
3122	ENSDARG00000010862	amt	16	1.68	0.02	-0.18	-0.83	-0.68	0.85	0.5
4627	ENSDARG00000101631	etfa	21	1.4	-0.37	0.54	-1.22	-0.36	0.85	0.9
4688	ENSDARG00000023583	coq9	21	1.5	-0.37	0.28	-1.22	-0.2	0.85	0.48
3653	ENSDARG00000078500	dap3	19	1.35	-0.29	0.67	-1.14	-0.59	0.85	1.26
4513	ENSDARG00000029100	chchd1	21	1.1	-0.54	0.74	-1.39	0.1	0.85	0.64
177	ENSDARG00000001767	slc29a2	1	-1.02	1.35	-0.93	0.51	0.08	0.84	-1.01
179	ENSDARG00000019302	mid1ip1b	1	-1.24	1.35	-0.61	0.51	-0.02	0.84	-0.59
1135	ENSDARG00000087152	sowahd	3	-1.12	0.8	-0.82	-0.04	1.19	0.84	-2.01
2848	ENSDARG00000061747	dipk2b	16	1.41	0.52	-0.38	-0.32	-1.23	0.84	0.85
2865	ENSDARG00000053792	si:rp71-1g18.1	16	1.51	0.4	-0.35	-0.44	-1.12	0.84	0.77
3585	ENSDARG00000028815	zgc:162945	19	1.47	0.32	-0.06	-0.52	-1.21	0.84	1.15
3681	ENSDARG00000034957	hddc2	19	1.46	0.19	0.16	-0.65	-1.17	0.84	1.33
3682	ENSDARG00000071876	rell2	19	1.44	0.2	0.2	-0.64	-1.2	0.84	1.4
3701	ENSDARG00000088881	si:dkeyp-69b9.3	19	1.59	0.04	0.08	-0.8	-0.91	0.84	0.99
4614	ENSDARG00000041599	zgc:91860	21	1.26	-0.43	0.73	-1.27	-0.3	0.84	1.03
728	ENSDARG00000099371	cygb1	1	-0.86	1.46	-0.54	0.62	-0.67	0.84	0.13
1025	ENSDARG00000013750	eno1b	3	-1.35	0.98	-0.65	0.14	0.88	0.84	-1.53
1027	ENSDARG00000055713	fmnl1a	3	-1.28	0.98	-0.74	0.14	0.91	0.84	-1.65
3548	ENSDARG00000013777	ppp1r13l	19	1.06	0.35	0.56	-0.49	-1.49	0.84	2.05
3631	ENSDARG00000069966	alox5b.3	19	1.29	-0.13	0.72	-0.97	-0.92	0.84	1.64
3695	ENSDARG00000016307	mrpl46	19	1.52	-0.01	0.29	-0.85	-0.94	0.84	1.23
12	ENSDARG00000097691	pclaf	1	-1.58	1.12	0.35	0.29	-0.18	0.83	0.53
300	ENSDARG00000093052	c6	1	-1.42	1.28	0.05	0.45	-0.37	0.83	0.42
2494	ENSDARG00000005842	cd9a	9	-1.2	0.05	1.17	-0.78	0.76	0.83	0.41
2817	ENSDARG00000039483	si:dkey-51a16.9	15	1.1	0.49	0.29	-0.34	-1.53	0.83	1.82
2819	ENSDARG00000061923	amotl2a	15	0.98	0.49	0.45	-0.34	-1.58	0.83	2.03
2864	ENSDARG00000040890	fdps	16	1.52	0.39	-0.36	-0.44	-1.11	0.83	0.75
3671	ENSDARG00000040741	kcnab1b	19	1.5	0.2	0.09	-0.63	-1.15	0.83	1.24
4500	ENSDARG00000069855	pnisr	21	0.9	-0.41	1.15	-1.24	-0.4	0.83	1.55
4516	ENSDARG00000032970	cox4i1	21	1.2	-0.5	0.74	-1.33	-0.11	0.83	0.85
4668	ENSDARG00000098355	atp5pd	21	1.26	-0.51	0.61	-1.34	-0.02	0.83	0.63
321	ENSDARG00000002613	rpa3	1	-1.16	1.41	-0.43	0.58	-0.39	0.83	-0.04
700	ENSDARG00000043720	cdc45	1	-0.72	1.46	-0.66	0.63	-0.71	0.83	0.05
1023	ENSDARG00000005821	ncf2	3	-1.37	0.98	-0.62	0.15	0.87	0.83	-1.49
1437	ENSDARG00000097065	si:ch73-223p23.2	3	-0.72	0.24	-0.59	-0.59	1.65	0.83	-2.24
4617	ENSDARG00000041350	ankrd39	21	1.37	-0.36	0.61	-1.19	-0.43	0.83	1.04
3658	ENSDARG00000070824	ndufb5	19	1.41	-0.33	0.56	-1.16	-0.48	0.83	1.04
1098	ENSDARG00000060860	pstpip1a	3	-1.33	0.76	-0.54	-0.06	1.17	0.82	-1.71
1654	ENSDARG00000016484	dkc1	4	-1.6	0.77	-0.05	-0.05	0.92	0.82	-0.97
2863	ENSDARG00000086302	proser1	16	1.51	0.42	-0.43	-0.4	-1.09	0.82	0.66
3016	ENSDARG00000008014	nudt17	16	1.57	0.37	-0.55	-0.45	-0.94	0.82	0.39
3696	ENSDARG00000025436	msrb1a	19	1.52	0.01	0.26	-0.81	-0.98	0.82	1.24
3717	ENSDARG00000028889	ndufb10	19	1.49	-0.19	0.44	-1.01	-0.73	0.82	1.17
5281	ENSDARG00000069321	fam169b	22	1.55	-0.27	0.31	-1.09	-0.5	0.82	0.81
5282	ENSDARG00000020618	gatd3a	22	1.54	-0.29	0.32	-1.11	-0.46	0.82	0.78
282	ENSDARG00000023394	slc37a2	1	-1.58	0.96	-0.22	0.14	0.71	0.82	-0.93
333	ENSDARG00000040041	mcm4	1	-1.14	1.4	-0.6	0.58	-0.24	0.82	-0.36
666	ENSDARG00000058734	prdx1	1	-1.01	1.41	-0.77	0.59	-0.22	0.82	-0.55
858	ENSDARG00000068431	si:ch211-195h23.3	2	-0.75	1.44	-0.9	0.62	-0.41	0.82	-0.49
1026	ENSDARG00000061272	BX294434.1	3	-1.33	0.95	-0.68	0.13	0.93	0.82	-1.61
1653	ENSDARG00000007216	abce1	4	-1.66	0.73	0.22	-0.09	0.81	0.82	-0.59
2815	ENSDARG00000058345	si:dkey-5i3.5	15	1.17	0.59	-0.04	-0.23	-1.49	0.82	1.45
3606	ENSDARG00000010878	cdkn1ca	19	1.14	-0.15	0.92	-0.97	-0.94	0.82	1.86
3716	ENSDARG00000044753	idh3b	19	1.49	-0.15	0.43	-0.97	-0.81	0.82	1.24
4618	ENSDARG00000101622	mrps7	21	1.39	-0.38	0.58	-1.2	-0.39	0.82	0.97
4687	ENSDARG00000088383	cox5aa	21	1.52	-0.37	0.3	-1.19	-0.26	0.82	0.56
276	ENSDARG00000108340	si:ch211-283g2.2	1	-1.54	0.89	-0.3	0.08	0.87	0.81	-1.17
1667	ENSDARG00000054272	caprin1b	4	-1.71	0.75	0.47	-0.06	0.55	0.81	-0.08
2862	ENSDARG00000045257	decr2	16	1.44	0.52	-0.54	-0.29	-1.13	0.81	0.59
2866	ENSDARG00000021172	cyp2ad2	16	1.52	0.45	-0.65	-0.36	-0.97	0.81	0.32
4528	ENSDARG00000101706	csrp3	21	1.13	-0.42	0.93	-1.23	-0.42	0.81	1.35
4628	ENSDARG00000017537	prkag3a	21	1.46	-0.41	0.41	-1.22	-0.24	0.81	0.65
859	ENSDARG00000023584	cdc7	2	-0.82	1.42	-0.92	0.61	-0.28	0.81	-0.64
3715	ENSDARG00000014554	ppp1r3cb	19	1.48	-0.16	0.44	-0.97	-0.8	0.81	1.24
4619	ENSDARG00000045490	ndufb2	21	1.39	-0.38	0.59	-1.19	-0.41	0.81	1
4629	ENSDARG00000061621	them4	21	1.47	-0.37	0.44	-1.18	-0.36	0.81	0.8
10	ENSDARG00000094752	rpe65b	1	-1.52	1.09	0.52	0.29	-0.39	0.8	0.91
172	ENSDARG00000053010	lpcat2	1	-1.11	1.35	-0.79	0.55	0	0.8	-0.79
173	ENSDARG00000102249	pepd	1	-1.17	1.32	-0.78	0.52	0.1	0.8	-0.88
287	ENSDARG00000014817	ranbp1	1	-1.68	0.9	0.09	0.1	0.59	0.8	-0.5
1022	ENSDARG00000062349	arhgap15	3	-1.3	1.02	-0.75	0.22	0.81	0.8	-1.56
1125	ENSDARG00000006019	tktb	3	-1.16	0.91	-0.87	0.11	1.02	0.8	-1.89
2530	ENSDARG00000037789	pvalb1	9	-0.77	0.52	1.48	-0.28	-0.94	0.8	2.42
2769	ENSDARG00000007804	gas6	15	0.05	1.34	-0.76	0.54	-1.16	0.8	0.4
2832	ENSDARG00000051783	rplp0	15	0.18	0.92	0.48	0.12	-1.7	0.8	2.18
2847	ENSDARG00000031202	alg11	16	1.37	0.55	-0.4	-0.25	-1.27	0.8	0.87
3010	ENSDARG00000035569	cyp1d1	16	1.61	0.26	-0.36	-0.54	-0.97	0.8	0.61
3028	ENSDARG00000068176	uqcc1	16	1.65	0.15	-0.28	-0.65	-0.86	0.8	0.58
3707	ENSDARG00000017316	bag5	19	1.43	0.02	0.41	-0.78	-1.08	0.8	1.49
670	ENSDARG00000095807	hp	1	-1	1.43	-0.6	0.63	-0.46	0.8	-0.14
772	ENSDARG00000100990	nme3	1	-0.65	1.43	-0.45	0.63	-0.96	0.8	0.51
940	ENSDARG00000045417	fam49bb	3	-1.27	1.18	-0.79	0.38	0.49	0.8	-1.28
1024	ENSDARG00000077918	dnase2b	3	-1.38	0.97	-0.62	0.17	0.86	0.8	-1.48
3654	ENSDARG00000060594	hadhab	19	1.31	-0.37	0.73	-1.17	-0.5	0.8	1.23
3710	ENSDARG00000102012	ppp1cbl	19	1.48	-0.02	0.35	-0.82	-1	0.8	1.35
50	ENSDARG00000000002	ccdc80	1	-1.04	1.23	0.39	0.44	-1.02	0.79	1.41
971	ENSDARG00000026350	wasb	3	-1.42	1.11	-0.58	0.32	0.57	0.79	-1.15
3137	ENSDARG00000030781	acads	16	1.65	-0.18	0.04	-0.97	-0.54	0.79	0.58
3559	ENSDARG00000103619	si:ch73-238c9.1	19	0.78	0.28	0.92	-0.51	-1.48	0.79	2.4
3673	ENSDARG00000019293	tfdp1a	19	1.53	0.15	0.07	-0.64	-1.1	0.79	1.17
4430	ENSDARG00000055475	rps27.2	21	0.11	-0.53	1.35	-1.32	0.38	0.79	0.97
5279	ENSDARG00000038881	acaa2	22	1.5	-0.31	0.43	-1.1	-0.51	0.79	0.94
5287	ENSDARG00000039493	naa20	22	1.59	-0.28	0.22	-1.07	-0.46	0.79	0.68
4	ENSDARG00000018961	gtpbp4	1	-1.69	0.96	0.44	0.17	0.11	0.79	0.33
316	ENSDARG00000041323	csdc2a	1	-1.2	1.38	-0.3	0.59	-0.47	0.79	0.17
3714	ENSDARG00000116835	park7	19	1.52	-0.15	0.37	-0.94	-0.8	0.79	1.17
4546	ENSDARG00000004672	ptk2ab	21	0.84	-0.35	1.24	-1.14	-0.59	0.79	1.83
4554	ENSDARG00000070985	mrps21	21	1.19	-0.59	0.29	-1.38	0.5	0.79	-0.21
323	ENSDARG00000004311	ldlrap1a	1	-1.22	1.36	-0.19	0.58	-0.53	0.78	0.34
4514	ENSDARG00000019332	ndufb4	21	1.1	-0.57	0.79	-1.35	0.03	0.78	0.76
283	ENSDARG00000055120	ctsba	1	-1.63	0.98	-0.11	0.2	0.56	0.78	-0.67
967	ENSDARG00000075748	NCKAP1L	3	-1.49	1.01	-0.47	0.23	0.71	0.78	-1.18
1124	ENSDARG00000114387	CU499336.2	3	-1.15	0.93	-0.91	0.15	0.98	0.78	-1.89
1160	ENSDARG00000100835	RGS13 (1 of many)	3	-1.14	0.63	-0.68	-0.15	1.34	0.78	-2.02
2849	ENSDARG00000035771	MEPCE	16	1.35	0.53	-0.31	-0.25	-1.32	0.78	1.01
3022	ENSDARG00000045444	fzd8a	16	1.61	0.13	-0.13	-0.65	-0.97	0.78	0.84
3138	ENSDARG00000021702	pdcd4a	16	1.68	-0.13	-0.07	-0.91	-0.57	0.78	0.5
3545	ENSDARG00000053868	etv2	19	1.21	0.16	0.59	-0.62	-1.34	0.78	1.93
3644	ENSDARG00000034470	aldoab	19	1.37	-0.25	0.65	-1.03	-0.75	0.78	1.4
3672	ENSDARG00000062138	ranbp10	19	1.53	0.18	0.02	-0.6	-1.13	0.78	1.15
4686	ENSDARG00000076891	rfxap	21	1.5	-0.41	0.32	-1.19	-0.23	0.78	0.55
4691	ENSDARG00000103101	si:ch211-235e9.6	21	1.42	-0.48	0.4	-1.26	-0.07	0.78	0.47
857	ENSDARG00000043802	ms4a17a.8	2	-0.8	1.42	-0.89	0.64	-0.37	0.78	-0.52
2794	ENSDARG00000031783	adcy8	15	-0.32	1.17	0.27	0.39	-1.51	0.78	1.78
3120	ENSDARG00000003934	nxnl2	16	1.7	0.08	-0.41	-0.7	-0.67	0.78	0.26
322	ENSDARG00000015111	ddx39ab	1	-1.24	1.34	-0.08	0.57	-0.58	0.77	0.5
4576	ENSDARG00000009447	atp5mc3b	21	1.18	-0.59	0.65	-1.36	0.12	0.77	0.53
436	ENSDARG00000031435	TXN	1	-1.32	1.29	-0.56	0.52	0.07	0.77	-0.63
1009	ENSDARG00000099519	zgc:66475	3	-1.15	1.09	-0.96	0.32	0.7	0.77	-1.66
1386	ENSDARG00000004906	stip1	3	-1.39	0.62	-0.32	-0.15	1.24	0.77	-1.56
1433	ENSDARG00000093465	si:ch73-7i4.3	3	-1.13	0.41	-0.43	-0.36	1.5	0.77	-1.93
1668	ENSDARG00000100387	si:dkey-78o7.3	4	-1.63	0.49	0.79	-0.28	0.63	0.77	0.16
2577	ENSDARG00000099309	si:zfos-169g10.3	11	-0.17	-0.12	1.7	-0.89	-0.52	0.77	2.22
3011	ENSDARG00000059150	tmem107	16	1.63	0.24	-0.45	-0.53	-0.9	0.77	0.45
3136	ENSDARG00000045351	ccdc58	16	1.66	-0.21	0.02	-0.98	-0.49	0.77	0.51
3698	ENSDARG00000039299	rdh14a	19	1.62	0.01	0.02	-0.76	-0.89	0.77	0.91
4544	ENSDARG00000091101	fabp10b	21	1.01	-0.27	1.09	-1.04	-0.79	0.77	1.88
5259	ENSDARG00000078894	hemk1	22	1.64	-0.15	0.09	-0.92	-0.66	0.77	0.75
5266	ENSDARG00000057571	pgam2	22	1.58	-0.18	0.26	-0.95	-0.71	0.77	0.97
699	ENSDARG00000079296	gcga	1	-0.71	1.44	-0.7	0.67	-0.7	0.77	0
902	ENSDARG00000104765	chek1	2	-0.96	1.41	-0.33	0.64	-0.76	0.77	0.43
4570	ENSDARG00000041400	ndufa3	21	1	-0.63	0.77	-1.4	0.27	0.77	0.5
657	ENSDARG00000078050	phf19	1	-0.97	1.37	-0.9	0.61	-0.1	0.76	-0.8
4436	ENSDARG00000054191	pgk1	21	0.42	-0.57	1.31	-1.33	0.17	0.76	1.14
303	ENSDARG00000059357	sarnp	1	-1.4	1.21	0.27	0.45	-0.54	0.76	0.81
1133	ENSDARG00000079325	CABZ01046432.1	3	-1.23	0.79	-0.74	0.03	1.15	0.76	-1.89
1384	ENSDARG00000054911	tmsb	3	-1.33	0.68	-0.5	-0.08	1.23	0.76	-1.73
2247	ENSDARG00000054847	xcr1a.1	6	-0.55	-0.14	-0.1	-0.9	1.69	0.76	-1.79
2462	ENSDARG00000027590	sept2	9	-1.31	0.55	1.34	-0.21	-0.37	0.76	1.71
2493	ENSDARG00000101041	ccl39.1	9	-1.22	0.05	1.29	-0.71	0.59	0.76	0.7
2859	ENSDARG00000045297	phb2a	16	1.2	0.73	-0.61	-0.03	-1.29	0.76	0.68
2861	ENSDARG00000035596	ISCU (1 of many)	16	1.28	0.67	-0.65	-0.09	-1.22	0.76	0.57
3124	ENSDARG00000052833	zfand3	16	1.67	-0.03	-0.07	-0.79	-0.77	0.76	0.7
3529	ENSDARG00000058824	mrpl4	19	0.84	-0.23	1.24	-0.99	-0.86	0.76	2.1
3604	ENSDARG00000071361	si:ch211-197g15.10	19	1.05	-0.12	1	-0.88	-1.05	0.76	2.05
4633	ENSDARG00000007526	ndufs2	21	1.41	-0.44	0.54	-1.2	-0.31	0.76	0.85
5176	ENSDARG00000069440	dachd	22	1.71	-0.17	-0.26	-0.93	-0.36	0.76	0.1
5268	ENSDARG00000110836	tmem14ca	22	1.61	-0.14	0.18	-0.9	-0.75	0.76	0.93
5280	ENSDARG00000054907	cox7a2l	22	1.47	-0.33	0.48	-1.09	-0.54	0.76	1.02
727	ENSDARG00000042708	tuba8l	1	-0.95	1.42	-0.55	0.66	-0.58	0.76	0.03
3659	ENSDARG00000102055	hadhb	19	1.43	-0.38	0.55	-1.14	-0.45	0.76	1
4428	ENSDARG00000101406	rplp2	21	0.56	-0.66	0.95	-1.42	0.58	0.76	0.37
4439	ENSDARG00000096346	si:ch211-85n16.3	21	0.8	-0.59	1.1	-1.34	0.03	0.75	1.07
970	ENSDARG00000101785	laptm5	3	-1.37	1.09	-0.67	0.34	0.61	0.75	-1.28
1436	ENSDARG00000099068	si:ch211-147m6.3	3	-0.83	0.39	-0.77	-0.36	1.56	0.75	-2.33
2463	ENSDARG00000018145	mid1ip1l	9	-1.26	0.75	1.18	0	-0.67	0.75	1.85
2491	ENSDARG00000104011	rps17	9	-1.38	0.21	1.25	-0.54	0.46	0.75	0.79
2736	ENSDARG00000074111	bcdin3d	14	0.76	0.97	-1.48	0.22	-0.48	0.75	-1
3012	ENSDARG00000054164	mrps17	16	1.62	0.25	-0.42	-0.5	-0.94	0.75	0.52
3021	ENSDARG00000062209	mrps5	16	1.65	0.09	-0.18	-0.66	-0.9	0.75	0.72
4431	ENSDARG00000033201	zgc:101840	21	-0.05	-0.56	1.22	-1.31	0.7	0.75	0.52
4632	ENSDARG00000025549	ndufaf1	21	1.43	-0.44	0.5	-1.19	-0.29	0.75	0.79
4676	ENSDARG00000013044	ndufv2	21	1.39	-0.48	0.53	-1.23	-0.21	0.75	0.74
5193	ENSDARG00000005359	sucla2	22	1.67	-0.24	-0.02	-0.99	-0.42	0.75	0.4
5308	ENSDARG00000042644	sod2	22	1.56	-0.24	0.31	-0.99	-0.65	0.75	0.96
723	ENSDARG00000078659	tmem176	1	-1.09	1.39	-0.32	0.64	-0.61	0.75	0.29
135	ENSDARG00000037892	psmc3ip	1	-0.85	1.33	-1.08	0.59	0	0.74	-1.08
664	ENSDARG00000038682	zgc:171687	1	-1.08	1.37	-0.7	0.63	-0.22	0.74	-0.48
284	ENSDARG00000009160	kmo	1	-1.61	0.99	-0.2	0.25	0.57	0.74	-0.77
1011	ENSDARG00000075818	dok2	3	-1.22	1.04	-0.88	0.3	0.75	0.74	-1.63
3003	ENSDARG00000104758	zgc:194981	16	1.61	0.16	-1	-0.58	-0.19	0.74	-0.81
3632	ENSDARG00000097339	slc9a1b	19	1.27	-0.23	0.8	-0.97	-0.87	0.74	1.67
4669	ENSDARG00000011841	atp5l	21	1.32	-0.54	0.58	-1.28	-0.08	0.74	0.66
4833	ENSDARG00000073910	cinp	22	1.64	-0.18	-0.65	-0.92	0.1	0.74	-0.75
5264	ENSDARG00000068886	mrpl14	22	1.64	-0.22	0.13	-0.96	-0.58	0.74	0.71
5306	ENSDARG00000041570	mrpl39	22	1.55	-0.28	0.36	-1.02	-0.6	0.74	0.96
658	ENSDARG00000098602	CABZ01001434.1	1	-0.94	1.39	-0.84	0.65	-0.26	0.74	-0.58
667	ENSDARG00000059693	adam19a	1	-1.04	1.38	-0.74	0.64	-0.24	0.74	-0.5
903	ENSDARG00000093440	tnfaip6	2	-0.91	1.4	-0.32	0.66	-0.82	0.74	0.5
332	ENSDARG00000053530	cyp4f3	1	-1.16	1.36	-0.6	0.63	-0.23	0.73	-0.37
337	ENSDARG00000100558	slbp	1	-1.22	1.35	-0.46	0.62	-0.3	0.73	-0.16
665	ENSDARG00000052721	prim2	1	-1.09	1.36	-0.73	0.63	-0.17	0.73	-0.56
5189	ENSDARG00000054849	bcat2	22	1.62	-0.37	-0.02	-1.1	-0.12	0.73	0.1
435	ENSDARG00000036456	anxa4	1	-1.38	1.25	-0.5	0.52	0.11	0.73	-0.61
701	ENSDARG00000059015	lim2.2	1	-0.61	1.42	-0.83	0.69	-0.67	0.73	-0.16
1019	ENSDARG00000102908	il16	3	-1.36	0.97	-0.69	0.24	0.84	0.73	-1.53
1100	ENSDARG00000063014	dbpa	3	-1.37	0.83	-0.6	0.1	1.03	0.73	-1.63
2826	ENSDARG00000070057	si:dkey-69o16.5	15	0.43	0.67	0.67	-0.06	-1.71	0.73	2.38
3018	ENSDARG00000052623	bsdc1	16	1.6	0.19	-0.24	-0.54	-1.02	0.73	0.78
3551	ENSDARG00000071272	ncoa6	19	1.09	0.19	0.67	-0.54	-1.42	0.73	2.09
4499	ENSDARG00000068940	atp5meb	21	1.01	-0.53	1.02	-1.26	-0.24	0.73	1.26
4620	ENSDARG00000011553	atp5pb	21	1.36	-0.45	0.65	-1.18	-0.38	0.73	1.03
4699	ENSDARG00000037867	atp5mf	21	1.45	-0.52	0.26	-1.25	0.06	0.73	0.2
5260	ENSDARG00000043970	lrpprc	22	1.65	-0.19	0.09	-0.92	-0.63	0.73	0.72
5267	ENSDARG00000044562	cycsb	22	1.6	-0.18	0.21	-0.91	-0.73	0.73	0.94
4429	ENSDARG00000071040	smim8	21	0.57	-0.68	0.95	-1.41	0.57	0.73	0.38
120	ENSDARG00000105744	ptprr	1	-1.06	1.29	-0.94	0.57	0.13	0.72	-1.07
338	ENSDARG00000098529	ccne2	1	-1.21	1.35	-0.48	0.63	-0.29	0.72	-0.19
3690	ENSDARG00000007449	slc25a39	19	1.47	0.05	0.3	-0.67	-1.14	0.72	1.44
4670	ENSDARG00000039346	ndufa5	21	1.26	-0.57	0.66	-1.29	-0.07	0.72	0.73
5204	ENSDARG00000009250	etfb	22	1.57	-0.38	0.25	-1.1	-0.35	0.72	0.6
110	ENSDARG00000090873	ccl34a.4	1	-1.13	1.18	-0.96	0.46	0.45	0.72	-1.41
217	ENSDARG00000017294	gnai2b	1	-1.46	1.14	-0.48	0.42	0.39	0.72	-0.87
281	ENSDARG00000088699	pdzd8	1	-1.6	0.86	-0.2	0.14	0.8	0.72	-1
2500	ENSDARG00000043509	rpl11	9	-0.91	-0.06	1.59	-0.78	0.17	0.72	1.42
2532	ENSDARG00000057884	zgc:114174	9	-0.59	0.62	1.31	-0.1	-1.24	0.72	2.55
2860	ENSDARG00000021380	ppm1db	16	1.28	0.65	-0.65	-0.07	-1.23	0.72	0.58
3121	ENSDARG00000087059	selenou1b	16	1.7	-0.05	-0.2	-0.77	-0.68	0.72	0.48
3582	ENSDARG00000009436	ubxn7	19	1.41	0.31	0	-0.41	-1.32	0.72	1.32
3641	ENSDARG00000039915	bola1	19	1.41	-0.2	0.59	-0.92	-0.88	0.72	1.47
3642	ENSDARG00000096667	hemgn	19	1.38	-0.19	0.64	-0.91	-0.91	0.72	1.55
3650	ENSDARG00000034453	unc119a	19	1.48	-0.32	0.5	-1.04	-0.61	0.72	1.11
3677	ENSDARG00000056531	nutf2	19	1.32	0.09	0.49	-0.63	-1.27	0.72	1.76
4440	ENSDARG00000099974	ldb3b	21	0.69	-0.54	1.27	-1.26	-0.16	0.72	1.43
5126	ENSDARG00000061314	ngrn	22	1.57	-0.44	-0.02	-1.16	0.05	0.72	-0.07
671	ENSDARG00000057738	hells	1	-1.07	1.38	-0.62	0.66	-0.35	0.72	-0.27
330	ENSDARG00000036893	f13a1b	1	-1.2	1.33	-0.63	0.62	-0.12	0.71	-0.51
331	ENSDARG00000091138	actr3	1	-1.26	1.32	-0.54	0.61	-0.12	0.71	-0.42
3030	ENSDARG00000003081	mybphb	16	1.69	0.03	-0.24	-0.68	-0.8	0.71	0.56
3676	ENSDARG00000057206	nmt1b	19	1.33	0.04	0.53	-0.67	-1.23	0.71	1.76
4419	ENSDARG00000019304	phactr3b	21	0.24	-0.66	0.95	-1.37	0.84	0.71	0.11
118	ENSDARG00000044047	slc18b1	1	-1.18	1.25	-0.84	0.54	0.23	0.71	-1.07
280	ENSDARG00000009779	mcl1a	1	-1.62	0.85	-0.15	0.14	0.78	0.71	-0.93
443	ENSDARG00000013078	ywhaba	1	-1.49	1.19	-0.35	0.48	0.17	0.71	-0.52
938	ENSDARG00000101482	hk2	3	-1.24	1.13	-0.85	0.42	0.54	0.71	-1.39
2607	ENSDARG00000055618	acta1b	11	-0.19	-0.46	1.51	-1.17	0.32	0.71	1.19
4501	ENSDARG00000079516	cisd1	21	0.88	-0.51	1.17	-1.22	-0.32	0.71	1.49
4531	ENSDARG00000023309	spryd4	21	1.26	-0.48	0.8	-1.19	-0.39	0.71	1.19
4533	ENSDARG00000061761	opa3	21	1.13	-0.53	0.91	-1.24	-0.28	0.71	1.19
4534	ENSDARG00000093448	mpc1	21	1.16	-0.54	0.86	-1.25	-0.24	0.71	1.1
4671	ENSDARG00000043371	mdh2	21	1.38	-0.55	0.44	-1.26	-0.02	0.71	0.46
4689	ENSDARG00000024465	mrps18a	21	1.54	-0.44	0.27	-1.15	-0.21	0.71	0.48
4690	ENSDARG00000037057	gcdha	21	1.46	-0.51	0.33	-1.22	-0.05	0.71	0.38
4700	ENSDARG00000003869	decr1	21	1.49	-0.51	0.22	-1.22	0.02	0.71	0.2
5201	ENSDARG00000013333	ndufa10	22	1.56	-0.42	0.26	-1.12	-0.28	0.7	0.54
11	ENSDARG00000076532	si:ch211-222l21.1	1	-1.6	1.07	0.36	0.37	-0.2	0.7	0.56
722	ENSDARG00000012405	col1a1a	1	-1.06	1.37	-0.29	0.67	-0.69	0.7	0.4
1380	ENSDARG00000096959	si:dkey-29h14.10	3	-1.27	0.56	-0.5	-0.14	1.34	0.7	-1.84
5188	ENSDARG00000032426	COQ8A (1 of many)	22	1.65	-0.36	-0.02	-1.06	-0.21	0.7	0.19
1127	ENSDARG00000105142	tcirg1b	3	-1.19	0.85	-0.86	0.15	1.05	0.7	-1.91
2497	ENSDARG00000055381	bambia	9	-1.23	0.13	1.44	-0.57	0.24	0.7	1.2
2818	ENSDARG00000003151	skp1	15	1.03	0.49	0.29	-0.21	-1.6	0.7	1.89
3023	ENSDARG00000067817	CABZ01083448.1	16	1.62	0.09	-0.12	-0.61	-0.98	0.7	0.86
3116	ENSDARG00000003846	mrpl21	16	1.73	-0.06	-0.53	-0.76	-0.38	0.7	-0.15
3530	ENSDARG00000005139	hhatlb	19	0.51	-0.19	1.46	-0.89	-0.89	0.7	2.35
5199	ENSDARG00000044092	atp5if1b	22	1.55	-0.42	0.3	-1.11	-0.32	0.69	0.62
5203	ENSDARG00000052371	higd2a	22	1.58	-0.42	0.21	-1.11	-0.26	0.69	0.47
136	ENSDARG00000040184	syncrip	1	-0.86	1.29	-1.1	0.6	0.07	0.69	-1.17
1010	ENSDARG00000033042	ptprja	3	-1.29	1.04	-0.8	0.35	0.7	0.69	-1.5
1381	ENSDARG00000103520	si:dkey-148a17.5	3	-1.4	0.64	-0.41	-0.05	1.21	0.69	-1.62
1382	ENSDARG00000029865	rassf2a	3	-1.4	0.64	-0.4	-0.05	1.21	0.69	-1.61
1379	ENSDARG00000074782	adgrg3	3	-1.24	0.55	-0.53	-0.14	1.36	0.69	-1.89
3104	ENSDARG00000102362	slc25a12	16	1.62	0.03	-0.02	-0.66	-0.97	0.69	0.95
3119	ENSDARG00000019339	uxt	16	1.72	0.04	-0.55	-0.65	-0.57	0.69	0.02
3125	ENSDARG00000059304	chchd2	16	1.67	-0.08	-0.04	-0.77	-0.79	0.69	0.75
3126	ENSDARG00000014230	dlst	16	1.68	-0.08	-0.07	-0.77	-0.76	0.69	0.69
4574	ENSDARG00000052840	ndufs4	21	1.14	-0.66	0.61	-1.35	0.26	0.69	0.35
4575	ENSDARG00000042777	ndufa11	21	1.24	-0.63	0.55	-1.32	0.16	0.69	0.39
4866	ENSDARG00000017728	phb2b	22	1.5	-0.39	-0.47	-1.08	0.44	0.69	-0.91
5277	ENSDARG00000019404	atp5f1d	22	1.51	-0.4	0.42	-1.09	-0.45	0.69	0.87
112	ENSDARG00000008075	illr4	1	-1.14	1.2	-0.93	0.51	0.36	0.69	-1.29
113	ENSDARG00000116837	CABZ01040055.1	1	-1.08	1.22	-0.98	0.53	0.32	0.69	-1.3
672	ENSDARG00000060601	rgs7bpa	1	-1.02	1.38	-0.67	0.69	-0.38	0.69	-0.29
1107	ENSDARG00000003113	ada	3	-1.45	0.82	-0.49	0.13	0.99	0.69	-1.48
1383	ENSDARG00000090337	pprc1	3	-1.33	0.6	-0.47	-0.09	1.28	0.69	-1.75
2499	ENSDARG00000008433	unc45b	9	-1.4	0.33	1.34	-0.36	0.09	0.69	1.25
2869	ENSDARG00000045900	agbl5	16	1.61	0.3	-0.65	-0.39	-0.87	0.69	0.22
3020	ENSDARG00000018181	dnajc28	16	1.65	0.07	-0.18	-0.62	-0.92	0.69	0.74
3127	ENSDARG00000039203	zgc:110130	16	1.68	-0.18	-0.01	-0.87	-0.63	0.69	0.62
3583	ENSDARG00000002305	me3	19	1.34	0.34	0.06	-0.35	-1.4	0.69	1.46
3607	ENSDARG00000071090	actn2b	19	1.07	-0.26	1.03	-0.95	-0.9	0.69	1.93
3708	ENSDARG00000002194	rhd	19	1.44	-0.04	0.43	-0.73	-1.1	0.69	1.53
4503	ENSDARG00000037860	cox6b2	21	0.93	-0.55	1.11	-1.24	-0.25	0.69	1.36
119	ENSDARG00000090783	mfap4	1	-1.07	1.26	-0.96	0.58	0.18	0.68	-1.14
216	ENSDARG00000108953	si:ch211-283g2.2	1	-1.48	1.06	-0.49	0.38	0.53	0.68	-1.02
659	ENSDARG00000037188	rpa2	1	-0.92	1.35	-0.92	0.67	-0.19	0.68	-0.73
1161	ENSDARG00000062297	soat1	3	-1.12	0.56	-0.71	-0.12	1.39	0.68	-2.1
1434	ENSDARG00000019763	acp5a	3	-0.78	0.22	-0.62	-0.46	1.65	0.68	-2.27
2610	ENSDARG00000043453	rps5	11	-0.36	-0.35	1.64	-1.03	0.09	0.68	1.55
3633	ENSDARG00000077504	si:ch211-103n10.5	19	1.31	-0.23	0.75	-0.91	-0.92	0.68	1.67
5298	ENSDARG00000028379	trub2	22	1.54	-0.25	0.38	-0.93	-0.74	0.68	1.12
679	ENSDARG00000102245	tk1	1	-0.88	1.38	-0.84	0.7	-0.35	0.68	-0.49
705	ENSDARG00000036180	ccnb2	1	-0.81	1.4	-0.76	0.72	-0.55	0.68	-0.21
3605	ENSDARG00000068082	wbp4	19	1.04	-0.16	1.02	-0.84	-1.07	0.68	2.09
3683	ENSDARG00000096849	si:dkey-16p21.8	19	1.49	-0.03	0.33	-0.71	-1.08	0.68	1.41
3736	ENSDARG00000029415	mtx2	19	1.45	-0.14	0.5	-0.82	-0.99	0.68	1.49
4631	ENSDARG00000056307	znf706	21	1.47	-0.47	0.45	-1.15	-0.3	0.68	0.75
4638	ENSDARG00000045514	atp5f1c	21	1.38	-0.51	0.6	-1.19	-0.28	0.68	0.88
5284	ENSDARG00000021346	pdhb	22	1.56	-0.34	0.33	-1.02	-0.53	0.68	0.86
5307	ENSDARG00000087401	slc25a34	22	1.58	-0.31	0.31	-0.99	-0.59	0.68	0.9
669	ENSDARG00000078433	spc25	1	-1.03	1.36	-0.71	0.69	-0.31	0.67	-0.4
5278	ENSDARG00000007959	hibadhb	22	1.53	-0.41	0.39	-1.08	-0.43	0.67	0.82
2761	ENSDARG00000044073	fuca2	15	-0.18	1.33	-1.14	0.66	-0.67	0.67	-0.47
3019	ENSDARG00000014179	pfkma	16	1.61	0.12	-0.15	-0.55	-1.03	0.67	0.88
4438	ENSDARG00000038585	eif4e2	21	0.77	-0.61	1.18	-1.28	-0.06	0.67	1.24
5283	ENSDARG00000007745	uqcrfs1	22	1.57	-0.36	0.32	-1.03	-0.49	0.67	0.81
111	ENSDARG00000030694	atp6v1e1b	1	-1.11	1.15	-1	0.48	0.48	0.67	-1.48
732	ENSDARG00000040286	ubl7b	1	-0.91	1.39	-0.54	0.72	-0.66	0.67	0.12
939	ENSDARG00000086166	si:ch211-286b5.9	3	-1.29	1.13	-0.79	0.46	0.49	0.67	-1.28
1021	ENSDARG00000075265	plaua	3	-1.33	0.94	-0.73	0.27	0.86	0.67	-1.59
4637	ENSDARG00000059028	srrd	21	1.34	-0.52	0.67	-1.19	-0.29	0.67	0.96
5198	ENSDARG00000003207	mterf3	22	1.55	-0.44	0.29	-1.1	-0.3	0.66	0.59
309	ENSDARG00000058358	krt8	1	-1.37	1.27	-0.26	0.61	-0.26	0.66	0
1669	ENSDARG00000094861	si:dkey-163f12.11	4	-1.65	0.44	0.83	-0.22	0.59	0.66	0.24
3528	ENSDARG00000097239	si:ch73-31d8.2	19	0.82	-0.23	1.25	-0.89	-0.95	0.66	2.2
5194	ENSDARG00000067975	atp5if1a	22	1.66	-0.35	0.01	-1.01	-0.31	0.66	0.32
5263	ENSDARG00000061728	acot13	22	1.65	-0.27	0.13	-0.93	-0.58	0.66	0.71
5295	ENSDARG00000075768	sdhb	22	1.59	-0.37	0.27	-1.03	-0.46	0.66	0.73
5296	ENSDARG00000018002	eci1	22	1.59	-0.37	0.25	-1.03	-0.44	0.66	0.69
1018	ENSDARG00000104077	fcer1gl	3	-1.38	0.97	-0.67	0.31	0.78	0.66	-1.45
3686	ENSDARG00000027600	pdlim5b	19	1.54	-0.06	0.27	-0.72	-1.02	0.66	1.29
4634	ENSDARG00000079823	mrps36	21	1.41	-0.49	0.56	-1.15	-0.33	0.66	0.89
4701	ENSDARG00000104537	cox7c	21	1.48	-0.55	0.2	-1.21	0.08	0.66	0.12
5262	ENSDARG00000038075	cyc1	22	1.67	-0.2	0.06	-0.86	-0.66	0.66	0.72
5301	ENSDARG00000062538	TMEM132C	22	1.62	-0.29	0.21	-0.95	-0.6	0.66	0.81
5302	ENSDARG00000017775	atp5mc3a	22	1.61	-0.31	0.24	-0.97	-0.58	0.66	0.82
771	ENSDARG00000099312	jpt1b	1	-0.52	1.35	-0.41	0.7	-1.11	0.65	0.7
4569	ENSDARG00000095897	atp5f1e	21	1.05	-0.7	0.7	-1.35	0.3	0.65	0.4
5200	ENSDARG00000014915	ndufab1b	22	1.56	-0.45	0.26	-1.1	-0.27	0.65	0.53
433	ENSDARG00000077236	hspb6	1	-1.4	1.23	-0.44	0.58	0.03	0.65	-0.47
662	ENSDARG00000001452	adam8a	1	-1.05	1.33	-0.8	0.68	-0.16	0.65	-0.64
1030	ENSDARG00000061710	map3k8	3	-1.3	0.88	-0.76	0.23	0.95	0.65	-1.71
1105	ENSDARG00000102228	si:dkey-171c9.3	3	-1.32	0.76	-0.66	0.11	1.11	0.65	-1.77
1377	ENSDARG00000041799	cx43	3	-1.27	0.43	-0.36	-0.22	1.42	0.65	-1.78
1430	ENSDARG00000067566	sftpbb	3	-0.97	0.19	-0.4	-0.46	1.63	0.65	-2.03
1449	ENSDARG00000079657	si:dkey-53k12.1	3	-0.88	0.01	-0.15	-0.64	1.67	0.65	-1.82
2510	ENSDARG00000015128	rpl27	9	-1.04	-0.14	1.41	-0.79	0.56	0.65	0.85
2923	ENSDARG00000100552	taco1	16	1.5	0.26	-0.14	-0.39	-1.23	0.65	1.09
2998	ENSDARG00000090219	wdr45	16	1.52	0.4	-1.06	-0.25	-0.61	0.65	-0.45
3552	ENSDARG00000102658	zgc:174624	19	1	0.19	0.75	-0.46	-1.48	0.65	2.23
3689	ENSDARG00000052450	hspb2	19	1.43	0.05	0.34	-0.6	-1.22	0.65	1.56
742	ENSDARG00000056166	jac2	1	-0.72	1.39	-0.69	0.74	-0.72	0.65	0.03
3527	ENSDARG00000011152	rpp14	19	0.77	-0.17	1.26	-0.82	-1.05	0.65	2.31
3684	ENSDARG00000063145	tfam	19	1.49	-0.07	0.35	-0.72	-1.06	0.65	1.41
668	ENSDARG00000089507	ugt1b5	1	-1.1	1.34	-0.67	0.7	-0.26	0.64	-0.41
729	ENSDARG00000022438	cox6a1	1	-0.99	1.37	-0.6	0.73	-0.51	0.64	-0.09
948	ENSDARG00000088745	MFAP4 (1 of many)	3	-1.17	1.07	-0.96	0.43	0.63	0.64	-1.59
4573	ENSDARG00000063911	mt-atp6	21	1.1	-0.7	0.67	-1.34	0.27	0.64	0.4
4585	ENSDARG00000099870	tnni4a	21	0.98	-0.73	0.65	-1.37	0.47	0.64	0.18
5202	ENSDARG00000038154	isca2	22	1.59	-0.43	0.22	-1.07	-0.31	0.64	0.53
27	ENSDARG00000023330	anp32b	1	-1.49	0.81	0.95	0.17	-0.45	0.64	1.4
106	ENSDARG00000103994	ppiab	1	-0.96	1.29	0.01	0.65	-0.99	0.64	1
122	ENSDARG00000115760	si:dkey-30g5.1	1	-1.08	1.27	-0.9	0.63	0.08	0.64	-0.98
286	ENSDARG00000019137	tram1	1	-1.66	0.99	-0.04	0.35	0.37	0.64	-0.41
465	ENSDARG00000103032	rap2b	1	-1.27	1.23	-0.71	0.59	0.16	0.64	-0.87
2043	ENSDARG00000060992	rpusd2	6	-1.25	0.05	0.39	-0.59	1.39	0.64	-1
2573	ENSDARG00000059816	zgc:136864	11	-0.54	-0.21	1.71	-0.85	-0.11	0.64	1.82
2843	ENSDARG00000035136	selenow1	16	0.73	1.02	-0.97	0.38	-1.16	0.64	0.19
2868	ENSDARG00000097546	si:ch211-40k21.9	16	1.58	0.34	-0.72	-0.3	-0.89	0.64	0.17
3651	ENSDARG00000061505	mrps9	19	1.46	-0.4	0.56	-1.04	-0.58	0.64	1.14
3735	ENSDARG00000008859	mylipa	19	1.5	-0.22	0.44	-0.86	-0.86	0.64	1.3
4672	ENSDARG00000023290	fabp3	21	1.36	-0.59	0.53	-1.23	-0.07	0.64	0.6
5195	ENSDARG00000069615	ckmt2a	22	1.65	-0.36	0.09	-1	-0.39	0.64	0.48
231	ENSDARG00000045836	mapk11	1	-1.34	1.14	-0.7	0.5	0.4	0.64	-1.1
432	ENSDARG00000098345	mamdc2a	1	-1.52	1.13	0.22	0.49	-0.32	0.64	0.54
1020	ENSDARG00000041041	cxcr3.2	3	-1.35	0.94	-0.71	0.3	0.83	0.64	-1.54
4692	ENSDARG00000056510	gstk1	21	1.45	-0.55	0.41	-1.19	-0.11	0.64	0.52
4693	ENSDARG00000102607	pmpca	21	1.5	-0.53	0.31	-1.17	-0.11	0.64	0.42
676	ENSDARG00000058557	il11b	1	-0.98	1.36	-0.73	0.73	-0.37	0.63	-0.36
678	ENSDARG00000005993	prc1b	1	-0.84	1.37	-0.82	0.74	-0.44	0.63	-0.38
3649	ENSDARG00000022509	cox4i2	19	1.32	-0.43	0.78	-1.06	-0.61	0.63	1.39
4557	ENSDARG00000070567	cadpsb	21	0.89	-0.72	0.87	-1.35	0.31	0.63	0.56
5177	ENSDARG00000061580	kctd7	22	1.71	-0.29	-0.34	-0.92	-0.16	0.63	-0.18
466	ENSDARG00000077664	zgc:110239	1	-1.3	1.23	-0.64	0.6	0.11	0.63	-0.75
1029	ENSDARG00000002986	gda	3	-1.28	0.89	-0.8	0.26	0.93	0.63	-1.73
2657	ENSDARG00000096257	si:ch73-367p23.2	11	-0.18	-0.61	1.09	-1.24	0.94	0.63	0.15
2850	ENSDARG00000069105	fgfr4	16	1.31	0.51	-0.31	-0.12	-1.39	0.63	1.08
3008	ENSDARG00000041576	nudt18	16	1.66	0.12	-0.37	-0.51	-0.91	0.63	0.54
3102	ENSDARG00000039365	cuedc2	16	1.64	-0.05	0.02	-0.68	-0.92	0.63	0.94
4525	ENSDARG00000042133	si:dkey-51e6.1	21	1.15	-0.62	0.85	-1.25	-0.13	0.63	0.98
4579	ENSDARG00000058463	ndufab1a	21	1.21	-0.67	0.61	-1.3	0.15	0.63	0.46
4657	ENSDARG00000058454	dynll1	21	1.31	-0.65	0.42	-1.28	0.2	0.63	0.22
229	ENSDARG00000032708	arl4cb	1	-1.32	1.17	-0.7	0.54	0.31	0.63	-1.01
5184	ENSDARG00000103889	mettl17	22	1.7	-0.32	-0.18	-0.95	-0.26	0.63	0.08
661	ENSDARG00000098946	pald1a	1	-0.95	1.35	-0.81	0.73	-0.32	0.62	-0.49
950	ENSDARG00000009313	napsa	3	-1.21	1.09	-0.9	0.47	0.55	0.62	-1.45
3098	ENSDARG00000100372	alad	16	1.57	-0.06	0.18	-0.68	-1.02	0.62	1.2
3131	ENSDARG00000036438	ndufv1	16	1.7	-0.18	-0.04	-0.8	-0.67	0.62	0.63
3608	ENSDARG00000095019	lmo2	19	1.15	-0.31	0.97	-0.93	-0.88	0.62	1.85
4420	ENSDARG00000100795	timp4.3	21	0.23	-0.71	0.99	-1.33	0.83	0.62	0.16
5192	ENSDARG00000039667	mrpl38	22	1.68	-0.31	0.02	-0.93	-0.46	0.62	0.48
5206	ENSDARG00000028546	ndufs1	22	1.58	-0.43	0.27	-1.05	-0.37	0.62	0.64
1194	ENSDARG00000117000	AL929536.6	3	-0.28	0.16	-1.04	-0.46	1.61	0.62	-2.65
1662	ENSDARG00000093629	si:ch211-106h4.4	4	-1.48	0.42	-0.01	-0.2	1.27	0.62	-1.28
3007	ENSDARG00000053405	sord	16	1.64	0.13	-0.3	-0.49	-0.98	0.62	0.68
3031	ENSDARG00000069708	cdc34a	16	1.71	-0.01	-0.29	-0.63	-0.78	0.62	0.49
3099	ENSDARG00000038577	cox6c	16	1.6	-0.09	0.15	-0.71	-0.95	0.62	1.1
3129	ENSDARG00000034443	mpped2	16	1.68	-0.23	0.03	-0.85	-0.63	0.62	0.66
3643	ENSDARG00000096917	si:ch211-227m13.1	19	1.41	-0.27	0.62	-0.89	-0.87	0.62	1.49
3668	ENSDARG00000054778	pogza	19	1.45	0.13	0.18	-0.49	-1.27	0.62	1.45
3734	ENSDARG00000040822	fundc1	19	1.5	-0.25	0.46	-0.87	-0.85	0.62	1.31
3894	ENSDARG00000006487	anp32a	20	1.06	0.01	0.86	-0.61	-1.33	0.62	2.19
4656	ENSDARG00000100426	fam167b	21	1.42	-0.6	0.37	-1.22	0.03	0.62	0.34
4673	ENSDARG00000096003	atp5md	21	1.39	-0.6	0.48	-1.22	-0.05	0.62	0.53
5183	ENSDARG00000038309	dnajc15	22	1.69	-0.35	-0.17	-0.97	-0.21	0.62	0.04
5297	ENSDARG00000008785	dldh	22	1.63	-0.36	0.18	-0.98	-0.47	0.62	0.65
746	ENSDARG00000060023	ncapg2	1	-0.75	1.38	-0.59	0.76	-0.79	0.62	0.2
3652	ENSDARG00000030765	hadh	19	1.47	-0.34	0.54	-0.96	-0.72	0.62	1.26
4694	ENSDARG00000099358	hccsb	21	1.52	-0.53	0.29	-1.15	-0.13	0.62	0.42
663	ENSDARG00000035663	zgc:103438	1	-1.09	1.31	-0.75	0.7	-0.17	0.61	-0.58
1031	ENSDARG00000071491	nrros	3	-1.32	0.81	-0.71	0.2	1.02	0.61	-1.73
3130	ENSDARG00000059886	fam222ba	16	1.7	-0.18	-0.05	-0.79	-0.68	0.61	0.63
3721	ENSDARG00000014106	cfl2	19	1.56	-0.2	0.32	-0.81	-0.87	0.61	1.19
5300	ENSDARG00000020455	si:ch211-171h4.3	22	1.56	-0.32	0.36	-0.93	-0.68	0.61	1.04
5304	ENSDARG00000038834	etfdh	22	1.6	-0.31	0.28	-0.92	-0.65	0.61	0.93
956	ENSDARG00000102435	plekhf1	3	-1.08	1.01	-1.06	0.4	0.72	0.61	-1.78
1128	ENSDARG00000069844	acod1	3	-1.15	0.73	-0.86	0.12	1.17	0.61	-2.03
1652	ENSDARG00000014041	smarcad1a	4	-1.69	0.7	0.1	0.09	0.8	0.61	-0.7
1660	ENSDARG00000004754	hspa4a	4	-1.43	0.44	-0.14	-0.17	1.31	0.61	-1.45
2534	ENSDARG00000069189	si:dkey-242h9.3	9	-0.33	0.24	1.57	-0.37	-1.11	0.61	2.68
2924	ENSDARG00000044011	xkrx	16	1.5	0.23	-0.11	-0.38	-1.24	0.61	1.13
2935	ENSDARG00000002670	ATG14	16	1.6	0.18	-0.29	-0.43	-1.06	0.61	0.77
3005	ENSDARG00000092052	gstk4	16	1.65	0.2	-0.79	-0.41	-0.65	0.61	-0.14
3013	ENSDARG00000013087	ndrg3a	16	1.64	0.2	-0.54	-0.41	-0.9	0.61	0.36
3039	ENSDARG00000110298	mbd4	16	1.69	0.12	-0.53	-0.49	-0.79	0.61	0.26
3521	ENSDARG00000021372	tob1b	19	0.65	-0.04	1.28	-0.65	-1.23	0.61	2.51
3623	ENSDARG00000029242	fbxo3	19	1.27	-0.15	0.75	-0.76	-1.11	0.61	1.86
3669	ENSDARG00000100222	utrn	19	1.42	0.19	0.13	-0.42	-1.32	0.61	1.45
4432	ENSDARG00000076833	atp1b1b	21	-0.07	-0.62	1.31	-1.23	0.61	0.61	0.7
4597	ENSDARG00000021984	ndufa2	21	1.29	-0.68	0.38	-1.29	0.3	0.61	0.08
4653	ENSDARG00000070723	ndufa9a	21	1.3	-0.61	0.66	-1.22	-0.13	0.61	0.79
4658	ENSDARG00000068415	ptgesl	21	1.37	-0.64	0.35	-1.25	0.16	0.61	0.19
224	ENSDARG00000055225	dock8	1	-1.4	1.13	-0.61	0.52	0.36	0.61	-0.97
225	ENSDARG00000115712	twf1a	1	-1.4	1.15	-0.58	0.54	0.29	0.61	-0.87
4630	ENSDARG00000068265	tomm5	21	1.46	-0.52	0.5	-1.13	-0.31	0.61	0.81
336	ENSDARG00000091650	igflr1	1	-1.17	1.31	-0.57	0.71	-0.28	0.6	-0.29
444	ENSDARG00000099650	CABZ01079663.1	1	-1.57	1.12	-0.14	0.52	0.07	0.6	-0.21
747	ENSDARG00000053990	hmgb2b	1	-0.81	1.36	-0.51	0.76	-0.8	0.6	0.29
1158	ENSDARG00000045957	gpr65	3	-1.1	0.53	-0.76	-0.07	1.39	0.6	-2.15
4545	ENSDARG00000013430	bhmt	21	1.11	-0.43	1.03	-1.03	-0.68	0.6	1.71
5275	ENSDARG00000110496	zgc:162989	22	1.54	-0.43	0.39	-1.03	-0.47	0.6	0.86
944	ENSDARG00000112526	CABZ01114581.1	3	-1.21	0.96	-0.92	0.36	0.81	0.6	-1.73
1086	ENSDARG00000023188	lcp1	3	-1.33	0.96	-0.76	0.36	0.77	0.6	-1.53
945	ENSDARG00000076614	ssuh2.3	3	-1.15	0.95	-0.98	0.35	0.83	0.6	-1.81
1087	ENSDARG00000008165	caspa	3	-1.33	0.95	-0.76	0.35	0.8	0.6	-1.56
1432	ENSDARG00000103852	pigrl4.2	3	-1.12	0.29	-0.41	-0.31	1.55	0.6	-1.96
2925	ENSDARG00000035327	ckma	16	1.53	0.18	-0.11	-0.42	-1.2	0.6	1.09
2937	ENSDARG00000103554	notch1a	16	1.54	0.24	-0.24	-0.36	-1.18	0.6	0.94
3117	ENSDARG00000056638	pir	16	1.75	-0.1	-0.48	-0.7	-0.47	0.6	-0.01
3141	ENSDARG00000052842	ppifb	16	1.74	-0.15	-0.32	-0.75	-0.52	0.6	0.2
3727	ENSDARG00000053800	si:ch211-276c2.4	19	1.6	-0.23	0.27	-0.83	-0.8	0.6	1.07
4437	ENSDARG00000011673	si:ch211-246m6.5	21	0.49	-0.67	1.3	-1.27	0.15	0.6	1.15
4582	ENSDARG00000015385	ndufs3	21	1.2	-0.66	0.73	-1.26	-0.01	0.6	0.74
4655	ENSDARG00000016112	bbs12	21	1.43	-0.61	0.3	-1.21	0.09	0.6	0.21
5261	ENSDARG00000061746	arhgef9a	22	1.66	-0.25	0.1	-0.85	-0.66	0.6	0.76
5293	ENSDARG00000038768	mrpl12	22	1.59	-0.37	0.31	-0.97	-0.55	0.6	0.86
5299	ENSDARG00000019732	mtch2	22	1.56	-0.28	0.36	-0.88	-0.75	0.6	1.11
114	ENSDARG00000042698	si:dkey-15j16.6	1	-1.01	1.16	-1.09	0.56	0.38	0.6	-1.47
927	ENSDARG00000091003	il34	3	-1.18	1.15	-0.91	0.55	0.39	0.6	-1.3
4639	ENSDARG00000097209	cox8b	21	1.4	-0.54	0.6	-1.14	-0.32	0.6	0.92
4640	ENSDARG00000037259	ndufb6	21	1.36	-0.54	0.66	-1.14	-0.33	0.6	0.99
718	ENSDARG00000070822	cnp	1	-1.07	1.33	-0.56	0.74	-0.45	0.59	-0.11
724	ENSDARG00000021442	cdh11	1	-1.03	1.34	-0.42	0.75	-0.63	0.59	0.21
773	ENSDARG00000025043	trip13	1	-0.75	1.35	-0.45	0.76	-0.91	0.59	0.46
959	ENSDARG00000055759	efhd2	3	-1.11	1.06	-1.03	0.47	0.61	0.59	-1.64
1012	ENSDARG00000071084	wipf1b	3	-1.23	1.01	-0.89	0.42	0.69	0.59	-1.58
1162	ENSDARG00000068367	nfkbie	3	-0.92	0.67	-1.07	0.08	1.24	0.59	-2.31
2572	ENSDARG00000035175	schip1	11	-0.29	-0.29	1.73	-0.88	-0.26	0.59	1.99
2823	ENSDARG00000018966	cyb5r1	15	0.24	0.52	0.96	-0.07	-1.66	0.59	2.62
2841	ENSDARG00000022372	kng1	16	0.91	0.89	-0.84	0.3	-1.26	0.59	0.42
3132	ENSDARG00000020123	coq8a	16	1.71	-0.22	-0.06	-0.81	-0.61	0.59	0.55
4532	ENSDARG00000056108	ndufa4	21	1.25	-0.51	0.85	-1.1	-0.5	0.59	1.35
4571	ENSDARG00000036329	ndufa1	21	1.09	-0.71	0.76	-1.3	0.16	0.59	0.6
4572	ENSDARG00000069464	cox7a1	21	1.12	-0.73	0.63	-1.32	0.29	0.59	0.34
5205	ENSDARG00000003206	chchd6a	22	1.61	-0.43	0.23	-1.02	-0.38	0.59	0.61
5276	ENSDARG00000058297	timm13	22	1.54	-0.41	0.41	-1	-0.53	0.59	0.94
5303	ENSDARG00000076569	ndp	22	1.6	-0.34	0.28	-0.93	-0.61	0.59	0.89
467	ENSDARG00000039034	marcksl1a	1	-1.24	1.25	-0.67	0.66	-0.01	0.59	-0.66
1088	ENSDARG00000096037	si:ch211-214j24.14	3	-1.29	0.96	-0.81	0.37	0.78	0.59	-1.59
1033	ENSDARG00000008735	atp6ap2	3	-1.38	0.85	-0.66	0.26	0.93	0.59	-1.59
2877	ENSDARG00000062237	nfs1	16	1.11	0.72	-0.59	0.13	-1.37	0.59	0.78
3006	ENSDARG00000099889	dusp27	16	1.63	0.16	-0.34	-0.43	-1.01	0.59	0.67
3691	ENSDARG00000000861	scrib	19	1.52	0	0.21	-0.59	-1.14	0.59	1.35
4502	ENSDARG00000053509	kazald3	21	0.97	-0.59	1.1	-1.18	-0.31	0.59	1.41
4644	ENSDARG00000057855	mrps31	21	1.26	-0.58	0.78	-1.17	-0.3	0.59	1.08
5289	ENSDARG00000100613	CABZ01089777.1	22	1.58	-0.4	0.31	-0.99	-0.5	0.59	0.81
5290	ENSDARG00000102874	immt	22	1.58	-0.4	0.31	-0.99	-0.51	0.59	0.82
232	ENSDARG00000077746	AL935199.1	1	-1.32	1.1	-0.76	0.52	0.45	0.58	-1.21
655	ENSDARG00000045999	saa	1	-1	1.29	-0.9	0.71	-0.09	0.58	-0.81
656	ENSDARG00000111188	cdaa	1	-1.04	1.28	-0.89	0.7	-0.04	0.58	-0.85
677	ENSDARG00000042894	tyms	1	-0.94	1.34	-0.73	0.76	-0.44	0.58	-0.29
1028	ENSDARG00000015278	plxnc1	3	-1.32	0.89	-0.76	0.31	0.88	0.58	-1.64
1159	ENSDARG00000011434	ptger2a	3	-1.06	0.53	-0.81	-0.05	1.39	0.58	-2.2
2245	ENSDARG00000102291	eef1da	6	-0.8	-0.23	0.21	-0.81	1.62	0.58	-1.41
2652	ENSDARG00000101844	mibp2	11	-0.56	-0.49	1.22	-1.07	0.9	0.58	0.32
2653	ENSDARG00000076223	SERP1	11	-0.51	-0.51	1.24	-1.09	0.87	0.58	0.37
3541	ENSDARG00000076659	cdca7b	19	0.94	0.27	0.69	-0.31	-1.58	0.58	2.27
3670	ENSDARG00000035944	sync	19	1.48	0.14	0.08	-0.44	-1.26	0.58	1.34
3674	ENSDARG00000033364	mgst3b	19	1.56	0.07	0.01	-0.51	-1.14	0.58	1.15
3722	ENSDARG00000070866	tmem11	19	1.56	-0.21	0.33	-0.79	-0.89	0.58	1.22
1	ENSDARG00000070894	abhd6b	1	-1.68	0.98	0.23	0.4	0.06	0.58	0.17
121	ENSDARG00000101479	BX908782.2	1	-1.03	1.25	-0.96	0.67	0.06	0.58	-1.02
230	ENSDARG00000062748	pkn1b	1	-1.27	1.17	-0.77	0.59	0.28	0.58	-1.05
468	ENSDARG00000073893	dnase2	1	-1.22	1.26	-0.68	0.68	-0.03	0.58	-0.65
1387	ENSDARG00000017504	si:ch211-1o7.3	3	-1.33	0.36	-0.23	-0.22	1.42	0.58	-1.65
1370	ENSDARG00000095843	col24a1	3	-1.26	0.15	0.06	-0.43	1.48	0.58	-1.42
3128	ENSDARG00000062272	afg3l2	16	1.69	-0.26	0.02	-0.84	-0.61	0.58	0.63
3154	ENSDARG00000040401	slc25a20	16	1.72	-0.27	-0.09	-0.85	-0.51	0.58	0.42
3540	ENSDARG00000061948	amotl2b	19	0.98	0.22	0.71	-0.36	-1.54	0.58	2.25
4535	ENSDARG00000014794	uqcrc2a	21	1.12	-0.58	0.97	-1.16	-0.35	0.58	1.32
4652	ENSDARG00000079438	pkp3b	21	1.34	-0.62	0.59	-1.2	-0.11	0.58	0.7
4662	ENSDARG00000029764	mef2ca	21	1.35	-0.63	0.55	-1.21	-0.05	0.58	0.6
4663	ENSDARG00000092553	slc25a5	21	1.31	-0.65	0.6	-1.23	-0.03	0.58	0.63
5185	ENSDARG00000069920	cox17	22	1.7	-0.37	-0.12	-0.95	-0.25	0.58	0.13
285	ENSDARG00000068432	si:dkey-56m19.5	1	-1.68	0.93	-0.05	0.36	0.43	0.57	-0.48
686	ENSDARG00000016044	gins4	1	-0.77	1.32	-1	0.75	-0.29	0.57	-0.71
717	ENSDARG00000012450	vmp1	1	-1.11	1.32	-0.57	0.75	-0.39	0.57	-0.18
726	ENSDARG00000061351	tfpi2	1	-0.99	1.33	-0.36	0.76	-0.74	0.57	0.38
949	ENSDARG00000098774	si:zfos-741a10.3	3	-1.22	1.06	-0.91	0.49	0.58	0.57	-1.49
932	ENSDARG00000076318	atp6v1ab	3	-1.31	1.01	-0.79	0.44	0.66	0.57	-1.45
1378	ENSDARG00000100357	si:ch73-44m9.3	3	-1.37	0.46	-0.31	-0.11	1.34	0.57	-1.65
2842	ENSDARG00000004588	sox4a	16	0.91	0.87	-0.73	0.3	-1.34	0.57	0.61
2936	ENSDARG00000005050	wnt2ba	16	1.59	0.19	-0.32	-0.38	-1.09	0.57	0.77
3026	ENSDARG00000078419	filip1a	16	1.69	0.03	-0.32	-0.54	-0.86	0.57	0.54
3040	ENSDARG00000004697	rxrgb	16	1.71	0.03	-0.45	-0.54	-0.75	0.57	0.3
3685	ENSDARG00000035887	zgc:91944	19	1.49	-0.09	0.37	-0.66	-1.1	0.57	1.47
3723	ENSDARG00000076360	rpl37	19	1.57	-0.21	0.31	-0.78	-0.88	0.57	1.19
3733	ENSDARG00000099137	BX663503.3	19	1.48	-0.29	0.52	-0.86	-0.85	0.57	1.37
4596	ENSDARG00000000730	slc6a22.1	21	1.19	-0.73	0.49	-1.3	0.34	0.57	0.15
4636	ENSDARG00000042469	ndufa12	21	1.48	-0.5	0.5	-1.07	-0.41	0.57	0.91
5236	ENSDARG00000007264	nipsnap2	22	1.62	-0.32	0.24	-0.89	-0.65	0.57	0.89
133	ENSDARG00000006370	atp6v1h	1	-0.99	1.22	-1.04	0.65	0.16	0.57	-1.2
943	ENSDARG00000087832	bcl3	3	-1.23	0.94	-0.9	0.37	0.81	0.57	-1.71
1376	ENSDARG00000060248	fgd4b	3	-1.31	0.41	-0.34	-0.16	1.41	0.57	-1.75
2851	ENSDARG00000097264	si:ch211-40k21.5	16	1.37	0.47	-0.43	-0.1	-1.31	0.57	0.88
4651	ENSDARG00000074552	ndufs7	21	1.26	-0.65	0.7	-1.22	-0.08	0.57	0.78
4659	ENSDARG00000036684	ndufa7	21	1.33	-0.67	0.48	-1.24	0.1	0.57	0.38
14	ENSDARG00000006544	c1qtnf6b	1	-1.61	0.92	0.6	0.36	-0.27	0.56	0.87
442	ENSDARG00000059035	porb	1	-1.51	1.11	-0.38	0.55	0.23	0.56	-0.61
660	ENSDARG00000099839	si:ch211-9d9.1	1	-0.94	1.32	-0.85	0.76	-0.29	0.56	-0.56
743	ENSDARG00000100513	rps27l	1	-0.76	1.35	-0.66	0.79	-0.73	0.56	0.07
1664	ENSDARG00000098103	tefb	4	-1.53	0.56	-0.18	0	1.15	0.56	-1.33
2210	ENSDARG00000068708	ifrd1	6	-1.1	-0.18	0.72	-0.74	1.3	0.56	-0.58
2509	ENSDARG00000002204	hspb11	9	-1.15	-0.11	1.38	-0.67	0.54	0.56	0.84
2529	ENSDARG00000028542	si:ch211-114c12.2	9	-0.26	0.53	1.23	-0.03	-1.46	0.56	2.69
3017	ENSDARG00000018881	apobec2a	16	1.57	0.28	-0.52	-0.28	-1.05	0.56	0.53
3024	ENSDARG00000062385	flcn	16	1.71	0.02	-0.39	-0.54	-0.8	0.56	0.41
3647	ENSDARG00000039338	gadd45gip1	19	1.42	-0.41	0.64	-0.97	-0.68	0.56	1.32
4832	ENSDARG00000112670	smim20	22	1.68	-0.2	-0.75	-0.76	0.04	0.56	-0.79
5129	ENSDARG00000068156	chchd7	22	1.57	-0.55	0.13	-1.11	-0.04	0.56	0.17
5175	ENSDARG00000093496	si:zfos-905g2.1	22	1.73	-0.3	-0.26	-0.86	-0.31	0.56	0.05
5191	ENSDARG00000062045	il1rapl1a	22	1.7	-0.35	-0.06	-0.91	-0.39	0.56	0.33
5196	ENSDARG00000021555	prkn	22	1.63	-0.46	0.11	-1.02	-0.26	0.56	0.37
5226	ENSDARG00000099860	pkmb	22	1.65	-0.34	0.15	-0.9	-0.56	0.56	0.71
5232	ENSDARG00000069109	sssca1	22	1.63	-0.29	0.21	-0.85	-0.7	0.56	0.91
5294	ENSDARG00000034777	txn2	22	1.61	-0.42	0.24	-0.98	-0.46	0.56	0.7
2207	ENSDARG00000069769	gig2j	6	-0.82	-0.38	0.93	-0.94	1.2	0.56	-0.27
3522	ENSDARG00000013853	lmo4a	19	0.62	-0.02	1.27	-0.58	-1.29	0.56	2.56
4661	ENSDARG00000011146	uqcrb	21	1.33	-0.65	0.57	-1.21	-0.05	0.56	0.62
215	ENSDARG00000100339	arf4b	1	-1.58	1	-0.32	0.45	0.45	0.55	-0.77
933	ENSDARG00000044694	fybb	3	-1.31	1.02	-0.79	0.47	0.62	0.55	-1.41
1129	ENSDARG00000040474	snx10b	3	-1.2	0.73	-0.84	0.18	1.13	0.55	-1.97
1372	ENSDARG00000090851	ciita	3	-1.14	0.05	0.03	-0.5	1.56	0.55	-1.53
2536	ENSDARG00000055075	svila	9	0.32	0.18	1.3	-0.37	-1.43	0.55	2.73
3103	ENSDARG00000008982	casq2	16	1.65	-0.08	-0.01	-0.63	-0.93	0.55	0.92
3687	ENSDARG00000060395	si:dkey-57k2.7	19	1.48	0	0.27	-0.55	-1.2	0.55	1.47
3726	ENSDARG00000006181	hif1aa	19	1.62	-0.22	0.21	-0.77	-0.84	0.55	1.05
4547	ENSDARG00000058548	bves	21	0.94	-0.45	1.2	-1	-0.7	0.55	1.9
5210	ENSDARG00000010717	chchd10	22	1.57	-0.48	0.31	-1.03	-0.38	0.55	0.69
134	ENSDARG00000110781	prf1.7	1	-0.9	1.21	-1.13	0.66	0.17	0.55	-1.3
1104	ENSDARG00000100383	il10ra	3	-1.35	0.7	-0.63	0.15	1.13	0.55	-1.76
1157	ENSDARG00000104045	tlr22	3	-1.17	0.47	-0.64	-0.08	1.42	0.55	-2.06
4697	ENSDARG00000067848	nmrk2	21	1.47	-0.59	0.42	-1.14	-0.14	0.55	0.56
271	ENSDARG00000099865	hnrnpabb	1	-1.66	0.72	-0.06	0.18	0.83	0.54	-0.89
764	ENSDARG00000003952	pfn2	1	-0.52	1.33	-0.62	0.79	-0.98	0.54	0.36
1633	ENSDARG00000039830	gng5	4	-1.63	0.42	0.3	-0.12	1.03	0.54	-0.73
1665	ENSDARG00000079783	isg20	4	-1.53	0.48	-0.08	-0.06	1.19	0.54	-1.27
2498	ENSDARG00000042840	eml1	9	-1.26	0.01	1.41	-0.53	0.37	0.54	1.04
2828	ENSDARG00000051879	abcc8	15	0.77	0.54	0.4	0	-1.72	0.54	2.12
2829	ENSDARG00000077407	si:dkey-184p18.2	15	0.71	0.6	0.37	0.06	-1.73	0.54	2.1
2938	ENSDARG00000043257	ckbb	16	1.58	0.16	-0.21	-0.38	-1.14	0.54	0.93
3002	ENSDARG00000033551	fbxw4	16	1.7	0.01	-0.84	-0.53	-0.35	0.54	-0.49
3027	ENSDARG00000099617	sdr39u1	16	1.69	0.01	-0.29	-0.53	-0.88	0.54	0.59
3720	ENSDARG00000056322	ldb3a	19	1.58	-0.18	0.27	-0.72	-0.94	0.54	1.21
4577	ENSDARG00000097456	coa3b	21	1.22	-0.72	0.62	-1.26	0.15	0.54	0.47
4578	ENSDARG00000092873	zgc:193541	21	1.21	-0.72	0.63	-1.26	0.15	0.54	0.48
5197	ENSDARG00000069082	mrm3b	22	1.64	-0.47	0.09	-1.01	-0.25	0.54	0.34
5235	ENSDARG00000097871	si:ch1073-145m9.1	22	1.63	-0.33	0.23	-0.87	-0.66	0.54	0.89
5292	ENSDARG00000016721	sdha	22	1.61	-0.42	0.27	-0.96	-0.5	0.54	0.77
5305	ENSDARG00000071691	uqcrc2b	22	1.62	-0.38	0.26	-0.92	-0.58	0.54	0.84
2827	ENSDARG00000101713	scn2b	15	0.58	0.59	0.52	0.05	-1.74	0.54	2.26
4660	ENSDARG00000009685	ppa2	21	1.35	-0.66	0.56	-1.2	-0.05	0.54	0.61
5141	ENSDARG00000090568	mrpl52	22	1.54	-0.59	0.1	-1.13	0.08	0.54	0.02
4635	ENSDARG00000099499	ndufa4l	21	1.43	-0.57	0.55	-1.1	-0.31	0.53	0.86
651	ENSDARG00000058160	tnfaip2b	1	-1.06	1.28	-0.81	0.75	-0.17	0.53	-0.64
725	ENSDARG00000055064	prdx5	1	-1.05	1.31	-0.41	0.78	-0.63	0.53	0.22
731	ENSDARG00000021948	tnc	1	-0.95	1.33	-0.54	0.8	-0.64	0.53	0.1
1032	ENSDARG00000045681	irf5	3	-1.31	0.81	-0.76	0.28	0.99	0.53	-1.75
1435	ENSDARG00000062820	irgf3	3	-0.83	0.17	-0.64	-0.36	1.66	0.53	-2.3
2208	ENSDARG00000103555	si:ch211-8c17.4	6	-0.97	-0.3	0.86	-0.83	1.24	0.53	-0.38
2885	ENSDARG00000053062	CR628323.2	16	1.34	0.56	-0.86	0.03	-1.07	0.53	0.21
3014	ENSDARG00000079347	zgc:194659	16	1.62	0.2	-0.5	-0.33	-0.99	0.53	0.49
3095	ENSDARG00000021889	gja3	16	1.61	-0.09	0.1	-0.62	-1	0.53	1.1
3118	ENSDARG00000101062	fdft1	16	1.74	-0.07	-0.45	-0.6	-0.63	0.53	0.18
3133	ENSDARG00000043554	mrpl40	16	1.7	-0.25	0	-0.78	-0.67	0.53	0.67
3135	ENSDARG00000075132	fh	16	1.7	-0.19	-0.05	-0.72	-0.74	0.53	0.69
3152	ENSDARG00000034174	mrrf	16	1.73	-0.29	-0.12	-0.82	-0.49	0.53	0.37
3728	ENSDARG00000096578	cul4a	19	1.56	-0.28	0.36	-0.81	-0.83	0.53	1.19
4526	ENSDARG00000045146	tomm22	21	1.14	-0.7	0.83	-1.23	-0.04	0.53	0.87
5291	ENSDARG00000001169	hsd17b8	22	1.6	-0.43	0.29	-0.96	-0.5	0.53	0.79
434	ENSDARG00000002745	tdh	1	-1.38	1.19	-0.48	0.66	0.01	0.53	-0.49
3140	ENSDARG00000067593	sco1	16	1.75	-0.17	-0.32	-0.7	-0.56	0.53	0.24
4441	ENSDARG00000035264	riok2	21	0.7	-0.67	1.27	-1.2	-0.11	0.53	1.38
4650	ENSDARG00000062916	mrpl37	21	1.27	-0.67	0.7	-1.2	-0.1	0.53	0.8
4696	ENSDARG00000053021	grsf1	21	1.47	-0.61	0.38	-1.14	-0.1	0.53	0.48
744	ENSDARG00000086112	si:ch211-266i6.3	1	-0.74	1.34	-0.69	0.82	-0.73	0.52	0.04
745	ENSDARG00000102777	thbs4a	1	-0.76	1.34	-0.69	0.82	-0.71	0.52	0.02
36	ENSDARG00000056832	exo1	1	-1.27	1.23	-0.08	0.71	-0.59	0.52	0.51
270	ENSDARG00000089838	si:dkey-262k9.4	1	-1.62	0.75	-0.21	0.23	0.85	0.52	-1.06
685	ENSDARG00000114670	ube2c	1	-0.7	1.31	-0.99	0.79	-0.42	0.52	-0.57
958	ENSDARG00000037153	atp6ap1b	3	-1.09	1	-1.07	0.48	0.67	0.52	-1.74
1373	ENSDARG00000095654	tns3.1	3	-1.15	0.03	0.05	-0.49	1.56	0.52	-1.51
2246	ENSDARG00000063167	chkb	6	-0.56	-0.37	0.18	-0.89	1.65	0.52	-1.47
2919	ENSDARG00000103503	dgat1a	16	1.45	0.3	-0.21	-0.22	-1.31	0.52	1.1
3009	ENSDARG00000003165	nr2f6b	16	1.69	0.04	-0.36	-0.48	-0.89	0.52	0.53
3082	ENSDARG00000062148	SENP7	16	1.68	-0.09	-0.08	-0.61	-0.89	0.52	0.81
3101	ENSDARG00000020758	tmem178	16	1.64	-0.13	0.07	-0.65	-0.94	0.52	1.01
3639	ENSDARG00000093235	TST	19	1.33	-0.29	0.74	-0.81	-0.96	0.52	1.7
3648	ENSDARG00000018426	aldh7a1	19	1.33	-0.5	0.77	-1.02	-0.58	0.52	1.35
4581	ENSDARG00000061794	jam3b	21	1.18	-0.72	0.74	-1.24	0.05	0.52	0.69
5225	ENSDARG00000018266	mthfd1a	22	1.65	-0.39	0.19	-0.91	-0.54	0.52	0.73
5231	ENSDARG00000100116	mrps24	22	1.64	-0.29	0.19	-0.81	-0.73	0.52	0.92
4522	ENSDARG00000036675	hnrnpa1b	21	1.06	-0.67	0.98	-1.19	-0.18	0.52	1.16
4654	ENSDARG00000010113	ndufb8	21	1.33	-0.65	0.65	-1.17	-0.15	0.52	0.8
226	ENSDARG00000044114	cyb561d2	1	-1.44	1.11	-0.52	0.6	0.26	0.51	-0.78
417	ENSDARG00000045248	h3f3d	1	-1.3	1.24	-0.29	0.73	-0.38	0.51	0.09
461	ENSDARG00000027750	dpp7	1	-1.16	1.22	-0.82	0.71	0.05	0.51	-0.87
1155	ENSDARG00000055290	mpeg1.1	3	-1.21	0.51	-0.65	0	1.36	0.51	-2.01
1409	ENSDARG00000062009	gpr18	3	-1.09	0.3	-0.54	-0.21	1.54	0.51	-2.08
2465	ENSDARG00000105156	egln1b	9	-1.11	0.62	1.26	0.11	-0.88	0.51	2.14
2918	ENSDARG00000098901	CABZ01002768.1	16	1.46	0.21	-0.05	-0.3	-1.32	0.51	1.27
3015	ENSDARG00000040582	c18h3orf33	16	1.64	0.16	-0.5	-0.35	-0.95	0.51	0.45
3088	ENSDARG00000019459	elf2a	16	1.64	-0.2	0.13	-0.71	-0.87	0.51	1
3094	ENSDARG00000099560	lyrm5a	16	1.62	-0.1	0.09	-0.61	-1	0.51	1.09
3638	ENSDARG00000091348	rtn3	19	1.38	-0.32	0.69	-0.83	-0.92	0.51	1.61
3688	ENSDARG00000029722	hmgb2a	19	1.46	-0.03	0.33	-0.54	-1.21	0.51	1.54
3737	ENSDARG00000104587	srl	19	1.48	-0.22	0.48	-0.73	-1	0.51	1.48
4030	ENSDARG00000055781	ptger3	20	1.21	-0.48	0.93	-0.99	-0.67	0.51	1.6
5127	ENSDARG00000020015	mrps33	22	1.61	-0.54	-0.02	-1.05	0.01	0.51	-0.03
43	ENSDARG00000033832	ampd1	1	-1.17	1.18	0.19	0.67	-0.87	0.51	1.06
2799	ENSDARG00000101627	ssr1	15	0.13	1.13	-0.41	0.62	-1.47	0.51	1.06
4667	ENSDARG00000043467	ndufb11	21	1.42	-0.66	0.43	-1.17	-0.02	0.51	0.45
712	ENSDARG00000032264	mybl2b	1	-0.7	1.33	-0.76	0.83	-0.7	0.5	-0.06
713	ENSDARG00000012874	snap23.1	1	-0.57	1.32	-0.92	0.82	-0.66	0.5	-0.26
738	ENSDARG00000031246	hbegfb	1	-0.87	1.32	-0.64	0.82	-0.64	0.5	0
928	ENSDARG00000098114	ctsa	3	-1.25	1.1	-0.85	0.6	0.39	0.5	-1.24
4427	ENSDARG00000109996	CABZ01101996.1	21	0.74	-0.82	0.86	-1.32	0.53	0.5	0.33
105	ENSDARG00000020785	lama4	1	-0.84	1.21	0.08	0.71	-1.16	0.5	1.24
418	ENSDARG00000015312	klf12a	1	-1.23	1.26	-0.3	0.76	-0.49	0.5	0.19
650	ENSDARG00000097528	si:dkey-7j14.5	1	-1.13	1.27	-0.69	0.77	-0.23	0.5	-0.46
934	ENSDARG00000058348	scinlb	3	-1.3	1.01	-0.81	0.51	0.59	0.5	-1.4
1103	ENSDARG00000078734	myo1f	3	-1.27	0.63	-0.7	0.13	1.21	0.5	-1.91
1144	ENSDARG00000088612	si:ch211-153b23.7	3	-1.18	0.56	-0.76	0.06	1.31	0.5	-2.07
1371	ENSDARG00000039966	prom1a	3	-1.16	0.05	0	-0.45	1.57	0.5	-1.57
1440	ENSDARG00000114409	CR450686.5	3	-0.75	-0.03	-0.42	-0.53	1.73	0.5	-2.15
1661	ENSDARG00000104353	nop58	4	-1.47	0.37	-0.07	-0.13	1.3	0.5	-1.37
2042	ENSDARG00000008243	cct8	6	-1.45	0.1	0.58	-0.4	1.18	0.5	-0.6
2884	ENSDARG00000062951	meak7	16	1.48	0.39	-0.64	-0.11	-1.11	0.5	0.47
2929	ENSDARG00000042877	heca	16	1.55	0.23	-0.36	-0.27	-1.16	0.5	0.8
3142	ENSDARG00000069834	pnpla4	16	1.73	-0.23	-0.14	-0.73	-0.62	0.5	0.48
3542	ENSDARG00000104344	ccdc127a	19	0.8	0.32	0.71	-0.18	-1.65	0.5	2.36
3678	ENSDARG00000099600	si:dkey-93h22.7	19	1.37	-0.04	0.47	-0.54	-1.26	0.5	1.73
3893	ENSDARG00000036102	ctdsp2	20	1.13	0.15	0.58	-0.35	-1.5	0.5	2.08
4130	ENSDARG00000079391	mrpl42	20	1.46	-0.5	0.59	-1	-0.55	0.5	1.14
4590	ENSDARG00000069957	zgc:162936	21	1.28	-0.74	0.26	-1.24	0.44	0.5	-0.18
4869	ENSDARG00000104732	mlycd	22	1.15	-0.71	-0.05	-1.21	0.84	0.5	-0.89
5128	ENSDARG00000020871	ptprz1b	22	1.61	-0.55	-0.04	-1.05	0.03	0.5	-0.07
5233	ENSDARG00000069857	coq3	22	1.62	-0.36	0.26	-0.86	-0.66	0.5	0.92
710	ENSDARG00000036700	si:ch211-114n24.6	1	-0.7	1.32	-0.82	0.83	-0.62	0.49	-0.2
730	ENSDARG00000002790	ap2m1a	1	-0.96	1.31	-0.64	0.82	-0.53	0.49	-0.11
760	ENSDARG00000069027	admb	1	-0.88	1.31	-0.44	0.82	-0.81	0.49	0.37
926	ENSDARG00000013443	atp6v1ba	3	-1.16	1.09	-0.96	0.6	0.43	0.49	-1.39
4695	ENSDARG00000099663	cox5ab	21	1.49	-0.62	0.38	-1.11	-0.14	0.49	0.52
2212	ENSDARG00000042956	cyp2ad6	6	-0.95	-0.29	0.58	-0.78	1.44	0.49	-0.86
3151	ENSDARG00000002467	rdh14b	16	1.74	-0.31	-0.19	-0.8	-0.44	0.49	0.25
3153	ENSDARG00000035741	slc25a11	16	1.73	-0.3	-0.12	-0.79	-0.52	0.49	0.4
4867	ENSDARG00000042548	tpd52l1	22	1.51	-0.42	-0.67	-0.91	0.5	0.49	-1.17
459	ENSDARG00000100442	cfh	1	-1.12	1.21	-0.88	0.72	0.06	0.49	-0.94
1085	ENSDARG00000035459	spns3	3	-1.27	0.88	-0.86	0.39	0.86	0.49	-1.72
1102	ENSDARG00000042021	mapk12a	3	-1.32	0.66	-0.68	0.17	1.16	0.49	-1.84
3089	ENSDARG00000043608	eif4ebp1	16	1.66	-0.24	0.1	-0.73	-0.79	0.49	0.89
3096	ENSDARG00000099705	foxred1	16	1.58	-0.13	0.19	-0.62	-1.02	0.49	1.21
3097	ENSDARG00000005916	srpk3	16	1.59	-0.11	0.15	-0.6	-1.03	0.49	1.18
3667	ENSDARG00000061421	FQ311928.1	19	1.44	0.06	0.23	-0.43	-1.3	0.49	1.53
4834	ENSDARG00000035819	sirt3	22	1.72	-0.36	-0.44	-0.85	-0.06	0.49	-0.38
1651	ENSDARG00000077473	mych	4	-1.67	0.57	0.08	0.08	0.94	0.49	-0.86
4121	ENSDARG00000042122	acot11b	20	1.56	-0.45	0.4	-0.94	-0.57	0.49	0.97
34	ENSDARG00000070670	crip2	1	-1.33	1.17	0.11	0.68	-0.63	0.49	0.74
4870	ENSDARG00000058996	jam2a	22	1.35	-0.68	-0.09	-1.17	0.6	0.49	-0.69
673	ENSDARG00000016771	tfa	1	-0.94	1.3	-0.73	0.82	-0.46	0.48	-0.27
675	ENSDARG00000004270	atl3	1	-0.9	1.3	-0.78	0.82	-0.44	0.48	-0.34
682	ENSDARG00000100952	wu:fj16a03	1	-0.74	1.31	-0.9	0.83	-0.49	0.48	-0.41
740	ENSDARG00000044276	spp1	1	-0.82	1.32	-0.63	0.84	-0.7	0.48	0.07
4642	ENSDARG00000098972	mrps16	21	1.36	-0.6	0.69	-1.08	-0.38	0.48	1.07
4643	ENSDARG00000097606	tmem82	21	1.37	-0.59	0.69	-1.07	-0.4	0.48	1.09
942	ENSDARG00000004954	grna	3	-1.21	0.9	-0.93	0.42	0.82	0.48	-1.75
1040	ENSDARG00000089383	il1fma	3	-1.26	0.79	-0.84	0.31	1	0.48	-1.84
3093	ENSDARG00000088073	fam110b	16	1.6	-0.08	0.08	-0.56	-1.05	0.48	1.13
471	ENSDARG00000079917	rassf7a	1	-1.3	1.19	-0.62	0.71	0.02	0.48	-0.64
696	ENSDARG00000075421	pttg1	1	-0.94	1.29	-0.82	0.81	-0.34	0.48	-0.48
1034	ENSDARG00000087611	FP085398.1	3	-1.42	0.83	-0.64	0.35	0.87	0.48	-1.51
1131	ENSDARG00000056806	pde5aa	3	-1.07	0.75	-1.03	0.27	1.07	0.48	-2.1
1145	ENSDARG00000058731	slc2a6	3	-1.16	0.6	-0.82	0.12	1.26	0.48	-2.08
1147	ENSDARG00000104691	cd79b	3	-1.14	0.57	-0.81	0.09	1.3	0.48	-2.11
1156	ENSDARG00000091293	dmxl2	3	-1.16	0.49	-0.71	0.01	1.38	0.48	-2.09
2922	ENSDARG00000045127	FAM53C	16	1.52	0.18	-0.16	-0.3	-1.24	0.48	1.08
3033	ENSDARG00000074346	l3mbtl1b	16	1.69	0.07	-0.48	-0.41	-0.87	0.48	0.39
3100	ENSDARG00000097938	asb5a	16	1.64	-0.17	0.1	-0.65	-0.92	0.48	1.02
3602	ENSDARG00000055129	pim3	19	1.11	-0.24	0.97	-0.72	-1.11	0.48	2.08
3637	ENSDARG00000029019	epb41b	19	1.42	-0.37	0.65	-0.85	-0.84	0.48	1.49
3724	ENSDARG00000099677	bambib	19	1.62	-0.28	0.24	-0.76	-0.82	0.48	1.06
3725	ENSDARG00000039066	klhl31	19	1.6	-0.26	0.26	-0.74	-0.86	0.48	1.12
4421	ENSDARG00000042853	ivd	21	0.16	-0.77	0.69	-1.25	1.16	0.48	-0.47
4665	ENSDARG00000036135	bbox1	21	1.34	-0.7	0.56	-1.18	-0.02	0.48	0.58
5234	ENSDARG00000038845	ldhd	22	1.63	-0.37	0.24	-0.85	-0.65	0.48	0.89
235	ENSDARG00000078152	si:dkey-56i24.1	1	-1.32	1.14	-0.68	0.66	0.2	0.48	-0.88
236	ENSDARG00000011510	rcc2	1	-1.34	1.12	-0.68	0.65	0.26	0.47	-0.94
445	ENSDARG00000029058	rbbp4	1	-1.5	1.11	-0.31	0.64	0.06	0.47	-0.37
739	ENSDARG00000078322	col12a1a	1	-0.88	1.31	-0.58	0.84	-0.69	0.47	0.11
741	ENSDARG00000057672	plpp5	1	-0.82	1.31	-0.62	0.84	-0.72	0.47	0.1
952	ENSDARG00000044619	birc2	3	-1.13	1.05	-1.01	0.58	0.51	0.47	-1.52
2655	ENSDARG00000060215	cep85	11	-0.39	-0.63	1.05	-1.1	1.07	0.47	-0.02
5131	ENSDARG00000007818	palm1b	22	1.6	-0.57	0.13	-1.04	-0.12	0.47	0.25
196	ENSDARG00000103483	litaf	1	-1.51	0.89	-0.49	0.42	0.7	0.47	-1.19
3025	ENSDARG00000068213	fzd10	16	1.72	-0.05	-0.34	-0.52	-0.81	0.47	0.47
3675	ENSDARG00000017710	ppp1r14ab	19	1.31	-0.04	0.56	-0.51	-1.31	0.47	1.87
5257	ENSDARG00000053474	tdrkh	22	1.67	-0.45	0.1	-0.92	-0.39	0.47	0.49
469	ENSDARG00000009640	psmb1	1	-1.24	1.2	-0.69	0.73	0.01	0.47	-0.7
470	ENSDARG00000067723	tank	1	-1.26	1.2	-0.67	0.73	-0.01	0.47	-0.66
654	ENSDARG00000056985	tpte	1	-1.02	1.27	-0.82	0.8	-0.22	0.47	-0.6
1106	ENSDARG00000075592	tnfaip8l2a	3	-1.53	0.71	-0.39	0.24	0.97	0.47	-1.36
1411	ENSDARG00000024815	ogfrl2	3	-1.03	0.23	-0.55	-0.24	1.59	0.47	-2.14
3625	ENSDARG00000071673	ctdspla	19	1.16	-0.13	0.83	-0.6	-1.26	0.47	2.09
3891	ENSDARG00000092849	si:ch73-92e7.4	20	1.08	0.05	0.74	-0.42	-1.45	0.47	2.19
4131	ENSDARG00000023536	nnt	20	1.48	-0.52	0.55	-0.99	-0.51	0.47	1.06
4524	ENSDARG00000035549	uprt	21	1.02	-0.74	0.96	-1.21	-0.03	0.47	0.99
681	ENSDARG00000087909	il4	1	-0.78	1.3	-0.86	0.84	-0.5	0.46	-0.36
3149	ENSDARG00000067520	zgc:158482	16	1.75	-0.22	-0.23	-0.68	-0.61	0.46	0.38
1089	ENSDARG00000067751	si:rp71-68n21.9	3	-1.29	0.92	-0.84	0.46	0.76	0.46	-1.6
1093	ENSDARG00000062049	arhgap45b	3	-1.39	0.91	-0.71	0.45	0.74	0.46	-1.45
1041	ENSDARG00000104325	plek	3	-1.25	0.79	-0.86	0.33	0.99	0.46	-1.85
3730	ENSDARG00000102744	mgst3a	19	1.6	-0.32	0.29	-0.78	-0.79	0.46	1.08
3890	ENSDARG00000017591	fat1a	20	1.05	0.08	0.73	-0.38	-1.49	0.46	2.22
5187	ENSDARG00000032102	prdx3	22	1.72	-0.42	-0.12	-0.88	-0.3	0.46	0.18
716	ENSDARG00000101037	asf1ba	1	-1.13	1.27	-0.45	0.81	-0.5	0.46	0.05
720	ENSDARG00000011404	fen1	1	-1.12	1.27	-0.53	0.81	-0.43	0.46	-0.1
1146	ENSDARG00000099539	dicp2.2	3	-1.17	0.59	-0.81	0.13	1.27	0.46	-2.08
1445	ENSDARG00000044318	itgb7	3	-0.73	0.15	-0.77	-0.31	1.66	0.46	-2.43
2508	ENSDARG00000063372	zpld1b	9	-0.98	-0.27	1.48	-0.73	0.51	0.46	0.97
2582	ENSDARG00000090107	zmp:0000000984	11	-0.63	-0.17	1.75	-0.63	-0.33	0.46	2.08
2797	ENSDARG00000036616	gpr182	15	0.12	0.96	0.08	0.5	-1.67	0.46	1.75
3143	ENSDARG00000018105	casq1b	16	1.74	-0.26	-0.14	-0.72	-0.62	0.46	0.48
3718	ENSDARG00000040553	tmem97	19	1.56	-0.26	0.34	-0.72	-0.92	0.46	1.26
4135	ENSDARG00000038900	acadm	20	1.47	-0.56	0.54	-1.02	-0.43	0.46	0.97
4647	ENSDARG00000055620	acad9	21	1.3	-0.71	0.65	-1.17	-0.07	0.46	0.72
5130	ENSDARG00000089920	mlip	22	1.6	-0.56	0.17	-1.02	-0.19	0.46	0.36
5211	ENSDARG00000018840	trpc4apa	22	1.56	-0.54	0.37	-1	-0.4	0.46	0.77
5216	ENSDARG00000104139	atp1a3b	22	1.53	-0.53	0.43	-0.99	-0.45	0.46	0.88
674	ENSDARG00000003732	mitfa	1	-0.94	1.29	-0.73	0.84	-0.45	0.45	-0.28
709	ENSDARG00000045705	meig1	1	-0.81	1.3	-0.75	0.85	-0.6	0.45	-0.15
721	ENSDARG00000059363	tgfbr2a	1	-1.08	1.27	-0.58	0.82	-0.44	0.45	-0.14
761	ENSDARG00000021149	cbr1l	1	-0.89	1.29	-0.47	0.84	-0.77	0.45	0.3
4641	ENSDARG00000099517	adssl1	21	1.41	-0.59	0.63	-1.04	-0.41	0.45	1.04
5179	ENSDARG00000024295	slc11a2	22	1.69	-0.48	-0.16	-0.93	-0.13	0.45	-0.03
1626	ENSDARG00000018856	dclk1a	4	-1.74	0.52	0.44	0.07	0.7	0.45	-0.26
1677	ENSDARG00000100452	nop53	4	-1.76	0.74	0.38	0.29	0.35	0.45	0.03
2041	ENSDARG00000062655	ydjc	6	-1.42	0.02	0.65	-0.43	1.18	0.45	-0.53
2808	ENSDARG00000105568	si:ch211-194p6.10	15	0.51	0.9	-0.22	0.45	-1.64	0.45	1.42
3144	ENSDARG00000090195	mtx3	16	1.74	-0.29	-0.12	-0.74	-0.58	0.45	0.46
102	ENSDARG00000096118	ost4	1	-1.1	1.22	-0.04	0.77	-0.84	0.45	0.8
416	ENSDARG00000005230	ssr2	1	-1.32	1.21	-0.3	0.76	-0.35	0.45	0.05
425	ENSDARG00000031776	fthl27	1	-1.34	1.2	-0.4	0.75	-0.22	0.45	-0.18
652	ENSDARG00000018976	sptlc2a	1	-1.06	1.25	-0.81	0.8	-0.18	0.45	-0.63
955	ENSDARG00000019113	mob3a	3	-1.2	1	-0.95	0.55	0.6	0.45	-1.55
957	ENSDARG00000097847	si:ch211-269k10.4	3	-1.1	0.94	-1.07	0.49	0.73	0.45	-1.8
1082	ENSDARG00000077009	wdfy4	3	-1.3	0.82	-0.81	0.37	0.92	0.45	-1.73
1115	ENSDARG00000074302	gpr183b	3	-1.34	0.6	-0.61	0.15	1.2	0.45	-1.81
1375	ENSDARG00000098666	si:dkey-93h22.8	3	-1.26	0.1	0.01	-0.35	1.51	0.45	-1.5
2050	ENSDARG00000043542	zpr1	6	-1.03	-0.17	0.24	-0.62	1.57	0.45	-1.33
4527	ENSDARG00000020876	pdk2a	21	1.13	-0.74	0.88	-1.19	-0.08	0.45	0.96
4580	ENSDARG00000011400	tnnc1a	21	1.18	-0.78	0.69	-1.23	0.13	0.45	0.56
5209	ENSDARG00000016649	akr7a3	22	1.59	-0.52	0.31	-0.97	-0.41	0.45	0.72
5224	ENSDARG00000056680	stc2a	22	1.68	-0.38	0.09	-0.83	-0.56	0.45	0.65
123	ENSDARG00000037307	gnpda1	1	-1.21	1.13	-0.86	0.68	0.26	0.45	-1.12
233	ENSDARG00000103145	cdk2ap2	1	-1.37	1.13	-0.59	0.68	0.16	0.45	-0.75
227	ENSDARG00000027063	arpc1b	1	-1.37	1.03	-0.71	0.59	0.45	0.44	-1.16
653	ENSDARG00000017105	vaspb	1	-0.99	1.26	-0.84	0.82	-0.23	0.44	-0.61
680	ENSDARG00000077029	bub1	1	-0.83	1.29	-0.82	0.85	-0.49	0.44	-0.33
1197	ENSDARG00000089853	si:dkey-22n8.3	3	0.12	0.34	-1.56	-0.1	1.2	0.44	-2.76
4122	ENSDARG00000057128	hadhaa	20	1.56	-0.48	0.4	-0.92	-0.56	0.44	0.96
4134	ENSDARG00000059128	uqcrh	20	1.49	-0.58	0.49	-1.02	-0.38	0.44	0.87
197	ENSDARG00000079387	si:ch211-102c2.4	1	-1.54	0.88	-0.45	0.44	0.68	0.44	-1.13
941	ENSDARG00000105494	si:ch211-113d11.8	3	-1.21	0.85	-0.93	0.41	0.88	0.44	-1.81
1083	ENSDARG00000018283	cyba	3	-1.3	0.85	-0.82	0.41	0.86	0.44	-1.68
1163	ENSDARG00000077120	arid5a	3	-1.03	0.52	-0.92	0.08	1.35	0.44	-2.27
1671	ENSDARG00000017624	krt4	4	-1.73	0.49	0.74	0.05	0.45	0.44	0.29
5157	ENSDARG00000055976	pecr	22	1.76	-0.32	-0.39	-0.76	-0.29	0.44	-0.1
5186	ENSDARG00000045888	acat1	22	1.71	-0.46	-0.13	-0.9	-0.22	0.44	0.09
104	ENSDARG00000102105	dad1	1	-0.96	1.15	0.2	0.71	-1.1	0.44	1.3
460	ENSDARG00000068992	hspa8	1	-1.15	1.19	-0.85	0.75	0.06	0.44	-0.91
935	ENSDARG00000088091	pfn1	3	-1.34	1	-0.77	0.56	0.55	0.44	-1.32
2209	ENSDARG00000043856	amd1	6	-1.08	-0.28	0.85	-0.72	1.23	0.44	-0.38
3719	ENSDARG00000029292	zgc:55943	19	1.6	-0.25	0.26	-0.69	-0.92	0.44	1.18
4543	ENSDARG00000008880	usp28	21	0.83	-0.69	1.23	-1.13	-0.25	0.44	1.48
96	ENSDARG00000092798	ppib	1	-1	1.25	-0.24	0.82	-0.84	0.43	0.6
202	ENSDARG00000075952	mbd2	1	-1.56	0.92	-0.4	0.49	0.55	0.43	-0.95
228	ENSDARG00000014646	aoc2	1	-1.42	1.04	-0.61	0.61	0.39	0.43	-1
1035	ENSDARG00000006468	grap2a	3	-1.41	0.81	-0.66	0.38	0.88	0.43	-1.54
1114	ENSDARG00000036106	rgs18	3	-1.35	0.54	-0.55	0.11	1.25	0.43	-1.8
1388	ENSDARG00000097031	si:ch73-380l3.3	3	-1.31	0.28	-0.27	-0.15	1.45	0.43	-1.72
1363	ENSDARG00000115971	CU856344.2	3	-1.36	0.09	0.19	-0.34	1.41	0.43	-1.22
3147	ENSDARG00000023820	faxdc2	16	1.74	-0.22	-0.2	-0.65	-0.68	0.43	0.48
4029	ENSDARG00000070037	rgs8	20	1.24	-0.48	0.91	-0.91	-0.76	0.43	1.67
4200	ENSDARG00000054562	her15.1	20	1.57	-0.22	0.29	-0.65	-0.99	0.43	1.28
4645	ENSDARG00000101306	mrpl15	21	1.31	-0.66	0.75	-1.09	-0.3	0.43	1.05
5115	ENSDARG00000051989	tmem187	22	1.49	-0.63	0.44	-1.06	-0.24	0.43	0.68
5120	ENSDARG00000095157	zgc:163080	22	1.53	-0.64	0.32	-1.07	-0.14	0.43	0.46
5208	ENSDARG00000019717	pbx2	22	1.57	-0.58	0.31	-1.01	-0.29	0.43	0.6
1663	ENSDARG00000021443	zfp36l1b	4	-1.54	0.51	-0.2	0.08	1.15	0.43	-1.35
3134	ENSDARG00000031366	rtn4ip1	16	1.71	-0.3	-0.02	-0.73	-0.66	0.43	0.64
3640	ENSDARG00000077694	dtnba	19	1.32	-0.42	0.8	-0.85	-0.85	0.43	1.65
4199	ENSDARG00000006372	ugt5c2	20	1.54	-0.2	0.33	-0.63	-1.04	0.43	1.37
99	ENSDARG00000034718	tfpia	1	-1.1	1.24	-0.19	0.81	-0.75	0.43	0.56
124	ENSDARG00000102097	nfkbiz	1	-1.2	1.13	-0.86	0.7	0.23	0.43	-1.09
516	ENSDARG00000087693	atox1	1	-1.2	1.24	-0.53	0.81	-0.31	0.43	-0.22
936	ENSDARG00000076189	ccdc88b	3	-1.35	0.99	-0.76	0.56	0.55	0.43	-1.31
954	ENSDARG00000003931	cndp2	3	-1.2	0.97	-0.95	0.54	0.64	0.43	-1.59
2654	ENSDARG00000036489	zgc:112356	11	-0.65	-0.54	1.1	-0.97	1.06	0.43	0.04
4447	ENSDARG00000044175	oxtrl	21	0.52	-0.8	1.21	-1.23	0.3	0.43	0.91
4521	ENSDARG00000060199	mrpl18	21	0.98	-0.7	1.1	-1.13	-0.24	0.43	1.34
5215	ENSDARG00000052304	uqcrc1	22	1.62	-0.52	0.25	-0.95	-0.39	0.43	0.64
44	ENSDARG00000103672	cirbpa	1	-1.22	1.08	0.36	0.66	-0.88	0.42	1.24
92	ENSDARG00000035809	col1a1b	1	-0.9	1.25	-0.24	0.83	-0.94	0.42	0.7
210	ENSDARG00000100742	reep5	1	-1.66	0.92	-0.14	0.5	0.38	0.42	-0.52
706	ENSDARG00000095384	si:dkey-78l4.2	1	-0.79	1.29	-0.73	0.87	-0.64	0.42	-0.09
1192	ENSDARG00000093193	chia.6	3	-0.29	0.68	-1.58	0.26	0.93	0.42	-2.51
1130	ENSDARG00000058647	hck	3	-1.18	0.67	-0.89	0.25	1.15	0.42	-2.04
1153	ENSDARG00000077130	bcl10	3	-1.29	0.55	-0.65	0.13	1.26	0.42	-1.91
3083	ENSDARG00000088195	si:ch211-168f7.5	16	1.7	-0.14	-0.13	-0.56	-0.87	0.42	0.74
3612	ENSDARG00000037589	gid8b	19	1.39	-0.22	0.58	-0.64	-1.12	0.42	1.7
3646	ENSDARG00000090834	epor	19	1.4	-0.47	0.7	-0.89	-0.73	0.42	1.43
4119	ENSDARG00000029761	mpp6b	20	1.51	-0.51	0.5	-0.93	-0.58	0.42	1.08
4424	ENSDARG00000092677	coa6	21	0.77	-0.87	0.67	-1.29	0.72	0.42	-0.05
5214	ENSDARG00000045696	mrpl23	22	1.63	-0.5	0.22	-0.92	-0.44	0.42	0.66
15	ENSDARG00000044975	krt94	1	-1.66	0.84	0.57	0.42	-0.18	0.42	0.75
1037	ENSDARG00000013771	ctss2.2	3	-1.28	0.71	-0.79	0.29	1.07	0.42	-1.86
1056	ENSDARG00000113899	zgc:77650	3	-1.45	0.71	-0.56	0.29	1.01	0.42	-1.57
1195	ENSDARG00000058068	tnfsf10l4	3	-0.64	0.3	-1.08	-0.12	1.53	0.42	-2.61
2044	ENSDARG00000031495	seta	6	-1.31	-0.08	0.59	-0.5	1.3	0.42	-0.71
2894	ENSDARG00000002635	zgc:85722	16	1.48	0.3	-0.43	-0.12	-1.23	0.42	0.8
125	ENSDARG00000057644	adam8b	1	-1.16	1.13	-0.91	0.71	0.24	0.42	-1.15
517	ENSDARG00000063285	ube2t	1	-1.21	1.23	-0.56	0.81	-0.27	0.42	-0.29
518	ENSDARG00000097491	ugt1b1	1	-1.21	1.23	-0.55	0.81	-0.27	0.42	-0.28
4520	ENSDARG00000058940	si:ch211-248e11.2	21	0.98	-0.71	1.1	-1.12	-0.25	0.41	1.35
128	ENSDARG00000023967	atp6v1c1a	1	-0.94	1.01	-1.21	0.6	0.54	0.41	-1.75
237	ENSDARG00000028335	hmga1a	1	-1.36	1.08	-0.68	0.67	0.29	0.41	-0.97
429	ENSDARG00000012071	angptl1a	1	-1.54	1.07	-0.03	0.66	-0.17	0.41	0.14
431	ENSDARG00000076526	gar1	1	-1.54	1.01	0.33	0.6	-0.39	0.41	0.72
457	ENSDARG00000058349	polr2l	1	-1.69	0.92	0.04	0.51	0.22	0.41	-0.18
719	ENSDARG00000019907	dscc1	1	-1.12	1.25	-0.52	0.84	-0.45	0.41	-0.07
735	ENSDARG00000062152	chaf1a	1	-0.93	1.28	-0.62	0.87	-0.61	0.41	-0.01
1081	ENSDARG00000093074	si:ch211-139g16.8	3	-1.33	0.81	-0.78	0.4	0.9	0.41	-1.68
1122	ENSDARG00000015065	c4	3	-1.52	0.56	-0.32	0.15	1.12	0.41	-1.44
1142	ENSDARG00000070780	rln3a	3	-1.1	0.54	-0.88	0.13	1.31	0.41	-2.19
4206	ENSDARG00000069313	oxa1l	20	1.6	-0.23	0.23	-0.64	-0.96	0.41	1.19
5114	ENSDARG00000057805	mrpl28	22	1.5	-0.63	0.45	-1.04	-0.27	0.41	0.72
5237	ENSDARG00000111509	dtwd1	22	1.71	-0.4	0.02	-0.81	-0.52	0.41	0.54
2049	ENSDARG00000009087	cd74a	6	-0.99	-0.18	0.14	-0.59	1.62	0.41	-1.48
2912	ENSDARG00000099960	elovl1a	16	1.3	0.36	-0.14	-0.05	-1.47	0.41	1.33
3049	ENSDARG00000069775	fbxo40.1	16	1.75	-0.18	-0.3	-0.59	-0.69	0.41	0.39
126	ENSDARG00000076221	fthl28	1	-1.05	1.14	-1.01	0.73	0.19	0.41	-1.2
937	ENSDARG00000099969	zgc:152863	3	-1.38	0.97	-0.72	0.56	0.57	0.41	-1.29
4595	ENSDARG00000062971	sdhaf2	21	1.37	-0.76	0.36	-1.17	0.2	0.41	0.16
4666	ENSDARG00000088357	acadl	21	1.38	-0.74	0.47	-1.15	0.04	0.41	0.43
5181	ENSDARG00000056650	zgc:113276	22	1.68	-0.53	-0.03	-0.94	-0.18	0.41	0.15
5218	ENSDARG00000042975	auh	22	1.58	-0.55	0.34	-0.96	-0.41	0.41	0.75
5105	ENSDARG00000092123	si:dkey-20d21.12	22	1.49	-0.69	0.34	-1.09	-0.04	0.4	0.38
5139	ENSDARG00000001929	pink1	22	1.51	-0.69	0.03	-1.09	0.25	0.4	-0.22
98	ENSDARG00000044074	loxl2b	1	-1.06	1.24	-0.25	0.84	-0.77	0.4	0.52
109	ENSDARG00000029353	serpine2	1	-0.8	1.08	0.31	0.68	-1.28	0.4	1.59
684	ENSDARG00000078266	twist2	1	-0.75	1.27	-0.92	0.87	-0.47	0.4	-0.45
708	ENSDARG00000018903	aimp2	1	-0.81	1.28	-0.78	0.88	-0.57	0.4	-0.21
1036	ENSDARG00000042925	mfng	3	-1.4	0.79	-0.68	0.39	0.89	0.4	-1.57
1048	ENSDARG00000026990	klhl6	3	-1.37	0.76	-0.7	0.36	0.96	0.4	-1.66
1139	ENSDARG00000036420	si:dkey-33c9.6	3	-1.23	0.61	-0.79	0.21	1.21	0.4	-2
1439	ENSDARG00000026049	mxf	3	-0.79	0.01	-0.53	-0.39	1.71	0.4	-2.24
2040	ENSDARG00000101629	CABZ01079192.1	6	-1.46	0.02	0.69	-0.38	1.12	0.4	-0.43
2921	ENSDARG00000069190	zgc:172339	16	1.52	0.09	-0.03	-0.31	-1.26	0.4	1.23
3037	ENSDARG00000104847	ptger1b	16	1.71	0	-0.51	-0.4	-0.8	0.4	0.29
3042	ENSDARG00000099461	asb10	16	1.73	-0.14	-0.24	-0.54	-0.81	0.4	0.57
3079	ENSDARG00000101831	irx1a	16	1.65	0.03	-0.26	-0.37	-1.04	0.4	0.78
3145	ENSDARG00000086471	pkig	16	1.73	-0.28	-0.1	-0.68	-0.67	0.4	0.57
3603	ENSDARG00000038305	vgll3	19	1.06	-0.35	1.06	-0.75	-1.03	0.4	2.09
3645	ENSDARG00000096989	fam110c	19	1.43	-0.52	0.65	-0.92	-0.64	0.4	1.29
3729	ENSDARG00000109774	CABZ01084963.1	19	1.59	-0.35	0.34	-0.75	-0.82	0.4	1.16
1084	ENSDARG00000071251	ppp1r18	3	-1.3	0.84	-0.83	0.44	0.85	0.4	-1.68
1415	ENSDARG00000068233	zgc:64051	3	-1.22	0.42	-0.62	0.02	1.4	0.4	-2.02
2920	ENSDARG00000031336	hsd20b2	16	1.54	0.04	-0.01	-0.36	-1.22	0.4	1.21
4835	ENSDARG00000060120	glyctk	22	1.71	-0.45	-0.41	-0.85	0	0.4	-0.41
426	ENSDARG00000097845	si:ch211-105j21.9	1	-1.44	1.13	-0.29	0.73	-0.14	0.4	-0.15
463	ENSDARG00000006029	lta4h	1	-1.18	1.19	-0.76	0.79	-0.04	0.4	-0.72
515	ENSDARG00000093804	sst6	1	-1.26	1.21	-0.45	0.81	-0.3	0.4	-0.15
4434	ENSDARG00000001975	hsd11b2	21	0.06	-0.77	1.31	-1.17	0.56	0.4	0.75
234	ENSDARG00000077777	tmsb4x	1	-1.3	1.12	-0.7	0.73	0.15	0.39	-0.85
238	ENSDARG00000056233	zgc:110591	1	-1.38	1.08	-0.63	0.69	0.23	0.39	-0.86
5230	ENSDARG00000012387	pdha1a	22	1.67	-0.42	0.16	-0.81	-0.6	0.39	0.76
428	ENSDARG00000056134	c1qtnf5	1	-1.52	1.07	0.01	0.68	-0.24	0.39	0.25
647	ENSDARG00000007769	sult5a1	1	-1.11	1.22	-0.75	0.83	-0.19	0.39	-0.56
736	ENSDARG00000068275	ptx3a	1	-0.91	1.27	-0.65	0.88	-0.6	0.39	-0.05
1047	ENSDARG00000067797	spi1a	3	-1.41	0.76	-0.66	0.37	0.94	0.39	-1.6
1152	ENSDARG00000010317	gpr183a	3	-1.25	0.56	-0.73	0.17	1.25	0.39	-1.98
1164	ENSDARG00000101050	tmc8	3	-0.98	0.51	-0.99	0.12	1.34	0.39	-2.33
1408	ENSDARG00000098918	mcoln2	3	-1.04	0.29	-0.68	-0.1	1.53	0.39	-2.21
2927	ENSDARG00000077297	nbr1a	16	1.55	0.19	-0.37	-0.2	-1.17	0.39	0.8
2960	ENSDARG00000001785	irx2a	16	1.64	0.07	-0.35	-0.32	-1.04	0.39	0.69
3091	ENSDARG00000071478	lnx2b	16	1.69	-0.25	0.01	-0.64	-0.81	0.39	0.82
3268	ENSDARG00000092522	nnt2	16	1.77	-0.28	-0.34	-0.67	-0.48	0.39	0.14
3679	ENSDARG00000096829	blvrb	19	1.43	-0.12	0.43	-0.51	-1.22	0.39	1.65
4039	ENSDARG00000034309	cox10	20	1.21	-0.61	0.93	-1	-0.53	0.39	1.46
4205	ENSDARG00000061629	ndufaf5	20	1.63	-0.26	0.2	-0.65	-0.91	0.39	1.11
4290	ENSDARG00000086184	FBXO48	20	1.72	-0.37	0	-0.76	-0.58	0.39	0.58
4379	ENSDARG00000040314	psph	20	1.65	-0.36	0.19	-0.75	-0.73	0.39	0.92
4863	ENSDARG00000056862	cep63	22	1.54	-0.63	-0.26	-1.02	0.37	0.39	-0.63
5140	ENSDARG00000039374	apool	22	1.58	-0.65	0.05	-1.04	0.07	0.39	-0.02
3150	ENSDARG00000052638	fam210b	16	1.76	-0.33	-0.21	-0.72	-0.5	0.39	0.29
4291	ENSDARG00000032469	ampd3b	20	1.73	-0.34	-0.05	-0.73	-0.61	0.39	0.56
4664	ENSDARG00000056856	tax1bp1b	21	1.34	-0.75	0.58	-1.14	-0.03	0.39	0.61
5219	ENSDARG00000104111	mrps30	22	1.59	-0.56	0.32	-0.95	-0.4	0.39	0.72
129	ENSDARG00000045543	atp6v1f	1	-1.11	1.08	-1	0.7	0.34	0.38	-1.34
1054	ENSDARG00000041980	calhm6	3	-1.37	0.68	-0.66	0.3	1.06	0.38	-1.72
41	ENSDARG00000020072	thbs4b	1	-1.35	1.05	0.35	0.67	-0.71	0.38	1.06
97	ENSDARG00000099786	actn4	1	-1.07	1.22	-0.2	0.84	-0.79	0.38	0.59
514	ENSDARG00000020504	h3f3a	1	-1.26	1.2	-0.47	0.82	-0.28	0.38	-0.19
694	ENSDARG00000075621	birc5a	1	-1.04	1.24	-0.75	0.86	-0.3	0.38	-0.45
697	ENSDARG00000002298	ankrd22	1	-0.97	1.24	-0.84	0.86	-0.28	0.38	-0.56
707	ENSDARG00000074425	si:busm1-57f23.1	1	-0.82	1.27	-0.75	0.89	-0.59	0.38	-0.16
929	ENSDARG00000019062	arpc5b	3	-1.25	1.05	-0.87	0.67	0.4	0.38	-1.27
951	ENSDARG00000034534	atp6v1aa	3	-1.12	0.97	-1.04	0.59	0.6	0.38	-1.64
1151	ENSDARG00000033735	ncf1	3	-1.25	0.55	-0.72	0.17	1.25	0.38	-1.97
2531	ENSDARG00000002768	pvalb2	9	-0.71	0.38	1.45	0	-1.11	0.38	2.56
2883	ENSDARG00000052470	igfbp2a	16	1.47	0.35	-0.67	-0.03	-1.12	0.38	0.45
2928	ENSDARG00000061048	ranbp9	16	1.53	0.22	-0.4	-0.16	-1.19	0.38	0.79
3048	ENSDARG00000031649	cort	16	1.76	-0.17	-0.36	-0.55	-0.67	0.38	0.31
3148	ENSDARG00000089159	acot14	16	1.75	-0.26	-0.23	-0.64	-0.63	0.38	0.4
3660	ENSDARG00000004343	nelfe	19	1.6	-0.07	0.04	-0.45	-1.11	0.38	1.15
4120	ENSDARG00000087178	scpp9	20	1.51	-0.5	0.52	-0.88	-0.65	0.38	1.17
4591	ENSDARG00000053485	aldh6a1	21	1.21	-0.83	0.57	-1.21	0.26	0.38	0.31
5223	ENSDARG00000004592	gpr22a	22	1.55	-0.59	0.4	-0.97	-0.39	0.38	0.79
5258	ENSDARG00000027009	zgc:85777	22	1.69	-0.49	0.03	-0.87	-0.36	0.38	0.39
3626	ENSDARG00000069922	popdc2	19	1.2	-0.32	0.9	-0.7	-1.08	0.38	1.98
5229	ENSDARG00000045814	samm50	22	1.66	-0.44	0.18	-0.82	-0.58	0.38	0.76
4594	ENSDARG00000116680	zgc:56235	21	1.35	-0.79	0.37	-1.17	0.24	0.38	0.13
4649	ENSDARG00000071468	mrpl54	21	1.25	-0.76	0.73	-1.14	-0.07	0.38	0.8
5153	ENSDARG00000060222	scn1ba	22	1.74	-0.42	-0.35	-0.79	-0.19	0.37	-0.16
5246	ENSDARG00000058048	ugt5e1	22	1.69	-0.41	0.11	-0.78	-0.61	0.37	0.72
711	ENSDARG00000007960	hnrnpaba	1	-0.68	1.27	-0.79	0.9	-0.7	0.37	-0.09
714	ENSDARG00000041361	ttk	1	-0.59	1.26	-0.98	0.89	-0.57	0.37	-0.41
715	ENSDARG00000101789	cyp1c2	1	-1.1	1.24	-0.46	0.87	-0.54	0.37	0.08
763	ENSDARG00000039354	ska1	1	-0.92	1.26	-0.51	0.89	-0.72	0.37	0.21
768	ENSDARG00000071410	cks2	1	-0.66	1.24	-0.41	0.87	-1.05	0.37	0.64
1374	ENSDARG00000079095	rin1a	3	-1.24	0.07	-0.06	-0.3	1.54	0.37	-1.6
2119	ENSDARG00000035629	parvab	6	-0.73	-0.26	-0.11	-0.63	1.73	0.37	-1.84
2554	ENSDARG00000068461	zgc:162939	10	-1.6	0.29	1.14	-0.08	0.25	0.37	0.89
2555	ENSDARG00000026871	uchl1	10	-1.5	0.15	1.26	-0.22	0.31	0.37	0.95
2708	ENSDARG00000040565	ckmb	12	0.42	-0.55	1.56	-0.92	-0.51	0.37	2.07
3228	ENSDARG00000079698	asb13a.1	16	1.76	-0.12	-0.56	-0.49	-0.58	0.37	0.02
3523	ENSDARG00000021184	rbfox1l	19	0.74	-0.14	1.21	-0.51	-1.31	0.37	2.52
4037	ENSDARG00000008407	tspan7b	20	1.23	-0.66	0.89	-1.03	-0.44	0.37	1.33
4073	ENSDARG00000038667	fggy	20	1.5	-0.37	0.51	-0.74	-0.9	0.37	1.41
4198	ENSDARG00000052139	notch3	20	1.54	-0.27	0.37	-0.64	-1.01	0.37	1.38
4202	ENSDARG00000063370	sgk2a	20	1.58	-0.16	0.18	-0.53	-1.07	0.37	1.25
4289	ENSDARG00000032919	chchd3a	20	1.74	-0.37	-0.09	-0.74	-0.53	0.37	0.44
4400	ENSDARG00000025566	slc25a3b	20	1.61	-0.47	0.31	-0.84	-0.61	0.37	0.92
4402	ENSDARG00000016687	acadvl	20	1.6	-0.51	0.34	-0.88	-0.56	0.37	0.9
5180	ENSDARG00000042737	slc52a3	22	1.7	-0.53	-0.12	-0.9	-0.15	0.37	0.03
1143	ENSDARG00000040255	ephx2	3	-1.13	0.57	-0.89	0.2	1.25	0.37	-2.14
5255	ENSDARG00000054537	nhsl1a	22	1.69	-0.46	0.1	-0.83	-0.49	0.37	0.59
35	ENSDARG00000019353	sparc	1	-1.26	1.16	-0.02	0.79	-0.67	0.37	0.65
481	ENSDARG00000070683	dkk3b	1	-1.35	1.15	-0.51	0.78	-0.07	0.37	-0.44
627	ENSDARG00000029663	rab1ab	1	-1.07	1.18	-0.9	0.81	-0.02	0.37	-0.88
4593	ENSDARG00000102115	ndufc2	21	1.28	-0.81	0.55	-1.18	0.15	0.37	0.4
4646	ENSDARG00000058794	si:dkey-19a16.2	21	1.27	-0.79	0.65	-1.16	0.02	0.37	0.63
427	ENSDARG00000006901	si:ch1073-459j12.1	1	-1.46	1.08	0.08	0.72	-0.42	0.36	0.5
5217	ENSDARG00000018600	retsat	22	1.56	-0.57	0.41	-0.93	-0.48	0.36	0.89
1628	ENSDARG00000014731	cacybp	4	-1.68	0.34	0.43	-0.02	0.93	0.36	-0.5
3078	ENSDARG00000018461	zgc:56095	16	1.63	0.02	-0.24	-0.34	-1.07	0.36	0.83
100	ENSDARG00000059944	c1qtnf2	1	-1.11	1.2	-0.14	0.84	-0.78	0.36	0.64
648	ENSDARG00000087804	tnfrsf11a	1	-1.14	1.2	-0.73	0.84	-0.16	0.36	-0.57
695	ENSDARG00000016594	haus4	1	-0.92	1.24	-0.83	0.88	-0.38	0.36	-0.45
953	ENSDARG00000005481	nfkbiaa	3	-1.23	0.91	-0.94	0.55	0.69	0.36	-1.63
1112	ENSDARG00000094451	cfp	3	-1.4	0.47	-0.44	0.11	1.27	0.36	-1.71
2263	ENSDARG00000075491	si:ch211-26b3.4	6	-1	-0.39	1.13	-0.75	1.01	0.36	0.12
2812	ENSDARG00000042410	rab40b	15	1.07	0.36	0.2	0	-1.64	0.36	1.84
2813	ENSDARG00000075346	tmem129	15	0.91	0.46	0.23	0.1	-1.7	0.36	1.93
2886	ENSDARG00000076547	si:ch211-221f10.2	16	1.38	0.44	-0.71	0.08	-1.19	0.36	0.48
2930	ENSDARG00000096661	si:ch211-286b5.5	16	1.57	0.14	-0.33	-0.22	-1.16	0.36	0.83
3041	ENSDARG00000028559	march5l	16	1.72	-0.09	-0.31	-0.45	-0.86	0.36	0.55
3081	ENSDARG00000017821	gata5	16	1.6	0	-0.11	-0.36	-1.13	0.36	1.02
3085	ENSDARG00000078640	fam117aa	16	1.72	-0.23	-0.09	-0.59	-0.8	0.36	0.71
4448	ENSDARG00000075608	mical2a	21	0.72	-0.86	1.1	-1.22	0.25	0.36	0.85
4564	ENSDARG00000013711	zgc:77486	21	1.06	-0.86	0.78	-1.22	0.24	0.36	0.54
4837	ENSDARG00000016835	tcirg1a	22	1.65	-0.56	-0.31	-0.92	0.14	0.36	-0.45
5207	ENSDARG00000019355	coa7	22	1.61	-0.58	0.24	-0.94	-0.34	0.36	0.58
5220	ENSDARG00000039273	fbln5	22	1.59	-0.58	0.33	-0.94	-0.39	0.36	0.72
1055	ENSDARG00000104197	ptpn22	3	-1.38	0.69	-0.68	0.33	1.03	0.36	-1.71
3731	ENSDARG00000018004	nkx2.5	19	1.58	-0.33	0.35	-0.69	-0.9	0.36	1.25
410	ENSDARG00000037804	phlda3	1	-1.37	1.14	-0.09	0.78	-0.45	0.36	0.36
4523	ENSDARG00000114589	jam3a	21	1.06	-0.8	0.95	-1.16	-0.05	0.36	1
127	ENSDARG00000044241	dram2b	1	-1.09	1.12	-0.96	0.77	0.16	0.35	-1.12
3613	ENSDARG00000014806	hacd2	19	1.41	-0.21	0.53	-0.56	-1.17	0.35	1.7
1447	ENSDARG00000104636	si:dkey-112a7.4	3	-0.78	0.07	-0.7	-0.28	1.68	0.35	-2.38
1657	ENSDARG00000094984	si:ch211-197g15.8	4	-1.52	0.4	-0.16	0.05	1.22	0.35	-1.38
5154	ENSDARG00000060469	pik3r4	22	1.75	-0.43	-0.33	-0.78	-0.21	0.35	-0.12
5239	ENSDARG00000079905	mark2a	22	1.71	-0.41	0.03	-0.76	-0.57	0.35	0.6
5256	ENSDARG00000070083	atp5f1b	22	1.7	-0.46	0.07	-0.81	-0.5	0.35	0.57
93	ENSDARG00000022684	fkbp1aa	1	-0.86	1.22	-0.27	0.87	-0.96	0.35	0.69
272	ENSDARG00000078114	si:ch73-237c6.1	1	-1.63	0.73	-0.26	0.38	0.77	0.35	-1.03
683	ENSDARG00000078654	tpx2	1	-0.78	1.24	-0.94	0.89	-0.42	0.35	-0.52
737	ENSDARG00000019815	fn1a	1	-0.88	1.26	-0.7	0.91	-0.59	0.35	-0.11
748	ENSDARG00000092660	cyp27c1	1	-0.94	1.25	-0.72	0.9	-0.49	0.35	-0.23
930	ENSDARG00000057949	slc43a3b	3	-1.24	1	-0.89	0.65	0.48	0.35	-1.37
931	ENSDARG00000099411	zgc:158343	3	-1.27	0.98	-0.86	0.63	0.53	0.35	-1.39
1042	ENSDARG00000089043	ptpn6	3	-1.23	0.75	-0.9	0.4	0.98	0.35	-1.88
1417	ENSDARG00000103824	hint1	3	-1.24	0.41	-0.61	0.06	1.38	0.35	-1.99
1364	ENSDARG00000068404	tbcb	3	-1.42	0.1	0.22	-0.25	1.36	0.35	-1.14
1441	ENSDARG00000008182	si:ch73-111e15.1	3	-0.93	0.04	-0.47	-0.31	1.68	0.35	-2.15
2231	ENSDARG00000105450	si:ch211-63p21.1	6	-0.68	-0.52	0.6	-0.87	1.47	0.35	-0.87
2535	ENSDARG00000070161	vamp3	9	0.31	-0.02	1.42	-0.37	-1.33	0.35	2.75
3032	ENSDARG00000077567	angel1	16	1.69	0.03	-0.57	-0.32	-0.84	0.35	0.27
3036	ENSDARG00000025507	wdr24	16	1.75	-0.1	-0.5	-0.45	-0.69	0.35	0.19
3146	ENSDARG00000056468	asb16	16	1.75	-0.28	-0.19	-0.63	-0.66	0.35	0.47
3664	ENSDARG00000034685	tmem198b	19	1.53	-0.13	0.24	-0.48	-1.16	0.35	1.4
4132	ENSDARG00000076334	mrpl43	20	1.49	-0.62	0.51	-0.97	-0.41	0.35	0.92
4133	ENSDARG00000006497	rtn1a	20	1.48	-0.63	0.53	-0.98	-0.4	0.35	0.93
4196	ENSDARG00000045442	cpb1	20	1.57	-0.27	0.31	-0.62	-0.99	0.35	1.3
4445	ENSDARG00000037679	zgc:103678	21	0.53	-0.87	1.14	-1.22	0.42	0.35	0.72
4566	ENSDARG00000054597	cnot6l	21	1.11	-0.82	0.84	-1.17	0.05	0.35	0.79
4868	ENSDARG00000033789	ndufb7	22	1.17	-0.83	0.08	-1.18	0.75	0.35	-0.67
5138	ENSDARG00000043182	hhla2a.1	22	1.65	-0.6	0.05	-0.95	-0.15	0.35	0.2
464	ENSDARG00000067851	lcn15	1	-1.22	1.14	-0.77	0.79	0.05	0.35	-0.82
4604	ENSDARG00000069494	tmem223	21	1.31	-0.79	0.59	-1.14	0.03	0.35	0.56
2656	ENSDARG00000078551	zgc:171242	11	-0.27	-0.74	1.08	-1.08	1.01	0.34	0.07
4648	ENSDARG00000068738	cox5b2	21	1.32	-0.77	0.64	-1.11	-0.07	0.34	0.71
5117	ENSDARG00000012072	dmac2l	22	1.49	-0.71	0.38	-1.05	-0.12	0.34	0.5
5221	ENSDARG00000103318	mrpl3	22	1.59	-0.58	0.34	-0.92	-0.43	0.34	0.77
2913	ENSDARG00000111753	hist1h4l	16	1.41	0.14	0.05	-0.2	-1.4	0.34	1.45
5240	ENSDARG00000010149	atp5fa1	22	1.7	-0.43	0.07	-0.77	-0.56	0.34	0.63
222	ENSDARG00000075989	arpc2	1	-1.51	0.95	-0.49	0.61	0.44	0.34	-0.93
223	ENSDARG00000075851	oafa	1	-1.48	0.99	-0.53	0.65	0.36	0.34	-0.89
625	ENSDARG00000006409	mapk12b	1	-1.06	1.18	-0.88	0.84	-0.08	0.34	-0.8
626	ENSDARG00000100019	arhgap11a	1	-1.02	1.16	-0.96	0.82	0	0.34	-0.96
1097	ENSDARG00000078249	unc13d	3	-1.4	0.89	-0.71	0.55	0.67	0.34	-1.38
1096	ENSDARG00000005463	slc30a1a	3	-1.39	0.88	-0.72	0.54	0.69	0.34	-1.41
946	ENSDARG00000045190	ch25h	3	-1.08	0.82	-1.09	0.48	0.87	0.34	-1.96
1138	ENSDARG00000076789	cx32.2	3	-1.26	0.57	-0.75	0.23	1.21	0.34	-1.96
1416	ENSDARG00000053131	irak3	3	-1.26	0.41	-0.6	0.07	1.38	0.34	-1.98
1361	ENSDARG00000009511	tnfa	3	-1.16	0.09	-0.27	-0.25	1.59	0.34	-1.86
3611	ENSDARG00000013477	gata1a	19	1.34	-0.24	0.66	-0.58	-1.17	0.34	1.83
3665	ENSDARG00000002971	phc1	19	1.56	-0.07	0.1	-0.41	-1.18	0.34	1.28
4079	ENSDARG00000000370	triob	20	1.44	-0.51	0.65	-0.85	-0.72	0.34	1.37
4105	ENSDARG00000090389	ndufv3	20	1.39	-0.62	0.71	-0.96	-0.52	0.34	1.23
4116	ENSDARG00000026801	stau2	20	1.36	-0.67	0.72	-1.01	-0.4	0.34	1.12
4541	ENSDARG00000017422	apmap	21	1.08	-0.65	1.08	-0.99	-0.53	0.34	1.61
4836	ENSDARG00000075850	gnal2	22	1.68	-0.54	-0.3	-0.88	0.04	0.34	-0.34
5182	ENSDARG00000096749	NDUFAF8	22	1.7	-0.53	-0.05	-0.87	-0.25	0.34	0.2
5222	ENSDARG00000054588	cox6a2	22	1.55	-0.62	0.4	-0.96	-0.37	0.34	0.77
243	ENSDARG00000026829	cotl1	1	-1.29	1.05	-0.79	0.72	0.32	0.33	-1.11
1123	ENSDARG00000093493	urp1	3	-1.54	0.56	-0.31	0.23	1.07	0.33	-1.38
1137	ENSDARG00000067672	card9	3	-1.24	0.56	-0.77	0.23	1.22	0.33	-1.99
2638	ENSDARG00000094922	ungb	11	-0.67	-0.48	1.59	-0.81	0.37	0.33	1.22
3732	ENSDARG00000087421	serbp1b	19	1.6	-0.35	0.31	-0.68	-0.87	0.33	1.18
4118	ENSDARG00000044942	mrpl45	20	1.39	-0.69	0.66	-1.02	-0.34	0.33	1
5118	ENSDARG00000102906	hibadha	22	1.5	-0.7	0.4	-1.03	-0.17	0.33	0.57
1346	ENSDARG00000105023	selplg	3	-1.26	0.22	-0.34	-0.11	1.5	0.33	-1.84
1410	ENSDARG00000015623	ada2b	3	-1.07	0.17	-0.53	-0.16	1.59	0.33	-2.12
2959	ENSDARG00000030871	siah1	16	1.61	0.07	-0.29	-0.26	-1.12	0.33	0.83
5238	ENSDARG00000022413	ing5a	22	1.72	-0.43	0.01	-0.76	-0.54	0.33	0.55
5245	ENSDARG00000012563	pdss2	22	1.69	-0.41	0.1	-0.74	-0.64	0.33	0.74
430	ENSDARG00000021022	ift57	1	-1.62	0.95	0.26	0.62	-0.21	0.33	0.47
453	ENSDARG00000037846	hm13	1	-1.62	0.98	-0.07	0.65	0.06	0.33	-0.13
513	ENSDARG00000098799	si:ch211-194m7.5	1	-1.16	1.2	-0.6	0.87	-0.31	0.33	-0.29
1095	ENSDARG00000092903	zgc:153317	3	-1.39	0.86	-0.73	0.53	0.72	0.33	-1.45
1038	ENSDARG00000074776	tmem154	3	-1.25	0.69	-0.85	0.36	1.05	0.33	-1.9
1419	ENSDARG00000088631	BX000363.1	3	-1.23	0.3	-0.5	-0.03	1.46	0.33	-1.96
3053	ENSDARG00000104654	leap2	16	1.69	-0.14	-0.14	-0.47	-0.94	0.33	0.8
3897	ENSDARG00000067984	gas1b	20	1.06	-0.08	0.84	-0.41	-1.41	0.33	2.25
4399	ENSDARG00000037070	tmem242	20	1.62	-0.49	0.3	-0.82	-0.61	0.33	0.91
4401	ENSDARG00000102412	eci2	20	1.61	-0.54	0.32	-0.87	-0.53	0.33	0.85
4538	ENSDARG00000077967	si:ch211-140m22.7	21	0.85	-0.68	1.27	-1.01	-0.43	0.33	1.7
220	ENSDARG00000040917	cbfb	1	-1.5	1.01	-0.45	0.69	0.25	0.32	-0.7
244	ENSDARG00000005551	hnrnph1l	1	-1.32	1.03	-0.76	0.71	0.35	0.32	-1.11
1091	ENSDARG00000060094	ptgis	3	-1.38	0.81	-0.74	0.49	0.81	0.32	-1.55
3882	ENSDARG00000102878	mapre3b	20	1.14	-0.79	0.9	-1.11	-0.14	0.32	1.04
4288	ENSDARG00000102538	mccc1	20	1.73	-0.36	-0.06	-0.68	-0.62	0.32	0.56
5116	ENSDARG00000035167	mrpl48	22	1.46	-0.72	0.49	-1.04	-0.19	0.32	0.68
5227	ENSDARG00000041413	adgrg11	22	1.65	-0.49	0.24	-0.81	-0.59	0.32	0.83
5228	ENSDARG00000017781	hsd17b10	22	1.66	-0.48	0.21	-0.8	-0.58	0.32	0.79
1420	ENSDARG00000096576	si:ch211-286b5.6	3	-1.17	0.32	-0.61	0	1.47	0.32	-2.08
1390	ENSDARG00000108060	LO017771.1	3	-1.42	0.27	-0.16	-0.05	1.37	0.32	-1.53
1345	ENSDARG00000090890	cmklr1	3	-1.25	0.18	-0.31	-0.14	1.52	0.32	-1.83
2878	ENSDARG00000104647	surf4	16	1.24	0.46	-0.41	0.14	-1.43	0.32	1.02
3092	ENSDARG00000020387	nipsnap3a	16	1.7	-0.32	0.03	-0.64	-0.77	0.32	0.8
3624	ENSDARG00000110151	ank3b	19	1.25	-0.19	0.73	-0.51	-1.27	0.32	2
4384	ENSDARG00000006408	hmgb3b	20	1.57	-0.41	0.39	-0.73	-0.82	0.32	1.21
649	ENSDARG00000008548	arhgap12a	1	-1.16	1.18	-0.7	0.86	-0.18	0.32	-0.52
1443	ENSDARG00000069843	kctd12.1	3	-0.88	0.03	-0.55	-0.29	1.69	0.32	-2.24
2211	ENSDARG00000006125	csnk1db	6	-0.92	-0.4	0.59	-0.72	1.45	0.32	-0.86
3034	ENSDARG00000045790	si:ch211-125a15.1	16	1.69	-0.03	-0.38	-0.35	-0.93	0.32	0.55
3086	ENSDARG00000061145	gfod2	16	1.72	-0.25	-0.11	-0.57	-0.79	0.32	0.68
3627	ENSDARG00000053362	cilp	19	1.23	-0.37	0.88	-0.69	-1.05	0.32	1.93
28	ENSDARG00000044001	lgals3b	1	-1.17	0.88	0.73	0.57	-1.01	0.31	1.74
203	ENSDARG00000023185	si:rp71-1g18.13	1	-1.58	0.81	-0.4	0.5	0.67	0.31	-1.07
1110	ENSDARG00000006003	mycla	3	-1.41	0.53	-0.53	0.22	1.19	0.31	-1.72
1150	ENSDARG00000040445	si:ch211-219a4.3	3	-1.26	0.46	-0.67	0.15	1.32	0.31	-1.99
3084	ENSDARG00000078315	zgc:110063	16	1.7	-0.22	-0.08	-0.53	-0.87	0.31	0.79
4117	ENSDARG00000109233	bmp10l	20	1.35	-0.71	0.72	-1.02	-0.34	0.31	1.06
4124	ENSDARG00000099746	rgs3a	20	1.52	-0.6	0.49	-0.91	-0.5	0.31	0.99
4125	ENSDARG00000070589	mrpl35	20	1.51	-0.59	0.52	-0.9	-0.55	0.31	1.07
4605	ENSDARG00000101619	micos10	21	1.34	-0.8	0.58	-1.11	-0.01	0.31	0.59
5106	ENSDARG00000055151	smyd2a	22	1.45	-0.77	0.36	-1.08	0.04	0.31	0.32
1407	ENSDARG00000089569	pstpip2	3	-1.04	0.26	-0.7	-0.05	1.53	0.31	-2.23
3044	ENSDARG00000002523	hsdl2	16	1.74	-0.19	-0.29	-0.5	-0.76	0.31	0.47
3892	ENSDARG00000098257	pcdh15a	20	1.16	-0.05	0.68	-0.36	-1.43	0.31	2.11
13	ENSDARG00000076004	ppp2r3b	1	-1.63	0.84	0.53	0.53	-0.27	0.31	0.8
734	ENSDARG00000093089	tac3a	1	-0.82	1.24	-0.63	0.93	-0.72	0.31	0.09
1113	ENSDARG00000053568	pstpip1b	3	-1.39	0.47	-0.5	0.16	1.26	0.31	-1.76
2762	ENSDARG00000043795	arhgdia	15	-0.08	1.17	-0.99	0.86	-0.95	0.31	-0.04
2840	ENSDARG00000028017	tp53inp1	16	0.76	0.83	-0.71	0.52	-1.4	0.31	0.69
5119	ENSDARG00000115717	pigbos1	22	1.56	-0.68	0.29	-0.99	-0.18	0.31	0.47
5123	ENSDARG00000079578	rbpms2b	22	1.56	-0.65	0.35	-0.96	-0.3	0.31	0.65
240	ENSDARG00000021242	mvp	1	-1.24	1.05	-0.85	0.75	0.29	0.3	-1.14
1149	ENSDARG00000088283	si:ch73-248e21.5	3	-1.27	0.46	-0.66	0.16	1.31	0.3	-1.97
2833	ENSDARG00000096678	si:dkey-263j23.1	15	0.01	0.65	0.7	0.35	-1.72	0.3	2.42
3052	ENSDARG00000100631	klhl12	16	1.7	-0.15	-0.17	-0.45	-0.92	0.3	0.75
3080	ENSDARG00000031657	fahd1	16	1.65	-0.04	-0.2	-0.34	-1.07	0.3	0.87
4084	ENSDARG00000101057	srsf7b	20	1.46	-0.48	0.6	-0.78	-0.81	0.3	1.41
4104	ENSDARG00000060518	pcsk5b	20	1.41	-0.62	0.69	-0.92	-0.55	0.3	1.24
4422	ENSDARG00000077728	supv3l1	21	0.63	-0.94	0.78	-1.24	0.76	0.3	0.02
5212	ENSDARG00000092473	apopt1	22	1.59	-0.62	0.32	-0.92	-0.37	0.3	0.69
1046	ENSDARG00000020929	fam49ba	3	-1.4	0.75	-0.7	0.45	0.9	0.3	-1.6
1039	ENSDARG00000067916	lyn	3	-1.3	0.62	-0.76	0.32	1.12	0.3	-1.88
1678	ENSDARG00000111612	mapkapk3	4	-1.76	0.6	0.22	0.3	0.64	0.3	-0.42
2581	ENSDARG00000099197	actc1b	11	-0.64	-0.07	1.74	-0.37	-0.66	0.3	2.4
2876	ENSDARG00000022891	zgc:175214	16	1.19	0.59	-0.87	0.29	-1.19	0.3	0.32
3898	ENSDARG00000086685	trim63b	20	0.97	-0.14	0.98	-0.44	-1.37	0.3	2.35
3901	ENSDARG00000074546	si:ch211-213a13.2	20	1.1	0.12	0.54	-0.18	-1.57	0.3	2.11
221	ENSDARG00000039914	gapdhs	1	-1.5	0.94	-0.5	0.64	0.43	0.3	-0.93
411	ENSDARG00000029150	hsp90ab1	1	-1.36	1.13	-0.2	0.83	-0.39	0.3	0.19
456	ENSDARG00000054292	si:ch211-14a17.11	1	-1.62	0.95	-0.16	0.65	0.17	0.3	-0.33
482	ENSDARG00000054749	lmo4b	1	-1.33	1.13	-0.51	0.83	-0.12	0.3	-0.39
698	ENSDARG00000103996	spdl1	1	-0.98	1.19	-0.88	0.89	-0.23	0.3	-0.65
756	ENSDARG00000015998	wdhd1	1	-1.06	1.21	-0.55	0.91	-0.52	0.3	-0.03
4107	ENSDARG00000015050	calm3a	20	1.41	-0.66	0.67	-0.96	-0.46	0.3	1.13
4285	ENSDARG00000052462	pisd	20	1.72	-0.4	-0.01	-0.7	-0.61	0.3	0.6
4446	ENSDARG00000068214	ccni	21	0.58	-0.89	1.15	-1.19	0.36	0.3	0.79
4563	ENSDARG00000018073	mrps22	21	0.99	-0.89	0.88	-1.19	0.2	0.3	0.68
1092	ENSDARG00000022841	ptk2ba	3	-1.37	0.81	-0.75	0.52	0.79	0.29	-1.54
1418	ENSDARG00000058045	tlr21	3	-1.29	0.38	-0.54	0.09	1.37	0.29	-1.91
3043	ENSDARG00000079738	znf219	16	1.75	-0.17	-0.36	-0.46	-0.76	0.29	0.4
3055	ENSDARG00000040039	pttg1ipb	16	1.68	-0.21	-0.02	-0.5	-0.94	0.29	0.92
3087	ENSDARG00000055053	itih1	16	1.71	-0.27	-0.06	-0.56	-0.82	0.29	0.76
3614	ENSDARG00000005540	xpo7	19	1.39	-0.24	0.57	-0.53	-1.19	0.29	1.76
4126	ENSDARG00000019117	parvb	20	1.57	-0.57	0.41	-0.86	-0.55	0.29	0.96
4398	ENSDARG00000014676	bckdhb	20	1.63	-0.52	0.28	-0.81	-0.58	0.29	0.86
4423	ENSDARG00000099532	ubl3a	21	0.57	-0.94	0.78	-1.23	0.82	0.29	-0.04
5151	ENSDARG00000051986	ndufs8a	22	1.56	-0.72	0.11	-1.01	0.07	0.29	0.04
5254	ENSDARG00000105177	ilf3b	22	1.7	-0.52	0.06	-0.81	-0.43	0.29	0.49
1045	ENSDARG00000035420	ophn1	3	-1.27	0.73	-0.86	0.44	0.96	0.29	-1.82
1049	ENSDARG00000099674	dicp3.1	3	-1.34	0.73	-0.77	0.44	0.94	0.29	-1.71
4197	ENSDARG00000020890	tmod4	20	1.57	-0.3	0.32	-0.59	-1	0.29	1.32
4293	ENSDARG00000014673	fzd9b	20	1.74	-0.31	-0.12	-0.6	-0.7	0.29	0.58
42	ENSDARG00000038863	babam2	1	-1.35	0.97	0.45	0.68	-0.75	0.29	1.2
454	ENSDARG00000019998	slc30a7	1	-1.58	0.97	-0.24	0.68	0.17	0.29	-0.41
630	ENSDARG00000091150	mki67	1	-0.9	1.18	-0.99	0.89	-0.18	0.29	-0.81
755	ENSDARG00000030759	melk	1	-0.98	1.22	-0.56	0.93	-0.61	0.29	0.05
4106	ENSDARG00000076248	ppp1r3db	20	1.41	-0.67	0.66	-0.96	-0.44	0.29	1.1
4287	ENSDARG00000038618	cpt2	20	1.74	-0.4	-0.06	-0.69	-0.59	0.29	0.53
253	ENSDARG00000045554	snx20	1	-1.47	0.92	-0.59	0.64	0.49	0.28	-1.08
762	ENSDARG00000112493	BX088712.1	1	-0.94	1.22	-0.49	0.94	-0.73	0.28	0.24
1389	ENSDARG00000076586	csf2rb	3	-1.36	0.25	-0.27	-0.03	1.41	0.28	-1.68
1964	ENSDARG00000116618	si:ch73-27e22.8	6	-0.55	-0.12	-0.68	-0.4	1.75	0.28	-2.43
2551	ENSDARG00000039041	sfrp5	10	-1.6	0.15	1.05	-0.13	0.53	0.28	0.52
2637	ENSDARG00000112052	FO907124.1	11	-0.64	-0.5	1.63	-0.78	0.3	0.28	1.33
2822	ENSDARG00000103533	clec14a	15	0.31	0.28	1.05	0	-1.65	0.28	2.7
2889	ENSDARG00000052011	rrad	16	1.4	0.39	-0.81	0.11	-1.1	0.28	0.29
4080	ENSDARG00000005374	tubgcp4	20	1.47	-0.52	0.61	-0.8	-0.75	0.28	1.36
4128	ENSDARG00000059259	pabpc4	20	1.57	-0.6	0.41	-0.88	-0.49	0.28	0.9
4129	ENSDARG00000019096	myl7	20	1.57	-0.59	0.41	-0.87	-0.51	0.28	0.92
4204	ENSDARG00000070151	nfyc	20	1.65	-0.27	0.11	-0.55	-0.94	0.28	1.05
5150	ENSDARG00000002917	gls2b	22	1.6	-0.7	0.08	-0.98	0.01	0.28	0.07
2106	ENSDARG00000108939	FQ378016.1	6	-0.69	-0.42	0.12	-0.7	1.69	0.28	-1.57
3057	ENSDARG00000014273	camk2d2	16	1.66	-0.14	-0.07	-0.42	-1.03	0.28	0.96
3629	ENSDARG00000095608	si:dkey-57k2.6	19	1.2	-0.32	0.88	-0.6	-1.16	0.28	2.04
4385	ENSDARG00000004757	ybx1	20	1.59	-0.46	0.36	-0.74	-0.76	0.28	1.12
95	ENSDARG00000015559	fstl1a	1	-0.77	1.18	-0.25	0.9	-1.06	0.28	0.81
522	ENSDARG00000092638	ptprua	1	-1.25	1.16	-0.4	0.88	-0.4	0.28	0
766	ENSDARG00000045408	tagln	1	-0.53	1.21	-0.58	0.93	-1.03	0.28	0.45
4150	ENSDARG00000041068	got2a	20	1.52	-0.66	0.46	-0.94	-0.37	0.28	0.83
4587	ENSDARG00000103659	bco1l	21	1.25	-0.88	0.32	-1.16	0.47	0.28	-0.15
4589	ENSDARG00000075881	si:ch211-39k3.2	21	1.31	-0.86	0.25	-1.14	0.44	0.28	-0.19
483	ENSDARG00000057241	tnfsf10	1	-1.31	1.12	-0.53	0.85	-0.13	0.27	-0.4
4598	ENSDARG00000075209	p4htm	21	1.37	-0.83	0.46	-1.1	0.09	0.27	0.37
4600	ENSDARG00000058821	sema5a	21	1.38	-0.82	0.47	-1.09	0.05	0.27	0.42
2267	ENSDARG00000095369	zgc:112966	6	-1	-0.41	1.33	-0.68	0.77	0.27	0.56
131	ENSDARG00000104451	slc39a7	1	-1.06	1.03	-1.06	0.76	0.33	0.27	-1.39
207	ENSDARG00000007347	degs1	1	-1.63	0.84	-0.28	0.57	0.49	0.27	-0.77
1154	ENSDARG00000015686	bmp6	3	-1.3	0.51	-0.69	0.24	1.24	0.27	-1.93
2081	ENSDARG00000011334	ncaldb	6	-0.77	-0.17	-0.36	-0.44	1.75	0.27	-2.11
3038	ENSDARG00000061257	zgc:153240	16	1.73	-0.09	-0.5	-0.36	-0.78	0.27	0.28
3265	ENSDARG00000051756	pdhx	16	1.77	-0.38	-0.31	-0.65	-0.44	0.27	0.13
3900	ENSDARG00000002084	lamb2	20	1.18	0.1	0.44	-0.17	-1.54	0.27	1.98
4108	ENSDARG00000011466	afg1la	20	1.43	-0.72	0.59	-0.99	-0.31	0.27	0.9
4148	ENSDARG00000030139	sdhdb	20	1.48	-0.69	0.54	-0.96	-0.36	0.27	0.9
4201	ENSDARG00000045885	scaf11	20	1.6	-0.25	0.2	-0.52	-1.03	0.27	1.23
4392	ENSDARG00000025074	slc25a10	20	1.56	-0.47	0.43	-0.74	-0.79	0.27	1.22
5164	ENSDARG00000029439	atp2a2a	22	1.73	-0.52	-0.08	-0.79	-0.34	0.27	0.26
1043	ENSDARG00000089933	rasal3	3	-1.28	0.71	-0.84	0.44	0.98	0.27	-1.82
1050	ENSDARG00000044039	stx11a	3	-1.34	0.71	-0.76	0.44	0.96	0.27	-1.72
208	ENSDARG00000010481	bzw1a	1	-1.65	0.83	-0.22	0.56	0.49	0.27	-0.71
525	ENSDARG00000034375	chst11	1	-1.18	1.17	-0.42	0.9	-0.47	0.27	0.05
526	ENSDARG00000039616	cenpk	1	-1.16	1.18	-0.46	0.91	-0.47	0.27	0.01
769	ENSDARG00000007836	ctsla	1	-0.61	1.19	-0.4	0.92	-1.1	0.27	0.7
1205	ENSDARG00000041792	cx28.1	3	-1.39	0.55	-0.61	0.29	1.15	0.26	-1.76
130	ENSDARG00000019236	gsr	1	-1.06	0.98	-1.1	0.72	0.45	0.26	-1.55
219	ENSDARG00000117133	cst14b.1	1	-1.49	0.97	-0.48	0.71	0.28	0.26	-0.76
241	ENSDARG00000035559	tp53	1	-1.28	1.04	-0.79	0.78	0.26	0.26	-1.05
455	ENSDARG00000071414	cybc1	1	-1.63	0.93	-0.12	0.67	0.15	0.26	-0.27
486	ENSDARG00000031511	psmb2	1	-1.44	1.04	-0.48	0.78	0.1	0.26	-0.58
1076	ENSDARG00000001953	pfkfb3	3	-1.3	0.83	-0.85	0.57	0.75	0.26	-1.6
1656	ENSDARG00000045141	aqp8a.1	4	-1.55	0.33	-0.07	0.07	1.22	0.26	-1.29
2054	ENSDARG00000103748	ovca2	6	-1.13	-0.2	0.25	-0.46	1.55	0.26	-1.3
2466	ENSDARG00000079308	tor3a	9	-1.16	0.49	1.28	0.23	-0.85	0.26	2.13
[truncated: 3,309 more rows]
