# Supplementary material for: Comparative single-cell profiling reveals distinct cardiac resident macrophages essential for zebrafish heart regeneration
Source: eLife. 2023 Jul 27;12:e84679. doi: 10.7554/eLife.84679 (PMC10411971; doi:10.7554/eLife.84679)
Supplement: Figure 2—source data 1. [file elife-84679-fig2-data1.xlsx]

## Sheet: R script
The R script for generating the zebrafish scRNAseq dataset
###zebrafish##
#workstation
setwd("/Users/ScRNAseq/ZF-scRNASeq/input")
#setup the directory
#Create folders
##data
##results
##
library(SingleCellExperiment)
library(Seurat)
library(tidyverse)
library(Matrix)
library(scales)
library(cowplot)
library(RCurl)
##Raw data-pbs7d
pbs7d.rawdata <- Read10X(data.dir = "D:/Users/ScRNAseq/ZF-scRNASeq/input/PBS7d_raw_feature_bc_matrix")
pbs7d.raw <- CreateSeuratObject(counts = pbs7d.rawdata, project = "PBS7d", min.features = 100)
###Raw data-cl7d
cl7d.rawdata <- Read10X(data.dir = "D:/Users/ScRNAseq/ZF-scRNASeq/input/CL7d_raw_feature_bc_matrix")
cl7d.raw <- CreateSeuratObject(counts = cl7d.rawdata, project = "CL7d", min.features = 100)
##Raw data-PBS3d
pbs3d.rawdata <- Read10X(data.dir = "D:/Users/ScRNAseq/ZF-scRNASeq/input/PBS3d_raw_feature_bc_matrix")
pbs3d.raw <- CreateSeuratObject(counts = pbs3d.rawdata, project = "PBS3d", min.features = 100)
###Raw data-CL3d
cl3d.rawdata <- Read10X(data.dir = "D:/Users/ScRNAseq/ZF-scRNASeq/input/CL3d_raw_feature_bc_matrix")
cl3d.raw <- CreateSeuratObject(counts = cl3d.rawdata, project = "CL3d", min.features = 100)
##Raw data-PBS1d
pbs1d.rawdata <- Read10X(data.dir = "D:/Users/ScRNAseq/ZF-scRNASeq/input/PBS1d_raw_feature_bc_matrix")
pbs1d.raw <- CreateSeuratObject(counts = pbs1d.rawdata, project = "PBS1d", min.features = 100)
###Raw data-CL1d
cl1d.rawdata <- Read10X(data.dir = "D:/Users/ScRNAseq/ZF-scRNASeq/input/CL1d_raw_feature_bc_matrix")
cl1d.raw <- CreateSeuratObject(counts = cl1d.rawdata, project = "CL1d", min.features = 100)
###Raw data-UT
ut.rawdata <- Read10X(data.dir = "D:/Users/ScRNAseq/ZF-scRNASeq/input/zfUT_raw_feature_bc_matrix")
ut.raw <- CreateSeuratObject(counts = ut.rawdata, project = "UT", min.features = 100)
##create a merged seurat object
merged_seurat <- merge(x = pbs7d.raw,
y = c(cl7d.raw, pbs3d.raw, cl3d.raw, pbs1d.raw, cl1d.raw, ut.raw),
add.cell.ids = c("PBS7d", "CL7d", "PBS3d", "CL3d", "PBS1d", "CL1d", "UN"), project = "zf_merge")
##if need to search Mt genes
grep(pattern = "^mt-", x = rownames(merged_seurat), value = TRUE)
# Create .RData object to load at any time
save(merged_seurat, file="data/zf_merged_raw_seurat.RData")
# Add number of genes per UMI for each cell to metadata
merged_seurat$log10GenesPerUMI <- log10(merged_seurat$nFeature_RNA) / log10(merged_seurat$nCount_RNA)
# Ignore if done earlier### Compute percent mito ratio (if not mt genes listed use this)
merged_seurat$mitoRatio <- PercentageFeatureSet(object = merged_seurat, pattern = "^mt-")
merged_seurat$mitoRatio <- merged_seurat@meta.data$mitoRatio / 100
# Create metadata dataframe
metadata <- merged_seurat@meta.data
# Add cell IDs to metadata
metadata$cells <- rownames(metadata)
# Rename columns
metadata <- metadata %>%
dplyr::rename(seq_folder = orig.ident,
nUMI = nCount_RNA,
nGene = nFeature_RNA)
# Create sample column
metadata$sample <- NA
metadata$sample[which(str_detect(metadata$cells, "^PBS7d_"))] <- "PBS7d"
metadata$sample[which(str_detect(metadata$cells, "^CL7d_"))] <- "CL7d"
metadata$sample[which(str_detect(metadata$cells, "^PBS3d_"))] <- "PBS3d"
metadata$sample[which(str_detect(metadata$cells, "^CL3d_"))] <- "CL3d"
metadata$sample[which(str_detect(metadata$cells, "^PBS1d_"))] <- "PBS1d"
metadata$sample[which(str_detect(metadata$cells, "^CL1d_"))] <- "CL1d"
metadata$sample[which(str_detect(metadata$cells, "^UN_"))] <- "UN"
# Add metadata back to Seurat object
merged_seurat@meta.data <- metadata
# Create .RData object to load at any time
save(merged_seurat, file="data/zf_merged_raw_seurat.RData")
merged_seurat <- readRDS("data/MAST_allmarkers_snn0.4.rds")
# Visualize the number of cell counts per sample
metadata %>%
ggplot(aes(x=sample, fill=sample)) +
geom_bar() +
theme_classic() +
theme(axis.text.x = element_text(angle = 45, vjust = 1, hjust=1)) +
theme(plot.title = element_text(hjust=0.5, face="bold")) +
ggtitle("NCells")
ggsave("Ncells_raw.png", plot = last_plot(), device = png(), scale = 1, width = 10, height = 10, units = c("in"), dpi = 300, limitsize = FALSE)
# Visualize the number UMIs/transcripts per cell
metadata %>%
ggplot(aes(color=sample, x=nUMI, fill= sample)) +
geom_density(alpha = 0.2) +
scale_x_log10() +
theme_classic() +
ylab("Cell density") +
geom_vline(xintercept = 500)
ggsave("Cell density_raw.png", plot = last_plot(), device = png(), scale = 1, width = 10, height = 10, units = c("in"), dpi = 300, limitsize = FALSE)
# Visualize the distribution of genes detected per cell via histogram
metadata %>%
ggplot(aes(color=sample, x=nGene, fill= sample)) +
geom_density(alpha = 0.2) +
theme_classic() +
scale_x_log10() +
geom_vline(xintercept = 300)
ggsave("Cell distribution raw.png", plot = last_plot(), device = png(), scale = 1, width = 10, height = 10, units = c("in"), dpi = 300, limitsize = FALSE)
# Visualize the distribution of genes detected per cell via boxplot
metadata %>%
ggplot(aes(x=sample, y=log10(nGene), fill=sample)) +
geom_boxplot() +
theme_classic() +
theme(axis.text.x = element_text(angle = 45, vjust = 1, hjust=1)) +
theme(plot.title = element_text(hjust=0.5, face="bold")) +
ggtitle("NCells vs NGenes")
ggsave("Ncells vs Ngenes raw.png", plot = last_plot(), device = png(), scale = 1, width = 10, height = 10, units = c("in"), dpi = 300, limitsize = FALSE)
# Visualize the correlation between genes detected and number of UMIs and determine whether strong presence of cells with low numbers of genes/UMIs
metadata %>%
ggplot(aes(x=nUMI, y=nGene, color=mitoRatio)) +
geom_point() +
scale_colour_gradient(low = "gray90", high = "black") +
stat_smooth(method=lm) +
scale_x_log10() +
scale_y_log10() +
theme_classic() +
geom_vline(xintercept = 500) +
geom_hline(yintercept = 250) +
facet_wrap(~sample)
ggsave("NUMI vs NGene+mitoRatio raw.png", plot = last_plot(), device = png(), scale = 1, width = 12, height = 12, units = c("in"), dpi = 300, limitsize = FALSE)
# Visualize the distribution of mitochondrial gene expression detected per cell
metadata %>%
ggplot(aes(color=sample, x=mitoRatio, fill=sample)) +
geom_density(alpha = 0.2) +
scale_x_log10() +
theme_classic() +
geom_vline(xintercept = 0.2)
ggsave("Nmtgenes_raw.png", plot = last_plot(), device = png(), scale = 1, width = 10, height = 10, units = c("in"), dpi = 300, limitsize = FALSE)
# Visualize the overall complexity of the gene expression by visualizing the genes detected per UMI
metadata %>%
ggplot(aes(x=log10GenesPerUMI, color = sample, fill=sample)) +
geom_density(alpha = 0.2) +
theme_classic() +
geom_vline(xintercept = 0.8)
ggsave("log10genesperUMI_raw.png", plot = last_plot(), device = png(), scale = 1, width = 10, height = 10, units = c("in"), dpi = 300, limitsize = FALSE)
# Filter out low quality reads using selected thresholds - these will change with experiment
filtered_seurat <- subset(x = merged_seurat,
subset= (nUMI >= 400) &
(nGene >= 200) &
(log10GenesPerUMI > 0.75) &
(mitoRatio < 0.25))
###Gene-level filtering
# Output a logical vector for every gene on whether the more than zero counts per cell
# Extract counts
counts <- GetAssayData(object = filtered_seurat, slot = "counts")
# Output a logical vector for every gene on whether the more than zero counts per cell
nonzero <- counts > 0
# Sums all TRUE values and returns TRUE if more than 10 TRUE values per gene
keep_genes <- Matrix::rowSums(nonzero) >= 10
# Only keeping those genes expressed in more than 10 cells
filtered_counts <- counts[keep_genes, ]
# Reassign to filtered Seurat object
filtered_seurat <- CreateSeuratObject(filtered_counts, meta.data = filtered_seurat@meta.data)
# Save filtered subset to new metadata
metadata_clean <- filtered_seurat@meta.data
###########filter QC
# Visualize the number of cell counts per sample
metadata_clean %>%
ggplot(aes(x=sample, fill=sample)) +
geom_bar() +
theme_classic() +
theme(axis.text.x = element_text(angle = 45, vjust = 1, hjust=1)) +
theme(plot.title = element_text(hjust=0.5, face="bold")) +
ggtitle("NCells")
ggsave("Ncells_QC.png", plot = last_plot(), device = png(), scale = 1, width = 10, height = 10, units = c("in"), dpi = 300, limitsize = FALSE)
# Visualize the number UMIs/transcripts per cell
metadata_clean %>%
ggplot(aes(color=sample, x=nUMI, fill= sample)) +
geom_density(alpha = 0.2) +
scale_x_log10() +
theme_classic() +
ylab("Cell density") +
geom_vline(xintercept = 400)
ggsave("Cell density_QC.png", plot = last_plot(), device = png(), scale = 1, width = 10, height = 10, units = c("in"), dpi = 300, limitsize = FALSE)
# Visualize the distribution of genes detected per cell via histogram
metadata_clean %>%
ggplot(aes(color=sample, x=nGene, fill= sample)) +
geom_density(alpha = 0.2) +
theme_classic() +
scale_x_log10() +
geom_vline(xintercept = 300)
ggsave("Cell distribution QC.png", plot = last_plot(), device = png(), scale = 1, width = 10, height = 10, units = c("in"), dpi = 300, limitsize = FALSE)
# Visualize the distribution of genes detected per cell via boxplot
metadata_clean %>%
ggplot(aes(x=sample, y=log10(nGene), fill=sample)) +
geom_boxplot() +
theme_classic() +
theme(axis.text.x = element_text(angle = 45, vjust = 1, hjust=1)) +
theme(plot.title = element_text(hjust=0.5, face="bold")) +
ggtitle("NCells vs NGenes")
ggsave("Ncells vs Ngenes QC.png", plot = last_plot(), device = png(), scale = 1, width = 10, height = 10, units = c("in"), dpi = 300, limitsize = FALSE)
# Visualize the correlation between genes detected and number of UMIs and determine whether strong presence of cells with low numbers of genes/UMIs
metadata_clean %>%
ggplot(aes(x=nUMI, y=nGene, color=mitoRatio)) +
geom_point() +
scale_colour_gradient(low = "gray90", high = "black") +
stat_smooth(method=lm) +
scale_x_log10() +
scale_y_log10() +
theme_classic() +
geom_vline(xintercept = 500) +
geom_hline(yintercept = 250) +
facet_wrap(~sample)
ggsave("NUMI vs NGene+mitoRatio QC.png", plot = last_plot(), device = png(), scale = 1, width = 12, height = 12, units = c("in"), dpi = 300, limitsize = FALSE)
# Visualize the distribution of mitochondrial gene expression detected per cell
metadata_clean %>%
ggplot(aes(color=sample, x=mitoRatio, fill=sample)) +
geom_density(alpha = 0.2) +
scale_x_log10() +
theme_classic() +
geom_vline(xintercept = 0.2)
ggsave("Nmtgenes_QC.png", plot = last_plot(), device = png(), scale = 1, width = 10, height = 10, units = c("in"), dpi = 300, limitsize = FALSE)
# Visualize the overall complexity of the gene expression by visualizing the genes detected per UMI
metadata_clean %>%
ggplot(aes(x=log10GenesPerUMI, color = sample, fill=sample)) +
geom_density(alpha = 0.2) +
theme_classic() +
geom_vline(xintercept = 0.8)
ggsave("log10genesperUMI_QC.png", plot = last_plot(), device = png(), scale = 1, width = 10, height = 10, units = c("in"), dpi = 300, limitsize = FALSE)
# Create .RData object to load at any time
save(filtered_seurat, file="data/seurat_raw_cleaned.RData")
###create cell cycle genes
#check the R script for cell cylce scoring
###create cell cycle genes
#check the R script for cell cylce scoring
# cell cycle genes for organism at ensembl. Read it in with:
library(readxl)
drerio_cell_cycle <- read_excel("D:/Users/ScRNAseq/ZF-scRNASeq/drerio cycle genes.xlsx")
View(drerio_cell_cycle)
cell_cycle_genes <- drerio_cell_cycle
# Acquire the S phase genes
s_genes <- cell_cycle_genes %>%
dplyr::filter(phase == "S") %>%
pull("geneID")
# Acquire the G2M phase genes
g2m_genes <- cell_cycle_genes %>%
dplyr::filter(phase == "G2/M") %>%
pull("geneID")
# Score cells for cell cycle
seurat_phase <- CellCycleScoring(filtered_seurat,
g2m.features = g2m_genes,
s.features = s_genes)
#View(seurat_phase@meta.data)
seurat_phase <- FindVariableFeatures(seurat_phase, verbose = F)
seurat_phase <- ScaleData(seurat_phase)
seurat_phase <- RunPCA(seurat_phase)
DimPlot(seurat_phase, reduction = "pca", group.by = "Phase", split.by = "Phase")
ggsave("cellcycle-scoring.png", plot = last_plot(), device = png(), scale = 1, width = 10, height = 10, units = c("in"), dpi = 300, limitsize = FALSE)
#continue after loading library packages
# Split seurat object by condition to perform cell cycle scoring and SCT on all samples
split_seurat <- SplitObject(filtered_seurat, split.by = "sample")
split_seurat <- split_seurat[c("PBS7d", "CL7d", "PBS3d", "CL3d","PBS1d", "CL1d", "UN")]
for (i in 1:length(split_seurat)) {
split_seurat[[i]] <- NormalizeData(split_seurat[[i]], verbose = TRUE)
split_seurat[[i]] <- CellCycleScoring(split_seurat[[i]], g2m.features=g2m_genes, s.features=s_genes)
split_seurat[[i]] <- SCTransform(split_seurat[[i]], vars.to.regress = c("mitoRatio"))
}
options(future.globals.maxSize = 8000 * 1024^2)
#Integration of DataSets ###
integ_features <- SelectIntegrationFeatures(object.list = split_seurat, nfeatures = 3000)
split_seurat <- PrepSCTIntegration(object.list = split_seurat, anchor.features = integ_features, verbose = T)
integ_anchors <- FindIntegrationAnchors(object.list = split_seurat, normalization.method = "SCT", anchor.features = integ_features, verbose = F)
Integrated_Seurat <- IntegrateData(anchorset = integ_anchors, normalization.method = "SCT", verbose = T)
#Save integrated seurat object
saveRDS(Integrated_Seurat, "results/integrated_seurat.rds")
#save
save(split_seurat, file="data/split_seurat.RData")
#Run PCA on integrated dataset
Integrated_Seurat <- RunPCA(object = Integrated_Seurat)
PCAPlot(Integrated_Seurat, split.by = "sample", verbose = F)
DimHeatmap(Integrated_Seurat, dims = 1:9, cells = 500, balanced = T)
print(x = Integrated_Seurat[["pca"]], dims = 1:10, nfeatures = 5)
ElbowPlot(object = Integrated_Seurat, ndims = 40)
#Run UMAP on integrated dataset
Integrated_Seurat <- RunUMAP(Integrated_Seurat, dims = 1:40)
DimPlot(Integrated_Seurat)
DimPlot(Integrated_Seurat, split.by = "sample")
ggsave("umap_sample.png", plot = last_plot(), device = png(), scale = 1, width = 12, height = 8, units = c("in"), dpi = 300, limitsize = FALSE)
#Clustering###
Integrated_Seurat <- FindNeighbors(object = Integrated_Seurat, dims = 1:40)
Integrated_Seurat <- FindClusters(object = Integrated_Seurat, resolution = c(0.2, 0.4, 0.6, 0.8, 1.0, 1.4))
saveRDS(Integrated_Seurat, "results/integrated_seurat_clustered.rds")
Integrated_Seurat@meta.data %>%
View()
Integrated_Seurat <- readRDS("results/integrated_seurat_clustered.rds")
#Resolution 0.2
Idents(object = Integrated_Seurat) <- "integrated_snn_res.0.2"
Integrated_Seurat <- RunUMAP(Integrated_Seurat, reduction = "pca", dims = 1:40)
DimPlot(Integrated_Seurat,
reduction = "umap",
label = TRUE,
label.size = 4)
ggsave("umap_snn0.2.png", plot = last_plot(), device = png(), scale = 1, width = 8, height = 8, units = c("in"), dpi = 300, limitsize = FALSE)
#Resolution 0.4
Idents(object = Integrated_Seurat) <- "integrated_snn_res.0.4"
Integrated_Seurat <- RunUMAP(Integrated_Seurat, reduction = "pca", dims = 1:40)
DimPlot(Integrated_Seurat,
reduction = "umap",
label = TRUE,
label.size = 4)
ggsave("umap_snn0.4.png", plot = last_plot(), device = png(), scale = 1, width = 8, height = 8, units = c("in"), dpi = 300, limitsize = FALSE)
#Resolution 0.6
Idents(object = Integrated_Seurat) <- "integrated_snn_res.0.6"
DimPlot(Integrated_Seurat,
reduction = "umap",
label = TRUE,
label.size = 4)
ggsave("umap_snn0.6.png", plot = last_plot(), device = png(), scale = 1, width = 8, height = 8, units = c("in"), dpi = 300, limitsize = FALSE)
#Resolution 0.8
Idents(object = Integrated_Seurat) <- "integrated_snn_res.0.8"
DimPlot(Integrated_Seurat,
reduction = "umap",
label = TRUE,
label.size = 4)
ggsave("umap_snn0.8.png", plot = last_plot(), device = png(), scale = 1, width = 8, height = 8, units = c("in"), dpi = 300, limitsize = FALSE)
#Resolution 1.0
Idents(object = Integrated_Seurat) <- "integrated_snn_res.1"
DimPlot(Integrated_Seurat,
reduction = "umap",
label = TRUE,
label.size = 4)
ggsave("umap_snn1.0.png", plot = last_plot(), device = png(), scale = 1, width = 8, height = 8, units = c("in"), dpi = 300, limitsize = FALSE)
#Resolution 1.4
Idents(object = Integrated_Seurat) <- "integrated_snn_res.1.4"
DimPlot(Integrated_Seurat,
reduction = "umap",
label = TRUE,
label.size = 4)
ggsave("umap_snn1.4.png", plot = last_plot(), device = png(), scale = 1, width = 8, height = 8, units = c("in"), dpi = 300, limitsize = FALSE)
#Revisit QC metrics
Idents(object = Integrated_Seurat) <- "integrated_snn_res.0.4"
metrics <- c("nUMI", "nGene", "S.Score", "G2M.Score", "mitoRatio")
FeaturePlot(Integrated_Seurat, reduction = "umap", features = metrics, pt.size = 0.4, sort.cell = T, min.cutoff = "q10", label = T)
ggsave("umap_metrics.png", plot = last_plot(), device = png(), scale = 1, width = 10, height = 10, units = c("in"), dpi = 300, limitsize = FALSE)
#Marker identification
Idents(object = Integrated_Seurat) <- "integrated_snn_res.0.4"
DefaultAssay(Integrated_Seurat) <- "RNA"
Integrated_Seurat <- NormalizeData(Integrated_Seurat, verbose = FALSE)
##marker UMAP plots##
FeaturePlot(Integrated_Seurat,
features = c("mpx", "mpeg1.1", "mpeg1.2", "spi1a", "spi1b","csf1ra",
"csf1rb", "coro1a", "apoeb", "pax5", "cd79a", "vegfc", "vegfaa",
"cd37", "cd4-1", "lck", "cd28", "irf8", "timp4.3",
"foxp3a", "kdrl", "mertka", "itga2a", "gp1bb", "mki67", "top2a","cd74a", "cd74b", "cebpb","ccr2","itgam", "hepacam2", "syngr3b","postna","igic1s1", "alas2","slc4a1a"),
label = TRUE, label.size = 2, order = T)
ggsave("umap_Myloeid_markers.png", plot = last_plot(), device = png(), scale = 1, width = 15, height = 25, units = c("in"), dpi = 300, limitsize = FALSE)
#split command
FeaturePlot(Integrated_Seurat,
features = c("mpx", "mpeg1.1"),
label = TRUE, label.size = 2, order = T, split.by = "sample", ncol = 3, blend = TRUE)
ggsave("umap_Myloeid_split-mpx-mpeg1.png", plot = last_plot(), device = png(), scale = 1, width = 25, height = 12, units = c("in"), dpi = 300, limitsize = FALSE)
#double
FeaturePlot(Integrated_Seurat,
features = c("mpx", "mpeg1.1"),
label = TRUE, label.size = 2, order = T, split.by = "sample", ncol = 3, blend = TRUE)
ggsave("umap_Myloeid_split-mpx-mpeg1-blend.png", plot = last_plot(), device = png(), scale = 1, width = 15, height = 25, units = c("in"), dpi = 300, limitsize = FALSE)
#or
DotPlot(Integrated_Seurat, features = c("mpx", "mpeg1.1", "mpeg1.2", "mpeg1.3", "spi1a", "spi1b","csf1ra", "csf1rb", "coro1a", "apoeb"), col.min = 0, col.max = 2.5) + RotatedAxis()
# Extract identity and sample information from seurat object to determine the number of cells per cluster per sample
n_cells <- FetchData(Integrated_Seurat,
vars = c("ident", "orig.ident")) %>%
dplyr::count(ident, orig.ident) %>%
tidyr::spread(ident, n)
# View table
View(n_cells)
#csv
write.csv(n_cells,file = "cellpercluster_snn0.4.csv")
#Find DEGs
seurat_integrated_markers <- FindAllMarkers(Integrated_Seurat, only.pos = TRUE, min.pct = 0.25, logfc.threshold = 0.25, test.use = "MAST")
saveRDS(seurat_integrated_markers, "results/MAST_allmarkers_snn0.4.rds")
write.csv(seurat_integrated_markers, "MAST_allmarkers_snn0.4.rds")
write.csv(seurat_integrated_markers, file = "norm_MAST_allmarkers_snn0.4_220304.csv")
MAST_top25 <- seurat_integrated_markers %>% group_by(cluster) %>% top_n(n = 25, wt = avg_log2FC)
write.csv(MAST_top25, file = "MAST_allmarkers_snn0.4_top25.csv")
write.csv(MAST_top25, file = "norm_MAST_allmarkers_snn0.4_220304_top25.csv")
#loadmarkerRds
seurat_integrated_markers <- readRDS("results/MAST_allmarkers_snn0.4.rds")
#top50
MAST_top50 <- seurat_integrated_markers %>% group_by(cluster) %>% top_n(n = 50, wt = avg_logFC)
#write.csv(MAST_top50, file = "MAST_allmarkers_snn0.4_top50.csv")

## Sheet: cell cycle regression
R script for cell cycle regression
###create cell cycle genes
#check the R script for cell cylce scoring
###create cell cycle genes
#check the R script for cell cylce scoring
# cell cycle genes for organism at ensembl. Read it in with:
library(readxl)
drerio_cell_cycle <- read_excel("drerio cycle genes.xlsx")
View(drerio_cell_cycle)
cell_cycle_genes <- drerio_cell_cycle
# Acquire the S phase genes
s_genes <- cell_cycle_genes %>%
dplyr::filter(phase == "S") %>%
pull("geneID")
# Acquire the G2M phase genes
g2m_genes <- cell_cycle_genes %>%
dplyr::filter(phase == "G2/M") %>%
pull("geneID")
# Score cells for cell cycle
seurat_phase <- CellCycleScoring(filtered_seurat,
g2m.features = g2m_genes,
s.features = s_genes)
# Regress out all cell cycle scores during data scaling
seurat_phase_CC_regression <- ScaleData(seurat_phase, vars.to.regress = c("S.Score", "G2M.Score"), features = rownames(seurat_phase))
seurat_phase_CC_regression <- RunPCA(seurat_phase_CC_regression)
seurat_phase_CC_regression <- RunUMAP(seurat_phase_CC_regression, reduction = "pca", dims = 1:40)
seurat_phase_CC_regression <- FindNeighbors(seurat_phase_CC_regression, reduction = "pca", dims = 1:40)
seurat_phase_CC_regression <- FindClusters(seurat_phase_CC_regression, resolution = 0.4)
DimPlot(seurat_phase_CC_regression, reduction = "umap", label = T) + NoLegend()
DimPlot(seurat_phase_CC_regression, reduction = "umap", split.by = "Phase", group.by = "Phase")
