# Supplementary material for: Comparative single-cell profiling reveals distinct cardiac resident macrophages essential for zebrafish heart regeneration
Source: eLife. 2023 Jul 27;12:e84679. doi: 10.7554/eLife.84679 (PMC10411971; doi:10.7554/eLife.84679)
Supplement: Figure 2—source data 2. [file elife-84679-fig2-data2.xlsx]

## Sheet: Sheet1
Gene name	p_val	avg_log2FC	pct.1	pct.2	p_val_adj	cluster
mmp13a.1	0	4.43635	0.96	0.216	0	Neu 1
lyz	0	3.96969	0.568	0.125	0	Neu 1
mmp9	0	3.70212	0.934	0.19	0	Neu 1
npsn	0	3.25153	0.828	0.114	0	Neu 1
scpp8	0	3.08662	0.936	0.155	0	Neu 1
lect2l	0	2.93204	0.992	0.368	0	Neu 1
mpx	0	2.87105	0.953	0.176	0	Neu 1
si:ch211-9d9.1	0	2.60608	0.97	0.281	0	Neu 1
raraa	0	2.58435	0.786	0.118	0	Neu 1
tcnbb	0	2.53116	0.927	0.381	0	Neu 1
arg2	0	2.47503	0.905	0.243	0	Neu 1
il6r	0	2.42389	0.911	0.313	0	Neu 1
si:ch1073-67j19.1	0	2.29838	0.629	0.181	0	Neu 1
BX908782.2	0	2.26572	0.986	0.456	0	Neu 1
zgc:77112	0	2.22753	0.947	0.285	0	Neu 1
s1pr4	0	2.14308	0.739	0.175	0	Neu 1
cfl1l	0	2.14016	0.873	0.161	0	Neu 1
thy1	0	2.08	0.898	0.251	0	Neu 1
scinlb	0	2.07216	0.948	0.364	0	Neu 1
illr4	0	2.05771	0.936	0.233	0	Neu 1
adam8a	0	2.05298	0.983	0.471	0	Neu 1
cxcr1	0	2.03358	0.778	0.156	0	Neu 1
pnp5a	0	2.01328	0.965	0.555	0	Neu 1
cd7al	0	2.00739	0.911	0.247	0	Neu 1
f5	0	1.95763	0.667	0.114	0	Neu 1
ppdpfa	0	1.9477	0.848	0.173	0	Neu 1
calm1b	0	1.93526	0.712	0.22	0	Neu 1
odc1	0	1.90983	0.837	0.34	0	Neu 1
si:ch211-264f5.2	0	1.80992	0.814	0.31	0	Neu 1
si:dkey-27h10.2	0	1.75956	0.904	0.312	0	Neu 1
si:ch73-343l4.8	0	1.75636	0.791	0.222	0	Neu 1
timp2b	0	1.71769	0.968	0.545	0	Neu 1
alox5ap	0	1.71656	0.886	0.365	0	Neu 1
nccrp1	0	1.70092	0.922	0.523	0	Neu 1
lsp1b	0	1.68661	0.683	0.21	0	Neu 1
sult2st1	0	1.68227	0.64	0.115	0	Neu 1
si:ch73-248e21.7	0	1.68022	0.808	0.308	0	Neu 1
selenow1	0	1.6629	0.972	0.771	0	Neu 1
si:dkey-102g19.3	0	1.62141	0.962	0.47	0	Neu 1
cpa5	0	1.57815	0.377	0.055	0	Neu 1
si:ch73-248e21.5	0	1.57467	0.932	0.531	0	Neu 1
slc7a3a	0	1.56055	0.593	0.132	0	Neu 1
hbegfa	0	1.5493	0.714	0.207	0	Neu 1
chia.6	0	1.53043	0.633	0.148	0	Neu 1
srgn	0	1.52889	0.988	0.73	0	Neu 1
SMIM22	0	1.52668	0.834	0.275	0	Neu 1
myh9a	0	1.52303	0.929	0.526	0	Neu 1
slc16a3	0	1.52045	0.637	0.141	0	Neu 1
si:ch211-136m16.8	0	1.51265	0.834	0.366	0	Neu 1
zgc:152863	0	1.50907	0.698	0.251	0	Neu 1
mapre1a	0	1.50881	0.936	0.583	0	Neu 1
smox	0	1.50591	0.884	0.506	0	Neu 1
mrps15	0	1.4746	0.88	0.4	0	Neu 1
si:dkey-195m11.11	0	1.47056	0.784	0.241	0	Neu 1
ca6	0	1.46448	0.566	0.068	0	Neu 1
slc2a3b	0	1.44981	0.899	0.459	0	Neu 1
tmsb1	0	1.44472	0.892	0.513	0	Neu 1
vamp8	0	1.42214	0.725	0.258	0	Neu 1
cfbl	0	1.41672	0.926	0.495	0	Neu 1
itln1	0	1.39654	0.531	0.109	0	Neu 1
stk17b	0	1.38765	0.808	0.37	0	Neu 1
atf3	0	1.35597	0.87	0.415	0	Neu 1
rab44	0	1.31371	0.83	0.445	0	Neu 1
sgk1	0	1.31228	0.697	0.368	0	Neu 1
antxr2a	0	1.31111	0.807	0.396	0	Neu 1
si:dkey-238m4.4	0	1.30293	0.492	0.072	0	Neu 1
ARF5	0	1.30132	0.674	0.334	0	Neu 1
si:ch211-193e13.5	0	1.29262	0.61	0.147	0	Neu 1
socs3b	0	1.29008	0.841	0.418	0	Neu 1
vsir	0	1.28634	0.901	0.518	0	Neu 1
stk17al	0	1.28462	0.53	0.116	0	Neu 1
pgp	0	1.281	0.649	0.258	0	Neu 1
il1b	0	1.27594	0.725	0.307	0	Neu 1
lrrfip1a	0	1.26967	0.873	0.495	0	Neu 1
fcer1gl	0	1.2648	0.922	0.562	0	Neu 1
pigrl2.3	0	1.25881	0.586	0.208	0	Neu 1
lta4h	0	1.2529	0.765	0.382	0	Neu 1
icn	0	1.24108	0.875	0.677	0	Neu 1
acsl4b	0	1.24106	0.724	0.372	0	Neu 1
nfil3	0	1.23598	0.426	0.058	0	Neu 1
cox6a2	0	1.23272	0.795	0.253	0	Neu 1
pgd	0	1.23237	0.83	0.422	0	Neu 1
si:ch211-284o19.8	0	1.22773	0.777	0.26	0	Neu 1
ltb4r	0	1.22682	0.627	0.203	0	Neu 1
slc7a11	0	1.22412	0.597	0.201	0	Neu 1
hif1ab	0	1.22169	0.882	0.579	0	Neu 1
si:cabz01036022.1	0	1.22131	0.629	0.22	0	Neu 1
si:ch211-66e2.3	0	1.21833	0.846	0.413	0	Neu 1
nfil3-5	0	1.20382	0.488	0.167	0	Neu 1
cebpb	0	1.20327	0.985	0.813	0	Neu 1
si:ch211-276a23.5	0	1.18425	0.381	0.096	0	Neu 1
fybb	0	1.18273	0.834	0.447	0	Neu 1
si:ch211-8c17.2	0	1.18206	0.497	0.107	0	Neu 1
pxk	0	1.18192	0.628	0.231	0	Neu 1
itgb2	0	1.17689	0.836	0.501	0	Neu 1
xbp1	0	1.16981	0.976	0.796	0	Neu 1
HACD4	0	1.16674	0.532	0.148	0	Neu 1
spty2d1	0	1.16461	0.511	0.258	0	Neu 1
lxn	0	1.16155	0.719	0.375	0	Neu 1
si:ch1073-392o20.2	0	1.1581	0.732	0.417	0	Neu 1
lrrc15	0	1.15633	0.532	0.165	0	Neu 1
C7H19orf12.2	0	1.15215	0.356	0.06	0	Neu 1
cotl1	0	1.1491	0.976	0.821	0	Neu 1
il34	0	1.14591	0.424	0.063	0	Neu 1
adam19b	0	1.14022	0.517	0.12	0	Neu 1
g6pd	0	1.14014	0.577	0.196	0	Neu 1
sema4aa	0	1.13865	0.557	0.156	0	Neu 1
arhgdig	0	1.13214	0.946	0.728	0	Neu 1
sri	0	1.13173	0.904	0.581	0	Neu 1
hhla2a.1	0	1.13157	0.506	0.117	0	Neu 1
ponzr6	0	1.13068	0.65	0.182	0	Neu 1
zfand6	0	1.1296	0.522	0.2	0	Neu 1
csf3r	0	1.11773	0.551	0.182	0	Neu 1
spice1	0	1.11181	0.551	0.151	0	Neu 1
capgb	0	1.1062	0.843	0.456	0	Neu 1
atg16l1	0	1.09893	0.561	0.181	0	Neu 1
CU499336.2	0	1.0963	0.599	0.198	0	Neu 1
rps6kb1b	0	1.09389	0.523	0.162	0	Neu 1
triobpa	0	1.09128	0.482	0.088	0	Neu 1
cnp	0	1.08461	0.818	0.495	0	Neu 1
lasp1	0	1.07891	0.928	0.657	0	Neu 1
alas1	0	1.07005	0.772	0.477	0	Neu 1
il16	0	1.06114	0.59	0.217	0	Neu 1
rab11ba	0	1.0611	0.71	0.37	0	Neu 1
prdx5	0	1.0538	0.881	0.631	0	Neu 1
plpp1a	0	1.05289	0.568	0.215	0	Neu 1
lcp1	0	1.05091	0.92	0.639	0	Neu 1
abhd2a	0	1.05087	0.649	0.264	0	Neu 1
f8	0	1.04659	0.506	0.095	0	Neu 1
socs3a	0	1.0439	0.875	0.567	0	Neu 1
dhrs9	0	1.04385	0.56	0.21	0	Neu 1
rarga	0	1.04315	0.651	0.353	0	Neu 1
cdkn1bb	0	1.03906	0.654	0.365	0	Neu 1
batf3	0	1.03433	0.507	0.142	0	Neu 1
prkcda	0	1.0326	0.543	0.157	0	Neu 1
rhogb	0	1.03141	0.874	0.579	0	Neu 1
si:dkey-19b23.14	0	1.02394	0.515	0.126	0	Neu 1
si:dkey-79d12.5	0	1.01854	0.618	0.338	0	Neu 1
tpt1	0	1.01826	0.979	0.909	0	Neu 1
RASSF5	0	1.01825	0.616	0.269	0	Neu 1
SBNO2	0	1.01492	0.659	0.368	0	Neu 1
cdaa	0	1.00809	0.706	0.361	0	Neu 1
slc38a5a	0	1.00808	0.493	0.184	0	Neu 1
gsr	0	1.0063	0.652	0.309	0	Neu 1
si:dkey-185m8.2	0	0.999444	0.577	0.251	0	Neu 1
tktb	0	0.994637	0.636	0.305	0	Neu 1
pde4ba	0	0.983304	0.797	0.48	0	Neu 1
birc2	0	0.982219	0.702	0.465	0	Neu 1
dennd4a	0	0.975558	0.578	0.321	0	Neu 1
hopx	0	0.962761	0.666	0.285	0	Neu 1
mctp2b	0	0.961977	0.387	0.05	0	Neu 1
actb1	0	0.960617	0.989	0.915	0	Neu 1
ldlrap1a	0	0.954219	0.386	0.043	0	Neu 1
nrros	0	0.950615	0.743	0.476	0	Neu 1
reep5	0	0.949664	0.874	0.594	0	Neu 1
actb2	0	0.949185	0.998	0.989	0	Neu 1
hk2	0	0.944695	0.772	0.424	0	Neu 1
sat1a.1	0	0.94309	0.448	0.088	0	Neu 1
rps6ka1	0	0.937705	0.555	0.23	0	Neu 1
adgre5b.3.1	0	0.93446	0.414	0.17	0	Neu 1
glipr1a	0	0.933967	0.495	0.187	0	Neu 1
gpia	0	0.931417	0.778	0.469	0	Neu 1
spns3	0	0.930687	0.494	0.163	0	Neu 1
f11r.1	0	0.928306	0.654	0.383	0	Neu 1
svild	0	0.927199	0.455	0.122	0	Neu 1
spi1a	0	0.926875	0.647	0.377	0	Neu 1
rac2	0	0.92219	0.943	0.733	0	Neu 1
rab11fip4b	0	0.922176	0.595	0.29	0	Neu 1
plekhf1	0	0.921329	0.486	0.223	0	Neu 1
RASA2	0	0.909625	0.578	0.357	0	Neu 1
phtf1	0	0.907047	0.422	0.13	0	Neu 1
samsn1a	0	0.905072	0.798	0.487	0	Neu 1
add3a	0	0.900822	0.609	0.308	0	Neu 1
pfn1	0	0.898761	0.993	0.955	0	Neu 1
gig2h	0	0.896593	0.454	0.143	0	Neu 1
tnfsf18	0	0.895545	0.419	0.108	0	Neu 1
si:ch211-105j21.9	0	0.894225	0.606	0.188	0	Neu 1
gnai1	0	0.889065	0.836	0.559	0	Neu 1
map3k15	0	0.875274	0.339	0.086	0	Neu 1
tpst1	0	0.866433	0.413	0.085	0	Neu 1
gadd45ab	0	0.85518	0.415	0.121	0	Neu 1
camk1db	0	0.853584	0.418	0.094	0	Neu 1
ifngr1	0	0.851664	0.403	0.089	0	Neu 1
trib3	0	0.842461	0.619	0.377	0	Neu 1
coro1a	0	0.840956	0.95	0.759	0	Neu 1
mcl1b	0	0.840031	0.858	0.563	0	Neu 1
rhof	0	0.838863	0.455	0.116	0	Neu 1
fam76b	0	0.832879	0.559	0.345	0	Neu 1
si:dkey-117a8.4	0	0.832749	0.315	0.073	0	Neu 1
tnfaip8l2a	0	0.830589	0.566	0.303	0	Neu 1
tmem30ab	0	0.828338	0.54	0.25	0	Neu 1
sat1a.2	0	0.827204	0.966	0.834	0	Neu 1
skap2	0	0.826789	0.773	0.507	0	Neu 1
pgm1	0	0.825809	0.423	0.112	0	Neu 1
si:dkey-32n7.4	0	0.822706	0.566	0.28	0	Neu 1
itpkcb	0	0.820503	0.518	0.27	0	Neu 1
ccr12b.1	0	0.819896	0.291	0.073	0	Neu 1
si:zfos-2326c3.2	0	0.815335	0.542	0.302	0	Neu 1
ccdc88b	0	0.814579	0.718	0.45	0	Neu 1
BX936337.1	0	0.81229	0.536	0.34	0	Neu 1
fermt3b	0	0.8077	0.806	0.487	0	Neu 1
myo1f	0	0.807695	0.601	0.335	0	Neu 1
mrtfab	0	0.802551	0.487	0.248	0	Neu 1
si:zfos-741a10.3	0	0.802525	0.611	0.331	0	Neu 1
zyx	0	0.800305	0.54	0.254	0	Neu 1
gyg1a	0	0.79681	0.412	0.199	0	Neu 1
jakmip1	0	0.795963	0.38	0.075	0	Neu 1
zgc:165573	0	0.793634	0.592	0.298	0	Neu 1
zmp:0000001082	0	0.793479	0.408	0.166	0	Neu 1
itm2bb	0	0.792702	0.925	0.692	0	Neu 1
sptlc2a	0	0.792382	0.549	0.253	0	Neu 1
mid1ip1l	0	0.792095	0.528	0.26	0	Neu 1
dap	0	0.791576	0.56	0.301	0	Neu 1
stat1a	0	0.78933	0.698	0.472	0	Neu 1
si:dkey-24p1.7	0	0.784967	0.607	0.337	0	Neu 1
plek	0	0.783037	0.792	0.491	0	Neu 1
tmsb4x	0	0.782778	0.998	0.99	0	Neu 1
si:ch211-203d1.3	0	0.780135	0.486	0.206	0	Neu 1
unc13d	0	0.779155	0.627	0.352	0	Neu 1
wipf1a	0	0.775672	0.443	0.146	0	Neu 1
BX649411.1	0	0.771381	0.344	0.072	0	Neu 1
tpm1	0	0.767318	0.482	0.185	0	Neu 1
arpc3	0	0.761458	0.927	0.716	0	Neu 1
ptprr	0	0.761171	0.413	0.16	0	Neu 1
mia2	0	0.75563	0.462	0.239	0	Neu 1
gsto2	0	0.75522	0.485	0.235	0	Neu 1
homeza	0	0.753722	0.393	0.145	0	Neu 1
CR848841.1	0	0.752752	0.355	0.099	0	Neu 1
myl12.1	0	0.751041	0.937	0.748	0	Neu 1
chac1	0	0.750743	0.875	0.652	0	Neu 1
si:rp71-1g18.13	0	0.747355	0.365	0.093	0	Neu 1
mical1	0	0.746632	0.382	0.104	0	Neu 1
glo1	0	0.743635	0.692	0.442	0	Neu 1
zmp:0000001289	0	0.741943	0.342	0.133	0	Neu 1
CR318588.4	0	0.741442	0.776	0.706	0	Neu 1
prdm1b	0	0.738771	0.309	0.085	0	Neu 1
hck	0	0.735064	0.67	0.435	0	Neu 1
prdx1	0	0.734648	0.531	0.28	0	Neu 1
cmtm7	0	0.7342	0.501	0.228	0	Neu 1
tpd52l2b	0	0.733702	0.486	0.197	0	Neu 1
ripor2	0	0.731576	0.312	0.068	0	Neu 1
efhd2	0	0.729844	0.801	0.52	0	Neu 1
ostf1	0	0.728524	0.643	0.412	0	Neu 1
cnn2	0	0.728134	0.769	0.51	0	Neu 1
arhgef3l	0	0.727623	0.399	0.133	0	Neu 1
rasgrp4	0	0.724363	0.433	0.202	0	Neu 1
tlr5b	0	0.72313	0.38	0.181	0	Neu 1
CT573383.1	0	0.720562	0.299	0.06	0	Neu 1
hyal3	0	0.718479	0.318	0.043	0	Neu 1
samsn1b	0	0.718421	0.293	0.038	0	Neu 1
cab39l1	0	0.717324	0.618	0.372	0	Neu 1
CR855337.1	0	0.715964	0.464	0.261	0	Neu 1
swap70b	0	0.714627	0.567	0.345	0	Neu 1
rgs2	0	0.711854	0.59	0.368	0	Neu 1
rnf144b	0	0.709023	0.508	0.303	0	Neu 1
mcl1a	0	0.704419	0.98	0.901	0	Neu 1
rnaset2	0	0.700518	0.68	0.372	0	Neu 1
ube2al	0	0.699573	0.694	0.511	0	Neu 1
si:ch73-90p23.1	0	0.692131	0.285	0.089	0	Neu 1
arpc2	0	0.690944	0.946	0.77	0	Neu 1
ablim1a	0	0.690359	0.3	0.043	0	Neu 1
ets2	0	0.690106	0.721	0.466	0	Neu 1
cyth4a	0	0.688024	0.314	0.155	0	Neu 1
bzw1b	0	0.687669	0.8	0.634	0	Neu 1
susd1	0	0.685993	0.435	0.144	0	Neu 1
larp6a	0	0.682738	0.543	0.309	0	Neu 1
lgals9l1	0	0.676407	0.575	0.366	0	Neu 1
dub	0	0.676054	0.593	0.33	0	Neu 1
tdh	0	0.675971	0.601	0.368	0	Neu 1
lpar5a	0	0.674544	0.366	0.168	0	Neu 1
ccnl1b	0	0.674509	0.544	0.364	0	Neu 1
gadd45aa	0	0.672664	0.276	0.067	0	Neu 1
elovl1b	0	0.671584	0.816	0.579	0	Neu 1
slc30a7	0	0.670383	0.408	0.209	0	Neu 1
spi1b	0	0.667601	0.942	0.736	0	Neu 1
selp	0	0.666862	0.305	0.07	0	Neu 1
capza1b	0	0.665434	0.87	0.657	0	Neu 1
unm-sa1614	0	0.664834	0.362	0.139	0	Neu 1
slc9a3r1a	0	0.662506	0.453	0.22	0	Neu 1
tspan14	0	0.660477	0.475	0.272	0	Neu 1
zfand5b	0	0.660189	0.588	0.419	0	Neu 1
pim1	0	0.656908	0.775	0.632	0	Neu 1
pygb	0	0.656364	0.366	0.137	0	Neu 1
arpc1b	0	0.653252	0.957	0.801	0	Neu 1
gng5	0	0.651926	0.815	0.565	0	Neu 1
pitpnaa	0	0.650073	0.557	0.324	0	Neu 1
gpr84	0	0.650048	0.401	0.235	0	Neu 1
ube2d1b	0	0.646875	0.614	0.411	0	Neu 1
iqgap1	0	0.646313	0.702	0.475	0	Neu 1
itgae.2	0	0.643255	0.697	0.48	0	Neu 1
sms	0	0.642631	0.261	0.051	0	Neu 1
mhc1zba	0	0.640689	0.736	0.562	0	Neu 1
actr2a	0	0.639287	0.702	0.482	0	Neu 1
hmgb1a	0	0.638418	0.685	0.453	0	Neu 1
cfl1	0	0.634901	0.978	0.899	0	Neu 1
tubd1	0	0.634558	0.288	0.087	0	Neu 1
mmp25b	0	0.634436	0.266	0.045	0	Neu 1
ncf1	0	0.632631	0.79	0.559	0	Neu 1
msna	0	0.632143	0.956	0.779	0	Neu 1
SLC9A1	0	0.629314	0.262	0.093	0	Neu 1
smap2	0	0.629155	0.394	0.193	0	Neu 1
ahr2	0	0.628972	0.525	0.341	0	Neu 1
ndel1a	0	0.628043	0.308	0.113	0	Neu 1
myh11a	0	0.627772	0.48	0.145	0	Neu 1
grap2a	0	0.626887	0.551	0.346	0	Neu 1
yrk	0	0.626583	0.56	0.328	0	Neu 1
syngr2a	0	0.625395	0.519	0.319	0	Neu 1
stim1a	0	0.620717	0.56	0.326	0	Neu 1
cdc42l	0	0.6192	0.904	0.727	0	Neu 1
ptenb	0	0.617359	0.483	0.297	0	Neu 1
hk1	0	0.616557	0.489	0.291	0	Neu 1
sh3bgrl	0	0.616151	0.524	0.33	0	Neu 1
si:dkey-172h23.2	0	0.614222	0.541	0.335	0	Neu 1
kpna3	0	0.613979	0.496	0.346	0	Neu 1
b3gnt2b	0	0.613875	0.543	0.354	0	Neu 1
zgc:66427	0	0.61279	0.459	0.247	0	Neu 1
hsd3b7	0	0.612363	0.326	0.089	0	Neu 1
wasb	0	0.611078	0.847	0.649	0	Neu 1
fam49ba	0	0.610529	0.543	0.331	0	Neu 1
pld7	0	0.608326	0.281	0.089	0	Neu 1
gpr132b	0	0.60554	0.352	0.196	0	Neu 1
crema	0	0.603741	0.696	0.504	0	Neu 1
susd6	0	0.602851	0.453	0.253	0	Neu 1
pxna	0	0.601165	0.372	0.14	0	Neu 1
parvg	0	0.601046	0.567	0.363	0	Neu 1
CABZ01073834.1	0	0.599227	0.664	0.429	0	Neu 1
si:dkey-222f8.3	0	0.597708	0.638	0.439	0	Neu 1
def6a	0	0.596095	0.325	0.108	0	Neu 1
sh3glb1a	0	0.595568	0.475	0.294	0	Neu 1
rca2.1	0	0.595382	0.536	0.347	0	Neu 1
si:dkey-34d22.5	0	0.59437	0.373	0.167	0	Neu 1
ddx5	0	0.591977	0.902	0.73	0	Neu 1
vaspa	0	0.591767	0.392	0.153	0	Neu 1
hcls1	0	0.588239	0.773	0.566	0	Neu 1
clic1	0	0.588157	0.741	0.521	0	Neu 1
tnfrsf1a	0	0.584316	0.516	0.339	0	Neu 1
TXN	0	0.584164	0.944	0.801	0	Neu 1
apbb1ip	0	0.583761	0.572	0.371	0	Neu 1
jak1	0	0.581202	0.737	0.554	0	Neu 1
stx11a	0	0.580078	0.525	0.327	0	Neu 1
dusp1	0	0.579807	0.752	0.559	0	Neu 1
zgc:55558	0	0.577922	0.298	0.107	0	Neu 1
arhgap45b	0	0.57792	0.661	0.464	0	Neu 1
tprg1	0	0.576365	0.429	0.227	0	Neu 1
scamp2	0	0.57633	0.579	0.391	0	Neu 1
wasa	0	0.573849	0.576	0.336	0	Neu 1
cd82b	0	0.572472	0.315	0.091	0	Neu 1
id3	0	0.571906	0.582	0.318	0	Neu 1
ldha	0	0.571686	0.774	0.589	0	Neu 1
plekhg5b	0	0.569624	0.277	0.084	0	Neu 1
tet3	0	0.569531	0.363	0.228	0	Neu 1
lyn	0	0.56891	0.647	0.492	0	Neu 1
si:dkey-262k9.4	0	0.565917	0.767	0.55	0	Neu 1
gnb1b	0	0.565598	0.867	0.677	0	Neu 1
prelid3b	0	0.561639	0.827	0.65	0	Neu 1
si:ch211-214j24.10	0	0.56132	0.528	0.354	0	Neu 1
gapdh	0	0.561144	0.804	0.278	0	Neu 1
arpc4	0	0.55991	0.835	0.606	0	Neu 1
klf7b	0	0.55924	0.343	0.157	0	Neu 1
lpcat2	0	0.558046	0.308	0.102	0	Neu 1
ENSDARG00000012458	0	0.556856	0.447	0.283	0	Neu 1
si:ch73-264p11.1	0	0.555623	0.278	0.136	0	Neu 1
s100a10b	0	0.555445	0.941	0.729	0	Neu 1
mapk6	0	0.554062	0.448	0.281	0	Neu 1
sult6b1	0	0.553493	0.309	0.154	0	Neu 1
cyp4f3	0	0.552631	0.289	0.096	0	Neu 1
tpm3	0	0.55142	0.828	0.596	0	Neu 1
si:dkey-112a7.4	0	0.548771	0.656	0.449	0	Neu 1
cmip	0	0.548714	0.661	0.499	0	Neu 1
bin2b	0	0.548579	0.473	0.309	0	Neu 1
grk6	0	0.545792	0.355	0.179	0	Neu 1
rhoab	0	0.5453	0.873	0.684	0	Neu 1
mknk1	0	0.543332	0.319	0.133	0	Neu 1
pald1a	0	0.542434	0.336	0.156	0	Neu 1
ipo7	0	0.537879	0.608	0.453	0	Neu 1
arpc4l	0	0.537202	0.862	0.666	0	Neu 1
alox5a	0	0.536267	0.276	0.091	0	Neu 1
sowahd	0	0.536137	0.523	0.352	0	Neu 1
zgc:162944	0	0.535188	0.845	0.675	0	Neu 1
slc20a1b	0	0.534887	0.558	0.403	0	Neu 1
mob1a	0	0.532945	0.695	0.516	0	Neu 1
fam49bb	0	0.532833	0.533	0.351	0	Neu 1
arpc5b	0	0.532813	0.75	0.526	0	Neu 1
LECT2	0	0.531875	0.345	0.201	0	Neu 1
actn4	0	0.531147	0.401	0.208	0	Neu 1
csnk1g2b	0	0.529151	0.473	0.301	0	Neu 1
rhoaa	0	0.528674	0.781	0.588	0	Neu 1
impa1	0	0.527932	0.397	0.226	0	Neu 1
tpst1l	0	0.526324	0.278	0.105	0	Neu 1
cap1	0	0.525643	0.546	0.366	0	Neu 1
cox8a	0	0.524683	0.918	0.733	0	Neu 1
ATP11B	0	0.524461	0.369	0.19	0	Neu 1
fgd4a	0	0.523275	0.328	0.172	0	Neu 1
tpi1b	0	0.523091	0.912	0.718	0	Neu 1
eif1	0	0.522953	0.704	0.537	0	Neu 1
CR855311.1	0	0.521478	0.625	0.419	0	Neu 1
cd164	0	0.520956	0.467	0.284	0	Neu 1
si:ch211-213a13.1	0	0.519583	0.495	0.358	0	Neu 1
aldh2.2	0	0.517429	0.376	0.201	0	Neu 1
zgc:154055	0	0.515613	0.287	0.104	0	Neu 1
aif1l	0	0.514684	0.677	0.498	0	Neu 1
ube2d2	0	0.514085	0.734	0.562	0	Neu 1
cbsb	0	0.512816	0.279	0.11	0	Neu 1
pdzd8	0	0.509397	0.329	0.158	0	Neu 1
zgc:158564	0	0.509252	0.606	0.439	0	Neu 1
SGMS1	0	0.507713	0.274	0.136	0	Neu 1
GCA	0	0.504242	0.784	0.591	0	Neu 1
csnk1a1	0	0.501102	0.718	0.549	0	Neu 1
ube2d2l	0	0.499328	0.327	0.166	0	Neu 1
actn1	0	0.498257	0.295	0.088	0	Neu 1
arhgap25	0	0.496347	0.306	0.127	0	Neu 1
cyth1a.1	0	0.495755	0.519	0.358	0	Neu 1
degs1	0	0.495614	0.558	0.396	0	Neu 1
plekho2	0	0.49545	0.629	0.454	0	Neu 1
si:rp71-68n21.9	0	0.493672	0.464	0.281	0	Neu 1
gnai2a	0	0.48962	0.809	0.624	0	Neu 1
itm2cb	0	0.489503	0.309	0.156	0	Neu 1
si:ch211-139g16.8	0	0.488988	0.303	0.154	0	Neu 1
mapk11	0	0.488071	0.396	0.237	0	Neu 1
wbp2nl	0	0.487431	0.303	0.123	0	Neu 1
mapk3	0	0.483979	0.346	0.183	0	Neu 1
selenot1a	0	0.482759	0.608	0.445	0	Neu 1
pgk1	0	0.479966	0.75	0.563	0	Neu 1
higd1a	0	0.4799	0.782	0.624	0	Neu 1
plxnc1	0	0.479519	0.694	0.482	0	Neu 1
syne1b	0	0.479117	0.36	0.197	0	Neu 1
hlx1	0	0.477749	0.251	0.114	0	Neu 1
ptpn22	0	0.476555	0.301	0.135	0	Neu 1
tubb4b	0	0.475614	0.949	0.765	0	Neu 1
tagln2	0	0.475053	0.926	0.722	0	Neu 1
pi4k2b	0	0.470287	0.341	0.177	0	Neu 1
rasal3	0	0.47014	0.306	0.113	0	Neu 1
si:ch73-208g10.1	0	0.46883	0.299	0.132	0	Neu 1
top1l	0	0.468054	0.557	0.4	0	Neu 1
cdc42	0	0.467608	0.55	0.395	0	Neu 1
si:zfos-943e10.1	0	0.467462	0.33	0.189	0	Neu 1
RGS13	0	0.466243	0.295	0.143	0	Neu 1
dennd2da	0	0.465975	0.291	0.114	0	Neu 1
rdh12l	0	0.465146	0.504	0.315	0	Neu 1
fam107b	0	0.460453	0.383	0.223	0	Neu 1
si:dkeyp-19e1.3	0	0.460244	0.427	0.284	0	Neu 1
arf5	0	0.459501	0.61	0.45	0	Neu 1
asah1a	0	0.458552	0.308	0.159	0	Neu 1
nek7	0	0.4577	0.383	0.24	0	Neu 1
arhgap45a	0	0.457322	0.283	0.137	0	Neu 1
cep350	0	0.457248	0.436	0.299	0	Neu 1
cyb5a	0	0.455442	0.294	0.142	0	Neu 1
fryl	0	0.455234	0.359	0.201	0	Neu 1
cybb	0	0.454503	0.368	0.216	0	Neu 1
tiam1a	0	0.454028	0.283	0.127	0	Neu 1
si:dkey-97a13.6	0	0.451645	0.25	0.092	0	Neu 1
cib1	0	0.451304	0.614	0.446	0	Neu 1
snx18a	0	0.450692	0.307	0.176	0	Neu 1
tbc1d10c	0	0.446113	0.265	0.102	0	Neu 1
adam10a	0	0.445972	0.483	0.345	0	Neu 1
idh1	0	0.445141	0.355	0.223	0	Neu 1
h3f3b.1	0	0.443998	0.78	0.596	0	Neu 1
atf4b	0	0.44344	0.761	0.603	0	Neu 1
pak2a	0	0.442325	0.599	0.447	0	Neu 1
sh3kbp1	0	0.442118	0.416	0.262	0	Neu 1
serinc5	0	0.437059	0.32	0.183	0	Neu 1
ip6k2b	0	0.436238	0.532	0.382	0	Neu 1
mtdha	0	0.43297	0.691	0.53	0	Neu 1
snap23.1	0	0.432812	0.555	0.414	0	Neu 1
lsm4	0	0.429508	0.431	0.294	0	Neu 1
h3f3b.1.1	0	0.42874	0.887	0.697	0	Neu 1
capza1a	0	0.428119	0.737	0.591	0	Neu 1
chmp4bb	0	0.4263	0.685	0.535	0	Neu 1
mbnl1	0	0.424564	0.315	0.159	0	Neu 1
serf2	0	0.423761	0.827	0.68	0	Neu 1
ehd1a	0	0.423546	0.518	0.339	0	Neu 1
arhgef1b	0	0.423524	0.508	0.366	0	Neu 1
fmo5	0	0.421671	0.277	0.138	0	Neu 1
exoc6	0	0.418847	0.338	0.19	0	Neu 1
ddx61	0	0.417274	0.624	0.484	0	Neu 1
abracl	0	0.416088	0.735	0.557	0	Neu 1
pstpip1a	0	0.414272	0.294	0.148	0	Neu 1
h3f3d	0	0.41413	0.71	0.543	0	Neu 1
cyfip2	0	0.413409	0.253	0.068	0	Neu 1
atp1a3a	0	0.410881	0.25	0.126	0	Neu 1
si:dkey-7j14.6	0	0.410664	0.622	0.471	0	Neu 1
ppp1r18	0	0.410587	0.567	0.426	0	Neu 1
tmc6b	0	0.410391	0.255	0.093	0	Neu 1
gstp1	0	0.409364	0.634	0.447	0	Neu 1
hnrnpa0l.1	0	0.404634	0.94	0.814	0	Neu 1
gpx1a	0	0.403215	0.877	0.701	0	Neu 1
oaz1a	0	0.401768	0.864	0.707	0	Neu 1
si:ch73-234b20.5	0	0.398378	0.575	0.401	0	Neu 1
casp8	0	0.393397	0.278	0.148	0	Neu 1
cyba	0	0.390443	0.764	0.6	0	Neu 1
si:ch1073-429i10.3	0	0.389699	0.642	0.483	0	Neu 1
rhoac	0	0.388747	0.608	0.463	0	Neu 1
ccni	0	0.387901	0.896	0.764	0	Neu 1
prkab1b	0	0.383041	0.6	0.451	0	Neu 1
b2ml	0	0.381101	0.97	0.857	0	Neu 1
ptpn6	0	0.375492	0.78	0.613	0	Neu 1
napsa	0	0.375432	0.771	0.595	0	Neu 1
eno3	0	0.3698	0.901	0.741	0	Neu 1
aldocb	0	0.366348	0.728	0.527	0	Neu 1
laptm5	0	0.358688	0.942	0.774	0	Neu 1
fes	0	0.356461	0.259	0.127	0	Neu 1
hmgn2	0	0.349988	0.89	0.735	0	Neu 1
ywhabb	0	0.332517	0.731	0.571	0	Neu 1
pkma	0	0.326602	0.843	0.663	0	Neu 1
hspa8	0	0.320942	0.979	0.923	0	Neu 1
ywhaba	0	0.318301	0.841	0.68	0	Neu 1
eno1a	0	0.311926	0.797	0.614	0	Neu 1
aldoaa	0	0.307661	0.892	0.752	0	Neu 1
crip1	0	0.298233	0.95	0.803	0	Neu 1
cd63	0	0.295985	0.991	0.818	0	Neu 1
zgc:153867	0	0.282438	0.908	0.734	0	Neu 1
tln1	0	0.27839	0.898	0.719	0	Neu 1
gapdhs	0	0.274548	0.97	0.85	0	Neu 1
zgc:64051	0	0.27098	0.944	0.769	0	Neu 1
nme2b.2	0	0.256394	0.439	0.152	0	Neu 1
pdhb	1.6853e-305	0.393309	0.335	0.201	3.35628e-301	Neu 1
cox7a2a	9.38008e-305	0.302768	0.71	0.554	1.86804e-300	Neu 1
chmp2a	9.65574e-304	0.431027	0.698	0.569	1.92294e-299	Neu 1
tmem59	9.0323e-301	0.373356	0.538	0.407	1.79878e-296	Neu 1
si:ch211-196f19.1	2.5851e-296	0.462453	0.318	0.188	5.14824e-292	Neu 1
bcl2l1	1.84908e-294	0.424778	0.306	0.177	3.68245e-290	Neu 1
ssh2a	2.91037e-294	0.451853	0.295	0.169	5.796e-290	Neu 1
tmx1	2.75361e-293	0.430963	0.448	0.317	5.48381e-289	Neu 1
notch2	9.69825e-291	0.435135	0.532	0.402	1.93141e-286	Neu 1
ncaldb	8.24997e-290	0.344204	0.296	0.163	1.64298e-285	Neu 1
wu:fj29h11	2.16967e-279	0.438037	0.286	0.158	4.32089e-275	Neu 1
si:ch211-233a24.2	7.82492e-279	0.442489	0.317	0.192	1.55833e-274	Neu 1
sh3bp1	3.91695e-275	0.453873	0.271	0.154	7.8006e-271	Neu 1
chd7	6.23021e-275	0.416965	0.297	0.175	1.24075e-270	Neu 1
eif4ebp2	6.4344e-275	0.355054	0.545	0.429	1.28141e-270	Neu 1
slc66a1	7.89883e-275	0.565771	0.37	0.238	1.57305e-270	Neu 1
ggact.2	3.28445e-274	0.381346	0.25	0.135	6.54099e-270	Neu 1
capns1a	2.61064e-273	0.390528	0.496	0.379	5.19909e-269	Neu 1
txnrd3	1.90507e-269	0.368288	0.443	0.309	3.79396e-265	Neu 1
btbd10b	4.45356e-269	0.416896	0.396	0.272	8.86927e-265	Neu 1
si:ch211-201h21.5	7.81865e-267	0.34145	0.289	0.164	1.55708e-262	Neu 1
cebpa	8.26199e-267	0.593307	0.508	0.363	1.64538e-262	Neu 1
mlx	9.20648e-265	0.451524	0.428	0.299	1.83347e-260	Neu 1
agtrap	3.22867e-264	0.394219	0.334	0.208	6.4299e-260	Neu 1
amd1	4.10461e-264	0.382524	0.283	0.164	8.17434e-260	Neu 1
si:dkeyp-68b7.12	6.39095e-261	0.379766	0.544	0.424	1.27276e-256	Neu 1
junba	5.97782e-258	0.336247	0.825	0.69	1.19048e-253	Neu 1
si:dkeyp-27c8.2	6.8206e-258	0.413381	0.537	0.406	1.35832e-253	Neu 1
CU019662.1	7.57182e-257	0.40559	0.397	0.264	1.50793e-252	Neu 1
gig2i	4.32598e-254	0.336228	0.301	0.176	8.6152e-250	Neu 1
ralba	1.57286e-252	0.384125	0.354	0.235	3.13236e-248	Neu 1
hmgn7	2.8368e-252	0.292216	0.647	0.523	5.64949e-248	Neu 1
sptssa	4.0581e-251	0.384678	0.487	0.368	8.0817e-247	Neu 1
adgrg3	4.62629e-251	0.43404	0.496	0.363	9.21326e-247	Neu 1
tnfaip8l2b	1.27488e-250	0.379072	0.282	0.166	2.53893e-246	Neu 1
lgals9l3	2.68912e-249	0.406467	0.46	0.331	5.35538e-245	Neu 1
bcl10	6.53908e-249	0.43482	0.33	0.211	1.30226e-244	Neu 1
si:ch211-200p22.4	8.70783e-249	0.367318	0.272	0.16	1.73416e-244	Neu 1
ncor1	8.78515e-248	0.364078	0.31	0.192	1.74956e-243	Neu 1
tmem131l	3.34203e-247	0.404106	0.419	0.294	6.65566e-243	Neu 1
btk	6.29734e-247	0.324931	0.345	0.218	1.25411e-242	Neu 1
elf1	2.17036e-246	0.360404	0.514	0.399	4.32227e-242	Neu 1
slc38a2	6.00007e-244	0.369876	0.348	0.221	1.19491e-239	Neu 1
bida	3.74697e-243	0.297629	0.374	0.242	7.46209e-239	Neu 1
cmpk	4.01666e-241	0.34802	0.423	0.303	7.99919e-237	Neu 1
arrb2b	1.14644e-240	0.361529	0.487	0.371	2.28314e-236	Neu 1
ywhae1	2.68057e-240	0.296509	0.585	0.47	5.33836e-236	Neu 1
acadl	4.268e-240	0.375248	0.388	0.275	8.49972e-236	Neu 1
gnmt	3.16285e-239	0.349807	0.25	0.143	6.29882e-235	Neu 1
glod5	3.83875e-239	0.372793	0.413	0.296	7.64486e-235	Neu 1
arpc5a	6.46181e-239	0.36004	0.488	0.365	1.28687e-234	Neu 1
ndel1b	3.84441e-238	0.477479	0.309	0.198	7.65615e-234	Neu 1
tmem131	2.58124e-237	0.37497	0.53	0.409	5.14054e-233	Neu 1
h1-10	3.27967e-235	0.605686	0.41	0.271	6.53147e-231	Neu 1
sh3glb1b	3.35916e-235	0.369592	0.373	0.259	6.68977e-231	Neu 1
tspo	7.20715e-229	0.293934	0.328	0.212	1.4353e-224	Neu 1
copz1	5.88209e-227	0.314816	0.481	0.364	1.17142e-222	Neu 1
qkia	2.4397e-224	0.345697	0.407	0.291	4.85866e-220	Neu 1
ptprc	1.45184e-222	0.266782	0.825	0.683	2.89134e-218	Neu 1
arf6a	1.94874e-222	0.335948	0.513	0.404	3.88091e-218	Neu 1
igf2bp2b	4.31471e-222	0.296904	0.255	0.149	8.59274e-218	Neu 1
gtf2f2a	3.57781e-221	0.311165	0.284	0.173	7.1252e-217	Neu 1
mid1ip1b	4.95627e-221	0.370052	0.488	0.353	9.87041e-217	Neu 1
plscr3b	1.96033e-220	0.367286	0.415	0.293	3.904e-216	Neu 1
si:ch211-102c2.4	4.41364e-219	0.304125	0.388	0.269	8.78976e-215	Neu 1
glipr2	5.2529e-219	0.363351	0.332	0.218	1.04612e-214	Neu 1
adam28	1.15677e-218	0.444376	0.273	0.166	2.30372e-214	Neu 1
psmb8a	1.16183e-218	0.270955	0.637	0.526	2.31378e-214	Neu 1
erbin	6.08675e-216	0.375049	0.308	0.199	1.21218e-211	Neu 1
rab1ba	1.54519e-215	0.373911	0.458	0.353	3.07725e-211	Neu 1
pik3cg	1.20241e-213	0.334667	0.374	0.258	2.3946e-209	Neu 1
fmnl1a	5.23444e-213	0.318066	0.587	0.463	1.04244e-208	Neu 1
dbnlb	1.09801e-212	0.360475	0.448	0.338	2.18669e-208	Neu 1
serpinb1l1	2.16082e-210	0.364029	0.493	0.391	4.30327e-206	Neu 1
ppiaa	3.71612e-210	0.289431	0.936	0.852	7.40065e-206	Neu 1
hnrnpaba	3.87129e-209	0.274361	0.746	0.619	7.70968e-205	Neu 1
vps4b	7.48758e-209	0.307557	0.567	0.457	1.49115e-204	Neu 1
mtpn	1.06834e-207	0.319927	0.499	0.398	2.1276e-203	Neu 1
plekho1b	4.90433e-207	0.368976	0.661	0.532	9.76698e-203	Neu 1
smc6	1.43611e-206	0.338581	0.266	0.161	2.86002e-202	Neu 1
mrpl33	3.69619e-204	0.281841	0.492	0.372	7.36096e-200	Neu 1
akap13	7.88188e-204	0.326593	0.603	0.495	1.56968e-199	Neu 1
rxrga	1.82265e-203	0.362953	0.403	0.275	3.62982e-199	Neu 1
anxa11b	2.20012e-203	0.273976	0.628	0.533	4.38154e-199	Neu 1
trim8a	2.44268e-202	0.378903	0.254	0.156	4.86459e-198	Neu 1
otud5a	1.82292e-201	0.356656	0.326	0.221	3.63034e-197	Neu 1
kdm7aa	5.53239e-201	0.402729	0.484	0.374	1.10178e-196	Neu 1
gnai2b	5.93373e-200	0.354235	0.353	0.24	1.1817e-195	Neu 1
b3gnt3.4	6.34711e-200	0.336456	0.26	0.154	1.26403e-195	Neu 1
rn7sk	7.9482e-199	0.267609	0.531	0.403	1.58288e-194	Neu 1
caprin1b	1.44758e-196	0.327189	0.507	0.406	2.88286e-192	Neu 1
psme2	2.06796e-195	0.288655	0.591	0.488	4.11833e-191	Neu 1
ddx3xa	3.93861e-195	0.389223	0.48	0.38	7.84373e-191	Neu 1
zmat2	5.98612e-193	0.306498	0.419	0.322	1.19214e-188	Neu 1
mrpl47	1.13892e-192	0.296827	0.263	0.165	2.26817e-188	Neu 1
selplg	4.81322e-192	0.406349	0.315	0.212	9.58553e-188	Neu 1
h3f3c	8.83417e-192	0.293997	0.476	0.376	1.75932e-187	Neu 1
parp12a	1.6813e-190	0.323304	0.261	0.162	3.34832e-186	Neu 1
FAM83G	9.41408e-190	0.410834	0.301	0.202	1.87481e-185	Neu 1
foxo1a	4.03611e-186	0.500224	0.384	0.277	8.03792e-182	Neu 1
ifi35	9.07979e-186	0.32283	0.317	0.212	1.80824e-181	Neu 1
ilk	1.02808e-185	0.259991	0.399	0.295	2.04742e-181	Neu 1
lbr	1.97778e-184	0.299585	0.324	0.213	3.93875e-180	Neu 1
ube2l3b	5.26716e-184	0.27499	0.568	0.463	1.04895e-179	Neu 1
tes	1.50528e-183	0.260093	0.305	0.2	2.99776e-179	Neu 1
fut7	4.54358e-183	0.365491	0.338	0.23	9.04854e-179	Neu 1
pik3cb	1.5848e-180	0.325448	0.347	0.248	3.15613e-176	Neu 1
serpinb1l3	5.454e-180	0.354916	0.455	0.365	1.08616e-175	Neu 1
pdcd10b	3.37654e-178	0.29306	0.37	0.274	6.72437e-174	Neu 1
grasp	2.49067e-177	0.338315	0.504	0.402	4.96016e-173	Neu 1
gmds	4.29603e-176	0.314563	0.284	0.187	8.55555e-172	Neu 1
myo1g	2.51257e-174	0.316555	0.296	0.197	5.00378e-170	Neu 1
chd2	2.63962e-173	0.390213	0.353	0.254	5.2568e-169	Neu 1
cdipt	1.15619e-172	0.315195	0.314	0.218	2.30255e-168	Neu 1
rabgap1l	7.11824e-172	0.258925	0.265	0.168	1.4176e-167	Neu 1
gpr183a	9.00901e-172	0.364317	0.4	0.295	1.79414e-167	Neu 1
si:ch211-15b10.6	1.34746e-169	0.347641	0.383	0.281	2.68348e-165	Neu 1
ptpn2b	9.62967e-168	0.319807	0.291	0.199	1.91775e-163	Neu 1
ubc	7.32417e-165	0.259649	0.611	0.521	1.45861e-160	Neu 1
tppp	2.09836e-162	0.388743	0.403	0.276	4.17889e-158	Neu 1
nfil3-6	5.72336e-162	0.381522	0.271	0.179	1.13981e-157	Neu 1
CT027744.2	5.27224e-161	0.303887	0.434	0.338	1.04997e-156	Neu 1
nck1b	7.3361e-161	0.285448	0.524	0.418	1.46098e-156	Neu 1
stxbp2	2.46619e-159	0.294453	0.389	0.299	4.91141e-155	Neu 1
fosl2	1.40182e-158	0.250728	0.706	0.577	2.79173e-154	Neu 1
MYO9B	2.21736e-158	0.343116	0.338	0.247	4.41587e-154	Neu 1
march5l	2.38878e-158	0.284441	0.367	0.277	4.75725e-154	Neu 1
ankrd11	7.06129e-158	0.343446	0.491	0.403	1.40626e-153	Neu 1
irf7	1.89605e-156	0.287288	0.304	0.2	3.77599e-152	Neu 1
ppp1cab	2.01328e-155	0.295141	0.274	0.186	4.00944e-151	Neu 1
hnrnpa0a	2.36117e-154	0.27967	0.406	0.308	4.70228e-150	Neu 1
mvp	1.93506e-152	0.30839	0.447	0.359	3.85367e-148	Neu 1
ier2a	7.25737e-151	0.253152	0.628	0.516	1.44531e-146	Neu 1
zbtb16a	2.29688e-149	0.315347	0.29	0.198	4.57424e-145	Neu 1
letm1	5.06249e-148	0.284429	0.274	0.188	1.00819e-143	Neu 1
dock11	1.24875e-147	0.307269	0.36	0.27	2.48688e-143	Neu 1
ENSDARG00000101034	1.88922e-147	0.285605	0.468	0.363	3.76239e-143	Neu 1
clint1a	2.61353e-145	0.310614	0.427	0.342	5.20485e-141	Neu 1
ENSDARG00000035679	3.15587e-145	0.2689	0.359	0.267	6.28491e-141	Neu 1
tax1bp1b	1.26047e-143	0.305849	0.496	0.41	2.51022e-139	Neu 1
csnk1da	7.28232e-141	0.316674	0.366	0.28	1.45027e-136	Neu 1
kmt2ca	1.32883e-139	0.309012	0.347	0.261	2.64636e-135	Neu 1
si:cabz01101003.1	2.14444e-138	0.260109	0.266	0.18	4.27066e-134	Neu 1
si:ch211-226m16.2	1.11816e-137	0.356757	0.297	0.207	2.22682e-133	Neu 1
rab5ab	1.90636e-136	0.283961	0.434	0.356	3.79652e-132	Neu 1
ifngr2	2.44858e-136	0.329426	0.373	0.294	4.87635e-132	Neu 1
zgc:56525	6.80279e-135	0.29466	0.324	0.243	1.35478e-130	Neu 1
ncf4	1.08426e-134	0.273367	0.308	0.221	2.1593e-130	Neu 1
stk10	4.00792e-133	0.313504	0.287	0.205	7.98178e-129	Neu 1
si:dkey-286j15.3	6.7871e-133	0.259907	0.258	0.177	1.35165e-128	Neu 1
mob3a	3.07875e-132	0.267901	0.326	0.243	6.13133e-128	Neu 1
pcyt2	1.21169e-129	0.316681	0.32	0.239	2.41308e-125	Neu 1
dock8	1.31141e-129	0.286066	0.358	0.276	2.61166e-125	Neu 1
CABZ01056054.1	3.10484e-129	0.334243	0.353	0.269	6.18329e-125	Neu 1
ppp1r12a	4.36092e-124	0.25833	0.415	0.335	8.68476e-120	Neu 1
nucb1	3.6851e-122	0.287847	0.388	0.311	7.33887e-118	Neu 1
hnrnpd	3.90608e-122	0.286541	0.348	0.272	7.77896e-118	Neu 1
wasf2	9.27756e-120	0.257252	0.472	0.395	1.84763e-115	Neu 1
cers2b	1.09012e-119	0.291033	0.33	0.252	2.17097e-115	Neu 1
sec61a1l	2.52788e-119	0.26953	0.26	0.181	5.03427e-115	Neu 1
MARK4	3.58574e-119	0.321199	0.303	0.227	7.141e-115	Neu 1
sft2d1	6.82055e-119	0.288703	0.271	0.196	1.35831e-114	Neu 1
ifrd1	1.38486e-117	0.295442	0.421	0.345	2.75795e-113	Neu 1
si:dkey-192g7.3	2.95833e-117	0.315467	0.436	0.347	5.89152e-113	Neu 1
eif4g2a	2.09769e-112	0.298259	0.343	0.271	4.17755e-108	Neu 1
sept7b	2.5661e-112	0.251721	0.381	0.308	5.11039e-108	Neu 1
psmb13a	2.3175e-111	0.256567	0.405	0.334	4.6153e-107	Neu 1
ndfip2	8.90238e-111	0.264077	0.396	0.324	1.77291e-106	Neu 1
dusp5	1.88306e-110	0.284868	0.533	0.452	3.75012e-106	Neu 1
rras	5.81121e-110	0.259859	0.263	0.192	1.1573e-105	Neu 1
CABZ01109481.1	1.02638e-109	0.272216	0.261	0.188	2.04404e-105	Neu 1
crfb4	1.88836e-108	0.293221	0.305	0.232	3.76067e-104	Neu 1
epn1	3.31333e-108	0.343633	0.313	0.24	6.5985e-104	Neu 1
lrp10	1.05406e-106	0.29415	0.341	0.273	2.09917e-102	Neu 1
ptbp3	3.59249e-106	0.254334	0.302	0.229	7.15445e-102	Neu 1
epn2	2.23767e-104	0.297951	0.294	0.224	4.45631e-100	Neu 1
si:ch73-269m14.2	2.07361e-103	0.263599	0.289	0.218	4.12959e-99	Neu 1
nfkbiab	5.59072e-103	0.281147	0.823	0.742	1.11339e-98	Neu 1
ephx2	2.65033e-102	0.308089	0.392	0.318	5.27813e-98	Neu 1
jmjd1cb	1.63859e-100	0.268149	0.327	0.254	3.26326e-96	Neu 1
eif4g2b	2.63509e-100	0.259858	0.52	0.457	5.24778e-96	Neu 1
si:dkey-21a6.5	4.68662e-100	0.294564	0.269	0.201	9.3334e-96	Neu 1
ggh	2.3515e-99	0.257405	0.26	0.192	4.68301e-95	Neu 1
wnk1b	1.31628e-97	0.304529	0.271	0.203	2.62137e-93	Neu 1
sec63	9.26521e-97	0.302427	0.294	0.229	1.84517e-92	Neu 1
aip	1.05753e-96	0.253509	0.272	0.205	2.10606e-92	Neu 1
nucb2a	1.23338e-95	0.254939	0.361	0.296	2.45627e-91	Neu 1
osbpl9	3.82775e-91	0.258669	0.267	0.202	7.62296e-87	Neu 1
fam210b	5.29845e-90	0.311891	0.262	0.193	1.05519e-85	Neu 1
zgc:162698	2.41663e-89	0.267777	0.342	0.28	4.81272e-85	Neu 1
rps6ka3a	1.77052e-85	0.254814	0.253	0.192	3.52599e-81	Neu 1
lonrf1l	6.47405e-85	0.324373	0.276	0.213	1.28931e-80	Neu 1
BX649485.1	8.44511e-81	0.382451	0.296	0.229	1.68184e-76	Neu 1
fam177a1	2.94527e-80	0.253051	0.289	0.231	5.86552e-76	Neu 1
rbbp6	1.03185e-75	0.26762	0.401	0.347	2.05494e-71	Neu 1
grapa	7.98295e-59	0.316805	0.344	0.297	1.5898e-54	Neu 1
ptgis	1.71376e-34	0.25923	0.307	0.27	3.41295e-30	Neu 1
zgc:152791	0.000791875	0.436613	0.342	0.356	1	Neu 1
CU571382.1	0	4.62105	0.985	0.085	0	B cell
zgc:194275	0	4.1691	0.983	0.058	0	B cell
igic1s1	0	3.92832	0.952	0.053	0	B cell
cxcr4a	0	3.0586	0.78	0.055	0	B cell
CU896602.1	0	2.88087	0.65	0.025	0	B cell
zgc:153659.1	0	2.63274	0.6	0.019	0	B cell
igl3v5	0	2.54732	0.709	0.023	0	B cell
CR318588.1	0	2.46363	0.692	0.64	0	B cell
ighv1-4.1	0	2.38152	0.524	0.031	0	B cell
BX571825.5	0	2.34318	0.65	0.018	0	B cell
dap1b.1	0	2.24693	0.624	0.128	0	B cell
si:dkey-24p1.1	0	2.17128	0.695	0.03	0	B cell
ccr9a	0	2.10745	0.853	0.474	0	B cell
CT573231.1	0	2.04637	0.517	0.035	0	B cell
dusp2	0	2.01191	0.756	0.404	0	B cell
sftpba	0	1.9581	0.624	0.046	0	B cell
bhlhe40	0	1.9391	0.883	0.532	0	B cell
si:ch211-119e14.1	0	1.93529	0.692	0.144	0	B cell
dap1b	0	1.92822	0.278	0.083	0	B cell
CT573342.2	0	1.87338	0.621	0.106	0	B cell
mych	0	1.82491	0.56	0.073	0	B cell
cxcr4b	0	1.71744	0.991	0.741	0	B cell
rgs13	0	1.70523	0.904	0.557	0	B cell
si:ch211-195b13.1	0	1.68742	0.534	0.195	0	B cell
rsl24d1	0	1.68607	0.98	0.757	0	B cell
igl1c3	0	1.5992	0.28	0.009	0	B cell
rps26l	0	1.5239	0.996	0.915	0	B cell
cd83	0	1.50931	0.654	0.36	0	B cell
rps17	0	1.50067	0.995	0.887	0	B cell
cd37	0	1.49235	0.484	0.013	0	B cell
BX571825.3	0	1.46907	0.35	0.009	0	B cell
rpl22l1	0	1.45041	0.93	0.647	0	B cell
si:dkey-151g10.6	0	1.42022	0.999	0.974	0	B cell
swap70a	0	1.4002	0.447	0.021	0	B cell
rpl32	0	1.39942	0.998	0.936	0	B cell
rps12	0	1.38088	0.996	0.936	0	B cell
rpl23	0	1.37812	0.998	0.952	0	B cell
si:ch211-145b13.6	0	1.37327	0.424	0.026	0	B cell
rps14	0	1.37155	0.997	0.95	0	B cell
cited4a	0	1.37072	0.682	0.319	0	B cell
rpl35	0	1.36422	0.996	0.934	0	B cell
rpl5b	0	1.36216	0.948	0.727	0	B cell
rpl7	0	1.33896	0.997	0.936	0	B cell
rpl18a	0	1.32705	0.996	0.938	0	B cell
rps27.1	0	1.32693	0.996	0.928	0	B cell
rpl37.1	0	1.30804	0.996	0.933	0	B cell
ifi46	0	1.30306	0.538	0.255	0	B cell
rplp2l	0	1.29939	0.996	0.932	0	B cell
rps20	0	1.29606	0.716	0.684	0	B cell
blnk	0	1.28106	0.688	0.372	0	B cell
rpl36a	0	1.27742	0.997	0.935	0	B cell
gtpbp4	0	1.275	0.761	0.438	0	B cell
rplp1	0	1.27336	0.997	0.939	0	B cell
rpl13a	0	1.26882	0.997	0.931	0	B cell
eef1g	0	1.26743	0.993	0.872	0	B cell
rpl27	0	1.26645	0.996	0.926	0	B cell
eef1da	0	1.26599	0.918	0.635	0	B cell
irf8	0	1.26194	0.38	0.191	0	B cell
rpl34	0	1.26096	0.994	0.896	0	B cell
rpl11	0	1.2521	0.997	0.944	0	B cell
rsl1d1	0	1.24413	0.625	0.3	0	B cell
rps28	0	1.24357	0.995	0.908	0	B cell
si:ch1073-220m6.1	0	1.23987	0.377	0.012	0	B cell
si:ch211-150o23.2	0	1.23954	0.446	0.1	0	B cell
rpl15	0	1.23803	0.992	0.91	0	B cell
rps13	0	1.23727	0.996	0.923	0	B cell
atp11a	0	1.23469	0.414	0.043	0	B cell
RPL37A	0	1.23397	0.996	0.926	0	B cell
rps2	0	1.22623	0.998	0.962	0	B cell
rps3a	0	1.22605	0.997	0.941	0	B cell
nop53	0	1.22532	0.784	0.48	0	B cell
rps7	0	1.22414	0.997	0.944	0	B cell
rps8a	0	1.22231	0.996	0.942	0	B cell
rpl7a	0	1.219	0.997	0.941	0	B cell
rpl13	0	1.21478	0.997	0.951	0	B cell
rpl10a	0	1.21445	0.996	0.939	0	B cell
rpl6	0	1.20994	0.968	0.82	0	B cell
rpl28	0	1.20965	0.994	0.891	0	B cell
rpl31	0	1.20419	0.993	0.893	0	B cell
id31	0	1.19892	0.589	0.321	0	B cell
rps3	0	1.1975	0.992	0.888	0	B cell
rpl17	0	1.1955	0.997	0.944	0	B cell
rpl19	0	1.19424	0.997	0.952	0	B cell
rpl8	0	1.19375	0.997	0.947	0	B cell
rps23	0	1.18784	0.998	0.946	0	B cell
rpl9	0	1.18768	0.996	0.934	0	B cell
rps26	0	1.1819	0.989	0.842	0	B cell
rpl36	0	1.17964	0.995	0.908	0	B cell
naca	0	1.17838	0.993	0.899	0	B cell
rps5	0	1.17801	0.998	0.946	0	B cell
rpl24	0	1.17654	0.995	0.912	0	B cell
rps4x	0	1.17495	0.995	0.926	0	B cell
si:ch211-114l13.12	0	1.17299	0.374	0.033	0	B cell
pik3r1	0	1.17075	0.473	0.227	0	B cell
rpl21	0	1.16631	0.997	0.944	0	B cell
rps18	0	1.16548	0.951	0.828	0	B cell
bcl2l10	0	1.16381	0.611	0.371	0	B cell
serbp1a	0	1.15935	0.98	0.802	0	B cell
rps6	0	1.15884	0.985	0.883	0	B cell
rps16	0	1.15765	0.993	0.898	0	B cell
rps9	0	1.15073	0.997	0.943	0	B cell
faua	0	1.14973	0.991	0.887	0	B cell
uba52	0	1.14851	0.991	0.864	0	B cell
rps11	0	1.14694	0.994	0.914	0	B cell
rps24	0	1.14603	0.997	0.944	0	B cell
rpl30	0	1.13343	0.993	0.901	0	B cell
rpl35a	0	1.12716	0.997	0.934	0	B cell
rpl3	0	1.12447	0.978	0.877	0	B cell
rpl18	0	1.1149	0.995	0.932	0	B cell
rpl39	0	1.1142	0.997	0.937	0	B cell
pou2f2a	0	1.10745	0.335	0.016	0	B cell
rack1	0	1.10106	0.995	0.918	0	B cell
rpl12	0	1.1001	0.996	0.939	0	B cell
rps10	0	1.09863	0.997	0.948	0	B cell
rps15a	0	1.09684	0.997	0.944	0	B cell
eef1b2	0	1.08562	0.983	0.86	0	B cell
ralgps2	0	1.08273	0.366	0.058	0	B cell
rps29	0	1.08027	0.997	0.944	0	B cell
rps15	0	1.07882	0.995	0.934	0	B cell
cobll1a	0	1.07683	0.302	0.008	0	B cell
rpl26	0	1.0693	0.573	0.376	0	B cell
rpl10	0	1.0567	0.996	0.955	0	B cell
atp10d	0	1.05535	0.364	0.165	0	B cell
mycb	0	1.05098	0.392	0.106	0	B cell
tspan2a	0	1.03144	0.339	0.025	0	B cell
rps25	0	1.02749	0.997	0.939	0	B cell
CT027980.1	0	1.02109	0.313	0.013	0	B cell
rpl14	0	1.01832	0.995	0.919	0	B cell
rpsa	0	1.01332	0.998	0.947	0	B cell
rpl38	0	0.994335	0.994	0.903	0	B cell
epb41a	0	0.991411	0.299	0.01	0	B cell
rpl23a	0	0.990249	0.986	0.881	0	B cell
kctd5a	0	0.985508	0.828	0.585	0	B cell
pax5	0	0.977947	0.297	0.007	0	B cell
rps21	0	0.966272	0.994	0.917	0	B cell
rbm38	0	0.952919	0.334	0.052	0	B cell
bpifcl	0	0.949028	0.355	0.07	0	B cell
prkcbb	0	0.944772	0.336	0.067	0	B cell
ddx21	0	0.934572	0.61	0.367	0	B cell
ramp2	0	0.920421	0.352	0.079	0	B cell
irf4b	0	0.918677	0.268	0.009	0	B cell
rps27a	0	0.915554	0.997	0.954	0	B cell
dapp1	0	0.914594	0.312	0.05	0	B cell
rplp0	0	0.911632	0.998	0.959	0	B cell
rpl4	0	0.910789	0.937	0.793	0	B cell
thrap3a	0	0.901374	0.262	0.008	0	B cell
BX649442.1	0	0.893762	0.299	0.038	0	B cell
btf3	0	0.87783	0.968	0.814	0	B cell
rps19	0	0.870195	0.998	0.95	0	B cell
cd79b	0	0.869303	0.257	0.006	0	B cell
tsc22d3	0	0.862607	0.616	0.434	0	B cell
eif3ea	0	0.861658	0.843	0.635	0	B cell
syk	0	0.851605	0.533	0.36	0	B cell
nsa2	0	0.851296	0.851	0.652	0	B cell
si:dkey-23i12.5	0	0.847741	0.313	0.099	0	B cell
rpl22	0	0.834692	0.995	0.917	0	B cell
lmo2	0	0.823937	0.257	0.05	0	B cell
herpud1	0	0.803555	0.476	0.282	0	B cell
btg2	0	0.803288	0.885	0.597	0	B cell
rpl5a	0	0.796583	0.983	0.856	0	B cell
sesn1	0	0.795877	0.26	0.087	0	B cell
rpl29	0	0.792792	0.954	0.784	0	B cell
mibp2	0	0.75911	0.886	0.708	0	B cell
grap2b	0	0.757341	0.448	0.289	0	B cell
pde4ba1	0	0.749102	0.72	0.496	0	B cell
pno1	0	0.725628	0.55	0.382	0	B cell
si:ch211-214p16.1	0	0.713057	0.265	0.098	0	B cell
card11	0	0.707216	0.291	0.118	0	B cell
ccni1	0	0.692785	0.893	0.766	0	B cell
ponzr61	0	0.689407	0.437	0.22	0	B cell
ube2e3	0	0.686808	0.523	0.37	0	B cell
ncl	0	0.685268	0.696	0.57	0	B cell
nop56	0	0.68144	0.435	0.296	0	B cell
klf2a	0	0.677536	0.325	0.183	0	B cell
tagapa	0	0.670098	0.55	0.402	0	B cell
gadd45ga	0	0.669193	0.309	0.137	0	B cell
eif3f	0	0.664631	0.945	0.787	0	B cell
klf13	0	0.660941	0.419	0.265	0	B cell
eif3m	0	0.651857	0.89	0.705	0	B cell
ppdpfb	0	0.6455	0.714	0.523	0	B cell
tcf12	0	0.626374	0.255	0.101	0	B cell
ier5	0	0.618053	0.636	0.5	0	B cell
rplp2	0	0.58274	0.995	0.934	0	B cell
eef2b	0	0.582626	0.973	0.84	0	B cell
eif5a	0	0.579184	0.664	0.547	0	B cell
rps27.2	0	0.576084	0.933	0.756	0	B cell
ponzr1	0	0.563648	0.681	0.529	0	B cell
gng2	0	0.557904	0.257	0.108	0	B cell
cd74b	0	0.546462	0.978	0.553	0	B cell
hnrnpa0l.11	0	0.540315	0.947	0.815	0	B cell
mhc2a	0	0.514503	0.591	0.295	0	B cell
eif3g	0	0.513633	0.678	0.579	0	B cell
eif3ha	0	0.49859	0.625	0.524	0	B cell
cd74a	0	0.480944	0.986	0.513	0	B cell
eef1a1l1	0	0.479799	0.998	0.967	0	B cell
tubb2b	0	0.478517	0.652	0.504	0	B cell
cirbpb	0	0.461049	0.932	0.811	0	B cell
ptmaa	0	0.421105	0.911	0.746	0	B cell
hsp90ab1	0	0.415394	0.997	0.951	0	B cell
RPS17	0	0.32638	0.975	0.901	0	B cell
b2m	0	0.279691	0.979	0.885	0	B cell
slc25a5	0	0.264765	0.997	0.954	0	B cell
nop58	6.92405e-308	0.705505	0.32	0.192	1.37892e-303	B cell
rel	3.88433e-292	0.595105	0.419	0.295	7.73564e-288	B cell
mknk2b	2.48019e-272	0.494204	0.495	0.364	4.93931e-268	B cell
ola1	3.85657e-268	0.420494	0.643	0.556	7.68036e-264	B cell
ptmab	2.47217e-257	0.293651	0.926	0.799	4.92332e-253	B cell
pabpc1a	4.05288e-253	0.310211	0.887	0.778	8.07132e-249	B cell
nfkb2	4.64038e-232	0.54251	0.305	0.192	9.24132e-228	B cell
ppiaa1	1.24231e-209	0.329307	0.894	0.86	2.47405e-205	B cell
sat1a.21	2.52097e-205	0.300838	0.96	0.837	5.02051e-201	B cell
nfkbiab1	1.81443e-202	0.285394	0.894	0.733	3.61344e-198	B cell
brd2a	1.50774e-197	0.519573	0.538	0.461	3.00266e-193	B cell
stk17al1	3.49278e-184	0.308286	0.273	0.159	6.95586e-180	B cell
ahcy	6.80566e-179	0.407462	0.431	0.335	1.35535e-174	B cell
irf1b	8.46664e-172	0.388755	0.26	0.159	1.68613e-167	B cell
npm1a	3.57962e-171	0.653401	0.415	0.326	7.12882e-167	B cell
SERP1	4.65642e-170	0.318599	0.646	0.566	9.27326e-166	B cell
ddit3	6.27543e-163	0.393155	0.568	0.495	1.24975e-158	B cell
CU104709.1	1.91982e-162	0.428755	0.316	0.225	3.82333e-158	B cell
cct6a	4.34637e-160	0.357981	0.577	0.531	8.6558e-156	B cell
eif2s3	5.48977e-159	0.327711	0.61	0.563	1.09329e-154	B cell
calm3a.1	5.15778e-156	0.366135	0.345	0.254	1.02717e-151	B cell
brdt	8.18246e-150	0.473389	0.289	0.2	1.62954e-145	B cell
tob1a	1.7706e-148	0.397305	0.466	0.386	3.52614e-144	B cell
mthfd2	8.79657e-147	0.498396	0.251	0.171	1.75184e-142	B cell
gig2d	3.55752e-143	0.314411	0.415	0.31	7.0848e-139	B cell
tiparp	1.37374e-141	0.469169	0.269	0.189	2.73579e-137	B cell
fam53b	2.75198e-141	0.366483	0.452	0.386	5.48057e-137	B cell
pa2g4b	5.05002e-138	0.476133	0.342	0.272	1.00571e-133	B cell
rn7sk1	1.14335e-137	0.552926	0.484	0.412	2.27699e-133	B cell
dnajb1b	1.44454e-126	0.315371	0.274	0.184	2.87681e-122	B cell
irf71	6.22438e-126	0.363118	0.291	0.203	1.23959e-121	B cell
wasa1	1.65005e-119	0.393292	0.437	0.359	3.28608e-115	B cell
eif2s1b	3.48019e-115	0.302758	0.493	0.446	6.9308e-111	B cell
rsrp1	1.02447e-110	0.377941	0.471	0.403	2.04023e-106	B cell
susd11	6.73313e-106	0.265923	0.256	0.174	1.3409e-101	B cell
cct4	1.85985e-102	0.335159	0.536	0.501	3.7039e-98	B cell
ets21	4.4451e-102	0.332884	0.552	0.494	8.85241e-98	B cell
ucp2	2.18051e-99	0.261177	0.679	0.624	4.34249e-95	B cell
adh5	9.12422e-98	0.331871	0.332	0.266	1.81709e-93	B cell
grasp1	1.53089e-94	0.354664	0.461	0.409	3.04877e-90	B cell
plcg2	1.38648e-90	0.426491	0.358	0.315	2.76118e-86	B cell
pcf11	2.84509e-89	0.378042	0.365	0.314	5.666e-85	B cell
mef2cb	4.09925e-80	0.317453	0.337	0.282	8.16366e-76	B cell
arhgap15	1.41576e-76	0.370907	0.279	0.227	2.81948e-72	B cell
lamtor3	4.60536e-74	0.42891	0.343	0.311	9.17158e-70	B cell
si:ch211-217k17.7	7.47948e-74	0.375752	0.296	0.249	1.48954e-69	B cell
ranbp1	3.96265e-73	0.344703	0.385	0.353	7.89162e-69	B cell
zgc:153409	1.09414e-71	0.253695	0.425	0.383	2.17897e-67	B cell
si:dkey-171c9.3	6.29575e-70	0.341316	0.275	0.222	1.2538e-65	B cell
bida1	1.53114e-61	0.364798	0.3	0.255	3.04926e-57	B cell
eif3k	9.30305e-61	0.29646	0.442	0.423	1.8527e-56	B cell
n4bp1	3.74378e-57	0.334027	0.442	0.417	7.45573e-53	B cell
si:ch211-199g17.2	2.57433e-56	0.316597	0.337	0.302	5.12677e-52	B cell
setb	8.02666e-53	0.286537	0.446	0.436	1.59851e-48	B cell
eml3	7.36551e-52	0.317915	0.28	0.244	1.46684e-47	B cell
xiap	1.5797e-50	0.295394	0.264	0.222	3.14597e-46	B cell
stat2	4.39697e-47	0.307658	0.421	0.401	8.75656e-43	B cell
khdrbs1b	5.28842e-46	0.322409	0.255	0.222	1.05319e-41	B cell
jmjd1cb1	3.30423e-44	0.350387	0.29	0.26	6.58037e-40	B cell
tnrc6c1	2.58964e-43	0.327844	0.267	0.231	5.15727e-39	B cell
sf3b1	5.52786e-42	0.340463	0.36	0.35	1.10087e-37	B cell
dedd1	8.26292e-42	0.293489	0.309	0.28	1.64556e-37	B cell
hexim1	2.22605e-41	0.343342	0.304	0.28	4.43318e-37	B cell
tomm5	7.83616e-33	0.275062	0.337	0.331	1.56057e-28	B cell
ankrd12	5.09731e-23	0.290449	0.298	0.287	1.01513e-18	B cell
apoeb	0	3.72138	0.587	0.175	0	Mac 1
fabp11a	0	3.15716	0.724	0.346	0	Mac 1
ctsd	0	2.75002	0.995	0.66	0	Mac 1
ctsla	0	2.74428	0.926	0.397	0	Mac 1
ctsz	0	2.72151	0.959	0.439	0	Mac 1
cd9b	0	2.62837	0.763	0.207	0	Mac 1
vcanb	0	2.48057	0.76	0.182	0	Mac 1
lgmn	0	2.39868	0.955	0.45	0	Mac 1
NPC2	0	2.37021	0.717	0.276	0	Mac 1
slc43a3b	0	2.24849	0.831	0.254	0	Mac 1
si:ch211-198c19.3	0	2.2138	0.834	0.25	0	Mac 1
ctsba	0	2.20407	0.982	0.636	0	Mac 1
apoc1	0	2.15452	0.265	0.037	0	Mac 1
zgc:174904	0	2.15182	0.911	0.356	0	Mac 1
gpc1b	0	2.1186	0.733	0.09	0	Mac 1
psap	0	2.01301	0.984	0.614	0	Mac 1
npc2	0	1.96016	0.968	0.615	0	Mac 1
lipf	0	1.94903	0.912	0.33	0	Mac 1
havcr1	0	1.88766	0.927	0.316	0	Mac 1
gda	0	1.88535	0.48	0.047	0	Mac 1
cndp2	0	1.86955	0.896	0.343	0	Mac 1
ifi30	0	1.82113	0.914	0.543	0	Mac 1
anxa2a	0	1.80183	0.817	0.332	0	Mac 1
slc43a2b	0	1.76869	0.794	0.19	0	Mac 1
grna	0	1.63677	0.954	0.452	0	Mac 1
ctsk	0	1.61405	0.804	0.28	0	Mac 1
ctsc	0	1.59024	0.917	0.442	0	Mac 1
id1	0	1.58741	0.707	0.259	0	Mac 1
vat1	0	1.57794	0.723	0.314	0	Mac 1
slc35f6	0	1.57446	0.792	0.236	0	Mac 1
selenop	0	1.53785	0.798	0.291	0	Mac 1
pdk2b	0	1.53676	0.594	0.154	0	Mac 1
grn1	0	1.5177	0.99	0.752	0	Mac 1
asah1b	0	1.48233	0.925	0.414	0	Mac 1
krt18b	0	1.47414	0.973	0.629	0	Mac 1
slc7a7	0	1.45408	0.888	0.307	0	Mac 1
atp6v0ca	0	1.45322	0.969	0.648	0	Mac 1
stoml3b	0	1.45176	0.818	0.285	0	Mac 1
bcam	0	1.4204	0.59	0.146	0	Mac 1
dpp7	0	1.4112	0.915	0.365	0	Mac 1
lrpap1	0	1.40411	0.642	0.143	0	Mac 1
ahnak	0	1.40394	0.914	0.395	0	Mac 1
si:ch211-212k18.7	0	1.39485	0.969	0.666	0	Mac 1
lrp1ab	0	1.38719	0.629	0.074	0	Mac 1
mafbb	0	1.37938	0.682	0.208	0	Mac 1
tspan36	0	1.37214	0.962	0.518	0	Mac 1
ctsh	0	1.35118	0.896	0.383	0	Mac 1
plin2	0	1.34787	0.67	0.298	0	Mac 1
slc3a2a	0	1.34053	0.867	0.268	0	Mac 1
CR293509.1	0	1.33908	0.462	0.079	0	Mac 1
sgpl1	0	1.33722	0.757	0.201	0	Mac 1
ywhaqa	0	1.31544	0.821	0.452	0	Mac 1
mpp1	0	1.30217	0.824	0.311	0	Mac 1
pmp22b	0	1.29754	0.745	0.26	0	Mac 1
id2b	0	1.28945	0.466	0.104	0	Mac 1
krt8	0	1.2612	0.955	0.562	0	Mac 1
atp6v1e1b	0	1.24807	0.922	0.516	0	Mac 1
anxa5b	0	1.23639	0.778	0.282	0	Mac 1
atp6v1g1	0	1.19394	0.942	0.668	0	Mac 1
pcbd1	0	1.17164	0.389	0.05	0	Mac 1
rnaseka	0	1.15353	0.929	0.582	0	Mac 1
cd631	0	1.14755	0.989	0.822	0	Mac 1
zgc:152830	0	1.1351	0.802	0.299	0	Mac 1
abca1a	0	1.13067	0.725	0.247	0	Mac 1
cmklr1	0	1.12834	0.864	0.353	0	Mac 1
pepd	0	1.12062	0.832	0.315	0	Mac 1
pleca	0	1.10356	0.496	0.172	0	Mac 1
fn1a	0	1.1015	0.446	0.107	0	Mac 1
tcirg1b	0	1.09967	0.876	0.404	0	Mac 1
si:cabz01074946.1	0	1.09872	0.893	0.377	0	Mac 1
abca1b	0	1.09679	0.779	0.262	0	Mac 1
si:dkey-5n18.1	0	1.0888	0.847	0.368	0	Mac 1
mmp14b	0	1.08589	0.632	0.182	0	Mac 1
fxyd1	0	1.08442	0.753	0.219	0	Mac 1
abhd12	0	1.07182	0.598	0.139	0	Mac 1
ctss2.1	0	1.06552	0.948	0.737	0	Mac 1
atp6v1h	0	1.06464	0.843	0.367	0	Mac 1
snx9b	0	1.05768	0.734	0.236	0	Mac 1
mafba	0	1.056	0.782	0.276	0	Mac 1
fuca2	0	1.05361	0.853	0.335	0	Mac 1
igf2b	0	1.0508	0.661	0.162	0	Mac 1
hsd17b14	0	1.03668	0.559	0.122	0	Mac 1
scpep1	0	1.02599	0.919	0.526	0	Mac 1
zgc:77486.1	0	1.02361	0.808	0.319	0	Mac 1
zgc:110239	0	1.0212	0.756	0.267	0	Mac 1
atp6v1d	0	1.01844	0.752	0.276	0	Mac 1
gsna	0	1.00855	0.694	0.205	0	Mac 1
pgrmc1	0	1.00783	0.592	0.168	0	Mac 1
snx11	0	1.00331	0.592	0.102	0	Mac 1
cd99	0	0.998866	0.729	0.236	0	Mac 1
tpp1	0	0.996673	0.668	0.179	0	Mac 1
gnpda1	0	0.979071	0.773	0.268	0	Mac 1
mob1bb	0	0.977521	0.566	0.092	0	Mac 1
slc40a1	0	0.975164	0.53	0.176	0	Mac 1
ctsa	0	0.966883	0.858	0.366	0	Mac 1
atp6v1ba	0	0.952461	0.8	0.352	0	Mac 1
marco	0	0.950768	0.887	0.378	0	Mac 1
MFAP4.1	0	0.949634	0.513	0.224	0	Mac 1
BX649485.2	0	0.946115	0.425	0.177	0	Mac 1
aplp2	0	0.945952	0.784	0.281	0	Mac 1
trpv1	0	0.943874	0.725	0.217	0	Mac 1
BX649485.4	0	0.942153	0.338	0.134	0	Mac 1
atp6v1ab	0	0.939549	0.685	0.218	0	Mac 1
pfn2	0	0.938405	0.804	0.404	0	Mac 1
bhlhe41	0	0.930338	0.439	0.065	0	Mac 1
c1qc	0	0.926377	0.942	0.417	0	Mac 1
atox1	0	0.925368	0.669	0.223	0	Mac 1
rnaset21	0	0.921653	0.75	0.37	0	Mac 1
rtn3	0	0.918578	0.515	0.12	0	Mac 1
sqstm1	0	0.915713	0.797	0.437	0	Mac 1
enpp1	0	0.914897	0.727	0.24	0	Mac 1
adipor2	0	0.90142	0.816	0.41	0	Mac 1
ctss2.2	0	0.898854	0.949	0.618	0	Mac 1
cpvl	0	0.897773	0.668	0.19	0	Mac 1
il21r.1	0	0.888662	0.648	0.168	0	Mac 1
tspan31	0	0.882964	0.652	0.221	0	Mac 1
fth1a	0	0.871291	0.966	0.877	0	Mac 1
tcima	0	0.850363	0.663	0.264	0	Mac 1
hexb	0	0.850234	0.77	0.345	0	Mac 1
sh3pxd2b	0	0.848317	0.604	0.125	0	Mac 1
robo4	0	0.843879	0.576	0.134	0	Mac 1
kctd12.2	0	0.841002	0.728	0.332	0	Mac 1
sdcbp2	0	0.839381	0.956	0.74	0	Mac 1
atp6v0d1	0	0.839153	0.776	0.35	0	Mac 1
ndfip1l	0	0.838169	0.632	0.189	0	Mac 1
naga	0	0.82469	0.81	0.423	0	Mac 1
kctd5a1	0	0.808982	0.858	0.583	0	Mac 1
cx32.2	0	0.805693	0.722	0.234	0	Mac 1
atp6v1c1b	0	0.804868	0.57	0.14	0	Mac 1
arl6ip1	0	0.802026	0.889	0.586	0	Mac 1
porb	0	0.801362	0.554	0.136	0	Mac 1
zeb2a	0	0.798067	0.711	0.285	0	Mac 1
npepl1	0	0.796382	0.739	0.314	0	Mac 1
klf6a	0	0.794505	0.905	0.661	0	Mac 1
atp6ap1b	0	0.793554	0.793	0.376	0	Mac 1
canx	0	0.790042	0.676	0.292	0	Mac 1
igf2r	0	0.789541	0.571	0.146	0	Mac 1
sdr16c5b	0	0.787702	0.597	0.221	0	Mac 1
rab1ab	0	0.784259	0.853	0.556	0	Mac 1
atp6v0b	0	0.783636	0.797	0.352	0	Mac 1
mical3b	0	0.780864	0.495	0.075	0	Mac 1
bri3	0	0.779825	0.757	0.331	0	Mac 1
s100a10b1	0	0.778977	0.951	0.732	0	Mac 1
atp6v0e1	0	0.77525	0.94	0.734	0	Mac 1
slc30a1a	0	0.77019	0.753	0.302	0	Mac 1
hdlbpa	0	0.763844	0.789	0.385	0	Mac 1
prdx6	0	0.761042	0.862	0.548	0	Mac 1
cst14a.2	0	0.758961	0.807	0.493	0	Mac 1
plecb	0	0.756749	0.713	0.378	0	Mac 1
npc1	0	0.750909	0.562	0.141	0	Mac 1
cebpa1	0	0.750366	0.727	0.336	0	Mac 1
c1qb	0	0.748999	0.933	0.446	0	Mac 1
gpx4b	0	0.747735	0.827	0.489	0	Mac 1
c1qa	0	0.747713	0.872	0.355	0	Mac 1
slc39a1	0	0.742501	0.526	0.117	0	Mac 1
rgs5b	0	0.737584	0.401	0.108	0	Mac 1
vmp1	0	0.735312	0.803	0.408	0	Mac 1
alcama	0	0.730098	0.268	0.034	0	Mac 1
atp1a1a.1	0	0.719583	0.852	0.477	0	Mac 1
arl4cb	0	0.719145	0.478	0.112	0	Mac 1
itgae.21	0	0.716612	0.855	0.464	0	Mac 1
clta	0	0.71495	0.647	0.268	0	Mac 1
epdl1	0	0.712621	0.292	0.065	0	Mac 1
psmb7	0	0.709393	0.656	0.28	0	Mac 1
pikfyve	0	0.701216	0.619	0.221	0	Mac 1
rab5c	0	0.700311	0.862	0.535	0	Mac 1
slc37a2	0	0.700231	0.491	0.115	0	Mac 1
chmp2bb	0	0.699061	0.723	0.307	0	Mac 1
gapdhs1	0	0.697582	0.963	0.853	0	Mac 1
pdcd6ip	0	0.684892	0.732	0.318	0	Mac 1
slc22a21	0	0.684675	0.656	0.256	0	Mac 1
si:dkey-42i9.6	0	0.68448	0.817	0.418	0	Mac 1
prss16	0	0.683296	0.609	0.186	0	Mac 1
abcg2a	0	0.681997	0.348	0.042	0	Mac 1
itgae.1	0	0.681817	0.65	0.24	0	Mac 1
id2a	0	0.681765	0.598	0.254	0	Mac 1
itgb7	0	0.680891	0.485	0.092	0	Mac 1
mrc1b	0	0.67871	0.681	0.281	0	Mac 1
mpeg1.1	0	0.677553	0.85	0.41	0	Mac 1
me1	0	0.677149	0.572	0.183	0	Mac 1
tnfrsf9a	0	0.673746	0.464	0.146	0	Mac 1
atp2b4	0	0.671299	0.739	0.329	0	Mac 1
calm3a.11	0	0.671116	0.518	0.232	0	Mac 1
tmem176l.4	0	0.670939	0.318	0.071	0	Mac 1
xrcc4	0	0.667508	0.509	0.14	0	Mac 1
zgc:64065	0	0.66533	0.424	0.107	0	Mac 1
zgc:136870	0	0.665147	0.589	0.178	0	Mac 1
lgals2a	0	0.663955	0.942	0.584	0	Mac 1
niban2b	0	0.663842	0.593	0.243	0	Mac 1
tmem189	0	0.662832	0.709	0.305	0	Mac 1
tnika	0	0.661351	0.452	0.09	0	Mac 1
dnase2	0	0.660599	0.562	0.148	0	Mac 1
MYADM.1	0	0.651926	0.346	0.038	0	Mac 1
atp6ap2	0	0.645178	0.878	0.545	0	Mac 1
atp5mc1	0	0.644443	0.788	0.509	0	Mac 1
DAB2	0	0.64319	0.513	0.179	0	Mac 1
vps35	0	0.641576	0.638	0.258	0	Mac 1
illr1	0	0.640424	0.297	0.055	0	Mac 1
m6pr	0	0.639251	0.741	0.345	0	Mac 1
ppib	0	0.638614	0.851	0.541	0	Mac 1
scarb2a	0	0.636795	0.693	0.293	0	Mac 1
slc31a1	0	0.631506	0.597	0.199	0	Mac 1
si:ch211-283g2.2	0	0.630428	0.466	0.154	0	Mac 1
calr3b	0	0.629427	0.523	0.228	0	Mac 1
MDFIC	0	0.628765	0.48	0.122	0	Mac 1
enosf1	0	0.627877	0.603	0.204	0	Mac 1
atp6v1c1a	0	0.625812	0.629	0.23	0	Mac 1
CABZ01020840.1	0	0.62575	0.58	0.201	0	Mac 1
epb41l3b	0	0.623348	0.469	0.085	0	Mac 1
plaua	0	0.621822	0.459	0.175	0	Mac 1
capgb1	0	0.61966	0.774	0.474	0	Mac 1
arhgef12b	0	0.616935	0.528	0.141	0	Mac 1
paox1	0	0.613189	0.516	0.14	0	Mac 1
dip2ba	0	0.612178	0.646	0.258	0	Mac 1
tagln21	0	0.61204	0.891	0.732	0	Mac 1
rbm47	0	0.610982	0.564	0.179	0	Mac 1
eepd1	0	0.604573	0.553	0.179	0	Mac 1
sdc4	0	0.603864	0.921	0.515	0	Mac 1
tmem104	0	0.602735	0.455	0.1	0	Mac 1
atic	0	0.601132	0.251	0.034	0	Mac 1
glb1	0	0.599675	0.45	0.094	0	Mac 1
anxa1a	0	0.597521	0.779	0.479	0	Mac 1
si:rp71-46j2.7	0	0.59749	0.332	0.111	0	Mac 1
chmp4ba	0	0.59634	0.861	0.521	0	Mac 1
agpat3	0	0.595765	0.386	0.098	0	Mac 1
ap2s1	0	0.595573	0.681	0.314	0	Mac 1
ccl35.1	0	0.59439	0.924	0.597	0	Mac 1
zgc:64065.1	0	0.593241	0.346	0.082	0	Mac 1
tgm1l1	0	0.587997	0.556	0.229	0	Mac 1
slc7a8a	0	0.585746	0.432	0.134	0	Mac 1
dbi	0	0.580139	0.857	0.565	0	Mac 1
bsg	0	0.579515	0.894	0.568	0	Mac 1
acvrl1	0	0.578014	0.417	0.076	0	Mac 1
rap1b	0	0.57736	0.896	0.634	0	Mac 1
glb1l	0	0.576379	0.652	0.317	0	Mac 1
snx5	0	0.575697	0.685	0.3	0	Mac 1
atp13a2	0	0.573624	0.387	0.071	0	Mac 1
COX5B.1	0	0.573244	0.663	0.48	0	Mac 1
SCARF2	0	0.569618	0.391	0.064	0	Mac 1
dicp2.1	0	0.568956	0.375	0.086	0	Mac 1
ckbb	0	0.568643	0.79	0.353	0	Mac 1
fkbp2	0	0.567877	0.707	0.333	0	Mac 1
rpz5	0	0.56605	0.752	0.308	0	Mac 1
npl	0	0.565352	0.706	0.34	0	Mac 1
grb2b	0	0.565135	0.804	0.45	0	Mac 1
ostm1	0	0.562231	0.526	0.156	0	Mac 1
rxrga1	0	0.561777	0.571	0.255	0	Mac 1
chmp1b	0	0.559652	0.809	0.467	0	Mac 1
sb:cb1058	0	0.558696	0.272	0.024	0	Mac 1
plekhb2	0	0.558456	0.523	0.14	0	Mac 1
rab14	0	0.554473	0.691	0.311	0	Mac 1
hsp90b1	0	0.552612	0.597	0.317	0	Mac 1
fthl28	0	0.551436	0.373	0.161	0	Mac 1
eif5a2	0	0.551269	0.775	0.438	0	Mac 1
slc16a10	0	0.550948	0.449	0.108	0	Mac 1
cox6a1	0	0.550157	0.875	0.639	0	Mac 1
ssuh2rs1	0	0.54704	0.532	0.188	0	Mac 1
lamp2	0	0.546449	0.579	0.214	0	Mac 1
tuba1b	0	0.539939	0.582	0.21	0	Mac 1
snx17	0	0.53812	0.563	0.219	0	Mac 1
atp7a	0	0.53353	0.445	0.104	0	Mac 1
capn2a	0	0.532461	0.474	0.146	0	Mac 1
rab8b	0	0.529914	0.872	0.586	0	Mac 1
slc15a4	0	0.529531	0.532	0.182	0	Mac 1
cpt1b	0	0.529348	0.295	0.041	0	Mac 1
ccl34a.4	0	0.528026	0.426	0.206	0	Mac 1
coq10b	0	0.528005	0.672	0.347	0	Mac 1
tex264a	0	0.527098	0.54	0.174	0	Mac 1
snx3	0	0.526536	0.711	0.359	0	Mac 1
pdgfba	0	0.526284	0.45	0.134	0	Mac 1
acsbg2	0	0.52615	0.445	0.135	0	Mac 1
dad1	0	0.524383	0.822	0.506	0	Mac 1
slc29a1b	0	0.522483	0.359	0.068	0	Mac 1
p4hb	0	0.520978	0.684	0.332	0	Mac 1
arpc5b1	0	0.519696	0.804	0.523	0	Mac 1
CABZ01041494.1	0	0.519628	0.543	0.21	0	Mac 1
gabarapa	0	0.518258	0.825	0.522	0	Mac 1
rxrgb	0	0.517524	0.379	0.064	0	Mac 1
pawr	0	0.51718	0.365	0.051	0	Mac 1
rac1a	0	0.515991	0.44	0.1	0	Mac 1
lamtor4	0	0.515913	0.742	0.397	0	Mac 1
metrnla	0	0.515782	0.588	0.259	0	Mac 1
pdia3	0	0.515413	0.82	0.503	0	Mac 1
spns1	0	0.515261	0.429	0.108	0	Mac 1
tmem167a	0	0.514746	0.61	0.251	0	Mac 1
cycsb	0	0.514229	0.871	0.668	0	Mac 1
sh3bgrl3	0	0.511626	0.74	0.433	0	Mac 1
psen2	0	0.511249	0.501	0.14	0	Mac 1
map7d1b	0	0.50703	0.513	0.157	0	Mac 1
kitlga	0	0.502946	0.339	0.038	0	Mac 1
cybrd1	0	0.502022	0.442	0.118	0	Mac 1
lgals9l11	0	0.498037	0.635	0.363	0	Mac 1
mfap4	0	0.495199	0.791	0.407	0	Mac 1
csf1ra	0	0.492382	0.547	0.195	0	Mac 1
ap2m1a	0	0.491877	0.822	0.492	0	Mac 1
atp1b1a	0	0.490174	0.912	0.691	0	Mac 1
tmed5	0	0.490062	0.384	0.085	0	Mac 1
cltca	0	0.489458	0.675	0.329	0	Mac 1
pdcd10a	0	0.488661	0.705	0.359	0	Mac 1
abcc5	0	0.48832	0.508	0.18	0	Mac 1
ssr2	0	0.486741	0.847	0.532	0	Mac 1
sept8a	0	0.486117	0.451	0.12	0	Mac 1
slc66a11	0	0.485479	0.536	0.219	0	Mac 1
atp2b1b	0	0.485015	0.4	0.102	0	Mac 1
flvcr2b	0	0.484983	0.497	0.15	0	Mac 1
xpr1b	0	0.484167	0.472	0.134	0	Mac 1
ssr3	0	0.484051	0.814	0.487	0	Mac 1
lamtor5	0	0.48361	0.747	0.411	0	Mac 1
ncf2	0	0.482889	0.728	0.441	0	Mac 1
sik1	0	0.477888	0.763	0.473	0	Mac 1
slc43a2a	0	0.477137	0.393	0.1	0	Mac 1
gm2a	0	0.476154	0.733	0.378	0	Mac 1
mroh1	0	0.474548	0.398	0.115	0	Mac 1
crybg1a	0	0.474161	0.345	0.075	0	Mac 1
glmp	0	0.473283	0.54	0.188	0	Mac 1
f13a1b	0	0.472367	0.693	0.337	0	Mac 1
eif4ebp1	0	0.471977	0.741	0.432	0	Mac 1
eno1b	0	0.471611	0.361	0.078	0	Mac 1
flna	0	0.470856	0.749	0.415	0	Mac 1
galk1	0	0.470836	0.429	0.122	0	Mac 1
macf1a	0	0.468144	0.587	0.208	0	Mac 1
si:ch211-39i2.2	0	0.468072	0.618	0.295	0	Mac 1
anxa4	0	0.467014	0.883	0.57	0	Mac 1
sgk2b	0	0.466255	0.321	0.049	0	Mac 1
napab	0	0.465278	0.59	0.24	0	Mac 1
tmem258	0	0.464329	0.82	0.509	0	Mac 1
mtbl	0	0.463825	0.286	0.037	0	Mac 1
pi4kb	0	0.463537	0.591	0.232	0	Mac 1
esyt2a	0	0.463287	0.401	0.116	0	Mac 1
plk3	0	0.462391	0.487	0.162	0	Mac 1
si:dkey-1h24.6	0	0.462366	0.449	0.149	0	Mac 1
vma21	0	0.462236	0.709	0.349	0	Mac 1
commd8	0	0.460991	0.485	0.157	0	Mac 1
zgc:153184	0	0.458702	0.38	0.083	0	Mac 1
micall2b	0	0.458593	0.402	0.127	0	Mac 1
spi1b1	0	0.457963	0.944	0.74	0	Mac 1
rab10	0	0.456527	0.648	0.306	0	Mac 1
washc2c	0	0.45617	0.62	0.286	0	Mac 1
calm3b	0	0.455204	0.654	0.358	0	Mac 1
itga5	0	0.454023	0.389	0.111	0	Mac 1
pdcd6	0	0.452354	0.628	0.283	0	Mac 1
fuca1.1	0	0.448182	0.374	0.092	0	Mac 1
esyt1a	0	0.446914	0.329	0.051	0	Mac 1
slc16a1b	0	0.445863	0.396	0.108	0	Mac 1
etfb	0	0.44529	0.594	0.241	0	Mac 1
uqcrh	0	0.444633	0.822	0.518	0	Mac 1
selenof	0	0.442186	0.817	0.536	0	Mac 1
arf2a	0	0.441852	0.663	0.319	0	Mac 1
rab5aa	0	0.44094	0.701	0.364	0	Mac 1
rin3	0	0.440544	0.589	0.254	0	Mac 1
rp2	0	0.439579	0.573	0.235	0	Mac 1
tmem9b	0	0.438724	0.494	0.164	0	Mac 1
rassf2a	0	0.43828	0.665	0.327	0	Mac 1
rbms1a	0	0.437859	0.432	0.124	0	Mac 1
sept2	0	0.434092	0.627	0.325	0	Mac 1
gnsb	0	0.433258	0.326	0.055	0	Mac 1
mbnl2	0	0.43121	0.464	0.15	0	Mac 1
eif4bb	0	0.429292	0.631	0.294	0	Mac 1
zgc:1655731	0	0.42929	0.596	0.304	0	Mac 1
ssr4	0	0.428626	0.797	0.478	0	Mac 1
mcl1b1	0	0.427328	0.872	0.568	0	Mac 1
atp6v1e1a	0	0.427281	0.615	0.279	0	Mac 1
cd276	0	0.426946	0.327	0.052	0	Mac 1
hectd1	0	0.426567	0.622	0.289	0	Mac 1
chmp5b	0	0.4255	0.822	0.517	0	Mac 1
cd81a	0	0.424331	0.848	0.539	0	Mac 1
tuba8l4	0	0.421142	0.94	0.797	0	Mac 1
efhd21	0	0.420149	0.785	0.528	0	Mac 1
uap1l1	0	0.419346	0.41	0.143	0	Mac 1
nfkbie	0	0.419308	0.787	0.489	0	Mac 1
myh9b	0	0.417032	0.535	0.243	0	Mac 1
gabarapb	0	0.416785	0.897	0.666	0	Mac 1
grapa1	0	0.416252	0.612	0.262	0	Mac 1
slc11a2	0	0.415702	0.444	0.149	0	Mac 1
psmb1	0	0.415131	0.755	0.468	0	Mac 1
mdh1aa	0	0.415095	0.692	0.336	0	Mac 1
ap2a1	0	0.414463	0.6	0.275	0	Mac 1
ccdc47	0	0.413124	0.522	0.208	0	Mac 1
ppap2d	0	0.413007	0.274	0.038	0	Mac 1
cyth3a	0	0.412865	0.293	0.045	0	Mac 1
ctbs	0	0.412657	0.332	0.073	0	Mac 1
icam3	0	0.411196	0.68	0.32	0	Mac 1
pdia6	0	0.410213	0.46	0.195	0	Mac 1
slc38a7	0	0.409191	0.322	0.061	0	Mac 1
dync1i2a	0	0.408905	0.538	0.221	0	Mac 1
abracl1	0	0.40854	0.827	0.549	0	Mac 1
ano9a	0	0.406308	0.358	0.105	0	Mac 1
uevld	0	0.404624	0.43	0.134	0	Mac 1
arl6ip5b	0	0.404224	0.536	0.241	0	Mac 1
slc36a1	0	0.403611	0.33	0.065	0	Mac 1
rab32a	0	0.402676	0.691	0.347	0	Mac 1
mospd2	0	0.402277	0.421	0.128	0	Mac 1
mhc1lda	0	0.402064	0.278	0.069	0	Mac 1
calm3a	0	0.401957	0.632	0.43	0	Mac 1
me2	0	0.401941	0.44	0.142	0	Mac 1
tnfrsf9b	0	0.401315	0.4	0.162	0	Mac 1
plp2	0	0.40117	0.457	0.171	0	Mac 1
gnpda2	0	0.40112	0.38	0.1	0	Mac 1
csde1	0	0.401078	0.79	0.474	0	Mac 1
atg3	0	0.401013	0.473	0.175	0	Mac 1
ppp2r1bb	0	0.400611	0.389	0.113	0	Mac 1
arrdc2	0	0.399825	0.398	0.155	0	Mac 1
reep3a	0	0.398637	0.299	0.047	0	Mac 1
tax1bp3	0	0.396938	0.472	0.162	0	Mac 1
cfp	0	0.39447	0.645	0.335	0	Mac 1
si:ch211-122f10.4	0	0.393679	0.369	0.102	0	Mac 1
wasf21	0	0.393015	0.685	0.368	0	Mac 1
tmem50a	0	0.392343	0.605	0.263	0	Mac 1
rab11a	0	0.39171	0.69	0.36	0	Mac 1
nudt5	0	0.39146	0.384	0.103	0	Mac 1
serinc2	0	0.390105	0.701	0.369	0	Mac 1
slc39a7	0	0.388262	0.408	0.151	0	Mac 1
snrpf	0	0.388094	0.611	0.338	0	Mac 1
cfl11	0	0.387737	0.975	0.901	0	Mac 1
tubb4b1	0	0.3871	0.947	0.769	0	Mac 1
fam210b1	0	0.386054	0.442	0.17	0	Mac 1
clcn7	0	0.385736	0.481	0.178	0	Mac 1
bloc1s2	0	0.385697	0.576	0.249	0	Mac 1
mrpl331	0	0.384283	0.648	0.354	0	Mac 1
mertka	0	0.384282	0.258	0.067	0	Mac 1
akr7a3	0	0.384132	0.404	0.13	0	Mac 1
ywhaba1	0	0.383409	0.892	0.677	0	Mac 1
matk	0	0.38286	0.471	0.208	0	Mac 1
ddost	0	0.382486	0.571	0.263	0	Mac 1
kif13ba	0	0.382254	0.368	0.094	0	Mac 1
ctsf	0	0.382129	0.308	0.064	0	Mac 1
rcan1a	0	0.381305	0.421	0.169	0	Mac 1
arhgap5	0	0.38111	0.374	0.1	0	Mac 1
snx4	0	0.380782	0.452	0.152	0	Mac 1
atp6v1aa	0	0.380262	0.463	0.172	0	Mac 1
tfeb	0	0.379333	0.387	0.169	0	Mac 1
prpsap2	0	0.379152	0.477	0.168	0	Mac 1
fam53b1	0	0.379018	0.682	0.355	0	Mac 1
adam9	0	0.377341	0.437	0.129	0	Mac 1
ubqln4	0	0.377291	0.534	0.217	0	Mac 1
LO018340.1	0	0.376825	0.402	0.118	0	Mac 1
scarb1	0	0.37599	0.283	0.042	0	Mac 1
fermt3a	0	0.373594	0.639	0.383	0	Mac 1
tfg	0	0.372849	0.513	0.207	0	Mac 1
si:ch73-199g24.2	0	0.372798	0.418	0.133	0	Mac 1
amdhd2	0	0.372443	0.421	0.136	0	Mac 1
tpte	0	0.37186	0.504	0.138	0	Mac 1
zgc:640511	0	0.370245	0.932	0.774	0	Mac 1
entpd2a.1	0	0.370214	0.384	0.14	0	Mac 1
zgc:113232	0	0.369395	0.273	0.072	0	Mac 1
havcr2	0	0.369323	0.341	0.112	0	Mac 1
myofl	0	0.369211	0.325	0.084	0	Mac 1
nus1	0	0.36868	0.351	0.088	0	Mac 1
rnf128a	0	0.368609	0.388	0.119	0	Mac 1
tp53inp1	0	0.368423	0.33	0.091	0	Mac 1
tmem165	0	0.367957	0.473	0.18	0	Mac 1
si:dkey-238d18.5	0	0.367764	0.297	0.075	0	Mac 1
clcn3	0	0.367714	0.362	0.112	0	Mac 1
dtnbp1a	0	0.366292	0.431	0.143	0	Mac 1
rrbp1a	0	0.365608	0.435	0.164	0	Mac 1
zmiz1a	0	0.365475	0.407	0.136	0	Mac 1
si:dkey-27i16.2	0	0.364603	0.909	0.653	0	Mac 1
calr3a	0	0.364154	0.568	0.289	0	Mac 1
CU694197.1	0	0.36385	0.662	0.353	0	Mac 1
npepps	0	0.363828	0.376	0.134	0	Mac 1
tmem144a	0	0.363553	0.291	0.048	0	Mac 1
gmfb	0	0.363492	0.41	0.131	0	Mac 1
cln3	0	0.362766	0.333	0.087	0	Mac 1
wipf1b	0	0.362388	0.604	0.283	0	Mac 1
fthl27	0	0.362107	0.978	0.878	0	Mac 1
sec61b	0	0.362011	0.761	0.459	0	Mac 1
mfsd12a	0	0.361388	0.282	0.045	0	Mac 1
zfhx3	0	0.360811	0.47	0.187	0	Mac 1
tmem199	0	0.360367	0.506	0.19	0	Mac 1
hmox1a	0	0.358109	0.722	0.373	0	Mac 1
copb2	0	0.358046	0.582	0.279	0	Mac 1
arl8ba	0	0.3565	0.525	0.22	0	Mac 1
rasgef1ba	0	0.356348	0.742	0.425	0	Mac 1
tspan37	0	0.356329	0.534	0.245	0	Mac 1
pacc1	0	0.355259	0.337	0.092	0	Mac 1
si:ch211-243a20.4	0	0.355137	0.622	0.314	0	Mac 1
ndufb3	0	0.353932	0.751	0.433	0	Mac 1
si:ch1073-325m22.2	0	0.352947	0.605	0.369	0	Mac 1
nupr1a	0	0.35102	0.457	0.241	0	Mac 1
pigrl2.3.1	0	0.350572	0.266	0.056	0	Mac 1
snrpg	0	0.350058	0.57	0.292	0	Mac 1
nfe2l2a	0	0.349712	0.798	0.493	0	Mac 1
zfp36l1a	0	0.349062	0.419	0.163	0	Mac 1
rab5b	0	0.348866	0.481	0.178	0	Mac 1
dock4b	0	0.348622	0.376	0.122	0	Mac 1
gna12a	0	0.348519	0.329	0.071	0	Mac 1
ehd4	0	0.348088	0.493	0.198	0	Mac 1
tollip	0	0.347776	0.608	0.297	0	Mac 1
plekho1b1	0	0.346275	0.827	0.513	0	Mac 1
stam	0	0.345661	0.369	0.102	0	Mac 1
zgc:1538671	0	0.345137	0.902	0.739	0	Mac 1
hspg2	0	0.344573	0.253	0.031	0	Mac 1
rab7b	0	0.344516	0.331	0.072	0	Mac 1
cc2d1b	0	0.342408	0.339	0.094	0	Mac 1
psmd1	0	0.342331	0.543	0.25	0	Mac 1
myo9b	0	0.340888	0.457	0.167	0	Mac 1
abca3b	0	0.340205	0.314	0.076	0	Mac 1
smad1	0	0.340086	0.299	0.063	0	Mac 1
slc23a2	0	0.339624	0.321	0.092	0	Mac 1
parp8	0	0.338071	0.545	0.294	0	Mac 1
tmem176l.1	0	0.337313	0.794	0.455	0	Mac 1
tsg101b	0	0.337199	0.493	0.203	0	Mac 1
txn	0	0.336512	0.804	0.558	0	Mac 1
trappc2l	0	0.336241	0.466	0.176	0	Mac 1
spred1	0	0.335865	0.356	0.105	0	Mac 1
slc49a4	0	0.331806	0.355	0.11	0	Mac 1
lamtor2	0	0.331274	0.531	0.238	0	Mac 1
akr1a1b	0	0.330743	0.396	0.153	0	Mac 1
si:zfos-943e10.11	0	0.330301	0.394	0.183	0	Mac 1
vkorc1l1	0	0.33023	0.296	0.079	0	Mac 1
creb3l3l	0	0.328611	0.643	0.35	0	Mac 1
ndufc2	0	0.328536	0.688	0.371	0	Mac 1
zgc:175088	0	0.32687	0.529	0.253	0	Mac 1
ube2v2	0	0.326792	0.879	0.658	0	Mac 1
plxnc11	0	0.326084	0.748	0.479	0	Mac 1
glud1b	0	0.326002	0.492	0.207	0	Mac 1
cdc42se1	0	0.325778	0.411	0.14	0	Mac 1
txnipa	0	0.324918	0.825	0.568	0	Mac 1
mcoln1a	0	0.324686	0.267	0.077	0	Mac 1
snx1a	0	0.3241	0.487	0.202	0	Mac 1
si:ch73-92i20.1.1	0	0.322088	0.311	0.067	0	Mac 1
cdkn1ba	0	0.321475	0.281	0.1	0	Mac 1
inpp5l	0	0.321163	0.398	0.133	0	Mac 1
cs	0	0.320261	0.499	0.216	0	Mac 1
znf827	0	0.320187	0.35	0.101	0	Mac 1
eif5b	0	0.320115	0.553	0.268	0	Mac 1
tmed10	0	0.320068	0.7	0.409	0	Mac 1
aco2	0	0.319387	0.471	0.201	0	Mac 1
cyb5r1	0	0.318491	0.377	0.12	0	Mac 1
arpc4l1	0	0.317911	0.887	0.667	0	Mac 1
ctnnb1	0	0.317756	0.45	0.175	0	Mac 1
tfe3a	0	0.317504	0.424	0.171	0	Mac 1
TPGS1	0	0.317134	0.448	0.164	0	Mac 1
rhoca	0	0.317117	0.67	0.316	0	Mac 1
coro1ca	0	0.317085	0.487	0.199	0	Mac 1
ptp4a1	0	0.316251	0.537	0.248	0	Mac 1
fkbp1aa	0	0.315832	0.814	0.569	0	Mac 1
spg21	0	0.315645	0.439	0.158	0	Mac 1
cux1a	0	0.315305	0.364	0.132	0	Mac 1
eif2s2	0	0.315075	0.759	0.49	0	Mac 1
fnip1	0	0.314326	0.359	0.122	0	Mac 1
serinc1	0	0.313658	0.417	0.161	0	Mac 1
ehd1b	0	0.313249	0.272	0.061	0	Mac 1
laptm4a	0	0.31299	0.549	0.26	0	Mac 1
ogdha	0	0.312754	0.578	0.261	0	Mac 1
prdx2	0	0.312568	0.854	0.599	0	Mac 1
snx27a	0	0.312038	0.388	0.132	0	Mac 1
chmp4bb1	0	0.311989	0.8	0.523	0	Mac 1
inppl1a	0	0.311944	0.296	0.059	0	Mac 1
mgat4a	0	0.311751	0.298	0.062	0	Mac 1
abcf1	0	0.31112	0.513	0.242	0	Mac 1
CR318588.3	0	0.310418	0.529	0.306	0	Mac 1
capns1b	0	0.310208	0.654	0.334	0	Mac 1
ncor2	0	0.310015	0.548	0.272	0	Mac 1
ttc39c	0	0.309405	0.431	0.175	0	Mac 1
nutf2	0	0.309304	0.446	0.175	0	Mac 1
vapb	0	0.309236	0.555	0.256	0	Mac 1
prkcq	0	0.308433	0.277	0.069	0	Mac 1
rab2a	0	0.308255	0.77	0.474	0	Mac 1
ywhaz	0	0.306734	0.81	0.553	0	Mac 1
calm1a	0	0.305903	0.663	0.372	0	Mac 1
capza1a1	0	0.305295	0.83	0.582	0	Mac 1
ndrg1a	0	0.305269	0.377	0.146	0	Mac 1
atp5mc3a	0	0.305014	0.734	0.445	0	Mac 1
C7H16orf87	0	0.304959	0.27	0.058	0	Mac 1
cst3	0	0.304284	0.493	0.21	0	Mac 1
uqcrfs1	0	0.304218	0.744	0.451	0	Mac 1
vps29	0	0.303574	0.687	0.374	0	Mac 1
OSBP2	0	0.30327	0.261	0.057	0	Mac 1
ndufa10	0	0.302977	0.557	0.261	0	Mac 1
ccr9a1	0	0.302974	0.775	0.487	0	Mac 1
krtcap2	0	0.302527	0.66	0.356	0	Mac 1
acsl4a	0	0.301896	0.536	0.261	0	Mac 1
pfdn2	0	0.300877	0.44	0.172	0	Mac 1
nufip2	0	0.300734	0.454	0.186	0	Mac 1
fuca1.2	0	0.299525	0.309	0.084	0	Mac 1
zgc:101858	0	0.29951	0.371	0.122	0	Mac 1
arpc1a	0	0.299508	0.497	0.209	0	Mac 1
ube2v1	0	0.298817	0.656	0.346	0	Mac 1
oxsr1a	0	0.298661	0.474	0.2	0	Mac 1
mpv17l2	0	0.298547	0.268	0.058	0	Mac 1
qki2	0	0.298127	0.251	0.048	0	Mac 1
pfkfb3	0	0.296286	0.407	0.215	0	Mac 1
si:ch211-217k17.11	0	0.295487	0.255	0.048	0	Mac 1
hyou1	0	0.294487	0.389	0.173	0	Mac 1
dynlrb1.1	0	0.294123	0.507	0.249	0	Mac 1
clul1.1	0	0.293912	0.324	0.094	0	Mac 1
rgl1	0	0.293516	0.331	0.113	0	Mac 1
plekhm1	0	0.293265	0.301	0.078	0	Mac 1
kdelr2b	0	0.292998	0.476	0.211	0	Mac 1
C18H15orf48	0	0.29267	0.532	0.295	0	Mac 1
ap3d1	0	0.292343	0.439	0.175	0	Mac 1
dync1li2	0	0.291714	0.431	0.172	0	Mac 1
cd2ap	0	0.290892	0.37	0.129	0	Mac 1
kdelr2a	0	0.29068	0.435	0.176	0	Mac 1
dok2	0	0.290263	0.585	0.288	0	Mac 1
bloc1s6	0	0.288922	0.577	0.265	0	Mac 1
cox7c	0	0.288893	0.857	0.616	0	Mac 1
appa	0	0.28875	0.422	0.149	0	Mac 1
soga1	0	0.288632	0.285	0.075	0	Mac 1
pigrl2.31	0	0.287848	0.443	0.236	0	Mac 1
rbx1	0	0.28747	0.778	0.498	0	Mac 1
ap3s2	0	0.286766	0.404	0.136	0	Mac 1
fis1	0	0.285745	0.495	0.227	0	Mac 1
cpne1	0	0.285728	0.682	0.401	0	Mac 1
adtrp1	0	0.285632	0.362	0.128	0	Mac 1
arl8bb	0	0.285296	0.335	0.095	0	Mac 1
gde1	0	0.284652	0.299	0.079	0	Mac 1
si:cabz01102082.1	0	0.282696	0.331	0.104	0	Mac 1
adi1	0	0.281643	0.342	0.113	0	Mac 1
lsm6	0	0.281349	0.515	0.252	0	Mac 1
snrpd2	0	0.281083	0.592	0.338	0	Mac 1
mrpl34	0	0.280917	0.522	0.222	0	Mac 1
hmgb3b	0	0.280226	0.499	0.209	0	Mac 1
gale	0	0.279795	0.366	0.127	0	Mac 1
vps26bl	0	0.279642	0.317	0.093	0	Mac 1
ostc	0	0.27948	0.573	0.288	0	Mac 1
cisd1	0	0.279141	0.304	0.077	0	Mac 1
vdac3	0	0.278427	0.557	0.213	0	Mac 1
C19H6orf62	0	0.277719	0.548	0.287	0	Mac 1
manf	0	0.277137	0.406	0.183	0	Mac 1
pik3r6a	0	0.275967	0.303	0.089	0	Mac 1
krt18a.1	0	0.274512	0.263	0.078	0	Mac 1
fbxw11b	0	0.274466	0.534	0.252	0	Mac 1
myo9ab	0	0.274343	0.382	0.142	0	Mac 1
rhbdf1a	0	0.27358	0.569	0.294	0	Mac 1
atp5fa1	0	0.273295	0.862	0.611	0	Mac 1
man2b1	0	0.271532	0.414	0.163	0	Mac 1
elovl1b1	0	0.270735	0.871	0.577	0	Mac 1
rpn1	0	0.270015	0.469	0.206	0	Mac 1
cpda	0	0.26994	0.329	0.112	0	Mac 1
hexa	0	0.269752	0.335	0.113	0	Mac 1
vamp3	0	0.269628	0.715	0.431	0	Mac 1
psmc5	0	0.269158	0.525	0.246	0	Mac 1
psmd12	0	0.267604	0.434	0.189	0	Mac 1
ap2b1	0	0.26714	0.479	0.215	0	Mac 1
si:ch211-194m7.3	0	0.265133	0.792	0.414	0	Mac 1
hgs	0	0.265096	0.37	0.134	0	Mac 1
ctns	0	0.264996	0.362	0.129	0	Mac 1
si:ch73-158p21.3	0	0.263679	0.325	0.137	0	Mac 1
hadhb	0	0.263565	0.506	0.216	0	Mac 1
rnf10	0	0.263525	0.67	0.389	0	Mac 1
eif5	0	0.263243	0.832	0.562	0	Mac 1
edf1	0	0.263131	0.824	0.561	0	Mac 1
psma8	0	0.262586	0.732	0.473	0	Mac 1
trim105	0	0.262209	0.291	0.09	0	Mac 1
llgl2	0	0.262122	0.336	0.122	0	Mac 1
pora	0	0.261695	0.461	0.203	0	Mac 1
diaph2	0	0.26128	0.399	0.155	0	Mac 1
glud1a	0	0.261158	0.381	0.176	0	Mac 1
rps27l	0	0.260805	0.527	0.29	0	Mac 1
fahd2a	0	0.259987	0.349	0.125	0	Mac 1
psmb6	0	0.25943	0.7	0.412	0	Mac 1
mapkapk2a	0	0.259372	0.697	0.395	0	Mac 1
uqcrc1	0	0.259321	0.617	0.327	0	Mac 1
aph1b	0	0.258916	0.354	0.122	0	Mac 1
mlec	0	0.258786	0.278	0.082	0	Mac 1
cdv3	0	0.258676	0.602	0.317	0	Mac 1
man2b2	0	0.258642	0.259	0.066	0	Mac 1
arhgdia	0	0.258511	0.85	0.612	0	Mac 1
ccdc22	0	0.25845	0.319	0.101	0	Mac 1
znf609b	0	0.257925	0.266	0.069	0	Mac 1
adgrg31	0	0.257691	0.612	0.351	0	Mac 1
tie1	0	0.257566	0.279	0.075	0	Mac 1
uqcr10	0	0.256347	0.715	0.429	0	Mac 1
vps41	0	0.256129	0.354	0.118	0	Mac 1
got2b	0	0.255202	0.6	0.32	0	Mac 1
ndfip21	0	0.254728	0.588	0.3	0	Mac 1
mlx1	0	0.254371	0.553	0.285	0	Mac 1
dynlt3	0	0.254078	0.675	0.37	0	Mac 1
golga7	0	0.253886	0.54	0.251	0	Mac 1
dpf2	0	0.253545	0.366	0.141	0	Mac 1
cd9a	0	0.253484	0.358	0.139	0	Mac 1
ppp1r12a1	0	0.253025	0.585	0.314	0	Mac 1
copb1	0	0.251855	0.423	0.181	0	Mac 1
arl6ip5a	0	0.25158	0.255	0.068	0	Mac 1
rab3il1	0	0.251402	0.306	0.093	0	Mac 1
snrpe	0	0.251223	0.555	0.313	0	Mac 1
dnajc5ab	0	0.250863	0.57	0.292	0	Mac 1
dnajb11	0	0.250637	0.339	0.136	0	Mac 1
tbc1d1	0	0.250337	0.316	0.101	0	Mac 1
grn2	1.58857e-303	0.946699	0.531	0.309	3.16363e-299	Mac 1
tpm31	1.59184e-300	0.269881	0.823	0.602	3.17016e-296	Mac 1
marcksl1a	2.17208e-297	0.320271	0.921	0.754	4.32569e-293	Mac 1
napsa1	5.54475e-263	0.250903	0.851	0.588	1.10424e-258	Mac 1
ndufa4l	1.82483e-261	0.250402	0.908	0.726	3.63414e-257	Mac 1
actb11	1.21779e-260	0.473848	0.976	0.919	2.42524e-256	Mac 1
gadd45ga1	9.1598e-210	0.347243	0.273	0.143	1.82417e-205	Mac 1
crip11	5.86034e-194	0.335227	0.932	0.809	1.16709e-189	Mac 1
rnaset2l	5.10541e-180	0.259675	0.351	0.214	1.01674e-175	Mac 1
NC-002333.4	0	1.78712	0.712	0.717	0	Mac 2
mt-cyb	0	1.37438	0.979	0.988	0	Mac 2
mt-nd1	0	1.33008	0.877	0.94	0	Mac 2
NC-002333.17	0	1.31175	0.709	0.716	0	Mac 2
mt-atp6	0	1.30355	0.961	0.979	0	Mac 2
mt-nd4	0	1.25363	0.808	0.913	0	Mac 2
mt-co2	0	1.25044	0.991	0.993	0	Mac 2
mt-nd2	0	1.24569	0.74	0.872	0	Mac 2
mt-co3	0	1.21854	0.989	0.99	0	Mac 2
mt-co1	0	1.02606	0.94	0.975	0	Mac 2
hbaa1	0	0.726038	0.559	0.263	0	Mac 2
hbba1.1	0	0.544984	0.646	0.347	0	Mac 2
si:ch211-5k11.8	0	0.497577	0.589	0.301	0	Mac 2
hbba1	0	0.496399	0.391	0.141	0	Mac 2
ndufb2	0	0.269547	0.164	0.501	0	Mac 2
fabp11a1	1.74267e-280	0.841647	0.484	0.379	3.47052e-276	Mac 2
vmp11	4.08426e-251	0.296054	0.23	0.484	8.13381e-247	Mac 2
mef2cb1	1.77673e-249	0.268552	0.118	0.311	3.53836e-245	Mac 2
tgm1l11	2.14001e-218	0.373905	0.112	0.288	4.26183e-214	Mac 2
myl7	1.73653e-192	0.537873	0.321	0.222	3.45829e-188	Mac 2
trpv11	8.97099e-192	0.270434	0.127	0.296	1.78657e-187	Mac 2
fosb	4.53269e-191	0.28567	0.139	0.314	9.02686e-187	Mac 2
enpp11	3.23399e-140	0.437103	0.157	0.316	6.44048e-136	Mac 2
abca1b1	7.75415e-131	0.449045	0.178	0.342	1.54424e-126	Mac 2
krt18b1	6.15454e-116	0.333942	0.705	0.665	1.22568e-111	Mac 2
zgc:158463	3.21464e-67	1.18571	0.209	0.354	6.40196e-63	Mac 2
ak1	2.82545e-62	0.346674	0.22	0.354	5.62689e-58	Mac 2
mt-nd3	9.34558e-52	1.18424	0.527	0.731	1.86117e-47	Mac 2
mafbb1	2.63948e-46	0.250911	0.182	0.275	5.25653e-42	Mac 2
tcima1	1.93465e-34	0.288596	0.221	0.323	3.85286e-30	Mac 2
mrc1b1	2.24319e-31	0.360039	0.241	0.339	4.4673e-27	Mac 2
CR383676.2	1.68408e-15	0.817572	0.699	0.724	3.35385e-11	Mac 2
havcr11	2.78384e-10	0.311316	0.314	0.398	5.54402e-06	Mac 2
cd9b1	2.45874e-06	0.274045	0.229	0.278	0.0489657	Mac 2
ahnak1	8.50817e-06	0.818461	0.363	0.469	0.16944	Mac 2
mt-nd5	2.19575e-05	0.900815	0.447	0.703	0.437285	Mac 2
anxa2a1	0.000689574	0.3092	0.33	0.397	1	Mac 2
vcanb1	0.00958534	0.543504	0.219	0.254	1	Mac 2
si:ch1073-67j19.11	0	2.53784	0.605	0.196	0	Neu 2
si:ch211-284o19.81	0	2.53467	0.865	0.262	0	Neu 2
si:dkey-102g19.31	0	2.22634	0.945	0.485	0	Neu 2
plekhf11	0	2.21516	0.627	0.211	0	Neu 2
zgc:771121	0	2.18562	0.899	0.309	0	Neu 2
si:dkey-27h10.21	0	2.15766	0.873	0.331	0	Neu 2
cox6a21	0	2.11443	0.87	0.258	0	Neu 2
il1b1	0	2.09073	0.75	0.315	0	Neu 2
tcnbb1	0	2.07312	0.868	0.403	0	Neu 2
zgc:158343	0	2.05648	0.799	0.48	0	Neu 2
atf31	0	2.02727	0.883	0.426	0	Neu 2
ncf11	0	2.02166	0.9	0.551	0	Neu 2
sri1	0	1.99134	0.937	0.585	0	Neu 2
illr41	0	1.9536	0.88	0.259	0	Neu 2
si:ch211-9d9.11	0	1.92687	0.906	0.308	0	Neu 2
f3b	0	1.92158	0.354	0.151	0	Neu 2
si:dkey-195m11.111	0	1.92053	0.801	0.253	0	Neu 2
BX908782.21	0	1.91913	0.954	0.474	0	Neu 2
itln11	0	1.91503	0.584	0.113	0	Neu 2
lect2l1	0	1.91186	0.97	0.387	0	Neu 2
tnfb	0	1.85932	0.565	0.277	0	Neu 2
aif1l1	0	1.79084	0.875	0.477	0	Neu 2
cxcr11	0	1.77709	0.735	0.178	0	Neu 2
CR855311.11	0	1.71639	0.708	0.413	0	Neu 2
cfl1l1	0	1.69052	0.79	0.191	0	Neu 2
cfbl1	0	1.65604	0.922	0.507	0	Neu 2
si:dkey-19b23.141	0	1.64467	0.614	0.124	0	Neu 2
hbegfa1	0	1.6425	0.681	0.224	0	Neu 2
thy11	0	1.63694	0.803	0.281	0	Neu 2
arg21	0	1.62144	0.786	0.276	0	Neu 2
scinlb1	0	1.62109	0.927	0.382	0	Neu 2
lsp1b1	0	1.56905	0.661	0.225	0	Neu 2
hk21	0	1.55563	0.836	0.424	0	Neu 2
mpx1	0	1.52548	0.844	0.211	0	Neu 2
cdaa1	0	1.49919	0.774	0.362	0	Neu 2
rhogb1	0	1.49904	0.895	0.584	0	Neu 2
prdx11	0	1.48068	0.657	0.271	0	Neu 2
egr1	0	1.47591	0.638	0.275	0	Neu 2
socs3a1	0	1.46751	0.874	0.575	0	Neu 2
alox5ap1	0	1.4471	0.804	0.389	0	Neu 2
egr2a	0	1.44549	0.443	0.196	0	Neu 2
batf31	0	1.44088	0.579	0.142	0	Neu 2
SMIM221	0	1.43898	0.792	0.295	0	Neu 2
zgc:1527911	1.02405e-272	1.4317	0.461	0.34	2.0394e-268	Neu 2
abhd2a1	0	1.43099	0.71	0.266	0	Neu 2
nccrp11	0	1.4184	0.89	0.538	0	Neu 2
unc13d1	0	1.39974	0.679	0.353	0	Neu 2
fcer1gl1	0	1.37601	0.932	0.57	0	Neu 2
selenow11	0	1.36144	0.969	0.776	0	Neu 2
vsir1	0	1.35898	0.892	0.529	0	Neu 2
marcksl1b	0	1.3554	0.605	0.429	0	Neu 2
adam8a1	0	1.34644	0.938	0.491	0	Neu 2
srgn1	0	1.32146	0.979	0.738	0	Neu 2
si:ch211-136m16.81	0	1.29896	0.795	0.384	0	Neu 2
tlr5b1	0	1.28	0.495	0.172	0	Neu 2
ldha1	0	1.27557	0.818	0.588	0	Neu 2
pgd1	0	1.27122	0.834	0.432	0	Neu 2
mrps151	0	1.2685	0.833	0.419	0	Neu 2
zgc:1528631	0	1.267	0.644	0.269	0	Neu 2
ier2a1	0	1.26054	0.763	0.502	0	Neu 2
lgals9l12	0	1.25985	0.644	0.363	0	Neu 2
pnp5a1	0	1.25728	0.915	0.573	0	Neu 2
gsr1	0	1.25687	0.695	0.313	0	Neu 2
ier2b	0	1.24036	0.844	0.592	0	Neu 2
lrrfip1a1	0	1.24004	0.854	0.508	0	Neu 2
ppdpfa1	0	1.23666	0.692	0.211	0	Neu 2
f81	0	1.2243	0.505	0.106	0	Neu 2
rgs21	0	1.2223	0.652	0.366	0	Neu 2
fybb1	0	1.22097	0.814	0.46	0	Neu 2
BX120005.2	0	1.21826	0.379	0.216	0	Neu 2
CABZ01078737.1	1.20813e-134	1.20656	0.308	0.23	2.40598e-130	Neu 2
trib31	0	1.20619	0.685	0.375	0	Neu 2
mid1ip1l1	0	1.19924	0.59	0.259	0	Neu 2
calm1b1	0	1.1746	0.643	0.242	0	Neu 2
gig2h1	0	1.16966	0.49	0.146	0	Neu 2
chia.61	0	1.1663	0.578	0.168	0	Neu 2
mapre1a1	0	1.15927	0.913	0.595	0	Neu 2
acsl4b1	0	1.15067	0.671	0.388	0	Neu 2
sult5a1	0	1.14946	0.271	0.065	0	Neu 2
si:ch73-248e21.71	0	1.14878	0.683	0.337	0	Neu 2
ARF51	0	1.14171	0.642	0.348	0	Neu 2
junbb	0	1.14081	0.576	0.312	0	Neu 2
socs3b1	0	1.13497	0.788	0.436	0	Neu 2
il6r1	0	1.12813	0.776	0.346	0	Neu 2
ptpn61	0	1.1212	0.851	0.608	0	Neu 2
dusp11	0	1.11511	0.802	0.557	0	Neu 2
bik	0	1.11159	0.313	0.058	0	Neu 2
hsd3b71	0	1.10913	0.434	0.082	0	Neu 2
si:ch211-193e13.51	0	1.09933	0.552	0.167	0	Neu 2
CU499336.21	0	1.09876	0.573	0.212	0	Neu 2
adam19b1	0	1.09464	0.509	0.132	0	Neu 2
lta4h1	0	1.08609	0.697	0.4	0	Neu 2
zgc:1629441	0	1.07921	0.901	0.672	0	Neu 2
aldocb1	0	1.07764	0.783	0.525	0	Neu 2
scpp81	0	1.07562	0.712	0.205	0	Neu 2
si:ch211-66e2.31	0	1.06513	0.796	0.431	0	Neu 2
mcl1b2	0	1.05912	0.859	0.571	0	Neu 2
cd7al1	0	1.05516	0.737	0.287	0	Neu 2
timp2b1	0	1.05113	0.925	0.562	0	Neu 2
spns31	0	1.04722	0.516	0.169	0	Neu 2
tnfsf181	0	1.0449	0.439	0.114	0	Neu 2
rab441	0	1.04428	0.785	0.461	0	Neu 2
birc21	0	1.04062	0.717	0.47	0	Neu 2
cox4i1l	0	1.03995	0.386	0.164	0	Neu 2
gadd45ab1	0	1.03922	0.409	0.129	0	Neu 2
cotl11	0	1.03749	0.985	0.824	0	Neu 2
cyba1	0	1.03736	0.85	0.593	0	Neu 2
plek1	0	1.03452	0.793	0.499	0	Neu 2
si:cabz01036022.11	0	1.03281	0.572	0.238	0	Neu 2
hnrnpa0a1	0	1.03158	0.545	0.293	0	Neu 2
mcl1a1	0	1.02595	0.978	0.903	0	Neu 2
zgc:664271	0	1.02409	0.523	0.245	0	Neu 2
stk17b1	0	1.01545	0.719	0.393	0	Neu 2
si:ch73-248e21.51	0	1.01167	0.852	0.552	0	Neu 2
g6pd1	0	1.00988	0.548	0.21	0	Neu 2
myh9a1	0	1.00873	0.867	0.544	0	Neu 2
s1pr41	0	1.00022	0.548	0.215	0	Neu 2
hhla2a.11	0	0.996975	0.465	0.132	0	Neu 2
atg16l11	0	0.994557	0.515	0.197	0	Neu 2
ponzr62	0	0.992285	0.583	0.203	0	Neu 2
arhgdig1	0	0.990566	0.938	0.735	0	Neu 2
lasp11	0	0.989133	0.914	0.666	0	Neu 2
ephx21	0	0.986594	0.54	0.301	0	Neu 2
si:dkey-188i13.6	5.44029e-283	0.985826	0.265	0.136	1.08343e-278	Neu 2
junba1	0	0.982336	0.888	0.685	0	Neu 2
si:ch73-343l4.81	0	0.980863	0.641	0.257	0	Neu 2
tmsb11	0	0.979655	0.828	0.531	0	Neu 2
wasa2	0	0.978385	0.662	0.331	0	Neu 2
txnipa1	0	0.977709	0.821	0.569	0	Neu 2
efhd22	0	0.97686	0.813	0.525	0	Neu 2
odc11	0	0.975102	0.69	0.372	0	Neu 2
ENSDARG000001010341	0	0.966672	0.57	0.352	0	Neu 2
card9	0	0.961485	0.631	0.325	0	Neu 2
cebpb1	0	0.960278	0.957	0.821	0	Neu 2
ehd1a1	0	0.958173	0.58	0.335	0	Neu 2
antxr2a1	0	0.952126	0.715	0.419	0	Neu 2
eno1a1	0	0.949871	0.845	0.613	0	Neu 2
tppp1	0	0.949723	0.452	0.273	0	Neu 2
si:dkey-185m8.21	0	0.946795	0.561	0.262	0	Neu 2
glipr1a1	0	0.946747	0.477	0.197	0	Neu 2
si:ch211-105j21.91	0	0.94387	0.602	0.2	0	Neu 2
skap21	0	0.943709	0.784	0.513	0	Neu 2
si:zfos-741a10.31	0	0.943393	0.608	0.339	0	Neu 2
hmgb1a1	0	0.940677	0.714	0.455	0	Neu 2
alas11	0	0.940424	0.743	0.488	0	Neu 2
slc2a3b1	0	0.93981	0.815	0.482	0	Neu 2
sptlc2a1	0	0.930852	0.561	0.259	0	Neu 2
pgk11	0	0.9299	0.768	0.566	0	Neu 2
ip6k2b1	0	0.92405	0.603	0.377	0	Neu 2
glo11	0	0.921612	0.696	0.448	0	Neu 2
si:ch211-201h21.51	0	0.918129	0.407	0.152	0	Neu 2
tktb1	0	0.914679	0.606	0.318	0	Neu 2
itgb21	0	0.91066	0.79	0.516	0	Neu 2
CR848841.11	0	0.904291	0.398	0.1	0	Neu 2
spice11	0	0.903791	0.462	0.173	0	Neu 2
sema4aa1	0	0.894327	0.457	0.179	0	Neu 2
b2m1	0	0.890848	0.98	0.886	0	Neu 2
tnip1	0	0.889651	0.696	0.475	0	Neu 2
ccng2	0	0.888127	0.704	0.485	0	Neu 2
rhof1	0	0.88756	0.459	0.124	0	Neu 2
rac21	0	0.885293	0.948	0.738	0	Neu 2
h1-101	3.6754e-211	0.879942	0.409	0.275	7.31957e-207	Neu 2
si:dkeyp-27c8.21	0	0.878439	0.59	0.402	0	Neu 2
pfn11	0	0.876832	0.998	0.955	0	Neu 2
pim11	0	0.872054	0.794	0.633	0	Neu 2
hck1	0	0.867943	0.677	0.44	0	Neu 2
gpia1	0	0.861145	0.735	0.483	0	Neu 2
lxn1	0	0.857628	0.607	0.399	0	Neu 2
slc6a9	0	0.857195	0.356	0.104	0	Neu 2
si:ch211-243a20.41	0	0.8539	0.58	0.321	0	Neu 2
ets22	0	0.853502	0.73	0.471	0	Neu 2
si:dkey-24p1.71	0	0.851219	0.604	0.345	0	Neu 2
ltb4r1	0	0.849941	0.521	0.228	0	Neu 2
pgp1	0	0.849648	0.533	0.284	0	Neu 2
si:ch211-203d1.31	0	0.846122	0.482	0.214	0	Neu 2
gig2d1	0	0.844975	0.477	0.304	0	Neu 2
cnp1	0	0.841751	0.74	0.513	0	Neu 2
itm2cb1	0	0.840126	0.377	0.151	0	Neu 2
lgals9l31	0	0.836367	0.507	0.329	0	Neu 2
clic11	0	0.836249	0.762	0.524	0	Neu 2
vamp81	0	0.833942	0.599	0.287	0	Neu 2
si:dkey-112a7.41	0	0.831784	0.656	0.454	0	Neu 2
si:rp71-1g18.131	0	0.828855	0.349	0.102	0	Neu 2
dub1	0	0.827568	0.592	0.337	0	Neu 2
si:dkey-192g7.31	0	0.827442	0.534	0.336	0	Neu 2
stat1a1	0	0.824103	0.691	0.479	0	Neu 2
gnai11	0	0.821683	0.806	0.57	0	Neu 2
stx11a1	0	0.821089	0.562	0.328	0	Neu 2
ca61	0	0.820295	0.353	0.108	0	Neu 2
zfand5b1	0	0.813988	0.599	0.423	0	Neu 2
CR318588.41	0	0.808314	0.748	0.712	0	Neu 2
snx10b	0	0.804699	0.398	0.229	0	Neu 2
zgc:162730	0	0.804418	0.88	0.73	0	Neu 2
pygb1	0	0.801925	0.38	0.141	0	Neu 2
si:dkey-117a8.41	0	0.801004	0.267	0.086	0	Neu 2
svild1	0	0.80099	0.408	0.137	0	Neu 2
actb12	0	0.800771	0.993	0.917	0	Neu 2
si:ch73-90p23.11	0	0.799791	0.325	0.089	0	Neu 2
LECT21	1.39648e-299	0.798182	0.35	0.205	2.7811e-295	Neu 2
txn1	0	0.79615	0.825	0.556	0	Neu 2
rhoab1	0	0.796064	0.884	0.687	0	Neu 2
zgc:158868	0	0.794834	0.291	0.044	0	Neu 2
dhx58	0	0.794596	0.272	0.107	0	Neu 2
si:dkey-26c10.5	4.98598e-141	0.791583	0.347	0.258	9.92957e-137	Neu 2
il161	0	0.790978	0.5	0.238	0	Neu 2
add3a1	0	0.788328	0.539	0.325	0	Neu 2
stim1a1	0	0.785439	0.577	0.33	0	Neu 2
dusp21	0	0.783223	0.617	0.426	0	Neu 2
pim2	0	0.779661	0.556	0.308	0	Neu 2
suclg1	0	0.777677	0.797	0.568	0	Neu 2
helz2	0	0.777641	0.28	0.099	0	Neu 2
fam49bb1	0	0.776853	0.571	0.351	0	Neu 2
spi1b2	0	0.774442	0.939	0.742	0	Neu 2
msna1	0	0.773192	0.944	0.785	0	Neu 2
samsn1a1	0	0.771344	0.758	0.5	0	Neu 2
prkcda1	0	0.769678	0.451	0.179	0	Neu 2
CU019662.11	0	0.767634	0.477	0.257	0	Neu 2
tpst11	0	0.766299	0.369	0.1	0	Neu 2
icn1	0	0.762574	0.853	0.685	0	Neu 2
ndufa4	0	0.761395	0.467	0.203	0	Neu 2
cybb1	0	0.759673	0.442	0.21	0	Neu 2
pxk1	0	0.758082	0.503	0.258	0	Neu 2
tpi1b1	0	0.75765	0.914	0.723	0	Neu 2
btg21	0	0.757437	0.792	0.612	0	Neu 2
egr3	0	0.752712	0.324	0.175	0	Neu 2
hsp90aa1.2	3.79524e-246	0.746818	0.308	0.176	7.55821e-242	Neu 2
camk1db1	0	0.746781	0.37	0.109	0	Neu 2
si:dkey-34d22.51	0	0.746106	0.393	0.17	0	Neu 2
si:dkeyp-9d4.2	0	0.74559	0.297	0.118	0	Neu 2
cdkn1bb1	0	0.745588	0.574	0.383	0	Neu 2
CR855337.11	0	0.742556	0.474	0.265	0	Neu 2
coro1a1	0	0.741815	0.947	0.765	0	Neu 2
C7H19orf12.21	0	0.740632	0.265	0.079	0	Neu 2
arpc31	0	0.738116	0.934	0.72	0	Neu 2
gpr841	0	0.735903	0.42	0.237	0	Neu 2
rab11ba1	0	0.732332	0.622	0.391	0	Neu 2
fes1	0	0.731547	0.337	0.121	0	Neu 2
cd1641	0	0.730788	0.504	0.284	0	Neu 2
dhrs91	0	0.727881	0.468	0.232	0	Neu 2
sat1a.11	0	0.725688	0.361	0.108	0	Neu 2
hopx1	0	0.725211	0.572	0.307	0	Neu 2
prdm1b1	0	0.718621	0.278	0.095	0	Neu 2
asah1a1	0	0.715518	0.363	0.156	0	Neu 2
zyx1	0	0.714993	0.494	0.268	0	Neu 2
cnn21	0	0.714865	0.751	0.519	0	Neu 2
plxnc12	0	0.714705	0.726	0.483	0	Neu 2
lyn1	0	0.712437	0.684	0.492	0	Neu 2
itm2bb1	0	0.712255	0.904	0.7	0	Neu 2
lcp11	0	0.711379	0.892	0.65	0	Neu 2
mmp91	0	0.710016	0.669	0.244	0	Neu 2
si:ch211-196l7.4	0	0.708228	0.714	0.561	0	Neu 2
pgam1a	0	0.707736	0.79	0.641	0	Neu 2
h3f3d1	0	0.704617	0.713	0.547	0	Neu 2
larp6a1	0	0.7028	0.523	0.318	0	Neu 2
si:dkey-79d12.51	0	0.702368	0.551	0.354	0	Neu 2
si:ch211-8c17.21	0	0.702172	0.377	0.133	0	Neu 2
gng51	0	0.70213	0.8	0.574	0	Neu 2
gnai2a1	0	0.701081	0.825	0.627	0	Neu 2
myl12.11	0	0.70021	0.938	0.753	0	Neu 2
actr2a1	0	0.698842	0.7	0.488	0	Neu 2
id32	0	0.69848	0.568	0.327	0	Neu 2
mxi1	0	0.697801	0.418	0.214	0	Neu 2
arpc5b2	0	0.697355	0.746	0.532	0	Neu 2
mical11	0	0.696776	0.358	0.115	0	Neu 2
f11r.11	0	0.696583	0.598	0.397	0	Neu 2
rps6kb1b1	0	0.694468	0.411	0.186	0	Neu 2
nfkbiaa	0	0.6935	0.854	0.726	0	Neu 2
sult2st11	0	0.692527	0.434	0.155	0	Neu 2
gbp1	0	0.692348	0.525	0.347	0	Neu 2
cab39l11	0	0.690872	0.591	0.382	0	Neu 2
ifngr11	0	0.68529	0.349	0.105	0	Neu 2
rps6ka11	0	0.68089	0.477	0.249	0	Neu 2
yrk1	0	0.679449	0.557	0.334	0	Neu 2
plpp1a1	0	0.678499	0.463	0.238	0	Neu 2
b2ml1	0	0.678238	0.975	0.859	0	Neu 2
mlx2	0	0.67808	0.455	0.299	0	Neu 2
hcls11	0	0.676459	0.766	0.572	0	Neu 2
mctp2b1	0	0.675114	0.295	0.071	0	Neu 2
pkma1	0	0.67393	0.852	0.667	0	Neu 2
ube2d1b1	0	0.673524	0.597	0.419	0	Neu 2
pde4ba2	0	0.673036	0.69	0.502	0	Neu 2
ostf11	0	0.671805	0.613	0.422	0	Neu 2
tpm11	0	0.671059	0.424	0.201	0	Neu 2
rarga1	0	0.670707	0.568	0.372	0	Neu 2
agtrap1	0	0.670488	0.404	0.202	0	Neu 2
RGS131	0	0.67003	0.334	0.142	0	Neu 2
wu:fj29h111	0	0.667787	0.319	0.157	0	Neu 2
arpc21	0	0.667456	0.953	0.773	0	Neu 2
cmtm71	0	0.666099	0.467	0.24	0	Neu 2
afap1l1b	0	0.665147	0.311	0.131	0	Neu 2
tdh1	0	0.663659	0.566	0.378	0	Neu 2
[truncated: 6,163 more rows]
