# Supplementary material for: Comparative single-cell profiling reveals distinct cardiac resident macrophages essential for zebrafish heart regeneration
Source: eLife. 2023 Jul 27;12:e84679. doi: 10.7554/eLife.84679 (PMC10411971; doi:10.7554/eLife.84679)
Supplement: Figure 3—source data 1. [file elife-84679-fig3-data1.xlsx]

## Sheet: Figure 3B-oligo lists
Gene	Forward Primer	Reverse Primer	Probe length (nt)
hbaa1	ACGCAGCGATGAGTCTCT	CATGCATGAGTTGTTAAGAGTG	500
hmox1a	TCAGAGCATTCGAGTTCAAC	ACAGTTTATTAATCTTGCATTTACACAG	533
timp4.3	CAGACACGAAGGACATGC	CACCGAATGTATGTGTTTATTAAC	502
