# Supplementary material for: Comparative single-cell profiling reveals distinct cardiac resident macrophages essential for zebrafish heart regeneration
Source: eLife. 2023 Jul 27;12:e84679. doi: 10.7554/eLife.84679 (PMC10411971; doi:10.7554/eLife.84679)
Supplement: Figure 4—source data 1. [file elife-84679-fig4-data1.xlsx]

## Sheet: hierarchical heatmap
id	dendrogram_cut	Mac 1	Mac 2	Mac 3	Mac 4	Mac 5	Mac 6	Mac 7	MN	Mac 8	Mac 9	Neu 1	Neu 2
selenow1	6	-25.46	0	-7.02	-37.23	-5.29	-0.77	0	0	0	0	-220.04	-16.6	203.44
si:dkey-102g19.3	6	-0.59	0	0	-4.79	0	-7.47	0	0	0	0	-186.42	-11.8	174.62
hspa8	6	-36.96	27.98	0	-2.12	0	0	0	0	0	0	-237.61	-63.82	173.79
cox6b2	6	-46.24	27.9	-3.95	-64.01	-4.39	-14.45	0	2.33	0	0	-210.72	-37.65	173.07
lect2l	12	-1.84	0	-4.28	-10.3	-8.05	0	-4.12	-65.45	0	0	36.05	203.12	167.07
rplp1	6	-32.78	60.15	0	-0.37	-32.39	-1.2	0	26.36	0	0	-197.04	-42.18	154.86
echdc2	6	-152.14	0	-24.77	-71.1	-13.94	-27.12	0	0	0	0	-229.1	-85.86	143.24
zgc:162944	6	14.78	8.08	0	2.6	0	-0.81	0	0	0	0	-210.1	-71.14	138.96
npsn	12	0	0	0	0	-15.64	-2.02	0	-2.45	0	0	0	137.76	137.76
prdx5	6	0	27.45	0	-5.35	0	0	0	4.55	0	0	-134.13	-0.69	133.44
hsbp1a	6	0	0	0	0	-5.82	-1.56	0	-0.14	0	-0.39	-181.88	-48.83	133.05
cebpb	12	-45.87	79.62	0	0	0	0	0	0	0	0	50.23	173.96	123.73
rps21	6	-62.7	16.03	0	-1.74	-43.08	0	0	1.3	0	0	-215.51	-95.94	119.57
prkcda	6	-0.48	0	0	-3.29	-24.47	-2.47	0	0	0	0	-116.28	0	116.28
tmsb1	5	11.77	77.4	7.09	51.36	-6.36	3.74	7.24	38.78	0	0	-54.88	59.21	114.09
gsr	6	-18.61	0	0	-23.14	-11.5	-0.11	0	-20.9	0	0	-152.62	-39.92	112.7
arpc2	6	0	12.89	0	-12.11	0	0	0	-1.3	0	0	-166.25	-54.1	112.15
rplp2l	5	-29.15	43.78	0	-0.16	-30.97	-0.06	0	34.23	0	0	-126.05	-14.32	111.73
cox7b	6	-137.05	0	-24.59	-136.35	-57.21	-73.45	0	0	0	0	-228.06	-117.06	111
gig2i	6	0	0	0	0	-5.97	0	0	0	0	0	-121.01	-12.74	108.27
si:ch211-15b10.6	6	-60.21	0	0	-11.5	-3.81	-3.52	0	0	0	0	-191.19	-83.75	107.44
flna	6	7.96	3.56	0	0	0	-2.15	0	5.72	0	0	-146.21	-38.91	107.3
bhlhe40	6	-171.3	-27.93	-33.22	-70.31	-58.59	-32.6	-6.03	-23.2	0	0	-249.25	-143.42	105.83
sult5a1	6	0	0	0	-19.43	-7.82	0	0	-14.33	0	0	-129.06	-24.33	104.73
mhc1uka	6	-59.57	-25.83	-1.54	-1.11	-11.23	-1.24	0	0	0	0	-204.95	-100.98	103.97
hmgn2	6	-20.59	0	-9.35	-17.39	0	-17.36	-0.52	0	0	0	-120.94	-18.61	102.33
fcer1gl	6	-104.51	0	-33.92	-35.8	-4.69	0	0	-10.38	0	0	-180.42	-79.1	101.32
g6pd	6	0	0	0	-13.47	-3.01	0	0	0	0	0	-114.29	-13.31	100.98
fabp3	6	-17.48	0	0	-1.41	-0.36	-0.34	0	0	0	0	-119.75	-18.96	100.79
cdc16	6	0	0	0	0	-6.62	0	0	0	0	0	-142.48	-41.9	100.58
uba52	6	-112.85	5.69	-5.65	-20.03	-40.55	0	0	3.98	0	0	-191.56	-91.13	100.43
ctnna1	6	0	0	0	0	0	0	0	0	0	0	-127.6	-27.39	100.21
prdx6	6	0	24.88	-6.49	-27.05	0	-24.15	0	-6.41	0	0	-187.96	-89.15	98.81
prdx1	6	-47.18	-0.04	-7.54	-77.8	-40.53	-34.66	-6.58	-25.39	0	0	-299.14	-202.61	96.53
rps15	5	0	75.61	6.84	14.2	0	5.43	0	35.91	0	0	-103.71	-7.39	96.32
grn2	6	-149.65	48.47	-23.72	-30.57	0	-14.7	-1.69	0	0	0	-61.8	34.21	96.01
mxi1	6	-21.78	0	-3.84	-21.24	-2.06	-1.19	0	-14.56	0	0	-150.56	-54.99	95.57
gyg1a	6	9.71	0	0	0	0	7.89	0	0	0	0	-95.73	-0.21	95.52
rpl34	5	-17.4	28.81	0.7	0	0	4	0	35	0	0	-101.22	-9.26	91.96
b2m	6	-104.18	1.63	-13.79	-1.29	-9.2	-8.87	0	0	0	0	-243.9	-152.16	91.74
rps2	5	0	185	7.75	52.86	10.02	40.39	12.58	46.24	0	5.5	24.46	114.98	90.52
susd1	6	0	0	0	-21.75	-26.62	-8.05	0	0	0	0	-98.43	-8.5	89.93
sucla2	6	-3.22	0	-1.46	-40.16	-7.92	-4.97	0	0	0	0	-164.16	-74.37	89.79
sult6b1	6	0	0	1.88	0	0	0	0	0	0	0	-89.55	0	89.55
BX120005.2	6	-27.42	-34.4	0	-2.47	0	0	0	-17.13	0	0	-157.03	-67.61	89.42
BX908782.2	6	-37.42	-2.03	-16.54	-40.63	-7.77	-17.18	-5.63	-63.88	0	0	-82.97	6.35	89.32
gig2h	6	0	0	0	0	-9.19	0	0	0	0	0	-101.01	-11.91	89.1
ssr3	6	-16.58	19.37	0	0	0	-2.71	0	2.11	0	0	-110.77	-22.54	88.23
psme1	6	-8.08	0	0	-5.22	-14.67	-9.08	0	0	0	0	-108.22	-20.19	88.03
rps25	5	-16.11	42.29	5.54	0	-13.02	0	0	32.77	0	0	-93.9	-6.71	87.19
si:dkey-97a13.6	6	-6.99	0	-3.25	-7.9	-4.89	-3.76	0	0	0	0	-130.64	-43.45	87.19
si:dkeyp-1h4.6	6	0	0	0	0	0	0	0	4.33	0	0	-149.37	-62.96	86.41
psma2	6	-1.74	3.98	0	0	-7.36	-9.45	0	0	0	0	-140.88	-54.75	86.13
spaca4l	6	0	0	0	0	0	0	0	0	0	0	-86.09	0	86.09
sec61g	6	-61.08	34.02	0	0	-4.94	0	0	3.42	0	0	-95.45	-9.54	85.91
irf7	6	0	0	0	0	-14.23	-6.46	0	17.59	-0.57	0	-130.18	-46.05	84.13
mid1ip1l	6	-5.25	18.34	0	-24.69	-12.06	0	0	0	0	0	-95.69	-11.98	83.71
slc25a3b	6	-53.59	12.62	-1.04	-27.97	-4.4	-9.07	0	0	0	0	-169.13	-85.84	83.29
smdt1b	6	0	0	0	-5.84	0	-0.63	0	0	0	0	-106.77	-24.57	82.2
irf1b	6	0	0	0	0	-6.81	0	0	0	0	0	-97.16	-16.1	81.06
snap23.2	6	-25.67	0	-4.75	-2.57	-6.82	0	0	0	0	0	-165.86	-86.28	79.58
prkaa1	6	0	0	0	-5.08	0	0	0	0	0	0	-103.18	-23.72	79.46
mapk12b	6	0	0	0	-8.88	-6.79	0	0	0	0	0	-99.57	-20.38	79.19
wu:fj29h11	6	-39.22	0	-4.17	-17.55	-14.82	-11.02	0	0	0	0	-280.49	-201.56	78.93
gbp1	6	-9.29	0	0	0	0	-0.85	0	0	0	0	-119.47	-40.92	78.55
si:dkey-79f11.10	6	0	0	0	0	-5.2	0	0	4.83	0	0	-117.16	-38.66	78.5
capns1a	6	-5.67	0.51	0	-2.77	0	-1.88	0	0	0	0	-103.59	-25.47	78.12
actb2	11	255.71	267.83	27.05	44.32	7.51	39.06	55.02	55.26	0	0	0	77.55	77.55
ncf1	6	-31.1	-1.09	0	-8.2	-7.81	0	0	-9.25	0	0	-99.01	-21.85	77.16
tcnbb	12	23.39	20.24	6.01	0	-1.49	3.01	0	-10.15	0	0	95.93	172.96	77.03
hyal6	6	0	0	0	0	0	0	0	0	0	0	-76.01	0	76.01
rplp0	5	0	141.41	16.31	17	0	4.01	11.68	63.88	0	0	-75.33	0.63	75.96
psmb8a	6	-41.26	0	-1.44	-0.75	-25.52	-12.43	0	0	0	0	-113.17	-37.49	75.68
rps12	6	0	33.85	10.81	1.58	0	0	0	38.97	0	0	-75.75	-0.14	75.61
hpgd	6	0	0	0	0	0	0	0	-11.41	0	0	-88.95	-13.5	75.45
cst14b.2	6	0	0	0	0	0	0	0	0	0	0	-75.07	0	75.07
stat1b	6	-15.58	0	0	-2.12	-12.63	-6.32	0	6.15	-1.52	-0.87	-227.18	-152.32	74.86
rpl22	6	-116.91	45.29	0	0	-7.53	0.2	0	2.76	0	0	-87.46	-12.75	74.71
gramd1c	6	-5.92	0	0	-6.99	-1.21	-10.4	0	0	0	0	-92.54	-18.88	73.66
nr4a1	6	0	24.17	0	1.66	0	0	0	2.21	0	0	-83.06	-9.62	73.44
rpl39	5	-11.88	82.74	6.22	0	-8.4	0	0.21	38.45	0	0	-89.95	-16.75	73.2
psme2	6	-4.06	0	0	0	-11.05	-9.92	0	0	0	0	-113.58	-40.68	72.9
uqcrb	6	-146.36	6.58	-25.01	-93.22	-59.39	-38.26	0	0	0	0	-189.39	-117.13	72.26
card9	6	-76.06	0	-14.44	-17.3	-0.87	-6.32	0	0	0	0	-117.29	-45.47	71.82
psmb13a	6	-48.23	0	-3.36	0	-4.48	0	0	0	0	0	-100.71	-28.96	71.75
arpc3	6	0	26.07	0	-8.72	0	-12.44	0	0	0	0	-110.06	-38.52	71.54
abracl	6	0	2.1	-4.32	-21.72	-1.17	-3.57	0	-2.7	0	0	-83.62	-13.01	70.61
pycard	6	-3.47	16.1	0	0	0	0	0	8.5	0	0	-80.05	-9.59	70.46
pdia3	6	0.39	2.6	0	0	0	-3.68	0	23.85	0	0	-70.25	0	70.25
si:dkey-19b23.14	6	0	0	0	-35.42	-33.4	-14.05	0	-17.07	0	0	-128.45	-58.67	69.78
hist2h2l	6	8.54	0	0	0	0	0	0	4.86	0	0	-63.49	5.7	69.19
tsc22d3	6	0	0	0	0	0	0	0	1.43	0	0	-102.42	-33.24	69.18
TSC22D3	6	0	0	0	0	0	0	0	1.43	0	0	-102.42	-33.24	69.18
FO744833.2	6	0	0	0	0	-4.03	-3.19	0	0	0	0	-160.47	-91.31	69.16
g0s2	12	110.27	34.51	0	0	25.84	13.37	0	0	0	0	0	68.37	68.37
rps29	6	-45.89	24.24	0	-8.09	-26.94	0	0	2.23	-0.63	0	-122.62	-54.37	68.25
serpinb1l3	6	27.3	7.4	0	1.12	0	0	0	0	0	0	-73.33	-5.1	68.23
RPL37A	5	-11.62	99.1	10.42	0	-5.34	0	1.55	29.9	0	0	-77.43	-9.51	67.92
anxa3b	5	0	40.51	11.28	11.31	10.63	4.62	2.33	28.11	0	0	-67.87	0	67.87
mrtfab	6	0	0	0	0	-3.37	0	0	0	0	0	-67.47	0	67.47
gatc	6	-1.49	0	0	-1.98	0	0	0	0	0	0	-81.65	-14.94	66.71
pmaip1	6	-92.1	33.55	-0.76	-1.54	0	0	0	0	0	0	-149.46	-83.41	66.05
rpl30	5	-22.38	48.15	0	0	-1.16	3.22	0	16.39	0	0	-87.23	-21.24	65.99
acss2	6	0	0	0	-16.19	-3.56	-3.48	0	0	0	0	-94.88	-29.1	65.78
rpl31	5	-23.74	37.83	2.43	0	-6.52	0	0	20.15	0	0	-89.13	-23.59	65.54
rps17	5	0	58.06	13.52	11.33	0	6.52	1.97	53.97	0	0	-79.99	-14.48	65.51
RPS17	5	0	58.06	13.52	11.33	0	6.52	1.97	53.97	0	0	-79.99	-14.48	65.51
capza1a	6	0	0	0	0	0	0	0	0	0	0	-85.67	-20.32	65.35
si:ch73-343l4.2	6	-12.49	0	0	0	0	0	0	0.54	0	0	-76.45	-11.25	65.2
rpl28	5	-53.19	73.62	0	0	-10.5	0	0	18.09	0	0	-109.38	-44.5	64.88
rack1	5	0	73.96	19.56	38.76	8.47	23.68	7.29	67.33	0	0	-64.82	0	64.82
sarnp	6	-20.87	8.69	0	-0.82	-8.87	0	0	0	0	0	-89.95	-25.18	64.77
calr3a	6	3.22	0	0	0	-0.61	0	0	4.15	0	-1.35	-64.76	0	64.76
usf1l	6	0	0	0	0	0	0	0	0	0	0	-88.73	-23.98	64.75
cited4b	6	6.31	11.88	3.36	9.51	0	1.21	0	0	0	0	-77.6	-13.52	64.08
tomm7	6	-5.14	7.45	0	-19.95	-16.27	-12.05	0	0	0	0	-122.18	-58.53	63.65
sms	6	0	0	0	0	-12.03	0	0	0	0	0	-68.47	-4.9	63.57
dbi	6	0	7.96	0	-7.51	0	-7.84	0	0	0	0	-70.17	-6.61	63.56
zgc:153867	11	85.34	17.09	0	0	0	-2.27	0	0	0	0	-74.15	-10.74	63.41
hmgn6	6	0	4.95	0	0	0	0	0	14.45	0	0	-66.25	-3.32	62.93
psmb12	6	-35.96	4.21	0	0	-5.34	-2.43	0	0.98	0	0	-91.52	-28.76	62.76
sec61b	6	0	2.25	0	9.16	0	0	0	8.63	0	0	-67.08	-5.11	61.97
TPPP	6	-137.41	6.99	-22.09	-50.92	-5.5	-40.32	-1.86	0	0	0	-118	-56.25	61.75
tppp	6	-137.41	6.99	-22.09	-50.92	-5.5	-40.32	-1.86	0	0	0	-118	-56.25	61.75
mff	6	-0.32	0	0	-7.25	-1.42	0	0	0	0	0	-96.98	-35.26	61.72
MFF	6	-0.32	0	0	-7.25	-1.42	0	0	0	0	0	-96.98	-35.26	61.72
zgc:174863	6	0	8.57	0.27	0	0	0	0	0	0	0	-76.19	-14.72	61.47
CU469577.1	6	-8.42	0	-0.6	-4.47	-1.56	-1.19	0	0	0	0	-61.31	0	61.31
tapbp.1	6	0	0	0	0	-1.75	0	0	6.06	0	0	-86.22	-24.91	61.31
ca6	12	0	0	0	0	-9.45	0	0	0	0	0	24.83	85.61	60.78
hsbp1b	6	-6.26	0	0	-3.64	0	-3.17	0	0	0	0	-74.95	-14.28	60.67
arl2	6	17.56	0	0	0	0	0	0	0	0	0	-66.92	-6.43	60.49
spink2.2	6	0	0	0	0	0	0	0	-7.35	0	0	-60.39	0	60.39
si:ch73-27e22.8	6	0	0	0	-0.7	0	-0.14	0	0	0	0	-74.12	-13.95	60.17
cox6a1	6	-52.91	2.22	-5.92	-75.68	-11.01	-44.7	0	0	0	0	-145.39	-85.31	60.08
gapdhs	6	0	21.33	-2.21	-15.17	0	-14.37	-1.14	0	0	0	-89.04	-29	60.04
lyz	5	0	87.8	0	0	-8.45	0	-0.6	0	0	0	0	59.99	59.99
ccng2	6	-108.01	-3.49	-2.58	-4.88	0	0	0	-13.61	0	0	-63.17	-3.34	59.83
lsm4	6	-12.39	0	0	-17.29	-5.53	-3.91	0	0	0	0	-81.95	-22.19	59.76
march7.2	6	-4.66	0	0	-2.29	0	0	0	0	0	0	-73.07	-13.49	59.58
ndufb6	6	-18.36	0	0	-26.72	-3.02	-17	0	0	0	0	-106.03	-46.76	59.27
pla2g15	6	-38.51	0	0	-23.77	-0.28	-1.5	0	-11.64	0	0	-85.15	-26.19	58.96
cox8a	6	-34.39	7.45	-3.53	-68.99	-15.83	-32.86	0	-6.47	0	0	-101.1	-42.29	58.81
tspo	6	-10.88	0	-0.09	-15.72	-5.55	0	0	0	0	0	-69.17	-10.63	58.54
pgd	6	-48.63	0	-4.49	-44.16	-20.92	-27	0	-27.88	0	0	-77.11	-18.89	58.22
dennd3b	6	0	0	0	0	0	0	0	0	0	0	-55.68	2.48	58.16
pim2	6	-35.13	0	-2.63	-20.11	-30.49	-6.21	0	-5.62	0	0	-85.73	-27.73	58
anxa4	6	-50.26	29.03	0	0	0	0	0.6	0	0	0	-76	-18.3	57.7
si:cabz01101003.1	6	0	0	0	-2.67	0	0	0	0	0	0	-103.82	-46.28	57.54
sec61a1l	6	0	0	0	-0.93	-3.47	-4.01	0	0	0	0	-130.82	-73.42	57.4
vdac2	6	0	34.03	0	-11	0	0	0	15.32	0	0	-79.83	-22.48	57.35
rpl35a	5	-7.58	60.25	6.44	1.51	-3.93	0	0	37.86	0	0	-89.97	-32.84	57.13
serpinb1l1	6	0	5.63	0	0.8	0	0	0	3.24	0	0	-59.32	-2.36	56.96
CABZ01073795.1	6	0	0	0	0	-3.28	-0.88	0	13.8	-1.99	0	-97.64	-40.93	56.71
si:dkey-117a8.4	6	0	0	0	-2.23	-3.94	0	0	0	0	0	-75.84	-19.35	56.49
dldh	6	0	0	0	-0.46	-1.68	0	0	0.25	0	0	-62.25	-5.84	56.41
histh1l	6	0	0	0	-0.7	0	0	0	0	0	0	-109.79	-53.85	55.94
krtcap2	6	0	8.24	0	0	0	-1.76	0	4.66	0	0	-55.85	0	55.85
calr3b	6	7.05	0	0	0	-4.29	-9.64	0	0	0	-0.42	-55.74	0.08	55.82
icn	5	98.21	162.67	53.92	99.3	65.37	16.24	13	13.35	0.52	0	26.21	81.86	55.65
rpl37.1	5	-30.7	48.48	0	0	-13.51	0	0	22.99	0	0	-106.89	-51.54	55.35
spi1b	12	-14.34	0	1.87	1.9	3.34	13.07	0	-44.67	0	0	70.26	125.57	55.31
tktb	6	-2.14	0	0	-24.37	-24.52	-0.36	0	-2.43	0	0	-57.79	-2.83	54.96
rasgef1ba	6	-71.88	0	0	-2.28	0	0	0	-0.03	0	0	-63.45	-9.26	54.19
fbxo7	6	-29.46	0	-1.01	-3.94	0	-0.08	0	0	0	0	-93.33	-39.35	53.98
psma6l	6	-1.65	0	0	0	-5.57	0	0	0	0	0	-71.27	-17.51	53.76
il1b	6	-90.31	-2.06	-13.77	-41.69	-24.97	-20.06	-0.23	-4.12	0	0	-97.37	-43.7	53.67
afap1l1b	6	0	0	0	0	0	-1.22	0	0	0	0	-98.75	-45.11	53.64
wasb	12	0	9.48	5.73	6.45	0	15.88	0.83	2.86	0	0	27.08	80.69	53.61
epsti1	6	0	0	0	0	0	0	0	0	0	0	-179.13	-126	53.13
si:ch211-245h14.1	6	0	0	0	0	-3.8	-2.12	0	0	0	0	-122.64	-70.09	52.55
ifi35	6	0	0	0	0	-0.92	-2.42	0	-0.52	0	0	-115.36	-62.87	52.49
abcb9	6	0	0	0	0	-15.05	0	0	0	0	0	-52.33	0	52.33
abhd2a	6	0	0	0	-3.22	-6.59	0	0	-0.99	0	0	-73	-20.92	52.08
tdh	6	-7.57	17.71	3.38	0	-8.8	2.07	1.04	0	0	0	-68.36	-16.31	52.05
rps24	5	0	92.8	11	8.95	0	1.33	1.31	46.22	0	0	-57.73	-5.71	52.02
dhx58	6	-6.53	0	0	-12.28	-6.01	-1.41	0	0	-0.8	0	-217.12	-165.31	51.81
ndufb8	6	-20.63	8.97	-2	-25.17	0	-10.69	0	0	0	0	-66.53	-14.95	51.58
ndufa4l	6	-32.03	17.13	-6.22	-41.55	0	-12.88	0	1.8	0	0	-63.84	-12.8	51.04
adam19b	6	0	0	0	-21.56	-30.54	-28.95	0	-17.7	0	0	-154.14	-103.15	50.99
tmem258	6	-22.11	10.82	0	-12.87	-6.69	-22.53	0	0.69	0	0	-59.66	-8.85	50.81
ccng1	6	-11.56	10.55	0	-2.24	0	0	0	0	0	0	-57.05	-6.47	50.58
fxr1	6	0	0	0	0	0	-1.03	0	0	0	0	-75.1	-24.76	50.34
ssu72	6	0	0	0	0	0	0	0	0	0	0	-69.15	-18.93	50.22
fgfr1op2	6	0	0	0	0	0	0	0	0	0	0	-56.37	-6.15	50.22
cdaa	6	-0.21	0	0	-3.95	-1.81	-5.93	0	-24.78	0	0	-158.09	-108.24	49.85
calr	6	0	0	0	-7	-7.6	-8.98	0	0	0	0	-49.68	0	49.68
rabgap1	6	0	0	0	0	0	0	0	0	0	0	-64.7	-15.21	49.49
mrpl47	6	0	0	0	-13.33	-5.27	-3.4	0	0	0	0	-66.76	-17.28	49.48
pfkfb4b	6	-17.91	0	-1.63	-21.55	-2.72	-7.58	0	0	0	0	-83.35	-34.04	49.31
si:ch211-223l2.4	6	0	0	0	-41.86	-9.61	-9.98	0	-9.66	0	0	-86.43	-37.3	49.13
trappc2l	6	-5.55	0	0	-5.56	-3.12	-2.29	0	-5.33	0	0	-73.02	-23.92	49.1
rpl36a	5	-16.29	66.26	5.92	0	-7.54	0	0	38.14	0	0	-58.73	-9.67	49.06
pdhb	6	-2.45	0	0	-26.6	-11.07	-2.65	0	0	0	0	-89.17	-40.2	48.97
cst14b.1	6	-4.14	0	0	-3.73	0	0	0	0	0	0	-83.59	-34.66	48.93
rpl22l1	6	7.29	24.51	12.81	13.79	0	4.34	1.64	31.35	0	0	-48.93	0	48.93
tpst1l	6	0	0	0	0	0	0	0	0	0	0	-48.86	0	48.86
DHDH	6	0	0	0	0	0	0	0	0	0	0	-65.25	-16.56	48.69
march5l	6	0	0	0	0	0	0	0	0	0	0	-71.01	-22.39	48.62
cyb5r1	6	0	0	0	0	0	0	0	0	0	0	-48.33	0	48.33
gmds	6	8.54	0	0	0	0	0	0	0	0	0	-70.33	-22.06	48.27
selp	6	0	0	0	-6.63	-8.45	0	0	0	0	0	-47.04	1.06	48.1
unc50	6	0	0	0	0	0	0	0	0	0	0	-56.74	-8.64	48.1
rpl35	5	0	99.71	9.79	16.43	0	11.97	2.79	46.7	0	0	-48.45	-0.43	48.02
irf9	6	6.23	0	0	0	0	0	0	0	0	0	-63.68	-15.84	47.84
ATP11B	6	0	0	0	0	-0.05	-2.06	0	0	0	0	-79.65	-31.88	47.77
cox7a2l	6	-13.58	3.43	0	-13.73	0	0	0	0	0	0	-63.93	-16.26	47.67
psmb9a	6	-21.36	0	0	0	-6.08	0	0	0.38	0	0	-88.23	-40.65	47.58
cyba	6	-58.22	3.86	-4.34	-30.68	-11.65	-4.52	0	-8.03	0	0	-162.99	-115.51	47.48
txndc17	6	0	0	0	-6.57	0	-1.04	0	0	0	0	-98.09	-50.67	47.42
eef1g	4	18.67	0	17.76	58.71	2.43	27.22	7.42	59.2	0	0	-13.74	33.13	46.87
rps26l	6	0	6.1	10.5	4.2	-0.49	0	0	28.31	0	0	-67.81	-21	46.81
ndufb4	6	0	3.9	0	-16.27	-6.97	-12.29	0	0	0	0	-63.16	-16.73	46.43
ifit8	6	0	0	0	0	-17.35	0	0	0	0	0	-163.25	-117.09	46.16
itm2cb	6	0	0	0	0	0	0	0	0	0	0	-47.83	-2.17	45.66
zgc:175264	6	0	0	0	-6.77	-7.78	0	0	0	0	0	-55.93	-10.58	45.35
atp5mc3b	5	-15.83	42.74	0	-30.25	-1.22	-7.1	0	24.76	0	0	-63.05	-17.95	45.1
rpl14	6	-57.23	17.47	0	0	-22.53	0	0	9.86	-1.11	0	-68.42	-23.44	44.98
hbp1	6	-25.49	0	-1.31	-9.85	0	0	0	0	0	0	-61.23	-16.32	44.91
gapdh	12	0	6.9	0	0	-4.8	0	0	-6.75	0	0	0	44.82	44.82
gtf2h5	6	0	0	0	-5.07	0	-0.11	0	0	0	0	-76.01	-31.2	44.81
ch25hl2	12	0	0	0	0	0	0	0	0	0	0	10.32	54.97	44.65
scpp8	12	0	-2.85	0	0	-3.68	0	0	-7.12	0	0	107.02	151.62	44.6
nrbp2a	6	0	0	0	0	0	0	0	0	0	0	-56.22	-11.68	44.54
psmb4	6	-7.87	1.26	0	-12.36	-16.39	-14.12	0	0	0	0	-94.92	-50.54	44.38
wee2	6	0	0	0	0.03	0	0.01	0.27	6.67	0	0	-45.43	-1.08	44.35
jun	6	-36.08	4.58	-1.52	-20.96	-6.95	-14	0	0	0	0	-95.58	-51.73	43.85
klf2b	6	0	0	0	-10.99	-5.11	0	0	0	0	0	-47.52	-3.85	43.67
rps20	9	25.4	-40.3	15.16	21.06	8.92	25.56	0	0	0	0	21.95	65.53	43.58
psmb2	6	0	6	0	0	0	-2.05	0	0	0	0	-65.47	-21.9	43.57
dctn5	6	0	0	0	-0.99	0	-1.59	0	0	0	0	-54.85	-11.34	43.51
sdhaf4	6	-3.79	0	-0.71	-15.02	-7.77	-6.97	0	0	0	0	-108.77	-65.3	43.47
parvg	6	13.9	13.21	5.31	3.14	0	4.63	0	0	0	0	-43.31	0	43.31
atp5fa1	6	-23.97	12.47	-0.28	-49.09	-12.31	-28.89	0	0.55	0	0	-77.94	-34.63	43.31
ost4	6	-20.29	0	0	-29.48	-19.17	-9.44	0	0	0	0	-71.58	-28.37	43.21
gtf2f2a	6	-0.68	0	0	-1.77	-7.44	-0.09	0	0	0	0	-45.98	-2.86	43.12
atg13	6	-2.23	0	0	-5.98	0	0	0	0	0	0	-59.76	-16.75	43.01
ncf4	6	-24.46	0	0	-7.11	-1.16	0	0	-36.36	0	0	-58.53	-15.61	42.92
sec61a1	5	0	31.57	0	0	0	1.26	0.77	23.23	0	0	-42.76	0	42.76
pleca	6	0	0	0	0.66	18.37	1.34	0	3.16	0	0	-42.66	0	42.66
rnf114	6	0	0	0	0	0	0	0	0	0	0	-54.66	-12.08	42.58
ubxn1	6	0	0	0	0	0	0	0	0	0	0	-68.67	-26.09	42.58
rps15a	5	0	137.19	10.23	7.71	0	0	3.79	45.06	0	0	-52.28	-9.71	42.57
dap	6	0	0	0	-1.47	0	0	0	0	0	0	-46.74	-4.34	42.4
atp5pd	6	-58.06	3.57	-10.05	-67.88	-15.76	-34.48	0	0	0	0	-73.17	-30.97	42.2
rps26	5	-11.36	53.48	7.61	0.89	-1.99	0	0	34.99	0	0	-45.11	-2.91	42.2
ndufs6	6	-31.18	0	-4.38	-33.5	-12.2	-27.47	0	0	0	-0.28	-87.51	-45.63	41.88
ppiab	5	-26.65	82.2	0	0	0	0	0	36.37	0	0	-41.83	0	41.83
gpx1a	5	-0.1	62.2	8.83	0	0.28	0	4.39	29.82	0	0	0	41.71	41.71
il6r	12	0	0	0	-3.35	-8	0	0	0	0	0	0	41.71	41.71
lgals3a	6	3.17	0	0	0	0	0	0	0	0	0	-51.63	-9.92	41.71
rap1gap2b	6	0	0	0	0	0	0	0	0	0	0	-41.6	0	41.6
ndufv2	6	-14.56	0	0	-15.5	-7.78	-7.24	0	0	0	0	-58.49	-16.91	41.58
rasal3	6	0	0	0	-1.02	-22.68	0	0	0	0	0	-45.23	-3.87	41.36
zgc:77650	6	-16.17	17.27	0	0	-1.62	0	0	0	0	0	-74.05	-32.77	41.28
atp5f1e	6	-137.82	0.35	-16.2	-116.13	-61.74	-53.32	0	0	0	0	-138.65	-97.39	41.26
diablob	6	-11.4	0	0	-18.8	-1.45	-0.37	0	0	0	0	-69.28	-28.04	41.24
naga	6	0	14.97	0	1.4	13.03	0	1.55	8.5	0	0	-41.21	0	41.21
usf3	6	0	0	0	0	-4.83	0	0	0	0	0	-60.5	-19.43	41.07
id2a	6	0	14.88	0	0	0	0	0	-0.21	0	0	-90.48	-49.51	40.97
josd2	6	0	0	0	0	0	-3.11	0	0	0	0	-44.06	-3.1	40.96
COX5B	5	-39.46	93.14	-2.31	-20.46	-4.61	-12.26	0	6.25	0	0	-67.2	-26.27	40.93
dynlrb1	6	-47.84	0	-1.19	-25.67	-5.86	-13.76	0	0	0	0	-54.3	-13.38	40.92
mdh1aa	6	-65.89	3.67	-0.53	-12.88	-3.12	0	0	5.46	0	0	-54.97	-14.06	40.91
emc10	6	0	0	0	-4.21	0	-1.11	0	0	0	0	-51.96	-11.12	40.84
rbck1	6	0	0	0	0	0	0	0	0	0	0	-71.4	-30.62	40.78
dhrs9	6	0	0	0	-4.18	0	0	0	0	0	0	-40.75	0	40.75
si:ch73-233k15.2	6	0	0	0	0	0	0	0	-0.27	0	0	-56.89	-16.14	40.75
cyfip2	6	0	0	0	0	-28.47	0	0	-14.13	0	0	-59.76	-19.2	40.56
h3f3a	5	-18.89	67.75	0	-5.73	-4.81	-0.28	0	0	0	0	-68.49	-27.99	40.5
trappc1	6	0	0	0	0	0	0	0	0	0	0	-65.84	-25.43	40.41
rabac1	6	-10.87	0	-1.45	-12.45	0	-3.68	0	0	0	0	-67.94	-27.54	40.4
b4galnt1a	6	0	0	0	-10.32	-2.06	0	0	-2	0	0	-69.84	-29.52	40.32
zgc:56525	6	0	0	0	-11.15	0	-2.04	0	0	0	0	-58.29	-18.08	40.21
mrps30	6	0	0	0	-1.16	0	0	0	0	0	0	-39.65	0.54	40.19
psma6a	6	0	0	0	-8.22	-1.03	-7.6	0	0	0	0	-62.68	-22.74	39.94
atp5f1b	6	-50.85	10.86	-13.83	-110.15	-25.76	-49.22	0	0	0	0	-86.53	-46.63	39.9
gadd45aa	6	-25.99	0	0	-34.64	-16.31	-10.5	0	-8.98	0	0	-43.53	-3.64	39.89
acot7	6	0	0	0	-7.13	-4.06	-0.96	0	0	0	0	-72.74	-32.94	39.8
chia.6.1	6	0	0	0	-54.25	0	0	0	-20.54	0	0	-70.9	-31.2	39.7
psmd14	6	0	0	0	-9.19	-2.05	-13.1	0	0	0	0	-79.89	-40.27	39.62
zmat2	6	0	0	0	0	0	0	0	0	0	0	-53.82	-14.28	39.54
ppdpfa	12	0	0	0	-10.91	-15.94	0	0	0	0	0	0	39.5	39.5
pfdn1	6	-12.29	0	-2.51	-6.34	0	-7.55	0	0	0	0	-85.39	-45.98	39.41
si:ch211-91p5.3	6	-2.28	0	0	-0.34	-0.64	0	0	0	0	0	-84.87	-45.47	39.4
psmb6	6	0	0	0	-8.81	0	-5.31	0	0	0	0	-61.74	-22.42	39.32
slc38a2	6	-8.57	0	0	0	-4.44	0	0	0	0	0	-58.6	-19.31	39.29
ifi30	5	0	19.55	0	22.57	10.37	15.19	1.42	50.66	0	0	-39.26	0	39.26
si:ch73-362m14.2	6	0	0	0	0	0	0	0	0	0	0	-39.25	0	39.25
hdac9b	6	5.31	-0.09	3.53	0	0	0	0	0	0	0	-64.14	-25.09	39.05
BX649411.1	6	0	0	0	-3.1	-6.97	-0.39	0	0	0	0	-39.56	-0.53	39.03
cops9	6	-9.81	0	0	-8.64	-4.52	-3.9	0	0	0	0	-55.33	-16.36	38.97
gabarapl2	6	0	0	0	0	0	0	0	0	0	0	-71.64	-32.74	38.9
rnaseka	6	-130.52	0	-31.3	-89.52	0	-21.86	0	-47.11	0	0	-198	-159.14	38.86
ndufs3	6	-1.61	0	0	-12.93	-2.42	-4.9	0	0	0	0	-55.15	-16.34	38.81
dnmt1	6	0	0	0	-7.25	-1.5	0	0	0	0	0	-90.62	-51.85	38.77
got2b	6	-6.36	0	-0.53	-15.35	-6.84	-11.13	0	0	0	0	-88.03	-49.26	38.77
thg1l	6	0	0	0	0	0	0	0	0	0	0	-38.75	0	38.75
klf3	6	0	0	0	0	0	0	0	0	0	0	-38.63	0	38.63
clta	6	0	0	0	0	0	0	0	0	0	0	-59.55	-20.97	38.58
actr1	6	0	0	0	0	0	0	0	0	0	0	-34.42	4.13	38.55
tspan37	6	0	0	-0.13	0	0	0	0	0	0	0	-47.88	-9.33	38.55
mmp13a.1	12	0	0	-0.3	-6.35	-11.68	0	0	-6.43	0	0	-16.77	21.72	38.49
ndufb11	6	-20.7	0	-0.05	-27.26	-10.79	-12.43	0	0	0	0	-61.64	-23.2	38.44
gpia	6	13.32	1.54	0	0	-4.26	-4.1	0	0	0	0	-38.5	-0.12	38.38
CR383676.1	9	-16.75	-120.24	0	0	-0.57	0	0	0	0	0	-63.75	-25.4	38.35
cyb5r3	6	0	0	0	-1.33	0	-3.28	0	0	0	0	-42.39	-4.04	38.35
nudcd3	6	-5.42	0	0	0	0	0	0	0	0	0	-45.92	-7.61	38.31
tsr3	6	-5.07	0	0	0	0	0	0	-1.74	0	0	-42.32	-4.04	38.28
si:dkey-34d22.5	6	0	0	0	0	0	-1.1	0	0	0	0	-56.99	-18.93	38.06
atp6ap1b	6	-43.92	-0.75	-6.39	-25.3	0	0	0	-25.74	0	0	-56.05	-18	38.05
kdm2ba	6	-3.33	0	0	0	0	0	0	0	0	0	-38.05	0	38.05
badb	6	0	0	0	0	-1.49	0	0	0	0	0	-48.06	-10.09	37.97
si:ch211-214p16.1	9	0	-60.75	0	0	-19.37	-2.38	0	-2.66	0	0	-37.94	0	37.94
lgals17	6	-18.97	0	0	-17.9	-18.97	-9.16	0	2.79	-0.33	0	-272.77	-234.83	37.94
bdh1	6	0	0	0	0	-5.18	0	0	0	0	0	-36.68	1.05	37.73
xaf1	6	0	0.62	0	0	0	2.8	0.89	9.39	0	0	-204.84	-167.11	37.73
commd2	6	0	0	0	0	0	0	0	0	0	0	-48.91	-11.2	37.71
zeb2a	6	-7.45	0	0	0	0	0	0	-8.99	0	0	-54.7	-17.05	37.65
zgc:152863	6	0	0	0	0	-2.31	-0.85	0	0	0	0	-37.63	-0.01	37.62
rpl27	5	-3.16	56.75	4.5	3.42	0	0	0	36.15	-0.56	0	-38.78	-1.19	37.59
ndufa3	6	-49.76	0	-1.3	-31.48	-22.6	-21.94	0	0	0	0	-56.52	-18.95	37.57
rabgap1l	6	-16.95	0	0	-21.71	-1.71	-2.03	0	-16.9	0	0	-51.89	-14.43	37.46
aimp2	6	0	0	0	0	0	0	0	2.2	0	0	-44.61	-7.16	37.45
psmf1	6	-6.54	0	0	-5.5	-12.5	-4.59	0	0.54	0	0	-190.38	-153	37.38
ube4b	6	-5.3	0	0	-0.58	0	0	0	0	0	0	-44.63	-7.3	37.33
atp5l	6	-88.33	13.57	-7.02	-91.04	-28.09	-39.24	0	0	0	0	-103.17	-65.84	37.33
si:ch73-27e22.1	6	0	0	0	0	-0.72	0	0	0	0	0	-49.23	-11.9	37.33
mkrn4	6	0	0	0	0	0	0	0	0	0	0	-37.23	0	37.23
psmc2	6	0	0	0	-0.71	0	-3.94	0	0	0	0	-57.51	-20.4	37.11
ftr67	6	-18.89	0	0	-11.55	-0.1	0	0	0	0	0	-52.33	-15.33	37
hpse	6	-40.22	0	-4.22	-24.09	-12.51	-8.79	0	0	0	0	-54.98	-18.07	36.91
atp10d	6	-27.5	0	-0.23	-14.08	-2.67	0	0	-7.44	0	0	-45.78	-8.94	36.84
spns3	6	-8.14	0	0	-19.7	-9.45	-0.73	0	0	0	0	-71.58	-34.76	36.82
pold1	6	0	0	0	0	-0.43	0	0	0	0	0	-40.25	-3.48	36.77
syngr2a	6	-32.6	0	0	-18.94	-3.95	0	0	-5.41	0	0	-64.4	-27.82	36.58
edem1	6	0	0	0	0	0	0	0	0	0	0	-48.31	-11.77	36.54
CABZ01115113.1	6	0	0	0	-3.31	-4.8	-4.98	0	0	0	0	-61.68	-25.15	36.53
ndufa11	6	-11.62	0	-1.79	-16.38	-4.23	-10.59	0	0	0	0	-51.45	-14.96	36.49
ddost	6	0	0	0	-2.27	-1.47	-8.12	0	0	0	0	-44.61	-8.27	36.34
tmed7	6	-7.36	0	0	-8.92	-7.46	-2.5	0	0	0	0	-56.26	-19.93	36.33
btr09	6	0	0	0	0	0	0	0	0	0	0	-106.93	-70.63	36.3
lxn	8	7.5	29.28	19.26	8.26	0	36.53	5.5	0	0	0	-4.5	31.77	36.27
ndufs8a	6	-1.04	0	-0.23	-12.11	0	0	0	0	0	0	-49.24	-13.09	36.15
ndufa5	6	-30.55	0	0	-37.27	-29.2	-14.38	0	0	0	0	-61.45	-25.51	35.94
si:dkey-188i13.11	6	-23.68	0	0	-24.86	-3.19	-6.61	0	0	0	0	-124.68	-88.75	35.93
glulb	6	-10.68	0	0	-6.49	-1.54	-1.99	0	0	0	0	-44.99	-9.1	35.89
pigf	6	0	0	0	-2.45	0	-3.56	0	0	0	0	-46.81	-10.95	35.86
psma4	6	-1.66	0	0	-2.54	-4.68	-0.73	0	0	0	0	-59.8	-23.97	35.83
araf	6	0	0	0	-4.06	0	0	0	0	0	0	-45.14	-9.53	35.61
serinc5	6	0	0	0	0	0	0	0	0	0	0	-35.52	0	35.52
si:dkey-286j15.3	6	0	0	0	0	0	0	0	0	0	0	-47.04	-11.63	35.41
parp16	6	0	0	0	-0.74	0	0	0	0	0	0	-48.47	-13.32	35.15
trappc5	6	-3.87	0	0	-0.97	0	0	0	-0.04	0	0	-53.07	-17.93	35.14
ndufa10	6	-33.89	0	-4.11	-46.98	-14.84	-20.64	0	0	0	0	-58.03	-22.96	35.07
tmem131	6	0	-3.26	-2.39	-19.66	-2.4	0	0	0	0	0	-63.8	-28.78	35.02
dnajc5ab	6	-1.2	0	-1.42	-13.99	0	0	0	-17.38	0	0	-85.85	-50.9	34.95
anxa11b	6	0	13.13	0	0	0	0	0	0.15	0	0	-64.79	-29.86	34.93
clic2	6	5.64	43.05	6.74	34.86	44.03	1.32	1.86	23.78	0	0	-129.83	-94.95	34.88
sh2d3cb	6	0	0	0	0	0	0	0	0	0	0	-32.81	2.02	34.83
atp5mf	6	-97.05	0	-9.78	-91.43	-47.78	-62.57	0	0	0	0	-111.74	-76.98	34.76
ubl7b	6	-5.62	1.07	0	0	0	0	0	0	0	0	-67.11	-32.37	34.74
ssuh2.3	6	0	0	0	-7.82	-3.01	0	0	0	0	0	-53.44	-18.71	34.73
ip6k2a	6	0	0	0	0	-0.02	0	0	0	0	0	-50.51	-15.86	34.65
rpl11	5	0	90.36	22.35	22.34	0	4.35	1.52	49.39	0	0	-34.54	0	34.54
ppp1caa	6	-1.82	0	0	-5.11	-1.12	0	0	0	0	0	-39.73	-5.21	34.52
dip2ba	6	0	0	0	0	0	0	0	-2.28	0	0	-60.54	-26.09	34.45
h2afvb	6	-43.5	16.37	-5.11	-18.15	-2.85	-20.12	0	0	0	0	-80.9	-46.46	34.44
slc25a43	6	-1.52	0	0	0	0	0	0	0	0	0	-57.08	-22.64	34.44
ndufs4	6	-2.73	0	-2.88	-23.44	-3.67	-11.94	0	0	0	0	-66.21	-31.82	34.39
nub1	6	-24.31	0	-1.83	-3.68	-2.39	0	0	0	0	0	-54.05	-19.68	34.37
galm	6	0	0	0	-0.21	0	0	0	0	0	0	-55.88	-21.64	34.24
zgc:92360	6	5.18	0	0	0	0	0	0	0	0	0	-33.34	0.88	34.22
aktip	6	-5.62	0	0	-2.53	0	-2.75	0	0	0	0	-34.21	0	34.21
smim15	6	0	11.44	0	0	0	0	0	0	0	0	-55.81	-21.67	34.14
arl8ba	6	-30.34	0	-0.81	-11.09	0	0	0	-11.22	0	0	-57.35	-23.31	34.04
abcc13	6	0	0	0	0	0	0	0	0	0	0	-33.85	0	33.85
hnrnpa0a	6	-30.26	-5.95	-10.98	-72.42	-20.42	-18.72	0	-21.69	0	0	-152.63	-118.81	33.82
tes	6	0	0	0	-6.04	-19.99	-22.79	0	0	0	0	-96.68	-62.88	33.8
CU655842.1	6	0	0	0	0	0	0	0	0	0	0	-51.66	-17.86	33.8
bida	6	-5.97	0	-3.15	0	-6.51	0	0	0	0	0	-48.05	-14.31	33.74
p4hb	6	0	0	0	0	-0.56	-0.98	0	6.46	0	0	-33.62	0	33.62
fh	6	-3.92	0	0	-4.05	0	0	0	0	0	0	-45.82	-12.24	33.58
CABZ01046997.1	6	0	0	0	0	0	0	0	0	0	0	-38.48	-5.12	33.36
pggt1b	6	0	0	0	0	0	0	0	0	0	0	-33.21	0	33.21
ndufb5	6	-23.24	0	-2.76	-38.22	-10.51	-10.04	0	0	0	0	-62.92	-29.72	33.2
si:zfos-464b6.2	6	0	0	0	0	0	0	0	0	0	0	-33.18	0	33.18
psmb10	6	-7.36	0	0	-4.17	-10.06	-10.5	0	0	-0.29	0	-75.98	-42.86	33.12
sdha	6	-5.41	0	-3.8	-39.93	-1.01	-8.75	0	0	0	0	-94.41	-61.29	33.12
cetn4	6	-7.78	0	0	0	-1.64	0	0	0	0	0	-32.92	0	32.92
zgc:63863	6	-11.55	0	0	-1.12	0	-0.5	0	0	0	0	-32.89	0	32.89
eef1a1l1	5	-38.58	60.32	0	0	0	1.67	6.81	15.32	0	0	-34.82	-1.97	32.85
scmh1	6	0	0	0	0	-5.34	0	0	0	0	0	-40.67	-7.88	32.79
helz2	6	-5.22	0	-0.48	-9.46	-10	-1.1	0	0	0	0	-173.7	-140.93	32.77
ppm1j	6	-8.75	0	-0.65	-0.27	0	0	0	0	0	0	-32.55	0.11	32.66
fam117ab	6	0	0	0	0	0	0	0	-5.77	0	0	-32.55	0	32.55
si:ch211-173p18.3	6	0	0	0	-1.04	0	0	0	0	0	0	-38.58	-6.07	32.51
cct7	6	19.76	19.97	0.46	0	0	0	0	10.01	0	0	-33.6	-1.14	32.46
selenok	6	-24.59	0	0	-17.44	-2.29	0	0	0	0	0	-61.71	-29.25	32.46
dpy30	6	0	0	0	0	-1.79	-2.29	0	0	0	0	-48.68	-16.24	32.44
frg1	6	-12.07	0	0	-9.59	-2.29	-1.15	0	-0.12	0	0	-32.44	0	32.44
apol1	6	0	0	0	0	0	0	0	-4.92	0	0	-57.07	-24.69	32.38
fybb	12	-5.11	0	0	0	-0.4	0	0	0	0	0	0	32.37	32.37
stambpa	6	0	0	0	0	0	0	0	0	0	0	-38.48	-6.19	32.29
rnf213a	6	-12.98	-76.83	0	0	0	0	0	0	0	-1.77	-134.41	-102.3	32.11
serbp1a	12	84.02	3.14	42.29	76.41	10.03	55.47	8.16	30.11	0	0	12.24	44.29	32.05
pdia6	6	0	0	0	-0.65	-1.31	-14.8	0	0	0	0	-32.04	0	32.04
si:ch211-260e23.9	6	-2.27	0	0	0	0	0	0	0	0	0	-32.04	0	32.04
abcb10	6	0	0	0	0	-1	0	0	0	0	0	-31.96	0	31.96
churc1	6	1.63	0	0	0	0	0	0	0	0	0	-31.77	0.11	31.88
CR855311.1	9	0	-25.76	0	7.75	7.94	0	0	-1.58	0	0	-32.89	-1.03	31.86
rpl5a	5	36.46	52.61	24.82	49.74	12.38	23.47	4.9	38.75	0	0	0	31.8	31.8
bsdc1	6	0	0	0	0	0	0	0	0	0	0	-42.25	-10.46	31.79
mxa	6	-11.85	0	0	-1.64	-1.31	-9.08	0	0	0	0	-154.2	-122.42	31.78
med8	6	-14.36	0	0	-2.08	-2.42	-1.46	0	0	0	0	-31.69	0	31.69
cct4	6	0	13.99	0	0	-3.08	0	0	0	0	0	-34.23	-2.55	31.68
mov10b.1	6	-22.51	0	-0.16	-5.54	-7.9	-6.43	0	-10.13	0	0	-133.43	-101.81	31.62
ndufa2	6	-8.66	0	0	-17.21	-14.25	-9.03	0	0	0	0	-62.4	-30.88	31.52
cpa5	6	0	0	0	0	-9.41	0	0	-10.07	0	0	-31.5	0	31.5
zgc:100918	6	0	0	0	-4.41	0	0	0	0	0	0	-41.89	-10.5	31.39
arpc1b	6	16.14	13.34	0	0	0	0	0	4.54	0	0	-63.46	-32.17	31.29
ndufs2	6	-5.55	0	0	-12.66	0	-6.22	0	0	0	0	-62.57	-31.39	31.18
idh1	6	0	0	0	-1.17	-0.5	0	0	0	0	0	-34.14	-2.97	31.17
sdhc	6	-6.97	0	0	-7.12	0	0	0	0	0	0	-28.47	2.66	31.13
fbxo25	6	-59.46	0	-1.04	-20.03	-0.63	0	0	-2.67	0	0	-33.68	-2.56	31.12
rpsa	5	0	97.45	19.07	20.2	0.58	14.02	8.21	71.03	0	0.16	-0.37	30.63	31
ndufa9a	6	-11.93	0	-2.78	-27.45	-5.43	-5.54	0	0	0	0	-61.95	-31.13	30.82
rab42b	6	0	0	0	0	0	0	0	0	0	0	-35.16	-4.36	30.8
ube2g2	6	0	0	0	0	0	0	0	0	0	0	-40.2	-9.44	30.76
plpp1a	6	0	0	0	0	0	0	0	-27.15	0	0	-42.52	-11.83	30.69
zgc:77849	6	-14.33	0	0	0	-4.03	0	0	0	0	0	-30.62	0	30.62
ldhba	6	-48.81	17.51	-6.48	-73.16	-24.79	-26.18	0	5.65	0	0	-46.97	-16.36	30.61
psmd4a	6	0	0	-0.34	-7.94	-1.74	-5.51	0	0	0	0	-62.39	-31.78	30.61
psma5	6	0	7.1	0	-3.82	-4.13	-12	0	0	0	0	-76.05	-45.47	30.58
apip	6	0	0	0	0	0	0	0	0	0	0	-27.77	2.66	30.43
ubald1a	6	0	0	0	0	0	0	0	0	0	0	-33.57	-3.15	30.42
otub1a	6	0	0	0	-0.05	0	0	0	0	0	0	-42.54	-12.14	30.4
si:dkey-117a8.1	6	0	0	0	0	0	0	0	0	0	0	-41.81	-11.42	30.39
cd81a	6	-5.87	0	0	0	0.33	0	0	-1.57	0	0	-80.42	-50.04	30.38
rpl15	7	41.63	10.13	27.46	54.44	26.5	45.44	1.15	32.98	0	0	0.33	30.58	30.25
pdia4	6	0	0	0	0	-9.43	-7.62	0	0	0	0	-37.52	-7.33	30.19
eif1b	6	0	52.15	0	0	0	0	0.87	0	0	0	-57.5	-27.32	30.18
homezb	6	0	0	0	0	0	0	0	0	0	0	-30.17	0	30.17
hadh	6	0	0	0	0	0	0	0	0	0	0	-48.14	-17.99	30.15
pdcd5	6	0	0	0	0	0	0	0	0	0	0	-33	-2.91	30.09
si:ch211-152p11.4	6	0	0	0	0	0	0	0	2.72	0	0	-54.8	-24.73	30.07
commd3	6	0	0	0	0	0	0	0	0	0	0	-38.81	-8.77	30.04
ndufa7	6	-30.77	0	-1.08	-32.15	-14.56	-15.57	0	0	0	0	-66.02	-36.04	29.98
calcoco2	6	0	0	0	0	0	0	0	0	0	0	-44.07	-14.13	29.94
baxb	6	0	0	0	0	0	0	0	0	0	0	-45.27	-15.35	29.92
eml2	6	0	0	0	0	0	0	0	0	0	0	-29.89	0	29.89
si:ch211-212k18.4	6	0	0	0	0	0	0	0	0	0	0	-33.56	-3.67	29.89
ube2kb	6	-0.5	0	0	-0.81	0	0	0	0	0	0	-58.1	-28.26	29.84
alox12	6	0	0	0	0	-0.13	0	0	-6.66	0	0	-35.13	-5.3	29.83
glo1	6	-9.21	0	0	-3.04	0	0	0	-11.91	0	0	-38.05	-8.24	29.81
psma8	6	0	7.38	0	0	-1.82	-10.71	0	0	0	0	-39.54	-9.75	29.79
dlst	6	0	5.72	0	-10.2	0	-0.79	0	0.47	0	0	-41.91	-12.13	29.78
cct5	5	0	31.38	0	0	-1.25	0	0	0	0	0	-34.66	-4.92	29.74
parp12b	6	0	0	0	-1.17	-19.47	-0.81	0	0	0	0	-90.75	-61.02	29.73
acadvl	6	-3.1	0	0	-3.38	0	0	0	0	0	0	-37.69	-8.03	29.66
pdha1a	6	-0.36	0	0	-15.64	-1.92	-6.84	0	0	0	0	-57.17	-27.54	29.63
tprg1	6	0.04	0	0	0	0	0	0	0	0	0	-29.62	0	29.62
ISCU (1 of many)	6	-25.28	0	0	-22.82	-1.37	-0.09	0	0	0	0	-44.23	-14.73	29.5
rpl8	5	51.48	127.2	39.31	80.27	21.28	21.08	12.32	72.94	0	0	0	29.46	29.46
acp1	6	0	0	0	-4.28	0	-4.23	0	0	0	0	-50.17	-20.74	29.43
dcun1d2b	6	0	0	0	0	0	0	0	0	0	0	-29.36	0	29.36
si:ch211-14a17.11	6	0	0	0	-7.82	-3.79	0	0	0	0	0	-29.28	0	29.28
uqcrc2a	6	0	0	0	0	0	0	0	0.05	0	0	-38.75	-9.52	29.23
sult2st1	16	-1.6	0	0	-35.93	-13.84	0	0	0	0	0	0	29.17	29.17
nat9	6	0	0	0	-1.63	0	-0.63	0	0	0	0	-35.6	-6.49	29.11
pfdn6	6	0	0	0	-4.09	-5.63	-2.07	0	0	0	0	-50.5	-21.43	29.07
zfr2	6	0	0	0	0	0	0	0	0	0	0	-29.03	0	29.03
znhit1	6	0	0	0	-0.93	0	0	0	0	0	0	-29.03	0	29.03
glrx	6	7.9	0	0	0	0	0	0	0	0	0	-44.56	-15.65	28.91
cd83	9	0	-21.76	0	3.08	0	2.77	0	0	0	0	-28.9	0	28.9
triqk	6	0	0	0	0	0	0	0	0	0	0	-28.88	0	28.88
atp5meb	6	-18.94	6.25	-2.55	-49.31	-15.09	-15.69	0	0	0	0	-37.86	-9.02	28.84
mpc2	6	-0.15	0	0	-17.32	-4.87	-4.95	0	0	0	0	-38.98	-10.15	28.83
MPC2	6	-0.15	0	0	-17.32	-4.87	-4.95	0	0	0	0	-38.98	-10.15	28.83
usp18	6	0	0	0	-2.79	-2.25	-1.96	0	0	0	0	-108.24	-79.41	28.83
lyrm4	6	0	0	0	-5.3	-5.16	-2.78	0	0	0	0	-45.49	-16.69	28.8
LYRM4	6	0	0	0	-5.3	-5.16	-2.78	0	0	0	0	-45.49	-16.69	28.8
rps23	5	0	90.74	16.87	6.4	0	4.51	1.08	47.12	0	0	-28.69	0	28.69
nek7	6	0	0	-1	-11.19	-1.03	0	0	0	0	0	-51.03	-22.38	28.65
rpl7a	5	11.15	117.53	34.55	63.06	7.51	20.33	6.96	74.06	0	0	-28.6	0	28.6
rad23b	6	0	0	0	0	0	0	0	0	0	0	-34.54	-5.95	28.59
chmp7	6	0	0	0	0	0	0	0	0	0	0	-38.42	-9.86	28.56
si:ch211-284e13.9	6	0	0	0	2.41	0	0	0	0.05	0	0	-45.57	-17.05	28.52
zgc:175088	6	-2.06	0	0	0	0	0	0	6.64	0	0	-32.15	-3.64	28.51
ndufs7	6	0	0	0	-12.9	-4.39	-5.78	0	0	0	0	-35.54	-7.07	28.47
psmb1	6	0	2.76	0	-11.67	-5.24	-19.9	0	0	0	0	-82.59	-54.2	28.39
gstm.2	6	0	0	0	0	0	0	0	0.1	0	0	-32.78	-4.45	28.33
tmem18	6	0	0	0	0	0	0	0	0	0	0	-36	-7.71	28.29
flot1b	6	0	0	0	0	0	0	0	0	0	0	-36.19	-7.93	28.26
ndufc2	6	-34	3.76	-3.07	-35.61	-0.92	-16.71	0	0	0	0	-62.95	-34.73	28.22
ppargc1b	6	-1.4	0	-5.26	-10.27	0	0	0	0	0	0	-49.22	-21.08	28.14
agtrap	6	-38.9	0	-1.04	-18.02	-0.98	-5.96	0	-15.86	0	0	-35.93	-7.83	28.1
mrps18a	6	0	0	0	0	-1.31	0	0	0	0	0	-25.52	2.52	28.04
actr2a	6	0	0	0	0	0	0	0	0	0	0	-28.95	-0.92	28.03
suclg2	6	-25.34	0	-6.46	-21.6	-1.92	-4.49	0	0	0	0	-90.96	-62.93	28.03
atp5pb	6	-6.13	10.62	0	-15.64	-0.95	-4.15	0	3.3	0	0	-40.39	-12.44	27.95
si:dkey-112e7.2	5	-0.18	40.79	6.69	4.57	0.69	22.25	10.29	2.55	0	0	-21.55	6.27	27.82
polr2j	6	0	0	0	0	0	0	0	0	0	0	-19.51	8.23	27.74
ccdc32	6	0	0	0	0	0	0	0	0	0	0	-31.87	-4.19	27.68
micos13	6	0	0	-0.29	-13.87	-3.86	-6.61	0	0	0	0	-47.01	-19.35	27.66
ero1b	6	0	0	0	0	-0.6	0	0	0	0	0	-33.94	-6.3	27.64
cyth4b	6	0	0	0	0	0	-1.55	0	0	0	0	-38.1	-10.55	27.55
syf2	6	-16.79	0	0	-2.89	-2.79	0	0	0	0	0	-42.08	-14.55	27.53
pkma	6	4.41	0	0	0	0	0	0	0.56	0	0	-64.7	-37.21	27.49
rabif	6	0	0	0	-3.01	0	-5.07	0	0	0	0	-50.11	-22.68	27.43
tap2a	6	0	0	-3.71	-2.33	-2.71	0	0	0	0	0	-45.97	-18.54	27.43
rpl26	6	-10.02	0	-1.83	0	-5.56	-2.13	0	0	0	0	-65.27	-37.85	27.42
h1fx	5	-7.08	56.19	0	0	-4.34	-3.49	0	0	0	0	-27.62	-0.21	27.41
ufd1l	6	-2.58	0	0	0	0	0	0	0	0	0	-34.09	-6.73	27.36
psma1	6	-1.09	9.14	0	0	-0.83	0	0	0	0	0	-53.43	-26.11	27.32
psmc6	6	0	0	0	-9.03	-8.02	-8.02	0	0	0	0	-72.31	-45.07	27.24
papss2b	6	0	0	0	0	0	0	0	0	0	0	-25.66	1.46	27.12
arhgap29b	6	0	0	0	-2.76	0	0	0	0	0	0	-58.49	-31.38	27.11
med6	6	0	0	0	-4.74	-0.73	0	0	0	0	0	-37.4	-10.33	27.07
blmh	6	-2.88	0	0	-1.93	0	-0.73	0	0	0	0	-46.1	-19.07	27.03
waplb	6	-4.23	0	-0.9	-5.01	0	0	0	0	0	0	-25.39	1.64	27.03
ppp2r3c	6	-7.05	0	0	-2.29	0	-2.08	0	0	0	0	-27	0	27
emc2	6	0	0	0	0	0	0	0	0	0	0	-23.91	3.08	26.99
atp5md	6	-46.53	0	-14.76	-84.49	-42.46	-42.37	0	0	0	0	-79.08	-52.09	26.99
cfl1l	12	0	0	0	-6.35	-20.17	-5.21	0	-34.26	0	0	0	26.88	26.88
cst14a.2	6	0	11.09	-2.72	-11.76	0	-2.44	0	0	0	0	-36.66	-9.86	26.8
mindy1	6	0	0	0	0	0	0	0	0	0	0	-26.78	0	26.78
si:dkey-151g10.6	5	-28.68	69.99	0.74	0	-12.89	0	0	3.16	-2.32	0	-37.49	-10.71	26.78
erlec1	6	0	0	0	0	0	0	0	0	0	0	-26.69	0	26.69
ppp1r10	6	-7.09	0	0	-3.8	-4.27	-3.53	0	0	0	0	-56.91	-30.22	26.69
tax1bp3	6	4.51	0	0	0	6.53	0	0	0	0	0	-42.51	-15.82	26.69
eif4e3	6	0	0	0	0	0	0	0	0	0	0	-33.04	-6.44	26.6
sh3bgrl3	6	0	0	0	0	0	0	0	0	0	0	-26.56	0	26.56
calm2b	5	-19.52	27.06	0	-12.72	-2	-8.09	0	0	0	0	-42.28	-15.85	26.43
erap1b	6	-3.04	0	-0.34	0	-1.24	-0.38	0	0	0	0	-40.94	-14.52	26.42
eif3i	6	-5.75	1.13	0	0	0	4.72	0	0	0	0	-26.32	0	26.32
ccdc6a	6	0	0	0	0	0	0	0	0	0	0	-33.8	-7.49	26.31
cfap20	6	10.08	0	0	0	0	0	0	0.77	0	0	-26.3	0	26.3
rps19	5	4.9	114.22	18.89	30.64	0	5.65	4.82	45.58	0	0	-26.29	0	26.29
kmt2e	6	-5.95	0	0	0	0	0	0	0	0	0	-28.45	-2.21	26.24
smim29	6	0	0	0	0	0	0	0	0	0	0	-27.77	-1.55	26.22
phc2a	6	0	0	0	0	-1.84	0	0	0	0	0	-32.15	-5.97	26.18
xpo6	6	-4.92	0	0	-2.37	-0.09	-1.41	0	0	0	0	-41.72	-15.54	26.18
irf2	6	0.46	0	0	0	0	3.91	0	0.54	0	0	-27.06	-0.89	26.17
dpp3	6	0	0	0	0	0	-2.91	0	0	0	0	-47.86	-21.75	26.11
tmc6b	6	0	0	0	0	-1.42	0	0	0	0	0	-48.05	-21.97	26.08
ponzr1	6	-1.62	0	0	0	-1.89	-5.05	0	0	0	0	-177.06	-151	26.06
ncoa4	6	-10.87	0	0	-4.62	0	0	0	0	0	0	-34.36	-8.32	26.04
zgc:158868	6	0	0	0	0	0	0	0	-18.47	0	0	-26	0	26
psmd6	6	0	0	0	-1.31	-0.23	-3.57	0	0	0	0	-39.15	-13.22	25.93
dcun1d5	6	0	0	0	0	0	0	0	0	0	0	-31.35	-5.5	25.85
csrnp1b	13	-16.99	-14.27	0	0	0	4.69	0	0	0	0	1.53	27.38	25.85
eny2	6	0	0	-0.23	-5.03	-0.4	-5.32	0	0	0	0	-52.86	-27.02	25.84
rnf169	6	0	0	0	0	0	0	0	0	0	0	-32.14	-6.32	25.82
si:rp71-45k5.4	6	-42	0	0	-19.32	-5.59	-12.35	0	0	0	0	-38.98	-13.24	25.74
ppt1	5	-10.79	14.53	0	0	0	0	0	0	0	0	-34.77	-9.04	25.73
fes	6	-3.71	0	0	-8.68	0	0	0	-1.16	0	0	-49.85	-24.15	25.7
syne2b	6	0	0	0	0	0	0	0	0	0	0	-25.01	0.61	25.62
sat1a.1	12	0	0	0	0	0	0	0	0	0	0	14.03	39.61	25.58
ftr05	6	0	0	0	0	0	0	0	0	0	0	-25.56	0	25.56
si:ch73-170d6.3	6	0	0	0	0	-14.56	0	0	0	0	0	-37.72	-12.16	25.56
xpo1b	6	-14.6	0	0	-6.77	-3.18	-0.03	0	0	0	0	-41.39	-15.93	25.46
mlf2	6	0	0	0	0	0	0	0	0	0	0	-25.4	0	25.4
fkbp2	6	3.86	8.85	0	0	0.91	0	0	0	0	-0.01	-24.03	1.34	25.37
h2afx1	5	-2.18	49.88	0	0	-2.67	0	0	3.37	0	0	-36.7	-11.38	25.32
phf5a	6	-25.09	0	-2.46	-11.55	-7.51	-8.15	0	0	0	0	-40.89	-15.57	25.32
moxd1	6	-29.43	0	-5.74	0	0	0	0	2.88	0	0	-32.84	-7.56	25.28
atp5f1c	6	0	0.65	0	-16	0	-7.82	0	0	0	0	-42.73	-17.45	25.28
trappc6b	6	0	0	0	0	0	0	0	0	0	0	-53.02	-27.81	25.21
CR382370.2	6	0	0	0	0	0	0	0	0	0	0	-42.61	-17.4	25.21
gadd45ab	6	0	0	0	-2.68	-15.4	0	0	0	0	0	-25.14	0	25.14
arglu1a	6	4.09	0	0	0	0	0	0	0	0	0	-25.13	0	25.13
znf207a	6	0	0	0	-0.8	0	0	0	0	0	0	-25.11	0	25.11
tradd	6	-0.72	0	0	0	0	0	0	0	0	0	-41.95	-16.87	25.08
tapbpl	6	0	0	0	0	0	0	0	0	0	0	-31.79	-6.71	25.08
eaf1	6	-0.49	0	0	-2.73	0	0	0	0	0	0	-31.26	-6.19	25.07
zgc:86598	6	-3.58	0	0	-3.09	-0.78	-0.26	0	0	0	0	-30.1	-5.05	25.05
tagapa	6	-16.4	0	0	-5.03	-5.51	0	0	-6.44	0	0	-102.44	-77.39	25.05
tmem11	6	1.45	0	0	0	0	0	0	0	0	0	-24.07	0.96	25.03
eif2s1b	5	0	10.87	0	0	0	2.38	0	11.03	0	0	-29.3	-4.29	25.01
aldh8a1	6	0	0	1.32	0	0	0	0	0	0	0	-25	0	25
tmem167a	6	0	0	0	0	2.08	0	0	0	0	0	-40.7	-15.71	24.99
ndufa12	6	-18.64	0	-3.66	-46.31	-9.5	-19.19	0	0	0	0	-45.2	-20.22	24.98
tiparp	6	-5.94	0	0	-0.07	0	0	0	-5.16	0	0	-58.66	-33.68	24.98
cct2.1	5	-3.02	27.26	0	0	-4.44	0	0	0	0	0	-23.57	1.4	24.97
c1qa	5	9.69	94.21	19.76	80.85	86.94	35.54	16.3	95.17	0	0	0	24.94	24.94
si:ch211-235e9.6	6	-24.52	0	0	-36.98	-15.79	-16.52	0	0	0	0	-69.44	-44.5	24.94
pomp	6	0	0	0	-4.34	-10.85	-11.85	0	0	0	0	-51.51	-26.6	24.91
sh3glb1b	6	0	0	0	0	0	0	0	0	0	0	-35.23	-10.34	24.89
atp6v1aa	6	-39.95	0	-2.19	-25.09	-0.35	-4.67	0	0	0	0	-54.82	-29.95	24.87
cnot1	6	0	0	0	0	0	0	0	0	0	0	-35.11	-10.26	24.85
si:ch211-219a4.3	6	-7.18	0	0	0	-5.29	0	0	0	0	0	-100.04	-75.24	24.8
rap2b	6	-5.62	0	0	0	0	0	0	-0.38	0	0	-33.62	-8.84	24.78
NDUFB1	6	-24.64	0	0	-6.06	-5.65	-4.88	0	0	0	0	-24.76	0	24.76
ube2v1	6	11.62	0.15	0	0	0	0	0	0.42	0	0	-33.88	-9.24	24.64
pdss1	6	0	0	0	-2.73	-1.25	-1.19	0	0	0	0	-30.2	-5.57	24.63
pmp22b	11	76	24.26	13.97	41.55	60.44	12.04	0	11.86	0	0	0	24.61	24.61
sccpdhb	6	0	0	0	0	0	0	0	0	0	0	-29.19	-4.6	24.59
ip6k2b	6	-16.31	0	0	-3.34	-14.01	0	0	-7.84	0	0	-118.48	-93.9	24.58
rps14	5	0	84.74	5.06	17.85	0	8.65	1.51	60.16	0	0	-24.51	0	24.51
ufc1	6	0	0	0	-7	0	-0.04	0	0	0	0	-41.69	-17.18	24.51
fbxl6	6	-3.64	0	0	-5.12	-2.81	0	0	0	0	0	-27.48	-2.99	24.49
lsm6	6	-44.11	0	-3.64	-29.5	-13.42	-14.82	0	-2.03	0	0	-67.78	-43.29	24.49
maff	6	-39.3	0	0	-2.03	0	0	0	0	0	0	-56.75	-32.28	24.47
bloc1s2	6	0	0	0	-4.06	0	0	0	0	0	0	-43.56	-19.1	24.46
nfil3	12	0	0	0	0	-0.56	0	0	0	0	0	0	24.41	24.41
bpnt1	6	0	0	0	0	0	0	0	0	0	0	-26.26	-1.87	24.39
pfkfb4a	6	0	0	0	0	0	0	0	0	0	0	-34.05	-9.66	24.39
ctnnb1	6	0	0	0	0	0	0	0	0	0	0	-31.7	-7.33	24.37
nupr1a	6	-11.59	8.22	0	0	0	0	2.26	5.22	0	0	-24.35	0	24.35
zgc:153317	5	-15.14	47.02	0	-1.72	0.07	-0.98	0.64	0	0	0	-35.75	-11.4	24.35
smim4	6	3.64	0	0	0	0	0	0	0	0	0	-36.95	-12.64	24.31
zgc:77056	6	0	0	0	0	0	0	0	0	0	0	-30.31	-6	24.31
ttpal	6	0	0	0	-1.59	0	0	0	0	0	0	-40.2	-15.9	24.3
hint2	6	0	0	0	0	0	0	0	0	0	0	-23.03	1.26	24.29
timmdc1	6	0	0	0	-0.85	0	0	0	0	0	0	-23.56	0.69	24.25
naa80	6	0	0	0	0	-4.52	0	0	0	0	0	-24.15	0	24.15
cdc14ab	6	0	0	0	0	0	0	0	0	0	0	-31.53	-7.39	24.14
coro1ca	6	7.71	0	0	0	8.53	0	0	3.27	0	0	-24.11	0	24.11
acss1	6	-14.64	0	-0.57	-6.82	-2.51	-4.79	0	0	0	0	-46.76	-22.66	24.1
mettl5	6	0	0	0	-0.06	0	0	0	0	0	0	-29.74	-5.66	24.08
rmnd5b	6	0	0	0	0	0	0	0	0	0	0	-32.45	-8.43	24.02
ethe1	6	0	0	0	0	0	0	0	0	0	0	-30.42	-6.42	24
inpp5b	6	0	0	0	0	0	0	0	-11.9	0	0	-30.36	-6.37	23.99
parp9	6	0	0	0	0	-0.58	0	0	0	0	0	-58.96	-35.12	23.84
rps27a	5	3.31	105.82	28.17	32.68	5.11	18.08	3.62	51.69	0	0.01	-23.82	0	23.82
txnrd3	6	0	0	0	0	0	0	0	0	0	0	-34.08	-10.26	23.82
uba5	6	0	0	0	0	0	0	0	0	0	0	-23.78	0	23.78
arhgap1	6	0	0	-0.42	0	0	-1.52	0	0	0	0	-22.61	1.14	23.75
acbd3	6	6.89	0	0	0	0	0	0	0	0	0	-23.23	0.48	23.71
ACBD3	6	6.89	0	0	0	0	0	0	0	0	0	-23.23	0.48	23.71
eif2b2	6	0	0	0	0	0	-0.1	0	0	0	0	-29.87	-6.16	23.71
taf13	6	0	0	0	0	0	0	0	0	0	0	-40.48	-16.79	23.69
cox5aa	6	-9.13	7.86	-8.96	-46.84	-21.21	-33	0	0	0	0	-72.35	-48.67	23.68
mesd	6	0	0	0	0	0	-1.72	0	0	0	0	-28.33	-4.66	23.67
zgc:136864	6	0	0	0	0	-0.02	0	0	0	0	0	-23.64	0	23.64
ndufaf1	6	0	0	0	0	0	0	0	0	0	0	-28.69	-5.12	23.57
add3a	12	4.62	0	0	0	0	0	0	0	0	0	0	23.56	23.56
acadm	6	0	6.81	0	0	0	0	0	0	0	0	-26.35	-2.87	23.48
copa	6	-10.03	0	0	-5.4	-1.2	-1.02	0	0	0	0	-36.34	-12.87	23.47
ndufa1	6	-30.61	0	0	-30.46	-13.24	-8.91	0	0	0	0	-30.97	-7.51	23.46
pgam1b	6	0.25	0	0	0	0	0	0	0	0	0	-21.47	1.99	23.46
ugp2b	6	0	0	0	0	-0.13	0	0	0	0	0	-23.41	0	23.41
lzic	6	0	0	0	0	0	0	0	0	0	0	-29.83	-6.45	23.38
gtf2a1	6	0	0	0	0	0	0	0	0	0	0	-43.5	-20.13	23.37
nme2b.2	12	0	0	0	0	0	0	0	0	0	0	18.89	42.22	23.33
hsp90ab1	5	0	22.98	0.53	13.56	27.16	13.82	9.16	34.78	0	4.25	-23.32	0	23.32
si:ch211-203d1.3	6	0	0	0	-2.74	-1.74	0	0	-1.39	0	0	-25.4	-2.08	23.32
arhgdia	6	3.57	7.39	0	0	0	0	0	0	0	0	-33.49	-10.18	23.31
prdx3	6	0	0	0	-2.52	0	-5.9	0	0	0	0	-23.17	0.1	23.27
dnpep	6	0	0	0	0	-1.3	0	0	0	0	0	-23.24	0	23.24
fam107b	6	0	0	0	0	-4.79	0	0	-14.66	0	0	-23.23	0	23.23
nfkbiaa	6	-112.88	-7.55	-15.64	-14.84	-10.03	0	-2.55	-20.23	0	0	-56.26	-33.03	23.23
agr1	6	0	0	0	0	0	0	0	0	0	0	-23.22	0	23.22
akr1b1.2	5	0.66	23.12	5.42	22.42	4.02	11.93	2.14	28.51	0	0	-23.22	0	23.22
trim44	6	-0.13	0	0	0	0	0	0	0	0	0	-23.66	-0.46	23.2
caprin1b	6	0	0	0	0	0	5.51	0	0	0	0	-26.04	-2.86	23.18
fam214b	6	-1.85	0	0	0	-0.11	0	0	0	0	0	-30.46	-7.29	23.17
mospd1	6	-2.23	0	0	0	0	0	0	0	0	0	-23.17	0	23.17
rps4x	5	14.93	96.05	32.16	48.41	2.92	14.88	5.72	63.15	0	0	-23.17	0	23.17
cand1	6	0.92	0	0	0	0	0	0	0	0	0	-31.33	-8.16	23.17
wasa	6	0	0	0	-1.79	-10.62	0	0	0	0	0	-35.47	-12.3	23.17
psen1	6	-0.8	0	0	-5.72	-5.24	0	0	0	0	0	-44.25	-21.12	23.13
mtch2	6	0	0	0	-2.55	0	0	0	0	0	0	-22.47	0.65	23.12
zc3h7ba	6	0	0	0	0	-0.55	0	0	0	0	0	-61.29	-38.17	23.12
fkbp8	6	0	0	0	-3.97	-0.1	0	0	0	0	0	-45.01	-21.9	23.11
zgc:158398	6	-4.26	0	0	-2.97	0	0	0	0	0	0	-27.14	-4.04	23.1
pag1	6	0	0	0	0	0	0	0	0	0	0	-23.07	0	23.07
rpl23a	4	2.22	0	10.76	21.64	0	10.61	0	18.5	0	0	-23	0	23
arl6ip5a	6	0	0	0	0	0	0	0	0	0	0	-22.99	0	22.99
triobpa	6	0	0	0	-15.17	-11.42	-2.47	0	0	0	0	-22.98	0	22.98
hectd3	6	0	0	0	0	0	0	0	0	0	0	-21.43	1.43	22.86
sco1	6	0	0	0	0	0	0	0	0	0	0	-23.23	-0.39	22.84
vps26b	6	0	0	0	0	0	0	0	0	0	0	-20.14	2.7	22.84
arrb2a	6	0	0	0	0	-11.49	0	0	0	0	0	-22.8	0	22.8
ccm2	6	0	0	0	0	0	0	0	0	0	0	-22.78	0	22.78
nt5c3a	6	0	0	0	0	0	0	0	0	0	0	-45.24	-22.47	22.77
ndufv1	6	-11.12	0	0	-15.04	-2.45	-5.71	0	0	0	0	-42.67	-19.98	22.69
vps29	6	0	9.15	0	0	0	0	0	0	0	0	-27.94	-5.27	22.67
crlf3	6	0	0	0	0	0	0	0	0	0	0	-27.34	-4.69	22.65
crebl2	6	0	0	0	0	0	0	0	0	0	0	-22.64	0	22.64
tcp1	6	0	10.41	0	-0.79	0	-4.7	0	1.02	0	0	-35.72	-13.11	22.61
commd8	6	0	0	0	0	0	0	0	0	0	0	-28.73	-6.15	22.58
srp19	6	0	0	0	-4.63	0	-2.28	0	0	0	0	-26.34	-3.78	22.56
vta1	6	0	0	0	0	0	0	0	0	0	0	-36.98	-14.49	22.49
immt	6	0	0	0	-2.88	0	0	0	0	0	0	-20.92	1.53	22.45
pak2a	6	0	0	0	0	0	0	0	0	0	0	-22.41	0	22.41
rps5	5	0	101.03	19.91	49.17	4.59	17.24	3.36	62.53	0	0	-22.4	0	22.4
ctdsp1	6	-2.18	0	0	-4.8	-1.71	0	0	0	0	0	-24.34	-1.96	22.38
rps10	5	21.43	99.38	40.6	56.89	7.72	19.26	3.46	67.11	0	0	-22.37	0	22.37
kdm7ab	6	1.46	0	0	0	0	0	0	0	0	0	-22.36	0	22.36
psma3	6	0	0	0	-5.95	-6	-11.84	0	0	0	0	-55.65	-33.33	22.32
rpl38	6	-19.37	3.81	0	0	-11.46	0	0	12.78	0	0	-47.8	-25.49	22.31
lcp1	6	16.31	11.74	0	0	0	0	0	0	0	0	-22.26	0	22.26
dennd11	6	0	0	0	0	0	0	0	0	0	0	-22.23	0	22.23
tmem14ca	6	-3.66	0	0	-15.64	-9.12	-4.05	0	0	0	0	-40.01	-17.78	22.23
cmpk	6	6.06	0	0	0	-0.97	-0.29	0	0	0	0	-41.33	-19.18	22.15
klf11b	6	-6.39	0	0	0	0	0	0	0	0	0	-30.78	-8.66	22.12
aldh7a1	6	0	0	0	0	0	0	0	0	0	0	-22.06	0	22.06
psmg2	6	0	0	0	0	0	0	0	0	0	0	-19.56	2.47	22.03
fnta	6	-1.2	0	0	0	0	0	0	0	0	0	-37.56	-15.54	22.02
ik	6	-3.04	0	0	0	0	0	0	0	0	0	-21.99	0	21.99
borcs7	6	0	0	0	0	0	0	0	0	0	0	-21.98	0	21.98
ascl1b	6	0	0	0	-1.55	-5.51	-0.69	0	0	0	0	-118.49	-96.53	21.96
dok2	6	0	0	0	0	0	0	0	-24.28	0	0	-36.62	-14.67	21.95
ccdc115	6	-2.19	0	0	-2.02	0	-0.37	0	0	0	0	-37.57	-15.63	21.94
plcb3	6	0	0	0	0	0	0	0	0	0	0	-21.91	0	21.91
si:dkey-206d17.12	6	-8.08	0	0	0	-1.17	0	0	0	0	0	-45.18	-23.29	21.89
marcksl1b	6	-75.92	0	-3.78	-7.24	0	-5.69	0	0	0	0	-118.36	-96.51	21.85
fdx1	6	0	0	0	-0.99	0	0	0	0	0	0	-39.29	-17.45	21.84
idh2	6	0	21.22	0	0	0	0	0	8.67	0	0	-49.41	-27.59	21.82
meaf6	6	-1.04	0	0	-7.16	-0.15	0	0	0	0	0	-31.61	-9.82	21.79
gnao1a	6	0	0	0	0	0	0	0	0	0	0	-31.99	-10.25	21.74
fam13b	6	-1.05	0	0	0	0	0	0	0	0	0	-49.89	-28.18	21.71
uap1	6	0	0	0	0	0	0	0	0	0	0	-80.74	-59.03	21.71
stat1a	6	0	-4.08	0	0	-3.53	0	0	0	0	0	-40.35	-18.7	21.65
HACD4	12	0	0	0	1.07	0	0.45	0	0	0	0	0	21.64	21.64
lias	6	0	0	0	-3.6	-2.07	-0.27	0	0	0	0	-45.13	-23.5	21.63
ifit11	6	0	0	0	0	0	0	0	0	0	0	-38.91	-17.31	21.6
aste1a	6	51.04	-9.33	7.52	8.32	3.15	-1.4	0	8.98	0	0	-199.52	-177.98	21.54
alox5ap	12	21.53	0	5.03	0.46	0	1.98	0	2.28	0	0	2.24	23.78	21.54
si:dkey-88p24.11	6	0	0	0	0	0	0	0	0	0	0	-19.15	2.37	21.52
get4	6	0	0	0	0	0	0	0	0	0	0	-16.98	4.51	21.49
krt8	5	17.82	79.47	6.69	32.67	66.13	10.25	3.03	2.32	0	0	7	28.49	21.49
hdlbpa	6	0	0	0	0	3.7	0	0	1.31	0	0	-21.48	0	21.48
napab	6	-51.08	0	-1.2	-19.97	0	0	0	-6.34	0	0	-35.7	-14.26	21.44
cxxc1a	6	0	0	0	0	0	0	0	0	0	0	-18.36	3.06	21.42
fam50a	6	-8.1	0	0	-0.73	-0.99	0	0	0	0	0	-40.7	-19.34	21.36
gpalpp1	6	0	0	0	0	0	0	0	0	0	0	-16.49	4.87	21.36
ncbp2	6	0	0	0	0	0	-1.53	0	0	0	0	-33.55	-12.19	21.36
chrac1	6	0	0	0	0	0	0	0	0	0	0	-37.58	-16.27	21.31
mepce	6	0	0	0	0	0	0	0	0	0	0	-24.07	-2.78	21.29
MEPCE	6	0	0	0	0	0	0	0	0	0	0	-24.07	-2.78	21.29
sdhb	6	-21.26	0	-4.77	-24.3	-12.65	-11.23	0	0	0	0	-63.6	-42.31	21.29
gtf2e2	6	0	0	0	-0.34	0	-0.5	0	0	0	0	-30.68	-9.4	21.28
bag6	6	-0.34	0	0	-0.55	0	0	0	0	0	0	-24.63	-3.39	21.24
echs1	6	0	0	0	0	0	0	0	0	0	0	-20.39	0.84	21.23
hax1	6	-0.77	0	0	-3.61	-6.84	-1.73	0	-0.1	0	0	-41.47	-20.26	21.21
ppp6c	6	0	0	0	0	-2.99	0	0	0	0	0	-38.68	-17.49	21.19
naxd	6	0	0	0	-0.04	-1.99	0	0	0	0	0	-54.91	-33.72	21.19
lamtor2	6	0	0	0	-5.24	0	-4.21	0	0	0	0	-42.02	-20.85	21.17
taf12	6	0	5.86	0	0	0	0	0	0	0	0	-23.64	-2.48	21.16
anapc16	6	-0.38	5.66	0	0	0	0	0	0	0	0	-26.93	-5.78	21.15
gtpbp1	6	-1.58	0	0	-7.63	-0.76	-7.07	0	0	0	0	-42.32	-21.17	21.15
faub	6	0	0	0	0	0	-0.68	0	-1.08	0	0	-36.27	-15.19	21.08
hnrnph3	6	-4.85	0	0	0	0	0	0	0	0	0	-21.02	0	21.02
spag7	6	0	0	0	-1	0	-0.35	0	0	0	0	-27.91	-6.89	21.02
nfkbiab	6	-43.92	5.63	-13.75	-24.55	-15.47	-14.73	-1.8	-3.98	0	0	-36.09	-15.09	21
cct8	6	0	4.66	0	0	0	0	0	0	0	0	-21	0	21
cnp	12	13.25	0	2.48	4.59	0	0	0	-11.87	0	0	3	23.99	20.99
med11	6	0	0	0	0	0	0	0	0	0	0	-20.99	0	20.99
rbm48	6	0	0	0	0	0	0	0	0	0	0	-20.93	0	20.93
mdm2	6	-12.44	0	-3.54	-9.06	-11.51	-0.14	0	0	0	0	-33.84	-12.93	20.91
pim1	13	-30.36	0	0	0	-1.15	0	0	-13.3	0	0	2.13	23.03	20.9
smim14	6	0	0	0	0	0	0	0	0	0	0	-28.43	-7.55	20.88
agla	6	0	0	0	0	0	0	0	0	0	0	-30.21	-9.35	20.86
ndufa8	6	0	0.33	0	-11.1	0	-6.15	0	0	0	0	-42.9	-22.06	20.84
etfb	6	0	0	0	0	0	0	0	0	0	0	-20.82	0	20.82
slc26a5	6	0	0	0	-1.28	0	0	0	-4.77	0	0	-35.25	-14.44	20.81
rpl36	6	-37.88	6.14	0	0	-10.46	0	0	10.41	-2.88	0	-31.99	-11.19	20.8
si:cabz01007802.1	6	0	0	0	0	0	0	0	0	0	0	-20.76	0	20.76
agpat4	6	21.28	0	0	0	0	0	0	0	0	0	-34.52	-13.77	20.75
tmem214	6	0	0	0	0	0	0	0	0	0	0	-24.89	-4.14	20.75
si:dkey-204f11.64	6	0	0	0	0	0.78	0	0	0.78	0	0	-37.33	-16.59	20.74
memo1	6	0	0	0	0	0	0	0	0	0	0	-27.27	-6.6	20.67
rps28	6	-33.68	20.03	0	0	-19.17	0	0	11.75	-0.13	0	-40.76	-20.09	20.67
gramd4b	6	0	0	0	0	0	0	0	0	0	0	-20.65	0	20.65
txlna	6	0	0	0	0	0	0	0	0	0	0	-25.76	-5.12	20.64
glrx2	6	0	0	0	0	0	0	0	0	0	0	-20.62	0	20.62
CU499336.2	6	-23.32	0	-2.3	-17.63	-13.67	-2.32	0	-16.72	0	0	-74.02	-53.41	20.61
tbca	6	0	3.28	0	-0.87	0	-2.05	0	0	0	0	-35.79	-15.2	20.59
kdm5bb	6	4.93	0	0	0	0	0	0	0	0	0	-17.43	3.12	20.55
mtap	6	0	0	0	0	-0.26	0	0	0	0	0	-20.55	0	20.55
aldh6a1	12	0	0	0	0	-1.35	0	0	0.48	0	0	0.01	20.56	20.55
snrpa	6	0	0	0	0	-0.93	0	0	0	0	0	-28.68	-8.16	20.52
glipr1a	6	0	0	0	-17.06	-10.41	-4.13	0	0	0	0	-56.68	-36.18	20.5
si:ch211-200p22.4	6	0	0	0	0	0	0	0	0	0	0	-20.5	0	20.5
prkcdb	6	-9.18	0	-0.38	-4.5	0	-1.75	0	-0.15	0	0	-26.05	-5.56	20.49
fis1	6	-3.64	0	0	-4.13	0	-2.89	0	-9.49	0	0	-54.13	-33.71	20.42
mov10a	6	0	0	0	-1.17	0	0	0	0	0	0	-56.46	-36.05	20.41
ZNF335	6	0	0	0	0	0	0	0	0	0	0	-20.33	0	20.33
dync1i2a	6	0	0	0	0	0	0	0	0	0	0	-20.2	0	20.2
glrx5	6	0	0	0	-2.03	0	-3.58	0	0	0	0	-29.08	-8.89	20.19
cox5ab	6	-29.19	0	-1.51	-29.28	-24.36	-27.63	0	0	0	0	-42.46	-22.28	20.18
ssuh2.2	6	0	0	0	-6.49	-3.75	0	0	0	0	0	-64.87	-44.7	20.17
si:dkey-85k7.12	6	-10.92	0	-2.57	-10.45	-14.01	-11.09	0	0	0	0	-194.77	-174.65	20.12
kdm5ba	6	0	0	0	0	0	0	0	0	0	0	-20.1	0	20.1
cenpx	6	0	0	0	0	0	-0.39	0	0	0	0	-20.08	0	20.08
ptp4a1	6	1.91	0	0	0	0	0	0	0	0	0	-23.24	-3.17	20.07
kctd12.2	7	118.24	34.72	26.88	107.19	62.44	61.36	11.75	11.19	0	0	17.94	38.01	20.07
serinc2	6	-15.8	7.31	0	0	0	0	0	0	0	0	-39.93	-19.89	20.04
strap	6	0	0	0	0	0	0	0	0	0	0	-31.02	-10.99	20.03
psmd1	6	0	0	0	-10.09	-1.17	-8.86	0	0	0	0	-44.72	-24.74	19.98
ENSDARG00000043475	9	-0.89	-41.54	0	-5.76	0	0	0	-0.24	0	0	-26.67	-6.73	19.94
sybl1	6	-2.32	0	0	0	0	0	0	-1.14	0	0	-21.58	-1.66	19.92
washc2c	6	0	0	0	0	0	0	0	0	0	0	-26.97	-7.05	19.92
CABZ01088428.1	6	0	0	0	0	0	-4.61	0	0	0	0	-19.88	0	19.88
glyr1	6	0	0	0	0	0	0	0	0	0	0	-29.22	-9.34	19.88
stt3b	6	1.5	0	0	0	0	0	0	0	0	0	-19.86	0	19.86
dhdds	6	0	0	0	0	0	0	0	0	0	0	-24.8	-4.98	19.82
aurkaip1	6	4.34	0	0	0	0	0	0	0	0	0	-27.19	-7.4	19.79
stk24b	6	0	0	0	0	0	0	0	0	0	0	-19.77	0	19.77
rab5aa	6	-1.53	0	0	0	0	0	0	0	0	0	-26.87	-7.13	19.74
higd2a	6	0	7.96	0	0	0	0	0	0	0	0	-30.86	-11.15	19.71
coa6	6	0	0	0	-4.65	-0.03	-1.94	0	0	0	0	-18.65	1.05	19.7
tbc1d15	6	-0.68	0	0	0	0	0	0	0	0	0	-22.14	-2.47	19.67
zgc:193541	6	-35.64	0.47	-1.66	-52.14	-8.37	-31.22	0	0	0	0	-60.46	-40.79	19.67
fam32a	6	-1.99	0	0	0	0	0	0	0	0	0	-25.51	-5.86	19.65
etfa	6	0	0	0	-0.75	0	0	0	0	0	0	-27.32	-7.67	19.65
pdcd10b	6	0	0	0	-3	0	0	0	0	0	0	-33.53	-13.88	19.65
si:ch211-233a24.2	6	-3.41	0	-0.99	-9.32	0	0	0	0	0	0	-19.65	0	19.65
ap1m1	6	0	0	0	-0.73	-0.45	-0.88	0	0	0	0	-44.49	-24.85	19.64
ppib	6	0	2.48	0	0	0	-1.55	0	12.68	0	0	-19.64	0	19.64
hyou1	6	0.15	0	0	0	0	-6.34	0	0	0	-2.19	-19.62	0	19.62
cops8	6	0	0	0	0	0	0	0	0	0	0	-29.44	-9.83	19.61
spast	6	0	0	0	0	0	0	0	0	0	0	-18.9	0.7	19.6
upf3b	6	0	0	0	-1.54	-2.25	0	0	0	0	0	-24.8	-5.22	19.58
lrrc59	6	0	0	0	0	0	-0.5	0	0	0	0	-19.54	0	19.54
utrn	6	0	0	0	-1.59	-1.3	0	0	0	0	0	-25.71	-6.17	19.54
glud1b	6	0	0	0	0	0	0	0	2.13	0	0	-23.7	-4.17	19.53
orai1a	6	0	0	0	-0.95	0	0	0	0	0	0	-35.99	-16.47	19.52
tcf25	6	0	0	0	0	-0.07	0	0	0	0	0	-16.69	2.83	19.52
nipsnap3a	6	0	0	0	0	0	-1.45	0	0	0	0	-34.82	-15.3	19.52
rpl7	5	43.77	163.55	28.44	67.61	10.26	15.46	9.57	72.67	0	0	-19.51	0	19.51
fmr1	6	-0.12	0	0	0	-5.39	0	0	0	0	0	-66.93	-47.43	19.5
zgc:101583	6	0	0	0	-0.01	0	0	0	0	0	0	-22.28	-2.82	19.46
kdelr2a	6	0	0	0	0	0	0	0	0	0	0	-18.65	0.8	19.45
ndufb7	6	0	4.63	0	-2.66	0	0	0	0	0	0	-24.06	-4.66	19.4
pgm1	6	0.54	0	0	0	-2.61	0	0	0	0	0	-19.39	0	19.39
hsdl2	6	-4.66	0	0	-1.36	0	0	0	0	0	0	-24.77	-5.42	19.35
gnmt	6	-2.45	0	0	-7.83	-2.29	0	0	0	0	0	-25.31	-5.98	19.33
rabl6b	6	0	0	0	0	0	0	0	0	0	0	-20.73	-1.41	19.32
eef2k	6	0	0	0	0	-0.04	0	0	0	0	0	-25.44	-6.15	19.29
serinc1	6	-23.23	0	0	-9.96	0	0	0	-1.03	0	0	-26.74	-7.45	19.29
ppp1r14aa	12	0	0	0	0	0	0	0	0	0	0	0	19.21	19.21
si:zfos-2326c3.2	6	0	-6.28	0	0	0	0	0	0	0	0	-23.38	-4.17	19.21
btr31	6	0	0	0	0	0	0	0	0	0	0	-23.69	-4.49	19.2
selenoj	6	-0.82	0	0	0	0	0	0	0	0	0	-26.74	-7.54	19.2
eif3hb	6	0	0	0	0	0	0	0	0	0	0	-18.96	0.23	19.19
slc7a3a	12	0	0	0	0	0	0	0	0	0	0	28.17	47.35	19.18
usp36	6	0	0	0	0	0	0	0	0.96	0	0	-19.18	0	19.18
supt4h1	6	-14.63	0	0	-6.31	-6.16	-2.59	0	0	0	0	-32.16	-12.98	19.18
csrp1a	6	0	0	0	0	0	-1.31	0	0	0	0	-32.96	-13.79	19.17
sgsm3	6	0	0	0	0	0	0	0	0	0	0	-24.55	-5.39	19.16
zgc:77112	12	-7.21	-1.4	-2.26	-5.41	-2.48	-7.52	0	-10.79	0	0	-9.67	9.49	19.16
bbip1	6	0	0	0	0	0	0	0	0	0	0	-22.1	-2.99	19.11
pin4	6	0	0	0	0	0	0	0	0	0	0	-21.03	-1.99	19.04
gga1	6	-0.39	0	0	0	0	0	0	0	0	0	-19.04	0	19.04
rab11fip4b	6	0	0	0	0	0	0	0	2.67	0	0	-19.04	0	19.04
gpatch11	6	0	0	0	-4.31	0	-0.31	0	0	0	0	-29.19	-10.19	19
znf451	6	0	0	0	0	0	0	0	0	0	0	-25	-6	19
emc3	6	0	0	0	0	0	0	0	0	0	0	-18.99	0	18.99
xkr9	6	0	0	0	-7.19	0	0	0	-12.91	0	0	-18.98	0	18.98
zgc:153733	6	0.78	0	0	0	0	0	0	0	0	0	-18.97	0	18.97
nsfl1c	6	0	0	0	-3.99	0	-8.12	0	0	0	0	-35.89	-16.96	18.93
psmd8	6	6.66	0	0	-1.7	0	-2.07	0	0	0	0	-37.37	-18.45	18.92
sntb2	6	0	0	0	0	0	0	0	0	0	0	-25.88	-6.97	18.91
scpep1	13	-184.99	5.54	-21.36	-13.36	0	0	0	0	0	0	-35	-16.1	18.9
ormdl2	6	0	0	0	0	0	0	0	0	0	0	-18.89	0	18.89
mycbp	6	0	0	0	0	0	0	0	0	0	0	-17.63	1.24	18.87
atp10a	6	0	0	0	0	0	0	0	0	0	0	-32.1	-13.24	18.86
pcnp	6	4.78	0	0	0.8	0	0	0	0	0	0	-18.86	0	18.86
ciapin1	6	0	0	0	-0.54	0	0	0	0	0	0	-24.24	-5.4	18.84
ppp6r3	6	0	0	0	0	0	0	0	0	0	0	-22.89	-4.06	18.83
sod1	5	0	18.09	0	0	0	0	0	13.66	0	0	-18.82	0	18.82
actr3	6	0	0	0	0	0	0	0	0	0	0	-18.8	0	18.8
fzr1a	6	-4.23	0	0	0	0	0	0	0	0	0	-18.8	0	18.8
rab22a	6	-0.87	0	0	-2.83	0	0	0	0	0	0	-34.89	-16.11	18.78
capns1b	6	5.42	12.17	0	0	1.57	0	1.96	1.11	0	0	-23.15	-4.38	18.77
cox14	6	-10.74	0	0	-11.55	-4.6	-9.45	0	0	0	0	-31.26	-12.51	18.75
map4k5	6	0	0	0	0	-4.33	0	0	0	0	0	-27.96	-9.22	18.74
stx4	6	0	0	0	0	0	0	0	-0.15	0	0	-25.66	-6.92	18.74
SMIM22	12	0	5.22	1.27	0	0	3.54	0	-20.76	0	0	2.56	21.26	18.7
mrps10	6	0	0	0	0	0	0	0	0	0	0	-18.7	0	18.7
pfdn5	6	0	0	0	0	0	0	0	0	0	0	-18.64	0	18.64
cux1b	6	0	0	0	0	0	0	0	0	0	0	-28.35	-9.72	18.63
si:dkey-222f8.3	6	0	2.98	0	-2.68	0	0	0	-1.14	0	0	-18.6	0	18.6
got2a	6	0	0	0	-4.54	0	0	0	0	0	0	-18.59	0	18.59
il16	6	0	0	0	-5.23	-12.91	0	0	-0.76	0	0	-18.57	0	18.57
MED9	6	0	0	0	-0.77	0	-0.4	0	0	0	0	-26.37	-7.81	18.56
MCUR1	6	0	0	0	0	0	0	0	0	0	0	-18.56	0	18.56
pik3r3a	6	-1.51	0	0	-1.67	0	0	0	0	0	0	-31.63	-13.07	18.56
nr1d2a	6	-35.63	0	-5.27	-23.63	-2.52	-3.43	0	0	0	0	-30.4	-11.85	18.55
ncor1	6	0	0	0	0	-0.37	0	0	0	0	0	-27.09	-8.55	18.54
tent4b	6	0	0	0	0	-3.52	0	0	0	0	0	-77.62	-59.09	18.53
pank1b	6	-1.28	0	0	0	0	0	0	0	0	0	-26.12	-7.61	18.51
LECT2	6	0	0	0	2.45	0	0.32	0	0	0	0	-18.23	0.27	18.5
sptan1	6	0	0	0	0	0	0	0	0	0	0	-26.96	-8.49	18.47
laptm4a	6	-5.98	0	0	-2.06	0	-2.13	0	0	0	0	-43.33	-24.89	18.44
ccdc167	6	0	0	0	0	0	0	0	-0.82	0	0	-57.34	-38.91	18.43
mthfd2	6	-6.82	0	0	-7.23	-15.51	-2.24	0	0	0	0	-48.33	-29.9	18.43
rpn1	6	0	0	0	0	0	-2.76	0	0.4	0	0	-23.44	-5.02	18.42
rbmx	6	0	0	0	0	0	0	0	0	0	0	-26.12	-7.72	18.4
spcs1	6	-2.22	2.04	0	0	-2.44	-4.35	0	0	0	0	-25.01	-6.61	18.4
atp5pf	6	-43.68	7.22	-11.33	-62.13	-40.53	-37.6	0	0	0	0	-50.37	-31.97	18.4
gorasp2	6	0	0	0	0	0	0	0	0	0	0	-16.39	2.01	18.4
psma6b	6	0	0	0	-4.55	-2.82	-5.33	0	0	0	0	-49.34	-30.97	18.37
wsb1	6	-24.69	0	0	-3.16	0	0	0	0	0	0	-39.16	-20.87	18.29
psmc1a	6	0	0	0	-5.28	0	-10.3	0	0	0	0	-50.9	-32.62	18.28
arl5a	6	0	0	0	0	0	0	0	0	0	0	-28.66	-10.41	18.25
nadka	6	0	0	0	0	0	0	0	-3.46	0	0	-33.98	-15.73	18.25
rps8a	5	65.61	101.75	42.38	91.23	40.38	61.89	10.59	53.33	0	0	0	18.24	18.24
glipr2	6	0	0	0	0	0	0	0	2.9	0	0	-21.59	-3.47	18.12
STEEP1	6	0	0	0	0	0	0	0	0	0	0	-28.53	-10.44	18.09
rpl13	5	24.36	99.69	24.37	77.21	11.3	22.69	4.14	69.48	0	0	0	18.08	18.08
slmapa	6	0	0	0	0	0	0	0	0	0	0	-18.05	0.01	18.06
adipor2	6	0	0	0	0	0	0	0	-8.98	0	0	-53.75	-35.7	18.05
rin3	6	0	0	0	0	2.13	0	0	0	0	0	-18.03	0	18.03
irf5	6	0	0	0	0	0	-1.59	0	2.38	0	0	-16.29	1.72	18.01
asb8	6	0	0	0	0	0	0	0	0	0	0	-25.03	-7.04	17.99
asah1b	6	-25.03	16.23	0	0	18.96	0	0	0	0	0	-31.45	-13.49	17.96
rps7	5	27.36	159.15	31.51	49.26	7.13	8.96	7.51	67.57	0	0	-17.96	0	17.96
lactb	6	0	0	0	0	0	0	0	0	0	0	-17.95	0	17.95
cd164	6	0	0	0	-8.92	-0.98	0	0	-7.36	0	0	-31.53	-13.61	17.92
psmd3	6	0	0	0	-6.71	-5.35	-15.4	0	0	0	0	-52.75	-34.89	17.86
tmsb4x	5	64.54	113.1	0	0	1.84	0	1.12	16.18	0.59	0	-17.83	0	17.83
rab44	12	8.79	-1.6	0	0	0	0	0	0	0	0	14.72	32.51	17.79
rpl9	5	18.93	59.99	17.88	55.92	14.82	28.53	0.16	52.37	0	0	-17.79	0	17.79
actn1	6	12.26	0	0	0	-4.3	0	0	0	0	0	-25.04	-7.26	17.78
txndc12	6	0	0	0	0	-0.75	0	0	0	0	0	-82.12	-64.34	17.78
camk1db	12	0	0	0	0	-28.28	0	0	0	0	0	9.74	27.51	17.77
tm9sf1	6	0	0	0	-1.03	0	0	0	0	0	0	-33.85	-16.08	17.77
unc13d	6	10.43	-7.33	0	0	0	0	0	-15.5	0	0	-32.64	-14.87	17.77
s1pr4	16	0	0	0	-27.76	-17.83	0	0	0	0	0	-12.41	5.34	17.75
serpine2	6	0	0	0	0	0	0	0	-8.24	0	0	-17.73	0	17.73
polr2b	6	-16.99	0	0	-2.08	0	-0.28	0	0	0	0	-17.72	0	17.72
cops5	6	0	0	0	0	0	0	0	0	0	0	-33.44	-15.73	17.71
dennd2da	6	0	0	0	0	-13.61	0	0	0	0	0	-17.68	0	17.68
ccl34b.9	6	0	0	0	0	-3.88	-3.79	0	-10.21	0	0	-114.8	-97.12	17.68
ell2	6	0	0	0	0	0	0	0	0	0	0	-27.92	-10.26	17.66
taf11	6	-8.64	0	-0.95	-4.82	-0.4	-0.55	0	0	0	0	-32.17	-14.52	17.65
znf1035	6	0	0	0	0	0	0	0	0	0	0	-25.89	-8.24	17.65
jund	6	0	0	0	0	0	0	0	0	0	0	-75.25	-57.61	17.64
zgc:101679	6	0	0	0	0	0	0	0	0	0	0	-47.95	-30.32	17.63
eed	6	0	0	0	0	-1.95	0	0	0	0	0	-17.6	0	17.6
cstf2	6	0	0	0	0	0	0	0	0	0	0	-21.49	-3.89	17.6
CT573342.2	6	-16.74	0	0	-5.22	-8.76	0	0	0	0	0	-17.59	0	17.59
hadhb	6	-9.85	0	-2.01	-30.82	0	-11.99	0	0	0	0	-47.64	-30.06	17.58
lmnb1	6	-4.5	0	0	-0.93	0	0	0	0	0	0	-17.54	0	17.54
tmem263	6	0	0	0	0	-0.5	0	0	0	0	0	-31.8	-14.27	17.53
ncalda	6	0	0	0	0	0	0	0	0	0	0	-17.51	0	17.51
yipf3	6	0	0	0	0	0	0	0	0	0	0	-17.51	0	17.51
slc39a7	6	-11.98	0	0	0	0	-5.91	0	0	0	0	-35.73	-18.22	17.51
cds2	6	0	0	0	-0.34	0	0	0	0	0	0	-17.5	0	17.5
ciarta	6	-5.8	0	0	0	0	0	0	0	0	0	-17.93	-0.43	17.5
pstpip1a	6	0	0	0	0	0	0	0	0	0	0	-18.64	-1.15	17.49
dusp2	6	-10.3	0	0	-7.64	-8.11	-1.45	0	-26.91	0	0	-121.41	-103.92	17.49
erp44	6	0	0	0	0	0	0	0	0	0	0	-17.47	0	17.47
casp22	6	0	0	0	0	0	0	0	0	0	0	-17.16	0.3	17.46
CABZ01109481.1	6	0	0	0	0	0	0	0	0	0	0	-15.7	1.75	17.45
ccnd2a	6	13.96	0	0	0	-2.85	0	0	0	0	0	-17.12	0.33	17.45
ap4s1	6	0	0	0	0	0	0	0	0	0	0	-17.43	0	17.43
eif3d	6	-0.28	2.39	0	0	0	0.45	0	0	0	0	-17.42	0	17.42
fam133b	6	0	0	0	0	0	0	0	0	0	0	-17.35	0.07	17.42
rassf2b	6	0	0	0	0	0	0	0	0	0	0	-17.4	0	17.4
cog4	6	0	0	0	0	0	0	0	0	0	0	-17.39	0	17.39
fbxo34	6	-0.18	0	0	0	0	0	0	0	0	0	-27.11	-9.76	17.35
tbc1d10b	6	0	0	0	-3.61	0	0	0	0	0	0	-22.47	-5.17	17.3
coq9	6	0	0	0	0	0	0	0	0.87	0	0	-17.29	0	17.29
ddi2	6	0	0	0	0	0	0	0	0	0	0	-29.18	-11.89	17.29
tram1	12	21.16	5.69	1.79	16	0	0	0	2.22	0	0	0	17.29	17.29
wdr33	6	0	0	0	0	0	0	0	0	0	0	-23.91	-6.64	17.27
mrpl32	6	0	0	0	0	0	0	0	0	0	0	-24.5	-7.37	17.13
hlx1	6	0	0	0	-5.31	-5.89	0	0	0	0	0	-51.14	-34.04	17.1
slc48a1b	6	-3.75	0	0	0	0	0	0	0	0	0	-17.09	0	17.09
apaf1	6	0	0	0	0	0	0	0	0	0	0	-17.08	0	17.08
si:ch211-244b2.4	6	-1.2	0	0	-1.93	-0.24	-3.37	0	0	0	0	-82.36	-65.3	17.06
jakmip1	6	-3.11	0	0	0	-10.57	0	0	0	0	0	-17.06	0	17.06
smim19	6	0	0	0	0	0	0	0	0	0	0	-26.56	-9.51	17.05
ap2b1	6	0	0	0	0	0	0	0	0	0	0	-30.31	-13.27	17.04
ndufb10	6	0	1.31	0	-5.27	0	-1.9	0	0	0	0	-20.86	-3.82	17.04
arpc5a	6	0	0	0	0	0	0	0	0	0	0	-24.51	-7.49	17.02
usp5	6	0	0	0	-0.92	0	-1.12	0	0	0	0	-17.02	0	17.02
ogt.1.1	6	0	0	0	0	0	0	0	0	0	0	-16.98	0	16.98
znf217	6	0	0	0	0	-7.86	0	0	0	0	0	-35.22	-18.24	16.98
psmd4b	6	0	0	0	-3.99	0	-5.39	0	0	0	0	-54.16	-37.19	16.97
uri1	6	0	0	0	0	0	0	0	0	0	0	-14.43	2.53	16.96
hmg20b	6	0	0	0	-4.4	0	0	0	0	0	0	-23.07	-6.12	16.95
ccl34b.8	6	-8.11	0	-4.4	-22.32	0	-30.73	0	0	0	0	-155.14	-138.19	16.95
gig2j	6	0	0	0	0	0	0	0	0	0	0	-16.92	0	16.92
aff4	6	0	0	0	0	0	0	0	0	0	0	-15.68	1.24	16.92
arl8a	6	0	0	0	0	0	0	0	0	0	0	-23.85	-6.95	16.9
oxsr1a	6	7.56	0	0	0	0	0	0	0	0	0	-14.45	2.43	16.88
ssr2	5	11.97	37.92	3.97	15.89	0.23	0	0	14.29	0	0	-16.86	0	16.86
pip5k1bb	6	0	0	0	0	0	0	0	0	0	0	-43.28	-26.47	16.81
blzf1	6	0	0	0	0	0	0	0	0	0	0	-16.81	0	16.81
eno3	5	0	36.58	0	-0.38	0	0	0	0	0	0	-6.71	10.09	16.8
srp72	6	0	0	0	0	0	0	0	0	0	0	-16.78	0	16.78
tap1	6	0	0	0	0	0	0	0	0	0	0	-16.77	0	16.77
eef1b2	5	5	132.61	15.8	34.23	23.64	18.52	8.24	60.93	0	0	-16.76	0	16.76
eif3ea	5	0	52.29	3.38	10.88	0	12.02	0	20.77	0	0	-18.79	-2.04	16.75
cul2	6	0	0	0	0	0	0	0	0	0	0	-21.01	-4.27	16.74
arih2	6	0	0	0	0	0	0	0	0	0	0	-26.24	-9.51	16.73
f5	6	0	0	0	-30.18	-31.3	0	0	-2.67	0	0	-69.33	-52.6	16.73
antkmt	6	0	0	0	0	0	0	0	-2.21	0	0	-16.72	0	16.72
stard8	6	-51.18	0	-16.37	-14.84	-3.58	-0.82	0	-11.33	0	0	-49.34	-32.64	16.7
mrps18c	6	0	0	0	-1.43	0	-0.06	0	0	0	0	-19.62	-2.93	16.69
si:ch1073-429i10.1	6	0	0	0	0	0	0	0	0	0	0	-16.69	0	16.69
taf9	6	0	0	0	-0.55	-9.84	0	0	0	0	0	-34.72	-18.03	16.69
dad1	6	-0.43	6.67	0	-0.55	0	-16.24	0	0	0	0	-24.12	-7.46	16.66
ahcy	5	-4.76	16.5	2.83	0	0	0	0	12.56	0	0	-16.64	0	16.64
rpl23	5	0	125.57	10.87	12.96	0	0.88	1.72	54.28	0	0	-16.64	0	16.64
tmed2	6	0	2.11	0	0	0	0	0	0	0	0	-16.61	0	16.61
magt1	6	5.67	8.37	0	0	0	0	0	0	0	0	-16.6	0	16.6
synj1	6	0	0	0	0	0	0	0	0	0	0	-18.4	-1.81	16.59
bloc1s1	6	0	0	0	0	0	0	0	0	0	0	-23.48	-6.91	16.57
idh3b	6	-0.66	0	0	-12.13	-1.33	-5.84	0	0	0	0	-26.26	-9.7	16.56
sub1a	6	0	1.09	0	0	0	-1.31	0	0.07	0	0	-21.32	-4.78	16.54
snrnp27	6	-60.93	0	-1.47	-18.79	-1.23	-3.23	0	-8.3	0	0	-25.89	-9.36	16.53
uso1	6	0	0	0	0	0	0	0	0	0	0	-22.68	-6.17	16.51
selenot2	6	0	0	0	0	0	-0.86	0	0	0	0	-16.49	0	16.49
ubqln4	6	0	0	0	-0.37	0	0	0	0	0	0	-26.38	-9.93	16.45
C8H5orf51	6	0	0	0	0	0	0	0	0	0	0	-16.42	0	16.42
hsd3b7	6	0	0	0	-9.23	-13.75	0	0	-10.54	0	0	-60.54	-44.16	16.38
sf3b3	6	-23.6	0	-2.51	-21.76	-4.69	-4.6	0	0	0	0	-41.27	-24.89	16.38
aldh1l1	6	0	0	0	0	0	0	0	0.97	0	0	-16.37	0	16.37
irak3	6	3.24	0	0	2.82	0	0	0	0.56	0	0	-33.92	-17.55	16.37
adipor1b	6	0.95	0	0	0	0	0	0	0	0	0	-12.54	3.82	16.36
ap2m1a	6	0	11.42	0	-3.92	0	-2.76	0	0	0	0	-34.57	-18.22	16.35
hikeshi	6	-4.04	0	0	0	-1	0	0	0	0	0	-16.35	0	16.35
fbxo45	6	0	0	0	0	0	0	0	0	0	0	-16.34	0	16.34
cs	6	0	0	0	-22.74	0	-1.43	0	-2.36	0	0	-41.27	-24.94	16.33
uqcr10	6	-11.39	0	-0.92	-56.23	-24.49	-27.68	0	0	0	0	-59.11	-42.8	16.31
cdk2ap2	6	-9.46	0	0	-2.27	0	-2.26	0	0	0	0	-16.31	0	16.31
bin3	6	0	0	0	0	0	0	0	0	0	0	-21.26	-4.96	16.3
rpl18	5	30.31	115.84	19.51	67.71	11.57	27.14	8.91	56.12	0	0	-16.3	0	16.3
eif1ad	6	0	0	0	0	0	0	0	0	0	0	-16.28	0	16.28
ano10a	6	0	0	0	0	0	0	0	0	0	0	-16.26	0	16.26
hvcn1	12	0.67	0	0	0	0	0	0	0	0	0	0	16.25	16.25
cyth1b	6	-4.06	0	0	0	0	0	0	0	0	0	-26.83	-10.67	16.16
tmem199	6	0	0	0	-8.51	0	-4.37	0	-6.28	0	0	-57.26	-41.1	16.16
pias4a	6	0	0	0	0	0	0	0	0	0	0	-19.48	-3.33	16.15
zgc:113411	6	0	0	0	0	0	0	0	0	0	0	-35.87	-19.75	16.12
arhgap27l	6	0	0	0	0	0	0	0	0	0	0	-18.11	-2	16.11
cgrrf1	6	0	0	0	0	0	0	0	0	0	0	-28.3	-12.2	16.1
GCNT4	6	0	0	0	0	0	0	0	0	0	0	-31.59	-15.49	16.1
hdac3	6	-1.05	0	0	-1.88	-1.23	0	0	0	0	0	-19.22	-3.12	16.1
CTBP1	6	6.57	0	0	0	0	0	0	1.33	0	0	-16.07	0	16.07
ctbp1	6	6.57	0	0	0	0	0	0	1.33	0	0	-16.07	0	16.07
pgam5	6	0	0	0	0	0	0	0	0	0	0	-16.07	0	16.07
si:dkey-261j15.2	6	0	0	0	0	0	0	0	0	0	0	-16.07	0	16.07
pdap1b	6	-3.01	0	0	-4.66	-5.65	-5.83	0	0	0	0	-41.72	-25.66	16.06
pfn1	5	54.16	136.02	4	0.54	0	0	7.37	0	0	0	-8.37	7.69	16.06
zmp:0000000924	6	0	0	0	0	0	0	0	0	0	0	-17.17	-1.12	16.05
psmc4	6	0	0	0	-3.6	0	-3.49	0	0	0	0	-34.38	-18.34	16.04
exosc3	6	0	0	0	0	0	0	0	0	0	0	-16.01	0	16.01
slco3a1	6	0	0	0	0	0	0	0	0	0	0	-31.69	-15.68	16.01
babam2	6	-5.21	0	0	-0.67	0	0	0	0	0	0	-22.22	-6.22	16
cstf1	6	-1.51	0	0	0	0	0	0	0	0	0	-26.69	-10.7	15.99
eif2ak2	6	0	0	0	0	0	0	0	0	0	0	-73.58	-57.6	15.98
gnptg	6	0	0	0	0	0	0	0	0	0	0	-15.97	0	15.97
prkag1	6	0	0	0	-1.28	-1.06	0	0	0	0	0	-33.26	-17.3	15.96
casp7	6	-2.08	0	0	0	0	0	0	0	0	0	-56.42	-40.47	15.95
egr3	6	0	0	0	0	0	0	0	-0.08	0	0	-73.56	-57.64	15.92
chchd7	6	0	0	0	0	0	-2.69	0	0	0	0	-30.62	-14.74	15.88
si:ch211-171h4.5	6	0	0	0	-1.27	-2.24	0	0	0	0	0	-18.1	-2.22	15.88
pik3cg	6	-6.12	0	0	-13.08	-9	0	0	-0.46	0	0	-54.97	-39.15	15.82
si:ch73-265h17.1	6	0	0	0	0	0	0	0	0	0	0	-18.63	-2.82	15.81
per3	6	-5.71	0	0	0	0	0	0	0	0	0	-22.5	-6.74	15.76
naa38	6	0	0	0	0	0	0	0	0	0	0	-20.56	-4.8	15.76
ncoa6	6	0	0	0	0	0	0	0	0	0	0	-15.73	0	15.73
inpp4aa	6	0	0	0	0	0	0	0	0	0	0	-19.58	-3.86	15.72
npepl1	6	-11.01	0	0	0	1.06	0	0	0	0	0	-15.71	0	15.71
def6a	6	0	0	0	-6.27	-5.4	0	0	0	0	0	-15.69	0	15.69
cox4i1	5	-34.18	38.89	0	-30.19	0	-14.83	0	0	0	0	-25.27	-9.67	15.6
gtf2f1	6	0	0	0	0	0	0	0	0	0	0	-13.95	1.65	15.6
pde4ca	6	0	0	0	0	0	0	0	0	0	0	-28.81	-13.21	15.6
si:ch211-137j23.6	6	0	0	0	0	0	0	0	0	0	0	-17.58	-1.98	15.6
apooa	6	-5.38	0	0	-12.62	-2.29	-13.28	0	0	0	0	-15.57	0	15.57
wwp2	6	-0.01	0	0	0	0	0	0	0	0	0	-15.06	0.51	15.57
yeats4	6	0	0	0	0	0	0	0	0	0	0	-19.85	-4.29	15.56
uqcrq	6	-72.48	0	-5.05	-78.5	-51.76	-34.87	0	0	0	0	-42.17	-26.62	15.55
tor1	6	-4.61	0	0	-2.47	0	0	0	0	0	0	-16.71	-1.18	15.53
med12	6	0	0	0	0	0	0	0	0	0	0	-28.99	-13.46	15.53
irf2bp2b	6	-14.86	0	0	0	0	0	0	0	0	0	-14.65	0.87	15.52
srsf6b	6	-0.14	0	0	0	0	-1.17	0	0	0	0	-27.04	-11.53	15.51
BX248113.1	6	-5.37	0	0	-0.61	0	0	0	-2.21	0	0	-39.76	-24.26	15.5
tpst1	6	0	0	0	-6.98	-6.7	0	0	0	0	0	-15.49	0	15.49
sap18	6	0	0	0	0	0	0	0	0	0	0	-17.66	-2.18	15.48
lamtor5	6	-41.92	0	-0.95	-14.48	0	-5.23	0	0	0	0	-88.49	-73.03	15.46
atp6v1f	6	-25.1	0	-4.26	-8.99	0	-0.32	0	0	0	0	-36.19	-20.74	15.45
scarb2a	6	0	0	0	0	2.36	0	0	0	0	0	-22.5	-7.06	15.44
ap5s1	6	7.34	0	0	0	0	0	0	0	0	0	-13.77	1.66	15.43
si:ch211-243a20.4	13	-29.02	0	-2.9	-21.75	0	-2.24	0	-2.44	0	0	-15.41	0	15.41
npepps	6	10.79	0	0	0	0	0	0	0	0	0	-15.38	0	15.38
rps6ka3a	6	0	0	0	0	0	0	0	0	0	0	-25.23	-9.85	15.38
pcbp2	6	0	0	0	0	0	0	0	0	0	0	-20.76	-5.39	15.37
fundc1	6	0	0	0	0	0	0	0	0	0	0	-24.02	-8.71	15.31
rps27l	6	-25.41	2.82	0	0	0	0	0	0	0	0	-15.27	0	15.27
acsl3b	6	0	0	0	0	0	0	0	0	0	0	-15.25	0	15.25
xpnpep2	6	3.35	0	4.47	0	0	0	0	4.76	0	0	-16.23	-0.98	15.25
im:7154036	6	-6	0	0	0	-0.62	0	0	0.3	0	0	-20.74	-5.5	15.24
selenop	7	186.43	69.59	55.76	185.21	87.54	79.16	23.75	56.85	0	0	54.67	69.88	15.21
sdhdb	6	0	0	0	-8.61	0	-8.47	0	0	0	0	-30.84	-15.65	15.19
card11	6	-5.84	0	0	0	0	0	0	0	0	0	-86.05	-70.87	15.18
fli1b	6	0	0	0	-0.08	-6.39	0	0	0	0	0	-15.16	0	15.16
dync1li2	6	2.9	0	0	0	0	0	0	0	0	0	-18.58	-3.46	15.12
fkbp1aa	6	21.72	0.88	0	0	0.02	0	0	0	0	0	-31.34	-16.23	15.11
rpl4	8	0	0	0	6.99	0	9.42	0	11.56	0	0	0	15.1	15.1
med13b	6	0	0	0	-0.97	0	0	0	0	0	0	-15.06	0	15.06
polr2c	6	0	0	0	-0.72	-6.71	0	0	0	0	0	-24.13	-9.09	15.04
fam199x	6	0	0	0	0	0	0	0	0	0	0	-13.15	1.87	15.02
ralgapa2	6	0	0	0	0	0	0	0	0	0	0	-11.75	3.24	14.99
si:ch211-13c6.2	6	0	0	0	0	0	0	0	0	0	0	-14.98	0	14.98
nap1l4b	6	5.46	0	0	0	0	0	0	0	0	0	-13.55	1.4	14.95
rnf7	6	0	0	0	0	0	0	0	0	0	0	-17.87	-2.92	14.95
tpd52l2a	6	-7.68	0	0	0	0	0	0	0	0	0	-20.23	-5.28	14.95
zfyve27	6	0	0	0	0	0	0	0	0	0	0	-14.94	0	14.94
setdb1b	6	0	0	0	0	0	-1.36	0	0	0	0	-19.03	-4.13	14.9
exoc7	6	0	0	0	0	0	0	0	0	0	0	-14.87	0	14.87
fbxo9	6	0	0	0	0	0	0	0	0	0	0	-14.87	0	14.87
prkcaa	6	3.11	0	0	0	0	0	0	0	0	0	-14.87	0	14.87
zdhhc5b	6	0	0	0	0	0	0	0	0	0	0	-14.86	0	14.86
kpnb1	6	4.35	0	0	0	-1.85	0	0	0	0	0	-22.79	-7.94	14.85
ttc1	6	5.72	0	0	0	0	0	0	0	0	0	-14.83	0	14.83
rnf181	6	0	0	0	0	0	-1.87	0	0	0	0	-39.41	-24.6	14.81
exoc1	6	0	0	0	0	0	0	0	0	0	0	-25.27	-10.47	14.8
psd3l	6	0	0	0	0	0	0	0	0	0	0	-25.4	-10.64	14.76
mtmr8	6	0	0	0	0	0	0	0	0	0	0	-14.97	-0.22	14.75
slc35a4	6	0	0	0	0	0	0	0	0	0	0	-26.48	-11.75	14.73
bnip3lb	6	0	0	0	0	0	0.39	0	0	0	0	-14.71	0	14.71
nfyba	6	-1.54	0	0	0	-1.56	0	0	0	0	0	-32.68	-17.99	14.69
dhx8	6	-2.55	0	0	-2.71	-0.38	-0.18	0	0	0	0	-13.71	0.97	14.68
si:ch211-11p18.6.1	6	0	0	0	0	-1.83	0	0	0	0	0	-14.66	0	14.66
hbegfa	17	0	0	0	-14.84	-25.71	-1.85	0	-0.9	0	0	-6.59	8.06	14.65
ttc7b	6	-0.69	0	0	-0.48	0	0	0	0	0	0	-14.63	0	14.63
scinlb	10	-27.13	-1.49	-16.72	-46.79	-9.93	-20.17	-0.33	-50.7	0	0	-14.61	0	14.61
tomm20b	5	0	19.74	0	0	0	0	0	0	0	0	-14.6	0	14.6
ybx1	5	1.52	41.94	2.17	2.63	9.58	0	2.34	50.35	0	0	0	14.6	14.6
cdk13	6	0	0	0	0	0	0	0	0	0	0	-14.57	0	14.57
rflna	12	0	0	0	0	0	0	0	0	0	0	0	14.57	14.57
rnf121	6	0	0	0	-1.35	0	-4.1	0	0	0	0	-29.9	-15.33	14.57
atp5f1d	6	-1.77	13.41	0	-25.86	-11.74	-16.59	0	1.83	0	0	-22.36	-7.81	14.55
zc3h4	6	0	0	0	-0.02	0	0	0	0	0	0	-17.93	-3.39	14.54
dpm1	6	0	0	0	0	0	0	0	0	0	0	-12.66	1.86	14.52
rock2a	6	1.3	0	0	0	0	0	0	0	0	0	-13.59	0.92	14.51
dedd1	6	-12.21	0	0	-4.01	-1.01	0	0	1.63	0	0	-13.7	0.79	14.49
tmub1	6	1.5	0	0	0	0	0	0	0	0	0	-17.9	-3.42	14.48
dcaf7	6	-6.62	0	0	-1.67	-1.42	0	0	0	0	0	-30.21	-15.74	14.47
sart1	6	-28.66	0	0	-17.16	0	-1.56	0	0	0	0	-20.03	-5.58	14.45
tprb	6	0	0	0	0	0	0	0	0	0	0	-19.38	-4.95	14.43
zc4h2	6	0	0	0	0	0	0	0	0	0	0	-20.46	-6.05	14.41
clptm1l	6	0	0	0	0	0	0	0	0	0	0	-14.4	0	14.4
spice1	6	0	0	0	0	-2.75	0	0	0	0	0	-14.4	0	14.4
psmc5	6	0	0	0	-1.34	0	-8.61	0	0	0	0	-37.81	-23.42	14.39
suds3	6	0	0	0	0	0	0	0	0	0	0	-17.58	-3.19	14.39
zgc:92335	6	-3.98	0	0	-0.61	0	0	0	0	0	0	-21.1	-6.72	14.38
cox10	6	0	0	0	0	-1.16	-0.81	0	0	0	0	-14.38	0	14.38
ptpn22	6	0	0	0	0	0	0	0	0	0	0	-14.38	0	14.38
CABZ01088134.1	6	-86.93	1.46	-20.67	-51.77	-4.66	-20.42	0	4.61	0	0	-185.93	-171.59	14.34
ssr4	5	19.91	21.03	0	3.73	0	0	0	15.39	0	0	-14.31	0	14.31
gosr1	6	-1.45	0	0	0	0	0	0	0	0	0	-21.96	-7.66	14.3
capza1b	11	53.93	0.32	1.72	0	0	0	0	0	0	0	-10.45	3.84	14.29
anapc11	6	0	0	0	0	0	0	0	0	0	0	-14.28	0	14.28
slc25a20	6	1.89	0	0	0	0	0	0	0	0	0	-16.63	-2.36	14.27
CU571315.1	6	0	0	0	0	0	0	0	0	0	0	-14.25	0	14.25
ugt2a4	11	24.14	0	0	0	0	0	0	0	0	0	-17.18	-2.93	14.25
naca	5	2.44	99.69	15.69	34.77	17.18	26.73	11.16	55.73	0	4.82	6.9	21.15	14.25
BX649411.2	6	0	0	0	0	0	0	0	0	0	0	-14.21	0	14.21
acadl	6	0	0	0	0	0	0	0	0	0	0	-14.17	0	14.17
snx4	6	0	0	0	-2	0	0	0	0	0	0	-32.97	-18.8	14.17
kdm4b	6	0	0	0	0	0	0	0	0	0	0	-14.16	0	14.16
cmtm7	6	0	0	0	0	0	0	0	0	0	0	-14.14	0	14.14
madd	6	0	0	0	0	0	0	0	0	0	0	-11.8	2.32	14.12
elob.1	6	0	0	0	0	0	0	0	0	0	0	-15.93	-1.85	14.08
golga7	6	-4.13	0	0	0	0	0	0	0	0	0	-14.82	-0.75	14.07
RASGRP2	6	0	0	0	0	0	0	0	0	0	0	-14.07	0	14.07
rasgrp2	6	0	0	0	0	0	0	0	0	0	0	-14.07	0	14.07
mphosph8	6	0	0	0	0	0	0	0	0	0	0	-17.57	-3.51	14.06
pip4k2ca	6	0	0	0	0	0	0	0	0	0	0	-12.46	1.6	14.06
zbtb8os	6	0	0	0	0	0	0	0	0	0	0	-20.16	-6.1	14.06
mdh2	5	-11.53	10.54	0	-8.04	0	0	0	5.78	0	0	-20.54	-6.48	14.06
abca2	6	0	0	0	0	0	0.42	0	0	0	0	-14.05	0	14.05
mrpl24	6	0	0	0	0	0	-1.6	0	0	0	0	-12.72	1.33	14.05
azin1b	6	-0.02	0	0	0	0	0	0	0	0	0	-26.46	-12.42	14.04
sec11a	6	10.04	3.85	0	0	0	0	0	5.51	0	0	-17.08	-3.04	14.04
cox6a2	12	0	0	0	0	-1.39	0	0	-13.25	0	0	0	14.02	14.02
nktr	6	-15.05	0	0	-1.06	-9.81	0	0	0	0	0	-16.63	-2.61	14.02
ndufs5	6	0	0	0	-19.79	-5.67	-10.59	0	0	0	0	-27.12	-13.12	14
cxcr1	10	-58.05	-21.62	0	-13.5	-12.12	0	0	-87.51	0	0	6.69	20.69	14
mfsd2ab	6	-13.15	0	0	0	0	0	0	-21.21	0	0	-27.96	-13.98	13.98
ythdf1	6	0	0	0	0	0	0	0	0	0	0	-21.16	-7.18	13.98
tnfaip8l2b	6	0	0	0	0	-0.77	0	0	0	0	0	-38.77	-24.81	13.96
tmem30ab	10	-2.82	0	0	-3.89	-3.32	0	0	-28.1	0	0	-13.96	0	13.96
fkbp5	6	-2.78	0	0	-15.65	-1.19	-7.8	0	0	0	0	-46.76	-32.83	13.93
gpr183b	6	0	0	0	0	0	0	0	0	0	0	-13.93	0	13.93
cnot6a	6	0	0	0	0	0	0	0	0	0	0	-17.02	-3.1	13.92
osbp2	11	17.23	0	3.02	10.76	13.98	9.58	0	0	0	0	-13.9	0	13.9
OSBP2	11	17.23	0	3.02	10.76	13.98	9.58	0	0	0	0	-13.9	0	13.9
vamp3	6	-37.92	2.41	-0.59	-8.82	0	0	0	0	0	0	-19.27	-5.39	13.88
si:ch73-199g24.2	6	-4.24	0	-2.04	-7.17	0	-0.85	0	0	0	0	-10.99	2.88	13.87
cops7a	6	0	0	0	0	0	0	0	0	0	0	-19.23	-5.38	13.85
trappc4	6	0	0	0	-2.43	0	-0.5	0	0	0	0	-28.05	-14.2	13.85
si:dkey-17o15.2	6	0	0	0	0	0	0	0	0	0	0	-11.65	2.19	13.84
tnfb	6	-84.71	-2.44	-12.43	-38.08	-11.57	-12.22	0	-32.66	0	0	-123.16	-109.33	13.83
atp5mc1	6	0	4.11	-2.76	-23.38	0	-30.22	0	0	0	0	-37.8	-23.98	13.82
abhd4	6	-7.23	0	0	-0.69	0	0	0	-1.57	0	0	-28.21	-14.4	13.81
TOM1L2	6	0	0	0	0	0	0	0	0	0	0	-16.06	-2.25	13.81
tom1l2	6	0	0	0	0	0	0	0	0	0	0	-16.06	-2.25	13.81
zgc:101783	6	0	0	0	0	0	0	0	0	0	0	-22.27	-8.46	13.81
zmp:0000000912	6	-4.61	0	0	0	-4.43	-5.09	0	0	0	0	-116.91	-103.12	13.79
fam126a	6	-3.1	0	0	0	0	0	0	0	0	0	-20.64	-6.86	13.78
mapk14a	6	-7.97	0	0	-5.45	0	0	0	0	0	0	-15.84	-2.07	13.77
aldh9a1a.1	5	6.31	28.55	11.3	22.5	11.37	26.47	1.51	21.85	0	0	2.46	16.22	13.76
arid1aa	6	0	0	0	0	0	0	0	0	0	0	-13.75	0	13.75
zgc:194246	6	0	0	0	-2	0	0	0	0	0	0	-13.75	0	13.75
gps1	6	0	0	0	0	0	0	0	0	0	0	-13.71	0	13.71
preb	6	0	0	0	0	0	0	0	0	0	0	-24.27	-10.57	13.7
scp2a	6	0	0	0	0	0	0	0	0	0	0	-13.7	0	13.7
hadhab	6	0	0	0	0	0	0	0	0	0	0	-21.05	-7.37	13.68
map3k4	6	5.72	0	0	0	0	0	0	0	0	0	-11.3	2.36	13.66
safb	6	0	0	0	0	0	0	0	0	0	0	-13.26	0.38	13.64
pip4k2aa	6	0	0	0	0	0	0	0	-5.43	0	0	-16.15	-2.51	13.64
xrn1	6	-3.76	0	0	-3.59	0	0	0	0	0	0	-19.41	-5.79	13.62
eif4a1b	5	0	16.83	0	10.04	9.14	10.42	0.8	10.4	0	0	-13.61	0	13.61
mtpn	6	-0.53	0	0	0	-2.86	-3.34	0	0	0	0	-14.13	-0.53	13.6
gys1	6	0.52	0	0	0	0	0	0	0	0	0	-38.59	-25.06	13.53
actl6a	6	0	0	0	0	0	0	0	0	0	0	-28.85	-15.32	13.53
pik3r5	6	0	0	0	0	0	0	0	0	0	0	-43.1	-29.57	13.53
bri3	6	-1.34	0	0	0	0.23	0	0	-12.59	0	0	-13.02	0.51	13.53
dcp2	6	0	0	0	0	-0.6	0	0	0	0	0	-13.52	0	13.52
lpcat3	6	0	0	0	0	0	0	0	0	0	0	-16.07	-2.56	13.51
reep3b	6	1.56	0	0	0	0	0	0	0	0	0	-16.11	-2.6	13.51
ckbb	5	17.96	48.57	4.47	42.04	36.65	0	6.61	59.58	0	0	-13.5	0	13.5
stxbp2	6	0	0	0	-1.61	0	0	0	-0.32	0	0	-29.36	-15.88	13.48
si:dkey-118j18.2	6	0	0	0	0	0	0	0	0	0	0	-28.27	-14.8	13.47
pde7a	6	-3.73	0	0	0	0	0	0	0	0	0	-13.43	0	13.43
igf2bp2b	6	3.25	0	0	0	0	0	0	0	0	0	-36.78	-23.36	13.42
polr2i	6	0	0	0	0	0	0	0	0	0	0	-18.36	-4.95	13.41
mrps7	6	0	0	0	-0.37	0	0	0	0	0	0	-20.88	-7.49	13.39
si:dkey-172j4.3	6	0	0	0	-15.98	-11.19	-5.51	0	0	0	0	-53.17	-39.8	13.37
pxna	6	-2.38	0	0	-4	-3.9	0	0	-11.42	0	0	-14.3	-0.93	13.37
CIR1	6	-1.15	0	0	0	0	0	0	0	0	0	-17.95	-4.6	13.35
aup1	6	0	0	0	0	0	0	0	0	0	0	-13.34	0	13.34
eif2s3	5	-6.9	15.52	0	0	0	1.36	0	0	0	0	-13.34	0	13.34
taf10	6	-12.63	0	0	-9.97	-0.7	-6.45	0	0	0	0	-31.12	-17.79	13.33
exoc6	6	0	0	0	0	-1.08	0	0	0	0	0	-13.31	0	13.31
oser1	6	-0.16	0	0	0	0	0	0	0	0	0	-19.32	-6.02	13.3
ptpn23a	6	0	0	0	0	0	0	0	0	0	0	-13.29	0	13.29
trim8b	6	-1.67	0	0	0	0	0	0	0	0	0	-25.19	-11.91	13.28
cyp20a1	6	0	0	0	0	0	0	0	0	0	0	-17.72	-4.45	13.27
si:dkey-58f10.11	6	0	0	0	0	0	0	0	1.29	0	0	-13.2	0.07	13.27
rnf20	6	0	0	0	0	0	0	0	0	0	0	-13.13	0.12	13.25
anxa11a	6	0	0	0	0	0	0	0	-6.41	0	0	-41.94	-28.69	13.25
uqcrc1	6	-7.75	0.7	0	-26.73	-0.14	-15.16	0	0	0	0	-47.27	-34.03	13.24
taf7	6	0	0	0	0	0	0	0	0	0	0	-21.35	-8.14	13.21
b3gnt5b	6	0	0	0	0	0	0	0	0	0	0	-13.18	0	13.18
syne3	6	0	0	0	-0.89	0	0	0	0	0	0	-13.13	0	13.13
tomm34	6	0	0	0	0	0	0	0	0	0	0	-40.05	-26.93	13.12
heatr5a	6	0	0	0	0	0	0	0	0	0	0	-13.11	0	13.11
slc30a1a	6	-66.12	1.48	-0.59	-0.02	0	0	0	0	0	0	-40.51	-27.41	13.1
si:ch211-162e15.3	6	0	0	0	0	0	0	0	0	0	0	-19.85	-6.79	13.06
si:ch211-136m16.8	12	0	-5.03	0	0	0	0	0	-14.89	0	0	0	13.05	13.05
atl3	6	0	0	0	0	0	-1.74	0	0	0	0	-33.2	-20.16	13.04
atg101	6	0	0	0	0	0	0	0	0	0	0	-13.04	0	13.04
si:ch211-226m16.2	12	8.32	0	11.09	34.88	0	10.28	0	3.57	0	0	122.78	135.82	13.04
derl1	6	-2.71	0	0	0	0	-6.81	0	0	0	0	-16.1	-3.09	13.01
slu7	6	0	0	0	0	0	0	0	0	0	0	-11.76	1.24	13
mrpl18	6	0	0	0	-3.91	0	-3.71	0	0	0	0	-15.09	-2.1	12.99
mrpl4	6	0	0	0	0	0	0	0	0	0	0	-12.58	0.38	12.96
gtf2b	6	0	0	0	0	0	0	0	0	0	0	-21.94	-8.99	12.95
pef1	6	-1.8	0	0	0	0	0	0	0	0	0	-58.35	-45.44	12.91
fmo5	6	0	0	0	0	0	0	0	0	0	0	-12.9	0	12.9
ankhd1	6	0	0	0	0	0	-0.03	0	0	0	0	-11.41	1.46	12.87
psmb3	6	-0.6	0	-3.61	-17.24	-21.33	-28.47	0	-1.42	0	0	-87.54	-74.68	12.86
gadd45ga	10	0	6.37	0	0	0	0	0	-32.17	0	0	-14.29	-1.44	12.85
capzb	6	0	0	0	0	0	0	0	0	0	0	-12.83	0	12.83
thy1	12	6.05	-1.09	0	0	0	0	0	-19.01	0	0	0	12.83	12.83
rbm47	6	-9.75	0	0	-3.36	0	0	0	0	0	0	-28.49	-15.66	12.83
osbpl9	6	-4.57	0	0	-2.08	-0.19	0	0	0	0	0	-12.81	0	12.81
cops2	6	0	0	0	0	0	0	0	0	0	0	-12.74	0	12.74
nr4a3	6	12.21	3.69	5.12	15.47	11.2	8.17	0	0	0	0	-36.53	-23.81	12.72
snx5	6	0.91	0	0	0	5.05	0	0	0	0	0	-14.37	-1.65	12.72
gnal	6	0	0	0	0	0	0	0	0	0	0	-9.49	3.22	12.71
si:ch211-188c18.1	12	0	0	0	0	0	0	0	0	0	0	7.57	20.28	12.71
farsa	6	0	0	0	0	0	0	0	0	0	0	-20.97	-8.3	12.67
rad21a	6	-1.07	0	0	-0.91	0	0	0	0	0	0	-21.22	-8.55	12.67
cxcr4b	13	-29.15	0	0	0	0	0	0	0	0	0	13.58	26.22	12.64
cpsf6	6	0	0	0	0	0	0	0	0	0	0	-27.3	-14.67	12.63
bod1	6	0	0	0	0	0	0	0	0	0	0	-24.04	-11.41	12.63
slc2a6	6	-98.58	-9.54	-6.83	-11.58	0	-8.78	0	-6.98	0	0	-82.41	-69.8	12.61
yipf4	6	0	0	0	0	0	0	0	0	0	0	-12.56	0	12.56
sf3b5	6	0	0	0	-7.4	0	-7.19	0	0	0	0	-50.22	-37.71	12.51
gid8b	6	0	0	0	0	0	0	0	0	0	0	-31.79	-19.3	12.49
p2ry13	6	0	0	0	0	0	0	0	-0.09	0	0	-12.17	0.31	12.48
patl1	6	0	0	0	-0.47	0	0	0	0	0	0	-19.41	-6.93	12.48
syne1b	6	0	0	0	0	-5.04	0	0	0	0	0	-29.34	-16.86	12.48
hm13	6	0	0	0	0	0	0	0	0	0	0	-12.47	0	12.47
tpp2	6	0	0	0	0	0	0	0	0	0	0	-20.36	-7.89	12.47
hnrpkl	6	0	0	0	0	0	-0.6	0	0	0	0	-10.31	2.13	12.44
srsf9	6	0	0	0	0	0	0	0	0	0	0	-23.92	-11.48	12.44
mrps26	6	1.37	0	0	0	0	0	0	0	0	0	-12.4	0	12.4
scfd1	6	0	0	0	0	0	0	0	0	0	0	-15.67	-3.27	12.4
psmc3	6	0	0	0	-4.72	-0.6	-4.84	0	0	0	0	-38.29	-25.9	12.39
copg2	6	0	0	0	-2.18	-0.2	0	0	0	0	0	-24.29	-11.92	12.37
tbc1d10c	6	4	0	0	0	0	0	0	0	0	0	-12.37	0	12.37
rps11	5	0	51.78	22.99	20.17	0	11.66	0	40.33	0	0	-12.33	0	12.33
vcp	6	-6.55	0	-3.4	-17.94	-10.78	-16.78	0	-2.18	0	0	-52.05	-39.72	12.33
n4bp1	6	-9.73	-4.49	0	0	0	0	0	0	0	0	-40.71	-28.41	12.3
gosr2	6	1.63	0	0	0	0	0	0	0	0	0	-16.72	-4.44	12.28
usp33	6	0	0	0	0	0	0	0	0	0	0	-19.77	-7.51	12.26
asb12a	6	0	0	0	0	0	0	0	0	0	0	-19.36	-7.11	12.25
mical1	6	0	0	0	0	-5.73	0	0	-16.7	0	0	-15.91	-3.67	12.24
rpl6	8	0	0	2.73	12.98	0	24.46	0	12.47	0	0	0	12.24	12.24
tank	6	-7.54	0	0	0	0	-0.31	0	0	0	0	-32.12	-19.89	12.23
mgat5	6	0	0	0	0	0	0	0	0	0	0	-10.71	1.51	12.22
si:dkey-33c12.4	6	-4.52	-0.85	0	-2.69	-1.39	0	0	0	0	0	-27.23	-15.06	12.17
elavl1b	6	0	0	0	0	0	0	0	0	0	0	-12.16	0	12.16
mat2b	6	0	0	0	0	0	0	0	0	0	0	-16.19	-4.03	12.16
ube3c	6	-0.78	0	0	-0.12	0	-0.96	0	0	0	0	-26.22	-14.07	12.15
metap2b	6	0	0	0	0	0	0	0	0	0	0	-15.89	-3.78	12.11
psmd13	6	0	0	0	0	0	-2.1	0	0	0	0	-31.25	-19.15	12.1
pcmtd1	6	-0.52	0	0	0	0	0	0	0	0	0	-12.08	0	12.08
selenos	6	0	0	0	0	0	0	0	0	0	0	-12.07	0	12.07
mt-atp8	6	-3.77	0	-2.09	-12.98	-11.69	-8.54	0	0	0	0	-31.89	-19.83	12.06
nudt21	6	0	0	0	-0.16	-1.71	0	0	0	0	0	-20.02	-7.96	12.06
b3gnt5a	6	0	0	0	0	0	-3.44	0	-22.27	0	0	-75.94	-63.9	12.04
gak	6	0	0	0	0	0	0	0	0	0	0	-31.11	-19.08	12.03
sf3a2	6	-48.69	0	-0.71	-17.13	-2.29	-2.45	0	0	0	0	-34.85	-22.82	12.03
smarcd2	6	0	0	0	0	0	0	0	0	0	0	-10.15	1.88	12.03
wipf1b	6	0	0	0	-1.42	0	0	0	0	0	0	-17.67	-5.64	12.03
czib	6	0	0	0	0	0	-0.22	0	0.07	0	0	-11.98	0	11.98
sema4aa	12	0	0	0	0	-1.58	0	0	-9.83	0	0	0	11.98	11.98
lcorl	6	6.32	0	0	0	0	0	0	0	0	0	-11.24	0.73	11.97
eif3k	5	0	36.39	0	0	0	0	0	18.11	0	0	-11.95	0	11.95
KIF2A	6	0	0	0	0	0	0	0	0	0	0	-19.03	-7.09	11.94
lims1	6	8.74	0	0	0	0	0	0	0	0	0	-15.51	-3.59	11.92
rnf10	6	-20.33	0	0	0	0	0	0	0	0	0	-29	-17.09	11.91
map3k7	6	0	0	0	0	0	0	0	0	0	0	-11.52	0.38	11.9
gstp1	12	0	23.3	8.15	3.72	4.86	0	0	14.3	0	0	45.02	56.91	11.89
atf6	6	0	0	0	0	0	0	0	0	0	0	-23.31	-11.44	11.87
cul1a	6	0	0	0	0	0	0	0	0	0	0	-16.06	-4.21	11.85
uqcrc2b	6	-10.52	0	-0.77	-22.37	-7.9	-10.74	0	0	0	0	-52.82	-40.98	11.84
ndufab1b	6	8.27	2.75	0	-0.32	0	-1.38	0	0.92	0	0	-16.87	-5.03	11.84
sugt1	6	0	0	0	0	0	0	0	-0.26	0	0	-16.38	-4.54	11.84
zgc:153993	6	1.54	0	0	0	0	0	0	0	0	0	-11.27	0.55	11.82
cdipt	6	0.68	0	0	0	0	0	0	0	0	0	-30.31	-18.5	11.81
farsb	6	0	0	0	0	0	0	0	0	0	0	-16.17	-4.38	11.79
atf1	6	0.43	0	0	0	0	0	0	0	0	0	-19.35	-7.57	11.78
atox1	6	-1.49	0	0	0	2.31	0	0	0	0	0	-11.77	0	11.77
ostf1	6	3.26	0	0	0	0	0	0	0	0	0	-27.13	-15.36	11.77
glud1a	6	-5.35	0	0	0	0	0	0	6.16	0	0	-11.74	0	11.74
fam193a	6	0	0	0	0	0	0	0	0	0	0	-19.56	-7.82	11.74
kmt5aa	6	0	0	0	0	0	0	0	0	0	0	-16.05	-4.34	11.71
cyc1	6	-3.29	0	-0.79	-20.39	-2.02	-9.08	0	0	0	0	-41.23	-29.53	11.7
BX572619.1	6	3.47	0	0	0	0	0	0	0	0	0	-11.31	0.36	11.67
fip1l1b	6	0	0	0	-0.08	0	-4.39	0	0	0	0	-16.96	-5.31	11.65
upf1	6	0	0	0	0	0	0	0	0	0	0	-18.52	-6.87	11.65
trim25	6	0	0	0	0	-0.79	0	0	0	0	0	-66.19	-54.55	11.64
nadkb	6	0	0	0	0	0	0	0	0	0	0	-12.23	-0.63	11.6
rnf14	6	0	0	0	0	0	0	0	0	0	0	-11.6	0	11.6
RNF14	6	0	0	0	0	0	0	0	0	0	0	-11.6	0	11.6
rnf213b	6	-0.68	-36.16	0	-7.51	-1.79	-4.13	0	0	0	-0.82	-144.2	-132.6	11.6
ilf2	6	-3.18	0	-0.78	-16.45	-7.75	-14.51	0	0	0	0	-52.64	-41.05	11.59
pgm2l1	6	0	0	0	0	0	0	0	0	0	0	-11.59	0	11.59
rps13	5	0	104.14	12.41	18.98	0	0.59	0	44.13	0	0	-11.59	0	11.59
ciao2a	6	0	0	0	0	0	0	0	0	0	0	-11.57	0	11.57
atp5if1b	6	-9.83	2.06	0	-19.92	-8.28	-9.28	0	0	0	0	-20.24	-8.67	11.57
UBL4A	6	0	0	0	0	0	0	0	0	0	0	-19.76	-8.2	11.56
commd7	6	0	0	0	0	0	0	0	0.48	0	0	-19.31	-7.77	11.54
rps3	8	1.27	5.94	5.89	31.19	3.33	24.33	0	24.74	0	0	-2.81	8.72	11.53
abhd16a	6	-3.25	0	0	0	0	-1.07	0	0	0	0	-23.34	-11.86	11.48
capn7	6	0	0	0	0	0	0	0	0	0	0	-24.3	-12.83	11.47
necap2	6	0	0	0	0	0	0	0	0	0	0	-12.38	-0.92	11.46
si:rp71-68n21.9	6	0	0	0	0	-2.17	0	0	0	0	0	-13.64	-2.19	11.45
becn1	6	0	0	0	0	0	0	0	0	0	0	-11.44	0	11.44
snd1	6	0	0	0	0	0	0	0	3.52	0	0	-11.43	0	11.43
ypel5	6	-3.03	0	0	-0.47	0	0	0	0	0	0	-11.43	0	11.43
sec22ba	6	1.08	0	0	0	0	0	0	0	0	0	-15.8	-4.4	11.4
msra	12	0	0	0	0	0	2.9	0	1.52	0	0	9.01	20.39	11.38
sik1	13	-69.36	-2.8	-1.73	-4.43	0	0	0	-20.64	0	0	-11.36	0	11.36
maf1	6	0.39	0	0	0	0	0	0	-1.75	0	0	-15.55	-4.22	11.33
MAF1	6	0.39	0	0	0	0	0	0	-1.75	0	0	-15.55	-4.22	11.33
srsf3b	6	0	0	0	0	0	-1.28	0	0	0	0	-26.27	-14.96	11.31
tpmt.2	6	0	0	0	0	0	0	0	-1.28	0	0	-10.8	0.5	11.3
si:ch211-288g17.3	6	0	0	0	0	0	-1.61	0	0	0	-0.02	-13.69	-2.43	11.26
dicp3.1	6	8.86	0	0	0	0	0	0	0	0	0	-13.67	-2.42	11.25
tspy	6	0	0	0	0	0	0	0	0	0	0	-11.24	0	11.24
mrps36	6	0	0	0	-11.79	-0.15	-7.21	0	0	0	0	-29.47	-18.23	11.24
ankrd10b	6	0	0	0	0	0	0	0	3.17	0	0	-11.22	0	11.22
uba7	6	0	0	0	0	0	0	0	0	0	0	-22.91	-11.71	11.2
ube2e1	5	-1.16	8.28	0	0	-3.89	0	0	0	0	0	-14.77	-3.57	11.2
CU984600.2	6	-19.98	-62.79	-2.2	-14.57	-27.2	-23.48	0	0	0	-3.67	-298.95	-287.75	11.2
BX005340.1	12	0	0	1.89	5.03	0	0	0	0	0	0	0	11.19	11.19
mcrip1	6	0	0	0	-0.31	0	-0.68	0	0	0	0	-21.48	-10.3	11.18
selenof	5	1.89	7.9	0	0	0	-3.59	0	0	0	0	-11.16	0	11.16
cep350	6	-1.91	-6.34	0	0	0	0	0	-9.38	0	0	-27.25	-16.12	11.13
frmd8	6	-1.55	0	0	-1.05	0	0	0	0	0	0	-24.87	-13.76	11.11
cd22	6	8.73	12.29	0	0	0	0	0	1.42	0	0	-68.32	-57.21	11.11
kcnip3b	6	0	0	0	0	0	0	0	0	0	0	-11.09	0	11.09
otud5b	6	0	0	0	0	0	0	0	0	0	0	-25.41	-14.32	11.09
fas	6	0	0	0	-0.19	0	-1.45	0	0	0	0	-39.19	-28.11	11.08
cpda	6	0	0	0	0	0	0	0	0	0	0	-15.86	-4.79	11.07
sec14l1	6	-7.76	0	0	0	0	0	0	0	0	0	-16.03	-4.97	11.06
SEC14L1	6	-7.76	0	0	0	0	0	0	0	0	0	-16.03	-4.97	11.06
manf	6	8.57	0	0	0	0	-0.18	0	0	0	0	-11.06	0	11.06
snrpc	6	0	0	0	-2.72	0	-0.45	0	0	0	0	-20.91	-9.85	11.06
zbtb2b	6	-12.49	0	0	-4.72	-1.49	0	0	-2.16	0	0	-25.19	-14.15	11.04
si:dkey-42i9.4	6	-7.42	0	0	0	0	0	0	0	0	0	-11.04	0	11.04
bysl	6	0	0	0	0	0	0	0	2.13	0	0	-11.02	0	11.02
rps6	7	32.65	2.76	17.31	49.74	17.9	37.29	0	27.55	0	0	0	11.02	11.02
ufm1	6	6.77	0	0	0	0	0	0	0	0	0	-10.98	0	10.98
rcor1	6	2.09	0	0	0	0	0	0	0	0	0	-10.61	0.37	10.98
sptlc1	6	-2.36	0	0	0	0	0	0	0	0	0	-15.14	-4.17	10.97
max	6	2.15	0	2.5	0	0	0	0	0	0	0	-13.06	-2.1	10.96
clns1a	6	0	0	0	0	0	0	0	0	0	0	-10.69	0.27	10.96
zgc:123010	6	-15.59	0	0	-0.21	0	0	0	0	0	0	-33.73	-22.77	10.96
rnf115	6	0	0	0	0	0	0	0	0	0	0	-19.1	-8.16	10.94
tm9sf2	6	-3.01	0	0	0	-0.84	0	0	0	0	0	-22.47	-11.59	10.88
trim33	6	-2.87	0	0	0	0	0	0	0	0	0	-13.6	-2.72	10.88
naa20	6	-0.38	0	0	-2.07	0	-3.34	0	0	0	0	-25.82	-14.95	10.87
stx11a	6	-12.41	0	0	0	0	0	0	-16.59	0	0	-10.87	0	10.87
atp6v0a1a	6	0	0	0	0	0	0	0	0	0	0	-10.86	0	10.86
si:ch211-199g17.2	9	0	-9.88	0	0	0	0	0	0	0	0	-10.85	0	10.85
uchl3	6	4.19	0	0	0	0	-1.37	0	0	0	0	-13.22	-2.39	10.83
apbb1ip	12	3.6	0	0.65	2.56	0	0	0	0	0	0	0	10.79	10.79
man2b1	6	-12.01	0	0	-1.6	0	0	0	0	0	0	-15.22	-4.47	10.75
si:dkey-237j10.2	6	0	0	0	0	0	0	0	0	0	0	-20.59	-9.85	10.74
mrpl30	6	0	0	0	0	0	0	0	0	0	0	-10.71	0	10.71
otud3	6	0	0	0	0	0	0	0	0	0	0	-14.18	-3.47	10.71
arhgap15	6	0	0	0	0	0	0	0	-0.86	0	0	-10.69	0	10.69
ubap2a	6	0	0	0	0	0	0	0	0	0	0	-9.4	1.28	10.68
ilrun	6	0	0	0	0	0	0	0	0	0	0	-12.73	-2.09	10.64
zbtb10	6	0	0	0	0	0	0	0	0	0	0	-12.54	-1.91	10.63
sumo1	6	0	0	0	0	0	0	0	0	0	0	-18.95	-8.33	10.62
ppid	6	0	0	0	0	0	0	0	2.48	0	0	-10.61	0	10.61
reps1	6	0	0	0	0	0	0	0	0	0	0	-13.75	-3.14	10.61
dennd4c	6	-6.58	0	0	0	0	0	0	-6.77	0	0	-10.59	0	10.59
sod2	6	0	0	0	0	-2.02	-2.29	0	0	0	0	-17.32	-6.73	10.59
zgc:153293	6	0	0	0	0	0	0	0	0	0	0	-10.57	0	10.57
cd82b	17	0	0	0	0	-16.84	0	0	-2.84	0	0	-12.41	-1.86	10.55
ggnbp2	6	0	0	0	0	0	-1.81	0	0	0	0	-18.95	-8.42	10.53
si:ch211-150o23.2	6	0	0	0	0	-4.6	0	0	0	0	0	-10.51	0	10.51
mbpb	6	0.03	0	0	0	0	0	0	0	0	0	-12.87	-2.37	10.5
crebbpb	6	-0.92	0	0	0	0	0	0	0	0	0	-17.96	-7.47	10.49
vps41	6	0	0	0	0	0	0	0	0	0	0	-13	-2.55	10.45
serf2	6	-17.38	4.42	0	0	0	0	0	0	0	0	-10.41	0	10.41
SERF2	6	-17.38	4.42	0	0	0	0	0	0	0	0	-10.41	0	10.41
stx12	6	0.82	0	0	0	0.62	0	0	0	0	0	-13.27	-2.87	10.4
zgc:112982	6	0	0	0	0	0	0	0	0	0	0	-16.08	-5.68	10.4
dnaja2b	6	0	0	0	-3.68	0	0	0	0	0	0	-13.32	-2.93	10.39
zyg11	6	0	0	0	0	-1.93	0	0	0	0	0	-15.82	-5.43	10.39
vma21	6	0.65	3.03	0	0	0	0	0	0	0	0	-9.99	0.38	10.37
med19b	6	0	0	0	0	0	0	0	0	0	0	-19.06	-8.69	10.37
mdm4	6	0	0	0	0	0	0	0	0	0	0	-11.2	-0.84	10.36
cmtr1	6	0	0	0	0	0	0	0	0	0	0	-31.84	-21.5	10.34
mbd3a	6	0	0	0	0	0	0	0	0	0	0	-10.33	0	10.33
rbm22	6	0	0	0	0	0	0	0	0	0	0	-16.76	-6.47	10.29
zgc:110239	6	-13.94	6.57	0	-4.15	0	0	0	0	0	0	-11.82	-1.53	10.29
ap1ar	6	0	0	0	0	0	0	0	0	0	0	-10.96	-0.68	10.28
prpf8	6	-37.76	0	-0.38	-10.29	-8.3	-3.46	0	0	0	0	-23.05	-12.78	10.27
si:ch211-132b12.7	6	0	0	0	0	0	0	0	0	0	0	-10.27	0	10.27
anxa2a	11	58.23	28.28	0	0	29.67	0	0	0.73	0	0	3.3	13.55	10.25
eif3ha	5	-0.42	26.35	0.21	0	0	3.83	0.04	6.79	0	0	-10.23	0	10.23
lrba	6	0	0	0	0	0	0	0	0	0	0	-18.49	-8.29	10.2
cnot4b	6	0	0	0	0	0	0	0	0	0	0	-10.19	0	10.19
taf1	6	0	0	0	0	-0.48	0	0	0	0	0	-10.19	0	10.19
lrrc8da	6	0	0	0	0	0	0	0	0	0	0	-10.18	0	10.18
ccdc18	6	0	0	0	0	0	0	0	0	0	0	-10.17	0	10.17
gigyf1b	6	-2.7	0	0	0	0	0	0	0	0	0	-16.28	-6.12	10.16
pkig	6	0	0	0	0	0	0	0	0	0	0	-10.14	0	10.14
tmem42a	6	0	0	0	-2.01	0	0	0	0	0	0	-24.6	-14.48	10.12
ciao2b	6	0	0	0	0	0	0	0	0	0	0	-18.25	-8.13	10.12
trps1	6	0	0	0	0	0	0	0	0	0	0	-10.12	0	10.12
mrpl13	6	0	0	0	-5.44	-5.85	-5.5	0	0	0	0	-17.21	-7.1	10.11
nubp2	6	-0.66	0	0	0	0	-0.99	0	0	0	0	-19.73	-9.63	10.1
vgll4b	6	0	0	0	0	0	0	0	0	0	0	-10.09	0	10.09
arl14ep	6	0	0	0	0	-4.89	-0.18	0	0	0	0	-15.05	-4.97	10.08
acaa2	6	0	0	0	0	0	-1.47	0	0	0	0	-10.06	0	10.06
gdap2	6	-30.32	0	0	-6.93	0	-0.18	0	-2.02	0	0	-22.51	-12.46	10.05
ergic2	6	5.22	0	0	0	0	0	0	0	0	0	-12.21	-2.18	10.03
tmem147	6	0	0	0	-1.74	0	-1.83	0	0	0	0	-22.17	-12.15	10.02
amd1	6	-1.45	0	0	0	-3.64	0	0	0	0	0	-10.01	0	10.01
lasp1	12	21.65	0	0	0	0	0	0	-0.61	0	0	3.4	13.4	10
tspan3a	6	-2.93	0	0	0	0	0	0	0	0	0	-10.7	-0.7	10
morc3a	6	0	0	0	0	0	0	0	0	0	0	-23.65	-13.65	10
amfra	6	0	0	0	0	0	0	0	0	0	0	-9.01	0.97	9.98
nenf	6	7.97	0	0	0	0	0	0	0.99	0	0	-9.96	0	9.96
nr3c1	6	-6.77	0	0	0	-0.89	0	0	0	0	0	-14.29	-4.33	9.96
tpd52l2b	12	0	0	0	0	0	0	0	0	0	0	0	9.93	9.93
trir	6	0	0	0	0	0	0	0	0	0	0	-11.83	-1.91	9.92
dhrs4	6	0	0	0	0	0	0	0	0	0	0	-24	-14.09	9.91
DDX17	6	-16.22	0	0	0	0	0	0	0	0	0	-9.9	0	9.9
sumo3a	6	0	4.18	0	0	0	0	0	0	0	0	-18.67	-8.79	9.88
ostc	6	6.02	0	0	0	0	-2.3	0	0	0	0	-21.98	-12.12	9.86
med29	6	-0.29	0	0	0	0	0	0	0	0	0	-22	-12.14	9.86
coq4	6	0	0	0	0	0	0	0	0	0	0	-9.83	0	9.83
mia3	6	0	0	0	0	0	0	0	0	0	0	-14.09	-4.29	9.8
naa10	5	0	7.36	0	0	-0.16	0	0	0	0	0	-9.79	0	9.79
uqcc2	6	0	0	0	-3.13	-0.26	-1.69	0	0	0	0	-27.08	-17.29	9.79
dynlt3	6	0	4.31	0	0	0	0	0	0	0	0	-9.78	0	9.78
cfh	12	0	0	0	0	1.73	0	0	0.6	0	0	0.22	9.97	9.75
nedd8l	6	0	0	0	0	0	-0.04	0	0	0	0	-20.5	-10.76	9.74
ncln	6	0	0	0	-1.17	0	-4.27	0	0	0	0	-22.58	-12.84	9.74
ppiaa	8	0.01	0	4.16	15.06	4.59	23.61	0	0.36	0	0	0	9.73	9.73
rps9	5	72.64	154.41	39.88	104.57	19.73	33.57	10.27	82.18	0	0	28.91	38.63	9.72
clpp	6	0	0	0	-2.07	-0.93	-6.31	0	0	0	0	-18.26	-8.55	9.71
jagn1b	6	0	0	0	0	0	0	0	0.75	0	0	-9.71	0	9.71
tmem59	5	0	10.09	0	0	0	0	0	0	0	0	-12.87	-3.16	9.71
tmem189	6	0.31	0	1.49	14.7	9.49	0	0	0	0	0	-15.35	-5.65	9.7
entpd1	6	0	0	0	0	0	0	0	2.3	0	0	-22.03	-12.35	9.68
tfcp2	6	0	0	0	0	0	0	0	0	0	0	-12.71	-3.04	9.67
gnb4b	6	0	0	0	0	0	0	0	0	0	0	-9.67	0	9.67
sc:d217	6	0	0	0	0	0	0	0	0	0	0	-9.67	0	9.67
cnn2	12	23.03	3.75	0	1.57	5.61	0	0	0	0	0	8.28	17.94	9.66
hagh	6	-7.51	0	0	-3.62	-1.11	0	0	0	0	0	-17.11	-7.45	9.66
polr2f	6	0	0	0	0	0	-2.36	0	0	0	0	-15.96	-6.3	9.66
ilk	6	0	0	0	0	0	0	0	0	0	0	-9.65	0	9.65
dcun1d1	6	0	0	0	0	0	0	0	0	0	0	-14.64	-5.02	9.62
usp32	6	-6.26	0	0	0	0	0	0	0	0	0	-12.16	-2.54	9.62
dop1b	6	-19.27	0	0	-6.02	0	0	0	0	0	0	-15.55	-5.94	9.61
chmp6b	6	0.04	0	0	0	0	0	0	0	0	0	-15.64	-6.04	9.6
CU856520.1	6	0	0	0	0	0	0	0	0	0	0	-9.59	0	9.59
plekho2	12	1.33	-1.43	2.47	0.57	0	0.91	0	0	0	0	0	9.58	9.58
ENSDARG00000101034	9	-15.29	-39.28	0	0	-0.54	0	0	-11.63	0	0	-9.57	0	9.57
junba	6	-11.96	6.96	0	0	0	0	0	0	0	0	-9.57	0	9.57
prpsap2	6	-9.17	0	0	0	0	0	0	0	0	0	-9.56	0	9.56
CT583625.5	6	-7.26	0	0	-3.89	0	0	0	0	0	0	-44.26	-34.7	9.56
BX322587.1	13	-11.62	0	0	0	0	0	0	0	0	0	7.5	17.04	9.54
rps27.1	5	20	112.4	28.01	68.31	5.12	26.93	10.13	53.06	0	0.25	-5.95	3.59	9.54
mrpl14	6	3.73	0	0	0	0	0	0	0	0	0	-11.9	-2.38	9.52
BOLA2	6	0	0	0	0	-0.23	0	0	0	0	0	-19.9	-10.4	9.5
cast	6	2.1	0	0	5.43	0	0	0	2.33	0	0	-16.09	-6.6	9.49
me2	6	6.87	0	0	0	3.58	0	0	0	0	0	-17.59	-8.11	9.48
tufm	6	0	0	0	-9.4	-2.64	-4.27	0	0	0	0	-10.82	-1.34	9.48
yipf5	6	0	0	0	0	0	0	0	0	0	0	-9.46	0	9.46
fam120a	6	0	0	0	0	0	1.33	0	2.17	0	0	-9.45	0	9.45
si:ch211-195b13.1	6	-10.17	0	-1.83	-0.97	-5.66	-4.5	0	0	0	0	-27.12	-17.7	9.42
abca1b	6	-15.51	0	0	0	6.04	0	0	3.07	0	0	-37.96	-28.57	9.39
nadka.1	6	-2.82	0	0	-3.4	0	0	0	-9.21	0	0	-40.56	-31.18	9.38
tmem115	6	0	0	0	0	0	0	0	0	0	0	-9.38	0	9.38
dlat	6	0	0	0	-16.07	0	-7.24	0	0	0	0	-33.07	-23.69	9.38
ikzf1	6	0	0	0	-11.54	-14.02	-3.43	0	0	0	0	-27.42	-18.06	9.36
si:ch211-213a13.1	12	10.83	0	0.32	14.51	0	0	0	5.07	0	0	0	9.35	9.35
chordc1b	6	0	0	0	0	0	0	0	0	0	0	-10.69	-1.36	9.33
med21	6	0	0	0	0	-1.8	0	0	0	0	0	-16.25	-6.93	9.32
stag2a	6	0	0	0	0	0	0	0	0	0	0	-11.41	-2.09	9.32
rhogb	6	7.06	0	0	-1.09	0	0	0	-30.01	0	0	-105.63	-96.31	9.32
sptlc2a	13	-39.05	0	0	-1.97	-1.83	0	0	-25.28	0	0	-9.31	0	9.31
spcs3	6	0	3.26	0	0	0	0	0	0	0	0	-9.28	0	9.28
cbl	6	0	-9.88	0	0	0	0	0	-5.36	0	0	-31.66	-22.39	9.27
rpl19	5	0	147.85	10.96	37.78	9.53	27.94	10.1	54.51	0	2.34	-6.96	2.27	9.23
srsf7a	6	0	0	0	0	0	0	0	0	0	0	-11.26	-2.04	9.22
mib1	6	0	0	0	0	0	0	0	0	0	0	-9.19	0	9.19
si:ch211-217k17.7	12	11.5	0	3.54	10.8	0	11.81	0.07	1.41	0	0	0	9.19	9.19
C1H4orf33	6	0	0	0	0	0	0	0	0	0	0	-19.71	-10.55	9.16
rcc2	6	-0.56	0	0	-1.22	-8.43	-0.98	0	0	0	0	-18.11	-8.96	9.15
lpin2	6	-1.29	0	0	0	0	0	0	0	0	0	-9.14	0	9.14
supt5h	6	-0.33	0	0	-0.81	0	0	0	0	0	0	-10.29	-1.16	9.13
snx6	6	0	0	0	0	0	0	0	0	0	0	-19.78	-10.66	9.12
enah	6	0	0	0	0	0	0	0	0	0	0	-9.1	0	9.1
ginm1	6	-45.23	0	-3.57	-5.68	0	-2.66	0	0	0	0	-20.95	-11.86	9.09
tollip	6	-0.06	0	0	0	0	0	0	0	0	0	-33.22	-24.14	9.08
lsm8	13	-53.58	0	-3.53	-16.32	-4.35	-12.13	0	-7.52	0	0	-15.48	-6.42	9.06
dusp1	13	-6.65	0	-0.69	-0.3	0	0	0	0	0	0	0	9.03	9.03
il15ra	6	-4.58	0	0	-6.69	-0.3	0	0	-4.67	0	0	-77.75	-68.73	9.02
cyb5b	6	0	0	0	0	0	0	0	-0.37	0	0	-19.56	-10.55	9.01
apmap	11	24.44	0	0	0	0	0	0	0	0	0	-10.33	-1.35	8.98
taok2a	6	0	0	0	0	0	0	0	0	0	0	-12.38	-3.4	8.98
fam49ba	6	2.99	0	0	0	-1.56	0	0	0	0	0	-10.55	-1.58	8.97
oga	6	0	0	0	-0.42	0	0	0	0	0	0	-10.7	-1.75	8.95
sgta	6	0	0	0	0	0	0	0	0	0	0	-20.03	-11.09	8.94
nudt9	6	4.45	0	0	0	0	0	0	0	0	0	-8.94	0	8.94
ep300b	6	0	0	0	0	0	0	0	0	0	0	-11.94	-3.01	8.93
dhx15	6	0	0	0	-0.38	0	0	0	0	0	0	-17.22	-8.31	8.91
capgb	10	2.43	5.67	0	0	0	0	0	-24.19	0	0	0	8.9	8.9
slc35f6	6	0	6.94	-0.11	0	2.04	0	0	0	0	0	-12.6	-3.71	8.89
zc3h14	6	0	0	0	-4.1	-1.96	0	0	0	0	0	-11.01	-2.12	8.89
mrpl36	11	10.89	0	0	0	0	0	0	3.55	0	0	-6.91	1.97	8.88
mcts1	6	0.4	0	0	0	0	0	0	0	0	0	-11.6	-2.72	8.88
kcnq5b	6	0	0	0	0	-3.79	0	0	0	0	0	-8.85	0	8.85
mt-nd6	6	-3.83	0	0	-5.54	0	-0.55	0	0	0	0	-8.8	0	8.8
uqcc3	6	0.96	0	0	0	0	0	0	0	0	0	-12.25	-3.45	8.8
dynlrb1.1	11	18.57	0	0	0	0	0	0	0	0	0	-9.77	-0.97	8.8
hspa4b	6	0	0	0	0	0	0	0	0	0	0	-13.06	-4.28	8.78
fosab	6	-2.07	0	0	-2.43	0	0	0	1.45	0	0	-8.76	0	8.76
aco2	6	-3.74	0	-2.74	-18.72	-2.48	-8.17	0	0	0	-0.11	-42.55	-33.8	8.75
rpl10a	5	20.07	168.81	18.32	47.36	10.15	24.03	11.55	64.55	0	0.68	0	8.75	8.75
trip12	6	0	0	0	-2.16	0	0	0	0	0	0	-13.89	-5.15	8.74
anxa1a	5	19.7	33.62	0	2.02	25.26	0	0	16.71	0	0	0	8.7	8.7
myorg	6	-4.74	0	0	-3.2	0	0	0	-11.79	0	0	-13.56	-4.86	8.7
nrbf2b	6	0	0	0	0	0	0	0	0	0	0	-10.79	-2.09	8.7
slc39a10	13	-38.89	0	0	-1.95	0	0	0	-4.41	0	0	-8.69	0	8.69
zdhhc4	6	0.06	0	0	0	0	0	0	0	0	0	-8.69	0	8.69
pgm2	6	0	0	-8.15	-7.69	0	-4.1	0	0	0	0	-44.29	-35.62	8.67
romo1	2	-0.4	49.53	0	0	0	12.45	4.17	4.56	0	2.61	0	8.66	8.66
si:ch73-248e21.7	12	3.81	5.99	1.01	0	-2.95	0	0	0	0	0	0	8.65	8.65
chic2	6	0	0	0	0	0	0	0	0	0	0	-10.3	-1.67	8.63
mtmr6	6	0	0	0	0	0	0	0	0	0	0	-8.61	0	8.61
txnl4a	6	-0.09	0	0	-6.38	-1.47	-3.45	0	0	0	0	-32.22	-23.61	8.61
huwe1	6	0	0	0	0	0	0	0	0	0	0	-22.92	-14.33	8.59
tk2	6	0	0	0	0	0	0	0	0	0	0	-18.1	-9.51	8.59
CU633745.1	6	0	0	0	0	0	0	0	0	0	0	-14.14	-5.55	8.59
sirt2	6	0	0	0	0	0	0	0	0	0	0	-32.33	-23.74	8.59
uggt1	6	0	0	0	0	0	0	0	0	0	0	-11.01	-2.43	8.58
med10	6	0	0	0	0	0	0	0	0	0	0	-24.35	-15.8	8.55
zfand3	6	0	0	0	0	0	0	0	0	0	0	-11.81	-3.26	8.55
csnk1g1	6	0	0	0	0	0	0	0	0	0	0	-8.54	0	8.54
ywhaqb	6	0	0	-0.08	-4.68	-3.46	0	0	-2.28	0	0	-63.66	-55.12	8.54
capn2b	11	14.05	0	0	2.46	1.28	2.53	0.37	0	0	0	-8.49	0	8.49
taok1a	6	0	0	0	0	0	0	0	0	0	0	-10.31	-1.82	8.49
ppp3cca	6	0	0	0	0	0	0	0	0	0	0	-8.48	0	8.48
rac2	6	0	1.95	0	-9.9	-1.07	-0.43	0	-4	0	0	-12.87	-4.4	8.47
smc5	6	0	0	0	0	-0.71	0	0	0	0	0	-22.15	-13.69	8.46
tial1	6	-3.95	0	0	0	0	0	0	0	0	0	-8.45	0	8.45
cfbl	6	-73.28	-0.1	-18.61	-74.04	-8.69	-19.22	0	0	0	0	-116.75	-108.31	8.44
gse1	6	0	0	0	0	0	0	0	0	0	0	-8.43	0	8.43
eif3ba	5	5.92	20.01	1.09	0	0	0	0	0	0	0	-8.42	0	8.42
phrf1	6	-1.17	0	0	0	-1.32	0	0	0	0	0	-16.53	-8.12	8.41
rbm4.3	6	0	0	0	0	0	0	0	0	0	0	-14.2	-5.79	8.41
eif3s6ip	5	0	37.29	0	0	0	0	0	6.07	0	0	-8.4	0	8.4
bud31	6	-4.41	0	0	-3.82	0	-2.41	0	0	0	0	-26.09	-17.71	8.38
anxa5b	11	9.42	13.94	0	0.73	19.8	-0.85	0	0.83	0	0	-8.37	0	8.37
tmc8	6	0	0	0	0	-1.89	0	0	0	0	0	-18.69	-10.34	8.35
tmem165	6	-9.02	0	0	-2.31	0	-0.53	0	0	0	0	-15.16	-6.81	8.35
adora2b	6	0	0	0	0	0	0	0	0	0	0	-8.35	0	8.35
cltcb	6	3.13	0	0	0	0	0	0	0	0	0	-25.71	-17.43	8.28
ndufv3	6	-0.59	0	0	-3.62	0	-1.93	0	0	0	0	-16.88	-8.62	8.26
cbx3a	6	8.53	0	0	0	0	0	0	0	0	0	-12.42	-4.17	8.25
rab11ba	6	0	0	0	-3.04	-1.04	0	0	-1.2	0	0	-8.25	0	8.25
mat2aa	6	0	0	0	0	0	0	0	0	0	0	-19.23	-11.01	8.22
prkab1b	6	-3.98	3.96	0	-10.21	0	0	0	-0.51	0	0	-8.83	-0.62	8.21
si:ch211-119e14.1	6	0	0	0	0	0	0	0	5.37	0	0	-23.71	-15.52	8.19
dyrk1b	6	0	0	0	0	0	0	0	0	0	0	-8.18	0	8.18
gpd2	6	0	0	0	0	0	0	0	-0.12	0	0	-13.94	-5.77	8.17
dock8	6	0	0	0	0	0	0	0	0	0	0	-15.27	-7.11	8.16
nsfb	6	-0.91	0	0	-1.4	0	0	0	0	0	0	-8.14	0	8.14
ube2f	6	0	0	0	0	0	0	0	0	0	0	-8.14	0	8.14
usp9	6	0	0	0	0	0	0	0	0	0	0	-12.39	-4.25	8.14
hnrnpk	6	-3.83	0	0	0	0	0	0	0	0	0	-24.79	-16.66	8.13
med31	6	-1.47	0	0	0	0	0	0	0	0	0	-16.74	-8.62	8.12
cpne1	11	15.39	0	0	1.02	4.25	0	0	3.51	0	0	-8.1	0	8.1
rps6ka1	6	9.09	0	0	-1.54	0	0	0	0	0	0	-17.06	-8.96	8.1
prpf39	6	0	0	0	0	-0.25	0	0	0	0	0	-12.99	-4.91	8.08
si:dkey-42i9.6	6	-31.89	5.14	0	0	0	0	0	-6.88	0	0	-91.18	-83.14	8.04
rab11a	6	0	0	0	0	0	0	0	-0.15	0	0	-11.72	-3.68	8.04
rps16	5	4.52	51.57	29.85	31.59	1.06	22	4.34	42	0	0	0	8.01	8.01
gsto2	5	0	11.58	8.13	8.02	0.18	6.62	0	6.09	0	0	0	8	8
mpzl2b	6	0	0	0	0	0	0	0	0	0	0	-19.84	-11.84	8
aldocb	6	0	0	-4.16	-12	-8.72	-12.08	0	-51.06	0	0	-100.5	-92.54	7.96
atp6v1h	6	-37.24	0	-2.35	-37.49	0	-0.74	0	-15.32	0	0	-42.6	-34.68	7.92
kmt2d	6	0	0	0	0	0	0	0	0	0	0	-7.91	0	7.91
smad3a	10	0	0	0	0	0	0	0	-20.93	0	0	-11.87	-3.99	7.88
tet2	6	0	0	0	0	-1.01	0	0	0	0	0	-7.86	0	7.86
lpp	6	3.72	0	0	0	0	0	0	0	0	0	-7.84	0	7.84
ppp2r1ba	6	0	0	0	0	0	0	0	0	0	0	-20.95	-13.11	7.84
ube2l3a	6	-2.01	0	0	-3.73	0	0	0	0	0	0	-45.86	-38.07	7.79
waca	6	0	0	0	0	0	0	0	0	0	0	-12.31	-4.54	7.77
wbp2nl	6	-19.26	0	-1.83	-17.88	-9.44	-0.98	0	-5.36	0	0	-47.03	-39.27	7.76
UBB	6	1.49	14.2	6.35	0	0	2.08	0	0	0	0	-19.61	-11.95	7.66
ubb	6	1.49	14.2	6.35	0	0	2.08	0	0	0	0	-19.61	-11.95	7.66
ahnak	3	0	-1.22	0	8.58	39.56	2.51	0	17.11	0	0	7.91	15.56	7.65
mpeg1.1	4	0	13.88	1.3	10.68	18.61	21.37	0	58.81	0	0	0	7.65	7.65
sar1b	6	0	0	0	0	0	-1.22	0	0	0	0	-7.64	0	7.64
arcn1a	6	0	0	0	0	0	-2.85	0	0	0	0	-16.96	-9.33	7.63
idh3a	6	0	0	0	-5.54	0	-1.71	0	0	0	0	-19.53	-11.9	7.63
kansl1b	6	0	0	0	0	0	0	0	0	0	0	-5.05	2.58	7.63
tomm22	6	0	0	0	-1.17	0	-4.05	0	0	0	0	-29.01	-21.39	7.62
si:ch211-194k22.8	6	0	0	0	0	0	0	0	0.47	0	0	-7.61	0	7.61
pik3cb	6	0	0	0	0	0	0	0	0	0	0	-18.73	-11.14	7.59
tpm3	11	63.65	2.43	0	0	0	0	0	0	0	0	2.36	9.95	7.59
pik3cd	6	0	0	0	0	-3.81	0	0	0	0	0	-17.21	-9.63	7.58
ddt	6	0	0	0	-4.17	0	0	0	0	0	0	-25.92	-18.36	7.56
rgs14a	6	0	0	0	0	0	0	0	0	0	0	-7.56	0	7.56
ap1b1	6	0	0	0	0	0	0	0	0	0	0	-25.08	-17.52	7.56
kmt2ba	6	-3.95	0	0	0	-2.26	0	0	0	0	0	-9.83	-2.29	7.54
zgc:85777	6	0	0	0	0	0	0	0	0	0	0	-10.09	-2.57	7.52
si:ch211-66e2.3	10	1.31	3.35	13.36	0	0	2.18	0	-24.07	0	0	0	7.51	7.51
fibpa	6	0	0	0	0	0	0	0	0	0	0	-7.5	0	7.5
pigrl2.3.1	11	11.15	0	0	0	0	-2.23	0	-1.29	0	0	-7.49	0	7.49
clec16a	6	0	0	0	0	0	0	0	-1.55	0	0	-10.17	-2.72	7.45
krit1	6	0	0	0	0	0	0	0	0	0	0	-12.37	-4.93	7.44
mapre1a	12	0	2.23	0	0	0	0	0	-3.37	0	0	11.46	18.9	7.44
mmp13a	6	0	0	0	0	0	-5.31	0	0	0	0	-7.42	0	7.42
galnt7	6	0	0	0	0	0	0	0	0	0	0	-12.24	-4.83	7.41
si:ch211-189a15.5	6	0	0	0	0	0	0	0	0	0	0	-7.41	0	7.41
ctss1	12	0	0	0	0	0	0	0	0	0	0	0	7.36	7.36
rsl24d1	2	-6.02	67.98	4.89	12.07	0	21.11	2.16	6.5	0	4.38	0	7.34	7.34
phf11	6	0	0	0	0	-3.27	0	0	0	0	0	-107.42	-100.1	7.32
cmc2	6	0	0	0	0	-0.8	0	0	0	0	0	-7.31	0	7.31
ep300a	6	0	0	0	0	0	0	0	0	0	0	-15.28	-7.97	7.31
ubfd1	6	0	0	0	0	0	0	0	0	0	0	-20.47	-13.17	7.3
ccdc25	6	0	0	0	0	0	0	0	0	0	0	-7.26	0	7.26
strn3	6	0	0	0	0	0	0	0	0	0	0	-16.81	-9.55	7.26
sumo2b	5	0	19.93	0	0	0	0.68	0	0	0	0	7.69	14.94	7.25
tle3b	6	0	0	0	0	0	0	0	-0.17	0	0	-25.97	-18.74	7.23
mgat1b	6	0	0	0	0	0	0	0	0	0	0	-7.22	0	7.22
si:dkey-28b4.7	6	0	0	0	-4.84	0	0	0	0	0	0	-39	-31.79	7.21
zmp:0000001082	12	10.29	0	0	1.61	0	2.76	0	0	0	0	1.64	8.8	7.16
brwd1	6	-7.11	0	0	0	0	0	0	0	0	0	-10.83	-3.72	7.11
dpp9	6	-1.71	0	0	0	0	0	0	0	0	0	-20.19	-13.09	7.1
atp2a3	17	0	0	0	0	-11.57	0	0	0	0	0	-11.29	-4.19	7.1
tmem39a	6	0	0	0	0	0	0	0	2.21	0	0	-7.08	0	7.08
ddx42	6	-2.78	0	0	-1.71	0	0	0	0	0	0	-8.27	-1.23	7.04
bmp2k	6	-23.54	0	-2.12	-1.08	0	-1.85	0	0	0	0	-15.98	-8.95	7.03
zmp:0000000735	6	0	0	0	0	-2.74	-0.51	0	0	0	0	-56.54	-49.51	7.03
lnpep	6	0	0	0	0	0	0	0	0	0	0	-16.81	-9.78	7.03
ncf2	11	53.13	1.12	0	0	0	6.91	0	-9.42	0	0	-26.67	-19.65	7.02
rbb4l	6	-4.47	0	0	-9.62	-3.75	-3.05	0	0	0	0	-22.89	-15.87	7.02
rplp2	13	-24.34	2.36	0	0.69	0	31.63	0.05	11.03	0	0	-2.41	4.61	7.02
egr1	6	0	0	0	-1.68	0	0	0	0	0	0	-82.09	-75.09	7
aldoaa	6	6.29	31.29	0	0	0	0	0.35	0	0	0	-22.96	-15.97	6.99
shrprbck1r	6	0	0	0	0	0	0	0	0	0	0	-6.98	0	6.98
svild	6	0	0	0	0	0	0	0	-3.24	0	0	-6.98	0	6.98
stat6	6	0	0	0	0	0	0	0	0	0	0	-13.34	-6.36	6.98
prss16	6	-1.02	0	0	-3.32	0	0	0	0	0	0	-12.71	-5.76	6.95
hint1	6	0	9.55	0	0	-2.09	-5.38	0	15.14	0	0	-24.82	-17.9	6.92
cebpg	6	-1.03	0	0	0	0	0	0	0	0	0	-13.62	-6.7	6.92
copb2	6	-0.68	0	0	-0.67	0	-1.34	0	0	0	0	-24.68	-17.76	6.92
rab5if	11	8.79	0	0	0	0	0	0	0	0	0	-7.06	-0.16	6.9
ndufab1a	6	-0.73	0	0	-32.65	-6.06	-17.58	0	0	0	0	-44.46	-37.57	6.89
CT027744.2	11	79.15	10.44	4	5.7	0	0	0.17	0	0	0	-13.28	-6.39	6.89
znf865	6	0	0	0	0	0	0	0	0	0	0	-6.85	0	6.85
ngly1	6	0	0	0	-4.32	0	0	0	-2.92	0	0	-19.08	-12.23	6.85
vps26a	6	0	0	0	0	0	0	0	0	0	0	-9.15	-2.33	6.82
coro1a	11	91.55	14.48	0	0	0	0	0	0	0	0	-6.8	0	6.8
hp1bp3	6	0	0	0	0	0	0	0	2.94	0	0	-6.8	0	6.8
dusp7	6	-2.56	0	0	0	0	0	0	0	0	0	-13.37	-6.58	6.79
si:dkey-56i24.1.1	12	5.03	0	0	0	4.22	0	0	0	0	0	1.5	8.28	6.78
CU019662.1	6	0	0	0	0	0	0	0	-2.66	0	0	-42.39	-35.62	6.77
tp53	13	-53.35	0	-3.92	-14.38	0	-2.63	0	-8.01	0	0	-19.37	-12.61	6.76
pet100	6	-1.38	0	0	-9.15	-6.21	-2.11	0	0	0	0	-11.64	-4.89	6.75
rnf216	6	0	0	0	0	-3.9	0	0	0	0	0	-16.89	-10.16	6.73
si:ch211-214b16.3	6	0	0	0	0	0	0	0	0	0	0	-20.17	-13.45	6.72
vrk1	6	0	0	0	0	0	0	0	0	0	0	-6.71	0	6.71
c1qc	5	143.04	173.74	40.54	162.83	117.81	67.47	34.25	112.48	0	0	72.22	78.91	6.69
ppifb	5	-0.35	9.02	0	-2.38	-4.89	0	0	0	0	0	-6.67	0	6.67
nsa2	5	0	34.63	0	14.36	4.72	29.26	3.84	13.47	0	0	-6.66	0	6.66
btg2	8	0	-1.66	9.61	16.18	0	21.18	0	11.63	0	0	0	6.65	6.65
pdcl	6	0	0	0	0	0	0	0	0	0	0	-22.89	-16.25	6.64
vps37a	6	0	0	0	0	0	0	0	0	0	0	-10.64	-4.01	6.63
stk10	6	0	0	0	0	0	0	0	0	0	0	-11.32	-4.7	6.62
prkx	6	0	0	0	0	0	0	0	0	0	0	-11.81	-5.22	6.59
prrc2a	6	0	0	0	0	0	0	0	0	0	0	-17.54	-10.96	6.58
tefa	6	-18.65	0	-0.55	-1.07	-6.75	0	0	0	0	0	-6.55	0	6.55
lclat1	6	0	0	0	0	0	0	0	0	0	0	-9.79	-3.25	6.54
sec13	6	0	0	0	0	-0.54	-1.01	0	0	0	0	-17.08	-10.55	6.53
ndufa6	6	0	1.48	0	-9.36	-0.09	-3.7	0	0	0	0	-8.7	-2.2	6.5
si:ch211-255g12.8	6	-1.2	0	0	0	-0.38	0	0	0	0	0	-37.14	-30.69	6.45
psmd12	6	5.26	0	0	0	0	0	0	0	0	-0.2	-19.75	-13.31	6.44
atp5po	6	-5.9	0	0	-14.12	-4.79	-3.41	0	0	0	0	-22.67	-16.28	6.39
ran	5	0	16.19	0	0	-10.76	0	0	0	0	0	-6.39	0	6.39
mmp25b	10	0	0	0	0	0	0	0	-15.66	0	0	0	6.36	6.36
acp6	6	0	0	0	0	-2.36	-0.8	0	0	0	0	-16.5	-10.14	6.36
fem1c	6	0	0	0	0	0	0	0	0	0	0	-11.22	-4.87	6.35
stip1	6	0	0	0	0	0	0	0	0	0	0	-13.95	-7.6	6.35
brk1	6	2.85	0	0	0	0	0	0	0	0	0	-12.78	-6.44	6.34
chia.6	10	0	0	0	0	-2.51	0	0	-29.46	0	0	14.14	20.43	6.29
irge4	6	-1.5	0	-0.75	0	0	0	0	0	0	0	-65.42	-59.14	6.28
tango2	6	0	0	0	0	0	0	0	0	0	0	-15.5	-9.27	6.23
rraga	6	-0.23	0	0	0	0	0	0	0	0	0	-11.61	-5.38	6.23
commd9	6	0	0	0	0	0	0	0	0	0	0	-15.44	-9.22	6.22
ppp1cb	6	0	0	0	0	0	0	0	0	0	0	-25.55	-19.34	6.21
pdpk1b	6	0	0	0	0	0	0	0	0	0	0	-6.15	0.06	6.21
naa50	6	3.45	0	0	0	0	0	0	0	0	0	-10.31	-4.15	6.16
nono	6	0	0	0	0	0	0	0	0	0	0	-9.71	-3.56	6.15
rnf111	6	0	0	0	0	0	0	0	0	0	0	-14.48	-8.33	6.15
pik3c2a	6	0	0	0	0	0	0	0	0	0	0	-27.84	-21.69	6.15
cab39l1	10	0	0	0	0	0	0	0	-17.72	0	0	-6.17	-0.03	6.14
lyn	9	-6.5	-9.67	0	-0.99	0	0	0	0	0	0	-6.13	0	6.13
gsk3ab	6	0	0	0	0	0	0	0	0	0	0	-13.3	-7.18	6.12
cnot2	6	0	0	0	0	0	0	0	0	0	0	-9.1	-3.02	6.08
lin52	6	2.97	0	0	0	0	0	0	0	0	0	-6.8	-0.74	6.06
dctn3	6	0	0	0	0	0	0	0	0	0	0	-16.89	-10.84	6.05
glrx3	6	0	0	0	-3.01	0	0	0	0	0	0	-16.9	-10.87	6.03
STMP1	6	0	3.18	0	0	0	-0.33	0	0	0	0	-10.94	-4.92	6.02
lta4h	5	0	12.11	0	-0.36	-1.59	0	1.54	0	0	0	0	6.01	6.01
uba3	6	0	0	0	0	0	0	0	0	0	0	-12.23	-6.28	5.95
pdzd8	6	-29.68	0	-0.43	-1.01	-1.33	0	0	-31.16	0	0	-24.06	-18.13	5.93
hcfc1b	6	0	0	0	0	0	0	0	0	0	0	-10.54	-4.63	5.91
si:ch211-9d9.1	16	-24.34	0	-7.88	-77.38	-16.97	-3.33	-1.69	-27.41	0	0	0	5.89	5.89
ccdc22	6	0	0	0	0	0	0	0	0	0	0	-4.64	1.24	5.88
slc25a24	6	11.29	0	0	0	0	0	0	0	0	0	-47.17	-41.32	5.85
mrps6	6	0	0	0	-1.93	0	0	0	1.31	0	0	-9.42	-3.67	5.75
smap2	12	0	0	0	0	0	0	0	-1.4	0	0	0	5.74	5.74
CR383676.3	6	0	0	0	0	0	0	0	0	0	0	-5.43	0.3	5.73
gpr137	6	0	0	0	0	0	0	0	0	0	0	-5.71	0	5.71
si:ch73-186j5.2	6	0	0	0	0	0	0	0	0	0	0	-5.71	0	5.71
ucp2	6	12.82	7.72	0	0	0	0	0	0	0	0	-22.4	-16.7	5.7
kmt2a	6	0	0	0	0	0	0	0	0	0	0	-5.69	0	5.69
glmp	6	0	0	0	0	0	0	0	0	0	0	-17.23	-11.58	5.65
akirin2	6	0	0	0	0	0	0	0	0	0	0	-15.55	-9.93	5.62
vps36	6	-3.35	0	0	-1	0	0	0	-8.35	0	0	-23.35	-17.73	5.62
FBXO46	6	0	0	0	0	0	0	0	0	0	0	-14.11	-8.49	5.62
si:ch73-281n10.2	6	0	0	0	0	0	0	0	0	0	0	-13.84	-8.22	5.62
inpp5ka	6	-7.08	0	0	-0.63	-1.12	0	0	0	0	0	-5.58	0	5.58
znf292b	6	-5.5	0	0	0	-1.06	0	0	0	0	0	-17.97	-12.4	5.57
eif4eb	6	0	0	0	0	0	0	0	0	0	0	-15.14	-9.61	5.53
si:ch211-191j22.3	6	0	0	0	0	0	0	0	0	0	0	-6.79	-1.26	5.53
yrk	6	0	0	-1.68	-4.74	0	0	0	0	0	0	-13.24	-7.71	5.53
gsk3ba	6	0	0	0	0	0	0	0	0	0	0	-27.08	-21.56	5.52
zgc:162730	5	-10.49	56.8	0	2.85	0	0	0	2.55	0	0	-17.51	-12.03	5.48
elocb	6	0	0	0	-0.47	0	-0.69	0	0	0	0	-13.66	-8.2	5.46
ap3s2	6	0	0	0	-1.63	0	0	0	0	0	0	-17.18	-11.72	5.46
ube2z	6	0	0	0	0	0	0	0	0	0	0	-12.53	-7.07	5.46
mibp2	8	0	0	0	20.4	13.91	25.56	0	8.3	0	0	-5.44	0	5.44
mob1a	6	-0.96	0	0	0	0	0	0	0	0	0	-11.18	-5.75	5.43
rpl5b	8	0	0	8.81	14.05	1.65	18.31	0	19.65	0	0	-5.42	0	5.42
dtnbp1a	6	-8.36	0	-4.2	-6.44	0	0	0	0	0	0	-13.43	-8.02	5.41
samd13	6	0	0	0	0	0	0	0	0	0	0	-16.42	-11.04	5.38
u2af1	6	0	0	0	0	-2.5	0	0	0	0	0	-23.47	-18.09	5.38
sema4e	6	0	0	0	0	0	0	0	0	0	0	-25.51	-20.14	5.37
syncrip	6	0	0	0	0	0	0	0	0	0	0	-5.14	0.22	5.36
ppp2r5eb	6	0	0	0	0	0	0	0	0	0	0	-7.07	-1.72	5.35
banf1	6	6.84	0	0	0	0	0	0	0	0	0	-12.68	-7.36	5.32
gale	6	-5.56	0	-2.05	-1.98	-0.02	-4.06	0	-2.93	0	0	-14.99	-9.68	5.31
metrnla	6	0	0	0	0	4.57	0	0	0	0	0	-5.3	0	5.3
puf60b	6	0	0	0	0	-3.05	0	0	0	0	0	-10.85	-5.56	5.29
slc12a2	6	0	0	0	-2.59	0	0	0	0.61	0	0	-5.29	0	5.29
FOXK2	6	0	0	0	0	0	0	0	0	0	0	-5.27	0	5.27
foxk2	6	0	0	0	0	0	0	0	0	0	0	-5.27	0	5.27
faua	5	3.64	135.87	20.46	26.99	0	2.62	2.89	44.89	0	0	-5.24	0	5.24
numb	6	0	0	0	0	0	0	0	0	0	0	-8.9	-3.67	5.23
psmd9	6	0	0	0	0	0	0	0	0	0	0	-20.28	-15.06	5.22
ptprea	6	3	0	0	0	0.88	0	0	0	0	0	-19.11	-13.89	5.22
map7d3	6	-2.41	0	0	0	-3.96	-0.5	0	0	0	0	-15.41	-10.2	5.21
slc9a3r1a	11	22.66	0	0	0	0	0	0	0	0	0	-5.2	0	5.2
ywhae1	6	0	1.77	0	0	0	-4.71	0	0	0	0	-31.96	-26.78	5.18
esyt2a	6	0	0	0	0	0	-0.28	0	-13.94	0	0	-16.29	-11.13	5.16
rpl18a	5	19.74	72.51	16.94	71.19	25.53	47.52	0	42.28	0	0	-5.15	0	5.15
hsd17b14	13	-51.69	0	-4.02	-20.55	0	-0.01	0	-8.49	0	0	-18.33	-13.18	5.15
kdm5c	6	0	0	0	0	0	0	0	0	0	0	-11.74	-6.63	5.11
cnppd1	6	0	0	0	0	0	0	0	0	0	0	-11.86	-6.76	5.1
atpv0e2	6	0	0	0	0	-1.19	0	0	0	0	0	-19.99	-14.9	5.09
nedd9	6	0	0	0	0	0	0	0	-2.79	0	0	-22.51	-17.43	5.08
dck	6	0	0	0	0	-4.32	0	0	0	0	0	-17.21	-12.13	5.08
pdcd10a	11	11.91	0.7	1.24	0.38	3.07	0	0	0	0	0	-10.66	-5.59	5.07
si:ch1073-314i13.4	6	-0.77	0	0	-1.97	-4.14	0	0	0	0	0	-10.16	-5.09	5.07
tnrc6b	6	-5.19	0	0	-1.86	0	-1.3	0	0	0	0	-18.34	-13.27	5.07
si:ch211-105j21.9	17	0	0	0	-0.93	-26.35	0	0	-12.27	0	0	0	5.04	5.04
micos10	6	0	0	-1.52	-10.87	-5.35	-11.9	0	0	0	0	-23.07	-18.05	5.02
gadd45ba	5	0	17.9	0	0	0	0	0	0	0	0	-9.98	-5.02	4.96
mctp2b	12	0	0	0	0	0	0	0	0	0	0	3.62	8.57	4.95
si:ch211-132p1.3	6	0	24.27	0	2.86	0	0	0	3.74	0	0	-35.99	-31.06	4.93
rab14	6	-6.09	0	0	0	0	0	0	0	0	0	-12.95	-8.06	4.89
herpud1	6	-15.67	0	0	-2.07	-8.38	0	0	0	0	0	-8.64	-3.78	4.86
hcls1	11	12.23	0	0	0	0	0	0	0	0	0	-10.02	-5.19	4.83
vaspa	17	0	0	0	0	-19.18	-6.57	0	-0.89	0	0	-12.38	-7.57	4.81
niban1b	6	0	0	0	0	0	0	0	0	0	0	-19.31	-14.51	4.8
fahd2a	6	0	0	0	0	0	0	0	0	0	0	-4.79	0	4.79
exoc2	6	0	0	0	0	0	0	0	0	0	0	-13.93	-9.15	4.78
dub	17	0	0	0	0	-9.64	0	0	0	0	-0.22	-3.08	1.69	4.77
h1-10	9	13.28	-7.65	3.58	2.02	1.08	4.5	0	0	0	0	0	4.77	4.77
lbr	12	0	0	0	0	0	0	0	0	0	0	0	4.77	4.77
fundc2	6	-8.15	0	0	-8.46	0	-0.2	0	0	0	0	-88.81	-84.06	4.75
rtf2	6	0	0	0	0	0	0	0	0	0	0	-14.78	-10.04	4.74
si:dkey-183c2.4	12	0	0	0	0	1.68	0	0	0	0	0	0	4.73	4.73
scamp3	6	-10.88	0	0	0	0	0	0	-0.03	0	0	-12.63	-7.92	4.71
eif3f	2	0	75.49	4.59	7.25	0	8.57	0	14.56	0	0	-4.7	0	4.7
arg2	17	-10.78	2.71	-2.64	-36.89	-34.82	-6.96	0	-4.18	0	0	0	4.69	4.69
pigrl4.2	12	0	0	0	0	0	0	0	0	0	0	0.32	4.99	4.67
luc7l3	11	11.6	0	0	0	0	0	0	0	0	0	-4.65	0	4.65
fbxo11a	6	-2.3	0	0	0	0	0	0	0	0	0	-10.8	-6.21	4.59
soul4	6	-1.49	0	0	0	0	0	0	0	0	0	-18.4	-13.81	4.59
malt2	6	-1.39	0	0	0	-6.58	0	0	0	0	0	-18.33	-13.75	4.58
rpl29	5	-2.89	26.61	2.75	0	-0.78	0	0	11.65	0	0	-5.23	-0.66	4.57
zgc:55558	12	0	0	0	0	0	0	0	0	0	0	0	4.57	4.57
rpz2	6	5.28	0	0	0	0	0	0	0	0	0	-17.54	-12.98	4.56
pdap1a	11	17.01	0	0	0	0	0	0	0	0	0	0	4.54	4.54
pop7	6	0	0	0	-1.95	-2.01	-4.53	0	0	0	0	-29.1	-24.6	4.5
nbr1b	6	0	0	0	0	0	0	0	0	0	0	-24.81	-20.32	4.49
ddit3	9	0	-19.87	0	0	0	0	0	0	0	0	-14.78	-10.3	4.48
mrps24	6	0	0	0	-2.87	-1.55	-5.85	0	0	0	0	-16.06	-11.59	4.47
osbpl3b	10	0	0	0	0	0	0	0	-23.4	0	0	-14.92	-10.46	4.46
SLC9A1	12	0	0	0	0	0	1.22	0	0	0	0	0	4.44	4.44
akirin1	6	0	0	0	0	0	0	0	0	0	0	-31.41	-26.98	4.43
psenen	6	-5.16	0	0	-3.82	0	0	0	0	0	0	-13.84	-9.41	4.43
kat8	6	0	0	0	0	0	0	0	0	0	0	-9.25	-4.85	4.4
caprin1a	6	0	0	0	0	0	0	0	0	0	0	-21.13	-16.73	4.4
si:ch211-22i13.2	6	-10.17	0	0	-14.36	0	-3.17	0	0	0	0	-34.3	-29.9	4.4
tsg101b	12	0	0	0	0	0	0	0	0	0	0	0	4.39	4.39
adam10a	6	0	0	0	0	0	0	0	0	0	0	-4.32	0	4.32
ddx6	6	0	0	0	0	0	0	0	0	0	0	-9.87	-5.56	4.31
hopx	6	0	0	0	-3.48	0	-2.75	0	-5.39	0	0	-13.51	-9.21	4.3
bcl2l1	6	-1.03	0	0	0	0	0	0	-2.96	0	0	-19.6	-15.32	4.28
clcn7	13	-72.02	0	-10.83	-24.86	0	-8.83	0	-13.26	0	0	-25.79	-21.52	4.27
agpat9l	6	0	0	0	0	0	0	0	0	0	0	-4.25	0	4.25
bcl7bb	6	0	0	0	0	-2.97	0	0	0	0	0	-29.57	-25.32	4.25
itpkcb	12	-0.07	0	0	0	0	0	0	0	0	0	0	4.2	4.2
psmg1	6	0	0	0	0	0	-0.34	0	0	0	0	-15.66	-11.49	4.17
pfn2	11	17.87	0	0	0	3.81	0	0	0	0	0	-14.26	-10.12	4.14
ndufb3	6	-20.84	5.77	-0.63	-7.7	0	-6.62	0	0	0	0	-17.36	-13.23	4.13
cica	6	0	0	0	0	0	0	0	0	0	0	-14.47	-10.35	4.12
rpl17	5	21.68	148.93	36.1	56.79	9.41	12.11	7.36	69.96	0	0	0	4.11	4.11
ufsp2	6	0	0	0	0	0	0	0	0	0	0	-14.86	-10.78	4.08
cisd2	6	0	0	0	0	-2.37	0	0	0	0	0	-23.99	-19.91	4.08
sh3gl1a	6	0	0	0	0.01	0	0	0	0	0	0	-7.87	-3.81	4.06
si:dkey-25e12.3	6	-1.11	0	-0.05	0	0	0	0	0	0	0	-14.24	-10.19	4.05
chfr	6	0	0	0	0	0	0	0	0	0	0	-8.94	-4.9	4.04
cnpy3	12	0	0	0	0	0	0	0	0	0	0	0	4	4
picalma	6	0	0	0	0	0	0	0	0	0	0	-10.22	-6.24	3.98
ilf3b	6	13.22	0	0	0	0	0	0	0	0	0	-25.42	-21.5	3.92
ccni	8	0	0	0	0	0	25.73	0.49	-3.41	0	2.66	0	3.89	3.89
smarca4a	6	0	0	0	0	0	0	0	0	0	0	-27.86	-24	3.86
ahr2	10	-11.1	-12.6	0	0	0	0	0	-34.62	0	0	-10.1	-6.29	3.81
h2az2b	6	-5.44	0	0	0	0	0	0	0	0	0	-83.75	-79.96	3.79
id3	6	-10.74	3.04	0	-1.48	-10.66	0	0	-0.45	0	0	-9.59	-5.84	3.75
rps3a	5	45.58	126.62	32.28	44.54	3.81	8.39	5.49	62.38	0	0	-3.45	0.29	3.74
rnf128a	6	-6.66	0	0	-1.34	0	0	0	-1.65	0	0	-11.96	-8.23	3.73
yipf6	6	0	0	0	0	0	0	0	0	0	0	-19.69	-15.96	3.73
gpr108	6	0	0	0	0	0	0	0	0	0	0	-3.7	0	3.7
zgc:158463	9	0	-17.13	0	0	0	0	0	0	0	0	-3.69	0	3.69
tacc1	12	0	0	0	0	0.54	0	0	0	0	0	0	3.68	3.68
usp7	6	0	0	0	0	0	0	0	0	0	0	-11.5	-7.82	3.68
tln1	9	7.82	-7.13	0	0	6.17	0	0	0	0	0	2.18	5.83	3.65
cflarb	6	-5.31	0	-2.55	0	0	0	0	0	0	0	-32.89	-29.3	3.59
brd8	6	0	0	0	-1.96	0	0	0	0	0	0	-11.17	-7.62	3.55
BRD8	6	0	0	0	-1.96	0	0	0	0	0	0	-11.17	-7.62	3.55
eif4ebp2	11	4.31	0.66	0	0	0.83	0	0	0	0	0	-3.55	0	3.55
plecb	11	30.36	0	0	0.58	17.03	0	0	0	0	0	-23.66	-20.14	3.52
bbx	6	0	0	0	0	0	0	0	0	0	0	-10.11	-6.6	3.51
tm9sf5	6	0	0	0	0	0	0	0	0	0	0	-10.96	-7.48	3.48
hyal2b	12	0	0	0	0	0	0	0	0	0	0	0	3.47	3.47
h2ax1	11	39.18	-8.13	5.38	11.53	5.6	2.26	0	0	0	0	-3.46	0	3.46
ipo7	11	14.43	0	0	5.5	0	0	0	0	0	0	0	3.46	3.46
ddx39ab	6	0	0	0	-3.58	-11.1	-10.59	0	0	0	0	-30.99	-27.56	3.43
ksr1b	6	-12.27	0	0	-0.56	-5.94	0	0	0	0	0	-39.13	-35.7	3.43
ndrg1a	6	-12.78	0	0	0	0	0	0	0	0	0	-21.87	-18.49	3.38
cd99	11	23.75	9.81	5.54	8.79	26.78	0	0	7.13	0	0	0	3.38	3.38
parga	6	0	0	0	-4.33	0	0	0	0	0	0	-33.85	-30.48	3.37
kdm1a	6	0	0	0	0	0	0	0	0	0	0	-9.61	-6.25	3.36
nudc	6	0	0	0	-3.66	-6.46	-7.91	0	0	0	0	-19.27	-15.91	3.36
pbdc1	6	0	0	0	0	0	0	0	0	0	0	-3.31	0	3.31
tia1	12	0	0	0	0	0	0	0	0	0	0	0	3.28	3.28
pum1	6	0	0	0	0	0	0	0	0	0	0	-8.09	-4.82	3.27
atg5	6	-4.02	0	0	-0.71	0	0	0	0	0	0	-12.42	-9.18	3.24
golga1	12	0	0	0	0	0	0	0	0	0	0	0	3.23	3.23
phtf1	11	13.19	0	0	0.16	0	0	0	0	0	0	0	3.23	3.23
rsl1d1	5	5.47	8.47	8.64	13.82	0	16.62	4.4	8.6	0	0	0	3.23	3.23
jdp2b	5	4.34	50.01	0	5.46	0	0	0	21.54	0	0	-3.22	0	3.22
tnpo2	6	0	0	0	0	0	0	0	0	0	0	-13.6	-10.38	3.22
TNPO2	6	0	0	0	0	0	0	0	0	0	0	-13.6	-10.38	3.22
fam49bb	6	0	0	0	0	0	0	0	0	0	0	-14.97	-11.77	3.2
rpl21	5	2.04	116.16	20.1	37.53	0.35	9.1	2.43	53.37	0	0	-3.2	0	3.2
rpl32	8	0	7.33	13.04	12.38	0	21.26	0	17.41	0	0	-3.16	0	3.16
trpc4apa	6	0	0	0	0	0	0	0	0	0	0	-8.58	-5.47	3.11
mroh1	13	-44.95	0	0	-1.34	0	0	0	0	0	0	-3.1	0	3.1
gins4	12	0	0	0	0	-1.77	0	0	0	0	0	2.68	5.74	3.06
traf7	6	0	0	0	-2.56	-0.62	0	0	0	0	0	-10.93	-7.87	3.06
btf3	2	0	126.38	8.5	24.87	5.54	19.25	14.95	28.84	0	4.22	0	3.04	3.04
ppp1r15a	13	-4.36	0	0	0	0	0	0	0	0	0	0	2.97	2.97
cdc34b	6	0	0	0	0	0	0	0	0	0	0	-19.34	-16.37	2.97
man2a1	6	-0.03	0	0	0	0	0	0	0	0	0	-7	-4.05	2.95
rpl10	2	3.31	124.12	15.99	40.33	1.34	17.74	2.54	20.92	0	0	-2.92	0	2.92
arrdc3a	6	0	0	0	0	0	0	0	0	0	0	-11.74	-8.86	2.88
rhoac	6	0	0	0	0	0	0	0	-1.37	0	0	-14.9	-12.02	2.88
fam210b	7	30.26	0	0	16.83	10.34	0	0	0	0	0	-2.88	0	2.88
pabpc1a	8	0	4.48	8.17	0.46	0	9.45	0.9	7.59	0	0	3.14	6	2.86
eif4g2a	12	0	0	0	0	0	0	0	0	0	0	0	2.81	2.81
atp5if1a	6	-7.75	2.15	0	-21.8	-3.93	-9.5	0	0	0	0	-10.99	-8.2	2.79
hgsnat	13	-23.95	0	0	-26.47	-7.58	-2.63	0	-9.67	0	0	-6.77	-4.02	2.75
sgpl1	6	-5.98	0	-3.94	0	0	0	0	0	0	0	-12.55	-9.81	2.74
eef1da	5	0	50.02	8.86	25.64	4.7	40.27	0	37.87	0	0	0	2.72	2.72
pitpnb	12	0.57	0	0	0	0	0	0	0	0	0	0	2.69	2.69
spcs2	6	0	0	0	0	0	0	0	0	0	0	-2.69	0	2.69
stam2	6	-0.66	0	0	-1.65	0	-0.9	0	0	0	0	-8.55	-5.9	2.65
stat5a	11	6.56	0	0	0	1.87	0	0	0	0	0	-8.3	-5.65	2.65
mapk11	12	5.71	0	2.95	0	0	0	0	4.32	0	0	1.66	4.29	2.63
arid1b	6	-0.39	0	0	-4.54	0	0	0	0	0	0	-14.84	-12.22	2.62
COX7A2	6	0	0	0	0	0	0	0	0	0	0	-33.79	-31.18	2.61
rbx1	6	0	0.39	-1.88	-19.75	-1.94	-17.72	0	0	0	0	-37.17	-34.56	2.61
cacybp	6	0	0	0	0	0	-0.43	0	-1.24	0	0	-30.31	-27.73	2.58
tia1l	12	0	0	0	0	0	0	0	0	0	0	0	2.55	2.55
ptprr	12	0	0	0	0	0	0	0	0	0	0	0	2.54	2.54
cylda	6	-28.12	0	0	-13.02	-0.11	-3.02	0	0	0	0	-20.07	-17.55	2.52
hs6st1b	12	0	0	0	0	0	0	0	0	0	0	0	2.5	2.5
zmp:0000001139	12	0	0	0	0	0	0	0	0	0	0	0	2.5	2.5
ehbp1l1b	6	-5.53	-2.46	0	0	0	0.45	0	-3.46	0	0	-8.56	-6.1	2.46
nedd8	6	0	0	0	-2.57	0	-2.91	0	0	0	0	-20.64	-18.18	2.46
eef2b	5	0	30.26	21.99	18.24	11.92	24.44	4.85	30.71	0	0	0	2.44	2.44
slc25a55a	6	-5.52	0	0	0	-1.22	0	0	0	0	0	-10.24	-7.81	2.43
nampta	12	0	0	0	0	0	0	0	0	0	0	0	2.41	2.41
lmnb2	6	0	0	0	0	0	0	0	0	0	0	-12.88	-10.51	2.37
myl7	12	12.26	3.22	0	2.68	0	0	0	0	0	0	17.57	19.94	2.37
tbl1xr1b	6	0	0	0	0	0	0	0	0	0	0	-8.38	-6.01	2.37
dnajc5gb	6	0	0	0	0	0	0	0	0	0	0	-11.46	-9.12	2.34
cbsb	6	0	0	0	0	0	0	0	0	0	0	-11.28	-8.94	2.34
pdlim1	16	-0.11	0	0	-12.61	-7.12	-15.28	0	0	0	0	-7.24	-4.91	2.33
rab18b	6	0	0	0	0	0	0	0	0	0	0	-8.08	-5.76	2.32
arfgap2	7	5.01	0	0	6.74	4.52	0	0	0	0	0	0	2.32	2.32
zgc:100829	6	0	0	0	0	0	0	0	0	0	0	-39.98	-37.67	2.31
gpx4b	11	6.69	7.65	0	0	14	0	0	0.65	0	0	-13.3	-11	2.3
smarce1	6	0.48	0	0	0	0	0	0	0	0	0	-15.75	-13.45	2.3
samsn1b	6	0	0	0	0	0	0	0	0	0	0	-10.29	-8	2.29
nars1	6	0	0	0	0	0	0	0	0	0	0	-15.91	-13.65	2.26
zgc:153441	12	0	0	0	0	0	0	0	0	0	0	0	2.25	2.25
atp6v1c1a	6	-2.79	0	-0.39	-19.68	0	-4.06	0	-0.41	0	0	-26.9	-24.68	2.22
si:dkey-42l23.9	6	0	0	0	0	0	0	0	0	0	0	-2.21	0	2.21
SERP1	5	16.46	40.62	2.1	24.45	22.14	26.28	8.91	33.62	0	0.35	0	2.16	2.16
serp1	5	16.46	40.62	2.1	24.45	22.14	26.28	8.91	33.62	0	0.35	0	2.16	2.16
BX548046.2	6	0	0	0	0	0	0	0	0	0	0	-2.15	0	2.15
eif2s1a	12	1.79	0	0	0	0	0	0	0	0	0	0	2.09	2.09
adam28	13	-17.81	0	-9.8	-6.95	0	-0.8	0	-11.31	0	0	0	2.05	2.05
cnot8	6	0	0	0	0	0	0	0	0	0	0	-6.6	-4.56	2.04
tcea1	6	0	0	0	0	0	0	0	0	0	0	-13.36	-11.35	2.01
pdcd6	6	0	0	0	-1.02	0	-0.36	0	0	0	0	-45.26	-43.26	2
alox5a	12	0	0	0	0	0	0	0	0	0	0	0	1.99	1.99
kdm3b	6	0	0	0	0	0	0	0	0	0	0	-11.9	-9.92	1.98
fam43a	6	-11.45	0	0	0	-3.72	0	0	-14.99	0	0	-13.59	-11.62	1.97
[truncated: 3,453 more rows]

## Sheet: GO and KEGG
Dendrogram 2
geneSet	description	link	size	overlap	expect	enrichmentRatio	pValue	FDR	overlapId	userId
GO:0072593	reactive oxygen species metabolic process	http://amigo.geneontology.org/amigo/term/GO:0072593	30	4	0.111124	35.9957	3.94725e-06	0.00112102	30216;393770;445037;497166	hbba1;hbaa2;hbba2;romo1
GO:0009308	amine metabolic process	http://amigo.geneontology.org/amigo/term/GO:0009308	30	3	0.111124	26.9968	0.000174622	0.022266	259192;259193;431716	sat1a.2;oaz1b;oaz1a
GO:0042493	response to drug	http://amigo.geneontology.org/amigo/term/GO:0042493	155	5	0.574143	8.70864	0.000235204	0.022266	30216;393558;445037;497162;497166	hbba1;si:ch211-5k11.8;hbaa2;hbba2;mb
GO:0051186	cofactor metabolic process	http://amigo.geneontology.org/amigo/term/GO:0051186	185	5	0.685267	7.29643	0.000532535	0.03781	30216;445037;497166;563855;791518	hbba1;hmox1a;chac1;hbaa2;hbba2
Dendrogram 3
geneSet	description	link	size	overlap	expect	enrichmentRatio	pValue	FDR	overlapId	userId
dre04142	Lysosome	http://www.kegg.jp/kegg-bin/show_pathway?dre04142+140811+321818+406486+548343+550529+798347	146	6	0.936213	6.4088	0.000290555	0.0470699	140811;321818;406486;548343;550529;798347	ctsa;gm2a;psap;glb1;tpp1;m6pr
Dendrogram 5
geneSet	description	link	size	overlap	expect	enrichmentRatio	pValue	FDR	overlapId	userId
GO:0009059	macromolecule biosynthetic process	http://amigo.geneontology.org/amigo/term/GO:0009059	1852	58	18.4251	3.14787	0	0	30493;30516;30722;114420;192299;192301;195819;321564;323305;325102;325618;326961;327341;334626;336568;336641;336662;336687;336713;336764;336812;337148;337240;337810;378961;393686;393710;393725;393818;393974;394027;394035;394097;394194;406402;406464;406489;406565;406686;407690;415168;415169;415229;436760;436766;436895;445038;445040;445306;449547;550245;554155;558312;560745;677758;767765;796380;100…	rps2;rps3a;eif3g;rack1;eef1db;eif5a;rps8a;rpl18a;rpl5a;rpl8;rps9;eif3ba;eef1a1l1;eif2s3;eif3s6ip;eif3ha;rps15a;eif3m;rpl19;faua;rpl10a;rpl17;rps7;rpl21;rpl24;eif3k;rps23;rpl29;eif3ea;rpl11;rps27a;rps14;jdp2b;rpl23;rps13;rpsa;rpl13;rpl18;rps27.1;rps4x;rps11;rps16;rps15;rpl35a;rps17;eif2s1b;rpl34;rplp2l;rpl30;rpl31;rpl27;rpl36a;rps26;rpl39;rpl35;rps24;id1;irf8
GO:0034645	cellular macromolecule biosynthetic process	http://amigo.geneontology.org/amigo/term/GO:0034645	1826	58	18.1665	3.1927	0	0	30493;30516;30722;114420;192299;192301;195819;321564;323305;325102;325618;326961;327341;334626;336568;336641;336662;336687;336713;336764;336812;337148;337240;337810;378961;393686;393710;393725;393818;393974;394027;394035;394097;394194;406402;406464;406489;406565;406686;407690;415168;415169;415229;436760;436766;436895;445038;445040;445306;449547;550245;554155;558312;560745;677758;767765;796380;100…	rps2;rps3a;eif3g;rack1;eef1db;eif5a;rps8a;rpl18a;rpl5a;rpl8;rps9;eif3ba;eef1a1l1;eif2s3;eif3s6ip;eif3ha;rps15a;eif3m;rpl19;faua;rpl10a;rpl17;rps7;rpl21;rpl24;eif3k;rps23;rpl29;eif3ea;rpl11;rps27a;rps14;jdp2b;rpl23;rps13;rpsa;rpl13;rpl18;rps27.1;rps4x;rps11;rps16;rps15;rpl35a;rps17;eif2s1b;rpl34;rplp2l;rpl30;rpl31;rpl27;rpl36a;rps26;rpl39;rpl35;rps24;id1;irf8
GO:0044271	cellular nitrogen compound biosynthetic process	http://amigo.geneontology.org/amigo/term/GO:0044271	1806	60	17.9675	3.33936	0	0	30493;30516;30722;81541;114420;192299;192301;195819;321564;323305;325102;325618;326961;327341;334626;336568;336641;336662;336687;336713;336764;336812;337148;337240;337810;378961;378963;393686;393710;393725;393818;393974;394027;394035;394097;394194;406402;406464;406489;406565;406686;407690;415168;415169;415229;436760;436766;436895;445038;445040;445306;449547;550245;554155;558312;560745;677758;7677…	rps2;rps3a;eif3g;rack1;eef1db;eif5a;rps8a;rpl18a;rpl5a;rpl8;rps9;eif3ba;eno3;eef1a1l1;eif2s3;eif3s6ip;eif3ha;rps15a;eif3m;rpl19;faua;rpl10a;rpl17;rps7;rpl21;rpl24;eif3k;rps23;rpl29;eif3ea;rpl11;rps27a;rps14;jdp2b;rpl23;rps13;rpsa;rpl13;rpl18;rps27.1;rps4x;rps11;rps16;atp5mc3b;rps15;rpl35a;rps17;eif2s1b;rpl34;rplp2l;rpl30;rpl31;rpl27;rpl36a;rps26;rpl39;rpl35;rps24;id1;irf8
GO:1901566	organonitrogen compound biosynthetic process	http://amigo.geneontology.org/amigo/term/GO:1901566	744	57	7.40189	7.70073	0	0	30516;30722;81541;114420;192299;192301;195819;321564;323305;325102;325618;326961;327341;334626;336568;336641;336662;336687;336713;336764;336812;337148;337240;337810;378961;378963;393686;393710;393725;393818;393974;394027;394035;394097;394194;406402;406464;406489;406565;406686;407690;415168;415169;415229;436760;445038;445040;445306;449547;550245;554155;558312;560745;677758;767765;796380;100000341	rps2;rps3a;eif3g;rack1;eef1db;eif5a;rps8a;rpl18a;rpl5a;rpl8;rps9;eif3ba;eno3;eef1a1l1;eif2s3;eif3s6ip;eif3ha;rps15a;eif3m;rpl19;faua;rpl10a;rpl17;rps7;rpl21;rpl24;eif3k;rps23;rpl29;eif3ea;rpl11;rps27a;rps14;rpl23;rps13;rpsa;rpl13;rpl18;rps27.1;rps4x;rps11;rps16;atp5mc3b;rps15;rpl35a;rps17;eif2s1b;rpl34;rplp2l;rpl30;rpl31;rpl27;rpl36a;rps26;rpl39;rpl35;rps24
GO:0043603	cellular amide metabolic process	http://amigo.geneontology.org/amigo/term/GO:0043603	405	55	4.02926	13.6502	0	0	30516;30722;114420;192299;192301;195819;321564;323305;325102;325618;326961;327341;334626;336568;336641;336662;336687;336713;336764;336812;337148;337240;337810;378961;393686;393710;393725;393818;393974;394027;394035;394097;394194;406402;406464;406489;406565;406686;407690;415168;415169;415229;436760;445038;445040;445306;449547;550245;554155;558312;560745;677758;767765;796380;100000341	rps2;rps3a;eif3g;rack1;eef1db;eif5a;rps8a;rpl18a;rpl5a;rpl8;rps9;eif3ba;eef1a1l1;eif2s3;eif3s6ip;eif3ha;rps15a;eif3m;rpl19;faua;rpl10a;rpl17;rps7;rpl21;rpl24;eif3k;rps23;rpl29;eif3ea;rpl11;rps27a;rps14;rpl23;rps13;rpsa;rpl13;rpl18;rps27.1;rps4x;rps11;rps16;rps15;rpl35a;rps17;eif2s1b;rpl34;rplp2l;rpl30;rpl31;rpl27;rpl36a;rps26;rpl39;rpl35;rps24
GO:0006518	peptide metabolic process	http://amigo.geneontology.org/amigo/term/GO:0006518	322	55	3.20351	17.1687	0	0	30516;30722;114420;192299;192301;195819;321564;323305;325102;325618;326961;327341;334626;336568;336641;336662;336687;336713;336764;336812;337148;337240;337810;378961;393686;393710;393725;393818;393974;394027;394035;394097;394194;406402;406464;406489;406565;406686;407690;415168;415169;415229;436760;445038;445040;445306;449547;550245;554155;558312;560745;677758;767765;796380;100000341	rps2;rps3a;eif3g;rack1;eef1db;eif5a;rps8a;rpl18a;rpl5a;rpl8;rps9;eif3ba;eef1a1l1;eif2s3;eif3s6ip;eif3ha;rps15a;eif3m;rpl19;faua;rpl10a;rpl17;rps7;rpl21;rpl24;eif3k;rps23;rpl29;eif3ea;rpl11;rps27a;rps14;rpl23;rps13;rpsa;rpl13;rpl18;rps27.1;rps4x;rps11;rps16;rps15;rpl35a;rps17;eif2s1b;rpl34;rplp2l;rpl30;rpl31;rpl27;rpl36a;rps26;rpl39;rpl35;rps24
GO:0043604	amide biosynthetic process	http://amigo.geneontology.org/amigo/term/GO:0043604	319	55	3.17366	17.3301	0	0	30516;30722;114420;192299;192301;195819;321564;323305;325102;325618;326961;327341;334626;336568;336641;336662;336687;336713;336764;336812;337148;337240;337810;378961;393686;393710;393725;393818;393974;394027;394035;394097;394194;406402;406464;406489;406565;406686;407690;415168;415169;415229;436760;445038;445040;445306;449547;550245;554155;558312;560745;677758;767765;796380;100000341	rps2;rps3a;eif3g;rack1;eef1db;eif5a;rps8a;rpl18a;rpl5a;rpl8;rps9;eif3ba;eef1a1l1;eif2s3;eif3s6ip;eif3ha;rps15a;eif3m;rpl19;faua;rpl10a;rpl17;rps7;rpl21;rpl24;eif3k;rps23;rpl29;eif3ea;rpl11;rps27a;rps14;rpl23;rps13;rpsa;rpl13;rpl18;rps27.1;rps4x;rps11;rps16;rps15;rpl35a;rps17;eif2s1b;rpl34;rplp2l;rpl30;rpl31;rpl27;rpl36a;rps26;rpl39;rpl35;rps24
GO:0043043	peptide biosynthetic process	http://amigo.geneontology.org/amigo/term/GO:0043043	284	55	2.82545	19.4659	0	0	30516;30722;114420;192299;192301;195819;321564;323305;325102;325618;326961;327341;334626;336568;336641;336662;336687;336713;336764;336812;337148;337240;337810;378961;393686;393710;393725;393818;393974;394027;394035;394097;394194;406402;406464;406489;406565;406686;407690;415168;415169;415229;436760;445038;445040;445306;449547;550245;554155;558312;560745;677758;767765;796380;100000341	rps2;rps3a;eif3g;rack1;eef1db;eif5a;rps8a;rpl18a;rpl5a;rpl8;rps9;eif3ba;eef1a1l1;eif2s3;eif3s6ip;eif3ha;rps15a;eif3m;rpl19;faua;rpl10a;rpl17;rps7;rpl21;rpl24;eif3k;rps23;rpl29;eif3ea;rpl11;rps27a;rps14;rpl23;rps13;rpsa;rpl13;rpl18;rps27.1;rps4x;rps11;rps16;rps15;rpl35a;rps17;eif2s1b;rpl34;rplp2l;rpl30;rpl31;rpl27;rpl36a;rps26;rpl39;rpl35;rps24
GO:0006412	translation	http://amigo.geneontology.org/amigo/term/GO:0006412	282	55	2.80556	19.604	0	0	30516;30722;114420;192299;192301;195819;321564;323305;325102;325618;326961;327341;334626;336568;336641;336662;336687;336713;336764;336812;337148;337240;337810;378961;393686;393710;393725;393818;393974;394027;394035;394097;394194;406402;406464;406489;406565;406686;407690;415168;415169;415229;436760;445038;445040;445306;449547;550245;554155;558312;560745;677758;767765;796380;100000341	rps2;rps3a;eif3g;rack1;eef1db;eif5a;rps8a;rpl18a;rpl5a;rpl8;rps9;eif3ba;eef1a1l1;eif2s3;eif3s6ip;eif3ha;rps15a;eif3m;rpl19;faua;rpl10a;rpl17;rps7;rpl21;rpl24;eif3k;rps23;rpl29;eif3ea;rpl11;rps27a;rps14;rpl23;rps13;rpsa;rpl13;rpl18;rps27.1;rps4x;rps11;rps16;rps15;rpl35a;rps17;eif2s1b;rpl34;rplp2l;rpl30;rpl31;rpl27;rpl36a;rps26;rpl39;rpl35;rps24
GO:0022613	ribonucleoprotein complex biogenesis	http://amigo.geneontology.org/amigo/term/GO:0022613	204	24	2.02955	11.8253	0	0	192299;192301;323305;325102;326961;327341;334626;336687;336710;337148;393725;393974;394027;394121;406402;407690;415229;436760;445306;550245;554155;563247;767765;796380	rpl7;eif3g;rsl1d1;rps8a;rpl5a;eif3ba;eif2s3;eif3s6ip;eif3ha;eif3m;rpl10a;rps7;rpl24;eif3k;eif3ea;rpl11;rps14;rpsa;rps27.1;rps10;rps16;rps15;rpl35a;rpl35
GO:0002181	cytoplasmic translation	http://amigo.geneontology.org/amigo/term/GO:0002181	50	13	0.497439	26.1339	1.11022e-15	4.04727e-13	325102;327341;334626;336641;393686;393974;406402;436760;445040;445306;550245;677758;796380	eif3g;rpl8;eif3ba;eif2s3;eif3s6ip;eif3ha;eif3m;rpl17;eif3k;rpl29;eif3ea;rpl35a;rpl31
GO:0022618	ribonucleoprotein complex assembly	http://amigo.geneontology.org/amigo/term/GO:0022618	103	16	1.02472	15.614	2.9976e-15	1.0017e-12	192301;325102;326961;327341;334626;336687;337148;393974;394027;394121;406402;415229;445306;550245;554155;796380	eif3g;rpl5a;eif3ba;eif2s3;eif3s6ip;eif3ha;eif3m;rpl24;eif3k;eif3ea;rpl11;rps14;rpsa;rps27.1;rps10;rps15
GO:0071826	ribonucleoprotein complex subunit organization	http://amigo.geneontology.org/amigo/term/GO:0071826	111	16	1.10431	14.4886	1.02141e-14	3.15064e-12	192301;325102;326961;327341;334626;336687;337148;393974;394027;394121;406402;415229;445306;550245;554155;796380	eif3g;rpl5a;eif3ba;eif2s3;eif3s6ip;eif3ha;eif3m;rpl24;eif3k;eif3ea;rpl11;rps14;rpsa;rps27.1;rps10;rps15
GO:0042254	ribosome biogenesis	http://amigo.geneontology.org/amigo/term/GO:0042254	130	16	1.29334	12.3711	1.30562e-13	3.73968e-11	192299;192301;323305;326961;336687;336710;337148;393725;394027;394121;407690;415229;436760;554155;563247;767765	rpl7;rsl1d1;rps8a;rpl5a;rpl10a;rps7;rpl24;rpl11;rps14;rpsa;rps27.1;rps10;rps16;rps15;rpl35a;rpl35
GO:0002183	cytoplasmic translational initiation	http://amigo.geneontology.org/amigo/term/GO:0002183	21	8	0.208924	38.2914	1.32498e-11	3.54213e-09	325102;327341;334626;393974;406402;445306;550245;796380	eif3g;eif3ba;eif2s3;eif3s6ip;eif3ha;eif3m;eif3k;eif3ea
GO:0001732	formation of cytoplasmic translation initiation complex	http://amigo.geneontology.org/amigo/term/GO:0001732	14	7	0.139283	50.2574	2.53391e-11	6.3506e-09	325102;334626;393974;406402;445306;550245;796380	eif3g;eif3ba;eif3s6ip;eif3ha;eif3m;eif3k;eif3ea
GO:0042255	ribosome assembly	http://amigo.geneontology.org/amigo/term/GO:0042255	26	8	0.258668	30.9276	9.76476e-11	2.23876e-08	192301;326961;336687;337148;394027;394121;415229;554155	rpl5a;rpl24;rpl11;rps14;rpsa;rps27.1;rps10;rps15
GO:0006413	translational initiation	http://amigo.geneontology.org/amigo/term/GO:0006413	54	10	0.537234	18.6139	1.00493e-10	2.23876e-08	321564;325102;327341;334626;393974;406402;406464;445306;550245;796380	eif3g;eif5a;eif3ba;eif2s3;eif3s6ip;eif3ha;eif3m;eif3k;eif3ea;eif2s1b
GO:0042274	ribosomal small subunit biogenesis	http://amigo.geneontology.org/amigo/term/GO:0042274	35	8	0.348207	22.9748	1.36666e-09	2.88438e-07	336687;337148;393725;394027;394121;407690;554155;767765	rps8a;rps7;rps14;rpsa;rps27.1;rps10;rps16;rps15
GO:0042273	ribosomal large subunit biogenesis	http://amigo.geneontology.org/amigo/term/GO:0042273	37	8	0.368105	21.7329	2.20549e-09	4.42201e-07	192299;192301;323305;326961;336710;415229;436760;563247	rpl7;rsl1d1;rpl5a;rpl10a;rpl24;rpl11;rpl35a;rpl35
GO:0034622	cellular protein-containing complex assembly	http://amigo.geneontology.org/amigo/term/GO:0034622	406	20	4.0392	4.95147	2.32247e-09	4.43482e-07	192301;325102;326961;327341;334626;336687;337148;393974;394027;394121;406402;415229;436971;445306;550245;554155;793949;796380;798430;799355	pfn1;tmsb4x;eif3g;tmsb1;rpl5a;eif3ba;eif2s3;eif3s6ip;eif3ha;tomm20b;eif3m;rpl24;eif3k;eif3ea;rpl11;rps14;rpsa;rps27.1;rps10;rps15
GO:0044085	cellular component biogenesis	http://amigo.geneontology.org/amigo/term/GO:0044085	1038	31	10.3268	3.00189	1.05953e-08	1.93124e-06	192299;192301;195823;322258;323305;325102;326961;327341;334626;336687;336710;337148;393725;393974;394027;394121;406402;406529;407690;415229;436760;436971;445306;550245;554155;563247;767765;793949;796380;798430;799355	pfn1;tmsb4x;rpl7;eif3g;rsl1d1;tmsb1;rps8a;rpl5a;eif3ba;eif2s3;eif3s6ip;eif3ha;tomm20b;eif3m;naca;rpl10a;rps7;rpl24;eif3k;eif3ea;rpl11;rps14;rpsa;rps27.1;rps10;rps16;rps15;rpl35a;cct5;rpl35;vdac3
GO:0043009	chordate embryonic development	http://amigo.geneontology.org/amigo/term/GO:0043009	318	17	3.16371	5.37344	1.29374e-08	2.25561e-06	192299;192301;195819;326961;336687;336764;337148;337240;393725;406304;407690;415229;436760;445027;449547;497646;558312	sumo2b;rps3a;rps8a;rpl5a;rps15a;gadd45ba;rps7;rpl24;rpl11;rps14;gadd45bb;rps4x;rps15;rpl35a;rplp2l;rpl36a;rpl35
GO:0009792	embryo development ending in birth or egg hatching	http://amigo.geneontology.org/amigo/term/GO:0009792	320	17	3.18361	5.33985	1.42029e-08	2.37306e-06	192299;192301;195819;326961;336687;336764;337148;337240;393725;406304;407690;415229;436760;445027;449547;497646;558312	sumo2b;rps3a;rps8a;rpl5a;rps15a;gadd45ba;rps7;rpl24;rpl11;rps14;gadd45bb;rps4x;rps15;rpl35a;rplp2l;rpl36a;rpl35
GO:0000028	ribosomal small subunit assembly	http://amigo.geneontology.org/amigo/term/GO:0000028	10	5	0.0994878	50.2574	2.13718e-08	3.42804e-06	336687;337148;394027;394121;554155	rps14;rpsa;rps27.1;rps10;rps15
GO:0065003	protein-containing complex assembly	http://amigo.geneontology.org/amigo/term/GO:0065003	524	20	5.21316	3.83644	1.67624e-07	2.58528e-05	192301;325102;326961;327341;334626;336687;337148;393974;394027;394121;406402;415229;436971;445306;550245;554155;793949;796380;798430;799355	pfn1;tmsb4x;eif3g;tmsb1;rpl5a;eif3ba;eif2s3;eif3s6ip;eif3ha;tomm20b;eif3m;rpl24;eif3k;eif3ea;rpl11;rps14;rpsa;rps27.1;rps10;rps15
GO:0006364	rRNA processing	http://amigo.geneontology.org/amigo/term/GO:0006364	87	9	0.865544	10.3981	1.79674e-07	2.66849e-05	192299;323305;336687;336710;393725;394027;407690;563247;767765	rpl7;rsl1d1;rps8a;rpl10a;rps7;rps14;rpsa;rps16;rpl35
GO:0016072	rRNA metabolic process	http://amigo.geneontology.org/amigo/term/GO:0016072	93	9	0.925236	9.72724	3.20758e-07	4.59371e-05	192299;323305;336687;336710;393725;394027;407690;563247;767765	rpl7;rsl1d1;rps8a;rpl10a;rps7;rps14;rpsa;rps16;rpl35
GO:0043933	protein-containing complex subunit organization	http://amigo.geneontology.org/amigo/term/GO:0043933	605	21	6.01901	3.48895	3.83915e-07	5.30862e-05	192301;325102;326961;327341;334626;336687;337148;393974;394027;394121;406402;406464;415229;436971;445306;550245;554155;793949;796380;798430;799355	pfn1;tmsb4x;eif3g;tmsb1;eif5a;rpl5a;eif3ba;eif2s3;eif3s6ip;eif3ha;tomm20b;eif3m;rpl24;eif3k;eif3ea;rpl11;rps14;rpsa;rps27.1;rps10;rps15
GO:0009790	embryo development	http://amigo.geneontology.org/amigo/term/GO:0009790	710	22	7.06363	3.11454	1.32925e-06	0.000177677	30722;192299;192301;195819;326961;336687;336764;337148;337240;393725;394194;406304;407690;415229;436760;445027;449547;497646;558312;793949;796380;799355	sumo2b;pfn1;tmsb4x;rps3a;rack1;rps8a;rpl5a;eif3ba;rps15a;gadd45ba;rps7;rpl24;rpl11;rps14;gadd45bb;rps4x;rps15;rpl35a;rplp2l;rpl36a;rpl35;rps24
GO:0030097	hemopoiesis	http://amigo.geneontology.org/amigo/term/GO:0030097	280	13	2.78566	4.66676	3.76757e-06	0.000487354	192299;195823;325618;334724;336687;393725;394194;406489;415229;436760;436895;445027;554155	sumo2b;anxa1a;rpl19;naca;rps7;rpl11;rps14;rps27.1;rpl35a;rpl27;rpl35;rps24;irf8
GO:0048534	hematopoietic or lymphoid organ development	http://amigo.geneontology.org/amigo/term/GO:0048534	289	13	2.8752	4.52143	5.32795e-06	0.000667659	192299;195823;325618;334724;336687;393725;394194;406489;415229;436760;436895;445027;554155	sumo2b;anxa1a;rpl19;naca;rps7;rpl11;rps14;rps27.1;rpl35a;rpl27;rpl35;rps24;irf8
GO:0002520	immune system development	http://amigo.geneontology.org/amigo/term/GO:0002520	292	13	2.90504	4.47498	5.96261e-06	0.000724547	192299;195823;325618;334724;336687;393725;394194;406489;415229;436760;436895;445027;554155	sumo2b;anxa1a;rpl19;naca;rps7;rpl11;rps14;rps27.1;rpl35a;rpl27;rpl35;rps24;irf8
GO:0006414	translational elongation	http://amigo.geneontology.org/amigo/term/GO:0006414	28	5	0.278566	17.9491	7.23023e-06	0.000852742	30516;30722;406464;558312;560745	rack1;eef1db;eif5a;eef1a1l1;rplp2l
GO:0051726	regulation of cell cycle	http://amigo.geneontology.org/amigo/term/GO:0051726	257	12	2.55684	4.6933	8.64753e-06	0.00099076	30493;30573;192299;195819;334724;336710;336764;378961;393725;406304;407690;497646	anxa1a;rpl7;hsp90ab1;rps8a;rps15a;gadd45ba;rps7;gadd45bb;rpl13;rpl36a;rpl35;id1
GO:0002262	myeloid cell homeostasis	http://amigo.geneontology.org/amigo/term/GO:0002262	75	7	0.746158	9.38139	8.92664e-06	0.000994328	192299;325618;334724;336687;415229;436760;554155	anxa1a;rpl11;rps14;rps27.1;rpl35a;rpl27;rpl35
GO:0000470	maturation of LSU-rRNA	http://amigo.geneontology.org/amigo/term/GO:0000470	15	4	0.149232	26.804	1.15808e-05	0.00125511	192299;323305;336710;563247	rpl7;rsl1d1;rpl10a;rpl35
GO:0048872	homeostasis of number of cells	http://amigo.geneontology.org/amigo/term/GO:0048872	84	7	0.835697	8.37624	1.89365e-05	0.0019983	192299;325618;334724;336687;415229;436760;554155	anxa1a;rpl11;rps14;rps27.1;rpl35a;rpl27;rpl35
GO:0022607	cellular component assembly	http://amigo.geneontology.org/amigo/term/GO:0022607	933	23	9.28221	2.47786	3.31001e-05	0.00340337	192301;195823;322258;325102;326961;327341;334626;336687;337148;393974;394027;394121;406402;406529;415229;436971;445306;550245;554155;793949;796380;798430;799355	pfn1;tmsb4x;eif3g;tmsb1;rpl5a;eif3ba;eif2s3;eif3s6ip;eif3ha;tomm20b;eif3m;naca;rpl24;eif3k;eif3ea;rpl11;rps14;rpsa;rps27.1;rps10;rps15;cct5;vdac3
GO:0000462	maturation of SSU-rRNA from tricistronic rRNA transcript (SSU-rRNA, 5.8S rRNA, LSU-rRNA)	http://amigo.geneontology.org/amigo/term/GO:0000462	21	4	0.208924	19.1457	4.84991e-05	0.00486204	336687;394027;407690;767765	rps8a;rps14;rpsa;rps16
GO:0002376	immune system process	http://amigo.geneontology.org/amigo/term/GO:0002376	585	17	5.82004	2.92094	5.78845e-05	0.00566139	30573;192299;195823;325618;334724;336503;336687;393725;394194;406489;415229;436760;436895;445027;449794;554155;798892	sumo2b;anxa1a;hsp90ab1;ifi30;h2afx1;rpl19;naca;rps7;rpl11;rps14;rps27.1;rpl35a;rpl27;rpl35;rps24;cxcl11.1;irf8
GO:0030218	erythrocyte differentiation	http://amigo.geneontology.org/amigo/term/GO:0030218	69	6	0.686466	8.74042	6.03161e-05	0.00571389	192299;325618;336687;415229;436760;554155	rpl11;rps14;rps27.1;rpl35a;rpl27;rpl35
GO:0034470	ncRNA processing	http://amigo.geneontology.org/amigo/term/GO:0034470	176	9	1.75099	5.13996	6.12712e-05	0.00571389	192299;323305;336687;336710;393725;394027;407690;563247;767765	rpl7;rsl1d1;rps8a;rpl10a;rps7;rps14;rpsa;rps16;rpl35
GO:0034101	erythrocyte homeostasis	http://amigo.geneontology.org/amigo/term/GO:0034101	70	6	0.696414	8.61556	6.54443e-05	0.00596436	192299;325618;336687;415229;436760;554155	rpl11;rps14;rps27.1;rpl35a;rpl27;rpl35
GO:0007049	cell cycle	http://amigo.geneontology.org/amigo/term/GO:0007049	506	15	5.03408	2.97969	0.000133305	0.0118421	30493;30572;30573;192299;192322;195819;334724;336710;336764;378961;393664;393725;406304;407690;497646	anxa1a;rpl7;hsp90ab1;tuba8l2;rps8a;ran;rps15a;gadd45ba;rps7;gadd45bb;rpl13;calm2b;rpl36a;rpl35;id1
GO:0030490	maturation of SSU-rRNA	http://amigo.geneontology.org/amigo/term/GO:0030490	27	4	0.268617	14.8911	0.000135844	0.0118421	336687;394027;407690;767765	rps8a;rps14;rpsa;rps16
GO:0000027	ribosomal large subunit assembly	http://amigo.geneontology.org/amigo/term/GO:0000027	11	3	0.109437	27.4131	0.000148832	0.0126982	192301;326961;415229	rpl5a;rpl24;rpl11
GO:0030099	myeloid cell differentiation	http://amigo.geneontology.org/amigo/term/GO:0030099	122	7	1.21375	5.76725	0.000205864	0.0171983	192299;325618;336687;415229;436760;436895;554155	rpl11;rps14;rps27.1;rpl35a;rpl27;rpl35;irf8
GO:0034660	ncRNA metabolic process	http://amigo.geneontology.org/amigo/term/GO:0034660	216	9	2.14894	4.18812	0.000290045	0.0237363	192299;323305;336687;336710;393725;394027;407690;563247;767765	rpl7;rsl1d1;rps8a;rpl10a;rps7;rps14;rpsa;rps16;rpl35
geneSet	description	link	size	overlap	expect	enrichmentRatio	pValue	FDR	overlapId	userId
GO:0043603	cellular amide metabolic process	http://amigo.geneontology.org/amigo/term/GO:0043603	405	55	4.59732	11.9635	0	0	30516;30722;114420;192299;192301;195819;321564;323305;325102;325618;326961;327341;334626;336568;336641;336662;336687;336713;336764;336812;337148;337240;337810;378961;393686;393710;393725;393818;393974;394027;394035;394097;394194;406402;406464;406489;406565;406686;407690;415168;415169;415229;436760;445038;445040;445306;449547;550245;554155;558312;560745;677758;767765;796380;100000341	rps2;rps3a;eif3g;rack1;eef1db;eif5a;rps8a;rpl18a;rpl5a;rpl8;rps9;eif3ba;eef1a1l1;eif2s3;eif3s6ip;eif3ha;rps15a;eif3m;rpl19;faua;rpl10a;rpl17;rps7;rpl21;rpl24;eif3k;rps23;rpl29;eif3ea;rpl11;rps27a;rps14;rpl23;rps13;rpsa;rpl13;rpl18;rps27.1;rps4x;rps11;rps16;rps15;rpl35a;rps17;eif2s1b;rpl34;rplp2l;rpl30;rpl31;rpl27;rpl36a;rps26;rpl39;rpl35;rps24
GO:0022613	ribonucleoprotein complex biogenesis	http://amigo.geneontology.org/amigo/term/GO:0022613	204	24	2.31569	10.3641	0	0	192299;192301;323305;325102;326961;327341;334626;336687;336710;337148;393725;393974;394027;394121;406402;407690;415229;436760;445306;550245;554155;563247;767765;796380	rpl7;eif3g;rsl1d1;rps8a;rpl5a;eif3ba;eif2s3;eif3s6ip;eif3ha;eif3m;rpl10a;rps7;rpl24;eif3k;eif3ea;rpl11;rps14;rpsa;rps27.1;rps10;rps16;rps15;rpl35a;rpl35
GO:0071826	ribonucleoprotein complex subunit organization	http://amigo.geneontology.org/amigo/term/GO:0071826	111	16	1.26001	12.6983	7.03881e-14	6.66341e-12	192301;325102;326961;327341;334626;336687;337148;393974;394027;394121;406402;415229;445306;550245;554155;796380	eif3g;rpl5a;eif3ba;eif2s3;eif3s6ip;eif3ha;eif3m;rpl24;eif3k;eif3ea;rpl11;rps14;rpsa;rps27.1;rps10;rps15
GO:0034622	cellular protein-containing complex assembly	http://amigo.geneontology.org/amigo/term/GO:0034622	406	20	4.60867	4.33964	1.93694e-08	1.37523e-06	192301;325102;326961;327341;334626;336687;337148;393974;394027;394121;406402;415229;436971;445306;550245;554155;793949;796380;798430;799355	pfn1;tmsb4x;eif3g;tmsb1;rpl5a;eif3ba;eif2s3;eif3s6ip;eif3ha;tomm20b;eif3m;rpl24;eif3k;eif3ea;rpl11;rps14;rpsa;rps27.1;rps10;rps15
GO:0009792	embryo development ending in birth or egg hatching	http://amigo.geneontology.org/amigo/term/GO:0009792	320	17	3.63245	4.68003	8.90659e-08	5.05894e-06	192299;192301;195819;326961;336687;336764;337148;337240;393725;406304;407690;415229;436760;445027;449547;497646;558312	sumo2b;rps3a;rps8a;rpl5a;rps15a;gadd45ba;rps7;rpl24;rpl11;rps14;gadd45bb;rps4x;rps15;rpl35a;rplp2l;rpl36a;rpl35
GO:0002520	immune system development	http://amigo.geneontology.org/amigo/term/GO:0002520	292	13	3.31461	3.92203	2.32339e-05	0.00109974	192299;195823;325618;334724;336687;393725;394194;406489;415229;436760;436895;445027;554155	sumo2b;anxa1a;rpl19;naca;rps7;rpl11;rps14;rps27.1;rpl35a;rpl27;rpl35;rps24;irf8
GO:0051726	regulation of cell cycle	http://amigo.geneontology.org/amigo/term/GO:0051726	257	12	2.91731	4.11337	3.08379e-05	0.00125114	30493;30573;192299;195819;334724;336710;336764;378961;393725;406304;407690;497646	anxa1a;rpl7;hsp90ab1;rps8a;rps15a;gadd45ba;rps7;gadd45bb;rpl13;rpl36a;rpl35;id1
GO:0034660	ncRNA metabolic process	http://amigo.geneontology.org/amigo/term/GO:0034660	216	9	2.45191	3.67061	0.000738309	0.02621	192299;323305;336687;336710;393725;394027;407690;563247;767765	rpl7;rsl1d1;rps8a;rpl10a;rps7;rps14;rpsa;rps16;rpl35
geneSet	description	link	size	overlap	expect	enrichmentRatio	pValue	FDR	overlapId	userId
dre03010	Ribosome	http://www.kegg.jp/kegg-bin/show_pathway?dre03010+100000341+114420+192297+192299+192301+195819+323305+325618+326961+327089+336568+336641+336662+336687+336702+336710+336713+336764+336812+337010+337148+337240+337810+378961+393686+393710+393723+393725+393788+393818+394027+394035+394036+394097+394121+394194+406489+406565+406686+407690+415168+415169+415229+436760+445038+445040+449547+554155+558312+560…	134	53	2.216	23.917	0	0	100000341;114420;192297;192299;192301;195819;323305;325618;326961;327089;336568;336641;336662;336687;336702;336710;336713;336764;336812;337010;337148;337240;337810;378961;393686;393710;393723;393725;393788;393818;394027;394035;394036;394097;394121;394194;406489;406565;406686;407690;415168;415169;415229;436760;445038;445040;449547;554155;558312;560828;58101;677758;767765	rps2;rpl7;rps3a;rps8a;rpl18a;rpl9;rpl5a;rpl8;rps9;rps15a;rpl12;rpl19;faua;rpl10a;rpl17;rps7;rpl21;rpl24;rps23;rpl29;rpl11;rps19;rps27a;rps14;rpl23;rps13;rpsa;rpl13;rpl13a;rpl18;rps27.1;rps10;rpl7a;rps4x;rps5;rps11;rps16;rps15;rpl35a;rps17;rpl34;rplp2l;rps25;rpl30;rpl31;rpl28;rpl27;rpl36a;rps26;rpl39;rpl35;rplp0;rps24
dre03013	RNA transport	http://www.kegg.jp/kegg-bin/show_pathway?dre03013+30516+30572+321564+325102+327341+393974+399484+445027+445306+796380+799566	158	11	2.61289	4.20989	5.17485e-05	0.00419163	30516;30572;321564;325102;327341;393974;399484;445027;445306;796380;799566	sumo2b;eif3g;eif4a1b;eif3ba;ran;eef1a1l1;eif2s3;eif3ha;eif3ea;eif2s1b;eif4ebp1
Dendrogram 6
geneSet	description	link	size	overlap	expect	enrichmentRatio	pValue	FDR	overlapId	userId
GO:0006091	generation of precursor metabolites and energy	http://amigo.geneontology.org/amigo/term/GO:0006091	156	54	15.5087	3.48192	0	0	317746;322339;325724;326962;327165;334420;335751;335817;336118;336425;369193;393248;393700;393720;393731;393781;393829;393884;393926;393938;394155;399662;406294;406299;406359;406367;406413;406717;415247;436677;436768;445042;445129;445283;445291;445500;449777;494577;503714;541328;553384;553755;554101;554154;556538;557348;558925;562149;564379;567798;573689;100126232;100332034;100333064	pgam1b;cox10;sh3bgrl3;glrx2;ugp2b;sdhc;uqcrfs1;cyc1;idh3a;sdha;cs;aldoaa;pkma;gapdhs;fh;fdx1;agla;etfa;glrx5;uqcc3;ciapin1;ndufaf1;cox7a2l;ndufs8a;sucla2;ndufs4;idh3b;aldocb;glrx3;uqcc2;ndufa8;sdhdb;gys1;slc25a55a;suclg2;sdhb;mdh1aa;ndufb3;uqcrb;atp5fa1;cox8a;ndufa7;ndufb8;ndufb6;ndufv1;ndufv2;ndufa5;cox7c;cox6c;cox5ab;ndufa12;uqcrq;cox5aa;uqcr10
GO:0009057	macromolecule catabolic process	http://amigo.geneontology.org/amigo/term/GO:0009057	403	92	40.064	2.29632	4.88498e-15	6.93667e-13	30647;30648;30665;30666;64279;83917;171585;192325;321585;321898;321947;322073;322309;322325;323529;323883;324404;324654;325469;326687;326884;327197;327239;327327;335810;393121;393445;393536;393544;393567;393669;393716;393722;393731;393747;393922;393941;394008;403011;403015;406417;406445;406508;406589;406618;406788;415177;415202;415221;436724;436816;436820;436882;436979;445033;445080;445285;445413…	ccdc22;dcp2;usp36;aup1;anapc11;fbxo45;fbxo9;shrprbck1r;rnf14;selenos;ptpn23a;wwp2;usp5;zc3h14;snd1;hnrnpa0a;rbm8a;ubb;uchl3;psmd8;psma1;psma8;ufd1l;ncbp2;psmc2;arih2;usp9;patl1;si:ch211-284e13.9;ubxn1;usp33;psma4;psma6l;agla;cnot1;psmb2;psma6a;psma2;psme2;rad23b;tmub1;cul1a;rmnd5b;rnf7;psme1;lsm4;xrn1;vps36;lypla2;psmf1;spsb4b;skp1;ngly1;psmc3;psmd4b;uqcc2;rnf111;chfr;ube3c;psmd4a;psmc4;psmc6;rnf…
GO:0017144	drug metabolic process	http://amigo.geneontology.org/amigo/term/GO:0017144	225	54	22.3683	2.41413	4.0891e-10	3.87102e-08	317746;322339;323329;326962;326977;327165;335191;335751;335817;336118;336425;336957;369193;393526;393675;393700;393720;393731;393781;393829;393884;393926;393938;399662;406299;406301;406359;406367;406413;406599;415247;436726;436768;436914;445042;445129;445291;445500;447941;503714;541344;541435;553755;554101;554135;554154;558925;559134;562149;564379;570584;792097;798291;100333064	amd1;apip;pgam1b;mtap;sdhc;uqcrfs1;cyc1;idh3a;sdha;cs;atp5po;aldoaa;pkma;gapdhs;fh;zgc:92335;uqcc3;ndufaf1;cox7a2l;ndufs8a;acss2;sucla2;atp5f1c;idh3b;aldocb;parga;uqcc2;mat2aa;ndufa8;sdhdb;prdx1;suclg2;sdhb;acss1;mdh1aa;moxd1;uqcrb;atp5fa1;ndufa7;ndufb8;ndufb6;ndufv1;ndufv2;atp5l;atp5f1e;cox7c;atp5pf;cox5ab;atp5f1b;atp5pd;uqcrq;atp5mc1;cox5aa;uqcr10
GO:1901565	organonitrogen compound catabolic process	http://amigo.geneontology.org/amigo/term/GO:1901565	424	83	42.1518	1.96908	5.7417e-10	4.0766e-08	30647;30648;30665;30666;64279;83917;171585;321585;321898;321947;322073;322309;322325;323883;324654;325469;326687;326884;327197;327239;327327;335810;393445;393536;393544;393567;393716;393722;393731;393747;393922;393941;403011;403015;406417;406445;406508;406589;406618;406688;415177;415202;415221;436724;436816;436820;436882;436979;445033;445080;445285;445413;449846;503534;550134;550287;550326;550499…	ccdc22;usp36;aup1;anapc11;fbxo45;fbxo9;shrprbck1r;rnf14;selenos;ptpn23a;wwp2;usp5;tet2;got2a;ubb;uchl3;psmd8;psma1;psma8;ufd1l;psmc2;arih2;usp9;si:ch211-284e13.9;ubxn1;usp33;psma4;psma6l;psmb2;psma6a;psma2;psme2;rad23b;tmub1;cul1a;rmnd5b;rnf7;psme1;vps36;lypla2;psmf1;spsb4b;skp1;ngly1;psmc3;psmd4b;uqcc2;rnf111;chfr;ube3c;psmd4a;psmc4;psmc6;rnf121;psma5;psmc5;psmb10;psmb4;n4bp1;psmd13;usp18;sirt2;…
GO:0072521	purine-containing compound metabolic process	http://amigo.geneontology.org/amigo/term/GO:0072521	192	46	19.0876	2.40994	8.88754e-09	5.04812e-07	80939;317746;326962;326977;327165;335191;335751;335817;336118;336425;336957;369193;393526;393675;393700;393720;393731;393781;393829;393884;406301;406359;406367;406369;406413;406599;436768;436914;445042;445129;445291;445500;447941;503714;541435;553755;554101;554135;554154;558925;559134;564379;678545;792097;798291;100333064	amd1;papss2b;apip;pgam1b;mtap;sdhc;uqcrfs1;cyc1;sdha;atp5po;aldoaa;pkma;gapdhs;uqcc3;ndufaf1;cox7a2l;ndufs8a;acss2;atp5f1c;aldocb;parga;gmpr2;uqcc2;ndufa8;sdhdb;suclg2;acss1;prpsap2;uqcrb;atp5fa1;ndufa7;ndufb8;ndufb6;ndufv1;ndufv2;atp5l;atp5f1e;cox7c;atp5pf;cox5ab;atp5f1b;atp5pd;uqcrq;atp5mc1;cox5aa;uqcr10
GO:0055086	nucleobase-containing small molecule metabolic process	http://amigo.geneontology.org/amigo/term/GO:0055086	283	58	28.1343	2.06154	4.88413e-08	2.31182e-06	80939;317746;321720;322513;326962;326977;327165;334420;335191;335751;335817;336118;336425;336957;368229;369193;393461;393526;393675;393700;393720;393731;393781;393829;393884;399662;406301;406359;406367;406369;406413;406554;406599;406762;436768;436914;437016;445042;445129;445291;445500;447941;503714;541435;553755;554101;554135;554154;558925;559134;564379;567414;570579;678545;792097;797867;798291;1…	amd1;papss2b;apip;pgam1b;agpat9l;ugp2b;mtap;sdhc;uqcrfs1;cyc1;sdha;atp5po;aldoaa;pkma;gapdhs;nt5c3a;lclat1;gmds;g6pd;uqcc3;ndufaf1;cox7a2l;ndufs8a;acss2;atp5f1c;aldocb;pmm2;parga;gmpr2;uqcc2;tk2;ndufa8;sdhdb;naxd;uap1;suclg2;acss1;mdh1aa;prpsap2;uqcrb;atp5fa1;ndufa7;ndufb8;ndufb6;ndufv1;ndufv2;pgd;atp5l;atp5f1e;cox7c;atp5pf;cox5ab;atp5f1b;atp5pd;uqcrq;atp5mc1;cox5aa;uqcr10
GO:0034622	cellular protein-containing complex assembly	http://amigo.geneontology.org/amigo/term/GO:0034622	406	74	40.3623	1.83339	1.20384e-07	4.88416e-06	192330;321585;321947;323579;326884;327068;327069;327082;335083;335474;335751;336498;336504;337214;368864;373117;386637;386920;393198;393485;393497;393669;393731;393922;393941;393951;394018;394029;394046;394092;406263;406307;406318;406413;406495;406652;406820;415174;415202;415204;436709;436821;436987;445030;445285;447922;448949;503600;503608;503714;550287;553660;554154;558925;564633;565799;567041;…	eif3d;taf12;vma21;psmg2;eif3i;actr2a;cenpx;eif3hb;capzb;si:ch211-200p22.4;tspy;cog4;pstpip1a;hist2h2l;srp19;arpc1b;cltca;arpc3;tbca;psmc2;clta;mrps7;patl1;cops8;ccdc115;rbm22;prpf39;taf7;nudt21;pfdn6;cnot1;arpc5a;mia3;arpc2;wipf1b;uqcc3;ndufaf1;mcts1;lsm4;cox7a2l;ndufs8a;med6;wasa;gtf2a2;celf2;psmc3;psmd4b;uqcc2;tmem199;snrpc;ddx6;cpsf6;psmd4a;psmc4;psmc6;snap23.2;psmc5;pomp;psmd13;cltcb;psmg1;ps…
GO:0070647	protein modification by small protein conjugation or removal	http://amigo.geneontology.org/amigo/term/GO:0070647	404	73	40.1635	1.81757	2.10616e-07	7.47688e-06	114445;322073;322325;322756;322927;323226;323883;323904;325469;326067;327197;327200;327239;327327;352910;373107;378716;378965;393198;393223;393276;393445;393567;393698;393747;402838;404615;406335;406398;406417;406438;406442;406508;406606;406618;406622;406776;415177;436684;436700;445080;445146;445249;445256;445396;449846;450014;503534;550134;550576;553758;554104;555349;555877;556823;557981;563470;…	pcnp;anapc16;ufm1;amfra;usp36;rnf20;anapc11;mindy1;fbxo45;fbxo9;shrprbck1r;rnf14;ube2f;mib1;wwp2;usp5;aktip;fzr1a;ubb;uchl3;sumo3a;cops5;arih2;usp9;cops8;si:ch211-284e13.9;fem1c;rnf115;sumo1;asb12a;waca;ubxn1;usp33;zyg11;march5l;asb8;otub1a;dcun1d5;btr31;rnf169;cul1a;rmnd5b;stambpa;rnf7;cish;birc2;pef1;spsb4b;ube2ia;rbbp6;ufc1;rnf111;otud5b;chfr;uba3;uba7;ube3c;eny2;rnf121;n4bp1;fbxo11a;rnf181;us…
GO:0006352	DNA-templated transcription, initiation	http://amigo.geneontology.org/amigo/term/GO:0006352	43	16	4.27482	3.74284	1.58199e-06	4.99204e-05	321485;321585;321947;326884;386637;393941;415174;415217;436821;445285;449992;553561;555452;556710;798997;100002261	taf12;taf1;gtf2f2a;psmc2;taf7;polr2i;sub1a;med6;gtf2a2;psmc3;psmc4;psmc6;psmc5;taf9;taf10;taf11
GO:0016071	mRNA metabolic process	http://amigo.geneontology.org/amigo/term/GO:0016071	248	48	24.6548	1.94688	3.96138e-06	0.000112503	192325;192330;286774;321860;323529;324121;324476;327069;368864;373117;386806;393102;393121;393669;393701;393951;394008;394018;394092;402896;405835;406277;406288;406495;406788;406824;415167;415211;436751;436946;436976;445043;445383;445396;447922;448949;449992;450021;492495;503767;556024;562846;568678;573096;798982;100009659;100126015;100145909	slu7;dcp2;zc3h14;hnrnpa0a;snrpb2;rbm8a;fip1l1b;srsf9;ncbp2;patl1;rbm4.3;rbm22;prpf39;nudt21;snrpa;cnot1;rbmx;polr2i;ssu72;aurkaip1;cstf2;zmat2;lsm4;xrn1;hnrnpl2;srsf1a;celf2;rbbp6;bud31;sf3b5;snrpc;cpsf6;mov10b.1;srsf3b;tent4b;cmtr1;cnot8;puf60b;phf5a;syf2;ptbp3;sart1;sf3a2;snrpg;prpf8;snrnp27;sf3b3;lsm6
GO:0016192	vesicle-mediated transport	http://amigo.geneontology.org/amigo/term/GO:0016192	476	74	47.3213	1.56378	5.06584e-05	0.00130791	30187;114452;114464;192340;266982;321051;322338;323579;324569;327082;327197;334219;334632;335810;337737;352910;368215;368728;373104;373129;378716;393103;393124;393236;393265;393378;393754;393846;393881;393902;394109;403014;405848;405851;406318;406508;406684;415141;436755;436812;436911;437015;445112;445176;445190;445249;450008;492487;494092;494101;503600;553536;554177;554200;556111;556597;561659;5…	sar1b;vps29;ap5s1;vps26b;jagn1b;heatr5a;zfyve27;csnk1g1;blzf1;becn1;mib1;tmem115;cog4;yipf5;kdelr2a;spast;necap2;sybl1;aktip;nsfb;tor1;rab11fip4b;ergic2;cltca;ap2m1a;rab5aa;trappc5;sh3gl1a;clta;preb;ap2b1;exoc1;trappc1;usp33;scarb2a;rab11a;bloc1s1;mia3;uso1;wipf1b;trappc2l;gosr2;sec22ba;stx12;reps1;chmp7;vps26a;tmed7;fes;wasa;vps37c;vps36;rab7a;ccz1;pef1;tmed9;anxa11a;ap3s2;bloc1s2;ap1m1;trappc6b…
GO:0019637	organophosphate metabolic process	http://amigo.geneontology.org/amigo/term/GO:0019637	422	67	41.9529	1.59703	6.02223e-05	0.00142526	80939;317746;321720;322041;325690;325712;326962;326977;327165;335191;335751;335817;336118;336425;336957;369193;373124;393365;393675;393700;393720;393731;393781;393829;393884;399662;402926;402942;406301;406311;406359;406367;406369;406413;406554;406599;406762;406835;436662;436768;436914;437016;445042;445129;445202;445291;445500;447840;503714;541435;553755;554101;554135;554154;558925;559134;564379;5…	papss2b;pgam1b;dpm1;pip4k2ca;mtmr8;serinc5;agpat9l;sdhc;uqcrfs1;cyc1;sdha;atp5po;aldoaa;ndufab1b;pkma;gapdhs;fam126a;nt5c3a;lclat1;pik3r3a;gpd2;ip6k2a;g6pd;uqcc3;ndufaf1;inpp4aa;pigf;cox7a2l;ndufs8a;acss2;atp5f1c;cish;aldocb;parga;gmpr2;uqcc2;tk2;ndufa8;sdhdb;ip6k2b;pip5k1bb;pik3cb;naxd;suclg2;acss1;mdh1aa;serinc1;prpsap2;uqcrb;atp5fa1;ndufa7;ndufb8;ndufb6;ndufv1;ndufv2;pgd;atp5l;atp5f1e;cox7c;at…
GO:0007005	mitochondrion organization	http://amigo.geneontology.org/amigo/term/GO:0007005	138	29	13.7192	2.11383	7.09579e-05	0.00155016	322549;325724;326067;326974;335751;393354;393405;393497;393508;393731;403036;406413;407695;436930;436984;494180;503714;553660;554154;558738;558925;641319;751765;767645;792181;797988;100332034;100333064;100334510	zgc:153993;tmem11;uqcrc2b;gabarapl2;fundc1;march5l;etfa;mff;uqcc3;ndufaf1;uqcrc2a;cox7a2l;ndufs8a;atg13;micos13;fundc2;cisd2;fis1;uqcc2;atg5;gabarapa;pmaip1;ndufb3;uqcrb;ndufa11;pet100;ndufs5;uqcr10;apooa
GO:1901135	carbohydrate derivative metabolic process	http://amigo.geneontology.org/amigo/term/GO:1901135	490	73	48.7131	1.49857	0.000224597	0.0045561	80939;317746;322513;324487;324501;324944;325712;326962;326977;327165;327197;334420;335191;335751;335817;335863;336118;336425;336526;336957;368229;369193;393461;393526;393675;393700;393720;393731;393742;393781;393829;393884;402942;406301;406359;406367;406369;406408;406413;406599;406762;436768;436914;436979;445042;445129;445202;445291;445500;447941;503714;541435;553627;553668;553755;554101;554135;5…	amd1;magt1;papss2b;apip;pgam1b;dpm1;mgat5;mgat1b;ugp2b;mtap;itm2cb;sdhc;dad1;tmem258;uqcrfs1;cyc1;sdha;atp5po;aldoaa;ndufab1b;pkma;gapdhs;gpd2;galnt7;gmds;g6pd;uqcc3;ndufaf1;oga;ddost;pigf;cox7a2l;ndufs8a;acss2;atp5f1c;aldocb;b3gnt5a;pmm2;parga;gmpr2;ngly1;uqcc2;man2a1;ndufa8;sdhdb;uap1;vcp;naga;myorg;tmem165;suclg2;acss1;lygl1;prpsap2;uqcrb;atp5fa1;ndufa7;ndufb8;ndufb6;ndufv1;ndufv2;pgd;atp5l;at…
GO:0006457	protein folding	http://amigo.geneontology.org/amigo/term/GO:0006457	75	18	7.45609	2.41413	0.000301902	0.00571601	30248;321315;323005;325317;335335;393485;393555;394029;394037;406673;406826;407073;415155;503766;554998;565062;568182;791222	calr;calr3b;pdia4;cct8;cct4;emc2;calr3a;emc3;pfdn5;tor1;p4hb;ppid;fkbp1aa;tbca;pfdn6;mesd;pfdn1;nktr
GO:0090662	ATP hydrolysis coupled transmembrane transport	http://amigo.geneontology.org/amigo/term/GO:0090662	20	8	1.98829	4.02356	0.000390891	0.00693832	195824;286779;321724;322811;368907;406301;436799;553767	atp6v1c1a;atpv0e2;atp6v1f;atp6v1h;atp6v0d1;atp6ap1b;atp6v0b;atp5mc1
GO:0070727	cellular macromolecule localization	http://amigo.geneontology.org/amigo/term/GO:0070727	483	70	48.0172	1.45781	0.000673074	0.0107726	30187;114452;195824;266796;321051;321232;322338;322549;323579;324569;327082;327197;333980;334219;334632;335810;337190;337737;352910;368229;373104;373129;393124;393405;393508;393583;393846;393881;393902;402926;405848;405884;406318;406635;406652;406684;415141;436700;436772;436812;436930;445055;492487;492497;503600;541342;550239;550378;553597;554177;554200;558883;559632;561659;567182;570700;573437;6…	sar1b;tbc1d10c;spcs3;vps29;vps26b;get4;si:dkey-17o15.2;zfyve27;blzf1;becn1;selenos;mib1;spcs2;kdelr2a;syne3;sec61b;srp19;nsfb;hikeshi;golga7;uqcrc2b;cltca;ap2m1a;ssr3;spcs1;rab5aa;xpo6;fam126a;clta;ap2b1;exoc1;rab11a;uso1;mff;kpnb1;gosr2;sgsm3;stx12;uqcrc2a;rabgap1;tprb;vps26a;mesd;bbip1;rab42b;tmed7;atg13;vps36;rab7a;pmm2;tmed9;tomm22;lamtor3;tbc1d5;ap3s2;stam2;ap1m1;sec61a1l;snx6;copg2;eny2;rnf…
GO:0016050	vesicle organization	http://amigo.geneontology.org/amigo/term/GO:0016050	67	16	6.66077	2.40212	0.000682771	0.0107726	114464;195824;322811;324569;373104;378716;393124;393236;393902;405851;415141;436911;445249;554177;556597;641321	sar1b;spast;sybl1;aktip;preb;bloc1s1;uso1;gosr2;sec22ba;stx12;rab7a;pef1;snap23.2;rab14;atp6v0d1;atp6ap1b
GO:0030162	regulation of proteolysis	http://amigo.geneontology.org/amigo/term/GO:0030162	154	28	15.3098	1.82889	0.00113024	0.0168942	30221;30647;30648;58131;114401;321947;322073;322309;326884;327197;327327;335119;373107;393153;393941;406417;415177;445285;494155;556259;563084;566600;606559;751765;768128;792225;100333504;101886968	serpinb1l3;serpinb1l1;ccdc22;rnf14;cst14b.2;apaf1;cst14a.2;psmc2;arih2;si:ch211-284e13.9;cst14b.1;ubxn1;psme2;psme1;bcl2l1;birc2;psmc3;psen1;psmc4;rnf121;psmc5;n4bp1;sirt2;vcp;cast;serpine2;pmaip1;lamtor5
GO:0009894	regulation of catabolic process	http://amigo.geneontology.org/amigo/term/GO:0009894	143	25	14.2163	1.75855	0.00352068	0.0499937	30647;30648;321947;322073;322309;323529;325724;326884;327197;327327;393354;393365;393544;393731;393941;406417;415177;445285;448949;555795;556259;562846;564527;566600;606559	ccdc22;mtmr8;rnf14;wwp2;si:ch211-260e23.9;zc3h14;hnrnpa0a;psmc2;arih2;si:ch211-284e13.9;ubxn1;cnot1;etfa;psme2;psme1;cisd2;psmc3;uqcc2;psmc4;rnf121;psmc5;n4bp1;sirt2;psmd3;vcp
geneSet	description	link	size	overlap	expect	enrichmentRatio	pValue	FDR	overlapId	userId
dre00190	Oxidative phosphorylation	http://www.kegg.jp/kegg-bin/show_pathway?dre00190+100000992+100332034+100333064+100537318+195824+286779+321724+321951+322549+322811+324307+325712+326962+326977+335191+335709+335751+335774+336118+336957+359839+368907+393478+393497+393675+393700+393703+393720+393764+393781+393793+393821+393829+393884+393943+394110+402883+406301+406306+406359+406413+406599+406726+415243+436768+436799+436930+445042+4…	140	81	17.5768	4.60835	0	0	100000992;100332034;100333064;100537318;195824;286779;321724;321951;322549;322811;324307;325712;326962;326977;335191;335709;335751;335774;336118;336957;359839;368907;393478;393497;393675;393700;393703;393720;393764;393781;393793;393821;393829;393884;393943;394110;402883;406301;406306;406359;406413;406599;406726;415243;436768;436799;436930;445042;445122;445129;445291;445500;447913;449787;494577;54…	ndufb7;cox10;atp6v0a1a;ndufb10;ndufs7;ndufb4;sdhc;ndufb2;uqcrfs1;cyc1;sdha;atp6v1c1a;ndufab1a;uqcrc1;atp5po;uqcrc2b;ndufab1b;atp5pb;uqcrc2a;cox7a2l;ndufs3;ndufs8a;atp5f1c;ndufs4;ndufa2;ndufs2;ndufv3;ndufa8;sdhdb;atpv0e2;atp6v1f;sdhb;atp6v1h;atp6v0d1;atp6v1ba;atp6ap1b;ndufa3;atp6v0b;ndufb3;atp6v1aa;cox7b;uqcrb;atp5fa1;cox8a;cox6a1;ndufc2;ndufs6;ndufb5;ndufa7;si:ch211-235e9.6;cox6b2;ndufb8;ndufa9a;…
dre03050	Proteasome	http://www.kegg.jp/kegg-bin/show_pathway?dre03050+171585+30388+30647+30648+30665+30666+321585+321898+321947+322269+326687+326884+336786+393261+393544+393922+393941+403011+403015+406445+415202+415221+436816+436820+436862+436882+445030+445033+445285+445413+550287+550499+554153+554967+564370+573095+64279+64280+796450+799058+83917	56	41	7.03071	5.83156	0	0	171585;30388;30647;30648;30665;30666;321585;321898;321947;322269;326687;326884;336786;393261;393544;393922;393941;403011;403015;406445;415202;415221;436816;436820;436862;436882;445030;445033;445285;445413;550287;550499;554153;554967;564370;573095;64279;64280;796450;799058;83917	psmd8;psma1;psma8;psmc2;psma4;psma6l;psmb2;psmd6;psma6a;psmb6;psma2;psme2;psme1;adrm1;psmf1;sem1;psmc3;psmd4b;psmd4a;psmc4;psma6b;psmc6;psma5;psmc1a;psmc5;psmb10;psmb4;pomp;psmd14;psmd1;psmd13;psmd12;psmb3;psma3;psmb1;psmd3;psmb9a;psmb8a;psmb13a;psmb12;si:rp71-45k5.4
dre00020	Citrate cycle (TCA cycle)	http://www.kegg.jp/kegg-bin/show_pathway?dre00020+100006589+317746+322339+322670+324201+368262+386951+393884+393926+393938+399479+399662+406299+406428+406702+415247+445129+445500+562149	34	19	4.26865	4.45106	1.78394e-09	9.63327e-08	100006589;317746;322339;322670;324201;368262;386951;393884;393926;393938;399479;399662;406299;406428;406702;415247;445129;445500;562149	dldh;idh1;dlst;sdhc;aco2;dlat;idh3a;sdha;cs;idh2;fh;sucla2;idh3b;pdhb;pdha1a;sdhdb;suclg2;sdhb;mdh1aa
dre01200	Carbon metabolism	http://www.kegg.jp/kegg-bin/show_pathway?dre01200+100006589+246094+317737+317746+322339+322670+324201+327165+334116+335817+335974+336425+368262+368912+369193+373092+378713+386951+393884+393926+393938+399479+399662+406283+406299+406428+406688+406702+406762+415247+436914+445129+445233+445500+541435+562149+570579+793834	131	38	16.4468	2.31047	3.18982e-07	1.29188e-05	100006589;246094;317737;317746;322339;322670;324201;327165;334116;335817;335974;336425;368262;368912;369193;373092;378713;386951;393884;393926;393938;399479;399662;406283;406299;406428;406688;406702;406762;415247;436914;445129;445233;445500;541435;562149;570579;793834	gpia;acadm;pgam1b;echs1;dldh;idh1;dlst;got2a;sdhc;aco2;dlat;idh3a;sdha;cs;aldoaa;pkma;me2;idh2;fh;hadhab;g6pd;glud1b;acss2;sucla2;idh3b;pdhb;aldocb;eno1a;got2b;pdha1a;sdhdb;suclg2;sdhb;acss1;mdh1aa;glud1a;pgd;tktb
dre04141	Protein processing in endoplasmic reticulum	http://www.kegg.jp/kegg-bin/show_pathway?dre04141+100001092+170784+266796+30248+321315+322160+323883+323918+325317+325561+327133+327197+334337+337190+368331+378851+393371+393536+393716+394164+406408+406442+406673+406753+436724+436772+436911+449846+492805+503703+550464+553288+553627+554093+554177+554998+558071+559776+565499+566527+573376+735249+767645+767700+791986+798071	180	46	22.5987	2.03551	1.08644e-06	3.52006e-05	100001092;170784;266796;30248;321315;322160;323883;323918;325317;325561;327133;327197;334337;337190;368331;378851;393371;393536;393716;394164;406408;406442;406673;406753;436724;436772;436911;449846;492805;503703;550464;553288;553627;554093;554177;554998;558071;559776;565499;566527;573376;735249;767645;767700;791986;798071	calr;calr3b;sar1b;pdia4;amfra;calr3a;erlec1;selenos;sec61b;zgc:153993;stt3b;derl1;hyou1;pdia6;dad1;pdia3;p4hb;zgc:175088;hspa8;ssr3;ufd1l;ube4b;atf6;preb;ubqln4;uggt1;ero1b;rad23b;edem1;ube2g2;cul1a;ddost;rpn1;dnajc5gb;eif2ak2;derl2;pkz;skp1;ngly1;sec61a1l;nsfl1c;sec13;vcp;sec61g;herpud1;rbx1
dre03040	Spliceosome	http://www.kegg.jp/kegg-bin/show_pathway?dre03040+100145909+192325+192328+192330+286774+321860+321931+324121+324476+393388+393669+393951+394018+402896+402972+405835+406264+406288+406495+406824+415167+436751+436946+436976+445043+445383+447922+449780+492495+494133+503767+503932+573376+606595	134	34	16.8235	2.02098	3.27322e-05	0.000880465	100145909;192325;192328;192330;286774;321860;321931;324121;324476;393388;393669;393951;394018;402896;402972;405835;406264;406288;406495;406824;415167;436751;436946;436976;445043;445383;447922;449780;492495;494133;503767;503932;573376;606595	slu7;hnrpkl;ddx42;dhx8;snrpb2;rbm8a;hspa8;dhx15;srsf9;ncbp2;srsf6b;rbm22;snrpa;rbmx;srsf7a;zmat2;lsm4;srsf1a;tra2a;bud31;sf3b5;txnl4a;snrpc;srsf3b;u2af1;phf5a;syf2;sart1;sf3a2;snrpg;prpf8;snrnp27;sf3b3;lsm6
dre01100	Metabolic pathways	http://www.kegg.jp/kegg-bin/show_pathway?dre01100+100000992+100001532+100002263+100004977+100006589+100037312+100037338+100037356+100149268+100332034+100333064+100537318+195824+246094+266987+286779+30430+30497+317737+317746+321720+321724+321951+322339+322513+322549+322670+322732+322811+323329+323613+323918+324201+324307+325561+325712+326962+326977+327165+327346+327462+333974+334116+334197+334420+…	1363	215	171.123	1.25641	3.80448e-05	0.000880465	100000992;100001532;100002263;100004977;100006589;100037312;100037338;100037356;100149268;100332034;100333064;100537318;195824;246094;266987;286779;30430;30497;317737;317746;321720;321724;321951;322339;322513;322549;322670;322732;322811;323329;323613;323918;324201;324307;325561;325712;326962;326977;327165;327346;327462;333974;334116;334197;334420;334669;335191;335709;335774;335817;335974;336118;3…	amd1;acaa2;gpia;ndufb7;acadm;papss2b;apip;pgam1b;dpm1;mgat5;pip4k2ca;polr2j;cox10;mtmr8;b3gnt5b;acadl;acsl3b;aldh7a1;atp6v0a1a;mtmr6;plcb3;scp2a;agpat9l;hyal6;mgat1b;ugp2b;mtap;echs1;cds2;dldh;bpnt1;nadkb;idh1;pold1;synj1;lpin2;bdh1;pgm1;sms;gyg1a;stt3b;dlst;ndufb10;ndufs7;ndufb4;got2a;glulb;sdhc;dad1;ndufb2;uqcrfs1;aco2;cyc1;dlat;idh3a;sdha;cs;atp6v1c1a;ndufab1a;hadhb;uqcrc1;atp5po;uqcrc2b;aldoa…
dre03022	Basal transcription factors	http://www.kegg.jp/kegg-bin/show_pathway?dre03022+100002261+321485+323974+324153+324823+325832+334854+386637+415217+436821+555452+556710+751713+798997	40	14	5.02194	2.78777	0.000213216	0.00431763	100002261;321485;323974;324153;324823;325832;334854;386637;415217;436821;555452;556710;751713;798997	taf12;gtf2f1;taf1;gtf2f2a;gtf2a1;gtf2b;taf13;taf7;gtf2e2;gtf2a2;gtf2h5;taf9;taf10;taf11
dre05168	Herpes simplex infection	http://www.kegg.jp/kegg-bin/show_pathway?dre05168+100001092+100003223+100145909+100151347+100333043+30428+30768+323099+323883+324153+335916+368481+368771+393650+393716+394198+402972+403013+404615+405770+405835+406264+406288+406463+407980+415254+494133+503703+553758+553788+554167+556710+559273+565206+565612+565759+567111+58107+768248	185	39	23.2265	1.67912	0.000638026	0.0114845	100001092;100003223;100145909;100151347;100333043;30428;30768;323099;323883;324153;335916;368481;368771;393650;393716;394198;402972;403013;404615;405770;405835;406264;406288;406463;407980;415254;494133;503703;553758;553788;554167;556710;559273;565206;565612;565759;567111;58107;768248	hnrpkl;tap1;map3k7;zgc:86598;fosab;hmgn6;srsf9;crebbpb;hcfc1b;srsf6b;taf13;irf7;tap2a;stat1a;ppp1caa;irf9;srsf7a;ep300b;cul1a;eif2ak2;srsf1a;csnk2b;pkz;ifih1;skp1;ep300a;stat1b;srsf3b;fas;ppp1cb;usp7;jun;taf10;tnfb;per3;il1b;nfkbiab;med8;nfkbiaa
dre04621	NOD-like receptor signaling pathway	http://www.kegg.jp/kegg-bin/show_pathway?dre04621+100001532+100006041+100150844+114401+30768+322126+323099+326974+334571+335916+368481+373107+393551+393650+403013+403036+405770+406463+406659+431715+436615+445223+492489+494180+550552+553788+557810+569903+570965+571331+57923+65237+767660+796425	156	34	19.5856	1.73597	0.000753305	0.0117904	100001532;100006041;100150844;114401;30768;322126;323099;326974;334571;335916;368481;373107;393551;393650;403013;403036;405770;406463;406659;431715;436615;445223;492489;494180;550552;553788;557810;569903;570965;571331;57923;65237;767660;796425	pycard;shrprbck1r;plcb3;map3k7;pstpip1a;prkcda;atg16l1;vdac2;gbp1;gabarapl2;rbck1;irf7;stat1a;sugt1;irf9;mapk12b;nek7;atg12;bcl2l1;rhoac;birc2;rhoab;atg5;tank;stat1b;gabarapa;card9;cyba;jun;prkcdb;il1b;nfkbiab;mapk14a;nfkbiaa
dre03060	Protein export	http://www.kegg.jp/kegg-bin/show_pathway?dre03060+266796+327335+405884+406652+436772+436794+541342+606666+791986	22	9	2.76207	3.25843	0.000800582	0.0117904	266796;327335;405884;406652;436772;436794;541342;606666;791986	spcs3;spcs2;srp72;sec61b;srp19;sec11a;spcs1;sec61a1l;sec61g
dre00620	Pyruvate metabolism	http://www.kegg.jp/kegg-bin/show_pathway?dre00620+30497+324201+334197+335817+336977+368213+393938+399479+399662+406428+406702+436914+445233+541435	46	14	5.77523	2.42415	0.00107055	0.0144525	30497;324201;334197;335817;336977;368213;393938;399479;399662;406428;406702;436914;445233;541435	aldh7a1;dldh;glo1;dlat;pkma;me2;fh;acss2;pdhb;pdha1a;hagh;acss1;mdh1aa;ldhba
dre01210	2-Oxocarboxylic acid metabolism	http://www.kegg.jp/kegg-bin/show_pathway?dre01210+100006589+322339+322670+335974+386951+393926+406688+415247	20	8	2.51097	3.18602	0.00186755	0.0232725	100006589;322339;322670;335974;386951;393926;406688;415247	idh1;got2a;aco2;idh3a;cs;idh2;idh3b;got2b
dre04625	C-type lectin receptor signaling pathway	http://www.kegg.jp/kegg-bin/show_pathway?dre04625+100002263+100006041+100150844+259196+30190+30637+30768+321808+323099+334571+335916+368481+394174+403013+405769+405770+406463+406659+436920+556823+557810+557926+57923+65237+792160+796425	122	26	15.3169	1.69747	0.00419112	0.0484973	100002263;100006041;100150844;259196;30190;30637;30768;321808;323099;334571;335916;368481;394174;403013;405769;405770;406463;406659;436920;556823;557810;557926;57923;65237;792160;796425	pycard;ppp3cca;prkcda;calm3b;stat1a;irf9;irf1b;mapk12b;rhoac;egr3;syk;egr2b;rhoab;stat1b;pik3cb;malt2;pik3cd;card9;jun;prkcdb;mdm2;il1b;nfkbiab;cylda;mapk14a;nfkbiaa
Dendrogram 11
geneSet	description	link	size	overlap	expect	enrichmentRatio	pValue	FDR	overlapId	userId
GO:0007264	small GTPase mediated signal transduction	http://amigo.geneontology.org/amigo/term/GO:0007264	245	22	7.20158	3.05489	2.80794e-06	0.000797454	140617;321107;336839;368883;373105;386807;393945;393993;394117;394125;394132;406411;436839;445255;492355;559017;562838;793158;100003902;100005174;100093706;100329779	cdc42;rab13;rac1b;rhoaa;rock1;ralaa;rab5ab;ralba;arhgef4;rab8b;rhoca;rab10;rap1b;rab2a;dnmbp;ralab;rab5c;arhgdig;si:dkey-16l2.16;rab1ab;cdc42l;rab1ba
GO:0007163	establishment or maintenance of cell polarity	http://amigo.geneontology.org/amigo/term/GO:0007163	74	11	2.17517	5.05708	9.20418e-06	0.00130699	30291;325686;334527;336839;394125;406411;449660;777737;793158;100005469;100329779	cdc42;cdh2;parvb;rhoaa;clstn1;rock1;cap1;rras;rhoca;fn1a;cdc42l
GO:0030029	actin filament-based process	http://amigo.geneontology.org/amigo/term/GO:0030029	283	21	8.31856	2.52448	8.47545e-05	0.00802343	286746;321496;325686;334527;336839;373076;373105;394056;394125;394235;394243;399482;404601;406364;406384;406411;561894;563056;567039;793158;100329779	cdc42;gmfb;rab13;pacsin2;arpc5b;elmo1;nckap1;cdc42bpb;parvb;rhoaa;sdad1;rock1;cfl1;cap1;tpm3;hcls1;pfn2;arpc1a;rhoca;wasf2;cdc42l
GO:0022613	ribonucleoprotein complex biogenesis	http://amigo.geneontology.org/amigo/term/GO:0022613	204	16	5.99642	2.66826	0.000323257	0.0229513	286746;321114;322251;323426;323462;326786;327515;334234;336470;368737;394189;406324;436807;436970;553214;613144	eif3c;eif3s10;dkc1;abce1;exosc6;pa2g4a;nop16;sdad1;snu13b;eif4ba;mphosph10;pa2g4b;pak1ip1;rpl7l1;denr;eif3ja
GO:0044283	small molecule biosynthetic process	http://amigo.geneontology.org/amigo/term/GO:0044283	244	17	7.17218	2.37027	0.000831154	0.0438443	322626;327057;393441;393668;393787;402874;406725;431762;450013;553283;559148;560753;560944;564746;777635;790916;100005763	elovl1b;tpi1b;hsd17b12b;nudt3b;glsb;ipmkb;eno2;hacd3;pcxa;uck2b;eno1b;uck2a;pfkpa;plod1a;pcbd1;mgst1.2;ptgis
GO:0070727	cellular macromolecule localization	http://amigo.geneontology.org/amigo/term/GO:0070727	483	27	14.1974	1.90176	0.000926288	0.0438443	140617;286746;321739;322645;323462;326716;327272;337386;368737;368883;373105;386807;393945;394087;394117;406324;436605;436839;436951;445204;449827;553000;568263;100003206;100003902;100093706;100332088	arl6ip1;stx5a;arf6b;rab13;slc9a3r1a;abce1;timm10;tbc1d12b;pa2g4a;nutf2l;sdad1;tmed10;tomm40;pa2g4b;rab5ab;ipo7;si:dkeyp-19e1.3;rab8b;snx17;rab10;rab2a;rab5c;si:dkey-16l2.16;snx1a;rab1ab;nutf2;rab1ba
geneSet	description	link	size	overlap	expect	enrichmentRatio	pValue	FDR	overlapId	userId
GO:0007265	Ras protein signal transduction	http://amigo.geneontology.org/amigo/term/GO:0007265	213	22	5.4341	4.04851	2.29178e-08	9.19005e-05	140617;321107;336839;368883;373105;386807;393945;393993;394117;394125;394132;406411;436839;445255;492355;559017;562838;793158;100003902;100005174;100093706;100329779	cdc42;rab13;rac1b;rhoaa;rock1;ralaa;rab5ab;ralba;arhgef4;rab8b;rhoca;rab10;rap1b;rab2a;dnmbp;ralab;rab5c;arhgdig;si:dkey-16l2.16;rab1ab;cdc42l;rab1ba
GO:0006886	intracellular protein transport	http://amigo.geneontology.org/amigo/term/GO:0006886	350	27	8.92928	3.02376	2.68022e-07	0.000373239	140617;286746;321739;322645;323462;326716;327272;337386;368737;368883;373105;386807;393945;394087;394117;406324;436605;436839;436951;445204;449827;553000;568263;100003206;100003902;100093706;100332088	arl6ip1;stx5a;arf6b;rab13;slc9a3r1a;abce1;timm10;tbc1d12b;pa2g4a;nutf2l;sdad1;tmed10;tomm40;pa2g4b;rab5ab;ipo7;si:dkeyp-19e1.3;rab8b;snx17;rab10;rab2a;rab5c;si:dkey-16l2.16;snx1a;rab1ab;nutf2;rab1ba
GO:0007264	small GTPase mediated signal transduction	http://amigo.geneontology.org/amigo/term/GO:0007264	245	22	6.25049	3.51972	2.79231e-07	0.000373239	140617;321107;336839;368883;373105;386807;393945;393993;394117;394125;394132;406411;436839;445255;492355;559017;562838;793158;100003902;100005174;100093706;100329779	cdc42;rab13;rac1b;rhoaa;rock1;ralaa;rab5ab;ralba;arhgef4;rab8b;rhoca;rab10;rap1b;rab2a;dnmbp;ralab;rab5c;arhgdig;si:dkey-16l2.16;rab1ab;cdc42l;rab1ba
GO:0007163	establishment or maintenance of cell polarity	http://amigo.geneontology.org/amigo/term/GO:0007163	74	11	1.8879	5.82657	2.42939e-06	0.00230114	30291;325686;334527;336839;394125;406411;449660;777737;793158;100005469;100329779	cdc42;cdh2;parvb;rhoaa;clstn1;rock1;cap1;rras;rhoca;fn1a;cdc42l
GO:0044085	cellular component biogenesis	http://amigo.geneontology.org/amigo/term/GO:0044085	1038	51	26.4817	1.92586	2.86925e-06	0.00230114	30291;30682;286746;321114;321496;322251;323426;323462;323501;323597;325686;326786;327515;334234;336470;336839;337155;337220;338230;368260;368737;368883;373076;373105;394125;394189;394235;394243;399482;404601;406324;406364;406384;406411;436601;436807;436970;450041;503590;553214;553729;560944;561589;561894;562838;563056;613144;777737;793158;100005174;100329779	seta;cdc42;eif3c;eif3s10;nap1l1;gmfb;rab13;pacsin2;arpc5b;dkc1;elmo1;nckap1;unc119.1;rfx2;cdh2;abce1;exosc6;kctd6b;pa2g4a;nap1l4a;nop16;parvb;rac1b;rhoaa;sdad1;snu13b;eif4ba;ewsr1a;ccdc113;mphosph10;clstn1;pa2g4b;rock1;pak1ip1;dbnlb;cfl1;ezrb;tpm3;vegfaa;rpl7l1;pfkpa;hcls1;pfn2;arpc1a;rhoca;dnmbp;denr;eif3ja;emc6;rab1ab;cdc42l
GO:0015031	protein transport	http://amigo.geneontology.org/amigo/term/GO:0015031	503	31	12.8326	2.41571	4.40233e-06	0.00294222	140617;286746;321739;322645;323462;326716;327272;337386;338230;368737;368883;373105;386807;393945;394087;394117;406324;415135;436605;436839;436951;445204;449827;553000;553448;568263;793663;100003206;100003902;100093706;100332088	arl6ip1;stx5a;arf6b;rab13;slc9a3r1a;unc119.1;bet1;abce1;timm10;tbc1d12b;pa2g4a;nutf2l;sdad1;timm8b;tmed10;tomm40;pa2g4b;rrbp1a;rab5ab;ipo7;si:dkeyp-19e1.3;rab8b;snx17;rab10;rab2a;rab5c;si:dkey-16l2.16;snx1a;rab1ab;nutf2;rab1ba
GO:0015833	peptide transport	http://amigo.geneontology.org/amigo/term/GO:0015833	508	31	12.9602	2.39194	5.38983e-06	0.0030876	140617;286746;321739;322645;323462;326716;327272;337386;338230;368737;368883;373105;386807;393945;394087;394117;406324;415135;436605;436839;436951;445204;449827;553000;553448;568263;793663;100003206;100003902;100093706;100332088	arl6ip1;stx5a;arf6b;rab13;slc9a3r1a;unc119.1;bet1;abce1;timm10;tbc1d12b;pa2g4a;nutf2l;sdad1;timm8b;tmed10;tomm40;pa2g4b;rrbp1a;rab5ab;ipo7;si:dkeyp-19e1.3;rab8b;snx17;rab10;rab2a;rab5c;si:dkey-16l2.16;snx1a;rab1ab;nutf2;rab1ba
GO:0045184	establishment of protein localization	http://amigo.geneontology.org/amigo/term/GO:0045184	513	31	13.0878	2.36862	6.57763e-06	0.00317405	140617;286746;321739;322645;323462;326716;327272;337386;338230;368737;368883;373105;386807;393945;394087;394117;406324;415135;436605;436839;436951;445204;449827;553000;553448;568263;793663;100003206;100003902;100093706;100332088	arl6ip1;stx5a;arf6b;rab13;slc9a3r1a;unc119.1;bet1;abce1;timm10;tbc1d12b;pa2g4a;nutf2l;sdad1;timm8b;tmed10;tomm40;pa2g4b;rrbp1a;rab5ab;ipo7;si:dkeyp-19e1.3;rab8b;snx17;rab10;rab2a;rab5c;si:dkey-16l2.16;snx1a;rab1ab;nutf2;rab1ba
GO:0030036	actin cytoskeleton organization	http://amigo.geneontology.org/amigo/term/GO:0030036	275	21	7.01586	2.99322	7.12379e-06	0.00317405	286746;321496;325686;334527;336839;373076;373105;394056;394125;394235;394243;399482;404601;406364;406384;406411;561894;563056;567039;793158;100329779	cdc42;gmfb;rab13;pacsin2;arpc5b;elmo1;nckap1;cdc42bpb;parvb;rhoaa;sdad1;rock1;cfl1;cap1;tpm3;hcls1;pfn2;arpc1a;rhoca;wasf2;cdc42l
GO:0042886	amide transport	http://amigo.geneontology.org/amigo/term/GO:0042886	520	31	13.2664	2.33674	8.64702e-06	0.00346746	140617;286746;321739;322645;323462;326716;327272;337386;338230;368737;368883;373105;386807;393945;394087;394117;406324;415135;436605;436839;436951;445204;449827;553000;553448;568263;793663;100003206;100003902;100093706;100332088	arl6ip1;stx5a;arf6b;rab13;slc9a3r1a;unc119.1;bet1;abce1;timm10;tbc1d12b;pa2g4a;nutf2l;sdad1;timm8b;tmed10;tomm40;pa2g4b;rrbp1a;rab5ab;ipo7;si:dkeyp-19e1.3;rab8b;snx17;rab10;rab2a;rab5c;si:dkey-16l2.16;snx1a;rab1ab;nutf2;rab1ba
GO:0046907	intracellular transport	http://amigo.geneontology.org/amigo/term/GO:0046907	551	32	14.0572	2.27641	1.04692e-05	0.00370377	140617;282673;286746;321739;322645;323462;326716;327272;336839;337046;337386;368737;368883;373105;386807;393945;394087;394117;406324;406577;436605;436839;436951;445204;449827;553000;568263;777737;100003206;100003902;100093706;100332088	arl6ip1;cdc42;ranbp1;stx5a;arf6b;rab13;slc9a3r1a;abce1;timm10;tbc1d12b;pa2g4a;nutf2l;sdad1;tmed10;tomm40;clstn1;pa2g4b;plekhj1;rab5ab;ipo7;si:dkeyp-19e1.3;rab8b;snx17;rab10;rab2a;rab5c;si:dkey-16l2.16;snx1a;rab1ab;nutf2;npc2;rab1ba
GO:0030029	actin filament-based process	http://amigo.geneontology.org/amigo/term/GO:0030029	283	21	7.21996	2.9086	1.10836e-05	0.00370377	286746;321496;325686;334527;336839;373076;373105;394056;394125;394235;394243;399482;404601;406364;406384;406411;561894;563056;567039;793158;100329779	cdc42;gmfb;rab13;pacsin2;arpc5b;elmo1;nckap1;cdc42bpb;parvb;rhoaa;sdad1;rock1;cfl1;cap1;tpm3;hcls1;pfn2;arpc1a;rhoca;wasf2;cdc42l
GO:0032482	Rab protein signal transduction	http://amigo.geneontology.org/amigo/term/GO:0032482	60	9	1.53073	5.87954	1.88837e-05	0.00582491	140617;368883;373105;386807;393945;394117;436839;100003902;100093706	rab13;rab5ab;rab8b;rab10;rab2a;rab5c;si:dkey-16l2.16;rab1ab;rab1ba
GO:0000054	ribosomal subunit export from nucleus	http://amigo.geneontology.org/amigo/term/GO:0000054	9	4	0.22961	17.4208	4.71505e-05	0.0126049	286746;323462;368737;406324	abce1;pa2g4a;sdad1;pa2g4b
GO:0033750	ribosome localization	http://amigo.geneontology.org/amigo/term/GO:0033750	9	4	0.22961	17.4208	4.71505e-05	0.0126049	286746;323462;368737;406324	abce1;pa2g4a;sdad1;pa2g4b
GO:0006413	translational initiation	http://amigo.geneontology.org/amigo/term/GO:0006413	54	8	1.37766	5.80695	6.06491e-05	0.0145976	327515;334234;386945;394189;406324;436970;550549;553214	eif3c;eif3s10;abce1;eif4ba;eif4e1c;eif4ebp2;denr;eif3ja
GO:0022613	ribonucleoprotein complex biogenesis	http://amigo.geneontology.org/amigo/term/GO:0022613	204	16	5.20449	3.07427	6.54769e-05	0.0145976	286746;321114;322251;323426;323462;326786;327515;334234;336470;368737;394189;406324;436807;436970;553214;613144	eif3c;eif3s10;dkc1;abce1;exosc6;pa2g4a;nop16;sdad1;snu13b;eif4ba;mphosph10;pa2g4b;pak1ip1;rpl7l1;denr;eif3ja
GO:0048514	blood vessel morphogenesis	http://amigo.geneontology.org/amigo/term/GO:0048514	226	17	5.76576	2.94844	6.55253e-05	0.0145976	30682;286739;327263;336839;337131;373105;386807;393527;406364;447816;447847;494479;550256;553275;100005469;100535437;100535766	cdc42;rab13;ano6;msna;elmo1;hars;c1galt1b;gng2;ppp2r2ab;vegfbb;mtdhb;vegfaa;rtn4a;perp;pdcd10a;fn1a;rab5c
GO:0071428	rRNA-containing ribonucleoprotein complex export from nucleus	http://amigo.geneontology.org/amigo/term/GO:0071428	10	4	0.255122	15.6788	7.70105e-05	0.0162533	286746;323462;368737;406324	abce1;pa2g4a;sdad1;pa2g4b
GO:0034613	cellular protein localization	http://amigo.geneontology.org/amigo/term/GO:0034613	480	27	12.2459	2.20483	9.27104e-05	0.0185884	140617;286746;321739;322645;323462;326716;327272;337386;368737;368883;373105;386807;393945;394087;394117;406324;436605;436839;436951;445204;449827;553000;568263;100003206;100003902;100093706;100332088	arl6ip1;stx5a;arf6b;rab13;slc9a3r1a;abce1;timm10;tbc1d12b;pa2g4a;nutf2l;sdad1;tmed10;tomm40;pa2g4b;rab5ab;ipo7;si:dkeyp-19e1.3;rab8b;snx17;rab10;rab2a;rab5c;si:dkey-16l2.16;snx1a;rab1ab;nutf2;rab1ba
GO:0070727	cellular macromolecule localization	http://amigo.geneontology.org/amigo/term/GO:0070727	483	27	12.3224	2.19113	0.000102908	0.0196505	140617;286746;321739;322645;323462;326716;327272;337386;368737;368883;373105;386807;393945;394087;394117;406324;436605;436839;436951;445204;449827;553000;568263;100003206;100003902;100093706;100332088	arl6ip1;stx5a;arf6b;rab13;slc9a3r1a;abce1;timm10;tbc1d12b;pa2g4a;nutf2l;sdad1;tmed10;tomm40;pa2g4b;rab5ab;ipo7;si:dkeyp-19e1.3;rab8b;snx17;rab10;rab2a;rab5c;si:dkey-16l2.16;snx1a;rab1ab;nutf2;rab1ba
GO:0051649	establishment of localization in cell	http://amigo.geneontology.org/amigo/term/GO:0051649	629	32	16.0472	1.99412	0.000137455	0.0250543	140617;282673;286746;321739;322645;323462;326716;327272;336839;337046;337386;368737;368883;373105;386807;393945;394087;394117;406324;406577;436605;436839;436951;445204;449827;553000;568263;777737;100003206;100003902;100093706;100332088	arl6ip1;cdc42;ranbp1;stx5a;arf6b;rab13;slc9a3r1a;abce1;timm10;tbc1d12b;pa2g4a;nutf2l;sdad1;tmed10;tomm40;clstn1;pa2g4b;plekhj1;rab5ab;ipo7;si:dkeyp-19e1.3;rab8b;snx17;rab10;rab2a;rab5c;si:dkey-16l2.16;snx1a;rab1ab;nutf2;npc2;rab1ba
GO:0002183	cytoplasmic translational initiation	http://amigo.geneontology.org/amigo/term/GO:0002183	21	5	0.535757	9.3326	0.000151342	0.0253484	327515;334234;394189;436970;553214	eif3c;eif3s10;eif4ba;denr;eif3ja
GO:0046349	amino sugar biosynthetic process	http://amigo.geneontology.org/amigo/term/GO:0046349	5	3	0.127561	23.5181	0.000158033	0.0253484	393264;554143;556291	gnpda2;gnpnat1;uap1l1
GO:0006047	UDP-N-acetylglucosamine metabolic process	http://amigo.geneontology.org/amigo/term/GO:0006047	5	3	0.127561	23.5181	0.000158033	0.0253484	393264;554143;556291	gnpda2;gnpnat1;uap1l1
GO:0044283	small molecule biosynthetic process	http://amigo.geneontology.org/amigo/term/GO:0044283	244	17	6.22498	2.73093	0.000167588	0.0258472	322626;327057;393441;393668;393787;402874;406725;431762;450013;553283;559148;560753;560944;564746;777635;790916;100005763	elovl1b;tpi1b;hsd17b12b;nudt3b;glsb;ipmkb;eno2;hacd3;pcxa;uck2b;eno1b;uck2a;pfkpa;plod1a;pcbd1;mgst1.2;ptgis
GO:0072330	monocarboxylic acid biosynthetic process	http://amigo.geneontology.org/amigo/term/GO:0072330	80	9	2.04098	4.40965	0.000190012	0.0282203	322626;393441;393668;402874;406725;431762;559148;560753;560944	elovl1b;tpi1b;hsd17b12b;eno2;hacd3;eno1b;pfkpa;mgst1.2;ptgis
GO:0007015	actin filament organization	http://amigo.geneontology.org/amigo/term/GO:0007015	160	13	4.08195	3.18475	0.000223947	0.0320724	321496;334527;336839;373076;394125;394235;394243;399482;406384;406411;563056;793158;100329779	cdc42;gmfb;arpc5b;rhoaa;rock1;cfl1;cap1;tpm3;hcls1;pfn2;arpc1a;rhoca;cdc42l
GO:0002181	cytoplasmic translation	http://amigo.geneontology.org/amigo/term/GO:0002181	50	7	1.27561	5.48757	0.00025366	0.0350751	325284;327515;334234;394189;436808;436970;553214	eif3c;eif3s10;rwdd1;gspt1l;eif4ba;denr;eif3ja
GO:0001944	vasculature development	http://amigo.geneontology.org/amigo/term/GO:0001944	304	19	7.75571	2.44981	0.000286224	0.0368998	30682;286739;325284;327263;336839;337131;373105;386807;393527;406364;447816;447847;494479;550256;553275;565797;100005469;100535437;100535766	cdc42;rab13;ano6;msna;elmo1;hars;gspt1l;c1galt1b;gng2;ppp2r2ab;vegfbb;mtdhb;vegfaa;rtn4a;perp;pdcd10a;fn1a;lrp1ab;rab5c
GO:0090504	epiboly	http://amigo.geneontology.org/amigo/term/GO:0090504	51	7	1.30112	5.37997	0.000287707	0.0368998	321496;393945;394125;406411;558964;561589;100003206	arf6b;sec14l8;rhoaa;cfl1;ezrb;rab5ab;rhoca
GO:0071705	nitrogen compound transport	http://amigo.geneontology.org/amigo/term/GO:0071705	656	32	16.736	1.91204	0.000294462	0.0368998	140617;286746;321739;322645;323462;326716;327272;337386;338230;368737;368883;373105;386807;393945;394087;394117;406324;415135;436605;436839;436951;445204;449827;553000;553448;568263;569329;793663;100003206;100003902;100093706;100332088	arl6ip1;stx5a;arf6b;rab13;slc9a3r1a;flvcr2b;unc119.1;bet1;abce1;timm10;tbc1d12b;pa2g4a;nutf2l;sdad1;timm8b;tmed10;tomm40;pa2g4b;rrbp1a;rab5ab;ipo7;si:dkeyp-19e1.3;rab8b;snx17;rab10;rab2a;rab5c;si:dkey-16l2.16;snx1a;rab1ab;nutf2;rab1ba
GO:0001568	blood vessel development	http://amigo.geneontology.org/amigo/term/GO:0001568	257	17	6.55664	2.59279	0.000310226	0.0376972	30682;286739;327263;336839;337131;373105;386807;393527;406364;447816;447847;494479;550256;553275;100005469;100535437;100535766	cdc42;rab13;ano6;msna;elmo1;hars;c1galt1b;gng2;ppp2r2ab;vegfbb;mtdhb;vegfaa;rtn4a;perp;pdcd10a;fn1a;rab5c
GO:0001525	angiogenesis	http://amigo.geneontology.org/amigo/term/GO:0001525	188	14	4.7963	2.91892	0.000320709	0.0378248	30682;336839;337131;373105;386807;393527;406364;447816;447847;550256;553275;100005469;100535437;100535766	cdc42;rab13;ano6;elmo1;hars;c1galt1b;gng2;vegfbb;mtdhb;vegfaa;rtn4a;pdcd10a;fn1a;rab5c
GO:0016477	cell migration	http://amigo.geneontology.org/amigo/term/GO:0016477	388	22	9.89874	2.22251	0.000378035	0.0419631	30291;30682;280650;321107;334527;336839;373105;394087;394125;399482;406364;406411;447816;556770;557797;561589;561894;567039;569471;100005469;100535437;100535766	gpr183a;arl6ip1;cdc42;rab13;ano6;arpc5b;chd7;elmo1;nckap1;cdh2;cdc42bpb;rhoaa;vegfbb;cap1;ezrb;vegfaa;rtn4a;rhoca;fn1a;rap1b;klf6a;itgb2
GO:0008104	protein localization	http://amigo.geneontology.org/amigo/term/GO:0008104	637	31	16.2513	1.90754	0.000383418	0.0419631	140617;286746;321739;322645;323462;326716;327272;337386;338230;368737;368883;373105;386807;393945;394087;394117;406324;415135;436605;436839;436951;445204;449827;553000;553448;568263;793663;100003206;100003902;100093706;100332088	arl6ip1;stx5a;arf6b;rab13;slc9a3r1a;unc119.1;bet1;abce1;timm10;tbc1d12b;pa2g4a;nutf2l;sdad1;timm8b;tmed10;tomm40;pa2g4b;rrbp1a;rab5ab;ipo7;si:dkeyp-19e1.3;rab8b;snx17;rab10;rab2a;rab5c;si:dkey-16l2.16;snx1a;rab1ab;nutf2;rab1ba
GO:0002040	sprouting angiogenesis	http://amigo.geneontology.org/amigo/term/GO:0002040	70	8	1.78586	4.47965	0.000387191	0.0419631	30682;336839;447816;447847;550256;100005469;100535437;100535766	cdc42;ano6;hars;gng2;vegfbb;vegfaa;rtn4a;fn1a
GO:0072358	cardiovascular system development	http://amigo.geneontology.org/amigo/term/GO:0072358	313	19	7.98532	2.37937	0.000412631	0.0435434	30682;286739;325284;327263;336839;337131;373105;386807;393527;406364;447816;447847;494479;550256;553275;565797;100005469;100535437;100535766	cdc42;rab13;ano6;msna;elmo1;hars;gspt1l;c1galt1b;gng2;ppp2r2ab;vegfbb;mtdhb;vegfaa;rtn4a;perp;pdcd10a;fn1a;lrp1ab;rab5c
GO:0007010	cytoskeleton organization	http://amigo.geneontology.org/amigo/term/GO:0007010	503	26	12.8326	2.02608	0.000472599	0.048117	286746;321496;323597;325686;334527;336839;373076;373105;394056;394125;394235;394243;399482;404601;406364;406384;406411;436707;561894;563056;567039;777737;793158;100001267;100329779;100533983	havcr1;cdc42;gmfb;rab13;pacsin2;arpc5b;elmo1;nckap1;cdc42bpb;parvb;rhoaa;sdad1;ewsr1a;clstn1;rock1;cfl1;cap1;tpm3;eml3;hcls1;pfn2;arpc1a;rhoca;mast2;wasf2;cdc42l
GO:0042254	ribosome biogenesis	http://amigo.geneontology.org/amigo/term/GO:0042254	130	11	3.31659	3.31666	0.00047997	0.048117	286746;321114;322251;323426;323462;326786;336470;368737;406324;436807;613144	dkc1;abce1;exosc6;pa2g4a;nop16;sdad1;snu13b;mphosph10;pa2g4b;pak1ip1;rpl7l1
geneSet	description	link	size	overlap	expect	enrichmentRatio	pValue	FDR	overlapId	userId
dre04530	Tight junction	http://www.kegg.jp/kegg-bin/show_pathway?dre04530+100093706+100329779+286739+322221+327263+327272+336839+337223+337226+373080+373105+393154+406411+406582+554168+558359+561431+561589+562838+563056+564064+570216+57934+57935+793158	217	25	8.31235	3.00757	6.10318e-07	8.21691e-05	100093706;100329779;286739;322221;327263;327272;336839;337223;337226;373080;373105;393154;406411;406582;554168;558359;561431;561589;562838;563056;564064;570216;57934;57935;793158	actb1;tuba8l;actb2;cdc42;rab13;slc9a3r1a;msna;myh9b;actn4;afdna;ppp2cb;rac1b;rhoaa;ppp2r2ab;rock1;prkacaa;ezrb;rab8b;zgc:153867;hcls1;tuba1b;itgb1b;myh11a;tuba8l4;cdc42l
dre04810	Regulation of actin cytoskeleton	http://www.kegg.jp/kegg-bin/show_pathway?dre04810+100002928+100005469+100329779+101882585+114456+286739+321383+321496+322221+323285+336839+394056+394235+394243+399482+406411+445305+449660+550513+557797+559017+561589+561894+562838+570216+57934+57935+793158	269	28	10.3043	2.71732	1.01443e-06	8.21691e-05	100002928;100005469;100329779;101882585;114456;286739;321383;321496;322221;323285;336839;394056;394235;394243;399482;406411;445305;449660;550513;557797;559017;561589;561894;562838;570216;57934;57935;793158	actb1;arpc4l;actb2;arpc4;cdc42;arpc5b;iqgap1;msna;nckap1;actn4;rac1b;rhoaa;rock1;rras2;cfl1;ezrb;scinla;arhgef4;rras;pfn2l;pfn2;arpc1a;fn1a;itgb1b;itgb2;wasf2;si:dkey-32n7.4;cdc42l
dre05132	Salmonella infection	http://www.kegg.jp/kegg-bin/show_pathway?dre05132+100329779+114456+321383+336839+394056+394235+394243+399482+445305+562838+57934+57935+793158	97	13	3.71566	3.49871	7.24397e-05	0.00391174	100329779;114456;321383;336839;394056;394235;394243;399482;445305;562838;57934;57935;793158	actb1;arpc4l;actb2;arpc4;cdc42;arpc5b;rac1b;rock1;pfn2l;pfn2;arpc1a;wasf2;cdc42l
dre04144	Endocytosis	http://www.kegg.jp/kegg-bin/show_pathway?dre04144+100003206+100004988+100148154+114456+323870+336063+336839+337386+386807+393945+394243+399482+402861+406411+406669+436839+445305+474327+556277+561288+563459+565859+777731+791153+793158	311	25	11.9131	2.09853	0.000309533	0.0125361	100003206;100004988;100148154;114456;323870;336063;336839;337386;386807;393945;394243;399482;402861;406411;406669;436839;445305;474327;556277;561288;563459;565859;777731;791153;793158	arpc4l;arpc4;cdc42;arf6b;asap1b;arpc5b;capza1b;ccr2;cblb;rhoaa;agap1;ldlrap1b;clint1a;kif5ba;smap1;rab5ab;arpc1a;pdcd6ip;rab10;rab5c;grk6;snx1a;arf6a;cdc42l;rab11fip1b
Dendrogram 13
geneSet	description	link	size	overlap	expect	enrichmentRatio	pValue	FDR	overlapId	userId
GO:0000375	RNA splicing, via transesterification reactions	http://amigo.geneontology.org/amigo/term/GO:0000375	121	15	2.51487	5.96451	2.74688e-08	3.67166e-05	321852;323855;326944;387600;393476;393920;393979;402966;415157;436994;445217;566017;570205;573047;799690	prpf6;prpf4;mettl16;snrnp200;lsm8;snrpb;lsm7;snrpe;sf3b6;prpf31;crnkl1;isy1;tfip11;snw1;xab2
GO:0000377	RNA splicing, via transesterification reactions with bulged adenosine as nucleophile	http://amigo.geneontology.org/amigo/term/GO:0000377	121	15	2.51487	5.96451	2.74688e-08	3.67166e-05	321852;323855;326944;387600;393476;393920;393979;402966;415157;436994;445217;566017;570205;573047;799690	prpf6;prpf4;mettl16;snrnp200;lsm8;snrpb;lsm7;snrpe;sf3b6;prpf31;crnkl1;isy1;tfip11;snw1;xab2
GO:0000398	mRNA splicing, via spliceosome	http://amigo.geneontology.org/amigo/term/GO:0000398	121	15	2.51487	5.96451	2.74688e-08	3.67166e-05	321852;323855;326944;387600;393476;393920;393979;402966;415157;436994;445217;566017;570205;573047;799690	prpf6;prpf4;mettl16;snrnp200;lsm8;snrpb;lsm7;snrpe;sf3b6;prpf31;crnkl1;isy1;tfip11;snw1;xab2
GO:0006914	autophagy	http://amigo.geneontology.org/amigo/term/GO:0006914	103	13	2.14076	6.07261	1.92581e-07	0.00015445	30590;323929;336632;406466;406689;494487;555970;566871;568021;793200;795933;797906;100333062	soga1;mcoln1a;tp53;wdr81;nr1d1;atg4da;si:dkey-32e23.4;map1lc3a;snx14;mtmr14;gabarapb;atg3;tp53inp1
GO:0061919	process utilizing autophagic mechanism	http://amigo.geneontology.org/amigo/term/GO:0061919	103	13	2.14076	6.07261	1.92581e-07	0.00015445	30590;323929;336632;406466;406689;494487;555970;566871;568021;793200;795933;797906;100333062	soga1;mcoln1a;tp53;wdr81;nr1d1;atg4da;si:dkey-32e23.4;map1lc3a;snx14;mtmr14;gabarapb;atg3;tp53inp1
GO:0008380	RNA splicing	http://amigo.geneontology.org/amigo/term/GO:0008380	160	15	3.32545	4.51066	1.11568e-06	0.000745644	321852;323855;326944;387600;393476;393920;393979;402966;415157;436994;445217;566017;570205;573047;799690	prpf6;prpf4;mettl16;snrnp200;lsm8;snrpb;lsm7;snrpe;sf3b6;prpf31;crnkl1;isy1;tfip11;snw1;xab2
GO:0006397	mRNA processing	http://amigo.geneontology.org/amigo/term/GO:0006397	192	16	3.99054	4.00948	2.34175e-06	0.00134149	321852;323855;326944;387600;393476;393920;393979;402966;406251;415157;436994;445217;566017;570205;573047;799690	prpf6;rbm39a;prpf4;mettl16;snrnp200;lsm8;snrpb;lsm7;snrpe;sf3b6;prpf31;crnkl1;isy1;tfip11;snw1;xab2
GO:0007033	vacuole organization	http://amigo.geneontology.org/amigo/term/GO:0007033	47	7	0.976852	7.16588	4.70793e-05	0.0235985	336632;406466;431725;492340;553365;568021;793200	gnptab;cln3;rab7b;map1lc3a;gabarapb;atg3;tp53inp1
GO:0016071	mRNA metabolic process	http://amigo.geneontology.org/amigo/term/GO:0016071	248	16	5.15445	3.10411	5.8456e-05	0.0260454	321852;323855;326944;387600;393476;393920;393979;402966;406251;415157;436994;445217;566017;570205;573047;799690	prpf6;rbm39a;prpf4;mettl16;snrnp200;lsm8;snrpb;lsm7;snrpe;sf3b6;prpf31;crnkl1;isy1;tfip11;snw1;xab2
GO:0009056	catabolic process	http://amigo.geneontology.org/amigo/term/GO:0009056	756	32	15.7128	2.03656	8.43148e-05	0.0338102	30590;58035;321575;323929;336632;337166;387531;406466;406470;406615;406689;445217;449649;494487;553247;555970;558186;559072;559850;560986;565588;566871;568021;573047;792268;792966;793200;795933;797906;799099;100000399;100333062	soga1;mcoln1a;ubr3;gba;mettl16;tp53;cpvl;lsm7;ctsf;wdr81;pnpla6;si:dkey-40g16.6;enosf1;nr1d1;atg4da;maea;galca;fbxw4;lpin1;si:dkey-32e23.4;pla2g7;galk2;gpd1c;map1lc3a;neu1;snx14;si:ch211-122f10.4;mtmr14;dnase2;gabarapb;atg3;tp53inp1
geneSet	description	link	size	overlap	expect	enrichmentRatio	pValue	FDR	overlapId	userId
GO:0061919	process utilizing autophagic mechanism	http://amigo.geneontology.org/amigo/term/GO:0061919	103	13	2.36301	5.50147	5.70284e-07	0.000161961	30590;323929;336632;406466;406689;494487;555970;566871;568021;793200;795933;797906;100333062	soga1;mcoln1a;tp53;wdr81;nr1d1;atg4da;si:dkey-32e23.4;map1lc3a;snx14;mtmr14;gabarapb;atg3;tp53inp1
GO:0007033	vacuole organization	http://amigo.geneontology.org/amigo/term/GO:0007033	47	7	1.07827	6.49191	8.66832e-05	0.012309	336632;406466;431725;492340;553365;568021;793200	gnptab;cln3;rab7b;map1lc3a;gabarapb;atg3;tp53inp1
GO:0016071	mRNA metabolic process	http://amigo.geneontology.org/amigo/term/GO:0016071	248	16	5.68957	2.81216	0.000177231	0.0167779	321852;323855;326944;387600;393476;393920;393979;402966;406251;415157;436994;445217;566017;570205;573047;799690	prpf6;rbm39a;prpf4;mettl16;snrnp200;lsm8;snrpb;lsm7;snrpe;sf3b6;prpf31;crnkl1;isy1;tfip11;snw1;xab2
geneSet	description	link	size	overlap	expect	enrichmentRatio	pValue	FDR	overlapId	userId
dre04142	Lysosome	http://www.kegg.jp/kegg-bin/show_pathway?dre04142+100000085+100000399+100329505+100332784+324818+324985+327635+336746+337572+393128+406342+406625+406689+449649+450022+450068+492340+553365+553423+556700+559072+559850+565588+566506+566517+569719+791159+792966	146	28	3.86804	7.23881	0	0	100000085;100000399;100329505;100332784;324818;324985;327635;336746;337572;393128;406342;406625;406689;449649;450022;450068;492340;553365;553423;556700;559072;559850;565588;566506;566517;569719;791159;792966	ctsz;gnsb;mcoln1a;asah1a;hgsnat;si:ch73-12o23.1;gnptab;gba;gnsa;ctsf;tcirg1b;cln3;galca;lamp1a;sumf1;aga;galns;manba;neu1;smpd1;si:ch211-122f10.4;dnase2;ctsh;ctss2.2;napsa;nagpa;si:ch211-212k18.7;lgmn
dre03040	Spliceosome	http://www.kegg.jp/kegg-bin/show_pathway?dre03040+321852+323855+326944+334283+336645+387600+393476+393480+393850+393920+393979+402966+403072+415157+445404+550244+566017+567461+570205+573047+790924+799690	134	22	3.55012	6.19698	3.35865e-12	2.7205e-10	321852;323855;326944;334283;336645;387600;393476;393480;393850;393920;393979;402966;403072;415157;445404;550244;566017;567461;570205;573047;790924;799690	prpf6;dhx38;prpf4;prpf3;snrnp200;lsm8;snrpf;snrpb;lsm7;snrpd2;snrpe;sf3b6;eftud2;prpf31;crnkl1;isy1;usp39;snw1;xab2;dhx16;ddx23;u2surp
dre00600	Sphingolipid metabolism	http://www.kegg.jp/kegg-bin/show_pathway?dre00600+449649+450068+553646+556700+559072+559124+559850+567548	60	8	1.58961	5.0327	0.000161195	0.00870453	449649;450068;553646;556700;559072;559124;559850;567548	sptlc2a;asah1a;gba;ppap2d;smpd2a;galca;neu1;smpd1
Dendrogram 14
geneSet	description	link	size	overlap	expect	enrichmentRatio	pValue	FDR	overlapId	userId
GO:0006464	cellular protein modification process	http://amigo.geneontology.org/amigo/term/GO:0006464	1630	74	43.8327	1.68824	1.79234e-06	0.00359365	30502;170782;192302;321602;321622;321732;323269;323994;324125;324835;325470;326088;334099;334300;335124;337866;368329;368425;368439;373881;393319;393911;393998;394112;402862;405816;406260;406477;415242;436877;445076;445567;449927;492506;494533;503607;550572;554152;555476;556042;556678;557208;557602;557995;559073;560313;563181;563460;563644;563884;564859;565118;565434;566102;566841;569081;570531;5…	galnt1;cdkn1ba;rnf19a;ezh2;si:dkey-112a7.4;clk4b;csnk2a1;usp4;crebbpa;si:ch211-160o17.4;mycbp2;birc6;ppme1;brd4;ube2q2;cdk9;cnep1r1;prkacba;pptc7a;dyrk2;ctr9;nlk2;ptk6b;rap1aa;prkacab;camk1b;csnk1g2a;fbxl14b;morf4l1;rerea;cul4b;cul3b;epc1b;limk1b;kdm6bb;map2k2a;mkrn1;pigc;ppp2r5cb;prkar1aa;usp8;shoc2;stk3;stk40;supt6h;tgfb1b;ube2h;zbtb16a;zdhhc5a;galnt6;mark3a;camk2g1;naa15b;ing3;tbk1;setd2;hdac1…
GO:0036211	protein modification process	http://amigo.geneontology.org/amigo/term/GO:0036211	1630	74	43.8327	1.68824	1.79234e-06	0.00359365	30502;170782;192302;321602;321622;321732;323269;323994;324125;324835;325470;326088;334099;334300;335124;337866;368329;368425;368439;373881;393319;393911;393998;394112;402862;405816;406260;406477;415242;436877;445076;445567;449927;492506;494533;503607;550572;554152;555476;556042;556678;557208;557602;557995;559073;560313;563181;563460;563644;563884;564859;565118;565434;566102;566841;569081;570531;5…	galnt1;cdkn1ba;rnf19a;ezh2;si:dkey-112a7.4;clk4b;csnk2a1;usp4;crebbpa;si:ch211-160o17.4;mycbp2;birc6;ppme1;brd4;ube2q2;cdk9;cnep1r1;prkacba;pptc7a;dyrk2;ctr9;nlk2;ptk6b;rap1aa;prkacab;camk1b;csnk1g2a;fbxl14b;morf4l1;rerea;cul4b;cul3b;epc1b;limk1b;kdm6bb;map2k2a;mkrn1;pigc;ppp2r5cb;prkar1aa;usp8;shoc2;stk3;stk40;supt6h;tgfb1b;ube2h;zbtb16a;zdhhc5a;galnt6;mark3a;camk2g1;naa15b;ing3;tbk1;setd2;hdac1…
GO:0043412	macromolecule modification	http://amigo.geneontology.org/amigo/term/GO:0043412	1725	74	46.3874	1.59526	1.46119e-05	0.0195312	30502;170782;192302;321602;321622;321732;323269;323994;324125;324835;325470;326088;334099;334300;335124;337866;368329;368425;368439;373881;393319;393911;393998;394112;402862;405816;406260;406477;415242;436877;445076;445567;449927;492506;494533;503607;550572;554152;555476;556042;556678;557208;557602;557995;559073;560313;563181;563460;563644;563884;564859;565118;565434;566102;566841;569081;570531;5…	galnt1;cdkn1ba;rnf19a;ezh2;si:dkey-112a7.4;clk4b;csnk2a1;usp4;crebbpa;si:ch211-160o17.4;mycbp2;birc6;ppme1;brd4;ube2q2;cdk9;cnep1r1;prkacba;pptc7a;dyrk2;ctr9;nlk2;ptk6b;rap1aa;prkacab;camk1b;csnk1g2a;fbxl14b;morf4l1;rerea;cul4b;cul3b;epc1b;limk1b;kdm6bb;map2k2a;mkrn1;pigc;ppp2r5cb;prkar1aa;usp8;shoc2;stk3;stk40;supt6h;tgfb1b;ube2h;zbtb16a;zdhhc5a;galnt6;mark3a;camk2g1;naa15b;ing3;tbk1;setd2;hdac1…
GO:0006325	chromatin organization	http://amigo.geneontology.org/amigo/term/GO:0006325	280	21	7.52955	2.78901	2.09751e-05	0.0210276	192302;321622;337866;393319;393357;393911;406562;436877;556678;563644;566102;566841;569081;570531;570900;768133;794108;794199;799716;100036549;100331225	ezh2;crebbpa;smarcb1a;brd4;atad2b;ctr9;nipblb;morf4l1;nipbla;rerea;elof1;anp32e;epc1b;kdm6bb;supt6h;ing3;setd2;hdac1;cdc73;kdm6ba;hmgb1a
GO:0006397	mRNA processing	http://amigo.geneontology.org/amigo/term/GO:0006397	192	16	5.16312	3.0989	5.9235e-05	0.0462619	321555;327011;337866;368735;393319;394053;404041;492511;493614;541556;550495;560384;563948;570994;572679;100005893	gpkow;lsm5;eif4a3;magoh;snrpa1;papola;cirbpa;bcas2;rbm39b;prpf40a;supt6h;smndc1;cdc73;snrpd3l;sf3b2;mbnl2
GO:0047496	vesicle transport along microtubule	http://amigo.geneontology.org/amigo/term/GO:0047496	10	4	0.268913	14.8747	9.45362e-05	0.0462619	333957;394244;394247;563359	pafah1b1b;ndel1a;ap3d1;ndel1b
GO:0099518	vesicle cytoskeletal trafficking	http://amigo.geneontology.org/amigo/term/GO:0099518	10	4	0.268913	14.8747	9.45362e-05	0.0462619	333957;394244;394247;563359	pafah1b1b;ndel1a;ap3d1;ndel1b
GO:0051171	regulation of nitrogen compound metabolic process	http://amigo.geneontology.org/amigo/term/GO:0051171	1919	77	51.6043	1.49212	9.82222e-05	0.0462619	30396;30606;30639;30680;30744;57933;58065;58110;81884;192302;321602;321622;321681;323479;324125;325410;326088;326668;326857;337866;368329;368439;368632;373118;373881;393202;393319;393357;394053;394112;402862;405816;406514;406632;415100;415242;436877;494107;494533;550495;550572;553082;554861;555364;555432;556042;556410;557208;557995;558760;560384;561772;563181;563884;566102;566352;566841;569081;57…	cbfb;nfkb2;ncoa2;cdkn1ba;notch2;atf4a;rnf19a;elf1;si:dkey-112a7.4;actr2b;drap1;crebbpa;casp2;smarcb1a;mycbp2;gabpa;birc6;foxj3;ss18;eif4a3;brd4;cnot9;taf15;zdhhc13;cdk9;cnep1r1;magoh;cirbpa;crema;caspa;gclc;hif1ab;atad2b;ctr9;si:zfos-1192g2.3;rap1aa;arid2;nipblb;crebrf;morf4l1;nipbla;rerea;elof1;epc1b;klf7b;map2k2a;nfatc3a;ppp2r5cb;prkar1aa;tnfrsf1b;rarab;rarga;stk3;supt6h;tgfb1b;atf4b;ormdl1;set…
GO:0060349	bone morphogenesis	http://amigo.geneontology.org/amigo/term/GO:0060349	30	6	0.806738	7.43736	0.00012338	0.0462619	30606;30680;58065;378746;415242;555364	notch2;atp2b1a;rap1aa;rarab;rarga;raraa
GO:0016071	mRNA metabolic process	http://amigo.geneontology.org/amigo/term/GO:0016071	248	18	6.66903	2.69904	0.000125122	0.0462619	321555;327011;337866;368735;393319;394053;404041;406632;492511;493614;541556;550495;560384;563948;565522;570994;572679;100005893	gpkow;lsm5;eif4a3;cnot9;magoh;snrpa1;papola;cirbpa;bcas2;rbm39b;prpf40a;supt6h;smndc1;cdc73;pnrc2;snrpd3l;sf3b2;mbnl2
GO:0060255	regulation of macromolecule metabolic process	http://amigo.geneontology.org/amigo/term/GO:0060255	1998	79	53.7287	1.47035	0.000126903	0.0462619	30396;30606;30639;30680;30744;57933;58065;58110;81884;192302;321602;321622;321681;323479;324125;325410;326088;326668;326857;337866;368329;368632;373118;373881;393202;393319;393357;394053;394112;402862;405816;406514;406632;415100;415242;436877;494107;494533;550495;550572;553082;554861;555364;555432;556042;556410;557208;557995;558760;560384;561772;563181;563460;563884;565522;566102;566352;566841;56…	cbfb;nfkb2;ncoa2;cdkn1ba;notch2;atf4a;rnf19a;ezh2;elf1;si:dkey-112a7.4;actr2b;drap1;crebbpa;casp2;smarcb1a;gabpa;birc6;foxj3;ss18;eif4a3;brd4;cnot9;taf15;zdhhc13;cdk9;cnep1r1;magoh;cirbpa;crema;caspa;gclc;hif1ab;atad2b;ctr9;si:zfos-1192g2.3;nlk2;rap1aa;arid2;nipblb;crebrf;morf4l1;nipbla;rerea;elof1;epc1b;klf7b;map2k2a;nfatc3a;ppp2r5cb;prkar1aa;tnfrsf1b;rarab;rarga;stk3;supt6h;tgfb1b;atf4b;ormdl1;…
geneSet	description	link	size	overlap	expect	enrichmentRatio	pValue	FDR	overlapId	userId
dre03040	Spliceosome	http://www.kegg.jp/kegg-bin/show_pathway?dre03040+100005893+321555+322206+327011+327495+334490+373077+378453+394053+394059+446168+492511+493614+562370+563948+570994+572679+796388	134	18	4.09281	4.39795	9.60369e-08	1.5558e-05	100005893;321555;322206;327011;327495;334490;373077;378453;394053;394059;446168;492511;493614;562370;563948;570994;572679;796388	acin1b;sf3a3;lsm5;eif4a3;magoh;snrpa1;hnrnpa1b;cdc5l;hnrnpub;puf60a;bcas2;prpf40a;smndc1;ddx5;snrpd3l;sf3a1;thoc1;sf3b2
dre04217	Necroptosis	http://www.kegg.jp/kegg-bin/show_pathway?dre04217+100536675+30280+30298+321622+373108+393386+393896+403051+406471+406621+406766+57933+58108+791855+793359+798901	180	16	5.49781	2.91025	0.000107785	0.0087306	100536675;30280;30298;321622;373108;393386;393896;403051;406471;406621;406766;57933;58108;791855;793359;798901	tyk2;chmp3;jak2b;caspa;chmp2a;dnm1l;camk2g2;camk2g1;tnfrsf1a;fth1a;chmp4bb;jak1;hmgb1a;pygb;cybb;xiap
dre05168	Herpes simplex infection	http://www.kegg.jp/kegg-bin/show_pathway?dre05168+100536675+140621+30280+30298+30502+333979+334474+406204+406471+406816+437024+494163+566841+692289+791704	185	15	5.65052	2.65462	0.000484879	0.0261835	100536675;140621;30280;30298;30502;333979;334474;406204;406471;406816;437024;494163;566841;692289;791704	tyk2;csnk2a1;ikbke;crebbpa;jak2b;ptpn11a;casp3a;tab2;zgc:153759;tbk1;tnfrsf1a;cul1b;taf3;jak1;per1b
dre04012	ErbB signaling pathway	http://www.kegg.jp/kegg-bin/show_pathway?dre04012+324254+325034+368329+373867+402862+556443+561747+563181+791855+793359	106	10	3.2376	3.08871	0.00138404	0.0468183	324254;325034;368329;373867;402862;556443;561747;563181;791855;793359	cdkn1ba;plcg2;crkl;pak2b;camk2g2;map2k2a;plcg1;camk2g1;mtor;cdkn1bb
dre04340	Hedgehog signaling pathway	http://www.kegg.jp/kegg-bin/show_pathway?dre04340+100005514+324655+393998+406816+445076+554152+572370	56	7	1.71043	4.09254	0.00144501	0.0468183	100005514;324655;393998;406816;445076;554152;572370	prkacba;prkacab;csnk1g2a;cul3a;cul3b;cul1b;spop
Dendrogram 16
geneSet	description	link	size	overlap	expect	enrichmentRatio	pValue	FDR	overlapId	userId
GO:0009062	fatty acid catabolic process	http://amigo.geneontology.org/amigo/term/GO:0009062	21	6	0.204787	29.2987	3.55832e-08	0.000142688	431754;445182;445288;445290;553401;100005717	hadhaa;acat1;cpt2;acaa1;acads;auh
GO:0006635	fatty acid beta-oxidation	http://amigo.geneontology.org/amigo/term/GO:0006635	15	5	0.146277	34.1818	2.2142e-07	0.000360301	431754;445182;445290;553401;100005717	hadhaa;acat1;cpt2;acaa1;auh
GO:0072329	monocarboxylic acid catabolic process	http://amigo.geneontology.org/amigo/term/GO:0072329	29	6	0.282801	21.2163	2.9247e-07	0.000360301	431754;445182;445288;445290;553401;100005717	hadhaa;acat1;cpt2;acaa1;acads;auh
GO:0019395	fatty acid oxidation	http://amigo.geneontology.org/amigo/term/GO:0019395	17	5	0.16578	30.1604	4.49253e-07	0.000360301	431754;445182;445290;553401;100005717	hadhaa;acat1;cpt2;acaa1;auh
GO:0034440	lipid oxidation	http://amigo.geneontology.org/amigo/term/GO:0034440	17	5	0.16578	30.1604	4.49253e-07	0.000360301	431754;445182;445290;553401;100005717	hadhaa;acat1;cpt2;acaa1;auh
GO:0044282	small molecule catabolic process	http://amigo.geneontology.org/amigo/term/GO:0044282	103	9	1.00443	8.96028	6.49953e-07	0.000434386	334897;402822;431754;445182;445288;445290;553401;791130;100005717	hadhaa;acat1;galt;cpt2;acaa1;rpe;gcat;acads;auh
GO:0044242	cellular lipid catabolic process	http://amigo.geneontology.org/amigo/term/GO:0044242	60	7	0.585106	11.9636	1.71369e-06	0.000981697	431754;445182;445288;445290;553401;767657;100005717	hadhaa;acat1;cpt2;acaa1;abhd12;acads;auh
GO:0016054	organic acid catabolic process	http://amigo.geneontology.org/amigo/term/GO:0016054	71	7	0.692376	10.1101	5.40717e-06	0.0024092	402822;431754;445182;445288;445290;553401;100005717	hadhaa;acat1;cpt2;acaa1;gcat;acads;auh
GO:0046395	carboxylic acid catabolic process	http://amigo.geneontology.org/amigo/term/GO:0046395	71	7	0.692376	10.1101	5.40717e-06	0.0024092	402822;431754;445182;445288;445290;553401;100005717	hadhaa;acat1;cpt2;acaa1;gcat;acads;auh
GO:0006631	fatty acid metabolic process	http://amigo.geneontology.org/amigo/term/GO:0006631	78	7	0.760638	9.2028	1.01608e-05	0.00407449	431754;445182;445288;445290;553401;799964;100005717	hadhaa;acat1;cpt2;acaa1;ptgesl;acads;auh
GO:0016042	lipid catabolic process	http://amigo.geneontology.org/amigo/term/GO:0016042	83	7	0.809397	8.64841	1.5347e-05	0.00559466	431754;445182;445288;445290;553401;767657;100005717	hadhaa;acat1;cpt2;acaa1;abhd12;acads;auh
GO:0044281	small molecule metabolic process	http://amigo.geneontology.org/amigo/term/GO:0044281	687	19	6.69947	2.83605	2.94301e-05	0.00983457	324079;334897;402822;402886;406330;415197;431754;436949;445182;445288;445290;447802;550579;553401;566723;573021;791130;799964;100005717	bcat2;hadhaa;acat1;coq5;galt;idh3g;got1;cpt2;adi1;acaa1;rpe;nudt15;gcat;ptgesl;ndufb9;uqcrh;mmadhc;acads;auh
GO:0019752	carboxylic acid metabolic process	http://amigo.geneontology.org/amigo/term/GO:0019752	312	12	3.04255	3.94406	4.84217e-05	0.0142857	324079;402822;406330;431754;436949;445182;445288;445290;550579;553401;799964;100005717	bcat2;hadhaa;acat1;idh3g;got1;cpt2;adi1;acaa1;gcat;ptgesl;acads;auh
GO:0055114	oxidation-reduction process	http://amigo.geneontology.org/amigo/term/GO:0055114	531	16	5.17819	3.08988	4.98753e-05	0.0142857	324079;431754;436868;436985;445182;445288;445290;447859;450078;492710;550579;553401;566723;573021;799964;100005717	hadhaa;acat1;egln1b;idh3g;cpt2;aldh16a1;adi1;acaa1;cox20;ptgesl;ndufb9;uqcrh;hsd17b10;etfdh;acads;auh
GO:0007005	mitochondrion organization	http://amigo.geneontology.org/amigo/term/GO:0007005	138	8	1.34574	5.94466	5.75599e-05	0.0153877	335894;393111;393734;393757;436985;559037;564985;569168	dnaja3a;mief1;dnajc19;cox20;chchd10;samm50;grpel1;afg3l2
GO:0043436	oxoacid metabolic process	http://amigo.geneontology.org/amigo/term/GO:0043436	324	12	3.15957	3.79798	6.97177e-05	0.017473	324079;402822;406330;431754;436949;445182;445288;445290;550579;553401;799964;100005717	bcat2;hadhaa;acat1;idh3g;got1;cpt2;adi1;acaa1;gcat;ptgesl;acads;auh
GO:0006082	organic acid metabolic process	http://amigo.geneontology.org/amigo/term/GO:0006082	342	12	3.33511	3.59809	0.000116697	0.0275267	324079;402822;406330;431754;436949;445182;445288;445290;550579;553401;799964;100005717	bcat2;hadhaa;acat1;idh3g;got1;cpt2;adi1;acaa1;gcat;ptgesl;acads;auh
geneSet	description	link	size	overlap	expect	enrichmentRatio	pValue	FDR	overlapId	userId
GO:0044282	small molecule catabolic process	http://amigo.geneontology.org/amigo/term/GO:0044282	103	9	1.14458	7.86314	1.85886e-06	0.000527915	334897;402822;431754;445182;445288;445290;553401;791130;100005717	hadhaa;acat1;galt;cpt2;acaa1;rpe;gcat;acads;auh
GO:0007005	mitochondrion organization	http://amigo.geneontology.org/amigo/term/GO:0007005	138	8	1.53352	5.21677	0.000139728	0.0198413	335894;393111;393734;393757;436985;559037;564985;569168	dnaja3a;mief1;dnajc19;cox20;chchd10;samm50;grpel1;afg3l2
GO:0006082	organic acid metabolic process	http://amigo.geneontology.org/amigo/term/GO:0006082	342	12	3.80045	3.15752	0.000376982	0.0356876	324079;402822;406330;431754;436949;445182;445288;445290;550579;553401;799964;100005717	bcat2;hadhaa;acat1;idh3g;got1;cpt2;adi1;acaa1;gcat;ptgesl;acads;auh
geneSet	description	link	size	overlap	expect	enrichmentRatio	pValue	FDR	overlapId	userId
dre00280	Valine, leucine and isoleucine degradation	http://www.kegg.jp/kegg-bin/show_pathway?dre00280+368239+368775+405863+431754+436949+437019+445182+445288+445290+450078+492710+553401+569980	55	13	0.81674	15.9169	6.00742e-13	9.73202e-11	368239;368775;405863;431754;436949;437019;445182;445288;445290;450078;492710;553401;569980	aldh2.2;ivd;bcat2;hadhaa;acat1;aldh16a1;acaa1;pcca;mccc2;hsd17b10;bckdhb;acads;auh
dre00071	Fatty acid degradation	http://www.kegg.jp/kegg-bin/show_pathway?dre00071+100005717+334101+368239+431754+436918+445288+445290+492710+553401	46	9	0.683091	13.1754	1.62992e-08	1.32024e-06	100005717;334101;368239;431754;436918;445288;445290;492710;553401	aldh2.2;eci1;hadhaa;acat1;eci2;cpt2;aldh16a1;acaa1;acads
dre01100	Metabolic pathways	http://www.kegg.jp/kegg-bin/show_pathway?dre01100+100126013+30740+324079+334897+368239+368775+394188+405863+406330+406370+431754+436826+436949+437019+445182+445288+445290+447802+449655+449829+450078+492710+493780+541429+550579+553401+553610+566723+568096+569980+571938+573021+751596+791130+797914+799964	1363	36	20.2403	1.77863	0.000122081	0.00659235	100126013;30740;324079;334897;368239;368775;394188;405863;406330;406370;431754;436826;436949;437019;445182;445288;445290;447802;449655;449829;450078;492710;493780;541429;550579;553401;553610;566723;568096;569980;571938;573021;751596;791130;797914;799964	aldh2.2;nagk;ivd;polr3k;pld3;bcat2;hadhaa;acat1;coq5;atp6v1c1b;ext2;galt;pla2g6;idh3g;got1;cryl1;aoc2;aldh16a1;adi1;acaa1;smpd2b;rpe;olah;rrm1;pcca;ptgesl;mccc2;ndufb9;uqcrh;hsd17b10;galk1;qars;bckdhb;acads;auh;pole4
dre00640	Propanoate metabolism	http://www.kegg.jp/kegg-bin/show_pathway?dre00640+437019+445290+553401+569980	32	4	0.475194	8.41761	0.00118855	0.0451696	437019;445290;553401;569980	hadhaa;acat1;pcca;bckdhb
dre01212	Fatty acid metabolism	http://www.kegg.jp/kegg-bin/show_pathway?dre01212+100005717+431754+445288+445290+553401	57	5	0.846439	5.9071	0.0014693	0.0451696	100005717;431754;445288;445290;553401	hadhaa;acat1;cpt2;acaa1;acads
dre00410	beta-Alanine metabolism	http://www.kegg.jp/kegg-bin/show_pathway?dre00410+368239+492710+541429+553401	35	4	0.519744	7.6961	0.00167295	0.0451696	368239;492710;541429;553401	aldh2.2;hadhaa;aoc2;aldh16a1
Dendrogram 17
geneSet	description	link	size	overlap	expect	enrichmentRatio	pValue	FDR	overlapId	userId
GO:0006259	DNA metabolic process	http://amigo.geneontology.org/amigo/term/GO:0006259	293	33	4.24261	7.77823	0	0	30733;192314;321544;324256;327491;386707;393360;394048;402986;406487;406593;406695;406778;406839;407653;436824;445058;445395;445819;449820;492631;492655;492768;541386;553405;553516;563218;565592;565952;569270;768137;768152;797342	pole;abraxas1;dtl;nsmce1;cdc45;e2f8;ube2t;mus81;fen1;nhej1;orc6;helb;h2afx;exo1;dclre1b;cry-dash;cenps;stn1;tdp2b;tipin;rrm2;rmi2;rad51;esco2;cdc7;xpc;wdr18;prpf19;paxx;pds5b;tonsl;prim2;rpa1
GO:0006974	cellular response to DNA damage stimulus	http://amigo.geneontology.org/amigo/term/GO:0006974	240	30	3.47518	8.63265	0	0	192314;321544;327491;368235;386707;393162;393872;394048;402986;406487;406593;406695;406778;406839;407679;436824;445058;449820;492631;492655;492768;541386;553405;553516;563218;565592;569270;768137;768152;797342	pole;abraxas1;dtl;nsmce1;cdc45;ube2t;mus81;fen1;nhej1;helb;h2afx;exo1;dclre1b;cry-dash;chek1;cenps;yars;tdp2b;topbp1;tipin;rmi2;rad51;rad1;cdc7;xpc;prpf19;paxx;pds5b;tonsl;rpa1
GO:0006281	DNA repair	http://amigo.geneontology.org/amigo/term/GO:0006281	173	25	2.50502	9.97995	0	0	192314;321544;327491;386707;394048;402986;406487;406593;406695;406778;406839;436824;449820;492631;492655;492768;541386;553405;553516;563218;565592;569270;768137;768152;797342	pole;abraxas1;dtl;nsmce1;cdc45;ube2t;mus81;fen1;nhej1;helb;h2afx;exo1;dclre1b;cry-dash;cenps;tdp2b;rmi2;rad51;cdc7;xpc;prpf19;paxx;pds5b;tonsl;rpa1
GO:0006260	DNA replication	http://amigo.geneontology.org/amigo/term/GO:0006260	84	17	1.21631	13.9767	2.44249e-15	2.4486e-12	30733;192314;324256;327491;386707;406487;406695;407653;445058;445395;445819;492655;492768;553405;565952;569270;797342	pole;dtl;cdc45;e2f8;fen1;orc6;helb;cenps;tipin;rrm2;rad51;esco2;cdc7;wdr18;tonsl;prim2;rpa1
GO:0033554	cellular response to stress	http://amigo.geneontology.org/amigo/term/GO:0033554	438	32	6.3422	5.04557	1.57652e-14	1.2614e-11	192314;321544;327491;368235;386707;393162;393872;394048;402986;406487;406593;406695;406778;406839;407679;436824;436933;445058;449820;492631;492655;492768;541386;553405;553516;563218;565232;565592;569270;768137;768152;797342	pole;abraxas1;dtl;nsmce1;cdc45;ube2t;mus81;fen1;nhej1;hspa14;helb;h2afx;exo1;dclre1b;cry-dash;chek1;cenps;yars;tdp2b;topbp1;tipin;rmi2;rad51;rad1;cdc7;xpc;sesn1;prpf19;paxx;pds5b;tonsl;rpa1
GO:0006261	DNA-dependent DNA replication	http://amigo.geneontology.org/amigo/term/GO:0006261	54	14	0.781915	17.9048	1.88738e-14	1.2614e-11	324256;327491;386707;406487;406695;407653;445058;445819;492655;492768;553405;565952;569270;797342	pole;cdc45;e2f8;fen1;orc6;helb;cenps;tipin;rad51;cdc7;wdr18;tonsl;prim2;rpa1
GO:0007049	cell cycle	http://amigo.geneontology.org/amigo/term/GO:0007049	506	34	7.32683	4.64048	2.43139e-14	1.39284e-11	192314;326076;327491;386701;386707;393162;393872;394048;403012;406487;406695;406747;406778;406839;407679;436865;445058;445386;445395;445819;449820;492707;553405;558540;560495;563218;563517;563708;565592;565952;567359;569270;570062;768137	pole;abraxas1;dtl;cdc45;e2f8;bub3;ncapg;sass6;mus81;ncaph;ndc80;fen1;pagr1;h2afx;exo1;dclre1b;chek1;cenps;tubgcp3;topbp1;tipin;skp2;ska1;rmi2;rad51;rad1;esco2;cenph;wdr18;si:ch211-195d17.2;mybl1;pds5b;rpa1;tubb5
GO:0022402	cell cycle process	http://amigo.geneontology.org/amigo/term/GO:0022402	302	26	4.37293	5.94567	1.45883e-13	7.3124e-11	192314;326076;386707;393162;403012;406487;406695;406747;406778;406839;407679;445058;445386;445395;445819;449820;492707;563218;563517;563708;565592;565952;567359;569270;570062;768137	abraxas1;dtl;cdc45;e2f8;bub3;ncapg;sass6;mus81;ncaph;ndc80;fen1;pagr1;exo1;dclre1b;chek1;cenps;tubgcp3;topbp1;tipin;skp2;rmi2;rad51;esco2;cenph;wdr18;pds5b
GO:0006302	double-strand break repair	http://amigo.geneontology.org/amigo/term/GO:0006302	77	15	1.11495	13.4535	2.04836e-13	9.12659e-11	327491;406487;406593;406695;406778;406839;436824;449820;492631;492655;492768;553516;563218;768137;797342	abraxas1;nsmce1;cdc45;mus81;nhej1;helb;exo1;dclre1b;tdp2b;rmi2;rad51;cdc7;paxx;tonsl;rpa1
GO:0051276	chromosome organization	http://amigo.geneontology.org/amigo/term/GO:0051276	413	28	5.9802	4.68212	5.5107e-12	2.20979e-09	326076;327491;368856;386707;386897;393245;393360;394048;403012;406487;406695;445386;445395;447833;449820;492707;561871;562348;563218;565592;567359;569270;569277;570062;768137;792029;797342;799570	supt16h;abraxas1;cdc45;bub3;ncapg;kdm6a;ncaph;ndc80;fen1;pagr1;helb;hat1;h2afx;dclre1b;cenps;cenpn;asf1bb;asf1ba;stn1;rmi2;rad51;esco2;cenph;pds5b;rpa1;nasp;brd9;suz12b
GO:0000278	mitotic cell cycle	http://amigo.geneontology.org/amigo/term/GO:0000278	276	23	3.99645	5.7551	8.51119e-12	3.10272e-09	192314;386701;393162;403012;406487;406695;406747;406839;407679;436865;445058;445386;445395;492707;553405;558540;563517;563708;565592;565952;567359;570062;768137	pole;dtl;cdc45;e2f8;bub3;ncapg;sass6;mus81;ncaph;ndc80;dclre1b;chek1;tubgcp3;topbp1;tipin;skp2;ska1;rad51;esco2;cenph;mybl1;pds5b;tubb5
GO:0006950	response to stress	http://amigo.geneontology.org/amigo/term/GO:0006950	837	37	12.1197	3.05289	4.36225e-10	1.45772e-07	192314;321544;327491;368235;386701;386707;393162;393872;394048;402986;406487;406593;406695;406778;406839;407679;436824;436933;445058;445395;449820;492631;492655;492768;541386;553405;553516;562867;563218;565232;565592;569270;768137;768152;797342;797938;100536808	pole;abraxas1;dtl;nsmce1;cdc45;ube2t;mus81;fen1;nhej1;hspa14;helb;h2afx;exo1;dclre1b;cry-dash;chek1;cenps;yars;tdp2b;topbp1;tipin;rmi2;rad51;rad1;esco2;cdc7;xpc;sesn1;prpf19;si:ch211-66k16.27;paxx;pds5b;tonsl;rpa1;hbegfa;mavs;tubb5
GO:0000075	cell cycle checkpoint	http://amigo.geneontology.org/amigo/term/GO:0000075	53	10	0.767435	13.0304	3.4121e-09	1.0525e-06	192314;393162;393872;403012;406839;407679;445058;445386;449820;768137	abraxas1;dtl;bub3;mus81;ndc80;dclre1b;chek1;topbp1;tipin;rad1
GO:1903047	mitotic cell cycle process	http://amigo.geneontology.org/amigo/term/GO:1903047	203	17	2.93942	5.78345	5.11633e-09	1.36937e-06	192314;393162;403012;406487;406695;406747;406839;407679;445058;445386;492707;563517;563708;565592;567359;570062;768137	dtl;cdc45;bub3;ncapg;sass6;mus81;ncaph;ndc80;dclre1b;chek1;tubgcp3;topbp1;tipin;skp2;rad51;cenph;pds5b
GO:0007059	chromosome segregation	http://amigo.geneontology.org/amigo/term/GO:0007059	109	13	1.57831	8.23666	5.12234e-09	1.36937e-06	368856;386707;403012;406839;436865;445386;445395;492707;563218;565592;567359;569270;570062	bub3;ncapg;mus81;ncaph;ndc80;fen1;cenps;cenpn;ska1;rmi2;esco2;cenph;pds5b
GO:0000724	double-strand break repair via homologous recombination	http://amigo.geneontology.org/amigo/term/GO:0000724	42	9	0.608156	14.7988	6.49723e-09	1.62837e-06	327491;406487;406695;406839;436824;492655;492768;563218;797342	nsmce1;cdc45;mus81;helb;rmi2;rad51;cdc7;tonsl;rpa1
GO:0000725	recombinational repair	http://amigo.geneontology.org/amigo/term/GO:0000725	43	9	0.622636	14.4547	8.11661e-09	1.91456e-06	327491;406487;406695;406839;436824;492655;492768;563218;797342	nsmce1;cdc45;mus81;helb;rmi2;rad51;cdc7;tonsl;rpa1
GO:0006310	DNA recombination	http://amigo.geneontology.org/amigo/term/GO:0006310	94	12	1.36111	8.81633	9.33536e-09	2.07971e-06	327491;394048;406487;406695;406778;406839;436824;492655;492768;563218;569270;797342	nsmce1;cdc45;mus81;helb;h2afx;exo1;cenps;rmi2;rad51;cdc7;tonsl;rpa1
GO:0090304	nucleic acid metabolic process	http://amigo.geneontology.org/amigo/term/GO:0090304	1967	58	28.482	2.03638	1.1383e-08	2.40242e-06	30733;58024;192314;321544;324256;324947;325064;327491;368235;386707;393237;393360;393565;393872;394048;402986;405815;406487;406593;406695;406778;406839;407653;436824;445035;445058;445395;445819;447833;447856;449820;492481;492631;492655;492768;494060;541386;553232;553315;553405;553516;553648;558540;560495;562037;562348;562867;563218;564388;565592;565952;569270;751656;768137;768152;796803;797342;10…	thoc7;supt16h;pole;abraxas1;dtl;imp3;nsmce1;cdc45;e2f8;ints11;ube2t;irf10;mus81;fen1;nhej1;orc6;helb;hat1;h2afx;exo1;eprs;dclre1b;cry-dash;crcp;cenps;yars;znf296;stn1;tdp2b;utp3;tipin;thoc5;rrm2;rp9;rmi2;rad51;rad1;pus1;esco2;cdc7;coil;xpc;tut1;wdr18;si:ch211-195d17.2;srek1ip1;prpf19;mybl1;paxx;pds5b;sap130a;tonsl;prim2;sephs1;rpa1;mavs;srsf1b;polr2k
GO:0007093	mitotic cell cycle checkpoint	http://amigo.geneontology.org/amigo/term/GO:0007093	37	8	0.535757	14.9322	4.32155e-08	8.6647e-06	192314;393162;403012;406839;407679;445058;445386;768137	dtl;bub3;mus81;ndc80;dclre1b;chek1;topbp1;tipin
GO:0006996	organelle organization	http://amigo.geneontology.org/amigo/term/GO:0006996	1371	45	19.852	2.26678	4.8578e-08	9.27608e-06	30172;58024;326076;326761;327491;336391;360145;360146;368856;386701;386707;386897;393245;393360;393638;394048;402823;403012;406487;406695;406747;406839;436865;445386;445395;445819;447833;447914;449820;492707;550606;561871;562348;563218;563517;565592;567359;569270;569277;570062;768137;792029;796761;797342;799570	mxc;atpaf1;supt16h;abraxas1;bxdc2;cdc45;bub3;ncapg;kdm6a;mxd;sass6;lnpa;mus81;ncaph;ndc80;fen1;nup93;pagr1;helb;hat1;h2afx;dclre1b;cenps;cenpn;asf1bb;asf1ba;stn1;tubgcp3;ska1;rmi2;rad51;esco2;cenph;coil;wdr18;timm50;pds5b;tmed3;si:dkey-92f12.2;rpa1;nasp;tubb5;brd9;cox17;suz12b
GO:0044770	cell cycle phase transition	http://amigo.geneontology.org/amigo/term/GO:0044770	72	10	1.04255	9.59184	7.42143e-08	1.35272e-05	192314;326076;393162;403012;406695;407679;445058;445386;449820;563708	abraxas1;dtl;cdc45;bub3;ndc80;pagr1;chek1;topbp1;tipin;skp2
GO:0045786	negative regulation of cell cycle	http://amigo.geneontology.org/amigo/term/GO:0045786	98	11	1.41903	7.75177	1.53576e-07	2.67756e-05	192314;393162;393872;403012;406839;407679;445058;445386;449820;565952;768137	abraxas1;dtl;e2f8;bub3;mus81;ndc80;dclre1b;chek1;topbp1;tipin;rad1
GO:0051726	regulation of cell cycle	http://amigo.geneontology.org/amigo/term/GO:0051726	257	17	3.72134	4.56825	1.6819e-07	2.81018e-05	192314;326076;386707;393162;393872;403012;406695;406839;407679;445058;445386;449820;560495;563218;563708;565952;768137	abraxas1;dtl;cdc45;e2f8;bub3;mus81;ndc80;fen1;pagr1;dclre1b;chek1;topbp1;tipin;skp2;rmi2;rad1;si:ch211-195d17.2
GO:0031570	DNA integrity checkpoint	http://amigo.geneontology.org/amigo/term/GO:0031570	32	7	0.463357	15.1071	2.8751e-07	4.61166e-05	192314;393162;393872;406839;407679;445058;449820	abraxas1;dtl;mus81;chek1;topbp1;tipin;rad1
GO:0010564	regulation of cell cycle process	http://amigo.geneontology.org/amigo/term/GO:0010564	109	11	1.57831	6.96948	4.59053e-07	7.08002e-05	192314;326076;386707;393162;403012;406695;407679;445386;449820;563218;565952	abraxas1;dtl;cdc45;e2f8;bub3;ndc80;fen1;pagr1;chek1;topbp1;rmi2
GO:1901987	regulation of cell cycle phase transition	http://amigo.geneontology.org/amigo/term/GO:1901987	51	8	0.738475	10.8331	6.00648e-07	8.92073e-05	192314;326076;393162;403012;406695;407679;445386;449820	abraxas1;dtl;cdc45;bub3;ndc80;pagr1;chek1;topbp1
GO:0098813	nuclear chromosome segregation	http://amigo.geneontology.org/amigo/term/GO:0098813	92	10	1.33215	7.50665	7.79771e-07	0.000111674	386707;403012;406839;445386;445395;492707;563218;565592;569270;570062	bub3;ncapg;mus81;ncaph;ndc80;fen1;cenps;rmi2;esco2;pds5b
GO:0048285	organelle fission	http://amigo.geneontology.org/amigo/term/GO:0048285	141	12	2.04167	5.87755	8.70359e-07	0.00012035	360145;360146;403012;406487;406747;406839;445386;492707;563517;565592;569270;570062	mxc;bub3;ncapg;mxd;sass6;mus81;ncaph;ndc80;cenps;tubgcp3;rad51;pds5b
GO:0010948	negative regulation of cell cycle process	http://amigo.geneontology.org/amigo/term/GO:0010948	38	7	0.550236	12.7218	1.00246e-06	0.000133996	192314;393162;403012;407679;445386;449820;565952	abraxas1;dtl;e2f8;bub3;ndc80;chek1;topbp1
GO:0045005	DNA-dependent DNA replication maintenance of fidelity	http://amigo.geneontology.org/amigo/term/GO:0045005	14	5	0.202719	24.6647	1.07169e-06	0.000138628	406487;445058;492655;553405;569270	pole;cenps;tipin;rad51;tonsl
GO:0009263	deoxyribonucleotide biosynthetic process	http://amigo.geneontology.org/amigo/term/GO:0009263	7	4	0.101359	39.4636	1.42808e-06	0.000178957	30733;81540;554129;567734	dtymk;tyms;rrm2;hddc2
GO:0000077	DNA damage checkpoint	http://amigo.geneontology.org/amigo/term/GO:0000077	28	6	0.405437	14.7988	2.41051e-06	0.000281673	192314;393162;393872;406839;445058;449820	abraxas1;dtl;mus81;chek1;tipin;rad1
GO:1901988	negative regulation of cell cycle phase transition	http://amigo.geneontology.org/amigo/term/GO:1901988	28	6	0.405437	14.7988	2.41051e-06	0.000281673	192314;393162;403012;407679;445386;449820	abraxas1;dtl;bub3;ndc80;chek1;topbp1
GO:0045930	negative regulation of mitotic cell cycle	http://amigo.geneontology.org/amigo/term/GO:0045930	61	8	0.883274	9.05721	2.45849e-06	0.000281673	192314;393162;403012;406839;407679;445058;445386;768137	dtl;bub3;mus81;ndc80;dclre1b;chek1;topbp1;tipin
GO:0044774	mitotic DNA integrity checkpoint	http://amigo.geneontology.org/amigo/term/GO:0044774	18	5	0.260638	19.1837	4.37684e-06	0.000487531	192314;393162;406839;407679;445058	dtl;mus81;chek1;topbp1;tipin
GO:0000819	sister chromatid segregation	http://amigo.geneontology.org/amigo/term/GO:0000819	68	8	0.984634	8.12485	5.66597e-06	0.000614069	386707;403012;445386;445395;492707;563218;565592;570062	bub3;ncapg;ncaph;ndc80;fen1;rmi2;esco2;pds5b
GO:0044786	cell cycle DNA replication	http://amigo.geneontology.org/amigo/term/GO:0044786	10	4	0.144799	27.6245	8.28243e-06	0.000874014	406487;406695;445819;565952	cdc45;e2f8;rad51;wdr18
GO:2001020	regulation of response to DNA damage stimulus	http://amigo.geneontology.org/amigo/term/GO:2001020	35	6	0.506797	11.8391	9.5534e-06	0.00097181	321544;407679;436824;449820;563218;797342	abraxas1;nsmce1;helb;topbp1;rmi2;prpf19
GO:0051052	regulation of DNA metabolic process	http://amigo.geneontology.org/amigo/term/GO:0051052	73	8	1.05703	7.56835	9.69386e-06	0.00097181	393360;445058;445395;445819;449820;563218;565952;797342	abraxas1;e2f8;helb;stn1;tipin;rmi2;esco2;wdr18
GO:0000280	nuclear division	http://amigo.geneontology.org/amigo/term/GO:0000280	122	10	1.76655	5.66076	1.02969e-05	0.00100709	403012;406487;406747;406839;445386;492707;563517;565592;569270;570062	bub3;ncapg;sass6;mus81;ncaph;ndc80;cenps;tubgcp3;rad51;pds5b
GO:0009262	deoxyribonucleotide metabolic process	http://amigo.geneontology.org/amigo/term/GO:0009262	11	4	0.159279	25.1132	1.28689e-05	0.00122867	30733;81540;554129;567734	dtymk;tyms;rrm2;hddc2
GO:0044839	cell cycle G2/M phase transition	http://amigo.geneontology.org/amigo/term/GO:0044839	23	5	0.333038	15.0133	1.62136e-05	0.00147765	192314;393162;407679;449820;563708	abraxas1;dtl;chek1;topbp1;skp2
GO:0090068	positive regulation of cell cycle process	http://amigo.geneontology.org/amigo/term/GO:0090068	23	5	0.333038	15.0133	1.62136e-05	0.00147765	326076;386707;406695;445386;565952	cdc45;e2f8;ndc80;fen1;pagr1
GO:1901991	negative regulation of mitotic cell cycle phase transition	http://amigo.geneontology.org/amigo/term/GO:1901991	25	5	0.361998	13.8122	2.50097e-05	0.00222864	192314;393162;403012;407679;445386	dtl;bub3;ndc80;chek1;topbp1
GO:0009221	pyrimidine deoxyribonucleotide biosynthetic process	http://amigo.geneontology.org/amigo/term/GO:0009221	5	3	0.0723995	41.4367	2.91221e-05	0.00238325	81540;554129;567734	dtymk;tyms;hddc2
GO:0009265	2'-deoxyribonucleotide biosynthetic process	http://amigo.geneontology.org/amigo/term/GO:0009265	5	3	0.0723995	41.4367	2.91221e-05	0.00238325	81540;554129;567734	dtymk;tyms;hddc2
GO:0046385	deoxyribose phosphate biosynthetic process	http://amigo.geneontology.org/amigo/term/GO:0046385	5	3	0.0723995	41.4367	2.91221e-05	0.00238325	81540;554129;567734	dtymk;tyms;hddc2
GO:0000727	double-strand break repair via break-induced replication	http://amigo.geneontology.org/amigo/term/GO:0000727	5	3	0.0723995	41.4367	2.91221e-05	0.00238325	406695;406839;492768	cdc45;mus81;cdc7
GO:0044773	mitotic DNA damage checkpoint	http://amigo.geneontology.org/amigo/term/GO:0044773	14	4	0.202719	19.7318	3.77343e-05	0.0029099	192314;393162;406839;445058	dtl;mus81;chek1;tipin
GO:1902750	negative regulation of cell cycle G2/M phase transition	http://amigo.geneontology.org/amigo/term/GO:1902750	14	4	0.202719	19.7318	3.77343e-05	0.0029099	192314;393162;407679;449820	abraxas1;dtl;chek1;topbp1
GO:0034508	centromere complex assembly	http://amigo.geneontology.org/amigo/term/GO:0034508	14	4	0.202719	19.7318	3.77343e-05	0.0029099	368856;567359;569270;799570	cenps;cenpn;cenph;nasp
GO:0044772	mitotic cell cycle phase transition	http://amigo.geneontology.org/amigo/term/GO:0044772	66	7	0.955674	7.32468	4.41034e-05	0.00333688	192314;393162;403012;406695;407679;445386;563708	dtl;cdc45;bub3;ndc80;chek1;topbp1;skp2
GO:1901990	regulation of mitotic cell cycle phase transition	http://amigo.geneontology.org/amigo/term/GO:1901990	46	6	0.666076	9.00799	4.83601e-05	0.00359118	192314;393162;403012;406695;407679;445386	dtl;cdc45;bub3;ndc80;chek1;topbp1
GO:0051321	meiotic cell cycle	http://amigo.geneontology.org/amigo/term/GO:0051321	68	7	0.984634	7.10924	5.3592e-05	0.00390734	327491;394048;406487;406778;406839;563517;569270	mus81;h2afx;exo1;cenps;tubgcp3;rad51;rpa1
GO:0009219	pyrimidine deoxyribonucleotide metabolic process	http://amigo.geneontology.org/amigo/term/GO:0009219	6	3	0.0868794	34.5306	5.76251e-05	0.00412637	81540;554129;567734	dtymk;tyms;hddc2
GO:0071824	protein-DNA complex subunit organization	http://amigo.geneontology.org/amigo/term/GO:0071824	95	8	1.37559	5.81568	6.70516e-05	0.00455891	368856;406487;406695;445819;562348;567359;569270;799570	supt16h;cdc45;cenps;cenpn;rad51;cenph;wdr18;nasp
GO:0006406	mRNA export from nucleus	http://amigo.geneontology.org/amigo/term/GO:0006406	16	4	0.231678	17.2653	6.70762e-05	0.00455891	30172;323865;325064;445035	thoc7;nup93;nxf1;thoc5
GO:0071427	mRNA-containing ribonucleoprotein complex export from nucleus	http://amigo.geneontology.org/amigo/term/GO:0071427	16	4	0.231678	17.2653	6.70762e-05	0.00455891	30172;323865;325064;445035	thoc7;nup93;nxf1;thoc5
GO:0034622	cellular protein-containing complex assembly	http://amigo.geneontology.org/amigo/term/GO:0034622	406	17	5.87884	2.89173	7.74906e-05	0.00517895	30172;58024;321544;360145;360146;368856;394181;402823;406487;406695;445819;447914;550606;563517;567359;569270;799570	mxc;atpaf1;cox15;bxdc2;cdc45;mxd;nup93;cenps;cenpn;tubgcp3;rad51;cenph;coil;wdr18;prpf19;nasp;cox17
GO:2001021	negative regulation of response to DNA damage stimulus	http://amigo.geneontology.org/amigo/term/GO:2001021	7	3	0.101359	29.5977	9.97729e-05	0.00645305	321544;563218;797342	helb;rmi2;prpf19
GO:0051382	kinetochore assembly	http://amigo.geneontology.org/amigo/term/GO:0051382	7	3	0.101359	29.5977	9.97729e-05	0.00645305	368856;567359;569270	cenps;cenpn;cenph
GO:0007346	regulation of mitotic cell cycle	http://amigo.geneontology.org/amigo/term/GO:0007346	129	9	1.86791	4.81822	0.000102634	0.00653276	192314;393162;403012;406695;406839;407679;445058;445386;768137	dtl;cdc45;bub3;mus81;ndc80;dclre1b;chek1;topbp1;tipin
GO:0006270	DNA replication initiation	http://amigo.geneontology.org/amigo/term/GO:0006270	18	4	0.260638	15.3469	0.000110261	0.00690852	324256;406695;445819;492768	cdc45;orc6;cdc7;wdr18
GO:0000086	G2/M transition of mitotic cell cycle	http://amigo.geneontology.org/amigo/term/GO:0000086	19	4	0.275118	14.5392	0.000138098	0.00839049	192314;393162;407679;563708	dtl;chek1;topbp1;skp2
GO:1902749	regulation of cell cycle G2/M phase transition	http://amigo.geneontology.org/amigo/term/GO:1902749	19	4	0.275118	14.5392	0.000138098	0.00839049	192314;393162;407679;449820	abraxas1;dtl;chek1;topbp1
GO:0033260	nuclear DNA replication	http://amigo.geneontology.org/amigo/term/GO:0033260	8	3	0.115839	25.898	0.000157942	0.00931395	406487;406695;445819	cdc45;rad51;wdr18
GO:0051383	kinetochore organization	http://amigo.geneontology.org/amigo/term/GO:0051383	8	3	0.115839	25.898	0.000157942	0.00931395	368856;567359;569270	cenps;cenpn;cenph
GO:0065004	protein-DNA complex assembly	http://amigo.geneontology.org/amigo/term/GO:0065004	81	7	1.17287	5.96825	0.000164358	0.00955184	368856;406487;406695;445819;567359;569270;799570	cdc45;cenps;cenpn;rad51;cenph;wdr18;nasp
GO:0022616	DNA strand elongation	http://amigo.geneontology.org/amigo/term/GO:0022616	9	3	0.130319	23.0204	0.0002344	0.012702	386707;553405;768137	pole;fen1;dclre1b
GO:0009394	2'-deoxyribonucleotide metabolic process	http://amigo.geneontology.org/amigo/term/GO:0009394	9	3	0.130319	23.0204	0.0002344	0.012702	81540;554129;567734	dtymk;tyms;hddc2
GO:0019692	deoxyribose phosphate metabolic process	http://amigo.geneontology.org/amigo/term/GO:0019692	9	3	0.130319	23.0204	0.0002344	0.012702	81540;554129;567734	dtymk;tyms;hddc2
GO:0031572	G2 DNA damage checkpoint	http://amigo.geneontology.org/amigo/term/GO:0031572	9	3	0.130319	23.0204	0.0002344	0.012702	192314;393162;449820	abraxas1;dtl;chek1
GO:0044818	mitotic G2/M transition checkpoint	http://amigo.geneontology.org/amigo/term/GO:0044818	9	3	0.130319	23.0204	0.0002344	0.012702	192314;393162;407679	dtl;chek1;topbp1
GO:0006275	regulation of DNA replication	http://amigo.geneontology.org/amigo/term/GO:0006275	22	4	0.318558	12.5566	0.000251966	0.0134718	445058;445395;445819;565952	e2f8;tipin;esco2;wdr18
GO:0045787	positive regulation of cell cycle	http://amigo.geneontology.org/amigo/term/GO:0045787	41	5	0.593676	8.4221	0.000292799	0.015449	326076;386707;406695;445386;565952	cdc45;e2f8;ndc80;fen1;pagr1
GO:0031297	replication fork processing	http://amigo.geneontology.org/amigo/term/GO:0031297	10	3	0.144799	20.7184	0.000331308	0.0172538	406487;492655;569270	cenps;rad51;tonsl
GO:0033045	regulation of sister chromatid segregation	http://amigo.geneontology.org/amigo/term/GO:0033045	24	4	0.347518	11.5102	0.00035787	0.0183692	386707;403012;445386;563218	bub3;ndc80;fen1;rmi2
GO:0090305	nucleic acid phosphodiester bond hydrolysis	http://amigo.geneontology.org/amigo/term/GO:0090305	121	8	1.75207	4.56603	0.000361886	0.0183692	386707;393872;406778;406839;553405;553516;564388;768137	pole;mus81;fen1;exo1;dclre1b;tdp2b;rad1;tut1
GO:0009070	serine family amino acid biosynthetic process	http://amigo.geneontology.org/amigo/term/GO:0009070	11	3	0.159279	18.8349	0.000450723	0.0220414	324947;327512;431723	psat1;sephs1;tha1
GO:0010972	negative regulation of G2/M transition of mitotic cell cycle	http://amigo.geneontology.org/amigo/term/GO:0010972	11	3	0.159279	18.8349	0.000450723	0.0220414	192314;393162;407679	dtl;chek1;topbp1
GO:0090329	regulation of DNA-dependent DNA replication	http://amigo.geneontology.org/amigo/term/GO:0090329	11	3	0.159279	18.8349	0.000450723	0.0220414	445058;445819;565952	e2f8;tipin;wdr18
GO:0033044	regulation of chromosome organization	http://amigo.geneontology.org/amigo/term/GO:0033044	71	6	1.02807	5.83616	0.000549584	0.0265522	386707;393360;403012;406695;445386;563218	cdc45;bub3;ndc80;fen1;stn1;rmi2
GO:0071166	ribonucleoprotein complex localization	http://amigo.geneontology.org/amigo/term/GO:0071166	27	4	0.390957	10.2313	0.000571463	0.0269596	30172;323865;325064;445035	thoc7;nup93;nxf1;thoc5
GO:0071426	ribonucleoprotein complex export from nucleus	http://amigo.geneontology.org/amigo/term/GO:0071426	27	4	0.390957	10.2313	0.000571463	0.0269596	30172;323865;325064;445035	thoc7;nup93;nxf1;thoc5
GO:0022414	reproductive process	http://amigo.geneontology.org/amigo/term/GO:0022414	164	9	2.3747	3.78995	0.000617596	0.0287972	327491;394048;406487;406747;406778;406839;563517;569270;569277	kdm6a;sass6;mus81;h2afx;exo1;cenps;tubgcp3;rad51;rpa1
GO:0006221	pyrimidine nucleotide biosynthetic process	http://amigo.geneontology.org/amigo/term/GO:0006221	28	4	0.405437	9.86589	0.000659261	0.0300413	64674;81540;554129;567734	mibp;dtymk;tyms;hddc2
GO:0051983	regulation of chromosome segregation	http://amigo.geneontology.org/amigo/term/GO:0051983	28	4	0.405437	9.86589	0.000659261	0.0300413	386707;403012;445386;563218	bub3;ndc80;fen1;rmi2
GO:0000003	reproduction	http://amigo.geneontology.org/amigo/term/GO:0000003	167	9	2.41814	3.72186	0.00070377	0.0317092	327491;394048;406487;406747;406778;406839;563517;569270;569277	kdm6a;sass6;mus81;h2afx;exo1;cenps;tubgcp3;rad51;rpa1
GO:0080135	regulation of cellular response to stress	http://amigo.geneontology.org/amigo/term/GO:0080135	75	6	1.08599	5.5249	0.000736971	0.0322595	321544;407679;436824;449820;563218;797342	abraxas1;nsmce1;helb;topbp1;rmi2;prpf19
GO:0006325	chromatin organization	http://amigo.geneontology.org/amigo/term/GO:0006325	280	12	4.05437	2.95977	0.000747497	0.0322595	326076;386897;393245;394048;406695;447833;449820;561871;562348;569277;792029;799570	supt16h;abraxas1;cdc45;kdm6a;pagr1;hat1;h2afx;asf1bb;asf1ba;nasp;brd9;suz12b
GO:0006220	pyrimidine nucleotide metabolic process	http://amigo.geneontology.org/amigo/term/GO:0006220	29	4	0.419917	9.52569	0.000756207	0.0322595	64674;81540;554129;567734	mibp;dtymk;tyms;hddc2
GO:0072528	pyrimidine-containing compound biosynthetic process	http://amigo.geneontology.org/amigo/term/GO:0072528	29	4	0.419917	9.52569	0.000756207	0.0322595	64674;81540;554129;567734	mibp;dtymk;tyms;hddc2
GO:0051304	chromosome separation	http://amigo.geneontology.org/amigo/term/GO:0051304	29	4	0.419917	9.52569	0.000756207	0.0322595	403012;406839;445386;569270	bub3;mus81;ndc80;cenps
GO:0071897	DNA biosynthetic process	http://amigo.geneontology.org/amigo/term/GO:0071897	30	4	0.434397	9.20816	0.00086281	0.0364197	192314;327491;393360;553405	pole;dtl;stn1;rpa1
GO:0000070	mitotic sister chromatid segregation	http://amigo.geneontology.org/amigo/term/GO:0000070	52	5	0.752955	6.6405	0.000893812	0.0373353	403012;445386;492707;565592;570062	bub3;ncapg;ncaph;ndc80;pds5b
GO:0042770	signal transduction in response to DNA damage	http://amigo.geneontology.org/amigo/term/GO:0042770	14	3	0.202719	14.7988	0.000963096	0.0398146	192314;321544;449820	abraxas1;dtl;prpf19
GO:0051053	negative regulation of DNA metabolic process	http://amigo.geneontology.org/amigo/term/GO:0051053	31	4	0.448877	8.91113	0.000979586	0.0400831	393360;445058;563218;797342	helb;stn1;tipin;rmi2
GO:0006405	RNA export from nucleus	http://amigo.geneontology.org/amigo/term/GO:0006405	32	4	0.463357	8.63265	0.00110705	0.044841	30172;323865;325064;445035	thoc7;nup93;nxf1;thoc5
GO:0010389	regulation of G2/M transition of mitotic cell cycle	http://amigo.geneontology.org/amigo/term/GO:0010389	15	3	0.217199	13.8122	0.00119115	0.045928	192314;393162;407679	dtl;chek1;topbp1
GO:0009129	pyrimidine nucleoside monophosphate metabolic process	http://amigo.geneontology.org/amigo/term/GO:0009129	15	3	0.217199	13.8122	0.00119115	0.045928	64674;81540;554129	mibp;tyms;hddc2
GO:0009130	pyrimidine nucleoside monophosphate biosynthetic process	http://amigo.geneontology.org/amigo/term/GO:0009130	15	3	0.217199	13.8122	0.00119115	0.045928	64674;81540;554129	mibp;tyms;hddc2
GO:0007131	reciprocal meiotic recombination	http://amigo.geneontology.org/amigo/term/GO:0007131	15	3	0.217199	13.8122	0.00119115	0.045928	406487;406839;569270	mus81;cenps;rad51
GO:0035825	homologous recombination	http://amigo.geneontology.org/amigo/term/GO:0035825	15	3	0.217199	13.8122	0.00119115	0.045928	406487;406839;569270	mus81;cenps;rad51
GO:0006611	protein export from nucleus	http://amigo.geneontology.org/amigo/term/GO:0006611	33	4	0.477837	8.37106	0.0012457	0.0471252	30172;323865;325064;445035	thoc7;nup93;nxf1;thoc5
GO:0051028	mRNA transport	http://amigo.geneontology.org/amigo/term/GO:0051028	33	4	0.477837	8.37106	0.0012457	0.0471252	30172;323865;325064;445035	thoc7;nup93;nxf1;thoc5
geneSet	description	link	size	overlap	expect	enrichmentRatio	pValue	FDR	overlapId	userId
GO:0006259	DNA metabolic process	http://amigo.geneontology.org/amigo/term/GO:0006259	293	33	4.93643	6.68499	0	0	30733;192314;321544;324256;327491;386707;393360;394048;402986;406487;406593;406695;406778;406839;407653;436824;445058;445395;445819;449820;492631;492655;492768;541386;553405;553516;563218;565592;565952;569270;768137;768152;797342	pole;abraxas1;dtl;nsmce1;cdc45;e2f8;ube2t;mus81;fen1;nhej1;orc6;helb;h2afx;exo1;dclre1b;cry-dash;cenps;stn1;tdp2b;tipin;rrm2;rmi2;rad51;esco2;cdc7;xpc;wdr18;prpf19;paxx;pds5b;tonsl;prim2;rpa1
GO:0033554	cellular response to stress	http://amigo.geneontology.org/amigo/term/GO:0033554	438	32	7.37938	4.33641	8.38996e-13	1.19137e-10	192314;321544;327491;368235;386707;393162;393872;394048;402986;406487;406593;406695;406778;406839;407679;436824;436933;445058;449820;492631;492655;492768;541386;553405;553516;563218;565232;565592;569270;768137;768152;797342	pole;abraxas1;dtl;nsmce1;cdc45;ube2t;mus81;fen1;nhej1;hspa14;helb;h2afx;exo1;dclre1b;cry-dash;chek1;cenps;yars;tdp2b;topbp1;tipin;rmi2;rad51;rad1;cdc7;xpc;sesn1;prpf19;paxx;pds5b;tonsl;rpa1
GO:0022402	cell cycle process	http://amigo.geneontology.org/amigo/term/GO:0022402	302	26	5.08806	5.11	4.07296e-12	3.85574e-10	192314;326076;386707;393162;403012;406487;406695;406747;406778;406839;407679;445058;445386;445395;445819;449820;492707;563218;563517;563708;565592;565952;567359;569270;570062;768137	abraxas1;dtl;cdc45;e2f8;bub3;ncapg;sass6;mus81;ncaph;ndc80;fen1;pagr1;exo1;dclre1b;chek1;cenps;tubgcp3;topbp1;tipin;skp2;rmi2;rad51;esco2;cenph;wdr18;pds5b
GO:0000278	mitotic cell cycle	http://amigo.geneontology.org/amigo/term/GO:0000278	276	23	4.65002	4.94622	1.59358e-10	9.56483e-09	192314;386701;393162;403012;406487;406695;406747;406839;407679;436865;445058;445386;445395;492707;553405;558540;563517;563708;565592;565952;567359;570062;768137	pole;dtl;cdc45;e2f8;bub3;ncapg;sass6;mus81;ncaph;ndc80;dclre1b;chek1;tubgcp3;topbp1;tipin;skp2;ska1;rad51;esco2;cenph;mybl1;pds5b;tubb5
GO:0051276	chromosome organization	http://amigo.geneontology.org/amigo/term/GO:0051276	413	28	6.95818	4.02404	1.68395e-10	9.56483e-09	326076;327491;368856;386707;386897;393245;393360;394048;403012;406487;406695;445386;445395;447833;449820;492707;561871;562348;563218;565592;567359;569270;569277;570062;768137;792029;797342;799570	supt16h;abraxas1;cdc45;bub3;ncapg;kdm6a;ncaph;ndc80;fen1;pagr1;helb;hat1;h2afx;dclre1b;cenps;cenpn;asf1bb;asf1ba;stn1;rmi2;rad51;esco2;cenph;pds5b;rpa1;nasp;brd9;suz12b
GO:0007059	chromosome segregation	http://amigo.geneontology.org/amigo/term/GO:0007059	109	13	1.83642	7.07899	2.96555e-08	1.40369e-06	368856;386707;403012;406839;436865;445386;445395;492707;563218;565592;567359;569270;570062	bub3;ncapg;mus81;ncaph;ndc80;fen1;cenps;cenpn;ska1;rmi2;esco2;cenph;pds5b
GO:0051726	regulation of cell cycle	http://amigo.geneontology.org/amigo/term/GO:0051726	257	17	4.32991	3.92618	1.32396e-06	5.3715e-05	192314;326076;386707;393162;393872;403012;406695;406839;407679;445058;445386;449820;560495;563218;563708;565952;768137	abraxas1;dtl;cdc45;e2f8;bub3;mus81;ndc80;fen1;pagr1;dclre1b;chek1;topbp1;tipin;skp2;rmi2;rad1;si:ch211-195d17.2
GO:0048285	organelle fission	http://amigo.geneontology.org/amigo/term/GO:0048285	141	12	2.37555	5.05146	4.0672e-06	0.000144385	360145;360146;403012;406487;406747;406839;445386;492707;563517;565592;569270;570062	mxc;bub3;ncapg;mxd;sass6;mus81;ncaph;ndc80;cenps;tubgcp3;rad51;pds5b
GO:0071824	protein-DNA complex subunit organization	http://amigo.geneontology.org/amigo/term/GO:0071824	95	8	1.60055	4.99828	0.000188243	0.00594012	368856;406487;406695;445819;562348;567359;569270;799570	supt16h;cdc45;cenps;cenpn;rad51;cenph;wdr18;nasp
GO:0034622	cellular protein-containing complex assembly	http://amigo.geneontology.org/amigo/term/GO:0034622	406	17	6.84024	2.48529	0.000452468	0.0128501	30172;58024;321544;360145;360146;368856;394181;402823;406487;406695;445819;447914;550606;563517;567359;569270;799570	mxc;atpaf1;cox15;bxdc2;cdc45;mxd;nup93;cenps;cenpn;tubgcp3;rad51;cenph;coil;wdr18;prpf19;nasp;cox17
GO:0090305	nucleic acid phosphodiester bond hydrolysis	http://amigo.geneontology.org/amigo/term/GO:0090305	121	8	2.03859	3.92427	0.000965771	0.0237254	386707;393872;406778;406839;553405;553516;564388;768137	pole;mus81;fen1;exo1;dclre1b;tdp2b;rad1;tut1
GO:0071166	ribonucleoprotein complex localization	http://amigo.geneontology.org/amigo/term/GO:0071166	27	4	0.454893	8.79328	0.00100248	0.0237254	30172;323865;325064;445035	thoc7;nup93;nxf1;thoc5
GO:0000003	reproduction	http://amigo.geneontology.org/amigo/term/GO:0000003	167	9	2.8136	3.19875	0.00199304	0.0435404	327491;394048;406487;406747;406778;406839;563517;569270;569277	kdm6a;sass6;mus81;h2afx;exo1;cenps;tubgcp3;rad51;rpa1
geneSet	description	link	size	overlap	expect	enrichmentRatio	pValue	FDR	overlapId	userId
dre03030	DNA replication	http://www.kegg.jp/kegg-bin/show_pathway?dre03030+100005387+192320+192333+259256+327491+386707+393195+393196+393241+406435+407653+503748+550504+553405+559535+796456	38	16	0.724603	22.081	0	0	100005387;192320;192333;259256;327491;386707;393195;393196;393241;406435;407653;503748;550504;553405;559535;796456	ssbp1;pole;pold2;fen1;dna2;rnaseh2b;rfc2;rnaseh2c;rfc3;pole2;mcm7;prim2;rfc4;rpa1;rnaseh2a;rpa3
dre03430	Mismatch repair	http://www.kegg.jp/kegg-bin/show_pathway?dre03430+259256+327491+393196+406435+406778+503748+550504+796456	22	8	0.419507	19.07	3.48921e-09	2.82626e-07	259256;327491;393196;406435;406778;503748;550504;796456	ssbp1;pold2;exo1;rfc2;rfc3;rfc4;rpa1;rpa3
dre03440	Homologous recombination	http://www.kegg.jp/kegg-bin/show_pathway?dre03440+327491+393196+394119+406487+406839+407679+449820+550504+796456	40	9	0.76274	11.7996	4.0342e-08	2.17847e-06	327491;393196;394119;406487;406839;407679;449820;550504;796456	ssbp1;abraxas1;pold2;mus81;topbp1;rad51;rad54l;rpa1;rpa3
dre03420	Nucleotide excision repair	http://www.kegg.jp/kegg-bin/show_pathway?dre03420+192320+259256+327491+393196+406435+503748+541386+553405+796456	44	9	0.839015	10.7269	9.81333e-08	3.9744e-06	192320;259256;327491;393196;406435;503748;541386;553405;796456	pole;pold2;rfc2;rfc3;pole2;xpc;rfc4;rpa1;rpa3
dre00240	Pyrimidine metabolism	http://www.kegg.jp/kegg-bin/show_pathway?dre00240+192320+30733+407653+449786+541538+553405+567734+796456+796803+81540	105	10	2.00219	4.99452	2.69203e-05	0.000872219	192320;30733;407653;449786;541538;553405;567734;796456;796803;81540	pole;pold2;dtymk;tyms;rrm2;polr3glb;pole2;zgc:110540;prim2;polr2k
dre03460	Fanconi anemia pathway	http://www.kegg.jp/kegg-bin/show_pathway?dre03460+327491+393196+406487+406839+563218+569270+768152	51	7	0.972494	7.19799	4.40572e-05	0.00118954	327491;393196;406487;406839;563218;569270;768152	ube2t;mus81;cenps;rmi2;rad51;rpa1;rpa3
dre04110	Cell cycle	http://www.kegg.jp/kegg-bin/show_pathway?dre04110+192333+324256+393162+402825+403012+406695+415165+492768+554509+563708+569473	139	11	2.65052	4.15012	5.99079e-05	0.00138644	192333;324256;393162;402825;403012;406695;415165;492768;554509;563708;569473	cdc45;bub3;orc1;orc6;chek1;cdc6;ccne2;skp2;cdc7;mcm7;anapc13
dre03410	Base excision repair	http://www.kegg.jp/kegg-bin/show_pathway?dre03410+192320+386707+492463+553405+796456	37	5	0.705535	7.08682	0.00061791	0.0125127	192320;386707;492463;553405;796456	pole;pold2;fen1;neil3;pole2
dre03013	RNA transport	http://www.kegg.jp/kegg-bin/show_pathway?dre03013+30172+323865+325064+393917+394049+415150+436950+445035+445382+751738	158	10	3.01282	3.31914	0.00080081	0.0144146	30172;323865;325064;393917;394049;415150;436950;445035;445382;751738	eif2b1;thoc7;nup93;nxf1;nxt2;eif2b3;ddx39b;thoc5;nup205;sumo3b
dre00970	Aminoacyl-tRNA biosynthesis	http://www.kegg.jp/kegg-bin/show_pathway?dre00970+334393+337230+338183+368235+562037+568332	64	6	1.22038	4.91648	0.00128325	0.0207886	334393;337230;338183;368235;562037;568332	nars;iars;eprs;yars;mars;gars

## Sheet: 工作表1
D2	BP Term	Enriched genes
	ROS metabolic process	hbba1, hbaa2, hbba2, romo1
D3	KEGG	Enriched genes
	Lysosome	ctsa, gm2a, psapg, m6pr
D5	BP Term	Enriched genes
	ribosome biogenesis	Ribosomal subunit encoded genes
	immune system development	Ribosomal subunit encoded genes, irf8
	myeloid cell homeostasis	Ribosomal subunit encoded genes, anxa1a
D6	BP Term	Enriched genes
	generation of precursor metabolites and energy	Cytochrome c oxidase, NADH ubiquinone Oxidoreductase
	vesicle-mediated transport	cog4, rab11fip4b, rab5aa, rab11a
	regulation of proteolysis	serpinb1l3;serpinb1l, rnf14
	KEGG	Enriched genes
	Herpes simplex infection	irf7, irf9, stat1b, jun, il1b
	NOD-like receptor signaling pathway	atg16l1, atg5
	C-type lectin receptor signaling pathway	stat1a, stat1b, irf9, irf1b, egr3, card9
	Oxidative phosphorylation	Cytochrome c oxidase, NADH ubiquinone Oxidoreductase
	Citrate cycle (TCA cycle)	isocitrate dehydrogenase, dihydrolipoamide dehydrogenase
D11	BP Term	Enriched genes
	angiogenesis	vegfaa, vegfbb, fn1a, elmo1
	cardiovascular system development	cdc42, elmo1, vegfbaa, vegfbb, fn1a, lrp1ab
	KEGG
	Tight junction	cdc42, itgb1b, tuba8l
D13	BP Term	Enriched genes
	autophagy	gabarapb, atg3, tp53inp1
	RNA splicing	prpf6, prpf4, mettl16
D14	KEGG	Enriched genes
	Necroptosis	caspa, jak2b, tnfrsf1a, fth1a, jak1, hmgb1a, cybb
	ErbB signaling pathway	pak2b, map2k2a, camk2g1, mtor, cdkn1bb
	Hedgehog signaling pathway	prkacba, prkacab, csnk1g2a, cul1b, spop
D16	BP Term	Enriched genes
	fatty acid oxidation	hadhaa, acat1, cpt2, acaa1, auh
	KEGG	Enriched genes
	Fatty acid degradation	aldh2.2, eci1, hadhaa, acat1, aldh16a1
D17	BP Term	Enriched genes
	mitotic cell cycle	cdc45, tubb5
	KEGG	Enriched genes
	DNA replication	ssbp1, pole, pold2
