# Supplementary material for: Comparative single-cell profiling reveals distinct cardiac resident macrophages essential for zebrafish heart regeneration
Source: eLife. 2023 Jul 27;12:e84679. doi: 10.7554/eLife.84679 (PMC10411971; doi:10.7554/eLife.84679)
Supplement: Figure 5—source data 1. [file elife-84679-fig5-data1.xlsx]

## Sheet: statistics
3dpci_Mac-ligand to Neu-receptor
Cluster pair ID	macrophage	pair type	neutrophil	PBS3d specific	CL3d specific	3d common	total
0	Mac 1	L->R	Neu 1	6	26	121	153
1	Mac 1	L->R	Neu 2	6	32	117	155
2	Mac 2	L->R	Neu 1	22	34	108	164
3	Mac 2	L->R	Neu 2	21	45	104	170
4	Mac 3	L->R	Neu 1	5	31	116	152
5	Mac 3	L->R	Neu 2	7	36	111	154
6	Mac 4	L->R	Neu 1	13	16	117	146
7	Mac 4	L->R	Neu 2	13	21	114	148
8	Mac 5	L->R	Neu 1	11	13	108	132
9	Mac 5	L->R	Neu 2	13	18	104	135
10	Mac 6	L->R	Neu 1	23	24	105	152
11	Mac 6	L->R	Neu 2	21	28	102	151
12	Mac 7	L->R	Neu 1	41	47	83	171
13	Mac 7	L->R	Neu 2	37	51	81	169
14	MN	L->R	Neu 1	17	23	103	143
15	MN	L->R	Neu 2	17	22	105	144
16	Mac 8	L->R	Neu 1	39	35	101	175
17	Mac 8	L->R	Neu 2	32	46	94	172
18	Mac 9	L->R	Neu 1	22	45	82	149
19	Mac 9	L->R	Neu 2	20	47	80	147
	total			386	640	2056	3082
	mean			19.3	32	102.8
	%			12.5243	20.7657	66.7099

## Sheet: PBS3d-specific
3dpci_Mac-ligand to Neu-receptor
Cluster pair ID	CT1	pair type	CT2	human L-R pair	L-R pair
0	Mac 1	L->R	Neu 1	ADM_RAMP2	adma_ramp2
0	Mac 1	L->R	Neu 1	ANGPTL4_TIE1	angptl4_tie1
0	Mac 1	L->R	Neu 1	LAMB1_ITGA1	lamb1b_itga1
0	Mac 1	L->R	Neu 1	VEGFA_ITGAV	vegfaa_itgav
0	Mac 1	L->R	Neu 1	VEGFA_ITGB1	vegfaa_CABZ01058721.1
0	Mac 1	L->R	Neu 1	VEGFA_ITGB1	vegfaa_itgb1b
1	Mac 1	L->R	Neu 2	ADM_RAMP2	adma_ramp2
1	Mac 1	L->R	Neu 2	ANGPTL4_TIE1	angptl4_tie1
1	Mac 1	L->R	Neu 2	LAMB1_ITGA1	lamb1b_itga1
1	Mac 1	L->R	Neu 2	UBA52_TGFBR1	uba52_tgfbr1b
1	Mac 1	L->R	Neu 2	VEGFA_ITGAV	vegfaa_itgav
1	Mac 1	L->R	Neu 2	VEGFA_ITGB1	vegfaa_itgb1b
2	Mac 2	L->R	Neu 1	ANGPTL4_TIE1	angptl4_tie1
2	Mac 2	L->R	Neu 1	APP_AGER	appb_si:ch211-79k12.1
2	Mac 2	L->R	Neu 1	APP_APLP2	appb_aplp2
2	Mac 2	L->R	Neu 1	APP_CD74	appb_cd74a
2	Mac 2	L->R	Neu 1	APP_CD74	appb_cd74b
2	Mac 2	L->R	Neu 1	APP_LRP10	appb_lrp10
2	Mac 2	L->R	Neu 1	APP_NOTCH2	appb_notch2
2	Mac 2	L->R	Neu 1	APP_RPSA	appb_rpsa
2	Mac 2	L->R	Neu 1	C3_CD81	c3a.4_cd81a
2	Mac 2	L->R	Neu 1	C3_ITGAX	c3a.4_si:dkey-32n7.4
2	Mac 2	L->R	Neu 1	C3_ITGAX	c3a.4_itgam
2	Mac 2	L->R	Neu 1	C3_ITGB2	c3a.4_itgb2
2	Mac 2	L->R	Neu 1	COL1A2_CD44	col1a2_cd44b
2	Mac 2	L->R	Neu 1	COL1A2_ITGA1	col1a2_itga1
2	Mac 2	L->R	Neu 1	COL1A2_ITGAV	col1a2_itgav
2	Mac 2	L->R	Neu 1	COL1A2_ITGB1	col1a2_CABZ01058721.1
2	Mac 2	L->R	Neu 1	COL1A2_ITGB1	col1a2_itgb1b
2	Mac 2	L->R	Neu 1	LIN7C_ABCA1	lin7c_abca1a
2	Mac 2	L->R	Neu 1	LIN7C_ABCA1	lin7c_abca1b
2	Mac 2	L->R	Neu 1	LPL_CD44	lpl_cd44b
2	Mac 2	L->R	Neu 1	PLTP_ABCA1	pltp_abca1a
2	Mac 2	L->R	Neu 1	PLTP_ABCA1	pltp_abca1b
3	Mac 2	L->R	Neu 2	ANGPTL4_TIE1	angptl4_tie1
3	Mac 2	L->R	Neu 2	APP_AGER	appb_si:ch211-79k12.1
3	Mac 2	L->R	Neu 2	APP_APLP2	appb_aplp2
3	Mac 2	L->R	Neu 2	APP_CD74	appb_cd74a
3	Mac 2	L->R	Neu 2	APP_CD74	appb_cd74b
3	Mac 2	L->R	Neu 2	APP_LRP10	appb_lrp10
3	Mac 2	L->R	Neu 2	APP_NOTCH2	appb_notch2
3	Mac 2	L->R	Neu 2	APP_RPSA	appb_rpsa
3	Mac 2	L->R	Neu 2	C3_CD81	c3a.4_cd81a
3	Mac 2	L->R	Neu 2	C3_ITGAX	c3a.4_si:dkey-32n7.4
3	Mac 2	L->R	Neu 2	C3_ITGB2	c3a.4_itgb2
3	Mac 2	L->R	Neu 2	COL1A2_CD44	col1a2_cd44b
3	Mac 2	L->R	Neu 2	COL1A2_ITGA1	col1a2_itga1
3	Mac 2	L->R	Neu 2	COL1A2_ITGAV	col1a2_itgav
3	Mac 2	L->R	Neu 2	COL1A2_ITGB1	col1a2_itgb1b
3	Mac 2	L->R	Neu 2	LIN7C_ABCA1	lin7c_abca1a
3	Mac 2	L->R	Neu 2	LIN7C_ABCA1	lin7c_abca1b
3	Mac 2	L->R	Neu 2	LPL_CD44	lpl_cd44b
3	Mac 2	L->R	Neu 2	PLTP_ABCA1	pltp_abca1a
3	Mac 2	L->R	Neu 2	PLTP_ABCA1	pltp_abca1b
3	Mac 2	L->R	Neu 2	UBA52_TGFBR1	uba52_tgfbr1b
4	Mac 3	L->R	Neu 1	AFDN_F11R	afdna_f11r.1
4	Mac 3	L->R	Neu 1	ICAM3_ITGB2	si:ch73-208g10.1_itgb2
4	Mac 3	L->R	Neu 1	MFGE8_ITGAV	mfge8b_itgav
4	Mac 3	L->R	Neu 1	PLTP_ABCA1	pltp_abca1a
4	Mac 3	L->R	Neu 1	PLTP_ABCA1	pltp_abca1b
5	Mac 3	L->R	Neu 2	AFDN_F11R	afdna_f11r.1
5	Mac 3	L->R	Neu 2	HGF_ST14	hgfb_zmp:0000001114
5	Mac 3	L->R	Neu 2	ICAM3_ITGB2	si:ch73-208g10.1_itgb2
5	Mac 3	L->R	Neu 2	MFGE8_ITGAV	mfge8b_itgav
5	Mac 3	L->R	Neu 2	PLTP_ABCA1	pltp_abca1a
5	Mac 3	L->R	Neu 2	PLTP_ABCA1	pltp_abca1b
5	Mac 3	L->R	Neu 2	UBA52_TGFBR1	uba52_tgfbr1b
6	Mac 4	L->R	Neu 1	APP_AGER	appb_si:ch211-79k12.1
6	Mac 4	L->R	Neu 1	APP_APLP2	appb_aplp2
6	Mac 4	L->R	Neu 1	APP_CD74	appb_cd74a
6	Mac 4	L->R	Neu 1	APP_CD74	appb_cd74b
6	Mac 4	L->R	Neu 1	APP_LRP10	appb_lrp10
6	Mac 4	L->R	Neu 1	APP_NOTCH2	appb_notch2
6	Mac 4	L->R	Neu 1	APP_RPSA	appb_rpsa
6	Mac 4	L->R	Neu 1	HGF_CD44	hgfb_cd44b
6	Mac 4	L->R	Neu 1	HGF_ITGB1	hgfb_CABZ01058721.1
6	Mac 4	L->R	Neu 1	HGF_ITGB1	hgfb_itgb1b
6	Mac 4	L->R	Neu 1	HGF_ST14	hgfb_zmp:0000001114
6	Mac 4	L->R	Neu 1	LAMB1_ITGA1	lamb1b_itga1
6	Mac 4	L->R	Neu 1	LPL_CD44	lpl_cd44b
7	Mac 4	L->R	Neu 2	APP_AGER	appb_si:ch211-79k12.1
7	Mac 4	L->R	Neu 2	APP_APLP2	appb_aplp2
7	Mac 4	L->R	Neu 2	APP_CD74	appb_cd74a
7	Mac 4	L->R	Neu 2	APP_CD74	appb_cd74b
7	Mac 4	L->R	Neu 2	APP_LRP10	appb_lrp10
7	Mac 4	L->R	Neu 2	APP_NOTCH2	appb_notch2
7	Mac 4	L->R	Neu 2	APP_RPSA	appb_rpsa
7	Mac 4	L->R	Neu 2	HGF_CD44	hgfb_cd44b
7	Mac 4	L->R	Neu 2	HGF_ITGB1	hgfb_itgb1b
7	Mac 4	L->R	Neu 2	HGF_ST14	hgfb_zmp:0000001114
7	Mac 4	L->R	Neu 2	LAMB1_ITGA1	lamb1b_itga1
7	Mac 4	L->R	Neu 2	LPL_CD44	lpl_cd44b
7	Mac 4	L->R	Neu 2	UBA52_TGFBR1	uba52_tgfbr1b
8	Mac 5	L->R	Neu 1	ANGPTL4_TIE1	angptl4_tie1
8	Mac 5	L->R	Neu 1	APP_AGER	appb_si:ch211-79k12.1
8	Mac 5	L->R	Neu 1	APP_APLP2	appb_aplp2
8	Mac 5	L->R	Neu 1	APP_CD74	appb_cd74a
8	Mac 5	L->R	Neu 1	APP_CD74	appb_cd74b
8	Mac 5	L->R	Neu 1	APP_LRP10	appb_lrp10
8	Mac 5	L->R	Neu 1	APP_NOTCH2	appb_notch2
8	Mac 5	L->R	Neu 1	APP_RPSA	appb_rpsa
8	Mac 5	L->R	Neu 1	LPL_CD44	lpl_cd44b
8	Mac 5	L->R	Neu 1	PLTP_ABCA1	pltp_abca1a
8	Mac 5	L->R	Neu 1	PLTP_ABCA1	pltp_abca1b
9	Mac 5	L->R	Neu 2	ANGPTL4_TIE1	angptl4_tie1
9	Mac 5	L->R	Neu 2	APP_AGER	appb_si:ch211-79k12.1
9	Mac 5	L->R	Neu 2	APP_APLP2	appb_aplp2
9	Mac 5	L->R	Neu 2	APP_CD74	appb_cd74a
9	Mac 5	L->R	Neu 2	APP_CD74	appb_cd74b
9	Mac 5	L->R	Neu 2	APP_LRP10	appb_lrp10
9	Mac 5	L->R	Neu 2	APP_NOTCH2	appb_notch2
9	Mac 5	L->R	Neu 2	APP_RPSA	appb_rpsa
9	Mac 5	L->R	Neu 2	CXCL9_CXCR3	BX323596.1_cxcr3.3
9	Mac 5	L->R	Neu 2	LPL_CD44	lpl_cd44b
9	Mac 5	L->R	Neu 2	PLTP_ABCA1	pltp_abca1a
9	Mac 5	L->R	Neu 2	PLTP_ABCA1	pltp_abca1b
9	Mac 5	L->R	Neu 2	UBA52_TGFBR1	uba52_tgfbr1b
10	Mac 6	L->R	Neu 1	ADM_RAMP2	adma_ramp2
10	Mac 6	L->R	Neu 1	ANGPTL4_TIE1	angptl4_tie1
10	Mac 6	L->R	Neu 1	APP_AGER	appb_si:ch211-79k12.1
10	Mac 6	L->R	Neu 1	APP_APLP2	appb_aplp2
10	Mac 6	L->R	Neu 1	APP_CD74	appb_cd74a
10	Mac 6	L->R	Neu 1	APP_CD74	appb_cd74b
10	Mac 6	L->R	Neu 1	APP_LRP10	appb_lrp10
10	Mac 6	L->R	Neu 1	APP_NOTCH2	appb_notch2
10	Mac 6	L->R	Neu 1	APP_RPSA	appb_rpsa
10	Mac 6	L->R	Neu 1	HSPG2_ITGB1	hspg2_CABZ01058721.1
10	Mac 6	L->R	Neu 1	HSPG2_ITGB1	hspg2_itgb1b
10	Mac 6	L->R	Neu 1	IL15_IL15RA	il15l_il15ra
10	Mac 6	L->R	Neu 1	IL15_IL2RB	il15l_csf2rb
10	Mac 6	L->R	Neu 1	IL15_IL2RB	il15l_il21r.1
10	Mac 6	L->R	Neu 1	LPL_CD44	lpl_cd44b
10	Mac 6	L->R	Neu 1	PLTP_ABCA1	pltp_abca1a
10	Mac 6	L->R	Neu 1	PLTP_ABCA1	pltp_abca1b
10	Mac 6	L->R	Neu 1	VEGFA_ITGAV	vegfab_itgav
10	Mac 6	L->R	Neu 1	VEGFA_ITGB1	vegfab_CABZ01058721.1
10	Mac 6	L->R	Neu 1	VEGFA_ITGB1	vegfab_itgb1b
10	Mac 6	L->R	Neu 1	VEGFA_ITGAV	vegfaa_itgav
10	Mac 6	L->R	Neu 1	VEGFA_ITGB1	vegfaa_CABZ01058721.1
10	Mac 6	L->R	Neu 1	VEGFA_ITGB1	vegfaa_itgb1b
11	Mac 6	L->R	Neu 2	ADM_RAMP2	adma_ramp2
11	Mac 6	L->R	Neu 2	ANGPTL4_TIE1	angptl4_tie1
11	Mac 6	L->R	Neu 2	APP_AGER	appb_si:ch211-79k12.1
11	Mac 6	L->R	Neu 2	APP_APLP2	appb_aplp2
11	Mac 6	L->R	Neu 2	APP_CD74	appb_cd74a
11	Mac 6	L->R	Neu 2	APP_CD74	appb_cd74b
11	Mac 6	L->R	Neu 2	APP_LRP10	appb_lrp10
11	Mac 6	L->R	Neu 2	APP_NOTCH2	appb_notch2
11	Mac 6	L->R	Neu 2	APP_RPSA	appb_rpsa
11	Mac 6	L->R	Neu 2	HSPG2_ITGB1	hspg2_itgb1b
11	Mac 6	L->R	Neu 2	IL15_IL15RA	il15l_il15ra
11	Mac 6	L->R	Neu 2	IL15_IL2RB	il15l_csf2rb
11	Mac 6	L->R	Neu 2	IL15_IL2RB	il15l_il21r.1
11	Mac 6	L->R	Neu 2	LPL_CD44	lpl_cd44b
11	Mac 6	L->R	Neu 2	PLTP_ABCA1	pltp_abca1a
11	Mac 6	L->R	Neu 2	PLTP_ABCA1	pltp_abca1b
11	Mac 6	L->R	Neu 2	UBA52_TGFBR1	uba52_tgfbr1b
11	Mac 6	L->R	Neu 2	VEGFA_ITGAV	vegfab_itgav
11	Mac 6	L->R	Neu 2	VEGFA_ITGB1	vegfab_itgb1b
11	Mac 6	L->R	Neu 2	VEGFA_ITGAV	vegfaa_itgav
11	Mac 6	L->R	Neu 2	VEGFA_ITGB1	vegfaa_itgb1b
12	Mac 7	L->R	Neu 1	ADAM17_IL6R	adam17a_il6r
12	Mac 7	L->R	Neu 1	ADAM17_ITGB1	adam17a_CABZ01058721.1
12	Mac 7	L->R	Neu 1	ADAM17_ITGB1	adam17a_itgb1b
12	Mac 7	L->R	Neu 1	APP_AGER	appa_si:ch211-79k12.1
12	Mac 7	L->R	Neu 1	APP_APLP2	appa_aplp2
12	Mac 7	L->R	Neu 1	APP_CD74	appa_cd74a
12	Mac 7	L->R	Neu 1	APP_CD74	appa_cd74b
12	Mac 7	L->R	Neu 1	APP_LRP10	appa_lrp10
12	Mac 7	L->R	Neu 1	APP_NOTCH2	appa_notch2
12	Mac 7	L->R	Neu 1	APP_RPSA	appa_rpsa
12	Mac 7	L->R	Neu 1	APP_AGER	appb_si:ch211-79k12.1
12	Mac 7	L->R	Neu 1	APP_APLP2	appb_aplp2
12	Mac 7	L->R	Neu 1	APP_CD74	appb_cd74a
12	Mac 7	L->R	Neu 1	APP_CD74	appb_cd74b
12	Mac 7	L->R	Neu 1	APP_LRP10	appb_lrp10
12	Mac 7	L->R	Neu 1	APP_NOTCH2	appb_notch2
12	Mac 7	L->R	Neu 1	APP_RPSA	appb_rpsa
12	Mac 7	L->R	Neu 1	COL1A1_CD44	col1a1a_cd44b
12	Mac 7	L->R	Neu 1	COL1A1_ITGA1	col1a1a_itga1
12	Mac 7	L->R	Neu 1	COL1A1_ITGAV	col1a1a_itgav
12	Mac 7	L->R	Neu 1	COL1A1_ITGB1	col1a1a_CABZ01058721.1
12	Mac 7	L->R	Neu 1	COL1A1_ITGB1	col1a1a_itgb1b
12	Mac 7	L->R	Neu 1	GNAI2_ADCY7	gnai2b_adcy7
12	Mac 7	L->R	Neu 1	GNAI2_C5AR1	gnai2b_CABZ01041494.1
12	Mac 7	L->R	Neu 1	GNAI2_S1PR4	gnai2b_s1pr4
12	Mac 7	L->R	Neu 1	IRAK4_TLR6	irak4_tlr1
12	Mac 7	L->R	Neu 1	LAMB1_ITGA1	lamb1b_itga1
12	Mac 7	L->R	Neu 1	LPL_CD44	lpl_cd44b
12	Mac 7	L->R	Neu 1	MDK_ITGA4	mdka_itga4
12	Mac 7	L->R	Neu 1	MDK_ITGB1	mdka_CABZ01058721.1
12	Mac 7	L->R	Neu 1	MDK_ITGB1	mdka_itgb1b
12	Mac 7	L->R	Neu 1	MDK_SDC4	mdka_sdc4
12	Mac 7	L->R	Neu 1	PLTP_ABCA1	pltp_abca1a
12	Mac 7	L->R	Neu 1	PLTP_ABCA1	pltp_abca1b
12	Mac 7	L->R	Neu 1	TGFB1_CXCR4	tgfb1a_cxcr4a
12	Mac 7	L->R	Neu 1	TGFB1_CXCR4	tgfb1a_cxcr4b
12	Mac 7	L->R	Neu 1	TGFB1_ITGAV	tgfb1a_itgav
12	Mac 7	L->R	Neu 1	TGFB1_ITGB1	tgfb1a_CABZ01058721.1
12	Mac 7	L->R	Neu 1	TGFB1_ITGB1	tgfb1a_itgb1b
12	Mac 7	L->R	Neu 1	TGFB1_SMAD3	tgfb1a_smad3a
12	Mac 7	L->R	Neu 1	TGFB1_TGFBR1	tgfb1a_tgfbr1b
13	Mac 7	L->R	Neu 2	ADAM17_IL6R	adam17a_il6r
13	Mac 7	L->R	Neu 2	ADAM17_ITGB1	adam17a_itgb1b
13	Mac 7	L->R	Neu 2	APP_AGER	appa_si:ch211-79k12.1
13	Mac 7	L->R	Neu 2	APP_APLP2	appa_aplp2
13	Mac 7	L->R	Neu 2	APP_CD74	appa_cd74a
13	Mac 7	L->R	Neu 2	APP_CD74	appa_cd74b
13	Mac 7	L->R	Neu 2	APP_LRP10	appa_lrp10
13	Mac 7	L->R	Neu 2	APP_NOTCH2	appa_notch2
13	Mac 7	L->R	Neu 2	APP_RPSA	appa_rpsa
13	Mac 7	L->R	Neu 2	APP_AGER	appb_si:ch211-79k12.1
13	Mac 7	L->R	Neu 2	APP_APLP2	appb_aplp2
13	Mac 7	L->R	Neu 2	APP_CD74	appb_cd74a
13	Mac 7	L->R	Neu 2	APP_CD74	appb_cd74b
13	Mac 7	L->R	Neu 2	APP_LRP10	appb_lrp10
13	Mac 7	L->R	Neu 2	APP_NOTCH2	appb_notch2
13	Mac 7	L->R	Neu 2	APP_RPSA	appb_rpsa
13	Mac 7	L->R	Neu 2	COL1A1_CD44	col1a1a_cd44b
13	Mac 7	L->R	Neu 2	COL1A1_ITGA1	col1a1a_itga1
13	Mac 7	L->R	Neu 2	COL1A1_ITGAV	col1a1a_itgav
13	Mac 7	L->R	Neu 2	COL1A1_ITGB1	col1a1a_itgb1b
13	Mac 7	L->R	Neu 2	GNAI2_ADCY7	gnai2b_adcy7
13	Mac 7	L->R	Neu 2	GNAI2_C5AR1	gnai2b_CABZ01041494.1
13	Mac 7	L->R	Neu 2	GNAI2_CXCR3	gnai2b_cxcr3.3
13	Mac 7	L->R	Neu 2	GNAI2_S1PR4	gnai2b_s1pr4
13	Mac 7	L->R	Neu 2	LAMB1_ITGA1	lamb1b_itga1
13	Mac 7	L->R	Neu 2	LPL_CD44	lpl_cd44b
13	Mac 7	L->R	Neu 2	MDK_ITGA4	mdka_itga4
13	Mac 7	L->R	Neu 2	MDK_ITGB1	mdka_itgb1b
13	Mac 7	L->R	Neu 2	MDK_SDC4	mdka_sdc4
13	Mac 7	L->R	Neu 2	PLTP_ABCA1	pltp_abca1a
13	Mac 7	L->R	Neu 2	PLTP_ABCA1	pltp_abca1b
13	Mac 7	L->R	Neu 2	TGFB1_CXCR4	tgfb1a_cxcr4b
13	Mac 7	L->R	Neu 2	TGFB1_ITGAV	tgfb1a_itgav
13	Mac 7	L->R	Neu 2	TGFB1_ITGB1	tgfb1a_itgb1b
13	Mac 7	L->R	Neu 2	TGFB1_SMAD3	tgfb1a_smad3a
13	Mac 7	L->R	Neu 2	TGFB1_TGFBR1	tgfb1a_tgfbr1b
13	Mac 7	L->R	Neu 2	UBA52_TGFBR1	uba52_tgfbr1b
14	MN	L->R	Neu 1	ADM_RAMP2	adma_ramp2
14	MN	L->R	Neu 1	APP_AGER	appb_si:ch211-79k12.1
14	MN	L->R	Neu 1	APP_APLP2	appb_aplp2
14	MN	L->R	Neu 1	APP_CD74	appb_cd74a
14	MN	L->R	Neu 1	APP_CD74	appb_cd74b
14	MN	L->R	Neu 1	APP_LRP10	appb_lrp10
14	MN	L->R	Neu 1	APP_NOTCH2	appb_notch2
14	MN	L->R	Neu 1	APP_RPSA	appb_rpsa
14	MN	L->R	Neu 1	FN1_C5AR1	fn1a_CABZ01041494.1
14	MN	L->R	Neu 1	FN1_CD44	fn1a_cd44b
14	MN	L->R	Neu 1	FN1_ITGA4	fn1a_itga4
14	MN	L->R	Neu 1	FN1_ITGAV	fn1a_itgav
14	MN	L->R	Neu 1	FN1_ITGB1	fn1a_CABZ01058721.1
14	MN	L->R	Neu 1	FN1_ITGB1	fn1a_itgb1b
14	MN	L->R	Neu 1	LIN7C_ABCA1	lin7c_abca1a
14	MN	L->R	Neu 1	LIN7C_ABCA1	lin7c_abca1b
14	MN	L->R	Neu 1	NUCB2_ERAP1	nucb2b_erap1b
15	MN	L->R	Neu 2	ADM_RAMP2	adma_ramp2
15	MN	L->R	Neu 2	APP_AGER	appb_si:ch211-79k12.1
15	MN	L->R	Neu 2	APP_APLP2	appb_aplp2
15	MN	L->R	Neu 2	APP_CD74	appb_cd74a
15	MN	L->R	Neu 2	APP_CD74	appb_cd74b
15	MN	L->R	Neu 2	APP_LRP10	appb_lrp10
15	MN	L->R	Neu 2	APP_NOTCH2	appb_notch2
15	MN	L->R	Neu 2	APP_RPSA	appb_rpsa
15	MN	L->R	Neu 2	FN1_C5AR1	fn1a_CABZ01041494.1
15	MN	L->R	Neu 2	FN1_CD44	fn1a_cd44b
15	MN	L->R	Neu 2	FN1_ITGA4	fn1a_itga4
15	MN	L->R	Neu 2	FN1_ITGAV	fn1a_itgav
15	MN	L->R	Neu 2	FN1_ITGB1	fn1a_itgb1b
15	MN	L->R	Neu 2	LIN7C_ABCA1	lin7c_abca1a
15	MN	L->R	Neu 2	LIN7C_ABCA1	lin7c_abca1b
15	MN	L->R	Neu 2	NUCB2_ERAP1	nucb2b_erap1b
15	MN	L->R	Neu 2	UBA52_TGFBR1	uba52_tgfbr1b
16	Mac 8	L->R	Neu 1	ADAM17_IL6R	adam17a_il6r
16	Mac 8	L->R	Neu 1	ADAM17_ITGB1	adam17a_CABZ01058721.1
16	Mac 8	L->R	Neu 1	ADAM17_ITGB1	adam17a_itgb1b
16	Mac 8	L->R	Neu 1	APP_AGER	appb_si:ch211-79k12.1
16	Mac 8	L->R	Neu 1	APP_APLP2	appb_aplp2
16	Mac 8	L->R	Neu 1	APP_CD74	appb_cd74a
16	Mac 8	L->R	Neu 1	APP_CD74	appb_cd74b
16	Mac 8	L->R	Neu 1	APP_LRP10	appb_lrp10
16	Mac 8	L->R	Neu 1	APP_NOTCH2	appb_notch2
16	Mac 8	L->R	Neu 1	APP_RPSA	appb_rpsa
16	Mac 8	L->R	Neu 1	COL1A1_CD44	col1a1b_cd44b
16	Mac 8	L->R	Neu 1	COL1A1_ITGA1	col1a1b_itga1
16	Mac 8	L->R	Neu 1	COL1A1_ITGAV	col1a1b_itgav
16	Mac 8	L->R	Neu 1	COL1A1_ITGB1	col1a1b_CABZ01058721.1
16	Mac 8	L->R	Neu 1	COL1A1_ITGB1	col1a1b_itgb1b
16	Mac 8	L->R	Neu 1	HGF_CD44	hgfb_cd44b
16	Mac 8	L->R	Neu 1	HGF_ITGB1	hgfb_CABZ01058721.1
16	Mac 8	L->R	Neu 1	HGF_ITGB1	hgfb_itgb1b
16	Mac 8	L->R	Neu 1	HGF_ST14	hgfb_zmp:0000001114
16	Mac 8	L->R	Neu 1	HSPG2_ITGB1	hspg2_CABZ01058721.1
16	Mac 8	L->R	Neu 1	HSPG2_ITGB1	hspg2_itgb1b
16	Mac 8	L->R	Neu 1	LAMA5_ITGB1	lama5_CABZ01058721.1
16	Mac 8	L->R	Neu 1	LAMA5_ITGB1	lama5_itgb1b
16	Mac 8	L->R	Neu 1	LAMB1_ITGA1	lamb1b_itga1
16	Mac 8	L->R	Neu 1	LAMB1_ITGAV	lamb1b_itgav
16	Mac 8	L->R	Neu 1	LAMB1_ITGB1	lamb1b_CABZ01058721.1
16	Mac 8	L->R	Neu 1	LAMB1_ITGB1	lamb1b_itgb1b
16	Mac 8	L->R	Neu 1	LIN7C_ABCA1	lin7c_abca1a
16	Mac 8	L->R	Neu 1	LIN7C_ABCA1	lin7c_abca1b
16	Mac 8	L->R	Neu 1	SORBS1_ITGA1	sorbs1_itga1
16	Mac 8	L->R	Neu 1	TGM2_ITGA4	tgm2b_itga4
16	Mac 8	L->R	Neu 1	TGM2_ITGB1	tgm2b_CABZ01058721.1
16	Mac 8	L->R	Neu 1	TGM2_ITGB1	tgm2b_itgb1b
16	Mac 8	L->R	Neu 1	TGM2_SDC4	tgm2b_sdc4
16	Mac 8	L->R	Neu 1	VEGFA_ITGAV	vegfaa_itgav
16	Mac 8	L->R	Neu 1	VEGFA_ITGB1	vegfaa_CABZ01058721.1
16	Mac 8	L->R	Neu 1	VEGFA_ITGB1	vegfaa_itgb1b
16	Mac 8	L->R	Neu 1	VIP_GPR84	vip_gpr84
16	Mac 8	L->R	Neu 1	VIP_RAMP2	vip_ramp2
17	Mac 8	L->R	Neu 2	ADAM17_IL6R	adam17a_il6r
17	Mac 8	L->R	Neu 2	ADAM17_ITGB1	adam17a_itgb1b
17	Mac 8	L->R	Neu 2	APP_AGER	appb_si:ch211-79k12.1
17	Mac 8	L->R	Neu 2	APP_APLP2	appb_aplp2
17	Mac 8	L->R	Neu 2	APP_CD74	appb_cd74a
17	Mac 8	L->R	Neu 2	APP_CD74	appb_cd74b
17	Mac 8	L->R	Neu 2	APP_LRP10	appb_lrp10
17	Mac 8	L->R	Neu 2	APP_NOTCH2	appb_notch2
17	Mac 8	L->R	Neu 2	APP_RPSA	appb_rpsa
17	Mac 8	L->R	Neu 2	COL1A1_CD44	col1a1b_cd44b
17	Mac 8	L->R	Neu 2	COL1A1_ITGA1	col1a1b_itga1
17	Mac 8	L->R	Neu 2	COL1A1_ITGAV	col1a1b_itgav
17	Mac 8	L->R	Neu 2	COL1A1_ITGB1	col1a1b_itgb1b
17	Mac 8	L->R	Neu 2	HGF_CD44	hgfb_cd44b
17	Mac 8	L->R	Neu 2	HGF_ITGB1	hgfb_itgb1b
17	Mac 8	L->R	Neu 2	HGF_ST14	hgfb_zmp:0000001114
17	Mac 8	L->R	Neu 2	HSPG2_ITGB1	hspg2_itgb1b
17	Mac 8	L->R	Neu 2	LAMA5_ITGB1	lama5_itgb1b
17	Mac 8	L->R	Neu 2	LAMB1_ITGA1	lamb1b_itga1
17	Mac 8	L->R	Neu 2	LAMB1_ITGAV	lamb1b_itgav
17	Mac 8	L->R	Neu 2	LAMB1_ITGB1	lamb1b_itgb1b
17	Mac 8	L->R	Neu 2	LIN7C_ABCA1	lin7c_abca1a
17	Mac 8	L->R	Neu 2	LIN7C_ABCA1	lin7c_abca1b
17	Mac 8	L->R	Neu 2	SORBS1_ITGA1	sorbs1_itga1
17	Mac 8	L->R	Neu 2	TGM2_ITGA4	tgm2b_itga4
17	Mac 8	L->R	Neu 2	TGM2_ITGB1	tgm2b_itgb1b
17	Mac 8	L->R	Neu 2	TGM2_SDC4	tgm2b_sdc4
17	Mac 8	L->R	Neu 2	UBA52_TGFBR1	uba52_tgfbr1b
17	Mac 8	L->R	Neu 2	VEGFA_ITGAV	vegfaa_itgav
17	Mac 8	L->R	Neu 2	VEGFA_ITGB1	vegfaa_itgb1b
17	Mac 8	L->R	Neu 2	VIP_GPR84	vip_gpr84
17	Mac 8	L->R	Neu 2	VIP_RAMP2	vip_ramp2
18	Mac 9	L->R	Neu 1	ADAM10_CD44	adam10b_cd44b
18	Mac 9	L->R	Neu 1	ADAM10_IL6R	adam10b_il6r
18	Mac 9	L->R	Neu 1	ADAM10_NOTCH2	adam10b_notch2
18	Mac 9	L->R	Neu 1	ADAM10_TSPAN14	adam10b_tspan14
18	Mac 9	L->R	Neu 1	ADAM28_ITGA4	adam28_itga4
18	Mac 9	L->R	Neu 1	ADM_RAMP2	adma_ramp2
18	Mac 9	L->R	Neu 1	ADM_GPR84	admb_gpr84
18	Mac 9	L->R	Neu 1	ADM_RAMP2	admb_ramp2
18	Mac 9	L->R	Neu 1	COL1A1_CD44	col1a1a_cd44b
18	Mac 9	L->R	Neu 1	COL1A1_ITGA1	col1a1a_itga1
18	Mac 9	L->R	Neu 1	COL1A1_ITGAV	col1a1a_itgav
18	Mac 9	L->R	Neu 1	COL1A1_ITGB1	col1a1a_CABZ01058721.1
18	Mac 9	L->R	Neu 1	COL1A1_ITGB1	col1a1a_itgb1b
18	Mac 9	L->R	Neu 1	HRAS_INSR	hrasb_insra
18	Mac 9	L->R	Neu 1	HSPG2_ITGB1	hspg2_CABZ01058721.1
18	Mac 9	L->R	Neu 1	HSPG2_ITGB1	hspg2_itgb1b
18	Mac 9	L->R	Neu 1	INHBB_ACVR2A	inhbb_acvr2aa
18	Mac 9	L->R	Neu 1	INHBB_SMAD3	inhbb_smad3a
18	Mac 9	L->R	Neu 1	LAMB1_ITGA1	lamb1b_itga1
18	Mac 9	L->R	Neu 1	LAMB1_ITGAV	lamb1b_itgav
18	Mac 9	L->R	Neu 1	LAMB1_ITGB1	lamb1b_CABZ01058721.1
18	Mac 9	L->R	Neu 1	LAMB1_ITGB1	lamb1b_itgb1b
19	Mac 9	L->R	Neu 2	ADAM10_CD44	adam10b_cd44b
19	Mac 9	L->R	Neu 2	ADAM10_IL6R	adam10b_il6r
19	Mac 9	L->R	Neu 2	ADAM10_NOTCH2	adam10b_notch2
19	Mac 9	L->R	Neu 2	ADAM10_TSPAN14	adam10b_tspan14
19	Mac 9	L->R	Neu 2	ADAM28_ITGA4	adam28_itga4
19	Mac 9	L->R	Neu 2	ADM_RAMP2	adma_ramp2
19	Mac 9	L->R	Neu 2	ADM_GPR84	admb_gpr84
19	Mac 9	L->R	Neu 2	ADM_RAMP2	admb_ramp2
19	Mac 9	L->R	Neu 2	COL1A1_CD44	col1a1a_cd44b
19	Mac 9	L->R	Neu 2	COL1A1_ITGA1	col1a1a_itga1
19	Mac 9	L->R	Neu 2	COL1A1_ITGAV	col1a1a_itgav
19	Mac 9	L->R	Neu 2	COL1A1_ITGB1	col1a1a_itgb1b
19	Mac 9	L->R	Neu 2	HRAS_INSR	hrasb_insra
19	Mac 9	L->R	Neu 2	HSPG2_ITGB1	hspg2_itgb1b
19	Mac 9	L->R	Neu 2	INHBB_ACVR2A	inhbb_acvr2aa
19	Mac 9	L->R	Neu 2	INHBB_SMAD3	inhbb_smad3a
19	Mac 9	L->R	Neu 2	LAMB1_ITGA1	lamb1b_itga1
19	Mac 9	L->R	Neu 2	LAMB1_ITGAV	lamb1b_itgav
19	Mac 9	L->R	Neu 2	LAMB1_ITGB1	lamb1b_itgb1b
19	Mac 9	L->R	Neu 2	UBA52_TGFBR1	uba52_tgfbr1b

## Sheet: CL3d-specific
3dpci_Mac-ligand to Neu-receptor
Cluster pair ID	CT1	pair type	CT2	human L-R pair	L-R pair
0	Mac 1	L->R	Neu 1	AFDN_NECTIN2	afdna_si:ch73-22o12.1
0	Mac 1	L->R	Neu 1	APP_PTGER2	appa_ptger2a
0	Mac 1	L->R	Neu 1	APP_PTGER2	appb_ptger2a
0	Mac 1	L->R	Neu 1	CNTF_IL6R	m17_il6r
0	Mac 1	L->R	Neu 1	CSF3_CSF3R	csf3a_csf3r
0	Mac 1	L->R	Neu 1	CSF3_CSF3R	csf3b_csf3r
0	Mac 1	L->R	Neu 1	CXCL9_CXCR3	BX323596.2_cxcr3.3
0	Mac 1	L->R	Neu 1	F13A1_ITGA4	f13a1a.1_itga4
0	Mac 1	L->R	Neu 1	F13A1_ITGB1	f13a1a.1_CABZ01058721.1
0	Mac 1	L->R	Neu 1	F13A1_ITGB1	f13a1a.1_itgb1b
0	Mac 1	L->R	Neu 1	GNAI2_CXCR3	gnai2b_cxcr3.3
0	Mac 1	L->R	Neu 1	GNAI2_CXCR3	gnai2a_cxcr3.3
0	Mac 1	L->R	Neu 1	HBEGF_CD82	hbegfa_cd82a
0	Mac 1	L->R	Neu 1	HBEGF_CD82	hbegfb_cd82a
0	Mac 1	L->R	Neu 1	HGF_CD44	hgfb_cd44b
0	Mac 1	L->R	Neu 1	HGF_ITGB1	hgfb_CABZ01058721.1
0	Mac 1	L->R	Neu 1	HGF_ITGB1	hgfb_itgb1b
0	Mac 1	L->R	Neu 1	HGF_ST14	hgfb_zmp:0000001114
0	Mac 1	L->R	Neu 1	INHBA_ACVR2A	inhbaa_acvr2aa
0	Mac 1	L->R	Neu 1	INHBA_SMAD3	inhbaa_smad3a
0	Mac 1	L->R	Neu 1	KITLG_EPOR	kitlga_il4r.1
0	Mac 1	L->R	Neu 1	LMAN1_MCFD2	lman1_mcfd2
0	Mac 1	L->R	Neu 1	MMP1_CD44	mmp13a_cd44b
0	Mac 1	L->R	Neu 1	TNF_TNFRSF1A	tnfa_fas
0	Mac 1	L->R	Neu 1	TNF_TNFRSF1B	tnfa_tnfrsf1b
0	Mac 1	L->R	Neu 1	TNF_TRADD	tnfa_tradd
1	Mac 1	L->R	Neu 2	ADAM17_ITGA5	adam17a_itga5
1	Mac 1	L->R	Neu 2	ADAM17_ITGB1	adam17a_CABZ01058721.1
1	Mac 1	L->R	Neu 2	ADAM9_ITGB1	adam9_CABZ01058721.1
1	Mac 1	L->R	Neu 2	AFDN_NECTIN2	afdna_si:ch73-22o12.1
1	Mac 1	L->R	Neu 2	APP_PTGER2	appa_ptger2b
1	Mac 1	L->R	Neu 2	APP_PTGER2	appa_ptger2a
1	Mac 1	L->R	Neu 2	APP_PTGER2	appb_ptger2b
1	Mac 1	L->R	Neu 2	APP_PTGER2	appb_ptger2a
1	Mac 1	L->R	Neu 2	CNTF_IL6R	m17_il6r
1	Mac 1	L->R	Neu 2	CSF3_CSF3R	csf3a_csf3r
1	Mac 1	L->R	Neu 2	CSF3_CSF3R	csf3b_csf3r
1	Mac 1	L->R	Neu 2	F13A1_ITGB1	f13a1b_CABZ01058721.1
1	Mac 1	L->R	Neu 2	F13A1_ITGA4	f13a1a.1_itga4
1	Mac 1	L->R	Neu 2	F13A1_ITGB1	f13a1a.1_CABZ01058721.1
1	Mac 1	L->R	Neu 2	F13A1_ITGB1	f13a1a.1_itgb1b
1	Mac 1	L->R	Neu 2	FN1_ITGA5	fn1a_itga5
1	Mac 1	L->R	Neu 2	FN1_ITGB1	fn1a_CABZ01058721.1
1	Mac 1	L->R	Neu 2	FN1_ITGB7	fn1a_itgb7
1	Mac 1	L->R	Neu 2	HGF_CD44	hgfb_cd44b
1	Mac 1	L->R	Neu 2	HGF_ITGB1	hgfb_CABZ01058721.1
1	Mac 1	L->R	Neu 2	HGF_ITGB1	hgfb_itgb1b
1	Mac 1	L->R	Neu 2	HSPG2_ITGB1	hspg2_CABZ01058721.1
1	Mac 1	L->R	Neu 2	IL16_CD4	il16_dicp2.2
1	Mac 1	L->R	Neu 2	INHBA_ACVR2A	inhbaa_acvr2aa
1	Mac 1	L->R	Neu 2	INHBA_SMAD3	inhbaa_smad3a
1	Mac 1	L->R	Neu 2	KITLG_EPOR	kitlga_il4r.1
1	Mac 1	L->R	Neu 2	LAMB1_ITGB1	lamb1b_CABZ01058721.1
1	Mac 1	L->R	Neu 2	MMP1_CD44	mmp13a_cd44b
1	Mac 1	L->R	Neu 2	TIMP2_ITGB1	timp2b_CABZ01058721.1
1	Mac 1	L->R	Neu 2	TNF_TNFRSF1A	tnfa_fas
1	Mac 1	L->R	Neu 2	TNF_TNFRSF1B	tnfa_tnfrsf1b
1	Mac 1	L->R	Neu 2	TNF_TRADD	tnfa_tradd
2	Mac 2	L->R	Neu 1	ADM_GPR84	adma_gpr84
2	Mac 2	L->R	Neu 1	APP_PTGER2	appa_ptger2a
2	Mac 2	L->R	Neu 1	CNTF_IL6R	m17_il6r
2	Mac 2	L->R	Neu 1	COL1A1_CD44	col1a1a_cd44b
2	Mac 2	L->R	Neu 1	COL1A1_ITGAV	col1a1a_itgav
2	Mac 2	L->R	Neu 1	COL1A1_ITGB1	col1a1a_CABZ01058721.1
2	Mac 2	L->R	Neu 1	COL1A1_ITGB1	col1a1a_itgb1b
2	Mac 2	L->R	Neu 1	COL1A1_CD44	col1a1b_cd44b
2	Mac 2	L->R	Neu 1	COL1A1_ITGAV	col1a1b_itgav
2	Mac 2	L->R	Neu 1	COL1A1_ITGB1	col1a1b_CABZ01058721.1
2	Mac 2	L->R	Neu 1	COL1A1_ITGB1	col1a1b_itgb1b
2	Mac 2	L->R	Neu 1	CSF3_CSF3R	csf3a_csf3r
2	Mac 2	L->R	Neu 1	CSF3_CSF3R	csf3b_csf3r
2	Mac 2	L->R	Neu 1	CXCL9_CXCR3	cxcl11.5_cxcr3.3
2	Mac 2	L->R	Neu 1	CXCL9_CXCR3	BX323596.1_cxcr3.3
2	Mac 2	L->R	Neu 1	CXCL9_CXCR3	BX323596.2_cxcr3.3
2	Mac 2	L->R	Neu 1	FN1_C5AR1	fn1b_CABZ01041494.1
2	Mac 2	L->R	Neu 1	FN1_CD44	fn1b_cd44b
2	Mac 2	L->R	Neu 1	FN1_ITGA4	fn1b_itga4
2	Mac 2	L->R	Neu 1	FN1_ITGAV	fn1b_itgav
2	Mac 2	L->R	Neu 1	FN1_ITGB1	fn1b_CABZ01058721.1
2	Mac 2	L->R	Neu 1	FN1_ITGB1	fn1b_itgb1b
2	Mac 2	L->R	Neu 1	GNAI2_CXCR3	gnai2b_cxcr3.3
2	Mac 2	L->R	Neu 1	GNAI2_CXCR3	gnai2a_cxcr3.3
2	Mac 2	L->R	Neu 1	HBEGF_CD82	hbegfa_cd82a
2	Mac 2	L->R	Neu 1	HBEGF_CD82	hbegfb_cd82a
2	Mac 2	L->R	Neu 1	IL15_IL15RA	il15l_il15ra
2	Mac 2	L->R	Neu 1	IL15_IL2RB	il15l_csf2rb
2	Mac 2	L->R	Neu 1	IL15_IL2RB	il15l_il21r.1
2	Mac 2	L->R	Neu 1	MFGE8_ITGAV	mfge8a_itgav
2	Mac 2	L->R	Neu 1	NUCB2_ERAP1	nucb2b_erap1b
2	Mac 2	L->R	Neu 1	TNF_TNFRSF1A	tnfa_fas
2	Mac 2	L->R	Neu 1	TNF_TNFRSF1B	tnfa_tnfrsf1b
2	Mac 2	L->R	Neu 1	TNF_TRADD	tnfa_tradd
3	Mac 2	L->R	Neu 2	ADAM17_ITGA5	adam17a_itga5
3	Mac 2	L->R	Neu 2	ADAM17_ITGB1	adam17a_CABZ01058721.1
3	Mac 2	L->R	Neu 2	ADAM9_ITGB1	adam9_CABZ01058721.1
3	Mac 2	L->R	Neu 2	ADM_GPR84	adma_gpr84
3	Mac 2	L->R	Neu 2	APP_PTGER2	appa_ptger2b
3	Mac 2	L->R	Neu 2	APP_PTGER2	appa_ptger2a
3	Mac 2	L->R	Neu 2	CNTF_IL6R	m17_il6r
3	Mac 2	L->R	Neu 2	COL1A1_CD44	col1a1a_cd44b
3	Mac 2	L->R	Neu 2	COL1A1_ITGA5	col1a1a_itga5
3	Mac 2	L->R	Neu 2	COL1A1_ITGAV	col1a1a_itgav
3	Mac 2	L->R	Neu 2	COL1A1_ITGB1	col1a1a_CABZ01058721.1
3	Mac 2	L->R	Neu 2	COL1A1_ITGB1	col1a1a_itgb1b
3	Mac 2	L->R	Neu 2	COL1A1_CD44	col1a1b_cd44b
3	Mac 2	L->R	Neu 2	COL1A1_ITGA5	col1a1b_itga5
3	Mac 2	L->R	Neu 2	COL1A1_ITGAV	col1a1b_itgav
3	Mac 2	L->R	Neu 2	COL1A1_ITGB1	col1a1b_CABZ01058721.1
3	Mac 2	L->R	Neu 2	COL1A1_ITGB1	col1a1b_itgb1b
3	Mac 2	L->R	Neu 2	CSF3_CSF3R	csf3a_csf3r
3	Mac 2	L->R	Neu 2	CSF3_CSF3R	csf3b_csf3r
3	Mac 2	L->R	Neu 2	CXCL9_CXCR3	cxcl11.5_cxcr3.3
3	Mac 2	L->R	Neu 2	CXCL9_CXCR3	BX323596.1_cxcr3.3
3	Mac 2	L->R	Neu 2	F13A1_ITGB1	f13a1b_CABZ01058721.1
3	Mac 2	L->R	Neu 2	FN1_C5AR1	fn1b_CABZ01041494.1
3	Mac 2	L->R	Neu 2	FN1_CD44	fn1b_cd44b
3	Mac 2	L->R	Neu 2	FN1_ITGA4	fn1b_itga4
3	Mac 2	L->R	Neu 2	FN1_ITGA5	fn1b_itga5
3	Mac 2	L->R	Neu 2	FN1_ITGAV	fn1b_itgav
3	Mac 2	L->R	Neu 2	FN1_ITGB1	fn1b_CABZ01058721.1
3	Mac 2	L->R	Neu 2	FN1_ITGB1	fn1b_itgb1b
3	Mac 2	L->R	Neu 2	FN1_ITGB7	fn1b_itgb7
3	Mac 2	L->R	Neu 2	FN1_ITGA5	fn1a_itga5
3	Mac 2	L->R	Neu 2	FN1_ITGB1	fn1a_CABZ01058721.1
3	Mac 2	L->R	Neu 2	FN1_ITGB7	fn1a_itgb7
3	Mac 2	L->R	Neu 2	HSPG2_ITGB1	hspg2_CABZ01058721.1
3	Mac 2	L->R	Neu 2	IL15_IL15RA	il15l_il15ra
3	Mac 2	L->R	Neu 2	IL15_IL2RB	il15l_csf2rb
3	Mac 2	L->R	Neu 2	IL15_IL2RB	il15l_il21r.1
3	Mac 2	L->R	Neu 2	IL16_CD4	il16_dicp2.2
3	Mac 2	L->R	Neu 2	MDK_ITGB1	mdka_CABZ01058721.1
3	Mac 2	L->R	Neu 2	MFGE8_ITGAV	mfge8a_itgav
3	Mac 2	L->R	Neu 2	NUCB2_ERAP1	nucb2b_erap1b
3	Mac 2	L->R	Neu 2	TIMP2_ITGB1	timp2b_CABZ01058721.1
3	Mac 2	L->R	Neu 2	TNF_TNFRSF1A	tnfa_fas
3	Mac 2	L->R	Neu 2	TNF_TNFRSF1B	tnfa_tnfrsf1b
3	Mac 2	L->R	Neu 2	TNF_TRADD	tnfa_tradd
4	Mac 3	L->R	Neu 1	ADM_GPR84	adma_gpr84
4	Mac 3	L->R	Neu 1	APP_PTGER2	appa_ptger2a
4	Mac 3	L->R	Neu 1	APP_PTGER2	appb_ptger2a
4	Mac 3	L->R	Neu 1	CNTF_IL6R	m17_il6r
4	Mac 3	L->R	Neu 1	CXCL9_CXCR3	BX323596.1_cxcr3.3
4	Mac 3	L->R	Neu 1	CXCL9_CXCR3	BX323596.2_cxcr3.3
4	Mac 3	L->R	Neu 1	F13A1_ITGA4	f13a1a.1_itga4
4	Mac 3	L->R	Neu 1	F13A1_ITGB1	f13a1a.1_CABZ01058721.1
4	Mac 3	L->R	Neu 1	F13A1_ITGB1	f13a1a.1_itgb1b
4	Mac 3	L->R	Neu 1	GNAI2_CXCR3	gnai2b_cxcr3.3
4	Mac 3	L->R	Neu 1	GNAI2_CXCR3	gnai2a_cxcr3.3
4	Mac 3	L->R	Neu 1	HBEGF_CD82	hbegfa_cd82a
4	Mac 3	L->R	Neu 1	HBEGF_CD82	hbegfb_cd82a
4	Mac 3	L->R	Neu 1	KITLG_EPOR	kitlga_il4r.1
4	Mac 3	L->R	Neu 1	LAMB1_ITGAV	lamb1b_itgav
4	Mac 3	L->R	Neu 1	LAMB1_ITGB1	lamb1b_CABZ01058721.1
4	Mac 3	L->R	Neu 1	LAMB1_ITGB1	lamb1b_itgb1b
4	Mac 3	L->R	Neu 1	LMAN1_MCFD2	lman1_mcfd2
4	Mac 3	L->R	Neu 1	LTF_TFRC	tfa_tfr1b
4	Mac 3	L->R	Neu 1	MFGE8_ITGAV	mfge8a_itgav
4	Mac 3	L->R	Neu 1	NAMPT_INSR	nampta_insra
4	Mac 3	L->R	Neu 1	TGFB1_CXCR4	tgfb1b_cxcr4a
4	Mac 3	L->R	Neu 1	TGFB1_CXCR4	tgfb1b_cxcr4b
4	Mac 3	L->R	Neu 1	TGFB1_ITGAV	tgfb1b_itgav
4	Mac 3	L->R	Neu 1	TGFB1_ITGB1	tgfb1b_CABZ01058721.1
4	Mac 3	L->R	Neu 1	TGFB1_ITGB1	tgfb1b_itgb1b
4	Mac 3	L->R	Neu 1	TGFB1_SMAD3	tgfb1b_smad3a
4	Mac 3	L->R	Neu 1	TGFB1_TGFBR1	tgfb1b_tgfbr1b
4	Mac 3	L->R	Neu 1	TNF_TNFRSF1A	tnfa_fas
4	Mac 3	L->R	Neu 1	TNF_TNFRSF1B	tnfa_tnfrsf1b
4	Mac 3	L->R	Neu 1	TNF_TRADD	tnfa_tradd
5	Mac 3	L->R	Neu 2	ADAM17_ITGA5	adam17a_itga5
5	Mac 3	L->R	Neu 2	ADAM17_ITGB1	adam17a_CABZ01058721.1
5	Mac 3	L->R	Neu 2	ADAM9_ITGB1	adam9_CABZ01058721.1
5	Mac 3	L->R	Neu 2	ADM_GPR84	adma_gpr84
5	Mac 3	L->R	Neu 2	APP_PTGER2	appa_ptger2b
5	Mac 3	L->R	Neu 2	APP_PTGER2	appa_ptger2a
5	Mac 3	L->R	Neu 2	APP_PTGER2	appb_ptger2b
5	Mac 3	L->R	Neu 2	APP_PTGER2	appb_ptger2a
5	Mac 3	L->R	Neu 2	CNTF_IL6R	m17_il6r
5	Mac 3	L->R	Neu 2	CXCL9_CXCR3	BX323596.1_cxcr3.3
5	Mac 3	L->R	Neu 2	F13A1_ITGB1	f13a1b_CABZ01058721.1
5	Mac 3	L->R	Neu 2	F13A1_ITGA4	f13a1a.1_itga4
5	Mac 3	L->R	Neu 2	F13A1_ITGB1	f13a1a.1_CABZ01058721.1
5	Mac 3	L->R	Neu 2	F13A1_ITGB1	f13a1a.1_itgb1b
5	Mac 3	L->R	Neu 2	FN1_ITGA5	fn1a_itga5
5	Mac 3	L->R	Neu 2	FN1_ITGB1	fn1a_CABZ01058721.1
5	Mac 3	L->R	Neu 2	FN1_ITGB7	fn1a_itgb7
5	Mac 3	L->R	Neu 2	HGF_ITGB1	hgfb_CABZ01058721.1
5	Mac 3	L->R	Neu 2	HSPG2_ITGB1	hspg2_CABZ01058721.1
5	Mac 3	L->R	Neu 2	IL16_CD4	il16_dicp2.2
5	Mac 3	L->R	Neu 2	KITLG_EPOR	kitlga_il4r.1
5	Mac 3	L->R	Neu 2	LAMB1_ITGAV	lamb1b_itgav
5	Mac 3	L->R	Neu 2	LAMB1_ITGB1	lamb1b_CABZ01058721.1
5	Mac 3	L->R	Neu 2	LAMB1_ITGB1	lamb1b_itgb1b
5	Mac 3	L->R	Neu 2	LTF_TFRC	tfa_tfr1b
5	Mac 3	L->R	Neu 2	MFGE8_ITGAV	mfge8a_itgav
5	Mac 3	L->R	Neu 2	NAMPT_INSR	nampta_insra
5	Mac 3	L->R	Neu 2	TGFB1_CXCR4	tgfb1b_cxcr4b
5	Mac 3	L->R	Neu 2	TGFB1_ITGAV	tgfb1b_itgav
5	Mac 3	L->R	Neu 2	TGFB1_ITGB1	tgfb1b_CABZ01058721.1
5	Mac 3	L->R	Neu 2	TGFB1_ITGB1	tgfb1b_itgb1b
5	Mac 3	L->R	Neu 2	TGFB1_SMAD3	tgfb1b_smad3a
5	Mac 3	L->R	Neu 2	TIMP2_ITGB1	timp2b_CABZ01058721.1
5	Mac 3	L->R	Neu 2	TNF_TNFRSF1A	tnfa_fas
5	Mac 3	L->R	Neu 2	TNF_TNFRSF1B	tnfa_tnfrsf1b
5	Mac 3	L->R	Neu 2	TNF_TRADD	tnfa_tradd
6	Mac 4	L->R	Neu 1	ADM_GPR84	adma_gpr84
6	Mac 4	L->R	Neu 1	APP_PTGER2	appa_ptger2a
6	Mac 4	L->R	Neu 1	CXCL9_CXCR3	BX323596.1_cxcr3.3
6	Mac 4	L->R	Neu 1	CXCL9_CXCR3	BX323596.2_cxcr3.3
6	Mac 4	L->R	Neu 1	F13A1_ITGA4	f13a1a.1_itga4
6	Mac 4	L->R	Neu 1	F13A1_ITGB1	f13a1a.1_CABZ01058721.1
6	Mac 4	L->R	Neu 1	F13A1_ITGB1	f13a1a.1_itgb1b
6	Mac 4	L->R	Neu 1	GNAI2_CXCR3	gnai2b_cxcr3.3
6	Mac 4	L->R	Neu 1	GNAI2_CXCR3	gnai2a_cxcr3.3
6	Mac 4	L->R	Neu 1	HBEGF_CD82	hbegfa_cd82a
6	Mac 4	L->R	Neu 1	HBEGF_CD82	hbegfb_cd82a
6	Mac 4	L->R	Neu 1	KITLG_EPOR	kitlga_il4r.1
6	Mac 4	L->R	Neu 1	LMAN1_MCFD2	lman1_mcfd2
6	Mac 4	L->R	Neu 1	MFGE8_ITGAV	mfge8a_itgav
6	Mac 4	L->R	Neu 1	MMP1_CD44	mmp13a_cd44b
6	Mac 4	L->R	Neu 1	TNFSF13B_TFRC	tnfsf13b_tfr1b
7	Mac 4	L->R	Neu 2	ADAM17_ITGA5	adam17a_itga5
7	Mac 4	L->R	Neu 2	ADAM17_ITGB1	adam17a_CABZ01058721.1
7	Mac 4	L->R	Neu 2	ADAM9_ITGB1	adam9_CABZ01058721.1
7	Mac 4	L->R	Neu 2	ADM_GPR84	adma_gpr84
7	Mac 4	L->R	Neu 2	APP_PTGER2	appa_ptger2b
7	Mac 4	L->R	Neu 2	APP_PTGER2	appa_ptger2a
7	Mac 4	L->R	Neu 2	F13A1_ITGB1	f13a1b_CABZ01058721.1
7	Mac 4	L->R	Neu 2	F13A1_ITGA4	f13a1a.1_itga4
7	Mac 4	L->R	Neu 2	F13A1_ITGB1	f13a1a.1_CABZ01058721.1
7	Mac 4	L->R	Neu 2	F13A1_ITGB1	f13a1a.1_itgb1b
7	Mac 4	L->R	Neu 2	FN1_ITGA5	fn1a_itga5
7	Mac 4	L->R	Neu 2	FN1_ITGB1	fn1a_CABZ01058721.1
7	Mac 4	L->R	Neu 2	FN1_ITGB7	fn1a_itgb7
7	Mac 4	L->R	Neu 2	HSPG2_ITGB1	hspg2_CABZ01058721.1
7	Mac 4	L->R	Neu 2	IL16_CD4	il16_dicp2.2
7	Mac 4	L->R	Neu 2	KITLG_EPOR	kitlga_il4r.1
7	Mac 4	L->R	Neu 2	LAMB1_ITGB1	lamb1b_CABZ01058721.1
7	Mac 4	L->R	Neu 2	MFGE8_ITGAV	mfge8a_itgav
7	Mac 4	L->R	Neu 2	MMP1_CD44	mmp13a_cd44b
7	Mac 4	L->R	Neu 2	TIMP2_ITGB1	timp2b_CABZ01058721.1
7	Mac 4	L->R	Neu 2	TNFSF13B_TFRC	tnfsf13b_tfr1b
8	Mac 5	L->R	Neu 1	ADAM28_ITGA4	adam28_itga4
8	Mac 5	L->R	Neu 1	ADM_GPR84	adma_gpr84
8	Mac 5	L->R	Neu 1	APP_PTGER2	appa_ptger2a
8	Mac 5	L->R	Neu 1	CNTF_IL6R	m17_il6r
8	Mac 5	L->R	Neu 1	CXCL9_CXCR3	BX323596.2_cxcr3.3
8	Mac 5	L->R	Neu 1	GNAI2_CXCR3	gnai2b_cxcr3.3
8	Mac 5	L->R	Neu 1	GNAI2_CXCR3	gnai2a_cxcr3.3
8	Mac 5	L->R	Neu 1	HBEGF_CD82	hbegfa_cd82a
8	Mac 5	L->R	Neu 1	HBEGF_CD82	hbegfb_cd82a
8	Mac 5	L->R	Neu 1	LMAN1_MCFD2	lman1_mcfd2
8	Mac 5	L->R	Neu 1	LTF_TFRC	tfa_tfr1b
8	Mac 5	L->R	Neu 1	MMP1_CD44	mmp13a_cd44b
8	Mac 5	L->R	Neu 1	NAMPT_INSR	nampta_insra
9	Mac 5	L->R	Neu 2	ADAM17_ITGA5	adam17a_itga5
9	Mac 5	L->R	Neu 2	ADAM17_ITGB1	adam17a_CABZ01058721.1
9	Mac 5	L->R	Neu 2	ADAM28_ITGA4	adam28_itga4
9	Mac 5	L->R	Neu 2	ADAM9_ITGB1	adam9_CABZ01058721.1
9	Mac 5	L->R	Neu 2	ADM_GPR84	adma_gpr84
9	Mac 5	L->R	Neu 2	APP_PTGER2	appa_ptger2b
9	Mac 5	L->R	Neu 2	APP_PTGER2	appa_ptger2a
9	Mac 5	L->R	Neu 2	CNTF_IL6R	m17_il6r
9	Mac 5	L->R	Neu 2	F13A1_ITGB1	f13a1b_CABZ01058721.1
9	Mac 5	L->R	Neu 2	FN1_ITGA5	fn1a_itga5
9	Mac 5	L->R	Neu 2	FN1_ITGB1	fn1a_CABZ01058721.1
9	Mac 5	L->R	Neu 2	FN1_ITGB7	fn1a_itgb7
9	Mac 5	L->R	Neu 2	HSPG2_ITGB1	hspg2_CABZ01058721.1
9	Mac 5	L->R	Neu 2	IL16_CD4	il16_dicp2.2
9	Mac 5	L->R	Neu 2	LTF_TFRC	tfa_tfr1b
9	Mac 5	L->R	Neu 2	MMP1_CD44	mmp13a_cd44b
9	Mac 5	L->R	Neu 2	NAMPT_INSR	nampta_insra
9	Mac 5	L->R	Neu 2	TIMP2_ITGB1	timp2b_CABZ01058721.1
10	Mac 6	L->R	Neu 1	APP_PTGER2	appa_ptger2a
10	Mac 6	L->R	Neu 1	C3_CD81	c3a.1_cd81a
10	Mac 6	L->R	Neu 1	C3_ITGAX	c3a.1_si:dkey-32n7.4
10	Mac 6	L->R	Neu 1	C3_ITGAX	c3a.1_itgam
10	Mac 6	L->R	Neu 1	C3_ITGB2	c3a.1_itgb2
10	Mac 6	L->R	Neu 1	CNTF_IL6R	m17_il6r
10	Mac 6	L->R	Neu 1	CXCL9_CXCR3	BX323596.1_cxcr3.3
10	Mac 6	L->R	Neu 1	CXCL9_CXCR3	BX323596.2_cxcr3.3
10	Mac 6	L->R	Neu 1	GNAI2_CXCR3	gnai2b_cxcr3.3
10	Mac 6	L->R	Neu 1	GNAI2_CXCR3	gnai2a_cxcr3.3
10	Mac 6	L->R	Neu 1	HBEGF_CD82	hbegfa_cd82a
10	Mac 6	L->R	Neu 1	HBEGF_CD44	hbegfb_cd44b
10	Mac 6	L->R	Neu 1	HBEGF_CD82	hbegfb_cd82a
10	Mac 6	L->R	Neu 1	HBEGF_CD82	hbegfb_cd82b
10	Mac 6	L->R	Neu 1	KITLG_EPOR	kitlga_il4r.1
10	Mac 6	L->R	Neu 1	LGALS9_CD44	lgals3b_cd44b
10	Mac 6	L->R	Neu 1	LGALS9_SLC1A5	lgals3b_slc1a5
10	Mac 6	L->R	Neu 1	LMAN1_MCFD2	lman1_mcfd2
10	Mac 6	L->R	Neu 1	MFGE8_ITGAV	mfge8a_itgav
10	Mac 6	L->R	Neu 1	NAMPT_INSR	nampta_insra
10	Mac 6	L->R	Neu 1	RLN3_GPR84	rln3a_gpr84
10	Mac 6	L->R	Neu 1	TNF_TNFRSF1A	tnfa_fas
10	Mac 6	L->R	Neu 1	TNF_TNFRSF1B	tnfa_tnfrsf1b
10	Mac 6	L->R	Neu 1	TNF_TRADD	tnfa_tradd
11	Mac 6	L->R	Neu 2	ADAM17_ITGA5	adam17a_itga5
11	Mac 6	L->R	Neu 2	ADAM17_ITGB1	adam17a_CABZ01058721.1
11	Mac 6	L->R	Neu 2	ADAM9_ITGB1	adam9_CABZ01058721.1
11	Mac 6	L->R	Neu 2	APP_PTGER2	appa_ptger2b
11	Mac 6	L->R	Neu 2	APP_PTGER2	appa_ptger2a
11	Mac 6	L->R	Neu 2	C3_CD81	c3a.1_cd81a
11	Mac 6	L->R	Neu 2	C3_ITGAX	c3a.1_si:dkey-32n7.4
11	Mac 6	L->R	Neu 2	C3_ITGB2	c3a.1_itgb2
11	Mac 6	L->R	Neu 2	CNTF_IL6R	m17_il6r
11	Mac 6	L->R	Neu 2	CXCL9_CXCR3	BX323596.1_cxcr3.3
11	Mac 6	L->R	Neu 2	F13A1_ITGB1	f13a1b_CABZ01058721.1
11	Mac 6	L->R	Neu 2	FN1_ITGA5	fn1a_itga5
11	Mac 6	L->R	Neu 2	FN1_ITGB1	fn1a_CABZ01058721.1
11	Mac 6	L->R	Neu 2	FN1_ITGB7	fn1a_itgb7
11	Mac 6	L->R	Neu 2	HBEGF_CD44	hbegfb_cd44b
11	Mac 6	L->R	Neu 2	HBEGF_CD82	hbegfb_cd82a
11	Mac 6	L->R	Neu 2	HBEGF_CD82	hbegfb_cd82b
11	Mac 6	L->R	Neu 2	IL16_CD4	il16_dicp2.2
11	Mac 6	L->R	Neu 2	KITLG_EPOR	kitlga_il4r.1
11	Mac 6	L->R	Neu 2	LGALS9_CD44	lgals3b_cd44b
11	Mac 6	L->R	Neu 2	LGALS9_SLC1A5	lgals3b_slc1a5
11	Mac 6	L->R	Neu 2	MFGE8_ITGAV	mfge8a_itgav
11	Mac 6	L->R	Neu 2	NAMPT_INSR	nampta_insra
11	Mac 6	L->R	Neu 2	RLN3_GPR84	rln3a_gpr84
11	Mac 6	L->R	Neu 2	TIMP2_ITGB1	timp2b_CABZ01058721.1
11	Mac 6	L->R	Neu 2	TNF_TNFRSF1A	tnfa_fas
11	Mac 6	L->R	Neu 2	TNF_TNFRSF1B	tnfa_tnfrsf1b
11	Mac 6	L->R	Neu 2	TNF_TRADD	tnfa_tradd
12	Mac 7	L->R	Neu 1	ADAM28_ITGA4	adam28_itga4
12	Mac 7	L->R	Neu 1	CALR_ITGAV	calr_itgav
12	Mac 7	L->R	Neu 1	COL1A2_CD44	col1a2_cd44b
12	Mac 7	L->R	Neu 1	COL1A2_ITGAV	col1a2_itgav
12	Mac 7	L->R	Neu 1	COL1A2_ITGB1	col1a2_CABZ01058721.1
12	Mac 7	L->R	Neu 1	COL1A2_ITGB1	col1a2_itgb1b
12	Mac 7	L->R	Neu 1	CXCL9_CXCR3	BX323596.1_cxcr3.3
12	Mac 7	L->R	Neu 1	CXCL9_CXCR3	BX323596.2_cxcr3.3
12	Mac 7	L->R	Neu 1	FADD_ABCA1	fadd_abca1a
12	Mac 7	L->R	Neu 1	FADD_ABCA1	fadd_abca1b
12	Mac 7	L->R	Neu 1	FADD_TRADD	fadd_tradd
12	Mac 7	L->R	Neu 1	FN1_C5AR1	fn1b_CABZ01041494.1
12	Mac 7	L->R	Neu 1	FN1_CD44	fn1b_cd44b
12	Mac 7	L->R	Neu 1	FN1_ITGA4	fn1b_itga4
12	Mac 7	L->R	Neu 1	FN1_ITGAV	fn1b_itgav
12	Mac 7	L->R	Neu 1	FN1_ITGB1	fn1b_CABZ01058721.1
12	Mac 7	L->R	Neu 1	FN1_ITGB1	fn1b_itgb1b
12	Mac 7	L->R	Neu 1	GNAI2_CXCR3	gnai2a_cxcr3.3
12	Mac 7	L->R	Neu 1	HBEGF_CD82	hbegfa_cd82a
12	Mac 7	L->R	Neu 1	HBEGF_CD82	hbegfb_cd82a
12	Mac 7	L->R	Neu 1	HMGB1_AGER	hmgb1b_si:ch211-79k12.1
12	Mac 7	L->R	Neu 1	HMGB1_CXCR4	hmgb1b_cxcr4a
12	Mac 7	L->R	Neu 1	HMGB1_CXCR4	hmgb1b_cxcr4b
12	Mac 7	L->R	Neu 1	HRAS_INSR	hrasb_insra
12	Mac 7	L->R	Neu 1	HSPG2_ITGB1	hspg2_CABZ01058721.1
12	Mac 7	L->R	Neu 1	HSPG2_ITGB1	hspg2_itgb1b
12	Mac 7	L->R	Neu 1	ICAM3_ITGB2	si:ch73-208g10.1_itgb2
12	Mac 7	L->R	Neu 1	IL15_IL15RA	il15l_il15ra
12	Mac 7	L->R	Neu 1	IL15_IL2RB	il15l_csf2rb
12	Mac 7	L->R	Neu 1	IL15_IL2RB	il15l_il21r.1
12	Mac 7	L->R	Neu 1	INHBA_ACVR2A	inhbaa_acvr2aa
12	Mac 7	L->R	Neu 1	INHBA_SMAD3	inhbaa_smad3a
12	Mac 7	L->R	Neu 1	KITLG_EPOR	kitlga_il4r.1
12	Mac 7	L->R	Neu 1	LIN7C_ABCA1	lin7c_abca1a
12	Mac 7	L->R	Neu 1	LIN7C_ABCA1	lin7c_abca1b
12	Mac 7	L->R	Neu 1	LTF_TFRC	tfa_tfr1b
12	Mac 7	L->R	Neu 1	MMP1_CD44	mmp13a_cd44b
12	Mac 7	L->R	Neu 1	NAMPT_INSR	nampta_insra
12	Mac 7	L->R	Neu 1	PSEN1_CD44	psen1_cd44b
12	Mac 7	L->R	Neu 1	PSEN1_NOTCH2	psen1_notch2
12	Mac 7	L->R	Neu 1	TNF_TNFRSF1A	tnfa_fas
12	Mac 7	L->R	Neu 1	TNF_TNFRSF1B	tnfa_tnfrsf1b
12	Mac 7	L->R	Neu 1	TNF_TRADD	tnfa_tradd
12	Mac 7	L->R	Neu 1	TNF_TNFRSF1A	tnfb_fas
12	Mac 7	L->R	Neu 1	TNF_TNFRSF1B	tnfb_tnfrsf1b
12	Mac 7	L->R	Neu 1	TNF_TRADD	tnfb_tradd
12	Mac 7	L->R	Neu 1	TNFSF13B_TFRC	tnfsf13b_tfr1b
13	Mac 7	L->R	Neu 2	ADAM28_ITGA4	adam28_itga4
13	Mac 7	L->R	Neu 2	ADAM9_ITGB1	adam9_CABZ01058721.1
13	Mac 7	L->R	Neu 2	CALR_ITGAV	calr_itgav
13	Mac 7	L->R	Neu 2	COL1A2_CD44	col1a2_cd44b
13	Mac 7	L->R	Neu 2	COL1A2_ITGAV	col1a2_itgav
13	Mac 7	L->R	Neu 2	COL1A2_ITGB1	col1a2_CABZ01058721.1
13	Mac 7	L->R	Neu 2	COL1A2_ITGB1	col1a2_itgb1b
13	Mac 7	L->R	Neu 2	F13A1_ITGB1	f13a1b_CABZ01058721.1
13	Mac 7	L->R	Neu 2	FADD_ABCA1	fadd_abca1a
13	Mac 7	L->R	Neu 2	FADD_ABCA1	fadd_abca1b
13	Mac 7	L->R	Neu 2	FADD_TRADD	fadd_tradd
13	Mac 7	L->R	Neu 2	FN1_C5AR1	fn1b_CABZ01041494.1
13	Mac 7	L->R	Neu 2	FN1_CD44	fn1b_cd44b
13	Mac 7	L->R	Neu 2	FN1_ITGA4	fn1b_itga4
13	Mac 7	L->R	Neu 2	FN1_ITGA5	fn1b_itga5
13	Mac 7	L->R	Neu 2	FN1_ITGAV	fn1b_itgav
13	Mac 7	L->R	Neu 2	FN1_ITGB1	fn1b_CABZ01058721.1
13	Mac 7	L->R	Neu 2	FN1_ITGB1	fn1b_itgb1b
13	Mac 7	L->R	Neu 2	FN1_ITGB7	fn1b_itgb7
13	Mac 7	L->R	Neu 2	FN1_ITGA5	fn1a_itga5
13	Mac 7	L->R	Neu 2	FN1_ITGB1	fn1a_CABZ01058721.1
13	Mac 7	L->R	Neu 2	FN1_ITGB7	fn1a_itgb7
13	Mac 7	L->R	Neu 2	HMGB1_AGER	hmgb1b_si:ch211-79k12.1
13	Mac 7	L->R	Neu 2	HMGB1_CXCR4	hmgb1b_cxcr4b
13	Mac 7	L->R	Neu 2	HRAS_INSR	hrasb_insra
13	Mac 7	L->R	Neu 2	HSPG2_ITGB1	hspg2_CABZ01058721.1
13	Mac 7	L->R	Neu 2	HSPG2_ITGB1	hspg2_itgb1b
13	Mac 7	L->R	Neu 2	ICAM3_ITGB2	si:ch73-208g10.1_itgb2
13	Mac 7	L->R	Neu 2	IL15_IL15RA	il15l_il15ra
13	Mac 7	L->R	Neu 2	IL15_IL2RB	il15l_csf2rb
13	Mac 7	L->R	Neu 2	IL15_IL2RB	il15l_il21r.1
13	Mac 7	L->R	Neu 2	IL16_CD4	il16_dicp2.2
13	Mac 7	L->R	Neu 2	INHBA_ACVR2A	inhbaa_acvr2aa
13	Mac 7	L->R	Neu 2	INHBA_SMAD3	inhbaa_smad3a
13	Mac 7	L->R	Neu 2	KITLG_EPOR	kitlga_il4r.1
13	Mac 7	L->R	Neu 2	LAMB1_ITGB1	lamb1b_CABZ01058721.1
13	Mac 7	L->R	Neu 2	LIN7C_ABCA1	lin7c_abca1a
13	Mac 7	L->R	Neu 2	LIN7C_ABCA1	lin7c_abca1b
13	Mac 7	L->R	Neu 2	LTF_TFRC	tfa_tfr1b
13	Mac 7	L->R	Neu 2	MMP1_CD44	mmp13a_cd44b
13	Mac 7	L->R	Neu 2	NAMPT_INSR	nampta_insra
13	Mac 7	L->R	Neu 2	PSEN1_CD44	psen1_cd44b
13	Mac 7	L->R	Neu 2	PSEN1_NOTCH2	psen1_notch2
13	Mac 7	L->R	Neu 2	TIMP2_ITGB1	timp2b_CABZ01058721.1
13	Mac 7	L->R	Neu 2	TNF_TNFRSF1A	tnfa_fas
13	Mac 7	L->R	Neu 2	TNF_TNFRSF1B	tnfa_tnfrsf1b
13	Mac 7	L->R	Neu 2	TNF_TRADD	tnfa_tradd
13	Mac 7	L->R	Neu 2	TNF_TNFRSF1A	tnfb_fas
13	Mac 7	L->R	Neu 2	TNF_TNFRSF1B	tnfb_tnfrsf1b
13	Mac 7	L->R	Neu 2	TNF_TRADD	tnfb_tradd
13	Mac 7	L->R	Neu 2	TNFSF13B_TFRC	tnfsf13b_tfr1b
14	MN	L->R	Neu 1	APP_PTGER2	appa_ptger2a
14	MN	L->R	Neu 1	CXCL9_CXCR3	cxcl11.6_cxcr3.3
14	MN	L->R	Neu 1	CXCL9_CXCR3	cxcl11.5_cxcr3.3
14	MN	L->R	Neu 1	CXCL9_CXCR3	BX323596.1_cxcr3.3
14	MN	L->R	Neu 1	CXCL9_CXCR3	BX323596.2_cxcr3.3
14	MN	L->R	Neu 1	FADD_ABCA1	fadd_abca1a
14	MN	L->R	Neu 1	FADD_ABCA1	fadd_abca1b
14	MN	L->R	Neu 1	FADD_TRADD	fadd_tradd
14	MN	L->R	Neu 1	GNAI2_CXCR3	gnai2b_cxcr3.3
14	MN	L->R	Neu 1	GNAI2_CXCR3	gnai2a_cxcr3.3
14	MN	L->R	Neu 1	HBEGF_CD82	hbegfa_cd82a
14	MN	L->R	Neu 1	HBEGF_CD82	hbegfb_cd82a
14	MN	L->R	Neu 1	HSPG2_ITGB1	hspg2_CABZ01058721.1
14	MN	L->R	Neu 1	HSPG2_ITGB1	hspg2_itgb1b
14	MN	L->R	Neu 1	KITLG_EPOR	kitlga_il4r.1
14	MN	L->R	Neu 1	LAMB1_ITGAV	lamb1b_itgav
14	MN	L->R	Neu 1	LAMB1_ITGB1	lamb1b_CABZ01058721.1
14	MN	L->R	Neu 1	LAMB1_ITGB1	lamb1b_itgb1b
14	MN	L->R	Neu 1	LTF_TFRC	tfa_tfr1b
14	MN	L->R	Neu 1	MFGE8_ITGAV	mfge8a_itgav
14	MN	L->R	Neu 1	MMP1_CD44	mmp13a_cd44b
14	MN	L->R	Neu 1	PSEN1_CD44	psen1_cd44b
14	MN	L->R	Neu 1	PSEN1_NOTCH2	psen1_notch2
15	MN	L->R	Neu 2	ADAM17_ITGA5	adam17a_itga5
15	MN	L->R	Neu 2	ADAM17_ITGB1	adam17a_CABZ01058721.1
15	MN	L->R	Neu 2	ADAM9_ITGB1	adam9_CABZ01058721.1
15	MN	L->R	Neu 2	APP_PTGER2	appa_ptger2b
15	MN	L->R	Neu 2	APP_PTGER2	appa_ptger2a
15	MN	L->R	Neu 2	F13A1_ITGB1	f13a1b_CABZ01058721.1
15	MN	L->R	Neu 2	FADD_ABCA1	fadd_abca1a
15	MN	L->R	Neu 2	FADD_ABCA1	fadd_abca1b
15	MN	L->R	Neu 2	FADD_TRADD	fadd_tradd
15	MN	L->R	Neu 2	HSPG2_ITGB1	hspg2_CABZ01058721.1
15	MN	L->R	Neu 2	HSPG2_ITGB1	hspg2_itgb1b
15	MN	L->R	Neu 2	IL16_CD4	il16_dicp2.2
15	MN	L->R	Neu 2	KITLG_EPOR	kitlga_il4r.1
15	MN	L->R	Neu 2	LAMB1_ITGAV	lamb1b_itgav
15	MN	L->R	Neu 2	LAMB1_ITGB1	lamb1b_CABZ01058721.1
15	MN	L->R	Neu 2	LAMB1_ITGB1	lamb1b_itgb1b
15	MN	L->R	Neu 2	LTF_TFRC	tfa_tfr1b
15	MN	L->R	Neu 2	MFGE8_ITGAV	mfge8a_itgav
15	MN	L->R	Neu 2	MMP1_CD44	mmp13a_cd44b
15	MN	L->R	Neu 2	PSEN1_CD44	psen1_cd44b
15	MN	L->R	Neu 2	PSEN1_NOTCH2	psen1_notch2
15	MN	L->R	Neu 2	TIMP2_ITGB1	timp2b_CABZ01058721.1
16	Mac 8	L->R	Neu 1	ADAM28_ITGA4	adam28_itga4
16	Mac 8	L->R	Neu 1	ADM_GPR84	adma_gpr84
16	Mac 8	L->R	Neu 1	ADM_GPR84	admb_gpr84
16	Mac 8	L->R	Neu 1	APP_PTGER2	appa_ptger2a
16	Mac 8	L->R	Neu 1	BMP6_ACVR2A	bmp6_acvr2aa
16	Mac 8	L->R	Neu 1	CALR_ITGAV	calr_itgav
16	Mac 8	L->R	Neu 1	CSF3_CSF3R	csf3a_csf3r
16	Mac 8	L->R	Neu 1	CSF3_CSF3R	csf3b_csf3r
16	Mac 8	L->R	Neu 1	EDIL3_ITGAV	edil3a_itgav
16	Mac 8	L->R	Neu 1	EPO_EPOR	epoa_il4r.1
16	Mac 8	L->R	Neu 1	GNAI2_ADCY7	gnai2b_adcy7
16	Mac 8	L->R	Neu 1	GNAI2_C5AR1	gnai2b_CABZ01041494.1
16	Mac 8	L->R	Neu 1	GNAI2_CXCR3	gnai2b_cxcr3.3
16	Mac 8	L->R	Neu 1	GNAI2_S1PR4	gnai2b_s1pr4
16	Mac 8	L->R	Neu 1	GNAI2_CXCR3	gnai2a_cxcr3.3
16	Mac 8	L->R	Neu 1	HBEGF_CD82	hbegfa_cd82a
16	Mac 8	L->R	Neu 1	HBEGF_CD44	hbegfb_cd44b
16	Mac 8	L->R	Neu 1	HBEGF_CD82	hbegfb_cd82a
16	Mac 8	L->R	Neu 1	HBEGF_CD82	hbegfb_cd82b
16	Mac 8	L->R	Neu 1	IFNG_IFNGR1	ifng1_ifngr1
16	Mac 8	L->R	Neu 1	IFNG_IFNGR1	ifng1_ifngr1l
16	Mac 8	L->R	Neu 1	IFNG_IFNGR1	ifng1_il10ra
16	Mac 8	L->R	Neu 1	IL16_CD4	il16_dicp1.3-4
16	Mac 8	L->R	Neu 1	IL16_CD4	il16_dicp3.3
16	Mac 8	L->R	Neu 1	IL16_CD4	il16_dicp3.1
16	Mac 8	L->R	Neu 1	LTF_TFRC	tfa_tfr1b
16	Mac 8	L->R	Neu 1	MMP1_CD44	mmp13a_cd44b
16	Mac 8	L->R	Neu 1	NUCB2_ERAP1	nucb2b_erap1b
16	Mac 8	L->R	Neu 1	THBS1_ITGA4	thbs1b_itga4
16	Mac 8	L->R	Neu 1	THBS1_ITGB1	thbs1b_CABZ01058721.1
16	Mac 8	L->R	Neu 1	THBS1_ITGB1	thbs1b_itgb1b
16	Mac 8	L->R	Neu 1	THBS1_SDC4	thbs1b_sdc4
16	Mac 8	L->R	Neu 1	VEGFA_ITGAV	vegfab_itgav
16	Mac 8	L->R	Neu 1	VEGFA_ITGB1	vegfab_CABZ01058721.1
16	Mac 8	L->R	Neu 1	VEGFA_ITGB1	vegfab_itgb1b
17	Mac 8	L->R	Neu 2	ADAM28_ITGA4	adam28_itga4
17	Mac 8	L->R	Neu 2	ADM_GPR84	adma_gpr84
17	Mac 8	L->R	Neu 2	ADM_GPR84	admb_gpr84
17	Mac 8	L->R	Neu 2	APP_PTGER2	appa_ptger2b
17	Mac 8	L->R	Neu 2	APP_PTGER2	appa_ptger2a
17	Mac 8	L->R	Neu 2	BMP6_ACVR2A	bmp6_acvr2aa
17	Mac 8	L->R	Neu 2	CALR_ITGAV	calr_itgav
17	Mac 8	L->R	Neu 2	CCN1_ITGA5	ccn1_itga5
17	Mac 8	L->R	Neu 2	CSF3_CSF3R	csf3a_csf3r
17	Mac 8	L->R	Neu 2	CSF3_CSF3R	csf3b_csf3r
17	Mac 8	L->R	Neu 2	EDIL3_ITGAV	edil3a_itgav
17	Mac 8	L->R	Neu 2	EPO_EPOR	epoa_il4r.1
17	Mac 8	L->R	Neu 2	F13A1_ITGB1	f13a1b_CABZ01058721.1
17	Mac 8	L->R	Neu 2	FN1_ITGA5	fn1b_itga5
17	Mac 8	L->R	Neu 2	FN1_ITGB1	fn1b_CABZ01058721.1
17	Mac 8	L->R	Neu 2	FN1_ITGB7	fn1b_itgb7
17	Mac 8	L->R	Neu 2	FN1_ITGA5	fn1a_itga5
17	Mac 8	L->R	Neu 2	FN1_ITGB1	fn1a_CABZ01058721.1
17	Mac 8	L->R	Neu 2	FN1_ITGB7	fn1a_itgb7
17	Mac 8	L->R	Neu 2	GNAI2_ADCY7	gnai2b_adcy7
17	Mac 8	L->R	Neu 2	GNAI2_C5AR1	gnai2b_CABZ01041494.1
17	Mac 8	L->R	Neu 2	GNAI2_CXCR3	gnai2b_cxcr3.3
17	Mac 8	L->R	Neu 2	GNAI2_S1PR4	gnai2b_s1pr4
17	Mac 8	L->R	Neu 2	HBEGF_CD44	hbegfb_cd44b
17	Mac 8	L->R	Neu 2	HBEGF_CD82	hbegfb_cd82a
17	Mac 8	L->R	Neu 2	HBEGF_CD82	hbegfb_cd82b
17	Mac 8	L->R	Neu 2	IFNG_IFNGR1	ifng1_ifngr1
17	Mac 8	L->R	Neu 2	IFNG_IFNGR1	ifng1_ifngr1l
17	Mac 8	L->R	Neu 2	IFNG_IFNGR1	ifng1_il10ra
17	Mac 8	L->R	Neu 2	IL16_CD4	il16_dicp1.3-4
17	Mac 8	L->R	Neu 2	IL16_CD4	il16_dicp3.3
17	Mac 8	L->R	Neu 2	IL16_CD4	il16_dicp3.1
17	Mac 8	L->R	Neu 2	IL16_CD4	il16_dicp2.2
17	Mac 8	L->R	Neu 2	JAM3_ITGB1	jam3b_CABZ01058721.1
17	Mac 8	L->R	Neu 2	LTF_TFRC	tfa_tfr1b
17	Mac 8	L->R	Neu 2	MDK_ITGB1	mdka_CABZ01058721.1
17	Mac 8	L->R	Neu 2	MMP1_CD44	mmp13a_cd44b
17	Mac 8	L->R	Neu 2	NUCB2_ERAP1	nucb2b_erap1b
17	Mac 8	L->R	Neu 2	THBS1_ITGA4	thbs1b_itga4
17	Mac 8	L->R	Neu 2	THBS1_ITGB1	thbs1b_CABZ01058721.1
17	Mac 8	L->R	Neu 2	THBS1_ITGB1	thbs1b_itgb1b
17	Mac 8	L->R	Neu 2	THBS1_SDC4	thbs1b_sdc4
17	Mac 8	L->R	Neu 2	TIMP2_ITGB1	timp2b_CABZ01058721.1
17	Mac 8	L->R	Neu 2	VEGFA_ITGAV	vegfab_itgav
17	Mac 8	L->R	Neu 2	VEGFA_ITGB1	vegfab_CABZ01058721.1
17	Mac 8	L->R	Neu 2	VEGFA_ITGB1	vegfab_itgb1b
18	Mac 9	L->R	Neu 1	ALOX5AP_ALOX5	alox5ap_alox5a
18	Mac 9	L->R	Neu 1	APP_PTGER2	appa_ptger2a
18	Mac 9	L->R	Neu 1	CXCL12_CD4	cxcl12a_dicp1.3-4
18	Mac 9	L->R	Neu 1	CXCL12_CD4	cxcl12a_dicp3.3
18	Mac 9	L->R	Neu 1	CXCL12_CD4	cxcl12a_dicp3.1
18	Mac 9	L->R	Neu 1	CXCL12_CXCR3	cxcl12a_cxcr3.3
18	Mac 9	L->R	Neu 1	CXCL12_CXCR4	cxcl12a_cxcr4a
18	Mac 9	L->R	Neu 1	CXCL12_CXCR4	cxcl12a_cxcr4b
18	Mac 9	L->R	Neu 1	CXCL12_ITGB1	cxcl12a_CABZ01058721.1
18	Mac 9	L->R	Neu 1	CXCL12_ITGB1	cxcl12a_itgb1b
18	Mac 9	L->R	Neu 1	CXCL12_SDC4	cxcl12a_sdc4
18	Mac 9	L->R	Neu 1	CXCL9_CXCR3	cxcl11.6_cxcr3.3
18	Mac 9	L->R	Neu 1	CXCL9_CXCR3	cxcl11.5_cxcr3.3
18	Mac 9	L->R	Neu 1	CXCL9_CXCR3	BX323596.1_cxcr3.3
18	Mac 9	L->R	Neu 1	CXCL9_CXCR3	BX323596.2_cxcr3.3
18	Mac 9	L->R	Neu 1	F13A1_ITGA4	f13a1b_itga4
18	Mac 9	L->R	Neu 1	F13A1_ITGB1	f13a1b_CABZ01058721.1
18	Mac 9	L->R	Neu 1	F13A1_ITGB1	f13a1b_itgb1b
18	Mac 9	L->R	Neu 1	FN1_C5AR1	fn1a_CABZ01041494.1
18	Mac 9	L->R	Neu 1	FN1_CD44	fn1a_cd44b
18	Mac 9	L->R	Neu 1	FN1_ITGA4	fn1a_itga4
18	Mac 9	L->R	Neu 1	FN1_ITGAV	fn1a_itgav
18	Mac 9	L->R	Neu 1	FN1_ITGB1	fn1a_CABZ01058721.1
18	Mac 9	L->R	Neu 1	FN1_ITGB1	fn1a_itgb1b
18	Mac 9	L->R	Neu 1	GNAI2_CXCR3	gnai2b_cxcr3.3
18	Mac 9	L->R	Neu 1	GNAI2_CXCR3	gnai2a_cxcr3.3
18	Mac 9	L->R	Neu 1	GNAS_ADCY7	gnas_adcy7
18	Mac 9	L->R	Neu 1	GNAS_CRHR1	gnas_crhr1
18	Mac 9	L->R	Neu 1	GRN_SORT1	grn2_sort1b
18	Mac 9	L->R	Neu 1	GRN_TNFRSF1A	grn2_fas
18	Mac 9	L->R	Neu 1	GRN_TNFRSF1B	grn2_tnfrsf1b
18	Mac 9	L->R	Neu 1	HBEGF_CD82	hbegfa_cd82a
18	Mac 9	L->R	Neu 1	ICAM3_ITGB2	si:ch211-66e2.3_itgb2
18	Mac 9	L->R	Neu 1	IL1B_IL1R1	il1b_zmp:0000000936
18	Mac 9	L->R	Neu 1	LMAN1_MCFD2	lman1_mcfd2
18	Mac 9	L->R	Neu 1	MDK_ITGA4	mdka_itga4
18	Mac 9	L->R	Neu 1	MDK_ITGB1	mdka_CABZ01058721.1
18	Mac 9	L->R	Neu 1	MDK_ITGB1	mdka_itgb1b
18	Mac 9	L->R	Neu 1	MDK_SDC4	mdka_sdc4
18	Mac 9	L->R	Neu 1	MMP1_CD44	mmp13a_cd44b
18	Mac 9	L->R	Neu 1	MMP9_CD44	mmp9_cd44b
18	Mac 9	L->R	Neu 1	MMP9_ITGB2	mmp9_itgb2
18	Mac 9	L->R	Neu 1	NGF_KIDINS220	ngfa_kidins220b
18	Mac 9	L->R	Neu 1	NGF_SORT1	ngfa_sort1b
18	Mac 9	L->R	Neu 1	SPINT1_ST14	spint1a_zmp:0000001114
19	Mac 9	L->R	Neu 2	ADAM17_ITGA5	adam17a_itga5
19	Mac 9	L->R	Neu 2	ADAM17_ITGB1	adam17a_CABZ01058721.1
19	Mac 9	L->R	Neu 2	ADAM9_ITGB1	adam9_CABZ01058721.1
19	Mac 9	L->R	Neu 2	ALOX5AP_ALOX5	alox5ap_alox5a
19	Mac 9	L->R	Neu 2	APP_PTGER2	appa_ptger2b
19	Mac 9	L->R	Neu 2	APP_PTGER2	appa_ptger2a
19	Mac 9	L->R	Neu 2	CXCL12_CD4	cxcl12a_dicp1.3-4
19	Mac 9	L->R	Neu 2	CXCL12_CD4	cxcl12a_dicp3.3
19	Mac 9	L->R	Neu 2	CXCL12_CD4	cxcl12a_dicp3.1
19	Mac 9	L->R	Neu 2	CXCL12_CD4	cxcl12a_dicp2.2
19	Mac 9	L->R	Neu 2	CXCL12_CXCR3	cxcl12a_cxcr3.3
19	Mac 9	L->R	Neu 2	CXCL12_CXCR4	cxcl12a_cxcr4b
19	Mac 9	L->R	Neu 2	CXCL12_ITGB1	cxcl12a_CABZ01058721.1
19	Mac 9	L->R	Neu 2	CXCL12_ITGB1	cxcl12a_itgb1b
19	Mac 9	L->R	Neu 2	CXCL12_SDC4	cxcl12a_sdc4
19	Mac 9	L->R	Neu 2	CXCL9_CXCR3	cxcl11.6_cxcr3.3
19	Mac 9	L->R	Neu 2	CXCL9_CXCR3	BX323596.1_cxcr3.3
19	Mac 9	L->R	Neu 2	F13A1_ITGA4	f13a1b_itga4
19	Mac 9	L->R	Neu 2	F13A1_ITGB1	f13a1b_CABZ01058721.1
19	Mac 9	L->R	Neu 2	F13A1_ITGB1	f13a1b_itgb1b
19	Mac 9	L->R	Neu 2	FN1_C5AR1	fn1a_CABZ01041494.1
19	Mac 9	L->R	Neu 2	FN1_CD44	fn1a_cd44b
19	Mac 9	L->R	Neu 2	FN1_ITGA4	fn1a_itga4
19	Mac 9	L->R	Neu 2	FN1_ITGA5	fn1a_itga5
19	Mac 9	L->R	Neu 2	FN1_ITGAV	fn1a_itgav
19	Mac 9	L->R	Neu 2	FN1_ITGB1	fn1a_CABZ01058721.1
19	Mac 9	L->R	Neu 2	FN1_ITGB1	fn1a_itgb1b
19	Mac 9	L->R	Neu 2	FN1_ITGB7	fn1a_itgb7
19	Mac 9	L->R	Neu 2	GNAS_ADCY7	gnas_adcy7
19	Mac 9	L->R	Neu 2	GNAS_CRHR1	gnas_crhr1
19	Mac 9	L->R	Neu 2	GRN_SORT1	grn2_sort1b
19	Mac 9	L->R	Neu 2	GRN_TNFRSF1A	grn2_fas
19	Mac 9	L->R	Neu 2	GRN_TNFRSF1B	grn2_tnfrsf1b
19	Mac 9	L->R	Neu 2	ICAM3_ITGB2	si:ch211-66e2.3_itgb2
19	Mac 9	L->R	Neu 2	IL16_CD4	il16_dicp2.2
19	Mac 9	L->R	Neu 2	IL1B_IL1R1	il1b_CABZ01054965.1
19	Mac 9	L->R	Neu 2	IL1B_IL1R1	il1b_zmp:0000000936
19	Mac 9	L->R	Neu 2	MDK_ITGA4	mdka_itga4
19	Mac 9	L->R	Neu 2	MDK_ITGB1	mdka_CABZ01058721.1
19	Mac 9	L->R	Neu 2	MDK_ITGB1	mdka_itgb1b
19	Mac 9	L->R	Neu 2	MDK_SDC4	mdka_sdc4
19	Mac 9	L->R	Neu 2	MMP1_CD44	mmp13a_cd44b
19	Mac 9	L->R	Neu 2	MMP9_CD44	mmp9_cd44b
19	Mac 9	L->R	Neu 2	MMP9_ITGB2	mmp9_itgb2
19	Mac 9	L->R	Neu 2	NGF_KIDINS220	ngfa_kidins220b
19	Mac 9	L->R	Neu 2	NGF_SORT1	ngfa_sort1b
19	Mac 9	L->R	Neu 2	TIMP2_ITGB1	timp2b_CABZ01058721.1

## Sheet: 3d common
3dpci_Mac-ligand to Neu-receptor
Cluster pair ID	CT1	pair type	CT2	human L-R pair	L-R pair
0	Mac 1	L->R	Neu 1	ADAM10_CD44	adam10a_cd44b
0	Mac 1	L->R	Neu 1	ADAM10_IL6R	adam10a_il6r
0	Mac 1	L->R	Neu 1	ADAM10_NOTCH2	adam10a_notch2
0	Mac 1	L->R	Neu 1	ADAM10_TSPAN14	adam10a_tspan14
0	Mac 1	L->R	Neu 1	ADAM17_IL6R	adam17a_il6r
0	Mac 1	L->R	Neu 1	ADAM17_ITGB1	adam17a_CABZ01058721.1
0	Mac 1	L->R	Neu 1	ADAM17_ITGB1	adam17a_itgb1b
0	Mac 1	L->R	Neu 1	ADAM28_ITGA4	adam28_itga4
0	Mac 1	L->R	Neu 1	ADAM9_ITGAV	adam9_itgav
0	Mac 1	L->R	Neu 1	ADAM9_ITGB1	adam9_CABZ01058721.1
0	Mac 1	L->R	Neu 1	ADAM9_ITGB1	adam9_itgb1b
0	Mac 1	L->R	Neu 1	ADM_GPR84	adma_gpr84
0	Mac 1	L->R	Neu 1	AFDN_F11R	afdna_f11r.1
0	Mac 1	L->R	Neu 1	AGTRAP_RACK1	agtrap_rack1
0	Mac 1	L->R	Neu 1	ALOX5AP_ALOX5	alox5ap_alox5a
0	Mac 1	L->R	Neu 1	APOE_ABCA1	apoeb_abca1a
0	Mac 1	L->R	Neu 1	APOE_ABCA1	apoeb_abca1b
0	Mac 1	L->R	Neu 1	APP_AGER	appa_si:ch211-79k12.1
0	Mac 1	L->R	Neu 1	APP_APLP2	appa_aplp2
0	Mac 1	L->R	Neu 1	APP_CD74	appa_cd74a
0	Mac 1	L->R	Neu 1	APP_CD74	appa_cd74b
0	Mac 1	L->R	Neu 1	APP_LRP10	appa_lrp10
0	Mac 1	L->R	Neu 1	APP_NOTCH2	appa_notch2
0	Mac 1	L->R	Neu 1	APP_RPSA	appa_rpsa
0	Mac 1	L->R	Neu 1	APP_AGER	appb_si:ch211-79k12.1
0	Mac 1	L->R	Neu 1	APP_APLP2	appb_aplp2
0	Mac 1	L->R	Neu 1	APP_CD74	appb_cd74a
0	Mac 1	L->R	Neu 1	APP_CD74	appb_cd74b
0	Mac 1	L->R	Neu 1	APP_LRP10	appb_lrp10
0	Mac 1	L->R	Neu 1	APP_NOTCH2	appb_notch2
0	Mac 1	L->R	Neu 1	APP_RPSA	appb_rpsa
0	Mac 1	L->R	Neu 1	ARF6_SMAP1	arf6a_smap1
0	Mac 1	L->R	Neu 1	ARF6_SMAP1	arf6b_smap1
0	Mac 1	L->R	Neu 1	BSG_SELE	bsg_selp
0	Mac 1	L->R	Neu 1	CALM2_ABCA1	calm3a_abca1a
0	Mac 1	L->R	Neu 1	CALM2_ABCA1	calm3a_abca1b
0	Mac 1	L->R	Neu 1	CALM2_INSR	calm3a_insra
0	Mac 1	L->R	Neu 1	CALM2_KCNQ5	calm3a_kcnq5b
0	Mac 1	L->R	Neu 1	CALM2_ABCA1	calm2a_abca1a
0	Mac 1	L->R	Neu 1	CALM2_ABCA1	calm2a_abca1b
0	Mac 1	L->R	Neu 1	CALM2_INSR	calm2a_insra
0	Mac 1	L->R	Neu 1	CALM2_KCNQ5	calm2a_kcnq5b
0	Mac 1	L->R	Neu 1	CALR_ITGAV	calr_itgav
0	Mac 1	L->R	Neu 1	CD99_CD81	cd99_cd81a
0	Mac 1	L->R	Neu 1	F13A1_ITGA4	f13a1b_itga4
0	Mac 1	L->R	Neu 1	F13A1_ITGB1	f13a1b_CABZ01058721.1
0	Mac 1	L->R	Neu 1	F13A1_ITGB1	f13a1b_itgb1b
0	Mac 1	L->R	Neu 1	FN1_C5AR1	fn1a_CABZ01041494.1
0	Mac 1	L->R	Neu 1	FN1_CD44	fn1a_cd44b
0	Mac 1	L->R	Neu 1	FN1_ITGA4	fn1a_itga4
0	Mac 1	L->R	Neu 1	FN1_ITGAV	fn1a_itgav
0	Mac 1	L->R	Neu 1	FN1_ITGB1	fn1a_CABZ01058721.1
0	Mac 1	L->R	Neu 1	FN1_ITGB1	fn1a_itgb1b
0	Mac 1	L->R	Neu 1	GNAI2_ADCY7	gnai2b_adcy7
0	Mac 1	L->R	Neu 1	GNAI2_C5AR1	gnai2b_CABZ01041494.1
0	Mac 1	L->R	Neu 1	GNAI2_S1PR4	gnai2b_s1pr4
0	Mac 1	L->R	Neu 1	GNAI2_ADCY7	gnai2a_adcy7
0	Mac 1	L->R	Neu 1	GNAI2_C5AR1	gnai2a_CABZ01041494.1
0	Mac 1	L->R	Neu 1	GNAI2_S1PR4	gnai2a_s1pr4
0	Mac 1	L->R	Neu 1	GNAS_ADCY7	gnas_adcy7
0	Mac 1	L->R	Neu 1	GNAS_CRHR1	gnas_crhr1
0	Mac 1	L->R	Neu 1	GPI_AMFR	gpia_amfra
0	Mac 1	L->R	Neu 1	GRN_SORT1	grn1_sort1b
0	Mac 1	L->R	Neu 1	GRN_TNFRSF1A	grn1_fas
0	Mac 1	L->R	Neu 1	GRN_TNFRSF1B	grn1_tnfrsf1b
0	Mac 1	L->R	Neu 1	GRN_SORT1	grn2_sort1b
0	Mac 1	L->R	Neu 1	GRN_TNFRSF1A	grn2_fas
0	Mac 1	L->R	Neu 1	GRN_TNFRSF1B	grn2_tnfrsf1b
0	Mac 1	L->R	Neu 1	HBEGF_CD44	hbegfa_cd44b
0	Mac 1	L->R	Neu 1	HBEGF_CD82	hbegfa_cd82b
0	Mac 1	L->R	Neu 1	HBEGF_CD44	hbegfb_cd44b
0	Mac 1	L->R	Neu 1	HBEGF_CD82	hbegfb_cd82b
0	Mac 1	L->R	Neu 1	HMGB1_AGER	hmgb1a_si:ch211-79k12.1
0	Mac 1	L->R	Neu 1	HMGB1_CXCR4	hmgb1a_cxcr4a
0	Mac 1	L->R	Neu 1	HMGB1_CXCR4	hmgb1a_cxcr4b
0	Mac 1	L->R	Neu 1	HSPG2_ITGB1	hspg2_CABZ01058721.1
0	Mac 1	L->R	Neu 1	HSPG2_ITGB1	hspg2_itgb1b
0	Mac 1	L->R	Neu 1	ICAM3_ITGB2	si:ch211-66e2.3_itgb2
0	Mac 1	L->R	Neu 1	ICAM3_ITGB2	icam3_itgb2
0	Mac 1	L->R	Neu 1	IGF2_IGF2R	igf2b_igf2r
0	Mac 1	L->R	Neu 1	IGF2_INSR	igf2b_insra
0	Mac 1	L->R	Neu 1	IL16_CD4	il16_dicp1.3-4
0	Mac 1	L->R	Neu 1	IL16_CD4	il16_dicp3.3
0	Mac 1	L->R	Neu 1	IL16_CD4	il16_dicp3.1
0	Mac 1	L->R	Neu 1	IL1B_IL1R1	il1b_zmp:0000000936
0	Mac 1	L->R	Neu 1	LAMB1_ITGAV	lamb1b_itgav
0	Mac 1	L->R	Neu 1	LAMB1_ITGB1	lamb1b_CABZ01058721.1
0	Mac 1	L->R	Neu 1	LAMB1_ITGB1	lamb1b_itgb1b
0	Mac 1	L->R	Neu 1	LIN7C_ABCA1	lin7c_abca1a
0	Mac 1	L->R	Neu 1	LIN7C_ABCA1	lin7c_abca1b
0	Mac 1	L->R	Neu 1	LPL_CD44	lpl_cd44b
0	Mac 1	L->R	Neu 1	LRPAP1_SORT1	lrpap1_sort1b
0	Mac 1	L->R	Neu 1	LTF_TFRC	tfa_tfr1b
0	Mac 1	L->R	Neu 1	MFGE8_ITGAV	mfge8a_itgav
0	Mac 1	L->R	Neu 1	MFGE8_ITGAV	mfge8b_itgav
0	Mac 1	L->R	Neu 1	MFNG_NOTCH2	mfng_notch2
0	Mac 1	L->R	Neu 1	MIF_CD44	mif_cd44b
0	Mac 1	L->R	Neu 1	MIF_CD74	mif_cd74a
0	Mac 1	L->R	Neu 1	MIF_CD74	mif_cd74b
0	Mac 1	L->R	Neu 1	MIF_CXCR4	mif_cxcr4a
0	Mac 1	L->R	Neu 1	MIF_CXCR4	mif_cxcr4b
0	Mac 1	L->R	Neu 1	MMP9_CD44	mmp9_cd44b
0	Mac 1	L->R	Neu 1	MMP9_ITGB2	mmp9_itgb2
0	Mac 1	L->R	Neu 1	NUCB2_ERAP1	nucb2a_erap1b
0	Mac 1	L->R	Neu 1	NUCB2_ERAP1	nucb2b_erap1b
0	Mac 1	L->R	Neu 1	PDGFB_ITGAV	pdgfba_itgav
0	Mac 1	L->R	Neu 1	PKM_CD44	pkma_cd44b
0	Mac 1	L->R	Neu 1	PLTP_ABCA1	pltp_abca1a
0	Mac 1	L->R	Neu 1	PLTP_ABCA1	pltp_abca1b
0	Mac 1	L->R	Neu 1	PSAP_SORT1	psap_sort1b
0	Mac 1	L->R	Neu 1	PSEN1_CD44	psen1_cd44b
0	Mac 1	L->R	Neu 1	PSEN1_NOTCH2	psen1_notch2
0	Mac 1	L->R	Neu 1	RPS19_C5AR1	rps19_CABZ01041494.1
0	Mac 1	L->R	Neu 1	SERPINE1_ITGAV	serpine1_itgav
0	Mac 1	L->R	Neu 1	TIMP2_CD44	timp2b_cd44b
0	Mac 1	L->R	Neu 1	TIMP2_ITGB1	timp2b_CABZ01058721.1
0	Mac 1	L->R	Neu 1	TIMP2_ITGB1	timp2b_itgb1b
0	Mac 1	L->R	Neu 1	TNF_TNFRSF1A	tnfb_fas
0	Mac 1	L->R	Neu 1	TNF_TNFRSF1B	tnfb_tnfrsf1b
0	Mac 1	L->R	Neu 1	TNF_TRADD	tnfb_tradd
0	Mac 1	L->R	Neu 1	UBA52_TGFBR1	uba52_tgfbr1b
1	Mac 1	L->R	Neu 2	ADAM10_CD44	adam10a_cd44b
1	Mac 1	L->R	Neu 2	ADAM10_IL6R	adam10a_il6r
1	Mac 1	L->R	Neu 2	ADAM10_NOTCH2	adam10a_notch2
1	Mac 1	L->R	Neu 2	ADAM10_TSPAN14	adam10a_tspan14
1	Mac 1	L->R	Neu 2	ADAM17_IL6R	adam17a_il6r
1	Mac 1	L->R	Neu 2	ADAM17_ITGB1	adam17a_itgb1b
1	Mac 1	L->R	Neu 2	ADAM28_ITGA4	adam28_itga4
1	Mac 1	L->R	Neu 2	ADAM9_ITGAV	adam9_itgav
1	Mac 1	L->R	Neu 2	ADAM9_ITGB1	adam9_itgb1b
1	Mac 1	L->R	Neu 2	ADM_GPR84	adma_gpr84
1	Mac 1	L->R	Neu 2	AFDN_F11R	afdna_f11r.1
1	Mac 1	L->R	Neu 2	AGTRAP_RACK1	agtrap_rack1
1	Mac 1	L->R	Neu 2	ALOX5AP_ALOX5	alox5ap_alox5a
1	Mac 1	L->R	Neu 2	APOE_ABCA1	apoeb_abca1a
1	Mac 1	L->R	Neu 2	APOE_ABCA1	apoeb_abca1b
1	Mac 1	L->R	Neu 2	APP_AGER	appa_si:ch211-79k12.1
1	Mac 1	L->R	Neu 2	APP_APLP2	appa_aplp2
1	Mac 1	L->R	Neu 2	APP_CD74	appa_cd74a
1	Mac 1	L->R	Neu 2	APP_CD74	appa_cd74b
1	Mac 1	L->R	Neu 2	APP_LRP10	appa_lrp10
1	Mac 1	L->R	Neu 2	APP_NOTCH2	appa_notch2
1	Mac 1	L->R	Neu 2	APP_RPSA	appa_rpsa
1	Mac 1	L->R	Neu 2	APP_AGER	appb_si:ch211-79k12.1
1	Mac 1	L->R	Neu 2	APP_APLP2	appb_aplp2
1	Mac 1	L->R	Neu 2	APP_CD74	appb_cd74a
1	Mac 1	L->R	Neu 2	APP_CD74	appb_cd74b
1	Mac 1	L->R	Neu 2	APP_LRP10	appb_lrp10
1	Mac 1	L->R	Neu 2	APP_NOTCH2	appb_notch2
1	Mac 1	L->R	Neu 2	APP_RPSA	appb_rpsa
1	Mac 1	L->R	Neu 2	ARF6_SMAP1	arf6a_smap1
1	Mac 1	L->R	Neu 2	ARF6_SMAP1	arf6b_smap1
1	Mac 1	L->R	Neu 2	BSG_SELE	bsg_selp
1	Mac 1	L->R	Neu 2	CALM2_ABCA1	calm3a_abca1a
1	Mac 1	L->R	Neu 2	CALM2_ABCA1	calm3a_abca1b
1	Mac 1	L->R	Neu 2	CALM2_INSR	calm3a_insra
1	Mac 1	L->R	Neu 2	CALM2_KCNQ5	calm3a_kcnq5b
1	Mac 1	L->R	Neu 2	CALM2_ABCA1	calm2a_abca1a
1	Mac 1	L->R	Neu 2	CALM2_ABCA1	calm2a_abca1b
1	Mac 1	L->R	Neu 2	CALM2_INSR	calm2a_insra
1	Mac 1	L->R	Neu 2	CALM2_KCNQ5	calm2a_kcnq5b
1	Mac 1	L->R	Neu 2	CALR_ITGAV	calr_itgav
1	Mac 1	L->R	Neu 2	CD99_CD81	cd99_cd81a
1	Mac 1	L->R	Neu 2	CXCL9_CXCR3	BX323596.2_cxcr3.3
1	Mac 1	L->R	Neu 2	F13A1_ITGA4	f13a1b_itga4
1	Mac 1	L->R	Neu 2	F13A1_ITGB1	f13a1b_itgb1b
1	Mac 1	L->R	Neu 2	FN1_C5AR1	fn1a_CABZ01041494.1
1	Mac 1	L->R	Neu 2	FN1_CD44	fn1a_cd44b
1	Mac 1	L->R	Neu 2	FN1_ITGA4	fn1a_itga4
1	Mac 1	L->R	Neu 2	FN1_ITGAV	fn1a_itgav
1	Mac 1	L->R	Neu 2	FN1_ITGB1	fn1a_itgb1b
1	Mac 1	L->R	Neu 2	GNAI2_ADCY7	gnai2b_adcy7
1	Mac 1	L->R	Neu 2	GNAI2_C5AR1	gnai2b_CABZ01041494.1
1	Mac 1	L->R	Neu 2	GNAI2_CXCR3	gnai2b_cxcr3.3
1	Mac 1	L->R	Neu 2	GNAI2_S1PR4	gnai2b_s1pr4
1	Mac 1	L->R	Neu 2	GNAI2_ADCY7	gnai2a_adcy7
1	Mac 1	L->R	Neu 2	GNAI2_C5AR1	gnai2a_CABZ01041494.1
1	Mac 1	L->R	Neu 2	GNAI2_CXCR3	gnai2a_cxcr3.3
1	Mac 1	L->R	Neu 2	GNAI2_S1PR4	gnai2a_s1pr4
1	Mac 1	L->R	Neu 2	GNAS_ADCY7	gnas_adcy7
1	Mac 1	L->R	Neu 2	GNAS_CRHR1	gnas_crhr1
1	Mac 1	L->R	Neu 2	GPI_AMFR	gpia_amfra
1	Mac 1	L->R	Neu 2	GRN_SORT1	grn1_sort1b
1	Mac 1	L->R	Neu 2	GRN_TNFRSF1A	grn1_fas
1	Mac 1	L->R	Neu 2	GRN_TNFRSF1B	grn1_tnfrsf1b
1	Mac 1	L->R	Neu 2	GRN_SORT1	grn2_sort1b
1	Mac 1	L->R	Neu 2	GRN_TNFRSF1A	grn2_fas
1	Mac 1	L->R	Neu 2	GRN_TNFRSF1B	grn2_tnfrsf1b
1	Mac 1	L->R	Neu 2	HBEGF_CD44	hbegfa_cd44b
1	Mac 1	L->R	Neu 2	HBEGF_CD82	hbegfa_cd82a
1	Mac 1	L->R	Neu 2	HBEGF_CD82	hbegfa_cd82b
1	Mac 1	L->R	Neu 2	HBEGF_CD44	hbegfb_cd44b
1	Mac 1	L->R	Neu 2	HBEGF_CD82	hbegfb_cd82a
1	Mac 1	L->R	Neu 2	HBEGF_CD82	hbegfb_cd82b
1	Mac 1	L->R	Neu 2	HMGB1_AGER	hmgb1a_si:ch211-79k12.1
1	Mac 1	L->R	Neu 2	HMGB1_CXCR4	hmgb1a_cxcr4b
1	Mac 1	L->R	Neu 2	HSPG2_ITGB1	hspg2_itgb1b
1	Mac 1	L->R	Neu 2	ICAM3_ITGB2	si:ch211-66e2.3_itgb2
1	Mac 1	L->R	Neu 2	ICAM3_ITGB2	icam3_itgb2
1	Mac 1	L->R	Neu 2	IGF2_IGF2R	igf2b_igf2r
1	Mac 1	L->R	Neu 2	IGF2_INSR	igf2b_insra
1	Mac 1	L->R	Neu 2	IL16_CD4	il16_dicp1.3-4
1	Mac 1	L->R	Neu 2	IL16_CD4	il16_dicp3.3
1	Mac 1	L->R	Neu 2	IL16_CD4	il16_dicp3.1
1	Mac 1	L->R	Neu 2	IL1B_IL1R1	il1b_CABZ01054965.1
1	Mac 1	L->R	Neu 2	IL1B_IL1R1	il1b_zmp:0000000936
1	Mac 1	L->R	Neu 2	LAMB1_ITGAV	lamb1b_itgav
1	Mac 1	L->R	Neu 2	LAMB1_ITGB1	lamb1b_itgb1b
1	Mac 1	L->R	Neu 2	LIN7C_ABCA1	lin7c_abca1a
1	Mac 1	L->R	Neu 2	LIN7C_ABCA1	lin7c_abca1b
1	Mac 1	L->R	Neu 2	LPL_CD44	lpl_cd44b
1	Mac 1	L->R	Neu 2	LRPAP1_SORT1	lrpap1_sort1b
1	Mac 1	L->R	Neu 2	LTF_TFRC	tfa_tfr1b
1	Mac 1	L->R	Neu 2	MFGE8_ITGAV	mfge8a_itgav
1	Mac 1	L->R	Neu 2	MFGE8_ITGAV	mfge8b_itgav
1	Mac 1	L->R	Neu 2	MFNG_NOTCH2	mfng_notch2
1	Mac 1	L->R	Neu 2	MIF_CD44	mif_cd44b
1	Mac 1	L->R	Neu 2	MIF_CD74	mif_cd74a
1	Mac 1	L->R	Neu 2	MIF_CD74	mif_cd74b
1	Mac 1	L->R	Neu 2	MIF_CXCR4	mif_cxcr4b
1	Mac 1	L->R	Neu 2	MMP9_CD44	mmp9_cd44b
1	Mac 1	L->R	Neu 2	MMP9_ITGB2	mmp9_itgb2
1	Mac 1	L->R	Neu 2	NUCB2_ERAP1	nucb2a_erap1b
1	Mac 1	L->R	Neu 2	NUCB2_ERAP1	nucb2b_erap1b
1	Mac 1	L->R	Neu 2	PDGFB_ITGAV	pdgfba_itgav
1	Mac 1	L->R	Neu 2	PKM_CD44	pkma_cd44b
1	Mac 1	L->R	Neu 2	PLTP_ABCA1	pltp_abca1a
1	Mac 1	L->R	Neu 2	PLTP_ABCA1	pltp_abca1b
1	Mac 1	L->R	Neu 2	PSAP_SORT1	psap_sort1b
1	Mac 1	L->R	Neu 2	PSEN1_CD44	psen1_cd44b
1	Mac 1	L->R	Neu 2	PSEN1_NOTCH2	psen1_notch2
1	Mac 1	L->R	Neu 2	RPS19_C5AR1	rps19_CABZ01041494.1
1	Mac 1	L->R	Neu 2	SERPINE1_ITGAV	serpine1_itgav
1	Mac 1	L->R	Neu 2	TIMP2_CD44	timp2b_cd44b
1	Mac 1	L->R	Neu 2	TIMP2_ITGB1	timp2b_itgb1b
1	Mac 1	L->R	Neu 2	TNF_TNFRSF1A	tnfb_fas
1	Mac 1	L->R	Neu 2	TNF_TNFRSF1B	tnfb_tnfrsf1b
1	Mac 1	L->R	Neu 2	TNF_TRADD	tnfb_tradd
2	Mac 2	L->R	Neu 1	ADAM10_CD44	adam10a_cd44b
2	Mac 2	L->R	Neu 1	ADAM10_IL6R	adam10a_il6r
2	Mac 2	L->R	Neu 1	ADAM10_NOTCH2	adam10a_notch2
2	Mac 2	L->R	Neu 1	ADAM10_TSPAN14	adam10a_tspan14
2	Mac 2	L->R	Neu 1	ADAM17_IL6R	adam17a_il6r
2	Mac 2	L->R	Neu 1	ADAM17_ITGB1	adam17a_CABZ01058721.1
2	Mac 2	L->R	Neu 1	ADAM17_ITGB1	adam17a_itgb1b
2	Mac 2	L->R	Neu 1	ADAM28_ITGA4	adam28_itga4
2	Mac 2	L->R	Neu 1	ADAM9_ITGAV	adam9_itgav
2	Mac 2	L->R	Neu 1	ADAM9_ITGB1	adam9_CABZ01058721.1
2	Mac 2	L->R	Neu 1	ADAM9_ITGB1	adam9_itgb1b
2	Mac 2	L->R	Neu 1	AGTRAP_RACK1	agtrap_rack1
2	Mac 2	L->R	Neu 1	ALOX5AP_ALOX5	alox5ap_alox5a
2	Mac 2	L->R	Neu 1	APOE_ABCA1	apoeb_abca1a
2	Mac 2	L->R	Neu 1	APOE_ABCA1	apoeb_abca1b
2	Mac 2	L->R	Neu 1	APP_AGER	appa_si:ch211-79k12.1
2	Mac 2	L->R	Neu 1	APP_APLP2	appa_aplp2
2	Mac 2	L->R	Neu 1	APP_CD74	appa_cd74a
2	Mac 2	L->R	Neu 1	APP_CD74	appa_cd74b
2	Mac 2	L->R	Neu 1	APP_LRP10	appa_lrp10
2	Mac 2	L->R	Neu 1	APP_NOTCH2	appa_notch2
2	Mac 2	L->R	Neu 1	APP_RPSA	appa_rpsa
2	Mac 2	L->R	Neu 1	ARF6_SMAP1	arf6a_smap1
2	Mac 2	L->R	Neu 1	ARF6_SMAP1	arf6b_smap1
2	Mac 2	L->R	Neu 1	BSG_SELE	bsg_selp
2	Mac 2	L->R	Neu 1	CALM2_ABCA1	calm3a_abca1a
2	Mac 2	L->R	Neu 1	CALM2_ABCA1	calm3a_abca1b
2	Mac 2	L->R	Neu 1	CALM2_INSR	calm3a_insra
2	Mac 2	L->R	Neu 1	CALM2_KCNQ5	calm3a_kcnq5b
2	Mac 2	L->R	Neu 1	CALM2_ABCA1	calm2a_abca1a
2	Mac 2	L->R	Neu 1	CALM2_ABCA1	calm2a_abca1b
2	Mac 2	L->R	Neu 1	CALM2_INSR	calm2a_insra
2	Mac 2	L->R	Neu 1	CALM2_KCNQ5	calm2a_kcnq5b
2	Mac 2	L->R	Neu 1	CALR_ITGAV	calr_itgav
2	Mac 2	L->R	Neu 1	CD99_CD81	cd99_cd81a
2	Mac 2	L->R	Neu 1	F13A1_ITGA4	f13a1b_itga4
2	Mac 2	L->R	Neu 1	F13A1_ITGB1	f13a1b_CABZ01058721.1
2	Mac 2	L->R	Neu 1	F13A1_ITGB1	f13a1b_itgb1b
2	Mac 2	L->R	Neu 1	FN1_C5AR1	fn1a_CABZ01041494.1
2	Mac 2	L->R	Neu 1	FN1_CD44	fn1a_cd44b
2	Mac 2	L->R	Neu 1	FN1_ITGA4	fn1a_itga4
2	Mac 2	L->R	Neu 1	FN1_ITGAV	fn1a_itgav
2	Mac 2	L->R	Neu 1	FN1_ITGB1	fn1a_CABZ01058721.1
2	Mac 2	L->R	Neu 1	FN1_ITGB1	fn1a_itgb1b
2	Mac 2	L->R	Neu 1	GNAI2_ADCY7	gnai2b_adcy7
2	Mac 2	L->R	Neu 1	GNAI2_C5AR1	gnai2b_CABZ01041494.1
2	Mac 2	L->R	Neu 1	GNAI2_S1PR4	gnai2b_s1pr4
2	Mac 2	L->R	Neu 1	GNAI2_ADCY7	gnai2a_adcy7
2	Mac 2	L->R	Neu 1	GNAI2_C5AR1	gnai2a_CABZ01041494.1
2	Mac 2	L->R	Neu 1	GNAI2_S1PR4	gnai2a_s1pr4
2	Mac 2	L->R	Neu 1	GNAS_ADCY7	gnas_adcy7
2	Mac 2	L->R	Neu 1	GNAS_CRHR1	gnas_crhr1
2	Mac 2	L->R	Neu 1	GPI_AMFR	gpia_amfra
2	Mac 2	L->R	Neu 1	GRN_SORT1	grn1_sort1b
2	Mac 2	L->R	Neu 1	GRN_TNFRSF1A	grn1_fas
2	Mac 2	L->R	Neu 1	GRN_TNFRSF1B	grn1_tnfrsf1b
2	Mac 2	L->R	Neu 1	GRN_SORT1	grn2_sort1b
2	Mac 2	L->R	Neu 1	GRN_TNFRSF1A	grn2_fas
2	Mac 2	L->R	Neu 1	GRN_TNFRSF1B	grn2_tnfrsf1b
2	Mac 2	L->R	Neu 1	HBEGF_CD44	hbegfa_cd44b
2	Mac 2	L->R	Neu 1	HBEGF_CD82	hbegfa_cd82b
2	Mac 2	L->R	Neu 1	HBEGF_CD44	hbegfb_cd44b
2	Mac 2	L->R	Neu 1	HBEGF_CD82	hbegfb_cd82b
2	Mac 2	L->R	Neu 1	HMGB1_AGER	hmgb1a_si:ch211-79k12.1
2	Mac 2	L->R	Neu 1	HMGB1_CXCR4	hmgb1a_cxcr4a
2	Mac 2	L->R	Neu 1	HMGB1_CXCR4	hmgb1a_cxcr4b
2	Mac 2	L->R	Neu 1	HSPG2_ITGB1	hspg2_CABZ01058721.1
2	Mac 2	L->R	Neu 1	HSPG2_ITGB1	hspg2_itgb1b
2	Mac 2	L->R	Neu 1	ICAM3_ITGB2	si:ch211-66e2.3_itgb2
2	Mac 2	L->R	Neu 1	ICAM3_ITGB2	si:ch73-208g10.1_itgb2
2	Mac 2	L->R	Neu 1	ICAM3_ITGB2	icam3_itgb2
2	Mac 2	L->R	Neu 1	IGF2_IGF2R	igf2b_igf2r
2	Mac 2	L->R	Neu 1	IGF2_INSR	igf2b_insra
2	Mac 2	L->R	Neu 1	IL16_CD4	il16_dicp1.3-4
2	Mac 2	L->R	Neu 1	IL16_CD4	il16_dicp3.3
2	Mac 2	L->R	Neu 1	IL16_CD4	il16_dicp3.1
2	Mac 2	L->R	Neu 1	IL1B_IL1R1	il1b_zmp:0000000936
2	Mac 2	L->R	Neu 1	INHBA_ACVR2A	inhbaa_acvr2aa
2	Mac 2	L->R	Neu 1	INHBA_SMAD3	inhbaa_smad3a
2	Mac 2	L->R	Neu 1	LRPAP1_SORT1	lrpap1_sort1b
2	Mac 2	L->R	Neu 1	LTF_TFRC	tfa_tfr1b
2	Mac 2	L->R	Neu 1	MDK_ITGA4	mdka_itga4
2	Mac 2	L->R	Neu 1	MDK_ITGB1	mdka_CABZ01058721.1
2	Mac 2	L->R	Neu 1	MDK_ITGB1	mdka_itgb1b
2	Mac 2	L->R	Neu 1	MDK_SDC4	mdka_sdc4
2	Mac 2	L->R	Neu 1	MFNG_NOTCH2	mfng_notch2
2	Mac 2	L->R	Neu 1	MIF_CD44	mif_cd44b
2	Mac 2	L->R	Neu 1	MIF_CD74	mif_cd74a
2	Mac 2	L->R	Neu 1	MIF_CD74	mif_cd74b
2	Mac 2	L->R	Neu 1	MIF_CXCR4	mif_cxcr4a
2	Mac 2	L->R	Neu 1	MIF_CXCR4	mif_cxcr4b
2	Mac 2	L->R	Neu 1	MMP1_CD44	mmp13a_cd44b
2	Mac 2	L->R	Neu 1	MMP9_CD44	mmp9_cd44b
2	Mac 2	L->R	Neu 1	MMP9_ITGB2	mmp9_itgb2
2	Mac 2	L->R	Neu 1	NAMPT_INSR	nampta_insra
2	Mac 2	L->R	Neu 1	NUCB2_ERAP1	nucb2a_erap1b
2	Mac 2	L->R	Neu 1	PDGFB_ITGAV	pdgfba_itgav
2	Mac 2	L->R	Neu 1	PKM_CD44	pkma_cd44b
2	Mac 2	L->R	Neu 1	PSAP_SORT1	psap_sort1b
2	Mac 2	L->R	Neu 1	RPS19_C5AR1	rps19_CABZ01041494.1
2	Mac 2	L->R	Neu 1	SERPINE1_ITGAV	serpine1_itgav
2	Mac 2	L->R	Neu 1	TIMP2_CD44	timp2b_cd44b
2	Mac 2	L->R	Neu 1	TIMP2_ITGB1	timp2b_CABZ01058721.1
2	Mac 2	L->R	Neu 1	TIMP2_ITGB1	timp2b_itgb1b
2	Mac 2	L->R	Neu 1	TNF_TNFRSF1A	tnfb_fas
2	Mac 2	L->R	Neu 1	TNF_TNFRSF1B	tnfb_tnfrsf1b
2	Mac 2	L->R	Neu 1	TNF_TRADD	tnfb_tradd
2	Mac 2	L->R	Neu 1	UBA52_TGFBR1	uba52_tgfbr1b
3	Mac 2	L->R	Neu 2	ADAM10_CD44	adam10a_cd44b
3	Mac 2	L->R	Neu 2	ADAM10_IL6R	adam10a_il6r
3	Mac 2	L->R	Neu 2	ADAM10_NOTCH2	adam10a_notch2
3	Mac 2	L->R	Neu 2	ADAM10_TSPAN14	adam10a_tspan14
3	Mac 2	L->R	Neu 2	ADAM17_IL6R	adam17a_il6r
3	Mac 2	L->R	Neu 2	ADAM17_ITGB1	adam17a_itgb1b
3	Mac 2	L->R	Neu 2	ADAM28_ITGA4	adam28_itga4
3	Mac 2	L->R	Neu 2	ADAM9_ITGAV	adam9_itgav
3	Mac 2	L->R	Neu 2	ADAM9_ITGB1	adam9_itgb1b
3	Mac 2	L->R	Neu 2	AGTRAP_RACK1	agtrap_rack1
3	Mac 2	L->R	Neu 2	ALOX5AP_ALOX5	alox5ap_alox5a
3	Mac 2	L->R	Neu 2	APOE_ABCA1	apoeb_abca1a
3	Mac 2	L->R	Neu 2	APOE_ABCA1	apoeb_abca1b
3	Mac 2	L->R	Neu 2	APP_AGER	appa_si:ch211-79k12.1
3	Mac 2	L->R	Neu 2	APP_APLP2	appa_aplp2
3	Mac 2	L->R	Neu 2	APP_CD74	appa_cd74a
3	Mac 2	L->R	Neu 2	APP_CD74	appa_cd74b
3	Mac 2	L->R	Neu 2	APP_LRP10	appa_lrp10
3	Mac 2	L->R	Neu 2	APP_NOTCH2	appa_notch2
3	Mac 2	L->R	Neu 2	APP_RPSA	appa_rpsa
3	Mac 2	L->R	Neu 2	ARF6_SMAP1	arf6a_smap1
3	Mac 2	L->R	Neu 2	ARF6_SMAP1	arf6b_smap1
3	Mac 2	L->R	Neu 2	BSG_SELE	bsg_selp
3	Mac 2	L->R	Neu 2	CALM2_ABCA1	calm3a_abca1a
3	Mac 2	L->R	Neu 2	CALM2_ABCA1	calm3a_abca1b
3	Mac 2	L->R	Neu 2	CALM2_INSR	calm3a_insra
3	Mac 2	L->R	Neu 2	CALM2_KCNQ5	calm3a_kcnq5b
3	Mac 2	L->R	Neu 2	CALM2_ABCA1	calm2a_abca1a
3	Mac 2	L->R	Neu 2	CALM2_ABCA1	calm2a_abca1b
3	Mac 2	L->R	Neu 2	CALM2_INSR	calm2a_insra
3	Mac 2	L->R	Neu 2	CALM2_KCNQ5	calm2a_kcnq5b
3	Mac 2	L->R	Neu 2	CALR_ITGAV	calr_itgav
3	Mac 2	L->R	Neu 2	CD99_CD81	cd99_cd81a
3	Mac 2	L->R	Neu 2	CXCL9_CXCR3	BX323596.2_cxcr3.3
3	Mac 2	L->R	Neu 2	F13A1_ITGA4	f13a1b_itga4
3	Mac 2	L->R	Neu 2	F13A1_ITGB1	f13a1b_itgb1b
3	Mac 2	L->R	Neu 2	FN1_C5AR1	fn1a_CABZ01041494.1
3	Mac 2	L->R	Neu 2	FN1_CD44	fn1a_cd44b
3	Mac 2	L->R	Neu 2	FN1_ITGA4	fn1a_itga4
3	Mac 2	L->R	Neu 2	FN1_ITGAV	fn1a_itgav
3	Mac 2	L->R	Neu 2	FN1_ITGB1	fn1a_itgb1b
3	Mac 2	L->R	Neu 2	GNAI2_ADCY7	gnai2b_adcy7
3	Mac 2	L->R	Neu 2	GNAI2_C5AR1	gnai2b_CABZ01041494.1
3	Mac 2	L->R	Neu 2	GNAI2_CXCR3	gnai2b_cxcr3.3
3	Mac 2	L->R	Neu 2	GNAI2_S1PR4	gnai2b_s1pr4
3	Mac 2	L->R	Neu 2	GNAI2_ADCY7	gnai2a_adcy7
3	Mac 2	L->R	Neu 2	GNAI2_C5AR1	gnai2a_CABZ01041494.1
3	Mac 2	L->R	Neu 2	GNAI2_CXCR3	gnai2a_cxcr3.3
3	Mac 2	L->R	Neu 2	GNAI2_S1PR4	gnai2a_s1pr4
3	Mac 2	L->R	Neu 2	GNAS_ADCY7	gnas_adcy7
3	Mac 2	L->R	Neu 2	GNAS_CRHR1	gnas_crhr1
3	Mac 2	L->R	Neu 2	GPI_AMFR	gpia_amfra
3	Mac 2	L->R	Neu 2	GRN_SORT1	grn1_sort1b
3	Mac 2	L->R	Neu 2	GRN_TNFRSF1A	grn1_fas
3	Mac 2	L->R	Neu 2	GRN_TNFRSF1B	grn1_tnfrsf1b
3	Mac 2	L->R	Neu 2	GRN_SORT1	grn2_sort1b
3	Mac 2	L->R	Neu 2	GRN_TNFRSF1A	grn2_fas
3	Mac 2	L->R	Neu 2	GRN_TNFRSF1B	grn2_tnfrsf1b
3	Mac 2	L->R	Neu 2	HBEGF_CD44	hbegfa_cd44b
3	Mac 2	L->R	Neu 2	HBEGF_CD82	hbegfa_cd82a
3	Mac 2	L->R	Neu 2	HBEGF_CD82	hbegfa_cd82b
3	Mac 2	L->R	Neu 2	HBEGF_CD44	hbegfb_cd44b
3	Mac 2	L->R	Neu 2	HBEGF_CD82	hbegfb_cd82a
3	Mac 2	L->R	Neu 2	HBEGF_CD82	hbegfb_cd82b
3	Mac 2	L->R	Neu 2	HMGB1_AGER	hmgb1a_si:ch211-79k12.1
3	Mac 2	L->R	Neu 2	HMGB1_CXCR4	hmgb1a_cxcr4b
3	Mac 2	L->R	Neu 2	HSPG2_ITGB1	hspg2_itgb1b
3	Mac 2	L->R	Neu 2	ICAM3_ITGB2	si:ch211-66e2.3_itgb2
3	Mac 2	L->R	Neu 2	ICAM3_ITGB2	si:ch73-208g10.1_itgb2
3	Mac 2	L->R	Neu 2	ICAM3_ITGB2	icam3_itgb2
3	Mac 2	L->R	Neu 2	IGF2_IGF2R	igf2b_igf2r
3	Mac 2	L->R	Neu 2	IGF2_INSR	igf2b_insra
3	Mac 2	L->R	Neu 2	IL16_CD4	il16_dicp1.3-4
3	Mac 2	L->R	Neu 2	IL16_CD4	il16_dicp3.3
3	Mac 2	L->R	Neu 2	IL16_CD4	il16_dicp3.1
3	Mac 2	L->R	Neu 2	IL1B_IL1R1	il1b_CABZ01054965.1
3	Mac 2	L->R	Neu 2	IL1B_IL1R1	il1b_zmp:0000000936
3	Mac 2	L->R	Neu 2	INHBA_ACVR2A	inhbaa_acvr2aa
3	Mac 2	L->R	Neu 2	INHBA_SMAD3	inhbaa_smad3a
3	Mac 2	L->R	Neu 2	LRPAP1_SORT1	lrpap1_sort1b
3	Mac 2	L->R	Neu 2	LTF_TFRC	tfa_tfr1b
3	Mac 2	L->R	Neu 2	MDK_ITGA4	mdka_itga4
3	Mac 2	L->R	Neu 2	MDK_ITGB1	mdka_itgb1b
3	Mac 2	L->R	Neu 2	MDK_SDC4	mdka_sdc4
3	Mac 2	L->R	Neu 2	MFNG_NOTCH2	mfng_notch2
3	Mac 2	L->R	Neu 2	MIF_CD44	mif_cd44b
3	Mac 2	L->R	Neu 2	MIF_CD74	mif_cd74a
3	Mac 2	L->R	Neu 2	MIF_CD74	mif_cd74b
3	Mac 2	L->R	Neu 2	MIF_CXCR4	mif_cxcr4b
3	Mac 2	L->R	Neu 2	MMP1_CD44	mmp13a_cd44b
3	Mac 2	L->R	Neu 2	MMP9_CD44	mmp9_cd44b
3	Mac 2	L->R	Neu 2	MMP9_ITGB2	mmp9_itgb2
3	Mac 2	L->R	Neu 2	NAMPT_INSR	nampta_insra
3	Mac 2	L->R	Neu 2	NUCB2_ERAP1	nucb2a_erap1b
3	Mac 2	L->R	Neu 2	PDGFB_ITGAV	pdgfba_itgav
3	Mac 2	L->R	Neu 2	PKM_CD44	pkma_cd44b
3	Mac 2	L->R	Neu 2	PSAP_SORT1	psap_sort1b
3	Mac 2	L->R	Neu 2	RPS19_C5AR1	rps19_CABZ01041494.1
3	Mac 2	L->R	Neu 2	SERPINE1_ITGAV	serpine1_itgav
3	Mac 2	L->R	Neu 2	TIMP2_CD44	timp2b_cd44b
3	Mac 2	L->R	Neu 2	TIMP2_ITGB1	timp2b_itgb1b
3	Mac 2	L->R	Neu 2	TNF_TNFRSF1A	tnfb_fas
3	Mac 2	L->R	Neu 2	TNF_TNFRSF1B	tnfb_tnfrsf1b
3	Mac 2	L->R	Neu 2	TNF_TRADD	tnfb_tradd
4	Mac 3	L->R	Neu 1	ADAM10_CD44	adam10a_cd44b
4	Mac 3	L->R	Neu 1	ADAM10_IL6R	adam10a_il6r
4	Mac 3	L->R	Neu 1	ADAM10_NOTCH2	adam10a_notch2
4	Mac 3	L->R	Neu 1	ADAM10_TSPAN14	adam10a_tspan14
4	Mac 3	L->R	Neu 1	ADAM17_IL6R	adam17a_il6r
4	Mac 3	L->R	Neu 1	ADAM17_ITGB1	adam17a_CABZ01058721.1
4	Mac 3	L->R	Neu 1	ADAM17_ITGB1	adam17a_itgb1b
4	Mac 3	L->R	Neu 1	ADAM28_ITGA4	adam28_itga4
4	Mac 3	L->R	Neu 1	ADAM9_ITGAV	adam9_itgav
4	Mac 3	L->R	Neu 1	ADAM9_ITGB1	adam9_CABZ01058721.1
4	Mac 3	L->R	Neu 1	ADAM9_ITGB1	adam9_itgb1b
4	Mac 3	L->R	Neu 1	AGTRAP_RACK1	agtrap_rack1
4	Mac 3	L->R	Neu 1	ALOX5AP_ALOX5	alox5ap_alox5a
4	Mac 3	L->R	Neu 1	APOE_ABCA1	apoeb_abca1a
4	Mac 3	L->R	Neu 1	APOE_ABCA1	apoeb_abca1b
4	Mac 3	L->R	Neu 1	APP_AGER	appa_si:ch211-79k12.1
4	Mac 3	L->R	Neu 1	APP_APLP2	appa_aplp2
4	Mac 3	L->R	Neu 1	APP_CD74	appa_cd74a
4	Mac 3	L->R	Neu 1	APP_CD74	appa_cd74b
4	Mac 3	L->R	Neu 1	APP_LRP10	appa_lrp10
4	Mac 3	L->R	Neu 1	APP_NOTCH2	appa_notch2
4	Mac 3	L->R	Neu 1	APP_RPSA	appa_rpsa
4	Mac 3	L->R	Neu 1	APP_AGER	appb_si:ch211-79k12.1
4	Mac 3	L->R	Neu 1	APP_APLP2	appb_aplp2
4	Mac 3	L->R	Neu 1	APP_CD74	appb_cd74a
4	Mac 3	L->R	Neu 1	APP_CD74	appb_cd74b
4	Mac 3	L->R	Neu 1	APP_LRP10	appb_lrp10
4	Mac 3	L->R	Neu 1	APP_NOTCH2	appb_notch2
4	Mac 3	L->R	Neu 1	APP_RPSA	appb_rpsa
4	Mac 3	L->R	Neu 1	ARF6_SMAP1	arf6a_smap1
4	Mac 3	L->R	Neu 1	ARF6_SMAP1	arf6b_smap1
4	Mac 3	L->R	Neu 1	BSG_SELE	bsg_selp
4	Mac 3	L->R	Neu 1	CALM2_ABCA1	calm3a_abca1a
4	Mac 3	L->R	Neu 1	CALM2_ABCA1	calm3a_abca1b
4	Mac 3	L->R	Neu 1	CALM2_INSR	calm3a_insra
4	Mac 3	L->R	Neu 1	CALM2_KCNQ5	calm3a_kcnq5b
4	Mac 3	L->R	Neu 1	CALM2_ABCA1	calm2a_abca1a
4	Mac 3	L->R	Neu 1	CALM2_ABCA1	calm2a_abca1b
4	Mac 3	L->R	Neu 1	CALM2_INSR	calm2a_insra
4	Mac 3	L->R	Neu 1	CALM2_KCNQ5	calm2a_kcnq5b
4	Mac 3	L->R	Neu 1	CALR_ITGAV	calr_itgav
4	Mac 3	L->R	Neu 1	CD99_CD81	cd99_cd81a
4	Mac 3	L->R	Neu 1	CSF3_CSF3R	csf3a_csf3r
4	Mac 3	L->R	Neu 1	CSF3_CSF3R	csf3b_csf3r
4	Mac 3	L->R	Neu 1	F13A1_ITGA4	f13a1b_itga4
4	Mac 3	L->R	Neu 1	F13A1_ITGB1	f13a1b_CABZ01058721.1
4	Mac 3	L->R	Neu 1	F13A1_ITGB1	f13a1b_itgb1b
4	Mac 3	L->R	Neu 1	FN1_C5AR1	fn1a_CABZ01041494.1
4	Mac 3	L->R	Neu 1	FN1_CD44	fn1a_cd44b
4	Mac 3	L->R	Neu 1	FN1_ITGA4	fn1a_itga4
4	Mac 3	L->R	Neu 1	FN1_ITGAV	fn1a_itgav
4	Mac 3	L->R	Neu 1	FN1_ITGB1	fn1a_CABZ01058721.1
4	Mac 3	L->R	Neu 1	FN1_ITGB1	fn1a_itgb1b
4	Mac 3	L->R	Neu 1	GNAI2_ADCY7	gnai2b_adcy7
4	Mac 3	L->R	Neu 1	GNAI2_C5AR1	gnai2b_CABZ01041494.1
4	Mac 3	L->R	Neu 1	GNAI2_S1PR4	gnai2b_s1pr4
4	Mac 3	L->R	Neu 1	GNAI2_ADCY7	gnai2a_adcy7
4	Mac 3	L->R	Neu 1	GNAI2_C5AR1	gnai2a_CABZ01041494.1
4	Mac 3	L->R	Neu 1	GNAI2_S1PR4	gnai2a_s1pr4
4	Mac 3	L->R	Neu 1	GNAS_ADCY7	gnas_adcy7
4	Mac 3	L->R	Neu 1	GNAS_CRHR1	gnas_crhr1
4	Mac 3	L->R	Neu 1	GPI_AMFR	gpia_amfra
4	Mac 3	L->R	Neu 1	GRN_SORT1	grn1_sort1b
4	Mac 3	L->R	Neu 1	GRN_TNFRSF1A	grn1_fas
4	Mac 3	L->R	Neu 1	GRN_TNFRSF1B	grn1_tnfrsf1b
4	Mac 3	L->R	Neu 1	GRN_SORT1	grn2_sort1b
4	Mac 3	L->R	Neu 1	GRN_TNFRSF1A	grn2_fas
4	Mac 3	L->R	Neu 1	GRN_TNFRSF1B	grn2_tnfrsf1b
4	Mac 3	L->R	Neu 1	HBEGF_CD44	hbegfa_cd44b
4	Mac 3	L->R	Neu 1	HBEGF_CD82	hbegfa_cd82b
4	Mac 3	L->R	Neu 1	HBEGF_CD44	hbegfb_cd44b
4	Mac 3	L->R	Neu 1	HBEGF_CD82	hbegfb_cd82b
4	Mac 3	L->R	Neu 1	HGF_CD44	hgfb_cd44b
4	Mac 3	L->R	Neu 1	HGF_ITGB1	hgfb_CABZ01058721.1
4	Mac 3	L->R	Neu 1	HGF_ITGB1	hgfb_itgb1b
4	Mac 3	L->R	Neu 1	HGF_ST14	hgfb_zmp:0000001114
4	Mac 3	L->R	Neu 1	HMGB1_AGER	hmgb1a_si:ch211-79k12.1
4	Mac 3	L->R	Neu 1	HMGB1_CXCR4	hmgb1a_cxcr4a
4	Mac 3	L->R	Neu 1	HMGB1_CXCR4	hmgb1a_cxcr4b
4	Mac 3	L->R	Neu 1	HSPG2_ITGB1	hspg2_CABZ01058721.1
4	Mac 3	L->R	Neu 1	HSPG2_ITGB1	hspg2_itgb1b
4	Mac 3	L->R	Neu 1	ICAM3_ITGB2	si:ch211-66e2.3_itgb2
4	Mac 3	L->R	Neu 1	ICAM3_ITGB2	icam3_itgb2
4	Mac 3	L->R	Neu 1	IGF2_IGF2R	igf2b_igf2r
4	Mac 3	L->R	Neu 1	IGF2_INSR	igf2b_insra
4	Mac 3	L->R	Neu 1	IL16_CD4	il16_dicp1.3-4
4	Mac 3	L->R	Neu 1	IL16_CD4	il16_dicp3.3
4	Mac 3	L->R	Neu 1	IL16_CD4	il16_dicp3.1
4	Mac 3	L->R	Neu 1	IL1B_IL1R1	il1b_zmp:0000000936
4	Mac 3	L->R	Neu 1	INHBA_ACVR2A	inhbaa_acvr2aa
4	Mac 3	L->R	Neu 1	INHBA_SMAD3	inhbaa_smad3a
4	Mac 3	L->R	Neu 1	LIN7C_ABCA1	lin7c_abca1a
4	Mac 3	L->R	Neu 1	LIN7C_ABCA1	lin7c_abca1b
4	Mac 3	L->R	Neu 1	LRPAP1_SORT1	lrpap1_sort1b
4	Mac 3	L->R	Neu 1	MFNG_NOTCH2	mfng_notch2
4	Mac 3	L->R	Neu 1	MIF_CD44	mif_cd44b
4	Mac 3	L->R	Neu 1	MIF_CD74	mif_cd74a
4	Mac 3	L->R	Neu 1	MIF_CD74	mif_cd74b
4	Mac 3	L->R	Neu 1	MIF_CXCR4	mif_cxcr4a
4	Mac 3	L->R	Neu 1	MIF_CXCR4	mif_cxcr4b
4	Mac 3	L->R	Neu 1	MMP9_CD44	mmp9_cd44b
4	Mac 3	L->R	Neu 1	MMP9_ITGB2	mmp9_itgb2
4	Mac 3	L->R	Neu 1	NUCB2_ERAP1	nucb2a_erap1b
4	Mac 3	L->R	Neu 1	NUCB2_ERAP1	nucb2b_erap1b
4	Mac 3	L->R	Neu 1	PDGFB_ITGAV	pdgfba_itgav
4	Mac 3	L->R	Neu 1	PKM_CD44	pkma_cd44b
4	Mac 3	L->R	Neu 1	PSAP_SORT1	psap_sort1b
4	Mac 3	L->R	Neu 1	RPS19_C5AR1	rps19_CABZ01041494.1
4	Mac 3	L->R	Neu 1	SERPINE1_ITGAV	serpine1_itgav
4	Mac 3	L->R	Neu 1	TIMP2_CD44	timp2b_cd44b
4	Mac 3	L->R	Neu 1	TIMP2_ITGB1	timp2b_CABZ01058721.1
4	Mac 3	L->R	Neu 1	TIMP2_ITGB1	timp2b_itgb1b
4	Mac 3	L->R	Neu 1	TNF_TNFRSF1A	tnfb_fas
4	Mac 3	L->R	Neu 1	TNF_TNFRSF1B	tnfb_tnfrsf1b
4	Mac 3	L->R	Neu 1	TNF_TRADD	tnfb_tradd
4	Mac 3	L->R	Neu 1	UBA52_TGFBR1	uba52_tgfbr1b
5	Mac 3	L->R	Neu 2	ADAM10_CD44	adam10a_cd44b
5	Mac 3	L->R	Neu 2	ADAM10_IL6R	adam10a_il6r
5	Mac 3	L->R	Neu 2	ADAM10_NOTCH2	adam10a_notch2
5	Mac 3	L->R	Neu 2	ADAM10_TSPAN14	adam10a_tspan14
5	Mac 3	L->R	Neu 2	ADAM17_IL6R	adam17a_il6r
5	Mac 3	L->R	Neu 2	ADAM17_ITGB1	adam17a_itgb1b
5	Mac 3	L->R	Neu 2	ADAM28_ITGA4	adam28_itga4
5	Mac 3	L->R	Neu 2	ADAM9_ITGAV	adam9_itgav
5	Mac 3	L->R	Neu 2	ADAM9_ITGB1	adam9_itgb1b
5	Mac 3	L->R	Neu 2	AGTRAP_RACK1	agtrap_rack1
5	Mac 3	L->R	Neu 2	ALOX5AP_ALOX5	alox5ap_alox5a
5	Mac 3	L->R	Neu 2	APOE_ABCA1	apoeb_abca1a
5	Mac 3	L->R	Neu 2	APOE_ABCA1	apoeb_abca1b
5	Mac 3	L->R	Neu 2	APP_AGER	appa_si:ch211-79k12.1
5	Mac 3	L->R	Neu 2	APP_APLP2	appa_aplp2
5	Mac 3	L->R	Neu 2	APP_CD74	appa_cd74a
5	Mac 3	L->R	Neu 2	APP_CD74	appa_cd74b
5	Mac 3	L->R	Neu 2	APP_LRP10	appa_lrp10
5	Mac 3	L->R	Neu 2	APP_NOTCH2	appa_notch2
5	Mac 3	L->R	Neu 2	APP_RPSA	appa_rpsa
5	Mac 3	L->R	Neu 2	APP_AGER	appb_si:ch211-79k12.1
5	Mac 3	L->R	Neu 2	APP_APLP2	appb_aplp2
5	Mac 3	L->R	Neu 2	APP_CD74	appb_cd74a
5	Mac 3	L->R	Neu 2	APP_CD74	appb_cd74b
5	Mac 3	L->R	Neu 2	APP_LRP10	appb_lrp10
5	Mac 3	L->R	Neu 2	APP_NOTCH2	appb_notch2
5	Mac 3	L->R	Neu 2	APP_RPSA	appb_rpsa
5	Mac 3	L->R	Neu 2	ARF6_SMAP1	arf6a_smap1
5	Mac 3	L->R	Neu 2	ARF6_SMAP1	arf6b_smap1
5	Mac 3	L->R	Neu 2	BSG_SELE	bsg_selp
5	Mac 3	L->R	Neu 2	CALM2_ABCA1	calm3a_abca1a
5	Mac 3	L->R	Neu 2	CALM2_ABCA1	calm3a_abca1b
5	Mac 3	L->R	Neu 2	CALM2_INSR	calm3a_insra
5	Mac 3	L->R	Neu 2	CALM2_KCNQ5	calm3a_kcnq5b
5	Mac 3	L->R	Neu 2	CALM2_ABCA1	calm2a_abca1a
5	Mac 3	L->R	Neu 2	CALM2_ABCA1	calm2a_abca1b
5	Mac 3	L->R	Neu 2	CALM2_INSR	calm2a_insra
5	Mac 3	L->R	Neu 2	CALM2_KCNQ5	calm2a_kcnq5b
5	Mac 3	L->R	Neu 2	CALR_ITGAV	calr_itgav
5	Mac 3	L->R	Neu 2	CD99_CD81	cd99_cd81a
5	Mac 3	L->R	Neu 2	CSF3_CSF3R	csf3a_csf3r
5	Mac 3	L->R	Neu 2	CSF3_CSF3R	csf3b_csf3r
5	Mac 3	L->R	Neu 2	CXCL9_CXCR3	BX323596.2_cxcr3.3
5	Mac 3	L->R	Neu 2	F13A1_ITGA4	f13a1b_itga4
5	Mac 3	L->R	Neu 2	F13A1_ITGB1	f13a1b_itgb1b
5	Mac 3	L->R	Neu 2	FN1_C5AR1	fn1a_CABZ01041494.1
5	Mac 3	L->R	Neu 2	FN1_CD44	fn1a_cd44b
5	Mac 3	L->R	Neu 2	FN1_ITGA4	fn1a_itga4
5	Mac 3	L->R	Neu 2	FN1_ITGAV	fn1a_itgav
5	Mac 3	L->R	Neu 2	FN1_ITGB1	fn1a_itgb1b
5	Mac 3	L->R	Neu 2	GNAI2_ADCY7	gnai2b_adcy7
5	Mac 3	L->R	Neu 2	GNAI2_C5AR1	gnai2b_CABZ01041494.1
5	Mac 3	L->R	Neu 2	GNAI2_CXCR3	gnai2b_cxcr3.3
5	Mac 3	L->R	Neu 2	GNAI2_S1PR4	gnai2b_s1pr4
5	Mac 3	L->R	Neu 2	GNAI2_ADCY7	gnai2a_adcy7
5	Mac 3	L->R	Neu 2	GNAI2_C5AR1	gnai2a_CABZ01041494.1
5	Mac 3	L->R	Neu 2	GNAI2_CXCR3	gnai2a_cxcr3.3
5	Mac 3	L->R	Neu 2	GNAI2_S1PR4	gnai2a_s1pr4
5	Mac 3	L->R	Neu 2	GNAS_ADCY7	gnas_adcy7
5	Mac 3	L->R	Neu 2	GNAS_CRHR1	gnas_crhr1
5	Mac 3	L->R	Neu 2	GPI_AMFR	gpia_amfra
5	Mac 3	L->R	Neu 2	GRN_SORT1	grn1_sort1b
5	Mac 3	L->R	Neu 2	GRN_TNFRSF1A	grn1_fas
5	Mac 3	L->R	Neu 2	GRN_TNFRSF1B	grn1_tnfrsf1b
5	Mac 3	L->R	Neu 2	GRN_SORT1	grn2_sort1b
5	Mac 3	L->R	Neu 2	GRN_TNFRSF1A	grn2_fas
5	Mac 3	L->R	Neu 2	GRN_TNFRSF1B	grn2_tnfrsf1b
5	Mac 3	L->R	Neu 2	HBEGF_CD44	hbegfa_cd44b
5	Mac 3	L->R	Neu 2	HBEGF_CD82	hbegfa_cd82a
5	Mac 3	L->R	Neu 2	HBEGF_CD82	hbegfa_cd82b
5	Mac 3	L->R	Neu 2	HBEGF_CD44	hbegfb_cd44b
5	Mac 3	L->R	Neu 2	HBEGF_CD82	hbegfb_cd82a
5	Mac 3	L->R	Neu 2	HBEGF_CD82	hbegfb_cd82b
5	Mac 3	L->R	Neu 2	HGF_CD44	hgfb_cd44b
5	Mac 3	L->R	Neu 2	HGF_ITGB1	hgfb_itgb1b
5	Mac 3	L->R	Neu 2	HMGB1_AGER	hmgb1a_si:ch211-79k12.1
5	Mac 3	L->R	Neu 2	HMGB1_CXCR4	hmgb1a_cxcr4b
5	Mac 3	L->R	Neu 2	HSPG2_ITGB1	hspg2_itgb1b
5	Mac 3	L->R	Neu 2	ICAM3_ITGB2	si:ch211-66e2.3_itgb2
5	Mac 3	L->R	Neu 2	ICAM3_ITGB2	icam3_itgb2
5	Mac 3	L->R	Neu 2	IGF2_IGF2R	igf2b_igf2r
5	Mac 3	L->R	Neu 2	IGF2_INSR	igf2b_insra
5	Mac 3	L->R	Neu 2	IL16_CD4	il16_dicp1.3-4
5	Mac 3	L->R	Neu 2	IL16_CD4	il16_dicp3.3
5	Mac 3	L->R	Neu 2	IL16_CD4	il16_dicp3.1
5	Mac 3	L->R	Neu 2	IL1B_IL1R1	il1b_CABZ01054965.1
5	Mac 3	L->R	Neu 2	IL1B_IL1R1	il1b_zmp:0000000936
5	Mac 3	L->R	Neu 2	INHBA_ACVR2A	inhbaa_acvr2aa
5	Mac 3	L->R	Neu 2	INHBA_SMAD3	inhbaa_smad3a
5	Mac 3	L->R	Neu 2	LIN7C_ABCA1	lin7c_abca1a
5	Mac 3	L->R	Neu 2	LIN7C_ABCA1	lin7c_abca1b
5	Mac 3	L->R	Neu 2	LRPAP1_SORT1	lrpap1_sort1b
5	Mac 3	L->R	Neu 2	MFNG_NOTCH2	mfng_notch2
5	Mac 3	L->R	Neu 2	MIF_CD44	mif_cd44b
5	Mac 3	L->R	Neu 2	MIF_CD74	mif_cd74a
5	Mac 3	L->R	Neu 2	MIF_CD74	mif_cd74b
5	Mac 3	L->R	Neu 2	MIF_CXCR4	mif_cxcr4b
5	Mac 3	L->R	Neu 2	MMP9_CD44	mmp9_cd44b
5	Mac 3	L->R	Neu 2	MMP9_ITGB2	mmp9_itgb2
5	Mac 3	L->R	Neu 2	NUCB2_ERAP1	nucb2a_erap1b
5	Mac 3	L->R	Neu 2	NUCB2_ERAP1	nucb2b_erap1b
5	Mac 3	L->R	Neu 2	PDGFB_ITGAV	pdgfba_itgav
5	Mac 3	L->R	Neu 2	PKM_CD44	pkma_cd44b
5	Mac 3	L->R	Neu 2	PSAP_SORT1	psap_sort1b
5	Mac 3	L->R	Neu 2	RPS19_C5AR1	rps19_CABZ01041494.1
5	Mac 3	L->R	Neu 2	SERPINE1_ITGAV	serpine1_itgav
5	Mac 3	L->R	Neu 2	TIMP2_CD44	timp2b_cd44b
5	Mac 3	L->R	Neu 2	TIMP2_ITGB1	timp2b_itgb1b
5	Mac 3	L->R	Neu 2	TNF_TNFRSF1A	tnfb_fas
5	Mac 3	L->R	Neu 2	TNF_TNFRSF1B	tnfb_tnfrsf1b
5	Mac 3	L->R	Neu 2	TNF_TRADD	tnfb_tradd
6	Mac 4	L->R	Neu 1	ADAM10_CD44	adam10a_cd44b
6	Mac 4	L->R	Neu 1	ADAM10_IL6R	adam10a_il6r
6	Mac 4	L->R	Neu 1	ADAM10_NOTCH2	adam10a_notch2
6	Mac 4	L->R	Neu 1	ADAM10_TSPAN14	adam10a_tspan14
6	Mac 4	L->R	Neu 1	ADAM17_IL6R	adam17a_il6r
6	Mac 4	L->R	Neu 1	ADAM17_ITGB1	adam17a_CABZ01058721.1
6	Mac 4	L->R	Neu 1	ADAM17_ITGB1	adam17a_itgb1b
6	Mac 4	L->R	Neu 1	ADAM28_ITGA4	adam28_itga4
6	Mac 4	L->R	Neu 1	ADAM9_ITGAV	adam9_itgav
6	Mac 4	L->R	Neu 1	ADAM9_ITGB1	adam9_CABZ01058721.1
6	Mac 4	L->R	Neu 1	ADAM9_ITGB1	adam9_itgb1b
6	Mac 4	L->R	Neu 1	AGTRAP_RACK1	agtrap_rack1
6	Mac 4	L->R	Neu 1	ALOX5AP_ALOX5	alox5ap_alox5a
6	Mac 4	L->R	Neu 1	APOE_ABCA1	apoeb_abca1a
6	Mac 4	L->R	Neu 1	APOE_ABCA1	apoeb_abca1b
6	Mac 4	L->R	Neu 1	APP_AGER	appa_si:ch211-79k12.1
6	Mac 4	L->R	Neu 1	APP_APLP2	appa_aplp2
6	Mac 4	L->R	Neu 1	APP_CD74	appa_cd74a
6	Mac 4	L->R	Neu 1	APP_CD74	appa_cd74b
6	Mac 4	L->R	Neu 1	APP_LRP10	appa_lrp10
6	Mac 4	L->R	Neu 1	APP_NOTCH2	appa_notch2
6	Mac 4	L->R	Neu 1	APP_RPSA	appa_rpsa
6	Mac 4	L->R	Neu 1	ARF6_SMAP1	arf6a_smap1
6	Mac 4	L->R	Neu 1	ARF6_SMAP1	arf6b_smap1
6	Mac 4	L->R	Neu 1	BSG_SELE	bsg_selp
6	Mac 4	L->R	Neu 1	CALM2_ABCA1	calm3a_abca1a
6	Mac 4	L->R	Neu 1	CALM2_ABCA1	calm3a_abca1b
6	Mac 4	L->R	Neu 1	CALM2_INSR	calm3a_insra
6	Mac 4	L->R	Neu 1	CALM2_KCNQ5	calm3a_kcnq5b
6	Mac 4	L->R	Neu 1	CALM2_ABCA1	calm2a_abca1a
6	Mac 4	L->R	Neu 1	CALM2_ABCA1	calm2a_abca1b
6	Mac 4	L->R	Neu 1	CALM2_INSR	calm2a_insra
6	Mac 4	L->R	Neu 1	CALM2_KCNQ5	calm2a_kcnq5b
6	Mac 4	L->R	Neu 1	CALR_ITGAV	calr_itgav
6	Mac 4	L->R	Neu 1	CD99_CD81	cd99_cd81a
6	Mac 4	L->R	Neu 1	CNTF_IL6R	m17_il6r
6	Mac 4	L->R	Neu 1	CSF3_CSF3R	csf3a_csf3r
6	Mac 4	L->R	Neu 1	CSF3_CSF3R	csf3b_csf3r
6	Mac 4	L->R	Neu 1	F13A1_ITGA4	f13a1b_itga4
6	Mac 4	L->R	Neu 1	F13A1_ITGB1	f13a1b_CABZ01058721.1
6	Mac 4	L->R	Neu 1	F13A1_ITGB1	f13a1b_itgb1b
6	Mac 4	L->R	Neu 1	FN1_C5AR1	fn1a_CABZ01041494.1
6	Mac 4	L->R	Neu 1	FN1_CD44	fn1a_cd44b
6	Mac 4	L->R	Neu 1	FN1_ITGA4	fn1a_itga4
6	Mac 4	L->R	Neu 1	FN1_ITGAV	fn1a_itgav
6	Mac 4	L->R	Neu 1	FN1_ITGB1	fn1a_CABZ01058721.1
6	Mac 4	L->R	Neu 1	FN1_ITGB1	fn1a_itgb1b
6	Mac 4	L->R	Neu 1	GNAI2_ADCY7	gnai2b_adcy7
6	Mac 4	L->R	Neu 1	GNAI2_C5AR1	gnai2b_CABZ01041494.1
6	Mac 4	L->R	Neu 1	GNAI2_S1PR4	gnai2b_s1pr4
6	Mac 4	L->R	Neu 1	GNAI2_ADCY7	gnai2a_adcy7
6	Mac 4	L->R	Neu 1	GNAI2_C5AR1	gnai2a_CABZ01041494.1
6	Mac 4	L->R	Neu 1	GNAI2_S1PR4	gnai2a_s1pr4
6	Mac 4	L->R	Neu 1	GNAS_ADCY7	gnas_adcy7
6	Mac 4	L->R	Neu 1	GNAS_CRHR1	gnas_crhr1
6	Mac 4	L->R	Neu 1	GPI_AMFR	gpia_amfra
6	Mac 4	L->R	Neu 1	GRN_SORT1	grn1_sort1b
6	Mac 4	L->R	Neu 1	GRN_TNFRSF1A	grn1_fas
6	Mac 4	L->R	Neu 1	GRN_TNFRSF1B	grn1_tnfrsf1b
6	Mac 4	L->R	Neu 1	GRN_SORT1	grn2_sort1b
6	Mac 4	L->R	Neu 1	GRN_TNFRSF1A	grn2_fas
6	Mac 4	L->R	Neu 1	GRN_TNFRSF1B	grn2_tnfrsf1b
6	Mac 4	L->R	Neu 1	HBEGF_CD44	hbegfa_cd44b
6	Mac 4	L->R	Neu 1	HBEGF_CD82	hbegfa_cd82b
6	Mac 4	L->R	Neu 1	HBEGF_CD44	hbegfb_cd44b
6	Mac 4	L->R	Neu 1	HBEGF_CD82	hbegfb_cd82b
6	Mac 4	L->R	Neu 1	HMGB1_AGER	hmgb1a_si:ch211-79k12.1
6	Mac 4	L->R	Neu 1	HMGB1_CXCR4	hmgb1a_cxcr4a
6	Mac 4	L->R	Neu 1	HMGB1_CXCR4	hmgb1a_cxcr4b
6	Mac 4	L->R	Neu 1	HSPG2_ITGB1	hspg2_CABZ01058721.1
6	Mac 4	L->R	Neu 1	HSPG2_ITGB1	hspg2_itgb1b
6	Mac 4	L->R	Neu 1	ICAM3_ITGB2	si:ch211-66e2.3_itgb2
6	Mac 4	L->R	Neu 1	ICAM3_ITGB2	si:ch73-208g10.1_itgb2
6	Mac 4	L->R	Neu 1	ICAM3_ITGB2	icam3_itgb2
6	Mac 4	L->R	Neu 1	IGF2_IGF2R	igf2b_igf2r
6	Mac 4	L->R	Neu 1	IGF2_INSR	igf2b_insra
6	Mac 4	L->R	Neu 1	IL16_CD4	il16_dicp1.3-4
6	Mac 4	L->R	Neu 1	IL16_CD4	il16_dicp3.3
6	Mac 4	L->R	Neu 1	IL16_CD4	il16_dicp3.1
6	Mac 4	L->R	Neu 1	IL1B_IL1R1	il1b_zmp:0000000936
6	Mac 4	L->R	Neu 1	INHBA_ACVR2A	inhbaa_acvr2aa
6	Mac 4	L->R	Neu 1	INHBA_SMAD3	inhbaa_smad3a
6	Mac 4	L->R	Neu 1	LAMB1_ITGAV	lamb1b_itgav
6	Mac 4	L->R	Neu 1	LAMB1_ITGB1	lamb1b_CABZ01058721.1
6	Mac 4	L->R	Neu 1	LAMB1_ITGB1	lamb1b_itgb1b
6	Mac 4	L->R	Neu 1	LIN7C_ABCA1	lin7c_abca1a
6	Mac 4	L->R	Neu 1	LIN7C_ABCA1	lin7c_abca1b
6	Mac 4	L->R	Neu 1	LRPAP1_SORT1	lrpap1_sort1b
6	Mac 4	L->R	Neu 1	LTF_TFRC	tfa_tfr1b
6	Mac 4	L->R	Neu 1	MFNG_NOTCH2	mfng_notch2
6	Mac 4	L->R	Neu 1	MIF_CD44	mif_cd44b
6	Mac 4	L->R	Neu 1	MIF_CD74	mif_cd74a
6	Mac 4	L->R	Neu 1	MIF_CD74	mif_cd74b
6	Mac 4	L->R	Neu 1	MIF_CXCR4	mif_cxcr4a
6	Mac 4	L->R	Neu 1	MIF_CXCR4	mif_cxcr4b
6	Mac 4	L->R	Neu 1	MMP9_CD44	mmp9_cd44b
6	Mac 4	L->R	Neu 1	MMP9_ITGB2	mmp9_itgb2
6	Mac 4	L->R	Neu 1	NAMPT_INSR	nampta_insra
6	Mac 4	L->R	Neu 1	NUCB2_ERAP1	nucb2a_erap1b
6	Mac 4	L->R	Neu 1	NUCB2_ERAP1	nucb2b_erap1b
6	Mac 4	L->R	Neu 1	PDGFB_ITGAV	pdgfba_itgav
6	Mac 4	L->R	Neu 1	PKM_CD44	pkma_cd44b
6	Mac 4	L->R	Neu 1	PSAP_SORT1	psap_sort1b
6	Mac 4	L->R	Neu 1	PSEN1_CD44	psen1_cd44b
6	Mac 4	L->R	Neu 1	PSEN1_NOTCH2	psen1_notch2
6	Mac 4	L->R	Neu 1	RPS19_C5AR1	rps19_CABZ01041494.1
6	Mac 4	L->R	Neu 1	SERPINE1_ITGAV	serpine1_itgav
6	Mac 4	L->R	Neu 1	TIMP2_CD44	timp2b_cd44b
6	Mac 4	L->R	Neu 1	TIMP2_ITGB1	timp2b_CABZ01058721.1
6	Mac 4	L->R	Neu 1	TIMP2_ITGB1	timp2b_itgb1b
6	Mac 4	L->R	Neu 1	TNF_TNFRSF1A	tnfa_fas
6	Mac 4	L->R	Neu 1	TNF_TNFRSF1B	tnfa_tnfrsf1b
6	Mac 4	L->R	Neu 1	TNF_TRADD	tnfa_tradd
6	Mac 4	L->R	Neu 1	TNF_TNFRSF1A	tnfb_fas
6	Mac 4	L->R	Neu 1	TNF_TNFRSF1B	tnfb_tnfrsf1b
6	Mac 4	L->R	Neu 1	TNF_TRADD	tnfb_tradd
6	Mac 4	L->R	Neu 1	UBA52_TGFBR1	uba52_tgfbr1b
7	Mac 4	L->R	Neu 2	ADAM10_CD44	adam10a_cd44b
7	Mac 4	L->R	Neu 2	ADAM10_IL6R	adam10a_il6r
7	Mac 4	L->R	Neu 2	ADAM10_NOTCH2	adam10a_notch2
7	Mac 4	L->R	Neu 2	ADAM10_TSPAN14	adam10a_tspan14
7	Mac 4	L->R	Neu 2	ADAM17_IL6R	adam17a_il6r
7	Mac 4	L->R	Neu 2	ADAM17_ITGB1	adam17a_itgb1b
7	Mac 4	L->R	Neu 2	ADAM28_ITGA4	adam28_itga4
7	Mac 4	L->R	Neu 2	ADAM9_ITGAV	adam9_itgav
7	Mac 4	L->R	Neu 2	ADAM9_ITGB1	adam9_itgb1b
7	Mac 4	L->R	Neu 2	AGTRAP_RACK1	agtrap_rack1
7	Mac 4	L->R	Neu 2	ALOX5AP_ALOX5	alox5ap_alox5a
7	Mac 4	L->R	Neu 2	APOE_ABCA1	apoeb_abca1a
7	Mac 4	L->R	Neu 2	APOE_ABCA1	apoeb_abca1b
7	Mac 4	L->R	Neu 2	APP_AGER	appa_si:ch211-79k12.1
7	Mac 4	L->R	Neu 2	APP_APLP2	appa_aplp2
7	Mac 4	L->R	Neu 2	APP_CD74	appa_cd74a
7	Mac 4	L->R	Neu 2	APP_CD74	appa_cd74b
7	Mac 4	L->R	Neu 2	APP_LRP10	appa_lrp10
7	Mac 4	L->R	Neu 2	APP_NOTCH2	appa_notch2
7	Mac 4	L->R	Neu 2	APP_RPSA	appa_rpsa
7	Mac 4	L->R	Neu 2	ARF6_SMAP1	arf6a_smap1
7	Mac 4	L->R	Neu 2	ARF6_SMAP1	arf6b_smap1
7	Mac 4	L->R	Neu 2	BSG_SELE	bsg_selp
7	Mac 4	L->R	Neu 2	CALM2_ABCA1	calm3a_abca1a
7	Mac 4	L->R	Neu 2	CALM2_ABCA1	calm3a_abca1b
7	Mac 4	L->R	Neu 2	CALM2_INSR	calm3a_insra
7	Mac 4	L->R	Neu 2	CALM2_KCNQ5	calm3a_kcnq5b
7	Mac 4	L->R	Neu 2	CALM2_ABCA1	calm2a_abca1a
7	Mac 4	L->R	Neu 2	CALM2_ABCA1	calm2a_abca1b
7	Mac 4	L->R	Neu 2	CALM2_INSR	calm2a_insra
7	Mac 4	L->R	Neu 2	CALM2_KCNQ5	calm2a_kcnq5b
7	Mac 4	L->R	Neu 2	CALR_ITGAV	calr_itgav
7	Mac 4	L->R	Neu 2	CD99_CD81	cd99_cd81a
7	Mac 4	L->R	Neu 2	CNTF_IL6R	m17_il6r
7	Mac 4	L->R	Neu 2	CSF3_CSF3R	csf3a_csf3r
7	Mac 4	L->R	Neu 2	CSF3_CSF3R	csf3b_csf3r
7	Mac 4	L->R	Neu 2	CXCL9_CXCR3	BX323596.1_cxcr3.3
7	Mac 4	L->R	Neu 2	CXCL9_CXCR3	BX323596.2_cxcr3.3
7	Mac 4	L->R	Neu 2	F13A1_ITGA4	f13a1b_itga4
7	Mac 4	L->R	Neu 2	F13A1_ITGB1	f13a1b_itgb1b
7	Mac 4	L->R	Neu 2	FN1_C5AR1	fn1a_CABZ01041494.1
7	Mac 4	L->R	Neu 2	FN1_CD44	fn1a_cd44b
7	Mac 4	L->R	Neu 2	FN1_ITGA4	fn1a_itga4
7	Mac 4	L->R	Neu 2	FN1_ITGAV	fn1a_itgav
7	Mac 4	L->R	Neu 2	FN1_ITGB1	fn1a_itgb1b
7	Mac 4	L->R	Neu 2	GNAI2_ADCY7	gnai2b_adcy7
7	Mac 4	L->R	Neu 2	GNAI2_C5AR1	gnai2b_CABZ01041494.1
7	Mac 4	L->R	Neu 2	GNAI2_CXCR3	gnai2b_cxcr3.3
7	Mac 4	L->R	Neu 2	GNAI2_S1PR4	gnai2b_s1pr4
7	Mac 4	L->R	Neu 2	GNAI2_ADCY7	gnai2a_adcy7
7	Mac 4	L->R	Neu 2	GNAI2_C5AR1	gnai2a_CABZ01041494.1
7	Mac 4	L->R	Neu 2	GNAI2_CXCR3	gnai2a_cxcr3.3
7	Mac 4	L->R	Neu 2	GNAI2_S1PR4	gnai2a_s1pr4
7	Mac 4	L->R	Neu 2	GNAS_ADCY7	gnas_adcy7
7	Mac 4	L->R	Neu 2	GNAS_CRHR1	gnas_crhr1
7	Mac 4	L->R	Neu 2	GPI_AMFR	gpia_amfra
7	Mac 4	L->R	Neu 2	GRN_SORT1	grn1_sort1b
7	Mac 4	L->R	Neu 2	GRN_TNFRSF1A	grn1_fas
7	Mac 4	L->R	Neu 2	GRN_TNFRSF1B	grn1_tnfrsf1b
7	Mac 4	L->R	Neu 2	GRN_SORT1	grn2_sort1b
7	Mac 4	L->R	Neu 2	GRN_TNFRSF1A	grn2_fas
7	Mac 4	L->R	Neu 2	GRN_TNFRSF1B	grn2_tnfrsf1b
7	Mac 4	L->R	Neu 2	HBEGF_CD44	hbegfa_cd44b
7	Mac 4	L->R	Neu 2	HBEGF_CD82	hbegfa_cd82a
7	Mac 4	L->R	Neu 2	HBEGF_CD82	hbegfa_cd82b
7	Mac 4	L->R	Neu 2	HBEGF_CD44	hbegfb_cd44b
7	Mac 4	L->R	Neu 2	HBEGF_CD82	hbegfb_cd82a
7	Mac 4	L->R	Neu 2	HBEGF_CD82	hbegfb_cd82b
7	Mac 4	L->R	Neu 2	HMGB1_AGER	hmgb1a_si:ch211-79k12.1
7	Mac 4	L->R	Neu 2	HMGB1_CXCR4	hmgb1a_cxcr4b
7	Mac 4	L->R	Neu 2	HSPG2_ITGB1	hspg2_itgb1b
7	Mac 4	L->R	Neu 2	ICAM3_ITGB2	si:ch211-66e2.3_itgb2
7	Mac 4	L->R	Neu 2	ICAM3_ITGB2	si:ch73-208g10.1_itgb2
7	Mac 4	L->R	Neu 2	ICAM3_ITGB2	icam3_itgb2
7	Mac 4	L->R	Neu 2	IGF2_IGF2R	igf2b_igf2r
7	Mac 4	L->R	Neu 2	IGF2_INSR	igf2b_insra
7	Mac 4	L->R	Neu 2	IL16_CD4	il16_dicp1.3-4
7	Mac 4	L->R	Neu 2	IL16_CD4	il16_dicp3.3
7	Mac 4	L->R	Neu 2	IL16_CD4	il16_dicp3.1
7	Mac 4	L->R	Neu 2	IL1B_IL1R1	il1b_CABZ01054965.1
7	Mac 4	L->R	Neu 2	IL1B_IL1R1	il1b_zmp:0000000936
7	Mac 4	L->R	Neu 2	INHBA_ACVR2A	inhbaa_acvr2aa
7	Mac 4	L->R	Neu 2	INHBA_SMAD3	inhbaa_smad3a
7	Mac 4	L->R	Neu 2	LAMB1_ITGAV	lamb1b_itgav
7	Mac 4	L->R	Neu 2	LAMB1_ITGB1	lamb1b_itgb1b
7	Mac 4	L->R	Neu 2	LIN7C_ABCA1	lin7c_abca1a
7	Mac 4	L->R	Neu 2	LIN7C_ABCA1	lin7c_abca1b
7	Mac 4	L->R	Neu 2	LRPAP1_SORT1	lrpap1_sort1b
7	Mac 4	L->R	Neu 2	LTF_TFRC	tfa_tfr1b
7	Mac 4	L->R	Neu 2	MFNG_NOTCH2	mfng_notch2
7	Mac 4	L->R	Neu 2	MIF_CD44	mif_cd44b
7	Mac 4	L->R	Neu 2	MIF_CD74	mif_cd74a
7	Mac 4	L->R	Neu 2	MIF_CD74	mif_cd74b
7	Mac 4	L->R	Neu 2	MIF_CXCR4	mif_cxcr4b
7	Mac 4	L->R	Neu 2	MMP9_CD44	mmp9_cd44b
7	Mac 4	L->R	Neu 2	MMP9_ITGB2	mmp9_itgb2
7	Mac 4	L->R	Neu 2	NAMPT_INSR	nampta_insra
7	Mac 4	L->R	Neu 2	NUCB2_ERAP1	nucb2a_erap1b
7	Mac 4	L->R	Neu 2	NUCB2_ERAP1	nucb2b_erap1b
7	Mac 4	L->R	Neu 2	PDGFB_ITGAV	pdgfba_itgav
7	Mac 4	L->R	Neu 2	PKM_CD44	pkma_cd44b
7	Mac 4	L->R	Neu 2	PSAP_SORT1	psap_sort1b
7	Mac 4	L->R	Neu 2	PSEN1_CD44	psen1_cd44b
7	Mac 4	L->R	Neu 2	PSEN1_NOTCH2	psen1_notch2
7	Mac 4	L->R	Neu 2	RPS19_C5AR1	rps19_CABZ01041494.1
7	Mac 4	L->R	Neu 2	SERPINE1_ITGAV	serpine1_itgav
7	Mac 4	L->R	Neu 2	TIMP2_CD44	timp2b_cd44b
7	Mac 4	L->R	Neu 2	TIMP2_ITGB1	timp2b_itgb1b
7	Mac 4	L->R	Neu 2	TNF_TNFRSF1A	tnfa_fas
7	Mac 4	L->R	Neu 2	TNF_TNFRSF1B	tnfa_tnfrsf1b
7	Mac 4	L->R	Neu 2	TNF_TRADD	tnfa_tradd
7	Mac 4	L->R	Neu 2	TNF_TNFRSF1A	tnfb_fas
7	Mac 4	L->R	Neu 2	TNF_TNFRSF1B	tnfb_tnfrsf1b
7	Mac 4	L->R	Neu 2	TNF_TRADD	tnfb_tradd
8	Mac 5	L->R	Neu 1	ADAM10_CD44	adam10a_cd44b
8	Mac 5	L->R	Neu 1	ADAM10_IL6R	adam10a_il6r
8	Mac 5	L->R	Neu 1	ADAM10_NOTCH2	adam10a_notch2
8	Mac 5	L->R	Neu 1	ADAM10_TSPAN14	adam10a_tspan14
8	Mac 5	L->R	Neu 1	ADAM17_IL6R	adam17a_il6r
8	Mac 5	L->R	Neu 1	ADAM17_ITGB1	adam17a_CABZ01058721.1
8	Mac 5	L->R	Neu 1	ADAM17_ITGB1	adam17a_itgb1b
8	Mac 5	L->R	Neu 1	ADAM9_ITGAV	adam9_itgav
8	Mac 5	L->R	Neu 1	ADAM9_ITGB1	adam9_CABZ01058721.1
8	Mac 5	L->R	Neu 1	ADAM9_ITGB1	adam9_itgb1b
8	Mac 5	L->R	Neu 1	AGTRAP_RACK1	agtrap_rack1
8	Mac 5	L->R	Neu 1	ALOX5AP_ALOX5	alox5ap_alox5a
8	Mac 5	L->R	Neu 1	APOE_ABCA1	apoeb_abca1a
8	Mac 5	L->R	Neu 1	APOE_ABCA1	apoeb_abca1b
8	Mac 5	L->R	Neu 1	APP_AGER	appa_si:ch211-79k12.1
8	Mac 5	L->R	Neu 1	APP_APLP2	appa_aplp2
8	Mac 5	L->R	Neu 1	APP_CD74	appa_cd74a
8	Mac 5	L->R	Neu 1	APP_CD74	appa_cd74b
8	Mac 5	L->R	Neu 1	APP_LRP10	appa_lrp10
8	Mac 5	L->R	Neu 1	APP_NOTCH2	appa_notch2
8	Mac 5	L->R	Neu 1	APP_RPSA	appa_rpsa
8	Mac 5	L->R	Neu 1	ARF6_SMAP1	arf6a_smap1
8	Mac 5	L->R	Neu 1	ARF6_SMAP1	arf6b_smap1
8	Mac 5	L->R	Neu 1	BSG_SELE	bsg_selp
8	Mac 5	L->R	Neu 1	CALM2_ABCA1	calm3a_abca1a
8	Mac 5	L->R	Neu 1	CALM2_ABCA1	calm3a_abca1b
8	Mac 5	L->R	Neu 1	CALM2_INSR	calm3a_insra
8	Mac 5	L->R	Neu 1	CALM2_KCNQ5	calm3a_kcnq5b
8	Mac 5	L->R	Neu 1	CALM2_ABCA1	calm2a_abca1a
8	Mac 5	L->R	Neu 1	CALM2_ABCA1	calm2a_abca1b
8	Mac 5	L->R	Neu 1	CALM2_INSR	calm2a_insra
8	Mac 5	L->R	Neu 1	CALM2_KCNQ5	calm2a_kcnq5b
8	Mac 5	L->R	Neu 1	CALR_ITGAV	calr_itgav
8	Mac 5	L->R	Neu 1	CD99_CD81	cd99_cd81a
8	Mac 5	L->R	Neu 1	CSF3_CSF3R	csf3a_csf3r
8	Mac 5	L->R	Neu 1	CSF3_CSF3R	csf3b_csf3r
8	Mac 5	L->R	Neu 1	F13A1_ITGA4	f13a1b_itga4
8	Mac 5	L->R	Neu 1	F13A1_ITGB1	f13a1b_CABZ01058721.1
8	Mac 5	L->R	Neu 1	F13A1_ITGB1	f13a1b_itgb1b
8	Mac 5	L->R	Neu 1	FN1_C5AR1	fn1a_CABZ01041494.1
8	Mac 5	L->R	Neu 1	FN1_CD44	fn1a_cd44b
8	Mac 5	L->R	Neu 1	FN1_ITGA4	fn1a_itga4
8	Mac 5	L->R	Neu 1	FN1_ITGAV	fn1a_itgav
8	Mac 5	L->R	Neu 1	FN1_ITGB1	fn1a_CABZ01058721.1
8	Mac 5	L->R	Neu 1	FN1_ITGB1	fn1a_itgb1b
8	Mac 5	L->R	Neu 1	GNAI2_ADCY7	gnai2b_adcy7
8	Mac 5	L->R	Neu 1	GNAI2_C5AR1	gnai2b_CABZ01041494.1
8	Mac 5	L->R	Neu 1	GNAI2_S1PR4	gnai2b_s1pr4
8	Mac 5	L->R	Neu 1	GNAI2_ADCY7	gnai2a_adcy7
8	Mac 5	L->R	Neu 1	GNAI2_C5AR1	gnai2a_CABZ01041494.1
8	Mac 5	L->R	Neu 1	GNAI2_S1PR4	gnai2a_s1pr4
8	Mac 5	L->R	Neu 1	GNAS_ADCY7	gnas_adcy7
8	Mac 5	L->R	Neu 1	GNAS_CRHR1	gnas_crhr1
8	Mac 5	L->R	Neu 1	GPI_AMFR	gpia_amfra
8	Mac 5	L->R	Neu 1	GRN_SORT1	grn1_sort1b
8	Mac 5	L->R	Neu 1	GRN_TNFRSF1A	grn1_fas
8	Mac 5	L->R	Neu 1	GRN_TNFRSF1B	grn1_tnfrsf1b
8	Mac 5	L->R	Neu 1	GRN_SORT1	grn2_sort1b
8	Mac 5	L->R	Neu 1	GRN_TNFRSF1A	grn2_fas
8	Mac 5	L->R	Neu 1	GRN_TNFRSF1B	grn2_tnfrsf1b
8	Mac 5	L->R	Neu 1	HBEGF_CD44	hbegfa_cd44b
8	Mac 5	L->R	Neu 1	HBEGF_CD82	hbegfa_cd82b
8	Mac 5	L->R	Neu 1	HBEGF_CD44	hbegfb_cd44b
8	Mac 5	L->R	Neu 1	HBEGF_CD82	hbegfb_cd82b
8	Mac 5	L->R	Neu 1	HMGB1_AGER	hmgb1b_si:ch211-79k12.1
8	Mac 5	L->R	Neu 1	HMGB1_CXCR4	hmgb1b_cxcr4a
8	Mac 5	L->R	Neu 1	HMGB1_CXCR4	hmgb1b_cxcr4b
8	Mac 5	L->R	Neu 1	HMGB1_AGER	hmgb1a_si:ch211-79k12.1
8	Mac 5	L->R	Neu 1	HMGB1_CXCR4	hmgb1a_cxcr4a
8	Mac 5	L->R	Neu 1	HMGB1_CXCR4	hmgb1a_cxcr4b
8	Mac 5	L->R	Neu 1	HSPG2_ITGB1	hspg2_CABZ01058721.1
8	Mac 5	L->R	Neu 1	HSPG2_ITGB1	hspg2_itgb1b
8	Mac 5	L->R	Neu 1	ICAM3_ITGB2	si:ch211-66e2.3_itgb2
8	Mac 5	L->R	Neu 1	ICAM3_ITGB2	si:ch73-208g10.1_itgb2
8	Mac 5	L->R	Neu 1	ICAM3_ITGB2	icam3_itgb2
8	Mac 5	L->R	Neu 1	IGF2_IGF2R	igf2b_igf2r
8	Mac 5	L->R	Neu 1	IGF2_INSR	igf2b_insra
8	Mac 5	L->R	Neu 1	IL16_CD4	il16_dicp1.3-4
8	Mac 5	L->R	Neu 1	IL16_CD4	il16_dicp3.3
8	Mac 5	L->R	Neu 1	IL16_CD4	il16_dicp3.1
8	Mac 5	L->R	Neu 1	IL1B_IL1R1	il1b_zmp:0000000936
8	Mac 5	L->R	Neu 1	INHBA_ACVR2A	inhbaa_acvr2aa
8	Mac 5	L->R	Neu 1	INHBA_SMAD3	inhbaa_smad3a
8	Mac 5	L->R	Neu 1	LIN7C_ABCA1	lin7c_abca1a
8	Mac 5	L->R	Neu 1	LIN7C_ABCA1	lin7c_abca1b
8	Mac 5	L->R	Neu 1	LRPAP1_SORT1	lrpap1_sort1b
8	Mac 5	L->R	Neu 1	MFNG_NOTCH2	mfng_notch2
8	Mac 5	L->R	Neu 1	MIF_CD44	mif_cd44b
8	Mac 5	L->R	Neu 1	MIF_CD74	mif_cd74a
8	Mac 5	L->R	Neu 1	MIF_CD74	mif_cd74b
8	Mac 5	L->R	Neu 1	MIF_CXCR4	mif_cxcr4a
8	Mac 5	L->R	Neu 1	MIF_CXCR4	mif_cxcr4b
8	Mac 5	L->R	Neu 1	MMP9_CD44	mmp9_cd44b
8	Mac 5	L->R	Neu 1	MMP9_ITGB2	mmp9_itgb2
8	Mac 5	L->R	Neu 1	NUCB2_ERAP1	nucb2a_erap1b
8	Mac 5	L->R	Neu 1	NUCB2_ERAP1	nucb2b_erap1b
8	Mac 5	L->R	Neu 1	PDGFB_ITGAV	pdgfba_itgav
8	Mac 5	L->R	Neu 1	PKM_CD44	pkma_cd44b
8	Mac 5	L->R	Neu 1	PSAP_SORT1	psap_sort1b
8	Mac 5	L->R	Neu 1	RPS19_C5AR1	rps19_CABZ01041494.1
8	Mac 5	L->R	Neu 1	SERPINE1_ITGAV	serpine1_itgav
8	Mac 5	L->R	Neu 1	TIMP2_CD44	timp2b_cd44b
8	Mac 5	L->R	Neu 1	TIMP2_ITGB1	timp2b_CABZ01058721.1
8	Mac 5	L->R	Neu 1	TIMP2_ITGB1	timp2b_itgb1b
8	Mac 5	L->R	Neu 1	TNF_TNFRSF1A	tnfb_fas
8	Mac 5	L->R	Neu 1	TNF_TNFRSF1B	tnfb_tnfrsf1b
8	Mac 5	L->R	Neu 1	TNF_TRADD	tnfb_tradd
8	Mac 5	L->R	Neu 1	UBA52_TGFBR1	uba52_tgfbr1b
9	Mac 5	L->R	Neu 2	ADAM10_CD44	adam10a_cd44b
9	Mac 5	L->R	Neu 2	ADAM10_IL6R	adam10a_il6r
9	Mac 5	L->R	Neu 2	ADAM10_NOTCH2	adam10a_notch2
9	Mac 5	L->R	Neu 2	ADAM10_TSPAN14	adam10a_tspan14
9	Mac 5	L->R	Neu 2	ADAM17_IL6R	adam17a_il6r
9	Mac 5	L->R	Neu 2	ADAM17_ITGB1	adam17a_itgb1b
9	Mac 5	L->R	Neu 2	ADAM9_ITGAV	adam9_itgav
9	Mac 5	L->R	Neu 2	ADAM9_ITGB1	adam9_itgb1b
9	Mac 5	L->R	Neu 2	AGTRAP_RACK1	agtrap_rack1
9	Mac 5	L->R	Neu 2	ALOX5AP_ALOX5	alox5ap_alox5a
9	Mac 5	L->R	Neu 2	APOE_ABCA1	apoeb_abca1a
9	Mac 5	L->R	Neu 2	APOE_ABCA1	apoeb_abca1b
9	Mac 5	L->R	Neu 2	APP_AGER	appa_si:ch211-79k12.1
9	Mac 5	L->R	Neu 2	APP_APLP2	appa_aplp2
9	Mac 5	L->R	Neu 2	APP_CD74	appa_cd74a
9	Mac 5	L->R	Neu 2	APP_CD74	appa_cd74b
9	Mac 5	L->R	Neu 2	APP_LRP10	appa_lrp10
9	Mac 5	L->R	Neu 2	APP_NOTCH2	appa_notch2
9	Mac 5	L->R	Neu 2	APP_RPSA	appa_rpsa
9	Mac 5	L->R	Neu 2	ARF6_SMAP1	arf6a_smap1
9	Mac 5	L->R	Neu 2	ARF6_SMAP1	arf6b_smap1
9	Mac 5	L->R	Neu 2	BSG_SELE	bsg_selp
9	Mac 5	L->R	Neu 2	CALM2_ABCA1	calm3a_abca1a
9	Mac 5	L->R	Neu 2	CALM2_ABCA1	calm3a_abca1b
9	Mac 5	L->R	Neu 2	CALM2_INSR	calm3a_insra
9	Mac 5	L->R	Neu 2	CALM2_KCNQ5	calm3a_kcnq5b
9	Mac 5	L->R	Neu 2	CALM2_ABCA1	calm2a_abca1a
9	Mac 5	L->R	Neu 2	CALM2_ABCA1	calm2a_abca1b
9	Mac 5	L->R	Neu 2	CALM2_INSR	calm2a_insra
9	Mac 5	L->R	Neu 2	CALM2_KCNQ5	calm2a_kcnq5b
9	Mac 5	L->R	Neu 2	CALR_ITGAV	calr_itgav
9	Mac 5	L->R	Neu 2	CD99_CD81	cd99_cd81a
9	Mac 5	L->R	Neu 2	CSF3_CSF3R	csf3a_csf3r
9	Mac 5	L->R	Neu 2	CSF3_CSF3R	csf3b_csf3r
9	Mac 5	L->R	Neu 2	CXCL9_CXCR3	BX323596.2_cxcr3.3
9	Mac 5	L->R	Neu 2	F13A1_ITGA4	f13a1b_itga4
9	Mac 5	L->R	Neu 2	F13A1_ITGB1	f13a1b_itgb1b
9	Mac 5	L->R	Neu 2	FN1_C5AR1	fn1a_CABZ01041494.1
9	Mac 5	L->R	Neu 2	FN1_CD44	fn1a_cd44b
9	Mac 5	L->R	Neu 2	FN1_ITGA4	fn1a_itga4
9	Mac 5	L->R	Neu 2	FN1_ITGAV	fn1a_itgav
9	Mac 5	L->R	Neu 2	FN1_ITGB1	fn1a_itgb1b
9	Mac 5	L->R	Neu 2	GNAI2_ADCY7	gnai2b_adcy7
9	Mac 5	L->R	Neu 2	GNAI2_C5AR1	gnai2b_CABZ01041494.1
9	Mac 5	L->R	Neu 2	GNAI2_CXCR3	gnai2b_cxcr3.3
9	Mac 5	L->R	Neu 2	GNAI2_S1PR4	gnai2b_s1pr4
9	Mac 5	L->R	Neu 2	GNAI2_ADCY7	gnai2a_adcy7
9	Mac 5	L->R	Neu 2	GNAI2_C5AR1	gnai2a_CABZ01041494.1
9	Mac 5	L->R	Neu 2	GNAI2_CXCR3	gnai2a_cxcr3.3
9	Mac 5	L->R	Neu 2	GNAI2_S1PR4	gnai2a_s1pr4
9	Mac 5	L->R	Neu 2	GNAS_ADCY7	gnas_adcy7
9	Mac 5	L->R	Neu 2	GNAS_CRHR1	gnas_crhr1
9	Mac 5	L->R	Neu 2	GPI_AMFR	gpia_amfra
9	Mac 5	L->R	Neu 2	GRN_SORT1	grn1_sort1b
9	Mac 5	L->R	Neu 2	GRN_TNFRSF1A	grn1_fas
9	Mac 5	L->R	Neu 2	GRN_TNFRSF1B	grn1_tnfrsf1b
9	Mac 5	L->R	Neu 2	GRN_SORT1	grn2_sort1b
9	Mac 5	L->R	Neu 2	GRN_TNFRSF1A	grn2_fas
9	Mac 5	L->R	Neu 2	GRN_TNFRSF1B	grn2_tnfrsf1b
9	Mac 5	L->R	Neu 2	HBEGF_CD44	hbegfa_cd44b
9	Mac 5	L->R	Neu 2	HBEGF_CD82	hbegfa_cd82a
9	Mac 5	L->R	Neu 2	HBEGF_CD82	hbegfa_cd82b
9	Mac 5	L->R	Neu 2	HBEGF_CD44	hbegfb_cd44b
9	Mac 5	L->R	Neu 2	HBEGF_CD82	hbegfb_cd82a
9	Mac 5	L->R	Neu 2	HBEGF_CD82	hbegfb_cd82b
9	Mac 5	L->R	Neu 2	HMGB1_AGER	hmgb1b_si:ch211-79k12.1
9	Mac 5	L->R	Neu 2	HMGB1_CXCR4	hmgb1b_cxcr4b
9	Mac 5	L->R	Neu 2	HMGB1_AGER	hmgb1a_si:ch211-79k12.1
9	Mac 5	L->R	Neu 2	HMGB1_CXCR4	hmgb1a_cxcr4b
9	Mac 5	L->R	Neu 2	HSPG2_ITGB1	hspg2_itgb1b
9	Mac 5	L->R	Neu 2	ICAM3_ITGB2	si:ch211-66e2.3_itgb2
9	Mac 5	L->R	Neu 2	ICAM3_ITGB2	si:ch73-208g10.1_itgb2
9	Mac 5	L->R	Neu 2	ICAM3_ITGB2	icam3_itgb2
9	Mac 5	L->R	Neu 2	IGF2_IGF2R	igf2b_igf2r
9	Mac 5	L->R	Neu 2	IGF2_INSR	igf2b_insra
9	Mac 5	L->R	Neu 2	IL16_CD4	il16_dicp1.3-4
9	Mac 5	L->R	Neu 2	IL16_CD4	il16_dicp3.3
9	Mac 5	L->R	Neu 2	IL16_CD4	il16_dicp3.1
9	Mac 5	L->R	Neu 2	IL1B_IL1R1	il1b_CABZ01054965.1
9	Mac 5	L->R	Neu 2	IL1B_IL1R1	il1b_zmp:0000000936
9	Mac 5	L->R	Neu 2	INHBA_ACVR2A	inhbaa_acvr2aa
9	Mac 5	L->R	Neu 2	INHBA_SMAD3	inhbaa_smad3a
9	Mac 5	L->R	Neu 2	LIN7C_ABCA1	lin7c_abca1a
9	Mac 5	L->R	Neu 2	LIN7C_ABCA1	lin7c_abca1b
9	Mac 5	L->R	Neu 2	LRPAP1_SORT1	lrpap1_sort1b
9	Mac 5	L->R	Neu 2	MFNG_NOTCH2	mfng_notch2
9	Mac 5	L->R	Neu 2	MIF_CD44	mif_cd44b
9	Mac 5	L->R	Neu 2	MIF_CD74	mif_cd74a
9	Mac 5	L->R	Neu 2	MIF_CD74	mif_cd74b
9	Mac 5	L->R	Neu 2	MIF_CXCR4	mif_cxcr4b
9	Mac 5	L->R	Neu 2	MMP9_CD44	mmp9_cd44b
9	Mac 5	L->R	Neu 2	MMP9_ITGB2	mmp9_itgb2
9	Mac 5	L->R	Neu 2	NUCB2_ERAP1	nucb2a_erap1b
9	Mac 5	L->R	Neu 2	NUCB2_ERAP1	nucb2b_erap1b
9	Mac 5	L->R	Neu 2	PDGFB_ITGAV	pdgfba_itgav
9	Mac 5	L->R	Neu 2	PKM_CD44	pkma_cd44b
9	Mac 5	L->R	Neu 2	PSAP_SORT1	psap_sort1b
9	Mac 5	L->R	Neu 2	RPS19_C5AR1	rps19_CABZ01041494.1
9	Mac 5	L->R	Neu 2	SERPINE1_ITGAV	serpine1_itgav
9	Mac 5	L->R	Neu 2	TIMP2_CD44	timp2b_cd44b
9	Mac 5	L->R	Neu 2	TIMP2_ITGB1	timp2b_itgb1b
9	Mac 5	L->R	Neu 2	TNF_TNFRSF1A	tnfb_fas
9	Mac 5	L->R	Neu 2	TNF_TNFRSF1B	tnfb_tnfrsf1b
9	Mac 5	L->R	Neu 2	TNF_TRADD	tnfb_tradd
10	Mac 6	L->R	Neu 1	ADAM10_CD44	adam10a_cd44b
10	Mac 6	L->R	Neu 1	ADAM10_IL6R	adam10a_il6r
10	Mac 6	L->R	Neu 1	ADAM10_NOTCH2	adam10a_notch2
10	Mac 6	L->R	Neu 1	ADAM10_TSPAN14	adam10a_tspan14
10	Mac 6	L->R	Neu 1	ADAM17_IL6R	adam17a_il6r
10	Mac 6	L->R	Neu 1	ADAM17_ITGB1	adam17a_CABZ01058721.1
10	Mac 6	L->R	Neu 1	ADAM17_ITGB1	adam17a_itgb1b
10	Mac 6	L->R	Neu 1	ADAM28_ITGA4	adam28_itga4
10	Mac 6	L->R	Neu 1	ADAM9_ITGAV	adam9_itgav
10	Mac 6	L->R	Neu 1	ADAM9_ITGB1	adam9_CABZ01058721.1
10	Mac 6	L->R	Neu 1	ADAM9_ITGB1	adam9_itgb1b
10	Mac 6	L->R	Neu 1	ADM_GPR84	adma_gpr84
10	Mac 6	L->R	Neu 1	AGTRAP_RACK1	agtrap_rack1
10	Mac 6	L->R	Neu 1	ALOX5AP_ALOX5	alox5ap_alox5a
10	Mac 6	L->R	Neu 1	APOE_ABCA1	apoeb_abca1a
10	Mac 6	L->R	Neu 1	APOE_ABCA1	apoeb_abca1b
10	Mac 6	L->R	Neu 1	APP_AGER	appa_si:ch211-79k12.1
10	Mac 6	L->R	Neu 1	APP_APLP2	appa_aplp2
10	Mac 6	L->R	Neu 1	APP_CD74	appa_cd74a
10	Mac 6	L->R	Neu 1	APP_CD74	appa_cd74b
10	Mac 6	L->R	Neu 1	APP_LRP10	appa_lrp10
10	Mac 6	L->R	Neu 1	APP_NOTCH2	appa_notch2
10	Mac 6	L->R	Neu 1	APP_RPSA	appa_rpsa
10	Mac 6	L->R	Neu 1	ARF6_SMAP1	arf6a_smap1
10	Mac 6	L->R	Neu 1	ARF6_SMAP1	arf6b_smap1
10	Mac 6	L->R	Neu 1	BSG_SELE	bsg_selp
10	Mac 6	L->R	Neu 1	CALM2_ABCA1	calm3a_abca1a
10	Mac 6	L->R	Neu 1	CALM2_ABCA1	calm3a_abca1b
10	Mac 6	L->R	Neu 1	CALM2_INSR	calm3a_insra
10	Mac 6	L->R	Neu 1	CALM2_KCNQ5	calm3a_kcnq5b
10	Mac 6	L->R	Neu 1	CALM2_ABCA1	calm2a_abca1a
10	Mac 6	L->R	Neu 1	CALM2_ABCA1	calm2a_abca1b
10	Mac 6	L->R	Neu 1	CALM2_INSR	calm2a_insra
10	Mac 6	L->R	Neu 1	CALM2_KCNQ5	calm2a_kcnq5b
10	Mac 6	L->R	Neu 1	CALR_ITGAV	calr_itgav
10	Mac 6	L->R	Neu 1	CD99_CD81	cd99_cd81a
10	Mac 6	L->R	Neu 1	CSF3_CSF3R	csf3a_csf3r
10	Mac 6	L->R	Neu 1	CSF3_CSF3R	csf3b_csf3r
10	Mac 6	L->R	Neu 1	F13A1_ITGA4	f13a1b_itga4
10	Mac 6	L->R	Neu 1	F13A1_ITGB1	f13a1b_CABZ01058721.1
10	Mac 6	L->R	Neu 1	F13A1_ITGB1	f13a1b_itgb1b
10	Mac 6	L->R	Neu 1	FN1_C5AR1	fn1a_CABZ01041494.1
10	Mac 6	L->R	Neu 1	FN1_CD44	fn1a_cd44b
10	Mac 6	L->R	Neu 1	FN1_ITGA4	fn1a_itga4
10	Mac 6	L->R	Neu 1	FN1_ITGAV	fn1a_itgav
10	Mac 6	L->R	Neu 1	FN1_ITGB1	fn1a_CABZ01058721.1
10	Mac 6	L->R	Neu 1	FN1_ITGB1	fn1a_itgb1b
10	Mac 6	L->R	Neu 1	GNAI2_ADCY7	gnai2b_adcy7
10	Mac 6	L->R	Neu 1	GNAI2_C5AR1	gnai2b_CABZ01041494.1
10	Mac 6	L->R	Neu 1	GNAI2_S1PR4	gnai2b_s1pr4
10	Mac 6	L->R	Neu 1	GNAI2_ADCY7	gnai2a_adcy7
10	Mac 6	L->R	Neu 1	GNAI2_C5AR1	gnai2a_CABZ01041494.1
10	Mac 6	L->R	Neu 1	GNAI2_S1PR4	gnai2a_s1pr4
10	Mac 6	L->R	Neu 1	GNAS_ADCY7	gnas_adcy7
10	Mac 6	L->R	Neu 1	GNAS_CRHR1	gnas_crhr1
10	Mac 6	L->R	Neu 1	GPI_AMFR	gpia_amfra
10	Mac 6	L->R	Neu 1	GRN_SORT1	grn1_sort1b
10	Mac 6	L->R	Neu 1	GRN_TNFRSF1A	grn1_fas
10	Mac 6	L->R	Neu 1	GRN_TNFRSF1B	grn1_tnfrsf1b
10	Mac 6	L->R	Neu 1	GRN_SORT1	grn2_sort1b
10	Mac 6	L->R	Neu 1	GRN_TNFRSF1A	grn2_fas
10	Mac 6	L->R	Neu 1	GRN_TNFRSF1B	grn2_tnfrsf1b
10	Mac 6	L->R	Neu 1	HBEGF_CD44	hbegfa_cd44b
10	Mac 6	L->R	Neu 1	HBEGF_CD82	hbegfa_cd82b
10	Mac 6	L->R	Neu 1	HMGB1_AGER	hmgb1a_si:ch211-79k12.1
10	Mac 6	L->R	Neu 1	HMGB1_CXCR4	hmgb1a_cxcr4a
10	Mac 6	L->R	Neu 1	HMGB1_CXCR4	hmgb1a_cxcr4b
10	Mac 6	L->R	Neu 1	ICAM3_ITGB2	si:ch211-66e2.3_itgb2
10	Mac 6	L->R	Neu 1	ICAM3_ITGB2	si:ch73-208g10.1_itgb2
10	Mac 6	L->R	Neu 1	ICAM3_ITGB2	icam3_itgb2
10	Mac 6	L->R	Neu 1	IGF2_IGF2R	igf2b_igf2r
10	Mac 6	L->R	Neu 1	IGF2_INSR	igf2b_insra
10	Mac 6	L->R	Neu 1	IL16_CD4	il16_dicp1.3-4
10	Mac 6	L->R	Neu 1	IL16_CD4	il16_dicp3.3
10	Mac 6	L->R	Neu 1	IL16_CD4	il16_dicp3.1
10	Mac 6	L->R	Neu 1	IL1B_IL1R1	il1b_zmp:0000000936
10	Mac 6	L->R	Neu 1	INHBA_ACVR2A	inhbaa_acvr2aa
10	Mac 6	L->R	Neu 1	INHBA_SMAD3	inhbaa_smad3a
10	Mac 6	L->R	Neu 1	LIN7C_ABCA1	lin7c_abca1a
10	Mac 6	L->R	Neu 1	LIN7C_ABCA1	lin7c_abca1b
10	Mac 6	L->R	Neu 1	LRPAP1_SORT1	lrpap1_sort1b
10	Mac 6	L->R	Neu 1	LTF_TFRC	tfa_tfr1b
10	Mac 6	L->R	Neu 1	MFNG_NOTCH2	mfng_notch2
10	Mac 6	L->R	Neu 1	MIF_CD44	mif_cd44b
10	Mac 6	L->R	Neu 1	MIF_CD74	mif_cd74a
10	Mac 6	L->R	Neu 1	MIF_CD74	mif_cd74b
10	Mac 6	L->R	Neu 1	MIF_CXCR4	mif_cxcr4a
10	Mac 6	L->R	Neu 1	MIF_CXCR4	mif_cxcr4b
10	Mac 6	L->R	Neu 1	MMP1_CD44	mmp13a_cd44b
10	Mac 6	L->R	Neu 1	MMP9_CD44	mmp9_cd44b
10	Mac 6	L->R	Neu 1	MMP9_ITGB2	mmp9_itgb2
10	Mac 6	L->R	Neu 1	NUCB2_ERAP1	nucb2a_erap1b
10	Mac 6	L->R	Neu 1	NUCB2_ERAP1	nucb2b_erap1b
10	Mac 6	L->R	Neu 1	PDGFB_ITGAV	pdgfba_itgav
10	Mac 6	L->R	Neu 1	PKM_CD44	pkma_cd44b
10	Mac 6	L->R	Neu 1	PSAP_SORT1	psap_sort1b
10	Mac 6	L->R	Neu 1	RPS19_C5AR1	rps19_CABZ01041494.1
10	Mac 6	L->R	Neu 1	SERPINE1_ITGAV	serpine1_itgav
10	Mac 6	L->R	Neu 1	TIMP2_CD44	timp2b_cd44b
10	Mac 6	L->R	Neu 1	TIMP2_ITGB1	timp2b_CABZ01058721.1
10	Mac 6	L->R	Neu 1	TIMP2_ITGB1	timp2b_itgb1b
10	Mac 6	L->R	Neu 1	TNF_TNFRSF1A	tnfb_fas
10	Mac 6	L->R	Neu 1	TNF_TNFRSF1B	tnfb_tnfrsf1b
10	Mac 6	L->R	Neu 1	TNF_TRADD	tnfb_tradd
10	Mac 6	L->R	Neu 1	UBA52_TGFBR1	uba52_tgfbr1b
11	Mac 6	L->R	Neu 2	ADAM10_CD44	adam10a_cd44b
11	Mac 6	L->R	Neu 2	ADAM10_IL6R	adam10a_il6r
11	Mac 6	L->R	Neu 2	ADAM10_NOTCH2	adam10a_notch2
11	Mac 6	L->R	Neu 2	ADAM10_TSPAN14	adam10a_tspan14
11	Mac 6	L->R	Neu 2	ADAM17_IL6R	adam17a_il6r
11	Mac 6	L->R	Neu 2	ADAM17_ITGB1	adam17a_itgb1b
11	Mac 6	L->R	Neu 2	ADAM28_ITGA4	adam28_itga4
11	Mac 6	L->R	Neu 2	ADAM9_ITGAV	adam9_itgav
11	Mac 6	L->R	Neu 2	ADAM9_ITGB1	adam9_itgb1b
11	Mac 6	L->R	Neu 2	ADM_GPR84	adma_gpr84
11	Mac 6	L->R	Neu 2	AGTRAP_RACK1	agtrap_rack1
11	Mac 6	L->R	Neu 2	ALOX5AP_ALOX5	alox5ap_alox5a
11	Mac 6	L->R	Neu 2	APOE_ABCA1	apoeb_abca1a
11	Mac 6	L->R	Neu 2	APOE_ABCA1	apoeb_abca1b
11	Mac 6	L->R	Neu 2	APP_AGER	appa_si:ch211-79k12.1
11	Mac 6	L->R	Neu 2	APP_APLP2	appa_aplp2
11	Mac 6	L->R	Neu 2	APP_CD74	appa_cd74a
11	Mac 6	L->R	Neu 2	APP_CD74	appa_cd74b
11	Mac 6	L->R	Neu 2	APP_LRP10	appa_lrp10
11	Mac 6	L->R	Neu 2	APP_NOTCH2	appa_notch2
11	Mac 6	L->R	Neu 2	APP_RPSA	appa_rpsa
11	Mac 6	L->R	Neu 2	ARF6_SMAP1	arf6a_smap1
11	Mac 6	L->R	Neu 2	ARF6_SMAP1	arf6b_smap1
11	Mac 6	L->R	Neu 2	BSG_SELE	bsg_selp
11	Mac 6	L->R	Neu 2	CALM2_ABCA1	calm3a_abca1a
11	Mac 6	L->R	Neu 2	CALM2_ABCA1	calm3a_abca1b
11	Mac 6	L->R	Neu 2	CALM2_INSR	calm3a_insra
11	Mac 6	L->R	Neu 2	CALM2_KCNQ5	calm3a_kcnq5b
11	Mac 6	L->R	Neu 2	CALM2_ABCA1	calm2a_abca1a
11	Mac 6	L->R	Neu 2	CALM2_ABCA1	calm2a_abca1b
11	Mac 6	L->R	Neu 2	CALM2_INSR	calm2a_insra
11	Mac 6	L->R	Neu 2	CALM2_KCNQ5	calm2a_kcnq5b
11	Mac 6	L->R	Neu 2	CALR_ITGAV	calr_itgav
11	Mac 6	L->R	Neu 2	CD99_CD81	cd99_cd81a
11	Mac 6	L->R	Neu 2	CSF3_CSF3R	csf3a_csf3r
11	Mac 6	L->R	Neu 2	CSF3_CSF3R	csf3b_csf3r
11	Mac 6	L->R	Neu 2	CXCL9_CXCR3	BX323596.2_cxcr3.3
11	Mac 6	L->R	Neu 2	F13A1_ITGA4	f13a1b_itga4
11	Mac 6	L->R	Neu 2	F13A1_ITGB1	f13a1b_itgb1b
11	Mac 6	L->R	Neu 2	FN1_C5AR1	fn1a_CABZ01041494.1
11	Mac 6	L->R	Neu 2	FN1_CD44	fn1a_cd44b
11	Mac 6	L->R	Neu 2	FN1_ITGA4	fn1a_itga4
11	Mac 6	L->R	Neu 2	FN1_ITGAV	fn1a_itgav
11	Mac 6	L->R	Neu 2	FN1_ITGB1	fn1a_itgb1b
11	Mac 6	L->R	Neu 2	GNAI2_ADCY7	gnai2b_adcy7
11	Mac 6	L->R	Neu 2	GNAI2_C5AR1	gnai2b_CABZ01041494.1
11	Mac 6	L->R	Neu 2	GNAI2_CXCR3	gnai2b_cxcr3.3
11	Mac 6	L->R	Neu 2	GNAI2_S1PR4	gnai2b_s1pr4
11	Mac 6	L->R	Neu 2	GNAI2_ADCY7	gnai2a_adcy7
11	Mac 6	L->R	Neu 2	GNAI2_C5AR1	gnai2a_CABZ01041494.1
11	Mac 6	L->R	Neu 2	GNAI2_CXCR3	gnai2a_cxcr3.3
11	Mac 6	L->R	Neu 2	GNAI2_S1PR4	gnai2a_s1pr4
11	Mac 6	L->R	Neu 2	GNAS_ADCY7	gnas_adcy7
11	Mac 6	L->R	Neu 2	GNAS_CRHR1	gnas_crhr1
11	Mac 6	L->R	Neu 2	GPI_AMFR	gpia_amfra
11	Mac 6	L->R	Neu 2	GRN_SORT1	grn1_sort1b
11	Mac 6	L->R	Neu 2	GRN_TNFRSF1A	grn1_fas
11	Mac 6	L->R	Neu 2	GRN_TNFRSF1B	grn1_tnfrsf1b
11	Mac 6	L->R	Neu 2	GRN_SORT1	grn2_sort1b
11	Mac 6	L->R	Neu 2	GRN_TNFRSF1A	grn2_fas
11	Mac 6	L->R	Neu 2	GRN_TNFRSF1B	grn2_tnfrsf1b
11	Mac 6	L->R	Neu 2	HBEGF_CD44	hbegfa_cd44b
11	Mac 6	L->R	Neu 2	HBEGF_CD82	hbegfa_cd82a
11	Mac 6	L->R	Neu 2	HBEGF_CD82	hbegfa_cd82b
11	Mac 6	L->R	Neu 2	HMGB1_AGER	hmgb1a_si:ch211-79k12.1
11	Mac 6	L->R	Neu 2	HMGB1_CXCR4	hmgb1a_cxcr4b
11	Mac 6	L->R	Neu 2	ICAM3_ITGB2	si:ch211-66e2.3_itgb2
11	Mac 6	L->R	Neu 2	ICAM3_ITGB2	si:ch73-208g10.1_itgb2
11	Mac 6	L->R	Neu 2	ICAM3_ITGB2	icam3_itgb2
11	Mac 6	L->R	Neu 2	IGF2_IGF2R	igf2b_igf2r
11	Mac 6	L->R	Neu 2	IGF2_INSR	igf2b_insra
11	Mac 6	L->R	Neu 2	IL16_CD4	il16_dicp1.3-4
11	Mac 6	L->R	Neu 2	IL16_CD4	il16_dicp3.3
11	Mac 6	L->R	Neu 2	IL16_CD4	il16_dicp3.1
11	Mac 6	L->R	Neu 2	IL1B_IL1R1	il1b_CABZ01054965.1
11	Mac 6	L->R	Neu 2	IL1B_IL1R1	il1b_zmp:0000000936
11	Mac 6	L->R	Neu 2	INHBA_ACVR2A	inhbaa_acvr2aa
11	Mac 6	L->R	Neu 2	INHBA_SMAD3	inhbaa_smad3a
11	Mac 6	L->R	Neu 2	LIN7C_ABCA1	lin7c_abca1a
11	Mac 6	L->R	Neu 2	LIN7C_ABCA1	lin7c_abca1b
11	Mac 6	L->R	Neu 2	LRPAP1_SORT1	lrpap1_sort1b
11	Mac 6	L->R	Neu 2	LTF_TFRC	tfa_tfr1b
11	Mac 6	L->R	Neu 2	MFNG_NOTCH2	mfng_notch2
11	Mac 6	L->R	Neu 2	MIF_CD44	mif_cd44b
11	Mac 6	L->R	Neu 2	MIF_CD74	mif_cd74a
11	Mac 6	L->R	Neu 2	MIF_CD74	mif_cd74b
11	Mac 6	L->R	Neu 2	MIF_CXCR4	mif_cxcr4b
11	Mac 6	L->R	Neu 2	MMP1_CD44	mmp13a_cd44b
11	Mac 6	L->R	Neu 2	MMP9_CD44	mmp9_cd44b
11	Mac 6	L->R	Neu 2	MMP9_ITGB2	mmp9_itgb2
11	Mac 6	L->R	Neu 2	NUCB2_ERAP1	nucb2a_erap1b
11	Mac 6	L->R	Neu 2	NUCB2_ERAP1	nucb2b_erap1b
11	Mac 6	L->R	Neu 2	PDGFB_ITGAV	pdgfba_itgav
11	Mac 6	L->R	Neu 2	PKM_CD44	pkma_cd44b
11	Mac 6	L->R	Neu 2	PSAP_SORT1	psap_sort1b
11	Mac 6	L->R	Neu 2	RPS19_C5AR1	rps19_CABZ01041494.1
11	Mac 6	L->R	Neu 2	SERPINE1_ITGAV	serpine1_itgav
11	Mac 6	L->R	Neu 2	TIMP2_CD44	timp2b_cd44b
11	Mac 6	L->R	Neu 2	TIMP2_ITGB1	timp2b_itgb1b
11	Mac 6	L->R	Neu 2	TNF_TNFRSF1A	tnfb_fas
11	Mac 6	L->R	Neu 2	TNF_TNFRSF1B	tnfb_tnfrsf1b
11	Mac 6	L->R	Neu 2	TNF_TRADD	tnfb_tradd
12	Mac 7	L->R	Neu 1	ADAM10_CD44	adam10a_cd44b
12	Mac 7	L->R	Neu 1	ADAM10_IL6R	adam10a_il6r
12	Mac 7	L->R	Neu 1	ADAM10_NOTCH2	adam10a_notch2
12	Mac 7	L->R	Neu 1	ADAM10_TSPAN14	adam10a_tspan14
12	Mac 7	L->R	Neu 1	ADAM9_ITGAV	adam9_itgav
12	Mac 7	L->R	Neu 1	ADAM9_ITGB1	adam9_CABZ01058721.1
12	Mac 7	L->R	Neu 1	ADAM9_ITGB1	adam9_itgb1b
12	Mac 7	L->R	Neu 1	AGTRAP_RACK1	agtrap_rack1
12	Mac 7	L->R	Neu 1	ALOX5AP_ALOX5	alox5ap_alox5a
12	Mac 7	L->R	Neu 1	APOE_ABCA1	apoeb_abca1a
12	Mac 7	L->R	Neu 1	APOE_ABCA1	apoeb_abca1b
12	Mac 7	L->R	Neu 1	ARF6_SMAP1	arf6a_smap1
12	Mac 7	L->R	Neu 1	ARF6_SMAP1	arf6b_smap1
12	Mac 7	L->R	Neu 1	BSG_SELE	bsg_selp
12	Mac 7	L->R	Neu 1	CALM2_ABCA1	calm3a_abca1a
12	Mac 7	L->R	Neu 1	CALM2_ABCA1	calm3a_abca1b
12	Mac 7	L->R	Neu 1	CALM2_INSR	calm3a_insra
12	Mac 7	L->R	Neu 1	CALM2_KCNQ5	calm3a_kcnq5b
12	Mac 7	L->R	Neu 1	CALM2_ABCA1	calm2a_abca1a
12	Mac 7	L->R	Neu 1	CALM2_ABCA1	calm2a_abca1b
12	Mac 7	L->R	Neu 1	CALM2_INSR	calm2a_insra
12	Mac 7	L->R	Neu 1	CALM2_KCNQ5	calm2a_kcnq5b
12	Mac 7	L->R	Neu 1	CD99_CD81	cd99_cd81a
12	Mac 7	L->R	Neu 1	F13A1_ITGA4	f13a1b_itga4
12	Mac 7	L->R	Neu 1	F13A1_ITGB1	f13a1b_CABZ01058721.1
12	Mac 7	L->R	Neu 1	F13A1_ITGB1	f13a1b_itgb1b
12	Mac 7	L->R	Neu 1	FN1_C5AR1	fn1a_CABZ01041494.1
12	Mac 7	L->R	Neu 1	FN1_CD44	fn1a_cd44b
12	Mac 7	L->R	Neu 1	FN1_ITGA4	fn1a_itga4
12	Mac 7	L->R	Neu 1	FN1_ITGAV	fn1a_itgav
12	Mac 7	L->R	Neu 1	FN1_ITGB1	fn1a_CABZ01058721.1
12	Mac 7	L->R	Neu 1	FN1_ITGB1	fn1a_itgb1b
12	Mac 7	L->R	Neu 1	GNAI2_ADCY7	gnai2a_adcy7
12	Mac 7	L->R	Neu 1	GNAI2_C5AR1	gnai2a_CABZ01041494.1
12	Mac 7	L->R	Neu 1	GNAI2_S1PR4	gnai2a_s1pr4
12	Mac 7	L->R	Neu 1	GNAS_ADCY7	gnas_adcy7
12	Mac 7	L->R	Neu 1	GNAS_CRHR1	gnas_crhr1
12	Mac 7	L->R	Neu 1	GPI_AMFR	gpia_amfra
12	Mac 7	L->R	Neu 1	GRN_SORT1	grn1_sort1b
12	Mac 7	L->R	Neu 1	GRN_TNFRSF1A	grn1_fas
12	Mac 7	L->R	Neu 1	GRN_TNFRSF1B	grn1_tnfrsf1b
12	Mac 7	L->R	Neu 1	GRN_SORT1	grn2_sort1b
12	Mac 7	L->R	Neu 1	GRN_TNFRSF1A	grn2_fas
12	Mac 7	L->R	Neu 1	GRN_TNFRSF1B	grn2_tnfrsf1b
12	Mac 7	L->R	Neu 1	HBEGF_CD44	hbegfa_cd44b
12	Mac 7	L->R	Neu 1	HBEGF_CD82	hbegfa_cd82b
12	Mac 7	L->R	Neu 1	HBEGF_CD44	hbegfb_cd44b
12	Mac 7	L->R	Neu 1	HBEGF_CD82	hbegfb_cd82b
12	Mac 7	L->R	Neu 1	HMGB1_AGER	hmgb1a_si:ch211-79k12.1
12	Mac 7	L->R	Neu 1	HMGB1_CXCR4	hmgb1a_cxcr4a
12	Mac 7	L->R	Neu 1	HMGB1_CXCR4	hmgb1a_cxcr4b
12	Mac 7	L->R	Neu 1	HRAS_INSR	hrasa_insra
12	Mac 7	L->R	Neu 1	ICAM3_ITGB2	si:ch211-66e2.3_itgb2
12	Mac 7	L->R	Neu 1	ICAM3_ITGB2	icam3_itgb2
12	Mac 7	L->R	Neu 1	IGF2_IGF2R	igf2b_igf2r
12	Mac 7	L->R	Neu 1	IGF2_INSR	igf2b_insra
12	Mac 7	L->R	Neu 1	IL16_CD4	il16_dicp1.3-4
12	Mac 7	L->R	Neu 1	IL16_CD4	il16_dicp3.3
12	Mac 7	L->R	Neu 1	IL16_CD4	il16_dicp3.1
12	Mac 7	L->R	Neu 1	IL1B_IL1R1	il1b_zmp:0000000936
12	Mac 7	L->R	Neu 1	LAMB1_ITGAV	lamb1b_itgav
12	Mac 7	L->R	Neu 1	LAMB1_ITGB1	lamb1b_CABZ01058721.1
12	Mac 7	L->R	Neu 1	LAMB1_ITGB1	lamb1b_itgb1b
12	Mac 7	L->R	Neu 1	LRPAP1_SORT1	lrpap1_sort1b
12	Mac 7	L->R	Neu 1	MFGE8_ITGAV	mfge8a_itgav
12	Mac 7	L->R	Neu 1	MFNG_NOTCH2	mfng_notch2
12	Mac 7	L->R	Neu 1	MIF_CD44	mif_cd44b
12	Mac 7	L->R	Neu 1	MIF_CD74	mif_cd74a
12	Mac 7	L->R	Neu 1	MIF_CD74	mif_cd74b
12	Mac 7	L->R	Neu 1	MIF_CXCR4	mif_cxcr4a
12	Mac 7	L->R	Neu 1	MIF_CXCR4	mif_cxcr4b
12	Mac 7	L->R	Neu 1	MMP9_CD44	mmp9_cd44b
12	Mac 7	L->R	Neu 1	MMP9_ITGB2	mmp9_itgb2
12	Mac 7	L->R	Neu 1	NUCB2_ERAP1	nucb2a_erap1b
12	Mac 7	L->R	Neu 1	PDGFB_ITGAV	pdgfba_itgav
12	Mac 7	L->R	Neu 1	PKM_CD44	pkma_cd44b
12	Mac 7	L->R	Neu 1	PSAP_SORT1	psap_sort1b
12	Mac 7	L->R	Neu 1	RPS19_C5AR1	rps19_CABZ01041494.1
12	Mac 7	L->R	Neu 1	SERPINE1_ITGAV	serpine1_itgav
12	Mac 7	L->R	Neu 1	TIMP2_CD44	timp2b_cd44b
12	Mac 7	L->R	Neu 1	TIMP2_ITGB1	timp2b_CABZ01058721.1
12	Mac 7	L->R	Neu 1	TIMP2_ITGB1	timp2b_itgb1b
12	Mac 7	L->R	Neu 1	UBA52_TGFBR1	uba52_tgfbr1b
13	Mac 7	L->R	Neu 2	ADAM10_CD44	adam10a_cd44b
13	Mac 7	L->R	Neu 2	ADAM10_IL6R	adam10a_il6r
13	Mac 7	L->R	Neu 2	ADAM10_NOTCH2	adam10a_notch2
13	Mac 7	L->R	Neu 2	ADAM10_TSPAN14	adam10a_tspan14
13	Mac 7	L->R	Neu 2	ADAM9_ITGAV	adam9_itgav
13	Mac 7	L->R	Neu 2	ADAM9_ITGB1	adam9_itgb1b
13	Mac 7	L->R	Neu 2	AGTRAP_RACK1	agtrap_rack1
13	Mac 7	L->R	Neu 2	ALOX5AP_ALOX5	alox5ap_alox5a
13	Mac 7	L->R	Neu 2	APOE_ABCA1	apoeb_abca1a
13	Mac 7	L->R	Neu 2	APOE_ABCA1	apoeb_abca1b
13	Mac 7	L->R	Neu 2	ARF6_SMAP1	arf6a_smap1
13	Mac 7	L->R	Neu 2	ARF6_SMAP1	arf6b_smap1
13	Mac 7	L->R	Neu 2	BSG_SELE	bsg_selp
13	Mac 7	L->R	Neu 2	CALM2_ABCA1	calm3a_abca1a
13	Mac 7	L->R	Neu 2	CALM2_ABCA1	calm3a_abca1b
13	Mac 7	L->R	Neu 2	CALM2_INSR	calm3a_insra
13	Mac 7	L->R	Neu 2	CALM2_KCNQ5	calm3a_kcnq5b
13	Mac 7	L->R	Neu 2	CALM2_ABCA1	calm2a_abca1a
13	Mac 7	L->R	Neu 2	CALM2_ABCA1	calm2a_abca1b
13	Mac 7	L->R	Neu 2	CALM2_INSR	calm2a_insra
13	Mac 7	L->R	Neu 2	CALM2_KCNQ5	calm2a_kcnq5b
13	Mac 7	L->R	Neu 2	CD99_CD81	cd99_cd81a
13	Mac 7	L->R	Neu 2	CXCL9_CXCR3	BX323596.1_cxcr3.3
13	Mac 7	L->R	Neu 2	CXCL9_CXCR3	BX323596.2_cxcr3.3
13	Mac 7	L->R	Neu 2	F13A1_ITGA4	f13a1b_itga4
13	Mac 7	L->R	Neu 2	F13A1_ITGB1	f13a1b_itgb1b
13	Mac 7	L->R	Neu 2	FN1_C5AR1	fn1a_CABZ01041494.1
13	Mac 7	L->R	Neu 2	FN1_CD44	fn1a_cd44b
13	Mac 7	L->R	Neu 2	FN1_ITGA4	fn1a_itga4
13	Mac 7	L->R	Neu 2	FN1_ITGAV	fn1a_itgav
13	Mac 7	L->R	Neu 2	FN1_ITGB1	fn1a_itgb1b
13	Mac 7	L->R	Neu 2	GNAI2_ADCY7	gnai2a_adcy7
13	Mac 7	L->R	Neu 2	GNAI2_C5AR1	gnai2a_CABZ01041494.1
13	Mac 7	L->R	Neu 2	GNAI2_CXCR3	gnai2a_cxcr3.3
13	Mac 7	L->R	Neu 2	GNAI2_S1PR4	gnai2a_s1pr4
13	Mac 7	L->R	Neu 2	GNAS_ADCY7	gnas_adcy7
13	Mac 7	L->R	Neu 2	GNAS_CRHR1	gnas_crhr1
13	Mac 7	L->R	Neu 2	GPI_AMFR	gpia_amfra
13	Mac 7	L->R	Neu 2	GRN_SORT1	grn1_sort1b
13	Mac 7	L->R	Neu 2	GRN_TNFRSF1A	grn1_fas
13	Mac 7	L->R	Neu 2	GRN_TNFRSF1B	grn1_tnfrsf1b
13	Mac 7	L->R	Neu 2	GRN_SORT1	grn2_sort1b
13	Mac 7	L->R	Neu 2	GRN_TNFRSF1A	grn2_fas
13	Mac 7	L->R	Neu 2	GRN_TNFRSF1B	grn2_tnfrsf1b
13	Mac 7	L->R	Neu 2	HBEGF_CD44	hbegfa_cd44b
13	Mac 7	L->R	Neu 2	HBEGF_CD82	hbegfa_cd82a
13	Mac 7	L->R	Neu 2	HBEGF_CD82	hbegfa_cd82b
13	Mac 7	L->R	Neu 2	HBEGF_CD44	hbegfb_cd44b
13	Mac 7	L->R	Neu 2	HBEGF_CD82	hbegfb_cd82a
13	Mac 7	L->R	Neu 2	HBEGF_CD82	hbegfb_cd82b
13	Mac 7	L->R	Neu 2	HMGB1_AGER	hmgb1a_si:ch211-79k12.1
13	Mac 7	L->R	Neu 2	HMGB1_CXCR4	hmgb1a_cxcr4b
13	Mac 7	L->R	Neu 2	HRAS_INSR	hrasa_insra
13	Mac 7	L->R	Neu 2	ICAM3_ITGB2	si:ch211-66e2.3_itgb2
13	Mac 7	L->R	Neu 2	ICAM3_ITGB2	icam3_itgb2
13	Mac 7	L->R	Neu 2	IGF2_IGF2R	igf2b_igf2r
13	Mac 7	L->R	Neu 2	IGF2_INSR	igf2b_insra
13	Mac 7	L->R	Neu 2	IL16_CD4	il16_dicp1.3-4
13	Mac 7	L->R	Neu 2	IL16_CD4	il16_dicp3.3
13	Mac 7	L->R	Neu 2	IL16_CD4	il16_dicp3.1
13	Mac 7	L->R	Neu 2	IL1B_IL1R1	il1b_CABZ01054965.1
13	Mac 7	L->R	Neu 2	IL1B_IL1R1	il1b_zmp:0000000936
13	Mac 7	L->R	Neu 2	LAMB1_ITGAV	lamb1b_itgav
13	Mac 7	L->R	Neu 2	LAMB1_ITGB1	lamb1b_itgb1b
13	Mac 7	L->R	Neu 2	LRPAP1_SORT1	lrpap1_sort1b
13	Mac 7	L->R	Neu 2	MFGE8_ITGAV	mfge8a_itgav
13	Mac 7	L->R	Neu 2	MFNG_NOTCH2	mfng_notch2
13	Mac 7	L->R	Neu 2	MIF_CD44	mif_cd44b
13	Mac 7	L->R	Neu 2	MIF_CD74	mif_cd74a
13	Mac 7	L->R	Neu 2	MIF_CD74	mif_cd74b
13	Mac 7	L->R	Neu 2	MIF_CXCR4	mif_cxcr4b
13	Mac 7	L->R	Neu 2	MMP9_CD44	mmp9_cd44b
13	Mac 7	L->R	Neu 2	MMP9_ITGB2	mmp9_itgb2
13	Mac 7	L->R	Neu 2	NUCB2_ERAP1	nucb2a_erap1b
13	Mac 7	L->R	Neu 2	PDGFB_ITGAV	pdgfba_itgav
13	Mac 7	L->R	Neu 2	PKM_CD44	pkma_cd44b
13	Mac 7	L->R	Neu 2	PSAP_SORT1	psap_sort1b
13	Mac 7	L->R	Neu 2	RPS19_C5AR1	rps19_CABZ01041494.1
13	Mac 7	L->R	Neu 2	SERPINE1_ITGAV	serpine1_itgav
13	Mac 7	L->R	Neu 2	TIMP2_CD44	timp2b_cd44b
13	Mac 7	L->R	Neu 2	TIMP2_ITGB1	timp2b_itgb1b
14	MN	L->R	Neu 1	ADAM10_CD44	adam10a_cd44b
14	MN	L->R	Neu 1	ADAM10_IL6R	adam10a_il6r
14	MN	L->R	Neu 1	ADAM10_NOTCH2	adam10a_notch2
14	MN	L->R	Neu 1	ADAM10_TSPAN14	adam10a_tspan14
14	MN	L->R	Neu 1	ADAM17_IL6R	adam17a_il6r
14	MN	L->R	Neu 1	ADAM17_ITGB1	adam17a_CABZ01058721.1
14	MN	L->R	Neu 1	ADAM17_ITGB1	adam17a_itgb1b
14	MN	L->R	Neu 1	ADAM28_ITGA4	adam28_itga4
14	MN	L->R	Neu 1	ADAM9_ITGAV	adam9_itgav
14	MN	L->R	Neu 1	ADAM9_ITGB1	adam9_CABZ01058721.1
14	MN	L->R	Neu 1	ADAM9_ITGB1	adam9_itgb1b
14	MN	L->R	Neu 1	ADM_GPR84	adma_gpr84
14	MN	L->R	Neu 1	AGTRAP_RACK1	agtrap_rack1
14	MN	L->R	Neu 1	ALOX5AP_ALOX5	alox5ap_alox5a
14	MN	L->R	Neu 1	APOE_ABCA1	apoeb_abca1a
14	MN	L->R	Neu 1	APOE_ABCA1	apoeb_abca1b
14	MN	L->R	Neu 1	APP_AGER	appa_si:ch211-79k12.1
14	MN	L->R	Neu 1	APP_APLP2	appa_aplp2
14	MN	L->R	Neu 1	APP_CD74	appa_cd74a
14	MN	L->R	Neu 1	APP_CD74	appa_cd74b
14	MN	L->R	Neu 1	APP_LRP10	appa_lrp10
14	MN	L->R	Neu 1	APP_NOTCH2	appa_notch2
14	MN	L->R	Neu 1	APP_RPSA	appa_rpsa
14	MN	L->R	Neu 1	ARF6_SMAP1	arf6a_smap1
14	MN	L->R	Neu 1	ARF6_SMAP1	arf6b_smap1
14	MN	L->R	Neu 1	BSG_SELE	bsg_selp
14	MN	L->R	Neu 1	CALM2_ABCA1	calm3a_abca1a
14	MN	L->R	Neu 1	CALM2_ABCA1	calm3a_abca1b
14	MN	L->R	Neu 1	CALM2_INSR	calm3a_insra
14	MN	L->R	Neu 1	CALM2_KCNQ5	calm3a_kcnq5b
14	MN	L->R	Neu 1	CALM2_ABCA1	calm2a_abca1a
14	MN	L->R	Neu 1	CALM2_ABCA1	calm2a_abca1b
14	MN	L->R	Neu 1	CALM2_INSR	calm2a_insra
14	MN	L->R	Neu 1	CALM2_KCNQ5	calm2a_kcnq5b
14	MN	L->R	Neu 1	CALR_ITGAV	calr_itgav
14	MN	L->R	Neu 1	CD99_CD81	cd99_cd81a
14	MN	L->R	Neu 1	CNTF_IL6R	m17_il6r
14	MN	L->R	Neu 1	CSF3_CSF3R	csf3a_csf3r
14	MN	L->R	Neu 1	CSF3_CSF3R	csf3b_csf3r
14	MN	L->R	Neu 1	F13A1_ITGA4	f13a1b_itga4
14	MN	L->R	Neu 1	F13A1_ITGB1	f13a1b_CABZ01058721.1
14	MN	L->R	Neu 1	F13A1_ITGB1	f13a1b_itgb1b
14	MN	L->R	Neu 1	GNAI2_ADCY7	gnai2b_adcy7
14	MN	L->R	Neu 1	GNAI2_C5AR1	gnai2b_CABZ01041494.1
14	MN	L->R	Neu 1	GNAI2_S1PR4	gnai2b_s1pr4
14	MN	L->R	Neu 1	GNAI2_ADCY7	gnai2a_adcy7
14	MN	L->R	Neu 1	GNAI2_C5AR1	gnai2a_CABZ01041494.1
14	MN	L->R	Neu 1	GNAI2_S1PR4	gnai2a_s1pr4
14	MN	L->R	Neu 1	GNAS_ADCY7	gnas_adcy7
14	MN	L->R	Neu 1	GNAS_CRHR1	gnas_crhr1
14	MN	L->R	Neu 1	GPI_AMFR	gpia_amfra
14	MN	L->R	Neu 1	GRN_SORT1	grn1_sort1b
14	MN	L->R	Neu 1	GRN_TNFRSF1A	grn1_fas
14	MN	L->R	Neu 1	GRN_TNFRSF1B	grn1_tnfrsf1b
14	MN	L->R	Neu 1	GRN_SORT1	grn2_sort1b
14	MN	L->R	Neu 1	GRN_TNFRSF1A	grn2_fas
14	MN	L->R	Neu 1	GRN_TNFRSF1B	grn2_tnfrsf1b
14	MN	L->R	Neu 1	HBEGF_CD44	hbegfa_cd44b
14	MN	L->R	Neu 1	HBEGF_CD82	hbegfa_cd82b
14	MN	L->R	Neu 1	HBEGF_CD44	hbegfb_cd44b
14	MN	L->R	Neu 1	HBEGF_CD82	hbegfb_cd82b
14	MN	L->R	Neu 1	HMGB1_AGER	hmgb1a_si:ch211-79k12.1
14	MN	L->R	Neu 1	HMGB1_CXCR4	hmgb1a_cxcr4a
14	MN	L->R	Neu 1	HMGB1_CXCR4	hmgb1a_cxcr4b
14	MN	L->R	Neu 1	ICAM3_ITGB2	si:ch211-66e2.3_itgb2
14	MN	L->R	Neu 1	ICAM3_ITGB2	si:ch73-208g10.1_itgb2
14	MN	L->R	Neu 1	ICAM3_ITGB2	icam3_itgb2
14	MN	L->R	Neu 1	IGF2_IGF2R	igf2b_igf2r
14	MN	L->R	Neu 1	IGF2_INSR	igf2b_insra
14	MN	L->R	Neu 1	IL16_CD4	il16_dicp1.3-4
14	MN	L->R	Neu 1	IL16_CD4	il16_dicp3.3
14	MN	L->R	Neu 1	IL16_CD4	il16_dicp3.1
14	MN	L->R	Neu 1	IL1B_IL1R1	il1b_zmp:0000000936
14	MN	L->R	Neu 1	INHBA_ACVR2A	inhbaa_acvr2aa
14	MN	L->R	Neu 1	INHBA_SMAD3	inhbaa_smad3a
14	MN	L->R	Neu 1	LRPAP1_SORT1	lrpap1_sort1b
14	MN	L->R	Neu 1	MFGE8_ITGAV	mfge8b_itgav
14	MN	L->R	Neu 1	MFNG_NOTCH2	mfng_notch2
14	MN	L->R	Neu 1	MIF_CD44	mif_cd44b
14	MN	L->R	Neu 1	MIF_CD74	mif_cd74a
14	MN	L->R	Neu 1	MIF_CD74	mif_cd74b
14	MN	L->R	Neu 1	MIF_CXCR4	mif_cxcr4a
14	MN	L->R	Neu 1	MIF_CXCR4	mif_cxcr4b
14	MN	L->R	Neu 1	MMP9_CD44	mmp9_cd44b
14	MN	L->R	Neu 1	MMP9_ITGB2	mmp9_itgb2
14	MN	L->R	Neu 1	NAMPT_INSR	nampta_insra
14	MN	L->R	Neu 1	NUCB2_ERAP1	nucb2a_erap1b
14	MN	L->R	Neu 1	PDGFB_ITGAV	pdgfba_itgav
14	MN	L->R	Neu 1	PKM_CD44	pkma_cd44b
14	MN	L->R	Neu 1	PSAP_SORT1	psap_sort1b
14	MN	L->R	Neu 1	RPS19_C5AR1	rps19_CABZ01041494.1
14	MN	L->R	Neu 1	SERPINE1_ITGAV	serpine1_itgav
14	MN	L->R	Neu 1	TIMP2_CD44	timp2b_cd44b
14	MN	L->R	Neu 1	TIMP2_ITGB1	timp2b_CABZ01058721.1
14	MN	L->R	Neu 1	TIMP2_ITGB1	timp2b_itgb1b
14	MN	L->R	Neu 1	TNF_TNFRSF1A	tnfa_fas
14	MN	L->R	Neu 1	TNF_TNFRSF1B	tnfa_tnfrsf1b
14	MN	L->R	Neu 1	TNF_TRADD	tnfa_tradd
14	MN	L->R	Neu 1	TNF_TNFRSF1A	tnfb_fas
14	MN	L->R	Neu 1	TNF_TNFRSF1B	tnfb_tnfrsf1b
14	MN	L->R	Neu 1	TNF_TRADD	tnfb_tradd
14	MN	L->R	Neu 1	TNFSF13B_TFRC	tnfsf13b_tfr1b
14	MN	L->R	Neu 1	UBA52_TGFBR1	uba52_tgfbr1b
15	MN	L->R	Neu 2	ADAM10_CD44	adam10a_cd44b
15	MN	L->R	Neu 2	ADAM10_IL6R	adam10a_il6r
15	MN	L->R	Neu 2	ADAM10_NOTCH2	adam10a_notch2
15	MN	L->R	Neu 2	ADAM10_TSPAN14	adam10a_tspan14
15	MN	L->R	Neu 2	ADAM17_IL6R	adam17a_il6r
15	MN	L->R	Neu 2	ADAM17_ITGB1	adam17a_itgb1b
15	MN	L->R	Neu 2	ADAM28_ITGA4	adam28_itga4
15	MN	L->R	Neu 2	ADAM9_ITGAV	adam9_itgav
15	MN	L->R	Neu 2	ADAM9_ITGB1	adam9_itgb1b
15	MN	L->R	Neu 2	ADM_GPR84	adma_gpr84
15	MN	L->R	Neu 2	AGTRAP_RACK1	agtrap_rack1
15	MN	L->R	Neu 2	ALOX5AP_ALOX5	alox5ap_alox5a
15	MN	L->R	Neu 2	APOE_ABCA1	apoeb_abca1a
15	MN	L->R	Neu 2	APOE_ABCA1	apoeb_abca1b
15	MN	L->R	Neu 2	APP_AGER	appa_si:ch211-79k12.1
15	MN	L->R	Neu 2	APP_APLP2	appa_aplp2
15	MN	L->R	Neu 2	APP_CD74	appa_cd74a
15	MN	L->R	Neu 2	APP_CD74	appa_cd74b
15	MN	L->R	Neu 2	APP_LRP10	appa_lrp10
15	MN	L->R	Neu 2	APP_NOTCH2	appa_notch2
15	MN	L->R	Neu 2	APP_RPSA	appa_rpsa
15	MN	L->R	Neu 2	ARF6_SMAP1	arf6a_smap1
15	MN	L->R	Neu 2	ARF6_SMAP1	arf6b_smap1
15	MN	L->R	Neu 2	BSG_SELE	bsg_selp
15	MN	L->R	Neu 2	CALM2_ABCA1	calm3a_abca1a
15	MN	L->R	Neu 2	CALM2_ABCA1	calm3a_abca1b
15	MN	L->R	Neu 2	CALM2_INSR	calm3a_insra
15	MN	L->R	Neu 2	CALM2_KCNQ5	calm3a_kcnq5b
15	MN	L->R	Neu 2	CALM2_ABCA1	calm2a_abca1a
15	MN	L->R	Neu 2	CALM2_ABCA1	calm2a_abca1b
15	MN	L->R	Neu 2	CALM2_INSR	calm2a_insra
15	MN	L->R	Neu 2	CALM2_KCNQ5	calm2a_kcnq5b
15	MN	L->R	Neu 2	CALR_ITGAV	calr_itgav
15	MN	L->R	Neu 2	CD99_CD81	cd99_cd81a
15	MN	L->R	Neu 2	CNTF_IL6R	m17_il6r
15	MN	L->R	Neu 2	CSF3_CSF3R	csf3a_csf3r
15	MN	L->R	Neu 2	CSF3_CSF3R	csf3b_csf3r
15	MN	L->R	Neu 2	CXCL9_CXCR3	cxcl11.6_cxcr3.3
15	MN	L->R	Neu 2	CXCL9_CXCR3	cxcl11.5_cxcr3.3
15	MN	L->R	Neu 2	CXCL9_CXCR3	BX323596.1_cxcr3.3
15	MN	L->R	Neu 2	CXCL9_CXCR3	BX323596.2_cxcr3.3
15	MN	L->R	Neu 2	F13A1_ITGA4	f13a1b_itga4
15	MN	L->R	Neu 2	F13A1_ITGB1	f13a1b_itgb1b
15	MN	L->R	Neu 2	GNAI2_ADCY7	gnai2b_adcy7
15	MN	L->R	Neu 2	GNAI2_C5AR1	gnai2b_CABZ01041494.1
15	MN	L->R	Neu 2	GNAI2_CXCR3	gnai2b_cxcr3.3
15	MN	L->R	Neu 2	GNAI2_S1PR4	gnai2b_s1pr4
15	MN	L->R	Neu 2	GNAI2_ADCY7	gnai2a_adcy7
15	MN	L->R	Neu 2	GNAI2_C5AR1	gnai2a_CABZ01041494.1
15	MN	L->R	Neu 2	GNAI2_CXCR3	gnai2a_cxcr3.3
15	MN	L->R	Neu 2	GNAI2_S1PR4	gnai2a_s1pr4
15	MN	L->R	Neu 2	GNAS_ADCY7	gnas_adcy7
15	MN	L->R	Neu 2	GNAS_CRHR1	gnas_crhr1
15	MN	L->R	Neu 2	GPI_AMFR	gpia_amfra
15	MN	L->R	Neu 2	GRN_SORT1	grn1_sort1b
15	MN	L->R	Neu 2	GRN_TNFRSF1A	grn1_fas
15	MN	L->R	Neu 2	GRN_TNFRSF1B	grn1_tnfrsf1b
15	MN	L->R	Neu 2	GRN_SORT1	grn2_sort1b
15	MN	L->R	Neu 2	GRN_TNFRSF1A	grn2_fas
15	MN	L->R	Neu 2	GRN_TNFRSF1B	grn2_tnfrsf1b
15	MN	L->R	Neu 2	HBEGF_CD44	hbegfa_cd44b
15	MN	L->R	Neu 2	HBEGF_CD82	hbegfa_cd82a
15	MN	L->R	Neu 2	HBEGF_CD82	hbegfa_cd82b
15	MN	L->R	Neu 2	HBEGF_CD44	hbegfb_cd44b
15	MN	L->R	Neu 2	HBEGF_CD82	hbegfb_cd82a
15	MN	L->R	Neu 2	HBEGF_CD82	hbegfb_cd82b
15	MN	L->R	Neu 2	HMGB1_AGER	hmgb1a_si:ch211-79k12.1
15	MN	L->R	Neu 2	HMGB1_CXCR4	hmgb1a_cxcr4b
15	MN	L->R	Neu 2	ICAM3_ITGB2	si:ch211-66e2.3_itgb2
15	MN	L->R	Neu 2	ICAM3_ITGB2	si:ch73-208g10.1_itgb2
15	MN	L->R	Neu 2	ICAM3_ITGB2	icam3_itgb2
15	MN	L->R	Neu 2	IGF2_IGF2R	igf2b_igf2r
15	MN	L->R	Neu 2	IGF2_INSR	igf2b_insra
15	MN	L->R	Neu 2	IL16_CD4	il16_dicp1.3-4
15	MN	L->R	Neu 2	IL16_CD4	il16_dicp3.3
15	MN	L->R	Neu 2	IL16_CD4	il16_dicp3.1
15	MN	L->R	Neu 2	IL1B_IL1R1	il1b_CABZ01054965.1
15	MN	L->R	Neu 2	IL1B_IL1R1	il1b_zmp:0000000936
15	MN	L->R	Neu 2	INHBA_ACVR2A	inhbaa_acvr2aa
15	MN	L->R	Neu 2	INHBA_SMAD3	inhbaa_smad3a
15	MN	L->R	Neu 2	LRPAP1_SORT1	lrpap1_sort1b
15	MN	L->R	Neu 2	MFGE8_ITGAV	mfge8b_itgav
15	MN	L->R	Neu 2	MFNG_NOTCH2	mfng_notch2
15	MN	L->R	Neu 2	MIF_CD44	mif_cd44b
15	MN	L->R	Neu 2	MIF_CD74	mif_cd74a
15	MN	L->R	Neu 2	MIF_CD74	mif_cd74b
15	MN	L->R	Neu 2	MIF_CXCR4	mif_cxcr4b
15	MN	L->R	Neu 2	MMP9_CD44	mmp9_cd44b
15	MN	L->R	Neu 2	MMP9_ITGB2	mmp9_itgb2
15	MN	L->R	Neu 2	NAMPT_INSR	nampta_insra
15	MN	L->R	Neu 2	NUCB2_ERAP1	nucb2a_erap1b
15	MN	L->R	Neu 2	PDGFB_ITGAV	pdgfba_itgav
15	MN	L->R	Neu 2	PKM_CD44	pkma_cd44b
15	MN	L->R	Neu 2	PSAP_SORT1	psap_sort1b
15	MN	L->R	Neu 2	RPS19_C5AR1	rps19_CABZ01041494.1
15	MN	L->R	Neu 2	SERPINE1_ITGAV	serpine1_itgav
15	MN	L->R	Neu 2	TIMP2_CD44	timp2b_cd44b
15	MN	L->R	Neu 2	TIMP2_ITGB1	timp2b_itgb1b
15	MN	L->R	Neu 2	TNF_TNFRSF1A	tnfa_fas
15	MN	L->R	Neu 2	TNF_TNFRSF1B	tnfa_tnfrsf1b
15	MN	L->R	Neu 2	TNF_TRADD	tnfa_tradd
15	MN	L->R	Neu 2	TNF_TNFRSF1A	tnfb_fas
15	MN	L->R	Neu 2	TNF_TNFRSF1B	tnfb_tnfrsf1b
15	MN	L->R	Neu 2	TNF_TRADD	tnfb_tradd
15	MN	L->R	Neu 2	TNFSF13B_TFRC	tnfsf13b_tfr1b
16	Mac 8	L->R	Neu 1	ADAM10_CD44	adam10a_cd44b
16	Mac 8	L->R	Neu 1	ADAM10_IL6R	adam10a_il6r
16	Mac 8	L->R	Neu 1	ADAM10_NOTCH2	adam10a_notch2
16	Mac 8	L->R	Neu 1	ADAM10_TSPAN14	adam10a_tspan14
16	Mac 8	L->R	Neu 1	AGTRAP_RACK1	agtrap_rack1
16	Mac 8	L->R	Neu 1	ALOX5AP_ALOX5	alox5ap_alox5a
16	Mac 8	L->R	Neu 1	APOE_ABCA1	apoeb_abca1a
16	Mac 8	L->R	Neu 1	APOE_ABCA1	apoeb_abca1b
16	Mac 8	L->R	Neu 1	APP_AGER	appa_si:ch211-79k12.1
16	Mac 8	L->R	Neu 1	APP_APLP2	appa_aplp2
16	Mac 8	L->R	Neu 1	APP_CD74	appa_cd74a
16	Mac 8	L->R	Neu 1	APP_CD74	appa_cd74b
16	Mac 8	L->R	Neu 1	APP_LRP10	appa_lrp10
16	Mac 8	L->R	Neu 1	APP_NOTCH2	appa_notch2
16	Mac 8	L->R	Neu 1	APP_RPSA	appa_rpsa
16	Mac 8	L->R	Neu 1	ARF6_SMAP1	arf6a_smap1
16	Mac 8	L->R	Neu 1	ARF6_SMAP1	arf6b_smap1
16	Mac 8	L->R	Neu 1	BSG_SELE	bsg_selp
16	Mac 8	L->R	Neu 1	CALM2_ABCA1	calm3a_abca1a
16	Mac 8	L->R	Neu 1	CALM2_ABCA1	calm3a_abca1b
16	Mac 8	L->R	Neu 1	CALM2_INSR	calm3a_insra
16	Mac 8	L->R	Neu 1	CALM2_KCNQ5	calm3a_kcnq5b
16	Mac 8	L->R	Neu 1	CALM2_ABCA1	calm2a_abca1a
16	Mac 8	L->R	Neu 1	CALM2_ABCA1	calm2a_abca1b
16	Mac 8	L->R	Neu 1	CALM2_INSR	calm2a_insra
16	Mac 8	L->R	Neu 1	CALM2_KCNQ5	calm2a_kcnq5b
16	Mac 8	L->R	Neu 1	CCN1_ITGAV	ccn1_itgav
16	Mac 8	L->R	Neu 1	CCN1_ITGB2	ccn1_itgb2
16	Mac 8	L->R	Neu 1	CD99_CD81	cd99_cd81a
16	Mac 8	L->R	Neu 1	F13A1_ITGA4	f13a1b_itga4
16	Mac 8	L->R	Neu 1	F13A1_ITGB1	f13a1b_CABZ01058721.1
16	Mac 8	L->R	Neu 1	F13A1_ITGB1	f13a1b_itgb1b
16	Mac 8	L->R	Neu 1	FN1_C5AR1	fn1b_CABZ01041494.1
16	Mac 8	L->R	Neu 1	FN1_CD44	fn1b_cd44b
16	Mac 8	L->R	Neu 1	FN1_ITGA4	fn1b_itga4
16	Mac 8	L->R	Neu 1	FN1_ITGAV	fn1b_itgav
16	Mac 8	L->R	Neu 1	FN1_ITGB1	fn1b_CABZ01058721.1
16	Mac 8	L->R	Neu 1	FN1_ITGB1	fn1b_itgb1b
16	Mac 8	L->R	Neu 1	FN1_C5AR1	fn1a_CABZ01041494.1
16	Mac 8	L->R	Neu 1	FN1_CD44	fn1a_cd44b
16	Mac 8	L->R	Neu 1	FN1_ITGA4	fn1a_itga4
16	Mac 8	L->R	Neu 1	FN1_ITGAV	fn1a_itgav
16	Mac 8	L->R	Neu 1	FN1_ITGB1	fn1a_CABZ01058721.1
16	Mac 8	L->R	Neu 1	FN1_ITGB1	fn1a_itgb1b
16	Mac 8	L->R	Neu 1	GNAI2_ADCY7	gnai2a_adcy7
16	Mac 8	L->R	Neu 1	GNAI2_C5AR1	gnai2a_CABZ01041494.1
16	Mac 8	L->R	Neu 1	GNAI2_S1PR4	gnai2a_s1pr4
16	Mac 8	L->R	Neu 1	GPI_AMFR	gpib_amfra
16	Mac 8	L->R	Neu 1	GPI_AMFR	gpia_amfra
16	Mac 8	L->R	Neu 1	GRN_SORT1	grn1_sort1b
16	Mac 8	L->R	Neu 1	GRN_TNFRSF1A	grn1_fas
16	Mac 8	L->R	Neu 1	GRN_TNFRSF1B	grn1_tnfrsf1b
16	Mac 8	L->R	Neu 1	GRN_SORT1	grn2_sort1b
16	Mac 8	L->R	Neu 1	GRN_TNFRSF1A	grn2_fas
16	Mac 8	L->R	Neu 1	GRN_TNFRSF1B	grn2_tnfrsf1b
16	Mac 8	L->R	Neu 1	HBEGF_CD44	hbegfa_cd44b
16	Mac 8	L->R	Neu 1	HBEGF_CD82	hbegfa_cd82b
16	Mac 8	L->R	Neu 1	HMGB1_AGER	hmgb1b_si:ch211-79k12.1
16	Mac 8	L->R	Neu 1	HMGB1_CXCR4	hmgb1b_cxcr4a
16	Mac 8	L->R	Neu 1	HMGB1_CXCR4	hmgb1b_cxcr4b
16	Mac 8	L->R	Neu 1	HMGB1_AGER	hmgb1a_si:ch211-79k12.1
16	Mac 8	L->R	Neu 1	HMGB1_CXCR4	hmgb1a_cxcr4a
16	Mac 8	L->R	Neu 1	HMGB1_CXCR4	hmgb1a_cxcr4b
16	Mac 8	L->R	Neu 1	ICAM3_ITGB2	si:ch211-66e2.3_itgb2
16	Mac 8	L->R	Neu 1	ICAM3_ITGB2	icam3_itgb2
16	Mac 8	L->R	Neu 1	IGF2_IGF2R	igf2b_igf2r
16	Mac 8	L->R	Neu 1	IGF2_INSR	igf2b_insra
16	Mac 8	L->R	Neu 1	IL1B_IL1R1	il1b_zmp:0000000936
16	Mac 8	L->R	Neu 1	JAM3_ITGB1	jam3b_CABZ01058721.1
16	Mac 8	L->R	Neu 1	JAM3_ITGB1	jam3b_itgb1b
16	Mac 8	L->R	Neu 1	JAM3_ITGB2	jam3b_itgb2
16	Mac 8	L->R	Neu 1	LRPAP1_SORT1	lrpap1_sort1b
16	Mac 8	L->R	Neu 1	MDK_ITGA4	mdka_itga4
16	Mac 8	L->R	Neu 1	MDK_ITGB1	mdka_CABZ01058721.1
16	Mac 8	L->R	Neu 1	MDK_ITGB1	mdka_itgb1b
16	Mac 8	L->R	Neu 1	MDK_SDC4	mdka_sdc4
16	Mac 8	L->R	Neu 1	MFNG_NOTCH2	mfng_notch2
16	Mac 8	L->R	Neu 1	MIF_CD44	mif_cd44b
16	Mac 8	L->R	Neu 1	MIF_CD74	mif_cd74a
16	Mac 8	L->R	Neu 1	MIF_CD74	mif_cd74b
16	Mac 8	L->R	Neu 1	MIF_CXCR4	mif_cxcr4a
16	Mac 8	L->R	Neu 1	MIF_CXCR4	mif_cxcr4b
16	Mac 8	L->R	Neu 1	MMP9_CD44	mmp9_cd44b
16	Mac 8	L->R	Neu 1	MMP9_ITGB2	mmp9_itgb2
16	Mac 8	L->R	Neu 1	NAMPT_INSR	nampta_insra
16	Mac 8	L->R	Neu 1	NUCB2_ERAP1	nucb2a_erap1b
16	Mac 8	L->R	Neu 1	PDGFB_ITGAV	pdgfba_itgav
16	Mac 8	L->R	Neu 1	PKM_CD44	pkma_cd44b
16	Mac 8	L->R	Neu 1	PKM_CD44	pkmb_cd44b
16	Mac 8	L->R	Neu 1	PSAP_SORT1	psap_sort1b
16	Mac 8	L->R	Neu 1	RPS19_C5AR1	rps19_CABZ01041494.1
16	Mac 8	L->R	Neu 1	SERPINE1_ITGAV	serpine1_itgav
16	Mac 8	L->R	Neu 1	SORBS1_INSR	sorbs1_insra
16	Mac 8	L->R	Neu 1	TIMP2_CD44	timp2b_cd44b
16	Mac 8	L->R	Neu 1	TIMP2_ITGB1	timp2b_CABZ01058721.1
16	Mac 8	L->R	Neu 1	TIMP2_ITGB1	timp2b_itgb1b
16	Mac 8	L->R	Neu 1	TNF_TNFRSF1A	tnfb_fas
16	Mac 8	L->R	Neu 1	TNF_TNFRSF1B	tnfb_tnfrsf1b
16	Mac 8	L->R	Neu 1	TNF_TRADD	tnfb_tradd
16	Mac 8	L->R	Neu 1	TNFSF13B_TFRC	tnfsf13b_tfr1b
16	Mac 8	L->R	Neu 1	UBA52_TGFBR1	uba52_tgfbr1b
17	Mac 8	L->R	Neu 2	ADAM10_CD44	adam10a_cd44b
17	Mac 8	L->R	Neu 2	ADAM10_IL6R	adam10a_il6r
17	Mac 8	L->R	Neu 2	ADAM10_NOTCH2	adam10a_notch2
17	Mac 8	L->R	Neu 2	ADAM10_TSPAN14	adam10a_tspan14
17	Mac 8	L->R	Neu 2	AGTRAP_RACK1	agtrap_rack1
17	Mac 8	L->R	Neu 2	ALOX5AP_ALOX5	alox5ap_alox5a
17	Mac 8	L->R	Neu 2	APOE_ABCA1	apoeb_abca1a
17	Mac 8	L->R	Neu 2	APOE_ABCA1	apoeb_abca1b
17	Mac 8	L->R	Neu 2	APP_AGER	appa_si:ch211-79k12.1
17	Mac 8	L->R	Neu 2	APP_APLP2	appa_aplp2
17	Mac 8	L->R	Neu 2	APP_CD74	appa_cd74a
17	Mac 8	L->R	Neu 2	APP_CD74	appa_cd74b
17	Mac 8	L->R	Neu 2	APP_LRP10	appa_lrp10
17	Mac 8	L->R	Neu 2	APP_NOTCH2	appa_notch2
17	Mac 8	L->R	Neu 2	APP_RPSA	appa_rpsa
17	Mac 8	L->R	Neu 2	ARF6_SMAP1	arf6a_smap1
17	Mac 8	L->R	Neu 2	ARF6_SMAP1	arf6b_smap1
17	Mac 8	L->R	Neu 2	BSG_SELE	bsg_selp
17	Mac 8	L->R	Neu 2	CALM2_ABCA1	calm3a_abca1a
17	Mac 8	L->R	Neu 2	CALM2_ABCA1	calm3a_abca1b
17	Mac 8	L->R	Neu 2	CALM2_INSR	calm3a_insra
17	Mac 8	L->R	Neu 2	CALM2_KCNQ5	calm3a_kcnq5b
17	Mac 8	L->R	Neu 2	CALM2_ABCA1	calm2a_abca1a
17	Mac 8	L->R	Neu 2	CALM2_ABCA1	calm2a_abca1b
17	Mac 8	L->R	Neu 2	CALM2_INSR	calm2a_insra
17	Mac 8	L->R	Neu 2	CALM2_KCNQ5	calm2a_kcnq5b
17	Mac 8	L->R	Neu 2	CCN1_ITGAV	ccn1_itgav
17	Mac 8	L->R	Neu 2	CCN1_ITGB2	ccn1_itgb2
17	Mac 8	L->R	Neu 2	CD99_CD81	cd99_cd81a
17	Mac 8	L->R	Neu 2	F13A1_ITGA4	f13a1b_itga4
17	Mac 8	L->R	Neu 2	F13A1_ITGB1	f13a1b_itgb1b
17	Mac 8	L->R	Neu 2	FN1_C5AR1	fn1b_CABZ01041494.1
17	Mac 8	L->R	Neu 2	FN1_CD44	fn1b_cd44b
17	Mac 8	L->R	Neu 2	FN1_ITGA4	fn1b_itga4
17	Mac 8	L->R	Neu 2	FN1_ITGAV	fn1b_itgav
17	Mac 8	L->R	Neu 2	FN1_ITGB1	fn1b_itgb1b
17	Mac 8	L->R	Neu 2	FN1_C5AR1	fn1a_CABZ01041494.1
17	Mac 8	L->R	Neu 2	FN1_CD44	fn1a_cd44b
17	Mac 8	L->R	Neu 2	FN1_ITGA4	fn1a_itga4
17	Mac 8	L->R	Neu 2	FN1_ITGAV	fn1a_itgav
17	Mac 8	L->R	Neu 2	FN1_ITGB1	fn1a_itgb1b
17	Mac 8	L->R	Neu 2	GNAI2_ADCY7	gnai2a_adcy7
17	Mac 8	L->R	Neu 2	GNAI2_C5AR1	gnai2a_CABZ01041494.1
17	Mac 8	L->R	Neu 2	GNAI2_CXCR3	gnai2a_cxcr3.3
17	Mac 8	L->R	Neu 2	GNAI2_S1PR4	gnai2a_s1pr4
17	Mac 8	L->R	Neu 2	GPI_AMFR	gpib_amfra
17	Mac 8	L->R	Neu 2	GPI_AMFR	gpia_amfra
17	Mac 8	L->R	Neu 2	GRN_SORT1	grn1_sort1b
17	Mac 8	L->R	Neu 2	GRN_TNFRSF1A	grn1_fas
17	Mac 8	L->R	Neu 2	GRN_TNFRSF1B	grn1_tnfrsf1b
17	Mac 8	L->R	Neu 2	GRN_SORT1	grn2_sort1b
17	Mac 8	L->R	Neu 2	GRN_TNFRSF1A	grn2_fas
17	Mac 8	L->R	Neu 2	GRN_TNFRSF1B	grn2_tnfrsf1b
17	Mac 8	L->R	Neu 2	HBEGF_CD44	hbegfa_cd44b
17	Mac 8	L->R	Neu 2	HBEGF_CD82	hbegfa_cd82a
17	Mac 8	L->R	Neu 2	HBEGF_CD82	hbegfa_cd82b
17	Mac 8	L->R	Neu 2	HMGB1_AGER	hmgb1b_si:ch211-79k12.1
17	Mac 8	L->R	Neu 2	HMGB1_CXCR4	hmgb1b_cxcr4b
17	Mac 8	L->R	Neu 2	HMGB1_AGER	hmgb1a_si:ch211-79k12.1
17	Mac 8	L->R	Neu 2	HMGB1_CXCR4	hmgb1a_cxcr4b
17	Mac 8	L->R	Neu 2	ICAM3_ITGB2	si:ch211-66e2.3_itgb2
17	Mac 8	L->R	Neu 2	ICAM3_ITGB2	icam3_itgb2
17	Mac 8	L->R	Neu 2	IGF2_IGF2R	igf2b_igf2r
17	Mac 8	L->R	Neu 2	IGF2_INSR	igf2b_insra
17	Mac 8	L->R	Neu 2	IL1B_IL1R1	il1b_CABZ01054965.1
17	Mac 8	L->R	Neu 2	IL1B_IL1R1	il1b_zmp:0000000936
17	Mac 8	L->R	Neu 2	JAM3_ITGB1	jam3b_itgb1b
17	Mac 8	L->R	Neu 2	JAM3_ITGB2	jam3b_itgb2
17	Mac 8	L->R	Neu 2	LRPAP1_SORT1	lrpap1_sort1b
17	Mac 8	L->R	Neu 2	MDK_ITGA4	mdka_itga4
17	Mac 8	L->R	Neu 2	MDK_ITGB1	mdka_itgb1b
17	Mac 8	L->R	Neu 2	MDK_SDC4	mdka_sdc4
17	Mac 8	L->R	Neu 2	MFNG_NOTCH2	mfng_notch2
17	Mac 8	L->R	Neu 2	MIF_CD44	mif_cd44b
17	Mac 8	L->R	Neu 2	MIF_CD74	mif_cd74a
17	Mac 8	L->R	Neu 2	MIF_CD74	mif_cd74b
17	Mac 8	L->R	Neu 2	MIF_CXCR4	mif_cxcr4b
17	Mac 8	L->R	Neu 2	MMP9_CD44	mmp9_cd44b
17	Mac 8	L->R	Neu 2	MMP9_ITGB2	mmp9_itgb2
17	Mac 8	L->R	Neu 2	NAMPT_INSR	nampta_insra
17	Mac 8	L->R	Neu 2	NUCB2_ERAP1	nucb2a_erap1b
17	Mac 8	L->R	Neu 2	PDGFB_ITGAV	pdgfba_itgav
17	Mac 8	L->R	Neu 2	PKM_CD44	pkma_cd44b
17	Mac 8	L->R	Neu 2	PKM_CD44	pkmb_cd44b
17	Mac 8	L->R	Neu 2	PSAP_SORT1	psap_sort1b
17	Mac 8	L->R	Neu 2	RPS19_C5AR1	rps19_CABZ01041494.1
17	Mac 8	L->R	Neu 2	SERPINE1_ITGAV	serpine1_itgav
17	Mac 8	L->R	Neu 2	SORBS1_INSR	sorbs1_insra
17	Mac 8	L->R	Neu 2	TIMP2_CD44	timp2b_cd44b
17	Mac 8	L->R	Neu 2	TIMP2_ITGB1	timp2b_itgb1b
17	Mac 8	L->R	Neu 2	TNF_TNFRSF1A	tnfb_fas
17	Mac 8	L->R	Neu 2	TNF_TNFRSF1B	tnfb_tnfrsf1b
17	Mac 8	L->R	Neu 2	TNF_TRADD	tnfb_tradd
17	Mac 8	L->R	Neu 2	TNFSF13B_TFRC	tnfsf13b_tfr1b
18	Mac 9	L->R	Neu 1	ADAM10_CD44	adam10a_cd44b
18	Mac 9	L->R	Neu 1	ADAM10_IL6R	adam10a_il6r
18	Mac 9	L->R	Neu 1	ADAM10_NOTCH2	adam10a_notch2
18	Mac 9	L->R	Neu 1	ADAM10_TSPAN14	adam10a_tspan14
18	Mac 9	L->R	Neu 1	ADAM17_IL6R	adam17a_il6r
18	Mac 9	L->R	Neu 1	ADAM17_ITGB1	adam17a_CABZ01058721.1
18	Mac 9	L->R	Neu 1	ADAM17_ITGB1	adam17a_itgb1b
18	Mac 9	L->R	Neu 1	ADAM9_ITGAV	adam9_itgav
18	Mac 9	L->R	Neu 1	ADAM9_ITGB1	adam9_CABZ01058721.1
18	Mac 9	L->R	Neu 1	ADAM9_ITGB1	adam9_itgb1b
18	Mac 9	L->R	Neu 1	ADM_GPR84	adma_gpr84
18	Mac 9	L->R	Neu 1	APOE_ABCA1	apoeb_abca1a
18	Mac 9	L->R	Neu 1	APOE_ABCA1	apoeb_abca1b
18	Mac 9	L->R	Neu 1	APP_AGER	appa_si:ch211-79k12.1
18	Mac 9	L->R	Neu 1	APP_APLP2	appa_aplp2
18	Mac 9	L->R	Neu 1	APP_CD74	appa_cd74a
18	Mac 9	L->R	Neu 1	APP_CD74	appa_cd74b
18	Mac 9	L->R	Neu 1	APP_LRP10	appa_lrp10
18	Mac 9	L->R	Neu 1	APP_NOTCH2	appa_notch2
18	Mac 9	L->R	Neu 1	APP_RPSA	appa_rpsa
18	Mac 9	L->R	Neu 1	ARF6_SMAP1	arf6a_smap1
18	Mac 9	L->R	Neu 1	ARF6_SMAP1	arf6b_smap1
18	Mac 9	L->R	Neu 1	BSG_SELE	bsg_selp
18	Mac 9	L->R	Neu 1	CALM2_ABCA1	calm3a_abca1a
18	Mac 9	L->R	Neu 1	CALM2_ABCA1	calm3a_abca1b
18	Mac 9	L->R	Neu 1	CALM2_INSR	calm3a_insra
18	Mac 9	L->R	Neu 1	CALM2_KCNQ5	calm3a_kcnq5b
18	Mac 9	L->R	Neu 1	CALM2_ABCA1	calm2a_abca1a
18	Mac 9	L->R	Neu 1	CALM2_ABCA1	calm2a_abca1b
18	Mac 9	L->R	Neu 1	CALM2_INSR	calm2a_insra
18	Mac 9	L->R	Neu 1	CALM2_KCNQ5	calm2a_kcnq5b
18	Mac 9	L->R	Neu 1	CALR_ITGAV	calr_itgav
18	Mac 9	L->R	Neu 1	CD99_CD81	cd99_cd81a
18	Mac 9	L->R	Neu 1	GNAI2_ADCY7	gnai2b_adcy7
18	Mac 9	L->R	Neu 1	GNAI2_C5AR1	gnai2b_CABZ01041494.1
18	Mac 9	L->R	Neu 1	GNAI2_S1PR4	gnai2b_s1pr4
18	Mac 9	L->R	Neu 1	GNAI2_ADCY7	gnai2a_adcy7
18	Mac 9	L->R	Neu 1	GNAI2_C5AR1	gnai2a_CABZ01041494.1
18	Mac 9	L->R	Neu 1	GNAI2_S1PR4	gnai2a_s1pr4
18	Mac 9	L->R	Neu 1	GPI_AMFR	gpia_amfra
18	Mac 9	L->R	Neu 1	GRN_SORT1	grn1_sort1b
18	Mac 9	L->R	Neu 1	GRN_TNFRSF1A	grn1_fas
18	Mac 9	L->R	Neu 1	GRN_TNFRSF1B	grn1_tnfrsf1b
18	Mac 9	L->R	Neu 1	HBEGF_CD44	hbegfa_cd44b
18	Mac 9	L->R	Neu 1	HBEGF_CD82	hbegfa_cd82b
18	Mac 9	L->R	Neu 1	HMGB1_AGER	hmgb1b_si:ch211-79k12.1
18	Mac 9	L->R	Neu 1	HMGB1_CXCR4	hmgb1b_cxcr4a
18	Mac 9	L->R	Neu 1	HMGB1_CXCR4	hmgb1b_cxcr4b
18	Mac 9	L->R	Neu 1	HMGB1_AGER	hmgb1a_si:ch211-79k12.1
18	Mac 9	L->R	Neu 1	HMGB1_CXCR4	hmgb1a_cxcr4a
18	Mac 9	L->R	Neu 1	HMGB1_CXCR4	hmgb1a_cxcr4b
18	Mac 9	L->R	Neu 1	ICAM3_ITGB2	si:ch73-208g10.1_itgb2
18	Mac 9	L->R	Neu 1	ICAM3_ITGB2	icam3_itgb2
18	Mac 9	L->R	Neu 1	IL15_IL15RA	il15l_il15ra
18	Mac 9	L->R	Neu 1	IL15_IL2RB	il15l_csf2rb
18	Mac 9	L->R	Neu 1	IL15_IL2RB	il15l_il21r.1
18	Mac 9	L->R	Neu 1	IL16_CD4	il16_dicp1.3-4
18	Mac 9	L->R	Neu 1	IL16_CD4	il16_dicp3.3
18	Mac 9	L->R	Neu 1	IL16_CD4	il16_dicp3.1
18	Mac 9	L->R	Neu 1	JAG2_NOTCH2	jag2b_notch2
18	Mac 9	L->R	Neu 1	JAG2_NOTCH2	jag1b_notch2
18	Mac 9	L->R	Neu 1	LRPAP1_SORT1	lrpap1_sort1b
18	Mac 9	L->R	Neu 1	MFGE8_ITGAV	mfge8b_itgav
18	Mac 9	L->R	Neu 1	MFNG_NOTCH2	mfng_notch2
18	Mac 9	L->R	Neu 1	MIF_CD44	mif_cd44b
18	Mac 9	L->R	Neu 1	MIF_CD74	mif_cd74a
18	Mac 9	L->R	Neu 1	MIF_CD74	mif_cd74b
18	Mac 9	L->R	Neu 1	MIF_CXCR4	mif_cxcr4a
18	Mac 9	L->R	Neu 1	MIF_CXCR4	mif_cxcr4b
18	Mac 9	L->R	Neu 1	NUCB2_ERAP1	nucb2a_erap1b
18	Mac 9	L->R	Neu 1	NUCB2_ERAP1	nucb2b_erap1b
18	Mac 9	L->R	Neu 1	PKM_CD44	pkma_cd44b
18	Mac 9	L->R	Neu 1	PSAP_SORT1	psap_sort1b
18	Mac 9	L->R	Neu 1	RPS19_C5AR1	rps19_CABZ01041494.1
18	Mac 9	L->R	Neu 1	SERPINE1_ITGAV	serpine1_itgav
18	Mac 9	L->R	Neu 1	TIMP2_CD44	timp2b_cd44b
18	Mac 9	L->R	Neu 1	TIMP2_ITGB1	timp2b_CABZ01058721.1
18	Mac 9	L->R	Neu 1	TIMP2_ITGB1	timp2b_itgb1b
18	Mac 9	L->R	Neu 1	TNF_TNFRSF1A	tnfb_fas
18	Mac 9	L->R	Neu 1	TNF_TNFRSF1B	tnfb_tnfrsf1b
18	Mac 9	L->R	Neu 1	TNF_TRADD	tnfb_tradd
18	Mac 9	L->R	Neu 1	UBA52_TGFBR1	uba52_tgfbr1b
19	Mac 9	L->R	Neu 2	ADAM10_CD44	adam10a_cd44b
19	Mac 9	L->R	Neu 2	ADAM10_IL6R	adam10a_il6r
19	Mac 9	L->R	Neu 2	ADAM10_NOTCH2	adam10a_notch2
19	Mac 9	L->R	Neu 2	ADAM10_TSPAN14	adam10a_tspan14
19	Mac 9	L->R	Neu 2	ADAM17_IL6R	adam17a_il6r
19	Mac 9	L->R	Neu 2	ADAM17_ITGB1	adam17a_itgb1b
19	Mac 9	L->R	Neu 2	ADAM9_ITGAV	adam9_itgav
19	Mac 9	L->R	Neu 2	ADAM9_ITGB1	adam9_itgb1b
19	Mac 9	L->R	Neu 2	ADM_GPR84	adma_gpr84
19	Mac 9	L->R	Neu 2	APOE_ABCA1	apoeb_abca1a
19	Mac 9	L->R	Neu 2	APOE_ABCA1	apoeb_abca1b
19	Mac 9	L->R	Neu 2	APP_AGER	appa_si:ch211-79k12.1
19	Mac 9	L->R	Neu 2	APP_APLP2	appa_aplp2
19	Mac 9	L->R	Neu 2	APP_CD74	appa_cd74a
19	Mac 9	L->R	Neu 2	APP_CD74	appa_cd74b
19	Mac 9	L->R	Neu 2	APP_LRP10	appa_lrp10
19	Mac 9	L->R	Neu 2	APP_NOTCH2	appa_notch2
19	Mac 9	L->R	Neu 2	APP_RPSA	appa_rpsa
19	Mac 9	L->R	Neu 2	ARF6_SMAP1	arf6a_smap1
19	Mac 9	L->R	Neu 2	ARF6_SMAP1	arf6b_smap1
19	Mac 9	L->R	Neu 2	BSG_SELE	bsg_selp
19	Mac 9	L->R	Neu 2	CALM2_ABCA1	calm3a_abca1a
[truncated: 58 more rows]

## Sheet: links for cytoscape PBS3d
3dpci_Mac-ligand to Neu-receptor
Cluster pair ID	macrophage	pair type	neutrophil	no. pairs	edge width	condition
0	Mac 1	L->R	Neu 1	6	1.2	PBS3d
1	Mac 1	L->R	Neu 2	6	1.2	PBS3d
2	Mac 2	L->R	Neu 1	22	4.4	PBS3d
3	Mac 2	L->R	Neu 2	21	4.2	PBS3d
4	Mac 3	L->R	Neu 1	5	1	PBS3d
5	Mac 3	L->R	Neu 2	7	1.4	PBS3d
6	Mac 4	L->R	Neu 1	13	2.6	PBS3d
7	Mac 4	L->R	Neu 2	13	2.6	PBS3d
8	Mac 5	L->R	Neu 1	11	2.2	PBS3d
9	Mac 5	L->R	Neu 2	13	2.6	PBS3d
10	Mac 6	L->R	Neu 1	23	4.6	PBS3d
11	Mac 6	L->R	Neu 2	21	4.2	PBS3d
12	Mac 7	L->R	Neu 1	41	8.2	PBS3d
13	Mac 7	L->R	Neu 2	37	7.4	PBS3d
14	MN	L->R	Neu 1	17	3.4	PBS3d
15	MN	L->R	Neu 2	17	3.4	PBS3d
16	Mac 8	L->R	Neu 1	39	7.8	PBS3d
17	Mac 8	L->R	Neu 2	32	6.4	PBS3d
18	Mac 9	L->R	Neu 1	22	4.4	PBS3d
19	Mac 9	L->R	Neu 2	20	4	PBS3d

## Sheet: links for cytoscape CL3d
3dpci_Mac-ligand to Neu-receptor
Cluster pair ID	macrophage	pair type	neutrophil	no. pairs	edge width	condition
0	Mac 1	L->R	Neu 1	26	5.2	CL3d
1	Mac 1	L->R	Neu 2	32	6.4	CL3d
2	Mac 2	L->R	Neu 1	34	6.8	CL3d
3	Mac 2	L->R	Neu 2	45	9	CL3d
4	Mac 3	L->R	Neu 1	31	6.2	CL3d
5	Mac 3	L->R	Neu 2	36	7.2	CL3d
6	Mac 4	L->R	Neu 1	16	3.2	CL3d
7	Mac 4	L->R	Neu 2	21	4.2	CL3d
8	Mac 5	L->R	Neu 1	13	2.6	CL3d
9	Mac 5	L->R	Neu 2	18	3.6	CL3d
10	Mac 6	L->R	Neu 1	24	4.8	CL3d
11	Mac 6	L->R	Neu 2	28	5.6	CL3d
12	Mac 7	L->R	Neu 1	47	9.4	CL3d
13	Mac 7	L->R	Neu 2	51	10.2	CL3d
14	MN	L->R	Neu 1	23	4.6	CL3d
15	MN	L->R	Neu 2	22	4.4	CL3d
16	Mac 8	L->R	Neu 1	35	7	CL3d
17	Mac 8	L->R	Neu 2	46	9.2	CL3d
18	Mac 9	L->R	Neu 1	45	9	CL3d
19	Mac 9	L->R	Neu 2	47	9.4	CL3d

## Sheet: links PBS3d + CL3d
3dpci_Mac-ligand to Neu-receptor
Cluster pair ID	macrophage	pair type	neutrophil	no. pairs	edge width	condition
0	Mac 1	L->R	Neu 1	6	1.2	PBS3d
1	Mac 1	L->R	Neu 2	6	1.2	PBS3d
2	Mac 2	L->R	Neu 1	22	4.4	PBS3d
3	Mac 2	L->R	Neu 2	21	4.2	PBS3d
4	Mac 3	L->R	Neu 1	5	1	PBS3d
5	Mac 3	L->R	Neu 2	7	1.4	PBS3d
6	Mac 4	L->R	Neu 1	13	2.6	PBS3d
7	Mac 4	L->R	Neu 2	13	2.6	PBS3d
8	Mac 5	L->R	Neu 1	11	2.2	PBS3d
9	Mac 5	L->R	Neu 2	13	2.6	PBS3d
10	Mac 6	L->R	Neu 1	23	4.6	PBS3d
11	Mac 6	L->R	Neu 2	21	4.2	PBS3d
12	Mac 7	L->R	Neu 1	41	8.2	PBS3d
13	Mac 7	L->R	Neu 2	37	7.4	PBS3d
14	MN	L->R	Neu 1	17	3.4	PBS3d
15	MN	L->R	Neu 2	17	3.4	PBS3d
16	Mac 8	L->R	Neu 1	39	7.8	PBS3d
17	Mac 8	L->R	Neu 2	32	6.4	PBS3d
18	Mac 9	L->R	Neu 1	22	4.4	PBS3d
19	Mac 9	L->R	Neu 2	20	4	PBS3d
0	Mac 1	L->R	Neu 1	26	5.2	CL3d
1	Mac 1	L->R	Neu 2	32	6.4	CL3d
2	Mac 2	L->R	Neu 1	34	6.8	CL3d
3	Mac 2	L->R	Neu 2	45	9	CL3d
4	Mac 3	L->R	Neu 1	31	6.2	CL3d
5	Mac 3	L->R	Neu 2	36	7.2	CL3d
6	Mac 4	L->R	Neu 1	16	3.2	CL3d
7	Mac 4	L->R	Neu 2	21	4.2	CL3d
8	Mac 5	L->R	Neu 1	13	2.6	CL3d
9	Mac 5	L->R	Neu 2	18	3.6	CL3d
10	Mac 6	L->R	Neu 1	24	4.8	CL3d
11	Mac 6	L->R	Neu 2	28	5.6	CL3d
12	Mac 7	L->R	Neu 1	47	9.4	CL3d
13	Mac 7	L->R	Neu 2	51	10.2	CL3d
14	MN	L->R	Neu 1	23	4.6	CL3d
15	MN	L->R	Neu 2	22	4.4	CL3d
16	Mac 8	L->R	Neu 1	35	7	CL3d
17	Mac 8	L->R	Neu 2	46	9.2	CL3d
18	Mac 9	L->R	Neu 1	45	9	CL3d
19	Mac 9	L->R	Neu 2	47	9.4	CL3d

## Sheet: links for cytoscape 3d common
3dpci_Mac-ligand to Neu-receptor
Cluster pair ID	macrophage	pair type	neutrophil	no. pairs	edge width	condition
0	Mac 1	L->R	Neu 1	121	12.1	3d common
1	Mac 1	L->R	Neu 2	117	11.7	3d common
2	Mac 2	L->R	Neu 1	108	10.8	3d common
3	Mac 2	L->R	Neu 2	104	10.4	3d common
4	Mac 3	L->R	Neu 1	116	11.6	3d common
5	Mac 3	L->R	Neu 2	111	11.1	3d common
6	Mac 4	L->R	Neu 1	117	11.7	3d common
7	Mac 4	L->R	Neu 2	114	11.4	3d common
8	Mac 5	L->R	Neu 1	108	10.8	3d common
9	Mac 5	L->R	Neu 2	104	10.4	3d common
10	Mac 6	L->R	Neu 1	105	10.5	3d common
11	Mac 6	L->R	Neu 2	102	10.2	3d common
12	Mac 7	L->R	Neu 1	83	8.3	3d common
13	Mac 7	L->R	Neu 2	81	8.1	3d common
14	MN	L->R	Neu 1	103	10.3	3d common
15	MN	L->R	Neu 2	105	10.5	3d common
16	Mac 8	L->R	Neu 1	101	10.1	3d common
17	Mac 8	L->R	Neu 2	94	9.4	3d common
18	Mac 9	L->R	Neu 1	82	8.2	3d common
19	Mac 9	L->R	Neu 2	80	8	3d common

## Sheet: Sheet8
3dpci_Mac-ligand to Neu-receptor
cluster ID	type	PBS3d	CL3d	3d common	total	size PBS3d	size CL3d	size PBS3d+CL3d	size 3d common	size total
Mac 1	ligand	12	58	238	308	6	29	7	23.8
Mac 2	ligand	43	79	212	334	21.5	39.5	12.2	21.2
Mac 3	ligand	12	67	227	306	6	33.5	7.9	22.7
Mac 4	ligand	26	37	231	294	13	18.5	6.3	23.1
Mac 5	ligand	24	31	212	267	12	15.5	5.5	21.2
Mac 6	ligand	44	52	207	303	22	26	9.6	20.7
Mac 7	ligand	78	98	164	340	39	49	17.6	16.4
MN	ligand	34	45	208	287	17	22.5	7.9	20.8
Mac 8	ligand	71	81	195	347	35.5	40.5	15.2	19.5
Mac 9	ligand	42	92	162	296	21	46	13.4	16.2
Neu 1	receptor	199	294	1044	1537	19.9	29.4	49.3	104.4
Neu 2	receptor	187	346	1012	1545	18.7	34.6	53.3	101.2
