# Supplementary material for: Comparative single-cell profiling reveals distinct cardiac resident macrophages essential for zebrafish heart regeneration
Source: eLife. 2023 Jul 27;12:e84679. doi: 10.7554/eLife.84679 (PMC10411971; doi:10.7554/eLife.84679)
Supplement: Figure 5—source data 2. [file elife-84679-fig5-data2.xlsx]

## Sheet: statistics
7dpci_Mac-ligand to Neu-receptor
Cluster pair ID	macrophage	pair type	neutrophil	PBS7d specific	CL7d specific	7d common	total
0	Mac 1	L->R	Neu 1	17	18	100	135
1	Mac 1	L->R	Neu 2	23	16	108	147
2	Mac 2	L->R	Neu 1	48	28	88	164
3	Mac 2	L->R	Neu 2	59	30	94	183
4	Mac 3	L->R	Neu 1	15	35	93	143
5	Mac 3	L->R	Neu 2	21	34	100	155
6	Mac 4	L->R	Neu 1	26	22	93	141
7	Mac 4	L->R	Neu 2	33	20	99	152
8	Mac 5	L->R	Neu 1	14	15	93	122
9	Mac 5	L->R	Neu 2	23	11	98	132
10	Mac 6	L->R	Neu 1	22	21	88	131
11	Mac 6	L->R	Neu 2	31	20	93	144
12	Mac 7	L->R	Neu 1	26	29	85	140
13	Mac 7	L->R	Neu 2	33	26	92	151
14	MN	L->R	Neu 1	29	26	87	142
15	MN	L->R	Neu 2	38	25	92	155
16	Mac 8	L->R	Neu 1	58	28	49	135
17	Mac 8	L->R	Neu 2	70	29	53	152
18	Mac 9	L->R	Neu 1	20	20	70	110
19	Mac 9	L->R	Neu 2	28	19	72	119
	total			634	472	1747	2853
	mean			31.7	23.6	87.35
	%			22.2222	16.544	61.2338

## Sheet: PBS7d-specific
7dpci_Mac-ligand to Neu-receptor
Cluster pair ID	CT1	pair type	CT2	human L-R pair	L-R pair
0	Mac 1	L->R	Neu 1	ADAM17_ITGB1	adam17a_itgb1b
0	Mac 1	L->R	Neu 1	ADAM9_ITGB1	adam9_itgb1b
0	Mac 1	L->R	Neu 1	AFDN_F11R	afdna_f11r.1
0	Mac 1	L->R	Neu 1	APP_PTGER2	appa_ptger2a
0	Mac 1	L->R	Neu 1	APP_PTGER2	appb_ptger2a
0	Mac 1	L->R	Neu 1	CXCL9_CXCR3	cxcl11.5_cxcr3.3
0	Mac 1	L->R	Neu 1	F13A1_ITGB1	f13a1b_itgb1b
0	Mac 1	L->R	Neu 1	F13A1_ITGB1	f13a1a.1_itgb1b
0	Mac 1	L->R	Neu 1	FN1_ITGB1	fn1a_itgb1b
0	Mac 1	L->R	Neu 1	HGF_ITGB1	hgfb_itgb1b
0	Mac 1	L->R	Neu 1	HGF_ST14	hgfb_zmp:0000001114
0	Mac 1	L->R	Neu 1	HSPG2_ITGB1	hspg2_itgb1b
0	Mac 1	L->R	Neu 1	IGF2_IGF2R	igf2b_igf2r
0	Mac 1	L->R	Neu 1	LAMB1_ITGA1	lamb1b_itga1
0	Mac 1	L->R	Neu 1	LAMB1_ITGB1	lamb1b_itgb1b
0	Mac 1	L->R	Neu 1	LMAN1_MCFD2	lman1_mcfd2
0	Mac 1	L->R	Neu 1	TIMP2_ITGB1	timp2b_itgb1b
1	Mac 1	L->R	Neu 2	ACTR2_ADRB2	actr2a_adrb2a
1	Mac 1	L->R	Neu 2	ADAM17_ITGB1	adam17a_CABZ01058721.1
1	Mac 1	L->R	Neu 2	ADAM9_ITGB1	adam9_CABZ01058721.1
1	Mac 1	L->R	Neu 2	AFDN_F11R	afdna_f11r.1
1	Mac 1	L->R	Neu 2	AFDN_NECTIN1	afdna_si:dkey-15j16.3
1	Mac 1	L->R	Neu 2	ANGPTL4_TIE1	angptl4_tie1
1	Mac 1	L->R	Neu 2	ARPC5_ADRB2	arpc5a_adrb2a
1	Mac 1	L->R	Neu 2	ARPC5_ADRB2	arpc5b_adrb2a
1	Mac 1	L->R	Neu 2	CSF3_CSF1R	csf3b_csf1ra
1	Mac 1	L->R	Neu 2	CXCL9_CXCR3	cxcl11.5_cxcr3.3
1	Mac 1	L->R	Neu 2	F13A1_ITGB1	f13a1b_CABZ01058721.1
1	Mac 1	L->R	Neu 2	F13A1_ITGB1	f13a1a.1_CABZ01058721.1
1	Mac 1	L->R	Neu 2	FN1_ITGB1	fn1a_CABZ01058721.1
1	Mac 1	L->R	Neu 2	HGF_ITGB1	hgfb_CABZ01058721.1
1	Mac 1	L->R	Neu 2	HSPA8_ADRB2	hspa8_adrb2a
1	Mac 1	L->R	Neu 2	HSPG2_ITGB1	hspg2_CABZ01058721.1
1	Mac 1	L->R	Neu 2	IGF2_IGF2R	igf2b_igf2r
1	Mac 1	L->R	Neu 2	IL1B_ADRB2	il1b_adrb2a
1	Mac 1	L->R	Neu 2	IL1B_IL1R1	il1b_zmp:0000000936
1	Mac 1	L->R	Neu 2	IRAK4_TLR6	irak4_tlr1
1	Mac 1	L->R	Neu 2	LAMB1_ITGB1	lamb1b_CABZ01058721.1
1	Mac 1	L->R	Neu 2	TIMP2_ITGB1	timp2b_CABZ01058721.1
1	Mac 1	L->R	Neu 2	UBA52_TGFBR2	uba52_tgfbr2a
2	Mac 2	L->R	Neu 1	ADAM17_ITGB1	adam17a_itgb1b
2	Mac 2	L->R	Neu 1	ADAM9_ITGB1	adam9_itgb1b
2	Mac 2	L->R	Neu 1	ADM_GPR84	adma_gpr84
2	Mac 2	L->R	Neu 1	ADM_GPR84	admb_gpr84
2	Mac 2	L->R	Neu 1	APP_PTGER2	appa_ptger2a
2	Mac 2	L->R	Neu 1	APP_AGER	appb_si:ch211-79k12.1
2	Mac 2	L->R	Neu 1	APP_APLP2	appb_aplp2
2	Mac 2	L->R	Neu 1	APP_CD74	appb_cd74a
2	Mac 2	L->R	Neu 1	APP_CD74	appb_cd74b
2	Mac 2	L->R	Neu 1	APP_LRP10	appb_lrp10
2	Mac 2	L->R	Neu 1	APP_NOTCH2	appb_notch2
2	Mac 2	L->R	Neu 1	APP_PTGER2	appb_ptger2a
2	Mac 2	L->R	Neu 1	APP_RPSA	appb_rpsa
2	Mac 2	L->R	Neu 1	COL1A1_ITGA1	col1a1a_itga1
2	Mac 2	L->R	Neu 1	COL1A1_ITGA5	col1a1a_itga5
2	Mac 2	L->R	Neu 1	COL1A1_ITGAV	col1a1a_itgav
2	Mac 2	L->R	Neu 1	COL1A1_ITGB1	col1a1a_itgb1b
2	Mac 2	L->R	Neu 1	COL1A2_ITGA1	col1a2_itga1
2	Mac 2	L->R	Neu 1	COL1A2_ITGAV	col1a2_itgav
2	Mac 2	L->R	Neu 1	COL1A2_ITGB1	col1a2_itgb1b
2	Mac 2	L->R	Neu 1	CXCL9_CXCR3	cxcl11.6_cxcr3.3
2	Mac 2	L->R	Neu 1	CXCL9_CXCR3	cxcl11.5_cxcr3.3
2	Mac 2	L->R	Neu 1	CXCL9_CXCR3	BX323596.1_cxcr3.3
2	Mac 2	L->R	Neu 1	F13A1_ITGB1	f13a1b_itgb1b
2	Mac 2	L->R	Neu 1	F13A1_ITGB1	f13a1a.1_itgb1b
2	Mac 2	L->R	Neu 1	FN1_C5AR1	fn1b_CABZ01041494.1
2	Mac 2	L->R	Neu 1	FN1_ITGA4	fn1b_itga4
2	Mac 2	L->R	Neu 1	FN1_ITGA5	fn1b_itga5
2	Mac 2	L->R	Neu 1	FN1_ITGAV	fn1b_itgav
2	Mac 2	L->R	Neu 1	FN1_ITGB1	fn1b_itgb1b
2	Mac 2	L->R	Neu 1	FN1_ITGB1	fn1a_itgb1b
2	Mac 2	L->R	Neu 1	HMGB1_AGER	hmgb1b_si:ch211-79k12.1
2	Mac 2	L->R	Neu 1	HMGB1_CXCR4	hmgb1b_cxcr4a
2	Mac 2	L->R	Neu 1	HMGB1_CXCR4	hmgb1b_cxcr4b
2	Mac 2	L->R	Neu 1	IGF2_IGF2R	igf2b_igf2r
2	Mac 2	L->R	Neu 1	LMAN1_MCFD2	lman1_mcfd2
2	Mac 2	L->R	Neu 1	LTF_TFRC	tfa_tfr1b
2	Mac 2	L->R	Neu 1	MDK_ITGA4	mdka_itga4
2	Mac 2	L->R	Neu 1	MDK_ITGB1	mdka_itgb1b
2	Mac 2	L->R	Neu 1	MDK_SDC4	mdka_sdc4
2	Mac 2	L->R	Neu 1	MFGE8_ITGAV	mfge8a_itgav
2	Mac 2	L->R	Neu 1	PSEN1_NOTCH2	psen1_notch2
2	Mac 2	L->R	Neu 1	PTGS2_ALOX5	ptgs2a_alox5a
2	Mac 2	L->R	Neu 1	THBS1_ITGA4	thbs1b_itga4
2	Mac 2	L->R	Neu 1	THBS1_ITGB1	thbs1b_itgb1b
2	Mac 2	L->R	Neu 1	THBS1_SDC4	thbs1b_sdc4
2	Mac 2	L->R	Neu 1	TIMP2_ITGB1	timp2b_itgb1b
2	Mac 2	L->R	Neu 1	TNFSF13B_TFRC	tnfsf13b_tfr1b
3	Mac 2	L->R	Neu 2	ACTR2_ADRB2	actr2a_adrb2a
3	Mac 2	L->R	Neu 2	ADAM17_ITGB1	adam17a_CABZ01058721.1
3	Mac 2	L->R	Neu 2	ADAM9_ITGB1	adam9_CABZ01058721.1
3	Mac 2	L->R	Neu 2	ADM_ADRB2	adma_adrb2a
3	Mac 2	L->R	Neu 2	ADM_GPR84	adma_gpr84
3	Mac 2	L->R	Neu 2	ADM_ADRB2	admb_adrb2a
3	Mac 2	L->R	Neu 2	ADM_GPR84	admb_gpr84
3	Mac 2	L->R	Neu 2	APP_AGER	appb_si:ch211-79k12.1
3	Mac 2	L->R	Neu 2	APP_APLP2	appb_aplp2
3	Mac 2	L->R	Neu 2	APP_CD74	appb_cd74a
3	Mac 2	L->R	Neu 2	APP_CD74	appb_cd74b
3	Mac 2	L->R	Neu 2	APP_LRP10	appb_lrp10
3	Mac 2	L->R	Neu 2	APP_NOTCH2	appb_notch2
3	Mac 2	L->R	Neu 2	APP_RPSA	appb_rpsa
3	Mac 2	L->R	Neu 2	ARPC5_ADRB2	arpc5a_adrb2a
3	Mac 2	L->R	Neu 2	ARPC5_ADRB2	arpc5b_adrb2a
3	Mac 2	L->R	Neu 2	COL1A1_ITGA5	col1a1a_itga5
3	Mac 2	L->R	Neu 2	COL1A1_ITGAV	col1a1a_itgav
3	Mac 2	L->R	Neu 2	COL1A1_ITGB1	col1a1a_CABZ01058721.1
3	Mac 2	L->R	Neu 2	COL1A1_ITGB1	col1a1a_itgb1b
3	Mac 2	L->R	Neu 2	COL1A2_ITGAV	col1a2_itgav
3	Mac 2	L->R	Neu 2	COL1A2_ITGB1	col1a2_CABZ01058721.1
3	Mac 2	L->R	Neu 2	COL1A2_ITGB1	col1a2_itgb1b
3	Mac 2	L->R	Neu 2	CSF3_CSF1R	csf3b_csf1ra
3	Mac 2	L->R	Neu 2	CXCL9_CXCR3	cxcl11.6_cxcr3.3
3	Mac 2	L->R	Neu 2	CXCL9_CXCR3	cxcl11.5_cxcr3.3
3	Mac 2	L->R	Neu 2	CXCL9_CXCR3	BX323596.1_cxcr3.3
3	Mac 2	L->R	Neu 2	F13A1_ITGB1	f13a1b_CABZ01058721.1
3	Mac 2	L->R	Neu 2	F13A1_ITGB1	f13a1a.1_CABZ01058721.1
3	Mac 2	L->R	Neu 2	FN1_C5AR1	fn1b_CABZ01041494.1
3	Mac 2	L->R	Neu 2	FN1_ITGA4	fn1b_itga4
3	Mac 2	L->R	Neu 2	FN1_ITGA5	fn1b_itga5
3	Mac 2	L->R	Neu 2	FN1_ITGAV	fn1b_itgav
3	Mac 2	L->R	Neu 2	FN1_ITGB1	fn1b_CABZ01058721.1
3	Mac 2	L->R	Neu 2	FN1_ITGB1	fn1b_itgb1b
3	Mac 2	L->R	Neu 2	FN1_ITGB1	fn1a_CABZ01058721.1
3	Mac 2	L->R	Neu 2	HMGB1_AGER	hmgb1b_si:ch211-79k12.1
3	Mac 2	L->R	Neu 2	HMGB1_CXCR4	hmgb1b_cxcr4a
3	Mac 2	L->R	Neu 2	HMGB1_CXCR4	hmgb1b_cxcr4b
3	Mac 2	L->R	Neu 2	HSPA8_ADRB2	hspa8_adrb2a
3	Mac 2	L->R	Neu 2	IGF2_IGF2R	igf2b_igf2r
3	Mac 2	L->R	Neu 2	IL1B_ADRB2	il1b_adrb2a
3	Mac 2	L->R	Neu 2	IL1B_IL1R1	il1b_zmp:0000000936
3	Mac 2	L->R	Neu 2	IRAK4_TLR6	irak4_tlr1
3	Mac 2	L->R	Neu 2	LTF_TFRC	tfa_tfr1b
3	Mac 2	L->R	Neu 2	MDK_ITGA4	mdka_itga4
3	Mac 2	L->R	Neu 2	MDK_ITGB1	mdka_CABZ01058721.1
3	Mac 2	L->R	Neu 2	MDK_ITGB1	mdka_itgb1b
3	Mac 2	L->R	Neu 2	MDK_SDC4	mdka_sdc4
3	Mac 2	L->R	Neu 2	MFGE8_ITGAV	mfge8a_itgav
3	Mac 2	L->R	Neu 2	PSEN1_NOTCH2	psen1_notch2
3	Mac 2	L->R	Neu 2	PTGS2_ALOX5	ptgs2a_alox5a
3	Mac 2	L->R	Neu 2	THBS1_ITGA4	thbs1b_itga4
3	Mac 2	L->R	Neu 2	THBS1_ITGB1	thbs1b_CABZ01058721.1
3	Mac 2	L->R	Neu 2	THBS1_ITGB1	thbs1b_itgb1b
3	Mac 2	L->R	Neu 2	THBS1_SDC4	thbs1b_sdc4
3	Mac 2	L->R	Neu 2	TIMP2_ITGB1	timp2b_CABZ01058721.1
3	Mac 2	L->R	Neu 2	TNFSF13B_TFRC	tnfsf13b_tfr1b
3	Mac 2	L->R	Neu 2	UBA52_TGFBR2	uba52_tgfbr2a
4	Mac 3	L->R	Neu 1	ADAM17_ITGB1	adam17a_itgb1b
4	Mac 3	L->R	Neu 1	ADAM9_ITGB1	adam9_itgb1b
4	Mac 3	L->R	Neu 1	APP_PTGER2	appa_ptger2a
4	Mac 3	L->R	Neu 1	APP_PTGER2	appb_ptger2a
4	Mac 3	L->R	Neu 1	CXCL9_CXCR3	cxcl11.5_cxcr3.3
4	Mac 3	L->R	Neu 1	CXCL9_CXCR3	BX323596.1_cxcr3.3
4	Mac 3	L->R	Neu 1	F13A1_ITGB1	f13a1b_itgb1b
4	Mac 3	L->R	Neu 1	F13A1_ITGB1	f13a1a.1_itgb1b
4	Mac 3	L->R	Neu 1	FN1_ITGB1	fn1a_itgb1b
4	Mac 3	L->R	Neu 1	HGF_ITGB1	hgfb_itgb1b
4	Mac 3	L->R	Neu 1	HGF_ST14	hgfb_zmp:0000001114
4	Mac 3	L->R	Neu 1	ICAM3_ITGB2	si:ch73-208g10.1_itgb2
4	Mac 3	L->R	Neu 1	IGF2_IGF2R	igf2b_igf2r
4	Mac 3	L->R	Neu 1	LMAN1_MCFD2	lman1_mcfd2
4	Mac 3	L->R	Neu 1	TIMP2_ITGB1	timp2b_itgb1b
5	Mac 3	L->R	Neu 2	ACTR2_ADRB2	actr2a_adrb2a
5	Mac 3	L->R	Neu 2	ADAM17_ITGB1	adam17a_CABZ01058721.1
5	Mac 3	L->R	Neu 2	ADAM9_ITGB1	adam9_CABZ01058721.1
5	Mac 3	L->R	Neu 2	ARPC5_ADRB2	arpc5a_adrb2a
5	Mac 3	L->R	Neu 2	ARPC5_ADRB2	arpc5b_adrb2a
5	Mac 3	L->R	Neu 2	CSF3_CSF1R	csf3a_csf1ra
5	Mac 3	L->R	Neu 2	CSF3_CSF1R	csf3b_csf1ra
5	Mac 3	L->R	Neu 2	CXCL9_CXCR3	cxcl11.5_cxcr3.3
5	Mac 3	L->R	Neu 2	CXCL9_CXCR3	BX323596.1_cxcr3.3
5	Mac 3	L->R	Neu 2	F13A1_ITGB1	f13a1b_CABZ01058721.1
5	Mac 3	L->R	Neu 2	F13A1_ITGB1	f13a1a.1_CABZ01058721.1
5	Mac 3	L->R	Neu 2	FN1_ITGB1	fn1a_CABZ01058721.1
5	Mac 3	L->R	Neu 2	HGF_ITGB1	hgfb_CABZ01058721.1
5	Mac 3	L->R	Neu 2	HSPA8_ADRB2	hspa8_adrb2a
5	Mac 3	L->R	Neu 2	ICAM3_ITGB2	si:ch73-208g10.1_itgb2
5	Mac 3	L->R	Neu 2	IGF2_IGF2R	igf2b_igf2r
5	Mac 3	L->R	Neu 2	IL1B_ADRB2	il1b_adrb2a
5	Mac 3	L->R	Neu 2	IL1B_IL1R1	il1b_zmp:0000000936
5	Mac 3	L->R	Neu 2	IRAK4_TLR6	irak4_tlr1
5	Mac 3	L->R	Neu 2	TIMP2_ITGB1	timp2b_CABZ01058721.1
5	Mac 3	L->R	Neu 2	UBA52_TGFBR2	uba52_tgfbr2a
6	Mac 4	L->R	Neu 1	ADAM17_ITGB1	adam17a_itgb1b
6	Mac 4	L->R	Neu 1	ADAM9_ITGB1	adam9_itgb1b
6	Mac 4	L->R	Neu 1	APP_PTGER2	appa_ptger2a
6	Mac 4	L->R	Neu 1	APP_AGER	appb_si:ch211-79k12.1
6	Mac 4	L->R	Neu 1	APP_APLP2	appb_aplp2
6	Mac 4	L->R	Neu 1	APP_CD74	appb_cd74a
6	Mac 4	L->R	Neu 1	APP_CD74	appb_cd74b
6	Mac 4	L->R	Neu 1	APP_LRP10	appb_lrp10
6	Mac 4	L->R	Neu 1	APP_NOTCH2	appb_notch2
6	Mac 4	L->R	Neu 1	APP_PTGER2	appb_ptger2a
6	Mac 4	L->R	Neu 1	APP_RPSA	appb_rpsa
6	Mac 4	L->R	Neu 1	CXCL9_CXCR3	cxcl11.6_cxcr3.3
6	Mac 4	L->R	Neu 1	CXCL9_CXCR3	cxcl11.5_cxcr3.3
6	Mac 4	L->R	Neu 1	CXCL9_CXCR3	BX323596.1_cxcr3.3
6	Mac 4	L->R	Neu 1	F13A1_ITGB1	f13a1b_itgb1b
6	Mac 4	L->R	Neu 1	F13A1_ITGB1	f13a1a.1_itgb1b
6	Mac 4	L->R	Neu 1	FN1_ITGB1	fn1a_itgb1b
6	Mac 4	L->R	Neu 1	HGF_ITGB1	hgfb_itgb1b
6	Mac 4	L->R	Neu 1	HGF_ST14	hgfb_zmp:0000001114
6	Mac 4	L->R	Neu 1	IGF2_IGF2R	igf2b_igf2r
6	Mac 4	L->R	Neu 1	LAMA2_ITGA1	CABZ01092781.1_itga1
6	Mac 4	L->R	Neu 1	LAMA2_ITGB1	CABZ01092781.1_itgb1b
6	Mac 4	L->R	Neu 1	LAMA2_RPSA	CABZ01092781.1_rpsa
6	Mac 4	L->R	Neu 1	LMAN1_MCFD2	lman1_mcfd2
6	Mac 4	L->R	Neu 1	S100A1_AGER	s100a1_si:ch211-79k12.1
6	Mac 4	L->R	Neu 1	TIMP2_ITGB1	timp2b_itgb1b
7	Mac 4	L->R	Neu 2	ACTR2_ADRB2	actr2a_adrb2a
7	Mac 4	L->R	Neu 2	ADAM17_ITGB1	adam17a_CABZ01058721.1
7	Mac 4	L->R	Neu 2	ADAM9_ITGB1	adam9_CABZ01058721.1
7	Mac 4	L->R	Neu 2	APP_AGER	appb_si:ch211-79k12.1
7	Mac 4	L->R	Neu 2	APP_APLP2	appb_aplp2
7	Mac 4	L->R	Neu 2	APP_CD74	appb_cd74a
7	Mac 4	L->R	Neu 2	APP_CD74	appb_cd74b
7	Mac 4	L->R	Neu 2	APP_LRP10	appb_lrp10
7	Mac 4	L->R	Neu 2	APP_NOTCH2	appb_notch2
7	Mac 4	L->R	Neu 2	APP_RPSA	appb_rpsa
7	Mac 4	L->R	Neu 2	ARPC5_ADRB2	arpc5a_adrb2a
7	Mac 4	L->R	Neu 2	ARPC5_ADRB2	arpc5b_adrb2a
7	Mac 4	L->R	Neu 2	CSF3_CSF1R	csf3a_csf1ra
7	Mac 4	L->R	Neu 2	CSF3_CSF1R	csf3b_csf1ra
7	Mac 4	L->R	Neu 2	CXCL9_CXCR3	cxcl11.6_cxcr3.3
7	Mac 4	L->R	Neu 2	CXCL9_CXCR3	cxcl11.5_cxcr3.3
7	Mac 4	L->R	Neu 2	CXCL9_CXCR3	BX323596.1_cxcr3.3
7	Mac 4	L->R	Neu 2	F13A1_ITGB1	f13a1b_CABZ01058721.1
7	Mac 4	L->R	Neu 2	F13A1_ITGB1	f13a1a.1_CABZ01058721.1
7	Mac 4	L->R	Neu 2	FN1_ITGB1	fn1a_CABZ01058721.1
7	Mac 4	L->R	Neu 2	HGF_ITGB1	hgfb_CABZ01058721.1
7	Mac 4	L->R	Neu 2	HGF_ITGB1	hgfb_itgb1b
7	Mac 4	L->R	Neu 2	HSPA8_ADRB2	hspa8_adrb2a
7	Mac 4	L->R	Neu 2	IGF2_IGF2R	igf2b_igf2r
7	Mac 4	L->R	Neu 2	IL1B_ADRB2	il1b_adrb2a
7	Mac 4	L->R	Neu 2	IL1B_IL1R1	il1b_zmp:0000000936
7	Mac 4	L->R	Neu 2	IRAK4_TLR6	irak4_tlr1
7	Mac 4	L->R	Neu 2	LAMA2_ITGB1	CABZ01092781.1_CABZ01058721.1
7	Mac 4	L->R	Neu 2	LAMA2_ITGB1	CABZ01092781.1_itgb1b
7	Mac 4	L->R	Neu 2	LAMA2_RPSA	CABZ01092781.1_rpsa
7	Mac 4	L->R	Neu 2	S100A1_AGER	s100a1_si:ch211-79k12.1
7	Mac 4	L->R	Neu 2	TIMP2_ITGB1	timp2b_CABZ01058721.1
7	Mac 4	L->R	Neu 2	UBA52_TGFBR2	uba52_tgfbr2a
8	Mac 5	L->R	Neu 1	ADAM17_ITGB1	adam17a_itgb1b
8	Mac 5	L->R	Neu 1	ADAM9_ITGB1	adam9_itgb1b
8	Mac 5	L->R	Neu 1	APP_PTGER2	appa_ptger2a
8	Mac 5	L->R	Neu 1	CXCL9_CXCR3	cxcl11.6_cxcr3.3
8	Mac 5	L->R	Neu 1	CXCL9_CXCR3	cxcl11.5_cxcr3.3
8	Mac 5	L->R	Neu 1	F13A1_ITGB1	f13a1b_itgb1b
8	Mac 5	L->R	Neu 1	F13A1_ITGA4	f13a1a.1_itga4
8	Mac 5	L->R	Neu 1	F13A1_ITGB1	f13a1a.1_itgb1b
8	Mac 5	L->R	Neu 1	FN1_ITGB1	fn1a_itgb1b
8	Mac 5	L->R	Neu 1	IGF2_IGF2R	igf2b_igf2r
8	Mac 5	L->R	Neu 1	LMAN1_MCFD2	lman1_mcfd2
8	Mac 5	L->R	Neu 1	TIMP2_ITGB1	timp2b_itgb1b
8	Mac 5	L->R	Neu 1	TNF_TNFRSF1B	tnfa_tnfrsf1b
8	Mac 5	L->R	Neu 1	TNF_TRADD	tnfa_tradd
9	Mac 5	L->R	Neu 2	ACTR2_ADRB2	actr2a_adrb2a
9	Mac 5	L->R	Neu 2	ADAM17_ITGB1	adam17a_CABZ01058721.1
9	Mac 5	L->R	Neu 2	ADAM9_ITGB1	adam9_CABZ01058721.1
9	Mac 5	L->R	Neu 2	ARPC5_ADRB2	arpc5a_adrb2a
9	Mac 5	L->R	Neu 2	ARPC5_ADRB2	arpc5b_adrb2a
9	Mac 5	L->R	Neu 2	CSF3_CSF1R	csf3a_csf1ra
9	Mac 5	L->R	Neu 2	CSF3_CSF1R	csf3b_csf1ra
9	Mac 5	L->R	Neu 2	CXCL9_CXCR3	cxcl11.6_cxcr3.3
9	Mac 5	L->R	Neu 2	CXCL9_CXCR3	cxcl11.5_cxcr3.3
9	Mac 5	L->R	Neu 2	F13A1_ITGB1	f13a1b_CABZ01058721.1
9	Mac 5	L->R	Neu 2	F13A1_ITGA4	f13a1a.1_itga4
9	Mac 5	L->R	Neu 2	F13A1_ITGB1	f13a1a.1_CABZ01058721.1
9	Mac 5	L->R	Neu 2	F13A1_ITGB1	f13a1a.1_itgb1b
9	Mac 5	L->R	Neu 2	FN1_ITGB1	fn1a_CABZ01058721.1
9	Mac 5	L->R	Neu 2	HSPA8_ADRB2	hspa8_adrb2a
9	Mac 5	L->R	Neu 2	IGF2_IGF2R	igf2b_igf2r
9	Mac 5	L->R	Neu 2	IL1B_ADRB2	il1b_adrb2a
9	Mac 5	L->R	Neu 2	IL1B_IL1R1	il1b_zmp:0000000936
9	Mac 5	L->R	Neu 2	IRAK4_TLR6	irak4_tlr1
9	Mac 5	L->R	Neu 2	TIMP2_ITGB1	timp2b_CABZ01058721.1
9	Mac 5	L->R	Neu 2	TNF_TNFRSF1A	tnfa_fas
9	Mac 5	L->R	Neu 2	TNF_TRADD	tnfa_tradd
9	Mac 5	L->R	Neu 2	UBA52_TGFBR2	uba52_tgfbr2a
10	Mac 6	L->R	Neu 1	ADAM17_ITGB1	adam17a_itgb1b
10	Mac 6	L->R	Neu 1	ADAM9_ITGB1	adam9_itgb1b
10	Mac 6	L->R	Neu 1	APP_PTGER2	appa_ptger2a
10	Mac 6	L->R	Neu 1	APP_AGER	appb_si:ch211-79k12.1
10	Mac 6	L->R	Neu 1	APP_APLP2	appb_aplp2
10	Mac 6	L->R	Neu 1	APP_CD74	appb_cd74a
10	Mac 6	L->R	Neu 1	APP_CD74	appb_cd74b
10	Mac 6	L->R	Neu 1	APP_LRP10	appb_lrp10
10	Mac 6	L->R	Neu 1	APP_NOTCH2	appb_notch2
10	Mac 6	L->R	Neu 1	APP_PTGER2	appb_ptger2a
10	Mac 6	L->R	Neu 1	APP_RPSA	appb_rpsa
10	Mac 6	L->R	Neu 1	C3_CD81	c3a.1_cd81a
10	Mac 6	L->R	Neu 1	C3_ITGAX	c3a.1_si:dkey-32n7.4
10	Mac 6	L->R	Neu 1	C3_ITGB2	c3a.1_itgb2
10	Mac 6	L->R	Neu 1	CXCL9_CXCR3	cxcl11.6_cxcr3.3
10	Mac 6	L->R	Neu 1	F13A1_ITGB1	f13a1b_itgb1b
10	Mac 6	L->R	Neu 1	F13A1_ITGA4	f13a1a.1_itga4
10	Mac 6	L->R	Neu 1	F13A1_ITGB1	f13a1a.1_itgb1b
10	Mac 6	L->R	Neu 1	FN1_ITGB1	fn1a_itgb1b
10	Mac 6	L->R	Neu 1	IGF2_IGF2R	igf2b_igf2r
10	Mac 6	L->R	Neu 1	LMAN1_MCFD2	lman1_mcfd2
10	Mac 6	L->R	Neu 1	TIMP2_ITGB1	timp2b_itgb1b
11	Mac 6	L->R	Neu 2	ACTR2_ADRB2	actr2a_adrb2a
11	Mac 6	L->R	Neu 2	ADAM17_ITGB1	adam17a_CABZ01058721.1
11	Mac 6	L->R	Neu 2	ADAM9_ITGB1	adam9_CABZ01058721.1
11	Mac 6	L->R	Neu 2	APP_AGER	appb_si:ch211-79k12.1
11	Mac 6	L->R	Neu 2	APP_APLP2	appb_aplp2
11	Mac 6	L->R	Neu 2	APP_CD74	appb_cd74a
11	Mac 6	L->R	Neu 2	APP_CD74	appb_cd74b
11	Mac 6	L->R	Neu 2	APP_LRP10	appb_lrp10
11	Mac 6	L->R	Neu 2	APP_NOTCH2	appb_notch2
11	Mac 6	L->R	Neu 2	APP_RPSA	appb_rpsa
11	Mac 6	L->R	Neu 2	ARPC5_ADRB2	arpc5a_adrb2a
11	Mac 6	L->R	Neu 2	ARPC5_ADRB2	arpc5b_adrb2a
11	Mac 6	L->R	Neu 2	C3_CD81	c3a.1_cd81a
11	Mac 6	L->R	Neu 2	C3_ITGAX	c3a.1_si:dkey-32n7.4
11	Mac 6	L->R	Neu 2	C3_ITGAX	c3a.1_itgam
11	Mac 6	L->R	Neu 2	C3_ITGB2	c3a.1_itgb2
11	Mac 6	L->R	Neu 2	CSF3_CSF1R	csf3a_csf1ra
11	Mac 6	L->R	Neu 2	CSF3_CSF1R	csf3b_csf1ra
11	Mac 6	L->R	Neu 2	CXCL9_CXCR3	cxcl11.6_cxcr3.3
11	Mac 6	L->R	Neu 2	F13A1_ITGB1	f13a1b_CABZ01058721.1
11	Mac 6	L->R	Neu 2	F13A1_ITGA4	f13a1a.1_itga4
11	Mac 6	L->R	Neu 2	F13A1_ITGB1	f13a1a.1_CABZ01058721.1
11	Mac 6	L->R	Neu 2	F13A1_ITGB1	f13a1a.1_itgb1b
11	Mac 6	L->R	Neu 2	FN1_ITGB1	fn1a_CABZ01058721.1
11	Mac 6	L->R	Neu 2	HSPA8_ADRB2	hspa8_adrb2a
11	Mac 6	L->R	Neu 2	IGF2_IGF2R	igf2b_igf2r
11	Mac 6	L->R	Neu 2	IL1B_ADRB2	il1b_adrb2a
11	Mac 6	L->R	Neu 2	IL1B_IL1R1	il1b_zmp:0000000936
11	Mac 6	L->R	Neu 2	IRAK4_TLR6	irak4_tlr1
11	Mac 6	L->R	Neu 2	TIMP2_ITGB1	timp2b_CABZ01058721.1
11	Mac 6	L->R	Neu 2	UBA52_TGFBR2	uba52_tgfbr2a
12	Mac 7	L->R	Neu 1	ADAM17_ITGB1	adam17a_itgb1b
12	Mac 7	L->R	Neu 1	ADAM9_ITGB1	adam9_itgb1b
12	Mac 7	L->R	Neu 1	APP_PTGER2	appa_ptger2a
12	Mac 7	L->R	Neu 1	APP_AGER	appb_si:ch211-79k12.1
12	Mac 7	L->R	Neu 1	APP_APLP2	appb_aplp2
12	Mac 7	L->R	Neu 1	APP_CD74	appb_cd74a
12	Mac 7	L->R	Neu 1	APP_CD74	appb_cd74b
12	Mac 7	L->R	Neu 1	APP_LRP10	appb_lrp10
12	Mac 7	L->R	Neu 1	APP_NOTCH2	appb_notch2
12	Mac 7	L->R	Neu 1	APP_PTGER2	appb_ptger2a
12	Mac 7	L->R	Neu 1	APP_RPSA	appb_rpsa
12	Mac 7	L->R	Neu 1	CSF3_CSF3R	csf3a_csf3r
12	Mac 7	L->R	Neu 1	CXCL9_CXCR3	cxcl11.6_cxcr3.3
12	Mac 7	L->R	Neu 1	CXCL9_CXCR3	cxcl11.5_cxcr3.3
12	Mac 7	L->R	Neu 1	CXCL9_CXCR3	BX323596.1_cxcr3.3
12	Mac 7	L->R	Neu 1	F13A1_ITGB1	f13a1b_itgb1b
12	Mac 7	L->R	Neu 1	F13A1_ITGB1	f13a1a.1_itgb1b
12	Mac 7	L->R	Neu 1	FN1_ITGB1	fn1a_itgb1b
12	Mac 7	L->R	Neu 1	IGF2_IGF2R	igf2b_igf2r
12	Mac 7	L->R	Neu 1	LAMA2_ITGA1	CABZ01092781.1_itga1
12	Mac 7	L->R	Neu 1	LAMA2_ITGB1	CABZ01092781.1_itgb1b
12	Mac 7	L->R	Neu 1	LAMA2_RPSA	CABZ01092781.1_rpsa
12	Mac 7	L->R	Neu 1	LMAN1_MCFD2	lman1_mcfd2
12	Mac 7	L->R	Neu 1	MFGE8_ITGAV	mfge8a_itgav
12	Mac 7	L->R	Neu 1	TIMP2_ITGB1	timp2b_itgb1b
12	Mac 7	L->R	Neu 1	TIMP2_ITGB1	timp2a_itgb1b
13	Mac 7	L->R	Neu 2	ACTR2_ADRB2	actr2a_adrb2a
13	Mac 7	L->R	Neu 2	ADAM17_ITGB1	adam17a_CABZ01058721.1
13	Mac 7	L->R	Neu 2	ADAM9_ITGB1	adam9_CABZ01058721.1
13	Mac 7	L->R	Neu 2	APP_AGER	appb_si:ch211-79k12.1
13	Mac 7	L->R	Neu 2	APP_APLP2	appb_aplp2
13	Mac 7	L->R	Neu 2	APP_CD74	appb_cd74a
13	Mac 7	L->R	Neu 2	APP_CD74	appb_cd74b
13	Mac 7	L->R	Neu 2	APP_LRP10	appb_lrp10
13	Mac 7	L->R	Neu 2	APP_NOTCH2	appb_notch2
13	Mac 7	L->R	Neu 2	APP_RPSA	appb_rpsa
13	Mac 7	L->R	Neu 2	ARPC5_ADRB2	arpc5a_adrb2a
13	Mac 7	L->R	Neu 2	ARPC5_ADRB2	arpc5b_adrb2a
13	Mac 7	L->R	Neu 2	CSF3_CSF1R	csf3a_csf1ra
13	Mac 7	L->R	Neu 2	CSF3_CSF3R	csf3a_csf3r
13	Mac 7	L->R	Neu 2	CSF3_CSF1R	csf3b_csf1ra
13	Mac 7	L->R	Neu 2	CXCL9_CXCR3	cxcl11.6_cxcr3.3
13	Mac 7	L->R	Neu 2	CXCL9_CXCR3	cxcl11.5_cxcr3.3
13	Mac 7	L->R	Neu 2	CXCL9_CXCR3	BX323596.1_cxcr3.3
13	Mac 7	L->R	Neu 2	F13A1_ITGB1	f13a1b_CABZ01058721.1
13	Mac 7	L->R	Neu 2	F13A1_ITGB1	f13a1a.1_CABZ01058721.1
13	Mac 7	L->R	Neu 2	FN1_ITGB1	fn1a_CABZ01058721.1
13	Mac 7	L->R	Neu 2	HSPA8_ADRB2	hspa8_adrb2a
13	Mac 7	L->R	Neu 2	IGF2_IGF2R	igf2b_igf2r
13	Mac 7	L->R	Neu 2	IL1B_ADRB2	il1b_adrb2a
13	Mac 7	L->R	Neu 2	IL1B_IL1R1	il1b_zmp:0000000936
13	Mac 7	L->R	Neu 2	IRAK4_TLR6	irak4_tlr1
13	Mac 7	L->R	Neu 2	LAMA2_ITGB1	CABZ01092781.1_CABZ01058721.1
13	Mac 7	L->R	Neu 2	LAMA2_ITGB1	CABZ01092781.1_itgb1b
13	Mac 7	L->R	Neu 2	LAMA2_RPSA	CABZ01092781.1_rpsa
13	Mac 7	L->R	Neu 2	MFGE8_ITGAV	mfge8a_itgav
13	Mac 7	L->R	Neu 2	TIMP2_ITGB1	timp2b_CABZ01058721.1
13	Mac 7	L->R	Neu 2	TIMP2_ITGB1	timp2a_CABZ01058721.1
13	Mac 7	L->R	Neu 2	UBA52_TGFBR2	uba52_tgfbr2a
14	MN	L->R	Neu 1	ADAM17_ITGB1	adam17a_itgb1b
14	MN	L->R	Neu 1	ADAM9_ITGB1	adam9_itgb1b
14	MN	L->R	Neu 1	APP_PTGER2	appa_ptger2a
14	MN	L->R	Neu 1	CALR_ITGAV	calr_itgav
14	MN	L->R	Neu 1	F13A1_ITGB1	f13a1b_itgb1b
14	MN	L->R	Neu 1	F13A1_ITGB1	f13a1a.1_itgb1b
14	MN	L->R	Neu 1	FN1_C5AR1	fn1a_CABZ01041494.1
14	MN	L->R	Neu 1	FN1_ITGA4	fn1a_itga4
14	MN	L->R	Neu 1	FN1_ITGA5	fn1a_itga5
14	MN	L->R	Neu 1	FN1_ITGAV	fn1a_itgav
14	MN	L->R	Neu 1	FN1_ITGB1	fn1a_itgb1b
14	MN	L->R	Neu 1	IGF2_IGF2R	igf2b_igf2r
14	MN	L->R	Neu 1	IL15_IL15RA	il15_il15ra
14	MN	L->R	Neu 1	IL15_IL2RB	il15_csf2rb
14	MN	L->R	Neu 1	IL15_IL2RB	il15_il21r.1
14	MN	L->R	Neu 1	IL15_IL15RA	il15l_il15ra
14	MN	L->R	Neu 1	IL15_IL2RB	il15l_csf2rb
14	MN	L->R	Neu 1	IL15_IL2RB	il15l_il21r.1
14	MN	L->R	Neu 1	LAMA2_ITGA1	CABZ01092781.1_itga1
14	MN	L->R	Neu 1	LAMA2_ITGB1	CABZ01092781.1_itgb1b
14	MN	L->R	Neu 1	LAMA2_RPSA	CABZ01092781.1_rpsa
14	MN	L->R	Neu 1	LIN7C_ABCA1	lin7c_abca1a
14	MN	L->R	Neu 1	LIN7C_ABCA1	lin7c_abca1b
14	MN	L->R	Neu 1	LMAN1_MCFD2	lman1_mcfd2
14	MN	L->R	Neu 1	MFGE8_ITGAV	mfge8a_itgav
14	MN	L->R	Neu 1	MFGE8_ITGAV	mfge8b_itgav
14	MN	L->R	Neu 1	NAMPT_INSR	nampta_insra
14	MN	L->R	Neu 1	SPINT1_ST14	spint1a_zmp:0000001114
14	MN	L->R	Neu 1	TIMP2_ITGB1	timp2b_itgb1b
15	MN	L->R	Neu 2	ACTR2_ADRB2	actr2a_adrb2a
15	MN	L->R	Neu 2	ADAM17_ITGB1	adam17a_CABZ01058721.1
15	MN	L->R	Neu 2	ADAM9_ITGB1	adam9_CABZ01058721.1
15	MN	L->R	Neu 2	ADM_ADRB2	adma_adrb2a
15	MN	L->R	Neu 2	ARPC5_ADRB2	arpc5a_adrb2a
15	MN	L->R	Neu 2	ARPC5_ADRB2	arpc5b_adrb2a
15	MN	L->R	Neu 2	CALR_ITGAV	calr_itgav
15	MN	L->R	Neu 2	CSF3_CSF1R	csf3a_csf1ra
15	MN	L->R	Neu 2	CSF3_CSF1R	csf3b_csf1ra
15	MN	L->R	Neu 2	F13A1_ITGB1	f13a1b_CABZ01058721.1
15	MN	L->R	Neu 2	F13A1_ITGB1	f13a1a.1_CABZ01058721.1
15	MN	L->R	Neu 2	FN1_C5AR1	fn1a_CABZ01041494.1
15	MN	L->R	Neu 2	FN1_ITGA4	fn1a_itga4
15	MN	L->R	Neu 2	FN1_ITGA5	fn1a_itga5
15	MN	L->R	Neu 2	FN1_ITGAV	fn1a_itgav
15	MN	L->R	Neu 2	FN1_ITGB1	fn1a_CABZ01058721.1
15	MN	L->R	Neu 2	FN1_ITGB1	fn1a_itgb1b
15	MN	L->R	Neu 2	HSPA8_ADRB2	hspa8_adrb2a
15	MN	L->R	Neu 2	IGF2_IGF2R	igf2b_igf2r
15	MN	L->R	Neu 2	IL15_IL15RA	il15_il15ra
15	MN	L->R	Neu 2	IL15_IL2RB	il15_csf2rb
15	MN	L->R	Neu 2	IL15_IL2RB	il15_il21r.1
15	MN	L->R	Neu 2	IL15_IL15RA	il15l_il15ra
15	MN	L->R	Neu 2	IL15_IL2RB	il15l_csf2rb
15	MN	L->R	Neu 2	IL15_IL2RB	il15l_il21r.1
15	MN	L->R	Neu 2	IL1B_ADRB2	il1b_adrb2a
15	MN	L->R	Neu 2	IL1B_IL1R1	il1b_zmp:0000000936
15	MN	L->R	Neu 2	IRAK4_TLR6	irak4_tlr1
15	MN	L->R	Neu 2	LAMA2_ITGB1	CABZ01092781.1_CABZ01058721.1
15	MN	L->R	Neu 2	LAMA2_ITGB1	CABZ01092781.1_itgb1b
15	MN	L->R	Neu 2	LAMA2_RPSA	CABZ01092781.1_rpsa
15	MN	L->R	Neu 2	LIN7C_ABCA1	lin7c_abca1a
15	MN	L->R	Neu 2	LIN7C_ABCA1	lin7c_abca1b
15	MN	L->R	Neu 2	MFGE8_ITGAV	mfge8a_itgav
15	MN	L->R	Neu 2	MFGE8_ITGAV	mfge8b_itgav
15	MN	L->R	Neu 2	NAMPT_INSR	nampta_insra
15	MN	L->R	Neu 2	TIMP2_ITGB1	timp2b_CABZ01058721.1
15	MN	L->R	Neu 2	UBA52_TGFBR2	uba52_tgfbr2a
16	Mac 8	L->R	Neu 1	ADAM17_IL6R	adam17a_il6r
16	Mac 8	L->R	Neu 1	ADAM17_ITGA5	adam17a_itga5
16	Mac 8	L->R	Neu 1	ADAM17_ITGB1	adam17a_itgb1b
16	Mac 8	L->R	Neu 1	ADAM9_ITGB1	adam9_itgb1b
16	Mac 8	L->R	Neu 1	AGTRAP_RACK1	agtrap_rack1
16	Mac 8	L->R	Neu 1	APOE_ABCA1	apoeb_abca1a
16	Mac 8	L->R	Neu 1	APOE_ABCA1	apoeb_abca1b
16	Mac 8	L->R	Neu 1	APP_AGER	appa_si:ch211-79k12.1
16	Mac 8	L->R	Neu 1	APP_APLP2	appa_aplp2
16	Mac 8	L->R	Neu 1	APP_CD74	appa_cd74a
16	Mac 8	L->R	Neu 1	APP_CD74	appa_cd74b
16	Mac 8	L->R	Neu 1	APP_LRP10	appa_lrp10
16	Mac 8	L->R	Neu 1	APP_NOTCH2	appa_notch2
16	Mac 8	L->R	Neu 1	APP_PTGER2	appa_ptger2a
16	Mac 8	L->R	Neu 1	APP_RPSA	appa_rpsa
16	Mac 8	L->R	Neu 1	ARF6_SMAP1	arf6b_smap1
16	Mac 8	L->R	Neu 1	BMP10_ACVR2A	bmp10l_acvr2aa
16	Mac 8	L->R	Neu 1	CALR_ITGAV	calr_itgav
16	Mac 8	L->R	Neu 1	CNTF_IL6R	m17_il6r
16	Mac 8	L->R	Neu 1	CSF3_CSF3R	csf3a_csf3r
16	Mac 8	L->R	Neu 1	CSF3_CSF3R	csf3b_csf3r
16	Mac 8	L->R	Neu 1	CXCL9_CXCR3	BX323596.1_cxcr3.3
16	Mac 8	L->R	Neu 1	F13A1_ITGB1	f13a1b_itgb1b
16	Mac 8	L->R	Neu 1	F13A1_ITGA4	f13a1a.1_itga4
16	Mac 8	L->R	Neu 1	F13A1_ITGB1	f13a1a.1_itgb1b
16	Mac 8	L->R	Neu 1	FN1_C5AR1	fn1a_CABZ01041494.1
16	Mac 8	L->R	Neu 1	FN1_ITGA4	fn1a_itga4
16	Mac 8	L->R	Neu 1	FN1_ITGA5	fn1a_itga5
16	Mac 8	L->R	Neu 1	FN1_ITGAV	fn1a_itgav
16	Mac 8	L->R	Neu 1	FN1_ITGB1	fn1a_itgb1b
16	Mac 8	L->R	Neu 1	GNAI2_ADCY7	gnai2b_adcy7
16	Mac 8	L->R	Neu 1	GNAI2_C5AR1	gnai2b_CABZ01041494.1
16	Mac 8	L->R	Neu 1	GNAI2_CXCR3	gnai2b_cxcr3.3
16	Mac 8	L->R	Neu 1	GNAI2_S1PR4	gnai2b_s1pr4
16	Mac 8	L->R	Neu 1	HBEGF_CD82	hbegfb_cd82a
16	Mac 8	L->R	Neu 1	HBEGF_CD82	hbegfb_cd82b
16	Mac 8	L->R	Neu 1	HGF_ITGB1	hgfb_itgb1b
16	Mac 8	L->R	Neu 1	HGF_ST14	hgfb_zmp:0000001114
16	Mac 8	L->R	Neu 1	HRAS_INSR	hrasb_insra
16	Mac 8	L->R	Neu 1	IGF2_IGF2R	igf2b_igf2r
16	Mac 8	L->R	Neu 1	INHBA_ACVR2A	inhbaa_acvr2aa
16	Mac 8	L->R	Neu 1	INHBA_SMAD3	inhbaa_smad3a
16	Mac 8	L->R	Neu 1	LAMA2_ITGA1	CABZ01092781.1_itga1
16	Mac 8	L->R	Neu 1	LAMA2_ITGB1	CABZ01092781.1_itgb1b
16	Mac 8	L->R	Neu 1	LAMA2_RPSA	CABZ01092781.1_rpsa
16	Mac 8	L->R	Neu 1	LAMB1_ITGA1	lamb1b_itga1
16	Mac 8	L->R	Neu 1	LAMB1_ITGAV	lamb1b_itgav
16	Mac 8	L->R	Neu 1	LAMB1_ITGB1	lamb1b_itgb1b
16	Mac 8	L->R	Neu 1	LRPAP1_SORT1	lrpap1_sort1b
16	Mac 8	L->R	Neu 1	MFGE8_ITGAV	mfge8a_itgav
16	Mac 8	L->R	Neu 1	NAMPT_INSR	nampta_insra
16	Mac 8	L->R	Neu 1	NUCB2_ERAP1	nucb2a_erap1b
16	Mac 8	L->R	Neu 1	NUCB2_ERAP1	nucb2b_erap1b
16	Mac 8	L->R	Neu 1	PDGFB_ITGAV	pdgfba_itgav
16	Mac 8	L->R	Neu 1	S100A1_AGER	s100a1_si:ch211-79k12.1
16	Mac 8	L->R	Neu 1	SORBS1_ITGA1	sorbs1_itga1
16	Mac 8	L->R	Neu 1	TIMP2_ITGB1	timp2b_itgb1b
16	Mac 8	L->R	Neu 1	VEGFA_ITGB1	vegfab_itgb1b
17	Mac 8	L->R	Neu 2	ACTR2_ADRB2	actr2a_adrb2a
17	Mac 8	L->R	Neu 2	ACTR2_ADRB2	actr2b_adrb2a
17	Mac 8	L->R	Neu 2	ADAM17_IL6R	adam17a_il6r
17	Mac 8	L->R	Neu 2	ADAM17_ITGA5	adam17a_itga5
17	Mac 8	L->R	Neu 2	ADAM17_ITGB1	adam17a_CABZ01058721.1
17	Mac 8	L->R	Neu 2	ADAM17_ITGB1	adam17a_itgb1b
17	Mac 8	L->R	Neu 2	ADAM9_ITGB1	adam9_CABZ01058721.1
17	Mac 8	L->R	Neu 2	AGTRAP_RACK1	agtrap_rack1
17	Mac 8	L->R	Neu 2	APOE_ABCA1	apoeb_abca1a
17	Mac 8	L->R	Neu 2	APOE_ABCA1	apoeb_abca1b
17	Mac 8	L->R	Neu 2	APP_AGER	appa_si:ch211-79k12.1
17	Mac 8	L->R	Neu 2	APP_APLP2	appa_aplp2
17	Mac 8	L->R	Neu 2	APP_CD74	appa_cd74a
17	Mac 8	L->R	Neu 2	APP_CD74	appa_cd74b
17	Mac 8	L->R	Neu 2	APP_LRP10	appa_lrp10
17	Mac 8	L->R	Neu 2	APP_NOTCH2	appa_notch2
17	Mac 8	L->R	Neu 2	APP_RPSA	appa_rpsa
17	Mac 8	L->R	Neu 2	ARF6_SMAP1	arf6b_smap1
17	Mac 8	L->R	Neu 2	ARPC5_ADRB2	arpc5a_adrb2a
17	Mac 8	L->R	Neu 2	ARPC5_ADRB2	arpc5b_adrb2a
17	Mac 8	L->R	Neu 2	BMP10_ACVR2A	bmp10l_acvr2aa
17	Mac 8	L->R	Neu 2	CALR_ITGAV	calr_itgav
17	Mac 8	L->R	Neu 2	CNTF_IL6R	m17_il6r
17	Mac 8	L->R	Neu 2	CSF3_CSF1R	csf3a_csf1ra
17	Mac 8	L->R	Neu 2	CSF3_CSF3R	csf3a_csf3r
17	Mac 8	L->R	Neu 2	CSF3_CSF1R	csf3b_csf1ra
17	Mac 8	L->R	Neu 2	CSF3_CSF3R	csf3b_csf3r
17	Mac 8	L->R	Neu 2	CXCL9_CXCR3	BX323596.1_cxcr3.3
17	Mac 8	L->R	Neu 2	F13A1_ITGB1	f13a1b_CABZ01058721.1
17	Mac 8	L->R	Neu 2	F13A1_ITGA4	f13a1a.1_itga4
17	Mac 8	L->R	Neu 2	F13A1_ITGB1	f13a1a.1_CABZ01058721.1
17	Mac 8	L->R	Neu 2	F13A1_ITGB1	f13a1a.1_itgb1b
17	Mac 8	L->R	Neu 2	FN1_C5AR1	fn1a_CABZ01041494.1
17	Mac 8	L->R	Neu 2	FN1_ITGA4	fn1a_itga4
17	Mac 8	L->R	Neu 2	FN1_ITGA5	fn1a_itga5
17	Mac 8	L->R	Neu 2	FN1_ITGAV	fn1a_itgav
17	Mac 8	L->R	Neu 2	FN1_ITGB1	fn1a_CABZ01058721.1
17	Mac 8	L->R	Neu 2	FN1_ITGB1	fn1a_itgb1b
17	Mac 8	L->R	Neu 2	GNAI2_ADCY7	gnai2b_adcy7
17	Mac 8	L->R	Neu 2	GNAI2_C5AR1	gnai2b_CABZ01041494.1
17	Mac 8	L->R	Neu 2	GNAI2_CXCR3	gnai2b_cxcr3.3
17	Mac 8	L->R	Neu 2	GNAI2_S1PR4	gnai2b_s1pr4
17	Mac 8	L->R	Neu 2	HBEGF_CD82	hbegfb_cd82a
17	Mac 8	L->R	Neu 2	HBEGF_CD82	hbegfb_cd82b
17	Mac 8	L->R	Neu 2	HGF_ITGB1	hgfb_CABZ01058721.1
17	Mac 8	L->R	Neu 2	HGF_ITGB1	hgfb_itgb1b
17	Mac 8	L->R	Neu 2	HRAS_INSR	hrasb_insra
17	Mac 8	L->R	Neu 2	HSPA8_ADRB2	hspa8_adrb2a
17	Mac 8	L->R	Neu 2	IGF2_IGF2R	igf2b_igf2r
17	Mac 8	L->R	Neu 2	IL1B_ADRB2	il1b_adrb2a
17	Mac 8	L->R	Neu 2	IL1B_IL1R1	il1b_zmp:0000000936
17	Mac 8	L->R	Neu 2	INHBA_ACVR2A	inhbaa_acvr2aa
17	Mac 8	L->R	Neu 2	INHBA_SMAD3	inhbaa_smad3a
17	Mac 8	L->R	Neu 2	IRAK4_TLR6	irak4_tlr1
17	Mac 8	L->R	Neu 2	LAMA2_ITGB1	CABZ01092781.1_CABZ01058721.1
17	Mac 8	L->R	Neu 2	LAMA2_ITGB1	CABZ01092781.1_itgb1b
17	Mac 8	L->R	Neu 2	LAMA2_RPSA	CABZ01092781.1_rpsa
17	Mac 8	L->R	Neu 2	LAMB1_ITGAV	lamb1b_itgav
17	Mac 8	L->R	Neu 2	LAMB1_ITGB1	lamb1b_CABZ01058721.1
17	Mac 8	L->R	Neu 2	LAMB1_ITGB1	lamb1b_itgb1b
17	Mac 8	L->R	Neu 2	LRPAP1_SORT1	lrpap1_sort1b
17	Mac 8	L->R	Neu 2	MFGE8_ITGAV	mfge8a_itgav
17	Mac 8	L->R	Neu 2	NAMPT_INSR	nampta_insra
17	Mac 8	L->R	Neu 2	NUCB2_ERAP1	nucb2a_erap1b
17	Mac 8	L->R	Neu 2	NUCB2_ERAP1	nucb2b_erap1b
17	Mac 8	L->R	Neu 2	PDGFB_ITGAV	pdgfba_itgav
17	Mac 8	L->R	Neu 2	S100A1_AGER	s100a1_si:ch211-79k12.1
17	Mac 8	L->R	Neu 2	TIMP2_ITGB1	timp2b_CABZ01058721.1
17	Mac 8	L->R	Neu 2	UBA52_TGFBR2	uba52_tgfbr2a
17	Mac 8	L->R	Neu 2	VEGFA_ITGB1	vegfab_CABZ01058721.1
18	Mac 9	L->R	Neu 1	ADAM17_ITGB1	adam17a_itgb1b
18	Mac 9	L->R	Neu 1	APP_AGER	appa_si:ch211-79k12.1
18	Mac 9	L->R	Neu 1	APP_APLP2	appa_aplp2
18	Mac 9	L->R	Neu 1	APP_CD74	appa_cd74a
18	Mac 9	L->R	Neu 1	APP_CD74	appa_cd74b
18	Mac 9	L->R	Neu 1	APP_LRP10	appa_lrp10
18	Mac 9	L->R	Neu 1	APP_NOTCH2	appa_notch2
18	Mac 9	L->R	Neu 1	APP_PTGER2	appa_ptger2a
18	Mac 9	L->R	Neu 1	APP_RPSA	appa_rpsa
18	Mac 9	L->R	Neu 1	F13A1_ITGB1	f13a1b_itgb1b
18	Mac 9	L->R	Neu 1	F13A1_ITGA4	f13a1a.1_itga4
18	Mac 9	L->R	Neu 1	F13A1_ITGB1	f13a1a.1_itgb1b
18	Mac 9	L->R	Neu 1	HRAS_INSR	hrasb_insra
18	Mac 9	L->R	Neu 1	HRAS_INSR	hrasa_insra
18	Mac 9	L->R	Neu 1	ICAM3_ITGB2	icam3_itgb2
18	Mac 9	L->R	Neu 1	IL15_IL15RA	il15l_il15ra
18	Mac 9	L->R	Neu 1	IL15_IL2RB	il15l_csf2rb
18	Mac 9	L->R	Neu 1	IL15_IL2RB	il15l_il21r.1
18	Mac 9	L->R	Neu 1	LMAN1_MCFD2	lman1_mcfd2
18	Mac 9	L->R	Neu 1	SPINT1_ST14	spint1a_zmp:0000001114
19	Mac 9	L->R	Neu 2	ACTR2_ADRB2	actr2a_adrb2a
19	Mac 9	L->R	Neu 2	ACTR2_ADRB2	actr2b_adrb2a
19	Mac 9	L->R	Neu 2	ADAM17_ITGB1	adam17a_CABZ01058721.1
19	Mac 9	L->R	Neu 2	ADM_ADRB2	adma_adrb2a
19	Mac 9	L->R	Neu 2	APP_AGER	appa_si:ch211-79k12.1
19	Mac 9	L->R	Neu 2	APP_APLP2	appa_aplp2
19	Mac 9	L->R	Neu 2	APP_CD74	appa_cd74a
19	Mac 9	L->R	Neu 2	APP_CD74	appa_cd74b
19	Mac 9	L->R	Neu 2	APP_LRP10	appa_lrp10
19	Mac 9	L->R	Neu 2	APP_NOTCH2	appa_notch2
19	Mac 9	L->R	Neu 2	APP_RPSA	appa_rpsa
19	Mac 9	L->R	Neu 2	ARPC5_ADRB2	arpc5a_adrb2a
19	Mac 9	L->R	Neu 2	ARPC5_ADRB2	arpc5b_adrb2a
19	Mac 9	L->R	Neu 2	F13A1_ITGB1	f13a1b_CABZ01058721.1
19	Mac 9	L->R	Neu 2	F13A1_ITGA4	f13a1a.1_itga4
19	Mac 9	L->R	Neu 2	F13A1_ITGB1	f13a1a.1_CABZ01058721.1
19	Mac 9	L->R	Neu 2	F13A1_ITGB1	f13a1a.1_itgb1b
19	Mac 9	L->R	Neu 2	HRAS_INSR	hrasb_insra
19	Mac 9	L->R	Neu 2	HRAS_INSR	hrasa_insra
19	Mac 9	L->R	Neu 2	HSPA8_ADRB2	hspa8_adrb2a
19	Mac 9	L->R	Neu 2	ICAM3_ITGB2	icam3_itgb2
19	Mac 9	L->R	Neu 2	IL15_IL15RA	il15l_il15ra
19	Mac 9	L->R	Neu 2	IL15_IL2RB	il15l_csf2rb
19	Mac 9	L->R	Neu 2	IL15_IL2RB	il15l_il21r.1
19	Mac 9	L->R	Neu 2	IL1B_ADRB2	il1b_adrb2a
19	Mac 9	L->R	Neu 2	IL1B_IL1R1	il1b_zmp:0000000936
19	Mac 9	L->R	Neu 2	IRAK4_TLR6	irak4_tlr1
19	Mac 9	L->R	Neu 2	UBA52_TGFBR2	uba52_tgfbr2a

## Sheet: CL7d-specific
7dpci_Mac-ligand to Neu-receptor
Cluster pair ID	CT1	pair type	CT2	human L-R pair	L-R pair
0	Mac 1	L->R	Neu 1	ACTR2_ADRB2	actr2a_adrb2a
0	Mac 1	L->R	Neu 1	ADAM10_TSPAN15	adam10a_tspan15
0	Mac 1	L->R	Neu 1	ADM_ADRB2	adma_adrb2a
0	Mac 1	L->R	Neu 1	ADM_GPR84	adma_gpr84
0	Mac 1	L->R	Neu 1	APOE_SORL1	apoeb_sorl1
0	Mac 1	L->R	Neu 1	APP_SORL1	appa_sorl1
0	Mac 1	L->R	Neu 1	APP_TSPAN15	appa_tspan15
0	Mac 1	L->R	Neu 1	APP_SORL1	appb_sorl1
0	Mac 1	L->R	Neu 1	APP_TSPAN15	appb_tspan15
0	Mac 1	L->R	Neu 1	ARPC5_ADRB2	arpc5a_adrb2a
0	Mac 1	L->R	Neu 1	ARPC5_ADRB2	arpc5b_adrb2a
0	Mac 1	L->R	Neu 1	CSF3_CSF3R	csf3a_csf3r
0	Mac 1	L->R	Neu 1	HSPA8_ADRB2	hspa8_adrb2a
0	Mac 1	L->R	Neu 1	IL1B_ADRB2	il1b_adrb2a
0	Mac 1	L->R	Neu 1	KITLG_EPOR	kitlga_il4r.1
0	Mac 1	L->R	Neu 1	LRPAP1_SORL1	lrpap1_sorl1
0	Mac 1	L->R	Neu 1	LTF_TFRC	tfa_tfr1b
0	Mac 1	L->R	Neu 1	VEGFA_ITGAV	vegfaa_itgav
1	Mac 1	L->R	Neu 2	ADAM10_TSPAN15	adam10a_tspan15
1	Mac 1	L->R	Neu 2	ADM_GPR84	adma_gpr84
1	Mac 1	L->R	Neu 2	APP_PTGER2	appa_ptger2b
1	Mac 1	L->R	Neu 2	APP_TSPAN15	appa_tspan15
1	Mac 1	L->R	Neu 2	APP_PTGER2	appb_ptger2b
1	Mac 1	L->R	Neu 2	APP_TSPAN15	appb_tspan15
1	Mac 1	L->R	Neu 2	CSF3_CSF3R	csf3a_csf3r
1	Mac 1	L->R	Neu 2	GRN_TNFRSF1B	grn1_tnfrsf1b
1	Mac 1	L->R	Neu 2	GRN_TNFRSF1B	grn2_tnfrsf1b
1	Mac 1	L->R	Neu 2	IL16_CD4	il16_dicp2.1
1	Mac 1	L->R	Neu 2	KITLG_EPOR	kitlga_il4r.1
1	Mac 1	L->R	Neu 2	LTF_TFRC	tfa_tfr1b
1	Mac 1	L->R	Neu 2	TNF_TNFRSF1B	tnfa_tnfrsf1b
1	Mac 1	L->R	Neu 2	TNF_TNFRSF1B	tnfb_tnfrsf1b
1	Mac 1	L->R	Neu 2	VEGFA_ITGAV	vegfaa_itgav
1	Mac 1	L->R	Neu 2	VEGFA_ITGB1	vegfaa_itgb1b
2	Mac 2	L->R	Neu 1	ACTR2_ADRB2	actr2a_adrb2a
2	Mac 2	L->R	Neu 1	ADAM10_TSPAN15	adam10a_tspan15
2	Mac 2	L->R	Neu 1	APOE_SORL1	apoeb_sorl1
2	Mac 2	L->R	Neu 1	APP_SORL1	appa_sorl1
2	Mac 2	L->R	Neu 1	APP_TSPAN15	appa_tspan15
2	Mac 2	L->R	Neu 1	ARPC5_ADRB2	arpc5a_adrb2a
2	Mac 2	L->R	Neu 1	ARPC5_ADRB2	arpc5b_adrb2a
2	Mac 2	L->R	Neu 1	C3_CD81	c3a.4_cd81a
2	Mac 2	L->R	Neu 1	C3_ITGAX	c3a.4_si:dkey-32n7.4
2	Mac 2	L->R	Neu 1	C3_ITGAX	c3a.4_itgam
2	Mac 2	L->R	Neu 1	C3_ITGB2	c3a.4_itgb2
2	Mac 2	L->R	Neu 1	CCN2_ITGA5	ccn2a_itga5
2	Mac 2	L->R	Neu 1	CCN2_ITGB2	ccn2a_itgb2
2	Mac 2	L->R	Neu 1	CNTF_IL6R	m17_il6r
2	Mac 2	L->R	Neu 1	CSF3_CSF3R	csf3a_csf3r
2	Mac 2	L->R	Neu 1	HSPA8_ADRB2	hspa8_adrb2a
2	Mac 2	L->R	Neu 1	IL1B_ADRB2	il1b_adrb2a
2	Mac 2	L->R	Neu 1	KITLG_EPOR	kitlga_il4r.1
2	Mac 2	L->R	Neu 1	LIN7C_ABCA1	lin7c_abca1a
2	Mac 2	L->R	Neu 1	LIN7C_ABCA1	lin7c_abca1b
2	Mac 2	L->R	Neu 1	LRPAP1_SORL1	lrpap1_sorl1
2	Mac 2	L->R	Neu 1	NAMPT_INSR	nampta_insra
2	Mac 2	L->R	Neu 1	NUCB2_ERAP1	nucb2b_erap1b
2	Mac 2	L->R	Neu 1	TGFB1_CXCR4	tgfb1b_cxcr4a
2	Mac 2	L->R	Neu 1	TGFB1_CXCR4	tgfb1b_cxcr4b
2	Mac 2	L->R	Neu 1	TGFB1_ITGAV	tgfb1b_itgav
2	Mac 2	L->R	Neu 1	TGFB1_SMAD3	tgfb1b_smad3a
2	Mac 2	L->R	Neu 1	VEGFA_ITGAV	vegfaa_itgav
3	Mac 2	L->R	Neu 2	ADAM10_TSPAN15	adam10a_tspan15
3	Mac 2	L->R	Neu 2	APP_PTGER2	appa_ptger2b
3	Mac 2	L->R	Neu 2	APP_TSPAN15	appa_tspan15
3	Mac 2	L->R	Neu 2	C3_CD81	c3a.4_cd81a
3	Mac 2	L->R	Neu 2	C3_ITGAX	c3a.4_si:dkey-32n7.4
3	Mac 2	L->R	Neu 2	C3_ITGAX	c3a.4_itgam
3	Mac 2	L->R	Neu 2	C3_ITGB2	c3a.4_itgb2
3	Mac 2	L->R	Neu 2	CCN2_ITGA5	ccn2a_itga5
3	Mac 2	L->R	Neu 2	CCN2_ITGB2	ccn2a_itgb2
3	Mac 2	L->R	Neu 2	CNTF_IL6R	m17_il6r
3	Mac 2	L->R	Neu 2	CSF3_CSF3R	csf3a_csf3r
3	Mac 2	L->R	Neu 2	GRN_TNFRSF1B	grn1_tnfrsf1b
3	Mac 2	L->R	Neu 2	GRN_TNFRSF1B	grn2_tnfrsf1b
3	Mac 2	L->R	Neu 2	HGF_ITGB1	hgfb_itgb1b
3	Mac 2	L->R	Neu 2	HSPG2_ITGB1	hspg2_itgb1b
3	Mac 2	L->R	Neu 2	IL16_CD4	il16_dicp2.1
3	Mac 2	L->R	Neu 2	KITLG_EPOR	kitlga_il4r.1
3	Mac 2	L->R	Neu 2	LIN7C_ABCA1	lin7c_abca1a
3	Mac 2	L->R	Neu 2	LIN7C_ABCA1	lin7c_abca1b
3	Mac 2	L->R	Neu 2	NAMPT_INSR	nampta_insra
3	Mac 2	L->R	Neu 2	NUCB2_ERAP1	nucb2b_erap1b
3	Mac 2	L->R	Neu 2	TGFB1_CXCR4	tgfb1b_cxcr4a
3	Mac 2	L->R	Neu 2	TGFB1_CXCR4	tgfb1b_cxcr4b
3	Mac 2	L->R	Neu 2	TGFB1_ITGAV	tgfb1b_itgav
3	Mac 2	L->R	Neu 2	TGFB1_ITGB1	tgfb1b_itgb1b
3	Mac 2	L->R	Neu 2	TGFB1_SMAD3	tgfb1b_smad3a
3	Mac 2	L->R	Neu 2	TNF_TNFRSF1B	tnfa_tnfrsf1b
3	Mac 2	L->R	Neu 2	TNF_TNFRSF1B	tnfb_tnfrsf1b
3	Mac 2	L->R	Neu 2	VEGFA_ITGAV	vegfaa_itgav
3	Mac 2	L->R	Neu 2	VEGFA_ITGB1	vegfaa_itgb1b
4	Mac 3	L->R	Neu 1	ACTR2_ADRB2	actr2a_adrb2a
4	Mac 3	L->R	Neu 1	ADAM10_TSPAN15	adam10a_tspan15
4	Mac 3	L->R	Neu 1	ADM_ADRB2	adma_adrb2a
4	Mac 3	L->R	Neu 1	ADM_GPR84	adma_gpr84
4	Mac 3	L->R	Neu 1	ADM_ADRB2	admb_adrb2a
4	Mac 3	L->R	Neu 1	ADM_GPR84	admb_gpr84
4	Mac 3	L->R	Neu 1	APOE_SORL1	apoeb_sorl1
4	Mac 3	L->R	Neu 1	APP_SORL1	appa_sorl1
4	Mac 3	L->R	Neu 1	APP_TSPAN15	appa_tspan15
4	Mac 3	L->R	Neu 1	APP_SORL1	appb_sorl1
4	Mac 3	L->R	Neu 1	APP_TSPAN15	appb_tspan15
4	Mac 3	L->R	Neu 1	ARPC5_ADRB2	arpc5a_adrb2a
4	Mac 3	L->R	Neu 1	ARPC5_ADRB2	arpc5b_adrb2a
4	Mac 3	L->R	Neu 1	CALM2_ABCA1	calm3a_abca1a
4	Mac 3	L->R	Neu 1	CALM2_ABCA1	calm3a_abca1b
4	Mac 3	L->R	Neu 1	CALM2_INSR	calm3a_insra
4	Mac 3	L->R	Neu 1	CALM2_KCNQ5	calm3a_kcnq5b
4	Mac 3	L->R	Neu 1	FN1_C5AR1	fn1b_CABZ01041494.1
4	Mac 3	L->R	Neu 1	FN1_ITGA4	fn1b_itga4
4	Mac 3	L->R	Neu 1	FN1_ITGA5	fn1b_itga5
4	Mac 3	L->R	Neu 1	FN1_ITGAV	fn1b_itgav
4	Mac 3	L->R	Neu 1	HSPA8_ADRB2	hspa8_adrb2a
4	Mac 3	L->R	Neu 1	IL1B_ADRB2	il1b_adrb2a
4	Mac 3	L->R	Neu 1	INHBA_ACVR2A	inhbaa_acvr2aa
4	Mac 3	L->R	Neu 1	INHBA_SMAD3	inhbaa_smad3a
4	Mac 3	L->R	Neu 1	KITLG_EPOR	kitlga_il4r.1
4	Mac 3	L->R	Neu 1	LIN7C_ABCA1	lin7c_abca1a
4	Mac 3	L->R	Neu 1	LIN7C_ABCA1	lin7c_abca1b
4	Mac 3	L->R	Neu 1	LRPAP1_SORL1	lrpap1_sorl1
4	Mac 3	L->R	Neu 1	MMP9_ITGB2	mmp9_itgb2
4	Mac 3	L->R	Neu 1	NUCB2_ERAP1	nucb2b_erap1b
4	Mac 3	L->R	Neu 1	TGFB1_CXCR4	tgfb1a_cxcr4a
4	Mac 3	L->R	Neu 1	TGFB1_CXCR4	tgfb1a_cxcr4b
4	Mac 3	L->R	Neu 1	TGFB1_ITGAV	tgfb1a_itgav
4	Mac 3	L->R	Neu 1	TGFB1_SMAD3	tgfb1a_smad3a
5	Mac 3	L->R	Neu 2	ADAM10_TSPAN15	adam10a_tspan15
5	Mac 3	L->R	Neu 2	ADM_GPR84	adma_gpr84
5	Mac 3	L->R	Neu 2	ADM_GPR84	admb_gpr84
5	Mac 3	L->R	Neu 2	APP_PTGER2	appa_ptger2b
5	Mac 3	L->R	Neu 2	APP_TSPAN15	appa_tspan15
5	Mac 3	L->R	Neu 2	APP_PTGER2	appb_ptger2b
5	Mac 3	L->R	Neu 2	APP_TSPAN15	appb_tspan15
5	Mac 3	L->R	Neu 2	CALM2_ABCA1	calm3a_abca1a
5	Mac 3	L->R	Neu 2	CALM2_ABCA1	calm3a_abca1b
5	Mac 3	L->R	Neu 2	CALM2_INSR	calm3a_insra
5	Mac 3	L->R	Neu 2	CALM2_KCNQ5	calm3a_kcnq5b
5	Mac 3	L->R	Neu 2	FN1_C5AR1	fn1b_CABZ01041494.1
5	Mac 3	L->R	Neu 2	FN1_ITGA4	fn1b_itga4
5	Mac 3	L->R	Neu 2	FN1_ITGA5	fn1b_itga5
5	Mac 3	L->R	Neu 2	FN1_ITGAV	fn1b_itgav
5	Mac 3	L->R	Neu 2	FN1_ITGB1	fn1b_itgb1b
5	Mac 3	L->R	Neu 2	GRN_TNFRSF1B	grn1_tnfrsf1b
5	Mac 3	L->R	Neu 2	GRN_TNFRSF1B	grn2_tnfrsf1b
5	Mac 3	L->R	Neu 2	IL16_CD4	il16_dicp2.1
5	Mac 3	L->R	Neu 2	INHBA_ACVR2A	inhbaa_acvr2aa
5	Mac 3	L->R	Neu 2	INHBA_SMAD3	inhbaa_smad3a
5	Mac 3	L->R	Neu 2	KITLG_EPOR	kitlga_il4r.1
5	Mac 3	L->R	Neu 2	LIN7C_ABCA1	lin7c_abca1a
5	Mac 3	L->R	Neu 2	LIN7C_ABCA1	lin7c_abca1b
5	Mac 3	L->R	Neu 2	MMP9_ITGB2	mmp9_itgb2
5	Mac 3	L->R	Neu 2	NUCB2_ERAP1	nucb2b_erap1b
5	Mac 3	L->R	Neu 2	TGFB1_CXCR4	tgfb1a_cxcr4a
5	Mac 3	L->R	Neu 2	TGFB1_CXCR4	tgfb1a_cxcr4b
5	Mac 3	L->R	Neu 2	TGFB1_ITGAV	tgfb1a_itgav
5	Mac 3	L->R	Neu 2	TGFB1_ITGB1	tgfb1a_itgb1b
5	Mac 3	L->R	Neu 2	TGFB1_SMAD3	tgfb1a_smad3a
5	Mac 3	L->R	Neu 2	TIMP2_ITGB1	timp2a_itgb1b
5	Mac 3	L->R	Neu 2	TNF_TNFRSF1B	tnfa_tnfrsf1b
5	Mac 3	L->R	Neu 2	TNF_TNFRSF1B	tnfb_tnfrsf1b
6	Mac 4	L->R	Neu 1	ACTR2_ADRB2	actr2a_adrb2a
6	Mac 4	L->R	Neu 1	ADAM10_TSPAN15	adam10a_tspan15
6	Mac 4	L->R	Neu 1	ADM_ADRB2	adma_adrb2a
6	Mac 4	L->R	Neu 1	ADM_GPR84	adma_gpr84
6	Mac 4	L->R	Neu 1	APOE_SORL1	apoeb_sorl1
6	Mac 4	L->R	Neu 1	APP_SORL1	appa_sorl1
6	Mac 4	L->R	Neu 1	APP_TSPAN15	appa_tspan15
6	Mac 4	L->R	Neu 1	ARPC5_ADRB2	arpc5a_adrb2a
6	Mac 4	L->R	Neu 1	ARPC5_ADRB2	arpc5b_adrb2a
6	Mac 4	L->R	Neu 1	CALM2_ABCA1	calm3a_abca1a
6	Mac 4	L->R	Neu 1	CALM2_ABCA1	calm3a_abca1b
6	Mac 4	L->R	Neu 1	CALM2_INSR	calm3a_insra
6	Mac 4	L->R	Neu 1	CALM2_KCNQ5	calm3a_kcnq5b
6	Mac 4	L->R	Neu 1	FN1_C5AR1	fn1b_CABZ01041494.1
6	Mac 4	L->R	Neu 1	FN1_ITGA4	fn1b_itga4
6	Mac 4	L->R	Neu 1	FN1_ITGA5	fn1b_itga5
6	Mac 4	L->R	Neu 1	FN1_ITGAV	fn1b_itgav
6	Mac 4	L->R	Neu 1	HSPA8_ADRB2	hspa8_adrb2a
6	Mac 4	L->R	Neu 1	IL1B_ADRB2	il1b_adrb2a
6	Mac 4	L->R	Neu 1	LIN7C_ABCA1	lin7c_abca1a
6	Mac 4	L->R	Neu 1	LIN7C_ABCA1	lin7c_abca1b
6	Mac 4	L->R	Neu 1	LRPAP1_SORL1	lrpap1_sorl1
7	Mac 4	L->R	Neu 2	ADAM10_TSPAN15	adam10a_tspan15
7	Mac 4	L->R	Neu 2	ADM_GPR84	adma_gpr84
7	Mac 4	L->R	Neu 2	APP_PTGER2	appa_ptger2b
7	Mac 4	L->R	Neu 2	APP_TSPAN15	appa_tspan15
7	Mac 4	L->R	Neu 2	CALM2_ABCA1	calm3a_abca1a
7	Mac 4	L->R	Neu 2	CALM2_ABCA1	calm3a_abca1b
7	Mac 4	L->R	Neu 2	CALM2_INSR	calm3a_insra
7	Mac 4	L->R	Neu 2	CALM2_KCNQ5	calm3a_kcnq5b
7	Mac 4	L->R	Neu 2	FN1_C5AR1	fn1b_CABZ01041494.1
7	Mac 4	L->R	Neu 2	FN1_ITGA4	fn1b_itga4
7	Mac 4	L->R	Neu 2	FN1_ITGA5	fn1b_itga5
7	Mac 4	L->R	Neu 2	FN1_ITGAV	fn1b_itgav
7	Mac 4	L->R	Neu 2	FN1_ITGB1	fn1b_itgb1b
7	Mac 4	L->R	Neu 2	GRN_TNFRSF1B	grn1_tnfrsf1b
7	Mac 4	L->R	Neu 2	GRN_TNFRSF1B	grn2_tnfrsf1b
7	Mac 4	L->R	Neu 2	IL16_CD4	il16_dicp2.1
7	Mac 4	L->R	Neu 2	LIN7C_ABCA1	lin7c_abca1a
7	Mac 4	L->R	Neu 2	LIN7C_ABCA1	lin7c_abca1b
7	Mac 4	L->R	Neu 2	TNF_TNFRSF1B	tnfa_tnfrsf1b
7	Mac 4	L->R	Neu 2	TNF_TNFRSF1B	tnfb_tnfrsf1b
8	Mac 5	L->R	Neu 1	ACTR2_ADRB2	actr2a_adrb2a
8	Mac 5	L->R	Neu 1	ADAM10_TSPAN15	adam10a_tspan15
8	Mac 5	L->R	Neu 1	ADM_ADRB2	admb_adrb2a
8	Mac 5	L->R	Neu 1	ADM_GPR84	admb_gpr84
8	Mac 5	L->R	Neu 1	APOE_SORL1	apoeb_sorl1
8	Mac 5	L->R	Neu 1	APP_SORL1	appa_sorl1
8	Mac 5	L->R	Neu 1	APP_TSPAN15	appa_tspan15
8	Mac 5	L->R	Neu 1	ARPC5_ADRB2	arpc5a_adrb2a
8	Mac 5	L->R	Neu 1	ARPC5_ADRB2	arpc5b_adrb2a
8	Mac 5	L->R	Neu 1	HSPA8_ADRB2	hspa8_adrb2a
8	Mac 5	L->R	Neu 1	IFNG_IFNGR1	ifng1_ifngr1
8	Mac 5	L->R	Neu 1	IFNG_IFNGR1	ifng1_ifngr1l
8	Mac 5	L->R	Neu 1	IFNG_IFNGR1	ifng1_il10ra
8	Mac 5	L->R	Neu 1	IL1B_ADRB2	il1b_adrb2a
8	Mac 5	L->R	Neu 1	LRPAP1_SORL1	lrpap1_sorl1
9	Mac 5	L->R	Neu 2	ADAM10_TSPAN15	adam10a_tspan15
9	Mac 5	L->R	Neu 2	ADM_GPR84	admb_gpr84
9	Mac 5	L->R	Neu 2	APP_PTGER2	appa_ptger2b
9	Mac 5	L->R	Neu 2	APP_TSPAN15	appa_tspan15
9	Mac 5	L->R	Neu 2	GRN_TNFRSF1B	grn1_tnfrsf1b
9	Mac 5	L->R	Neu 2	GRN_TNFRSF1B	grn2_tnfrsf1b
9	Mac 5	L->R	Neu 2	IFNG_IFNGR1	ifng1_ifngr1
9	Mac 5	L->R	Neu 2	IFNG_IFNGR1	ifng1_ifngr1l
9	Mac 5	L->R	Neu 2	IFNG_IFNGR1	ifng1_il10ra
9	Mac 5	L->R	Neu 2	IL16_CD4	il16_dicp2.1
9	Mac 5	L->R	Neu 2	TNF_TNFRSF1B	tnfb_tnfrsf1b
10	Mac 6	L->R	Neu 1	ACTR2_ADRB2	actr2a_adrb2a
10	Mac 6	L->R	Neu 1	ADAM10_TSPAN15	adam10a_tspan15
10	Mac 6	L->R	Neu 1	ADM_ADRB2	adma_adrb2a
10	Mac 6	L->R	Neu 1	ADM_GPR84	adma_gpr84
10	Mac 6	L->R	Neu 1	APOE_SORL1	apoeb_sorl1
10	Mac 6	L->R	Neu 1	APP_SORL1	appa_sorl1
10	Mac 6	L->R	Neu 1	APP_TSPAN15	appa_tspan15
10	Mac 6	L->R	Neu 1	ARPC5_ADRB2	arpc5a_adrb2a
10	Mac 6	L->R	Neu 1	ARPC5_ADRB2	arpc5b_adrb2a
10	Mac 6	L->R	Neu 1	CALM2_ABCA1	calm3a_abca1a
10	Mac 6	L->R	Neu 1	CALM2_ABCA1	calm3a_abca1b
10	Mac 6	L->R	Neu 1	CALM2_INSR	calm3a_insra
10	Mac 6	L->R	Neu 1	CALM2_KCNQ5	calm3a_kcnq5b
10	Mac 6	L->R	Neu 1	HSPA8_ADRB2	hspa8_adrb2a
10	Mac 6	L->R	Neu 1	IL1B_ADRB2	il1b_adrb2a
10	Mac 6	L->R	Neu 1	LRPAP1_SORL1	lrpap1_sorl1
10	Mac 6	L->R	Neu 1	PTGS2_ALOX5	ptgs2a_alox5a
10	Mac 6	L->R	Neu 1	TNF_TNFRSF1B	tnfa_tnfrsf1b
10	Mac 6	L->R	Neu 1	TNF_TRADD	tnfa_tradd
10	Mac 6	L->R	Neu 1	VEGFA_ITGAV	vegfab_itgav
10	Mac 6	L->R	Neu 1	VEGFA_ITGAV	vegfaa_itgav
11	Mac 6	L->R	Neu 2	ADAM10_TSPAN15	adam10a_tspan15
11	Mac 6	L->R	Neu 2	ADM_GPR84	adma_gpr84
11	Mac 6	L->R	Neu 2	APP_PTGER2	appa_ptger2b
11	Mac 6	L->R	Neu 2	APP_TSPAN15	appa_tspan15
11	Mac 6	L->R	Neu 2	CALM2_ABCA1	calm3a_abca1a
11	Mac 6	L->R	Neu 2	CALM2_ABCA1	calm3a_abca1b
11	Mac 6	L->R	Neu 2	CALM2_INSR	calm3a_insra
11	Mac 6	L->R	Neu 2	CALM2_KCNQ5	calm3a_kcnq5b
11	Mac 6	L->R	Neu 2	GRN_TNFRSF1B	grn1_tnfrsf1b
11	Mac 6	L->R	Neu 2	GRN_TNFRSF1B	grn2_tnfrsf1b
11	Mac 6	L->R	Neu 2	IL16_CD4	il16_dicp2.1
11	Mac 6	L->R	Neu 2	PTGS2_ALOX5	ptgs2a_alox5a
11	Mac 6	L->R	Neu 2	TNF_TNFRSF1A	tnfa_fas
11	Mac 6	L->R	Neu 2	TNF_TNFRSF1B	tnfa_tnfrsf1b
11	Mac 6	L->R	Neu 2	TNF_TRADD	tnfa_tradd
11	Mac 6	L->R	Neu 2	TNF_TNFRSF1B	tnfb_tnfrsf1b
11	Mac 6	L->R	Neu 2	VEGFA_ITGAV	vegfab_itgav
11	Mac 6	L->R	Neu 2	VEGFA_ITGB1	vegfab_itgb1b
11	Mac 6	L->R	Neu 2	VEGFA_ITGAV	vegfaa_itgav
11	Mac 6	L->R	Neu 2	VEGFA_ITGB1	vegfaa_itgb1b
12	Mac 7	L->R	Neu 1	ACTR2_ADRB2	actr2a_adrb2a
12	Mac 7	L->R	Neu 1	ACTR2_ADRB2	actr2b_adrb2a
12	Mac 7	L->R	Neu 1	ADAM10_TSPAN15	adam10a_tspan15
12	Mac 7	L->R	Neu 1	APOE_SORL1	apoeb_sorl1
12	Mac 7	L->R	Neu 1	APP_SORL1	appa_sorl1
12	Mac 7	L->R	Neu 1	APP_TSPAN15	appa_tspan15
12	Mac 7	L->R	Neu 1	ARPC5_ADRB2	arpc5a_adrb2a
12	Mac 7	L->R	Neu 1	ARPC5_ADRB2	arpc5b_adrb2a
12	Mac 7	L->R	Neu 1	C3_CD81	c3a.4_cd81a
12	Mac 7	L->R	Neu 1	C3_ITGAX	c3a.4_si:dkey-32n7.4
12	Mac 7	L->R	Neu 1	C3_ITGAX	c3a.4_itgam
12	Mac 7	L->R	Neu 1	C3_ITGB2	c3a.4_itgb2
12	Mac 7	L->R	Neu 1	CALR_ITGAV	calr_itgav
12	Mac 7	L->R	Neu 1	HBEGF_CD82	hbegfa_cd82a
12	Mac 7	L->R	Neu 1	HBEGF_CD82	hbegfa_cd82b
12	Mac 7	L->R	Neu 1	HRAS_INSR	hrasa_insra
12	Mac 7	L->R	Neu 1	HSPA8_ADRB2	hspa8_adrb2a
12	Mac 7	L->R	Neu 1	IFNG_IFNGR1	ifng1_ifngr1
12	Mac 7	L->R	Neu 1	IFNG_IFNGR1	ifng1_ifngr1l
12	Mac 7	L->R	Neu 1	IFNG_IFNGR1	ifng1_il10ra
12	Mac 7	L->R	Neu 1	IL1B_ADRB2	il1b_adrb2a
12	Mac 7	L->R	Neu 1	KITLG_EPOR	kitlga_il4r.1
12	Mac 7	L->R	Neu 1	LRPAP1_SORL1	lrpap1_sorl1
12	Mac 7	L->R	Neu 1	LTF_TFRC	tfa_tfr1b
12	Mac 7	L->R	Neu 1	NUCB2_ERAP1	nucb2b_erap1b
12	Mac 7	L->R	Neu 1	PSEN1_NOTCH2	psen1_notch2
12	Mac 7	L->R	Neu 1	SERPINE1_ITGAV	serpine1_itgav
12	Mac 7	L->R	Neu 1	THBS1_ITGA4	thbs1b_itga4
12	Mac 7	L->R	Neu 1	THBS1_SDC4	thbs1b_sdc4
13	Mac 7	L->R	Neu 2	ADAM10_TSPAN15	adam10a_tspan15
13	Mac 7	L->R	Neu 2	APP_PTGER2	appa_ptger2b
13	Mac 7	L->R	Neu 2	APP_TSPAN15	appa_tspan15
13	Mac 7	L->R	Neu 2	C3_CD81	c3a.4_cd81a
13	Mac 7	L->R	Neu 2	C3_ITGAX	c3a.4_si:dkey-32n7.4
13	Mac 7	L->R	Neu 2	C3_ITGAX	c3a.4_itgam
13	Mac 7	L->R	Neu 2	C3_ITGB2	c3a.4_itgb2
13	Mac 7	L->R	Neu 2	CALR_ITGAV	calr_itgav
13	Mac 7	L->R	Neu 2	GRN_TNFRSF1B	grn1_tnfrsf1b
13	Mac 7	L->R	Neu 2	GRN_TNFRSF1B	grn2_tnfrsf1b
13	Mac 7	L->R	Neu 2	HBEGF_CD82	hbegfa_cd82a
13	Mac 7	L->R	Neu 2	HBEGF_CD82	hbegfa_cd82b
13	Mac 7	L->R	Neu 2	HRAS_INSR	hrasa_insra
13	Mac 7	L->R	Neu 2	IFNG_IFNGR1	ifng1_ifngr1
13	Mac 7	L->R	Neu 2	IFNG_IFNGR1	ifng1_ifngr1l
13	Mac 7	L->R	Neu 2	IFNG_IFNGR1	ifng1_il10ra
13	Mac 7	L->R	Neu 2	IL16_CD4	il16_dicp2.1
13	Mac 7	L->R	Neu 2	KITLG_EPOR	kitlga_il4r.1
13	Mac 7	L->R	Neu 2	LTF_TFRC	tfa_tfr1b
13	Mac 7	L->R	Neu 2	NUCB2_ERAP1	nucb2b_erap1b
13	Mac 7	L->R	Neu 2	PSEN1_NOTCH2	psen1_notch2
13	Mac 7	L->R	Neu 2	SERPINE1_ITGAV	serpine1_itgav
13	Mac 7	L->R	Neu 2	THBS1_ITGA4	thbs1b_itga4
13	Mac 7	L->R	Neu 2	THBS1_ITGB1	thbs1b_itgb1b
13	Mac 7	L->R	Neu 2	THBS1_SDC4	thbs1b_sdc4
13	Mac 7	L->R	Neu 2	TNF_TNFRSF1B	tnfb_tnfrsf1b
14	MN	L->R	Neu 1	ACTR2_ADRB2	actr2a_adrb2a
14	MN	L->R	Neu 1	ADAM10_TSPAN15	adam10a_tspan15
14	MN	L->R	Neu 1	ADM_ADRB2	adma_adrb2a
14	MN	L->R	Neu 1	ADM_ADRB2	admb_adrb2a
14	MN	L->R	Neu 1	ADM_GPR84	admb_gpr84
14	MN	L->R	Neu 1	APOE_SORL1	apoeb_sorl1
14	MN	L->R	Neu 1	APP_SORL1	appa_sorl1
14	MN	L->R	Neu 1	APP_TSPAN15	appa_tspan15
14	MN	L->R	Neu 1	ARPC5_ADRB2	arpc5a_adrb2a
14	MN	L->R	Neu 1	ARPC5_ADRB2	arpc5b_adrb2a
14	MN	L->R	Neu 1	CALM2_ABCA1	calm3a_abca1a
14	MN	L->R	Neu 1	CALM2_ABCA1	calm3a_abca1b
14	MN	L->R	Neu 1	CALM2_INSR	calm3a_insra
14	MN	L->R	Neu 1	CALM2_KCNQ5	calm3a_kcnq5b
14	MN	L->R	Neu 1	COL1A2_ITGAV	col1a2_itgav
14	MN	L->R	Neu 1	FN1_C5AR1	fn1b_CABZ01041494.1
14	MN	L->R	Neu 1	FN1_ITGA4	fn1b_itga4
14	MN	L->R	Neu 1	FN1_ITGA5	fn1b_itga5
14	MN	L->R	Neu 1	FN1_ITGAV	fn1b_itgav
14	MN	L->R	Neu 1	HRAS_INSR	hrasb_insra
14	MN	L->R	Neu 1	HSPA8_ADRB2	hspa8_adrb2a
14	MN	L->R	Neu 1	ICAM3_ITGB2	si:ch211-66e2.5_itgb2
14	MN	L->R	Neu 1	IL1B_ADRB2	il1b_adrb2a
14	MN	L->R	Neu 1	INHBA_ACVR2A	inhbaa_acvr2aa
14	MN	L->R	Neu 1	INHBA_SMAD3	inhbaa_smad3a
14	MN	L->R	Neu 1	LRPAP1_SORL1	lrpap1_sorl1
15	MN	L->R	Neu 2	ADAM10_TSPAN15	adam10a_tspan15
15	MN	L->R	Neu 2	ADM_GPR84	admb_gpr84
15	MN	L->R	Neu 2	APP_PTGER2	appa_ptger2b
15	MN	L->R	Neu 2	APP_TSPAN15	appa_tspan15
15	MN	L->R	Neu 2	CALM2_ABCA1	calm3a_abca1a
15	MN	L->R	Neu 2	CALM2_ABCA1	calm3a_abca1b
15	MN	L->R	Neu 2	CALM2_INSR	calm3a_insra
15	MN	L->R	Neu 2	CALM2_KCNQ5	calm3a_kcnq5b
15	MN	L->R	Neu 2	COL1A2_ITGAV	col1a2_itgav
15	MN	L->R	Neu 2	COL1A2_ITGB1	col1a2_itgb1b
15	MN	L->R	Neu 2	COL5A2_ITGB1	col5a2a_itgb1b
15	MN	L->R	Neu 2	FN1_C5AR1	fn1b_CABZ01041494.1
15	MN	L->R	Neu 2	FN1_ITGA4	fn1b_itga4
15	MN	L->R	Neu 2	FN1_ITGA5	fn1b_itga5
15	MN	L->R	Neu 2	FN1_ITGAV	fn1b_itgav
15	MN	L->R	Neu 2	FN1_ITGB1	fn1b_itgb1b
15	MN	L->R	Neu 2	GRN_TNFRSF1B	grn1_tnfrsf1b
15	MN	L->R	Neu 2	GRN_TNFRSF1B	grn2_tnfrsf1b
15	MN	L->R	Neu 2	HRAS_INSR	hrasb_insra
15	MN	L->R	Neu 2	ICAM3_ITGB2	si:ch211-66e2.5_itgb2
15	MN	L->R	Neu 2	IL16_CD4	il16_dicp2.1
15	MN	L->R	Neu 2	INHBA_ACVR2A	inhbaa_acvr2aa
15	MN	L->R	Neu 2	INHBA_SMAD3	inhbaa_smad3a
15	MN	L->R	Neu 2	TNF_TNFRSF1B	tnfa_tnfrsf1b
15	MN	L->R	Neu 2	TNF_TNFRSF1B	tnfb_tnfrsf1b
16	Mac 8	L->R	Neu 1	ACTR2_ADRB2	actr2a_adrb2a
16	Mac 8	L->R	Neu 1	ADAM10_TSPAN15	adam10a_tspan15
16	Mac 8	L->R	Neu 1	ADAM28_ITGA4	adam28_itga4
16	Mac 8	L->R	Neu 1	ARPC5_ADRB2	arpc5b_adrb2a
16	Mac 8	L->R	Neu 1	CALM2_ABCA1	calm3a_abca1a
16	Mac 8	L->R	Neu 1	CALM2_ABCA1	calm3a_abca1b
16	Mac 8	L->R	Neu 1	CALM2_INSR	calm3a_insra
16	Mac 8	L->R	Neu 1	CALM2_KCNQ5	calm3a_kcnq5b
16	Mac 8	L->R	Neu 1	CXCL9_CXCR3	cxcl11.5_cxcr3.3
16	Mac 8	L->R	Neu 1	EPO_EPOR	epoa_il4r.1
16	Mac 8	L->R	Neu 1	HBEGF_CD82	hbegfa_cd82a
16	Mac 8	L->R	Neu 1	HBEGF_CD82	hbegfa_cd82b
16	Mac 8	L->R	Neu 1	HMGB1_AGER	hmgb1b_si:ch211-79k12.1
16	Mac 8	L->R	Neu 1	HMGB1_CXCR4	hmgb1b_cxcr4a
16	Mac 8	L->R	Neu 1	HMGB1_CXCR4	hmgb1b_cxcr4b
16	Mac 8	L->R	Neu 1	HSPA8_ADRB2	hspa8_adrb2a
16	Mac 8	L->R	Neu 1	IL1B_ADRB2	il1b_adrb2a
16	Mac 8	L->R	Neu 1	LGALS9_SLC1A5	lgals3b_slc1a5
16	Mac 8	L->R	Neu 1	LIN7C_ABCA1	lin7c_abca1a
16	Mac 8	L->R	Neu 1	LIN7C_ABCA1	lin7c_abca1b
16	Mac 8	L->R	Neu 1	LTF_TFRC	tfa_tfr1b
16	Mac 8	L->R	Neu 1	OMG_TNFRSF1B	omgb_tnfrsf1b
16	Mac 8	L->R	Neu 1	PSEN1_NOTCH2	psen1_notch2
16	Mac 8	L->R	Neu 1	PTGS2_ALOX5	ptgs2a_alox5a
16	Mac 8	L->R	Neu 1	SERPINE1_ITGAV	serpine1_itgav
16	Mac 8	L->R	Neu 1	TFPI_SDC4	tfpia_sdc4
16	Mac 8	L->R	Neu 1	TNF_TNFRSF1B	tnfa_tnfrsf1b
16	Mac 8	L->R	Neu 1	TNF_TRADD	tnfa_tradd
17	Mac 8	L->R	Neu 2	ADAM10_TSPAN15	adam10a_tspan15
17	Mac 8	L->R	Neu 2	ADAM28_ITGA4	adam28_itga4
17	Mac 8	L->R	Neu 2	CALM2_ABCA1	calm3a_abca1a
17	Mac 8	L->R	Neu 2	CALM2_ABCA1	calm3a_abca1b
17	Mac 8	L->R	Neu 2	CALM2_INSR	calm3a_insra
17	Mac 8	L->R	Neu 2	CALM2_KCNQ5	calm3a_kcnq5b
17	Mac 8	L->R	Neu 2	CXCL9_CXCR3	cxcl11.5_cxcr3.3
17	Mac 8	L->R	Neu 2	EPO_EPOR	epoa_il4r.1
17	Mac 8	L->R	Neu 2	GRN_TNFRSF1B	grn1_tnfrsf1b
17	Mac 8	L->R	Neu 2	GRN_TNFRSF1B	grn2_tnfrsf1b
17	Mac 8	L->R	Neu 2	HBEGF_CD82	hbegfa_cd82a
17	Mac 8	L->R	Neu 2	HBEGF_CD82	hbegfa_cd82b
17	Mac 8	L->R	Neu 2	HMGB1_AGER	hmgb1b_si:ch211-79k12.1
17	Mac 8	L->R	Neu 2	HMGB1_CXCR4	hmgb1b_cxcr4a
17	Mac 8	L->R	Neu 2	HMGB1_CXCR4	hmgb1b_cxcr4b
17	Mac 8	L->R	Neu 2	IL16_CD4	il16_dicp2.1
17	Mac 8	L->R	Neu 2	LGALS9_SLC1A5	lgals3b_slc1a5
17	Mac 8	L->R	Neu 2	LIN7C_ABCA1	lin7c_abca1a
17	Mac 8	L->R	Neu 2	LIN7C_ABCA1	lin7c_abca1b
17	Mac 8	L->R	Neu 2	LTF_TFRC	tfa_tfr1b
17	Mac 8	L->R	Neu 2	OMG_TNFRSF1B	omgb_tnfrsf1b
17	Mac 8	L->R	Neu 2	PSEN1_NOTCH2	psen1_notch2
17	Mac 8	L->R	Neu 2	PTGS2_ALOX5	ptgs2a_alox5a
17	Mac 8	L->R	Neu 2	SERPINE1_ITGAV	serpine1_itgav
17	Mac 8	L->R	Neu 2	TFPI_SDC4	tfpia_sdc4
17	Mac 8	L->R	Neu 2	TNF_TNFRSF1A	tnfa_fas
17	Mac 8	L->R	Neu 2	TNF_TNFRSF1B	tnfa_tnfrsf1b
17	Mac 8	L->R	Neu 2	TNF_TRADD	tnfa_tradd
17	Mac 8	L->R	Neu 2	TNF_TNFRSF1B	tnfb_tnfrsf1b
18	Mac 9	L->R	Neu 1	ACTR2_ADRB2	actr2a_adrb2a
18	Mac 9	L->R	Neu 1	ADAM10_TSPAN15	adam10a_tspan15
18	Mac 9	L->R	Neu 1	ADAM9_ITGAV	adam9_itgav
18	Mac 9	L->R	Neu 1	ADM_ADRB2	adma_adrb2a
18	Mac 9	L->R	Neu 1	APOE_ABCA1	apoeb_abca1a
18	Mac 9	L->R	Neu 1	APOE_ABCA1	apoeb_abca1b
18	Mac 9	L->R	Neu 1	APOE_SORL1	apoeb_sorl1
18	Mac 9	L->R	Neu 1	ARPC5_ADRB2	arpc5a_adrb2a
18	Mac 9	L->R	Neu 1	ARPC5_ADRB2	arpc5b_adrb2a
18	Mac 9	L->R	Neu 1	HBEGF_CD82	hbegfb_cd82a
18	Mac 9	L->R	Neu 1	HBEGF_CD82	hbegfb_cd82b
18	Mac 9	L->R	Neu 1	HSPA8_ADRB2	hspa8_adrb2a
18	Mac 9	L->R	Neu 1	ICAM3_ITGB2	si:ch211-66e2.3_itgb2
18	Mac 9	L->R	Neu 1	IL15_IL15RA	il15_il15ra
18	Mac 9	L->R	Neu 1	IL15_IL2RB	il15_csf2rb
18	Mac 9	L->R	Neu 1	IL15_IL2RB	il15_il21r.1
18	Mac 9	L->R	Neu 1	IL1B_ADRB2	il1b_adrb2a
18	Mac 9	L->R	Neu 1	LRPAP1_SORL1	lrpap1_sorl1
18	Mac 9	L->R	Neu 1	PSEN1_NOTCH2	psen1_notch2
18	Mac 9	L->R	Neu 1	PTGS2_ALOX5	ptgs2b_alox5a
19	Mac 9	L->R	Neu 2	ADAM10_TSPAN15	adam10a_tspan15
19	Mac 9	L->R	Neu 2	ADAM9_ITGAV	adam9_itgav
19	Mac 9	L->R	Neu 2	ADAM9_ITGB1	adam9_itgb1b
19	Mac 9	L->R	Neu 2	APOE_ABCA1	apoeb_abca1a
19	Mac 9	L->R	Neu 2	APOE_ABCA1	apoeb_abca1b
19	Mac 9	L->R	Neu 2	GRN_TNFRSF1B	grn1_tnfrsf1b
19	Mac 9	L->R	Neu 2	GRN_TNFRSF1B	grn2_tnfrsf1b
19	Mac 9	L->R	Neu 2	HBEGF_CD82	hbegfb_cd82a
19	Mac 9	L->R	Neu 2	HBEGF_CD82	hbegfb_cd82b
19	Mac 9	L->R	Neu 2	ICAM3_ITGB2	si:ch211-66e2.3_itgb2
19	Mac 9	L->R	Neu 2	IL15_IL15RA	il15_il15ra
19	Mac 9	L->R	Neu 2	IL15_IL2RB	il15_csf2rb
19	Mac 9	L->R	Neu 2	IL15_IL2RB	il15_il21r.1
19	Mac 9	L->R	Neu 2	IL16_CD4	il16_dicp2.1
19	Mac 9	L->R	Neu 2	PSEN1_NOTCH2	psen1_notch2
19	Mac 9	L->R	Neu 2	PTGS2_ALOX5	ptgs2b_alox5a
19	Mac 9	L->R	Neu 2	TIMP2_ITGB1	timp2b_itgb1b
19	Mac 9	L->R	Neu 2	TNF_TNFRSF1B	tnfa_tnfrsf1b
19	Mac 9	L->R	Neu 2	TNF_TNFRSF1B	tnfb_tnfrsf1b

## Sheet: 7d common
7dpci_Mac-ligand to Neu-receptor
Cluster pair ID	CT1	pair type	CT2	human L-R pair	L-R pair
0	Mac 1	L->R	Neu 1	ADAM10_IL6R	adam10a_il6r
0	Mac 1	L->R	Neu 1	ADAM10_NOTCH2	adam10a_notch2
0	Mac 1	L->R	Neu 1	ADAM10_TSPAN14	adam10a_tspan14
0	Mac 1	L->R	Neu 1	ADAM17_IL6R	adam17a_il6r
0	Mac 1	L->R	Neu 1	ADAM17_ITGA5	adam17a_itga5
0	Mac 1	L->R	Neu 1	ADAM28_ITGA4	adam28_itga4
0	Mac 1	L->R	Neu 1	ADAM9_ITGAV	adam9_itgav
0	Mac 1	L->R	Neu 1	AGTRAP_RACK1	agtrap_rack1
0	Mac 1	L->R	Neu 1	ALOX5AP_ALOX5	alox5ap_alox5a
0	Mac 1	L->R	Neu 1	ANGPTL4_TIE1	angptl4_tie1
0	Mac 1	L->R	Neu 1	APOE_ABCA1	apoeb_abca1a
0	Mac 1	L->R	Neu 1	APOE_ABCA1	apoeb_abca1b
0	Mac 1	L->R	Neu 1	APP_AGER	appa_si:ch211-79k12.1
0	Mac 1	L->R	Neu 1	APP_APLP2	appa_aplp2
0	Mac 1	L->R	Neu 1	APP_CD74	appa_cd74a
0	Mac 1	L->R	Neu 1	APP_CD74	appa_cd74b
0	Mac 1	L->R	Neu 1	APP_LRP10	appa_lrp10
0	Mac 1	L->R	Neu 1	APP_NOTCH2	appa_notch2
0	Mac 1	L->R	Neu 1	APP_RPSA	appa_rpsa
0	Mac 1	L->R	Neu 1	APP_AGER	appb_si:ch211-79k12.1
0	Mac 1	L->R	Neu 1	APP_APLP2	appb_aplp2
0	Mac 1	L->R	Neu 1	APP_CD74	appb_cd74a
0	Mac 1	L->R	Neu 1	APP_CD74	appb_cd74b
0	Mac 1	L->R	Neu 1	APP_LRP10	appb_lrp10
0	Mac 1	L->R	Neu 1	APP_NOTCH2	appb_notch2
0	Mac 1	L->R	Neu 1	APP_RPSA	appb_rpsa
0	Mac 1	L->R	Neu 1	ARF6_SMAP1	arf6a_smap1
0	Mac 1	L->R	Neu 1	ARF6_SMAP1	arf6b_smap1
0	Mac 1	L->R	Neu 1	BSG_SELE	bsg_selp
0	Mac 1	L->R	Neu 1	CALM2_ABCA1	calm3a_abca1a
0	Mac 1	L->R	Neu 1	CALM2_ABCA1	calm3a_abca1b
0	Mac 1	L->R	Neu 1	CALM2_INSR	calm3a_insra
0	Mac 1	L->R	Neu 1	CALM2_KCNQ5	calm3a_kcnq5b
0	Mac 1	L->R	Neu 1	CALM2_ABCA1	calm2a_abca1a
0	Mac 1	L->R	Neu 1	CALM2_ABCA1	calm2a_abca1b
0	Mac 1	L->R	Neu 1	CALM2_INSR	calm2a_insra
0	Mac 1	L->R	Neu 1	CALM2_KCNQ5	calm2a_kcnq5b
0	Mac 1	L->R	Neu 1	CALR_ITGAV	calr_itgav
0	Mac 1	L->R	Neu 1	CD99_CD81	cd99_cd81a
0	Mac 1	L->R	Neu 1	CNTF_IL6R	m17_il6r
0	Mac 1	L->R	Neu 1	CSF3_CSF3R	csf3b_csf3r
0	Mac 1	L->R	Neu 1	CXCL9_CXCR3	BX323596.2_cxcr3.3
0	Mac 1	L->R	Neu 1	F13A1_ITGA4	f13a1b_itga4
0	Mac 1	L->R	Neu 1	F13A1_ITGA4	f13a1a.1_itga4
0	Mac 1	L->R	Neu 1	FN1_C5AR1	fn1a_CABZ01041494.1
0	Mac 1	L->R	Neu 1	FN1_ITGA4	fn1a_itga4
0	Mac 1	L->R	Neu 1	FN1_ITGA5	fn1a_itga5
0	Mac 1	L->R	Neu 1	FN1_ITGAV	fn1a_itgav
0	Mac 1	L->R	Neu 1	GNAI2_ADCY7	gnai2b_adcy7
0	Mac 1	L->R	Neu 1	GNAI2_C5AR1	gnai2b_CABZ01041494.1
0	Mac 1	L->R	Neu 1	GNAI2_CXCR3	gnai2b_cxcr3.3
0	Mac 1	L->R	Neu 1	GNAI2_S1PR4	gnai2b_s1pr4
0	Mac 1	L->R	Neu 1	GNAI2_ADCY7	gnai2a_adcy7
0	Mac 1	L->R	Neu 1	GNAI2_C5AR1	gnai2a_CABZ01041494.1
0	Mac 1	L->R	Neu 1	GNAI2_CXCR3	gnai2a_cxcr3.3
0	Mac 1	L->R	Neu 1	GNAI2_S1PR4	gnai2a_s1pr4
0	Mac 1	L->R	Neu 1	GNAS_ADCY7	gnas_adcy7
0	Mac 1	L->R	Neu 1	GNAS_CRHR1	gnas_crhr1
0	Mac 1	L->R	Neu 1	GPI_AMFR	gpia_amfra
0	Mac 1	L->R	Neu 1	GRN_SORT1	grn1_sort1b
0	Mac 1	L->R	Neu 1	GRN_TNFRSF1B	grn1_tnfrsf1b
0	Mac 1	L->R	Neu 1	GRN_SORT1	grn2_sort1b
0	Mac 1	L->R	Neu 1	GRN_TNFRSF1B	grn2_tnfrsf1b
0	Mac 1	L->R	Neu 1	HBEGF_CD82	hbegfa_cd82a
0	Mac 1	L->R	Neu 1	HBEGF_CD82	hbegfa_cd82b
0	Mac 1	L->R	Neu 1	HBEGF_CD82	hbegfb_cd82a
0	Mac 1	L->R	Neu 1	HBEGF_CD82	hbegfb_cd82b
0	Mac 1	L->R	Neu 1	HMGB1_AGER	hmgb1a_si:ch211-79k12.1
0	Mac 1	L->R	Neu 1	HMGB1_CXCR4	hmgb1a_cxcr4a
0	Mac 1	L->R	Neu 1	HMGB1_CXCR4	hmgb1a_cxcr4b
0	Mac 1	L->R	Neu 1	ICAM3_ITGB2	si:ch211-66e2.3_itgb2
0	Mac 1	L->R	Neu 1	ICAM3_ITGB2	icam3_itgb2
0	Mac 1	L->R	Neu 1	IGF2_INSR	igf2b_insra
0	Mac 1	L->R	Neu 1	IL16_CD4	il16_dicp1.3-4
0	Mac 1	L->R	Neu 1	IL16_CD4	il16_dicp3.3
0	Mac 1	L->R	Neu 1	IL16_CD4	il16_dicp3.1
0	Mac 1	L->R	Neu 1	IL1B_IL1R1	il1b_CABZ01054965.1
0	Mac 1	L->R	Neu 1	IL1B_IL1R1	il1b_zmp:0000000936
0	Mac 1	L->R	Neu 1	LAMB1_ITGAV	lamb1b_itgav
0	Mac 1	L->R	Neu 1	LIN7C_ABCA1	lin7c_abca1a
0	Mac 1	L->R	Neu 1	LIN7C_ABCA1	lin7c_abca1b
0	Mac 1	L->R	Neu 1	LRPAP1_SORT1	lrpap1_sort1b
0	Mac 1	L->R	Neu 1	MFGE8_ITGAV	mfge8a_itgav
0	Mac 1	L->R	Neu 1	MFNG_NOTCH2	mfng_notch2
0	Mac 1	L->R	Neu 1	MIF_CD74	mif_cd74a
0	Mac 1	L->R	Neu 1	MIF_CD74	mif_cd74b
0	Mac 1	L->R	Neu 1	MIF_CXCR4	mif_cxcr4a
0	Mac 1	L->R	Neu 1	MIF_CXCR4	mif_cxcr4b
0	Mac 1	L->R	Neu 1	MMP9_ITGB2	mmp9_itgb2
0	Mac 1	L->R	Neu 1	NUCB2_ERAP1	nucb2a_erap1b
0	Mac 1	L->R	Neu 1	NUCB2_ERAP1	nucb2b_erap1b
0	Mac 1	L->R	Neu 1	PDGFB_ITGAV	pdgfba_itgav
0	Mac 1	L->R	Neu 1	PSAP_SORT1	psap_sort1b
0	Mac 1	L->R	Neu 1	PSEN1_NOTCH2	psen1_notch2
0	Mac 1	L->R	Neu 1	RPS19_C5AR1	rps19_CABZ01041494.1
0	Mac 1	L->R	Neu 1	SERPINE1_ITGAV	serpine1_itgav
0	Mac 1	L->R	Neu 1	TNF_TNFRSF1B	tnfa_tnfrsf1b
0	Mac 1	L->R	Neu 1	TNF_TRADD	tnfa_tradd
0	Mac 1	L->R	Neu 1	TNF_TNFRSF1B	tnfb_tnfrsf1b
0	Mac 1	L->R	Neu 1	TNF_TRADD	tnfb_tradd
1	Mac 1	L->R	Neu 2	ADAM10_IL6R	adam10a_il6r
1	Mac 1	L->R	Neu 2	ADAM10_NOTCH2	adam10a_notch2
1	Mac 1	L->R	Neu 2	ADAM10_TSPAN14	adam10a_tspan14
1	Mac 1	L->R	Neu 2	ADAM17_IL6R	adam17a_il6r
1	Mac 1	L->R	Neu 2	ADAM17_ITGA5	adam17a_itga5
1	Mac 1	L->R	Neu 2	ADAM17_ITGB1	adam17a_itgb1b
1	Mac 1	L->R	Neu 2	ADAM28_ITGA4	adam28_itga4
1	Mac 1	L->R	Neu 2	ADAM9_ITGAV	adam9_itgav
1	Mac 1	L->R	Neu 2	ADAM9_ITGB1	adam9_itgb1b
1	Mac 1	L->R	Neu 2	AGTRAP_RACK1	agtrap_rack1
1	Mac 1	L->R	Neu 2	ALOX5AP_ALOX5	alox5ap_alox5a
1	Mac 1	L->R	Neu 2	APOE_ABCA1	apoeb_abca1a
1	Mac 1	L->R	Neu 2	APOE_ABCA1	apoeb_abca1b
1	Mac 1	L->R	Neu 2	APP_AGER	appa_si:ch211-79k12.1
1	Mac 1	L->R	Neu 2	APP_APLP2	appa_aplp2
1	Mac 1	L->R	Neu 2	APP_CD74	appa_cd74a
1	Mac 1	L->R	Neu 2	APP_CD74	appa_cd74b
1	Mac 1	L->R	Neu 2	APP_LRP10	appa_lrp10
1	Mac 1	L->R	Neu 2	APP_NOTCH2	appa_notch2
1	Mac 1	L->R	Neu 2	APP_RPSA	appa_rpsa
1	Mac 1	L->R	Neu 2	APP_AGER	appb_si:ch211-79k12.1
1	Mac 1	L->R	Neu 2	APP_APLP2	appb_aplp2
1	Mac 1	L->R	Neu 2	APP_CD74	appb_cd74a
1	Mac 1	L->R	Neu 2	APP_CD74	appb_cd74b
1	Mac 1	L->R	Neu 2	APP_LRP10	appb_lrp10
1	Mac 1	L->R	Neu 2	APP_NOTCH2	appb_notch2
1	Mac 1	L->R	Neu 2	APP_RPSA	appb_rpsa
1	Mac 1	L->R	Neu 2	ARF6_SMAP1	arf6a_smap1
1	Mac 1	L->R	Neu 2	ARF6_SMAP1	arf6b_smap1
1	Mac 1	L->R	Neu 2	BSG_SELE	bsg_selp
1	Mac 1	L->R	Neu 2	CALM2_ABCA1	calm3a_abca1a
1	Mac 1	L->R	Neu 2	CALM2_ABCA1	calm3a_abca1b
1	Mac 1	L->R	Neu 2	CALM2_INSR	calm3a_insra
1	Mac 1	L->R	Neu 2	CALM2_KCNQ5	calm3a_kcnq5b
1	Mac 1	L->R	Neu 2	CALM2_ABCA1	calm2a_abca1a
1	Mac 1	L->R	Neu 2	CALM2_ABCA1	calm2a_abca1b
1	Mac 1	L->R	Neu 2	CALM2_INSR	calm2a_insra
1	Mac 1	L->R	Neu 2	CALM2_KCNQ5	calm2a_kcnq5b
1	Mac 1	L->R	Neu 2	CALR_ITGAV	calr_itgav
1	Mac 1	L->R	Neu 2	CD99_CD81	cd99_cd81a
1	Mac 1	L->R	Neu 2	CNTF_IL6R	m17_il6r
1	Mac 1	L->R	Neu 2	CSF3_CSF3R	csf3b_csf3r
1	Mac 1	L->R	Neu 2	CXCL9_CXCR3	BX323596.2_cxcr3.3
1	Mac 1	L->R	Neu 2	F13A1_ITGA4	f13a1b_itga4
1	Mac 1	L->R	Neu 2	F13A1_ITGB1	f13a1b_itgb1b
1	Mac 1	L->R	Neu 2	F13A1_ITGA4	f13a1a.1_itga4
1	Mac 1	L->R	Neu 2	F13A1_ITGB1	f13a1a.1_itgb1b
1	Mac 1	L->R	Neu 2	FN1_C5AR1	fn1a_CABZ01041494.1
1	Mac 1	L->R	Neu 2	FN1_ITGA4	fn1a_itga4
1	Mac 1	L->R	Neu 2	FN1_ITGA5	fn1a_itga5
1	Mac 1	L->R	Neu 2	FN1_ITGAV	fn1a_itgav
1	Mac 1	L->R	Neu 2	FN1_ITGB1	fn1a_itgb1b
1	Mac 1	L->R	Neu 2	GNAI2_ADCY7	gnai2b_adcy7
1	Mac 1	L->R	Neu 2	GNAI2_C5AR1	gnai2b_CABZ01041494.1
1	Mac 1	L->R	Neu 2	GNAI2_CXCR3	gnai2b_cxcr3.3
1	Mac 1	L->R	Neu 2	GNAI2_S1PR4	gnai2b_s1pr4
1	Mac 1	L->R	Neu 2	GNAI2_ADCY7	gnai2a_adcy7
1	Mac 1	L->R	Neu 2	GNAI2_C5AR1	gnai2a_CABZ01041494.1
1	Mac 1	L->R	Neu 2	GNAI2_CXCR3	gnai2a_cxcr3.3
1	Mac 1	L->R	Neu 2	GNAI2_S1PR4	gnai2a_s1pr4
1	Mac 1	L->R	Neu 2	GNAS_ADCY7	gnas_adcy7
1	Mac 1	L->R	Neu 2	GNAS_CRHR1	gnas_crhr1
1	Mac 1	L->R	Neu 2	GPI_AMFR	gpia_amfra
1	Mac 1	L->R	Neu 2	GRN_SORT1	grn1_sort1b
1	Mac 1	L->R	Neu 2	GRN_TNFRSF1A	grn1_fas
1	Mac 1	L->R	Neu 2	GRN_SORT1	grn2_sort1b
1	Mac 1	L->R	Neu 2	GRN_TNFRSF1A	grn2_fas
1	Mac 1	L->R	Neu 2	HBEGF_CD82	hbegfa_cd82a
1	Mac 1	L->R	Neu 2	HBEGF_CD82	hbegfa_cd82b
1	Mac 1	L->R	Neu 2	HBEGF_CD82	hbegfb_cd82a
1	Mac 1	L->R	Neu 2	HBEGF_CD82	hbegfb_cd82b
1	Mac 1	L->R	Neu 2	HGF_ITGB1	hgfb_itgb1b
1	Mac 1	L->R	Neu 2	HMGB1_AGER	hmgb1a_si:ch211-79k12.1
1	Mac 1	L->R	Neu 2	HMGB1_CXCR4	hmgb1a_cxcr4a
1	Mac 1	L->R	Neu 2	HMGB1_CXCR4	hmgb1a_cxcr4b
1	Mac 1	L->R	Neu 2	HSPG2_ITGB1	hspg2_itgb1b
1	Mac 1	L->R	Neu 2	ICAM3_ITGB2	si:ch211-66e2.3_itgb2
1	Mac 1	L->R	Neu 2	ICAM3_ITGB2	icam3_itgb2
1	Mac 1	L->R	Neu 2	IGF2_INSR	igf2b_insra
1	Mac 1	L->R	Neu 2	IL16_CD4	il16_dicp1.3-4
1	Mac 1	L->R	Neu 2	IL16_CD4	il16_dicp3.3
1	Mac 1	L->R	Neu 2	IL16_CD4	il16_dicp3.1
1	Mac 1	L->R	Neu 2	IL16_CD4	il16_dicp2.2
1	Mac 1	L->R	Neu 2	IL1B_IL1R1	il1b_CABZ01054965.1
1	Mac 1	L->R	Neu 2	LAMB1_ITGAV	lamb1b_itgav
1	Mac 1	L->R	Neu 2	LAMB1_ITGB1	lamb1b_itgb1b
1	Mac 1	L->R	Neu 2	LIN7C_ABCA1	lin7c_abca1a
1	Mac 1	L->R	Neu 2	LIN7C_ABCA1	lin7c_abca1b
1	Mac 1	L->R	Neu 2	LRPAP1_SORT1	lrpap1_sort1b
1	Mac 1	L->R	Neu 2	MFGE8_ITGAV	mfge8a_itgav
1	Mac 1	L->R	Neu 2	MFNG_NOTCH2	mfng_notch2
1	Mac 1	L->R	Neu 2	MIF_CD74	mif_cd74a
1	Mac 1	L->R	Neu 2	MIF_CD74	mif_cd74b
1	Mac 1	L->R	Neu 2	MIF_CXCR4	mif_cxcr4a
1	Mac 1	L->R	Neu 2	MIF_CXCR4	mif_cxcr4b
1	Mac 1	L->R	Neu 2	MMP9_ITGB2	mmp9_itgb2
1	Mac 1	L->R	Neu 2	NUCB2_ERAP1	nucb2a_erap1b
1	Mac 1	L->R	Neu 2	NUCB2_ERAP1	nucb2b_erap1b
1	Mac 1	L->R	Neu 2	PDGFB_ITGAV	pdgfba_itgav
1	Mac 1	L->R	Neu 2	PSAP_SORT1	psap_sort1b
1	Mac 1	L->R	Neu 2	PSEN1_NOTCH2	psen1_notch2
1	Mac 1	L->R	Neu 2	RPS19_C5AR1	rps19_CABZ01041494.1
1	Mac 1	L->R	Neu 2	SERPINE1_ITGAV	serpine1_itgav
1	Mac 1	L->R	Neu 2	TIMP2_ITGB1	timp2b_itgb1b
1	Mac 1	L->R	Neu 2	TNF_TNFRSF1A	tnfa_fas
1	Mac 1	L->R	Neu 2	TNF_TRADD	tnfa_tradd
1	Mac 1	L->R	Neu 2	TNF_TNFRSF1A	tnfb_fas
1	Mac 1	L->R	Neu 2	TNF_TRADD	tnfb_tradd
2	Mac 2	L->R	Neu 1	ADAM10_IL6R	adam10a_il6r
2	Mac 2	L->R	Neu 1	ADAM10_NOTCH2	adam10a_notch2
2	Mac 2	L->R	Neu 1	ADAM10_TSPAN14	adam10a_tspan14
2	Mac 2	L->R	Neu 1	ADAM17_IL6R	adam17a_il6r
2	Mac 2	L->R	Neu 1	ADAM17_ITGA5	adam17a_itga5
2	Mac 2	L->R	Neu 1	ADAM28_ITGA4	adam28_itga4
2	Mac 2	L->R	Neu 1	ADAM9_ITGAV	adam9_itgav
2	Mac 2	L->R	Neu 1	AGTRAP_RACK1	agtrap_rack1
2	Mac 2	L->R	Neu 1	ALOX5AP_ALOX5	alox5ap_alox5a
2	Mac 2	L->R	Neu 1	APOE_ABCA1	apoeb_abca1a
2	Mac 2	L->R	Neu 1	APOE_ABCA1	apoeb_abca1b
2	Mac 2	L->R	Neu 1	APP_AGER	appa_si:ch211-79k12.1
2	Mac 2	L->R	Neu 1	APP_APLP2	appa_aplp2
2	Mac 2	L->R	Neu 1	APP_CD74	appa_cd74a
2	Mac 2	L->R	Neu 1	APP_CD74	appa_cd74b
2	Mac 2	L->R	Neu 1	APP_LRP10	appa_lrp10
2	Mac 2	L->R	Neu 1	APP_NOTCH2	appa_notch2
2	Mac 2	L->R	Neu 1	APP_RPSA	appa_rpsa
2	Mac 2	L->R	Neu 1	ARF6_SMAP1	arf6a_smap1
2	Mac 2	L->R	Neu 1	ARF6_SMAP1	arf6b_smap1
2	Mac 2	L->R	Neu 1	BSG_SELE	bsg_selp
2	Mac 2	L->R	Neu 1	CALM2_ABCA1	calm3a_abca1a
2	Mac 2	L->R	Neu 1	CALM2_ABCA1	calm3a_abca1b
2	Mac 2	L->R	Neu 1	CALM2_INSR	calm3a_insra
2	Mac 2	L->R	Neu 1	CALM2_KCNQ5	calm3a_kcnq5b
2	Mac 2	L->R	Neu 1	CALM2_ABCA1	calm2a_abca1a
2	Mac 2	L->R	Neu 1	CALM2_ABCA1	calm2a_abca1b
2	Mac 2	L->R	Neu 1	CALM2_INSR	calm2a_insra
2	Mac 2	L->R	Neu 1	CALM2_KCNQ5	calm2a_kcnq5b
2	Mac 2	L->R	Neu 1	CALR_ITGAV	calr_itgav
2	Mac 2	L->R	Neu 1	CD99_CD81	cd99_cd81a
2	Mac 2	L->R	Neu 1	CSF3_CSF3R	csf3b_csf3r
2	Mac 2	L->R	Neu 1	CXCL9_CXCR3	BX323596.2_cxcr3.3
2	Mac 2	L->R	Neu 1	F13A1_ITGA4	f13a1b_itga4
2	Mac 2	L->R	Neu 1	F13A1_ITGA4	f13a1a.1_itga4
2	Mac 2	L->R	Neu 1	FN1_C5AR1	fn1a_CABZ01041494.1
2	Mac 2	L->R	Neu 1	FN1_ITGA4	fn1a_itga4
2	Mac 2	L->R	Neu 1	FN1_ITGA5	fn1a_itga5
2	Mac 2	L->R	Neu 1	FN1_ITGAV	fn1a_itgav
2	Mac 2	L->R	Neu 1	GNAI2_ADCY7	gnai2b_adcy7
2	Mac 2	L->R	Neu 1	GNAI2_C5AR1	gnai2b_CABZ01041494.1
2	Mac 2	L->R	Neu 1	GNAI2_CXCR3	gnai2b_cxcr3.3
2	Mac 2	L->R	Neu 1	GNAI2_S1PR4	gnai2b_s1pr4
2	Mac 2	L->R	Neu 1	GNAI2_ADCY7	gnai2a_adcy7
2	Mac 2	L->R	Neu 1	GNAI2_C5AR1	gnai2a_CABZ01041494.1
2	Mac 2	L->R	Neu 1	GNAI2_CXCR3	gnai2a_cxcr3.3
2	Mac 2	L->R	Neu 1	GNAI2_S1PR4	gnai2a_s1pr4
2	Mac 2	L->R	Neu 1	GNAS_ADCY7	gnas_adcy7
2	Mac 2	L->R	Neu 1	GNAS_CRHR1	gnas_crhr1
2	Mac 2	L->R	Neu 1	GPI_AMFR	gpia_amfra
2	Mac 2	L->R	Neu 1	GRN_SORT1	grn1_sort1b
2	Mac 2	L->R	Neu 1	GRN_TNFRSF1B	grn1_tnfrsf1b
2	Mac 2	L->R	Neu 1	GRN_SORT1	grn2_sort1b
2	Mac 2	L->R	Neu 1	GRN_TNFRSF1B	grn2_tnfrsf1b
2	Mac 2	L->R	Neu 1	HBEGF_CD82	hbegfa_cd82a
2	Mac 2	L->R	Neu 1	HBEGF_CD82	hbegfa_cd82b
2	Mac 2	L->R	Neu 1	HBEGF_CD82	hbegfb_cd82a
2	Mac 2	L->R	Neu 1	HBEGF_CD82	hbegfb_cd82b
2	Mac 2	L->R	Neu 1	HMGB1_AGER	hmgb1a_si:ch211-79k12.1
2	Mac 2	L->R	Neu 1	HMGB1_CXCR4	hmgb1a_cxcr4a
2	Mac 2	L->R	Neu 1	HMGB1_CXCR4	hmgb1a_cxcr4b
2	Mac 2	L->R	Neu 1	ICAM3_ITGB2	si:ch211-66e2.3_itgb2
2	Mac 2	L->R	Neu 1	ICAM3_ITGB2	si:ch73-208g10.1_itgb2
2	Mac 2	L->R	Neu 1	ICAM3_ITGB2	icam3_itgb2
2	Mac 2	L->R	Neu 1	IGF2_INSR	igf2b_insra
2	Mac 2	L->R	Neu 1	IL16_CD4	il16_dicp1.3-4
2	Mac 2	L->R	Neu 1	IL16_CD4	il16_dicp3.3
2	Mac 2	L->R	Neu 1	IL16_CD4	il16_dicp3.1
2	Mac 2	L->R	Neu 1	IL1B_IL1R1	il1b_CABZ01054965.1
2	Mac 2	L->R	Neu 1	IL1B_IL1R1	il1b_zmp:0000000936
2	Mac 2	L->R	Neu 1	INHBA_ACVR2A	inhbaa_acvr2aa
2	Mac 2	L->R	Neu 1	INHBA_SMAD3	inhbaa_smad3a
2	Mac 2	L->R	Neu 1	LRPAP1_SORT1	lrpap1_sort1b
2	Mac 2	L->R	Neu 1	MFNG_NOTCH2	mfng_notch2
2	Mac 2	L->R	Neu 1	MIF_CD74	mif_cd74a
2	Mac 2	L->R	Neu 1	MIF_CD74	mif_cd74b
2	Mac 2	L->R	Neu 1	MIF_CXCR4	mif_cxcr4a
2	Mac 2	L->R	Neu 1	MIF_CXCR4	mif_cxcr4b
2	Mac 2	L->R	Neu 1	MMP9_ITGB2	mmp9_itgb2
2	Mac 2	L->R	Neu 1	NUCB2_ERAP1	nucb2a_erap1b
2	Mac 2	L->R	Neu 1	PDGFB_ITGAV	pdgfba_itgav
2	Mac 2	L->R	Neu 1	PSAP_SORT1	psap_sort1b
2	Mac 2	L->R	Neu 1	RPS19_C5AR1	rps19_CABZ01041494.1
2	Mac 2	L->R	Neu 1	SERPINE1_ITGAV	serpine1_itgav
2	Mac 2	L->R	Neu 1	TNF_TNFRSF1B	tnfa_tnfrsf1b
2	Mac 2	L->R	Neu 1	TNF_TRADD	tnfa_tradd
2	Mac 2	L->R	Neu 1	TNF_TNFRSF1B	tnfb_tnfrsf1b
2	Mac 2	L->R	Neu 1	TNF_TRADD	tnfb_tradd
3	Mac 2	L->R	Neu 2	ADAM10_IL6R	adam10a_il6r
3	Mac 2	L->R	Neu 2	ADAM10_NOTCH2	adam10a_notch2
3	Mac 2	L->R	Neu 2	ADAM10_TSPAN14	adam10a_tspan14
3	Mac 2	L->R	Neu 2	ADAM17_IL6R	adam17a_il6r
3	Mac 2	L->R	Neu 2	ADAM17_ITGA5	adam17a_itga5
3	Mac 2	L->R	Neu 2	ADAM17_ITGB1	adam17a_itgb1b
3	Mac 2	L->R	Neu 2	ADAM28_ITGA4	adam28_itga4
3	Mac 2	L->R	Neu 2	ADAM9_ITGAV	adam9_itgav
3	Mac 2	L->R	Neu 2	ADAM9_ITGB1	adam9_itgb1b
3	Mac 2	L->R	Neu 2	AGTRAP_RACK1	agtrap_rack1
3	Mac 2	L->R	Neu 2	ALOX5AP_ALOX5	alox5ap_alox5a
3	Mac 2	L->R	Neu 2	APOE_ABCA1	apoeb_abca1a
3	Mac 2	L->R	Neu 2	APOE_ABCA1	apoeb_abca1b
3	Mac 2	L->R	Neu 2	APP_AGER	appa_si:ch211-79k12.1
3	Mac 2	L->R	Neu 2	APP_APLP2	appa_aplp2
3	Mac 2	L->R	Neu 2	APP_CD74	appa_cd74a
3	Mac 2	L->R	Neu 2	APP_CD74	appa_cd74b
3	Mac 2	L->R	Neu 2	APP_LRP10	appa_lrp10
3	Mac 2	L->R	Neu 2	APP_NOTCH2	appa_notch2
3	Mac 2	L->R	Neu 2	APP_RPSA	appa_rpsa
3	Mac 2	L->R	Neu 2	ARF6_SMAP1	arf6a_smap1
3	Mac 2	L->R	Neu 2	ARF6_SMAP1	arf6b_smap1
3	Mac 2	L->R	Neu 2	BSG_SELE	bsg_selp
3	Mac 2	L->R	Neu 2	CALM2_ABCA1	calm3a_abca1a
3	Mac 2	L->R	Neu 2	CALM2_ABCA1	calm3a_abca1b
3	Mac 2	L->R	Neu 2	CALM2_INSR	calm3a_insra
3	Mac 2	L->R	Neu 2	CALM2_KCNQ5	calm3a_kcnq5b
3	Mac 2	L->R	Neu 2	CALM2_ABCA1	calm2a_abca1a
3	Mac 2	L->R	Neu 2	CALM2_ABCA1	calm2a_abca1b
3	Mac 2	L->R	Neu 2	CALM2_INSR	calm2a_insra
3	Mac 2	L->R	Neu 2	CALM2_KCNQ5	calm2a_kcnq5b
3	Mac 2	L->R	Neu 2	CALR_ITGAV	calr_itgav
3	Mac 2	L->R	Neu 2	CD99_CD81	cd99_cd81a
3	Mac 2	L->R	Neu 2	CSF3_CSF3R	csf3b_csf3r
3	Mac 2	L->R	Neu 2	CXCL9_CXCR3	BX323596.2_cxcr3.3
3	Mac 2	L->R	Neu 2	F13A1_ITGA4	f13a1b_itga4
3	Mac 2	L->R	Neu 2	F13A1_ITGB1	f13a1b_itgb1b
3	Mac 2	L->R	Neu 2	F13A1_ITGA4	f13a1a.1_itga4
3	Mac 2	L->R	Neu 2	F13A1_ITGB1	f13a1a.1_itgb1b
3	Mac 2	L->R	Neu 2	FN1_C5AR1	fn1a_CABZ01041494.1
3	Mac 2	L->R	Neu 2	FN1_ITGA4	fn1a_itga4
3	Mac 2	L->R	Neu 2	FN1_ITGA5	fn1a_itga5
3	Mac 2	L->R	Neu 2	FN1_ITGAV	fn1a_itgav
3	Mac 2	L->R	Neu 2	FN1_ITGB1	fn1a_itgb1b
3	Mac 2	L->R	Neu 2	GNAI2_ADCY7	gnai2b_adcy7
3	Mac 2	L->R	Neu 2	GNAI2_C5AR1	gnai2b_CABZ01041494.1
3	Mac 2	L->R	Neu 2	GNAI2_CXCR3	gnai2b_cxcr3.3
3	Mac 2	L->R	Neu 2	GNAI2_S1PR4	gnai2b_s1pr4
3	Mac 2	L->R	Neu 2	GNAI2_ADCY7	gnai2a_adcy7
3	Mac 2	L->R	Neu 2	GNAI2_C5AR1	gnai2a_CABZ01041494.1
3	Mac 2	L->R	Neu 2	GNAI2_CXCR3	gnai2a_cxcr3.3
3	Mac 2	L->R	Neu 2	GNAI2_S1PR4	gnai2a_s1pr4
3	Mac 2	L->R	Neu 2	GNAS_ADCY7	gnas_adcy7
3	Mac 2	L->R	Neu 2	GNAS_CRHR1	gnas_crhr1
3	Mac 2	L->R	Neu 2	GPI_AMFR	gpia_amfra
3	Mac 2	L->R	Neu 2	GRN_SORT1	grn1_sort1b
3	Mac 2	L->R	Neu 2	GRN_TNFRSF1A	grn1_fas
3	Mac 2	L->R	Neu 2	GRN_SORT1	grn2_sort1b
3	Mac 2	L->R	Neu 2	GRN_TNFRSF1A	grn2_fas
3	Mac 2	L->R	Neu 2	HBEGF_CD82	hbegfa_cd82a
3	Mac 2	L->R	Neu 2	HBEGF_CD82	hbegfa_cd82b
3	Mac 2	L->R	Neu 2	HBEGF_CD82	hbegfb_cd82a
3	Mac 2	L->R	Neu 2	HBEGF_CD82	hbegfb_cd82b
3	Mac 2	L->R	Neu 2	HMGB1_AGER	hmgb1a_si:ch211-79k12.1
3	Mac 2	L->R	Neu 2	HMGB1_CXCR4	hmgb1a_cxcr4a
3	Mac 2	L->R	Neu 2	HMGB1_CXCR4	hmgb1a_cxcr4b
3	Mac 2	L->R	Neu 2	ICAM3_ITGB2	si:ch211-66e2.3_itgb2
3	Mac 2	L->R	Neu 2	ICAM3_ITGB2	si:ch73-208g10.1_itgb2
3	Mac 2	L->R	Neu 2	ICAM3_ITGB2	icam3_itgb2
3	Mac 2	L->R	Neu 2	IGF2_INSR	igf2b_insra
3	Mac 2	L->R	Neu 2	IL16_CD4	il16_dicp1.3-4
3	Mac 2	L->R	Neu 2	IL16_CD4	il16_dicp3.3
3	Mac 2	L->R	Neu 2	IL16_CD4	il16_dicp3.1
3	Mac 2	L->R	Neu 2	IL16_CD4	il16_dicp2.2
3	Mac 2	L->R	Neu 2	IL1B_IL1R1	il1b_CABZ01054965.1
3	Mac 2	L->R	Neu 2	INHBA_ACVR2A	inhbaa_acvr2aa
3	Mac 2	L->R	Neu 2	INHBA_SMAD3	inhbaa_smad3a
3	Mac 2	L->R	Neu 2	LRPAP1_SORT1	lrpap1_sort1b
3	Mac 2	L->R	Neu 2	MFNG_NOTCH2	mfng_notch2
3	Mac 2	L->R	Neu 2	MIF_CD74	mif_cd74a
3	Mac 2	L->R	Neu 2	MIF_CD74	mif_cd74b
3	Mac 2	L->R	Neu 2	MIF_CXCR4	mif_cxcr4a
3	Mac 2	L->R	Neu 2	MIF_CXCR4	mif_cxcr4b
3	Mac 2	L->R	Neu 2	MMP9_ITGB2	mmp9_itgb2
3	Mac 2	L->R	Neu 2	NUCB2_ERAP1	nucb2a_erap1b
3	Mac 2	L->R	Neu 2	PDGFB_ITGAV	pdgfba_itgav
3	Mac 2	L->R	Neu 2	PSAP_SORT1	psap_sort1b
3	Mac 2	L->R	Neu 2	RPS19_C5AR1	rps19_CABZ01041494.1
3	Mac 2	L->R	Neu 2	SERPINE1_ITGAV	serpine1_itgav
3	Mac 2	L->R	Neu 2	TIMP2_ITGB1	timp2b_itgb1b
3	Mac 2	L->R	Neu 2	TNF_TNFRSF1A	tnfa_fas
3	Mac 2	L->R	Neu 2	TNF_TRADD	tnfa_tradd
3	Mac 2	L->R	Neu 2	TNF_TNFRSF1A	tnfb_fas
3	Mac 2	L->R	Neu 2	TNF_TRADD	tnfb_tradd
4	Mac 3	L->R	Neu 1	ADAM10_IL6R	adam10a_il6r
4	Mac 3	L->R	Neu 1	ADAM10_NOTCH2	adam10a_notch2
4	Mac 3	L->R	Neu 1	ADAM10_TSPAN14	adam10a_tspan14
4	Mac 3	L->R	Neu 1	ADAM17_IL6R	adam17a_il6r
4	Mac 3	L->R	Neu 1	ADAM17_ITGA5	adam17a_itga5
4	Mac 3	L->R	Neu 1	ADAM28_ITGA4	adam28_itga4
4	Mac 3	L->R	Neu 1	ADAM9_ITGAV	adam9_itgav
4	Mac 3	L->R	Neu 1	AGTRAP_RACK1	agtrap_rack1
4	Mac 3	L->R	Neu 1	ALOX5AP_ALOX5	alox5ap_alox5a
4	Mac 3	L->R	Neu 1	APOE_ABCA1	apoeb_abca1a
4	Mac 3	L->R	Neu 1	APOE_ABCA1	apoeb_abca1b
4	Mac 3	L->R	Neu 1	APP_AGER	appa_si:ch211-79k12.1
4	Mac 3	L->R	Neu 1	APP_APLP2	appa_aplp2
4	Mac 3	L->R	Neu 1	APP_CD74	appa_cd74a
4	Mac 3	L->R	Neu 1	APP_CD74	appa_cd74b
4	Mac 3	L->R	Neu 1	APP_LRP10	appa_lrp10
4	Mac 3	L->R	Neu 1	APP_NOTCH2	appa_notch2
4	Mac 3	L->R	Neu 1	APP_RPSA	appa_rpsa
4	Mac 3	L->R	Neu 1	APP_AGER	appb_si:ch211-79k12.1
4	Mac 3	L->R	Neu 1	APP_APLP2	appb_aplp2
4	Mac 3	L->R	Neu 1	APP_CD74	appb_cd74a
4	Mac 3	L->R	Neu 1	APP_CD74	appb_cd74b
4	Mac 3	L->R	Neu 1	APP_LRP10	appb_lrp10
4	Mac 3	L->R	Neu 1	APP_NOTCH2	appb_notch2
4	Mac 3	L->R	Neu 1	APP_RPSA	appb_rpsa
4	Mac 3	L->R	Neu 1	ARF6_SMAP1	arf6a_smap1
4	Mac 3	L->R	Neu 1	ARF6_SMAP1	arf6b_smap1
4	Mac 3	L->R	Neu 1	BSG_SELE	bsg_selp
4	Mac 3	L->R	Neu 1	CALM2_ABCA1	calm2a_abca1a
4	Mac 3	L->R	Neu 1	CALM2_ABCA1	calm2a_abca1b
4	Mac 3	L->R	Neu 1	CALM2_INSR	calm2a_insra
4	Mac 3	L->R	Neu 1	CALM2_KCNQ5	calm2a_kcnq5b
4	Mac 3	L->R	Neu 1	CALR_ITGAV	calr_itgav
4	Mac 3	L->R	Neu 1	CD99_CD81	cd99_cd81a
4	Mac 3	L->R	Neu 1	CNTF_IL6R	m17_il6r
4	Mac 3	L->R	Neu 1	CSF3_CSF3R	csf3a_csf3r
4	Mac 3	L->R	Neu 1	CSF3_CSF3R	csf3b_csf3r
4	Mac 3	L->R	Neu 1	CXCL9_CXCR3	cxcl11.6_cxcr3.3
4	Mac 3	L->R	Neu 1	CXCL9_CXCR3	BX323596.2_cxcr3.3
4	Mac 3	L->R	Neu 1	F13A1_ITGA4	f13a1b_itga4
4	Mac 3	L->R	Neu 1	F13A1_ITGA4	f13a1a.1_itga4
4	Mac 3	L->R	Neu 1	FN1_C5AR1	fn1a_CABZ01041494.1
4	Mac 3	L->R	Neu 1	FN1_ITGA4	fn1a_itga4
4	Mac 3	L->R	Neu 1	FN1_ITGA5	fn1a_itga5
4	Mac 3	L->R	Neu 1	FN1_ITGAV	fn1a_itgav
4	Mac 3	L->R	Neu 1	GNAI2_ADCY7	gnai2b_adcy7
4	Mac 3	L->R	Neu 1	GNAI2_C5AR1	gnai2b_CABZ01041494.1
4	Mac 3	L->R	Neu 1	GNAI2_CXCR3	gnai2b_cxcr3.3
4	Mac 3	L->R	Neu 1	GNAI2_S1PR4	gnai2b_s1pr4
4	Mac 3	L->R	Neu 1	GNAI2_ADCY7	gnai2a_adcy7
4	Mac 3	L->R	Neu 1	GNAI2_C5AR1	gnai2a_CABZ01041494.1
4	Mac 3	L->R	Neu 1	GNAI2_CXCR3	gnai2a_cxcr3.3
4	Mac 3	L->R	Neu 1	GNAI2_S1PR4	gnai2a_s1pr4
4	Mac 3	L->R	Neu 1	GNAS_ADCY7	gnas_adcy7
4	Mac 3	L->R	Neu 1	GNAS_CRHR1	gnas_crhr1
4	Mac 3	L->R	Neu 1	GPI_AMFR	gpia_amfra
4	Mac 3	L->R	Neu 1	GRN_SORT1	grn1_sort1b
4	Mac 3	L->R	Neu 1	GRN_TNFRSF1B	grn1_tnfrsf1b
4	Mac 3	L->R	Neu 1	GRN_SORT1	grn2_sort1b
4	Mac 3	L->R	Neu 1	GRN_TNFRSF1B	grn2_tnfrsf1b
4	Mac 3	L->R	Neu 1	HBEGF_CD82	hbegfa_cd82a
4	Mac 3	L->R	Neu 1	HBEGF_CD82	hbegfa_cd82b
4	Mac 3	L->R	Neu 1	HBEGF_CD82	hbegfb_cd82a
4	Mac 3	L->R	Neu 1	HBEGF_CD82	hbegfb_cd82b
4	Mac 3	L->R	Neu 1	HMGB1_AGER	hmgb1a_si:ch211-79k12.1
4	Mac 3	L->R	Neu 1	HMGB1_CXCR4	hmgb1a_cxcr4a
4	Mac 3	L->R	Neu 1	HMGB1_CXCR4	hmgb1a_cxcr4b
4	Mac 3	L->R	Neu 1	ICAM3_ITGB2	si:ch211-66e2.3_itgb2
4	Mac 3	L->R	Neu 1	ICAM3_ITGB2	icam3_itgb2
4	Mac 3	L->R	Neu 1	IGF2_INSR	igf2b_insra
4	Mac 3	L->R	Neu 1	IL16_CD4	il16_dicp1.3-4
4	Mac 3	L->R	Neu 1	IL16_CD4	il16_dicp3.3
4	Mac 3	L->R	Neu 1	IL16_CD4	il16_dicp3.1
4	Mac 3	L->R	Neu 1	IL1B_IL1R1	il1b_CABZ01054965.1
4	Mac 3	L->R	Neu 1	IL1B_IL1R1	il1b_zmp:0000000936
4	Mac 3	L->R	Neu 1	LRPAP1_SORT1	lrpap1_sort1b
4	Mac 3	L->R	Neu 1	MFNG_NOTCH2	mfng_notch2
4	Mac 3	L->R	Neu 1	MIF_CD74	mif_cd74a
4	Mac 3	L->R	Neu 1	MIF_CD74	mif_cd74b
4	Mac 3	L->R	Neu 1	MIF_CXCR4	mif_cxcr4a
4	Mac 3	L->R	Neu 1	MIF_CXCR4	mif_cxcr4b
4	Mac 3	L->R	Neu 1	NUCB2_ERAP1	nucb2a_erap1b
4	Mac 3	L->R	Neu 1	PDGFB_ITGAV	pdgfba_itgav
4	Mac 3	L->R	Neu 1	PSAP_SORT1	psap_sort1b
4	Mac 3	L->R	Neu 1	PSEN1_NOTCH2	psen1_notch2
4	Mac 3	L->R	Neu 1	RPS19_C5AR1	rps19_CABZ01041494.1
4	Mac 3	L->R	Neu 1	S100A1_AGER	s100a1_si:ch211-79k12.1
4	Mac 3	L->R	Neu 1	SERPINE1_ITGAV	serpine1_itgav
4	Mac 3	L->R	Neu 1	TNF_TNFRSF1B	tnfa_tnfrsf1b
4	Mac 3	L->R	Neu 1	TNF_TRADD	tnfa_tradd
4	Mac 3	L->R	Neu 1	TNF_TNFRSF1B	tnfb_tnfrsf1b
4	Mac 3	L->R	Neu 1	TNF_TRADD	tnfb_tradd
4	Mac 3	L->R	Neu 1	TNFSF13B_TFRC	tnfsf13b_tfr1b
5	Mac 3	L->R	Neu 2	ADAM10_IL6R	adam10a_il6r
5	Mac 3	L->R	Neu 2	ADAM10_NOTCH2	adam10a_notch2
5	Mac 3	L->R	Neu 2	ADAM10_TSPAN14	adam10a_tspan14
5	Mac 3	L->R	Neu 2	ADAM17_IL6R	adam17a_il6r
5	Mac 3	L->R	Neu 2	ADAM17_ITGA5	adam17a_itga5
5	Mac 3	L->R	Neu 2	ADAM17_ITGB1	adam17a_itgb1b
5	Mac 3	L->R	Neu 2	ADAM28_ITGA4	adam28_itga4
5	Mac 3	L->R	Neu 2	ADAM9_ITGAV	adam9_itgav
5	Mac 3	L->R	Neu 2	ADAM9_ITGB1	adam9_itgb1b
5	Mac 3	L->R	Neu 2	AGTRAP_RACK1	agtrap_rack1
5	Mac 3	L->R	Neu 2	ALOX5AP_ALOX5	alox5ap_alox5a
5	Mac 3	L->R	Neu 2	APOE_ABCA1	apoeb_abca1a
5	Mac 3	L->R	Neu 2	APOE_ABCA1	apoeb_abca1b
5	Mac 3	L->R	Neu 2	APP_AGER	appa_si:ch211-79k12.1
5	Mac 3	L->R	Neu 2	APP_APLP2	appa_aplp2
5	Mac 3	L->R	Neu 2	APP_CD74	appa_cd74a
5	Mac 3	L->R	Neu 2	APP_CD74	appa_cd74b
5	Mac 3	L->R	Neu 2	APP_LRP10	appa_lrp10
5	Mac 3	L->R	Neu 2	APP_NOTCH2	appa_notch2
5	Mac 3	L->R	Neu 2	APP_RPSA	appa_rpsa
5	Mac 3	L->R	Neu 2	APP_AGER	appb_si:ch211-79k12.1
5	Mac 3	L->R	Neu 2	APP_APLP2	appb_aplp2
5	Mac 3	L->R	Neu 2	APP_CD74	appb_cd74a
5	Mac 3	L->R	Neu 2	APP_CD74	appb_cd74b
5	Mac 3	L->R	Neu 2	APP_LRP10	appb_lrp10
5	Mac 3	L->R	Neu 2	APP_NOTCH2	appb_notch2
5	Mac 3	L->R	Neu 2	APP_RPSA	appb_rpsa
5	Mac 3	L->R	Neu 2	ARF6_SMAP1	arf6a_smap1
5	Mac 3	L->R	Neu 2	ARF6_SMAP1	arf6b_smap1
5	Mac 3	L->R	Neu 2	BSG_SELE	bsg_selp
5	Mac 3	L->R	Neu 2	CALM2_ABCA1	calm2a_abca1a
5	Mac 3	L->R	Neu 2	CALM2_ABCA1	calm2a_abca1b
5	Mac 3	L->R	Neu 2	CALM2_INSR	calm2a_insra
5	Mac 3	L->R	Neu 2	CALM2_KCNQ5	calm2a_kcnq5b
5	Mac 3	L->R	Neu 2	CALR_ITGAV	calr_itgav
5	Mac 3	L->R	Neu 2	CD99_CD81	cd99_cd81a
5	Mac 3	L->R	Neu 2	CNTF_IL6R	m17_il6r
5	Mac 3	L->R	Neu 2	CSF3_CSF3R	csf3a_csf3r
5	Mac 3	L->R	Neu 2	CSF3_CSF3R	csf3b_csf3r
5	Mac 3	L->R	Neu 2	CXCL9_CXCR3	cxcl11.6_cxcr3.3
5	Mac 3	L->R	Neu 2	CXCL9_CXCR3	BX323596.2_cxcr3.3
5	Mac 3	L->R	Neu 2	F13A1_ITGA4	f13a1b_itga4
5	Mac 3	L->R	Neu 2	F13A1_ITGB1	f13a1b_itgb1b
5	Mac 3	L->R	Neu 2	F13A1_ITGA4	f13a1a.1_itga4
5	Mac 3	L->R	Neu 2	F13A1_ITGB1	f13a1a.1_itgb1b
5	Mac 3	L->R	Neu 2	FN1_C5AR1	fn1a_CABZ01041494.1
5	Mac 3	L->R	Neu 2	FN1_ITGA4	fn1a_itga4
5	Mac 3	L->R	Neu 2	FN1_ITGA5	fn1a_itga5
5	Mac 3	L->R	Neu 2	FN1_ITGAV	fn1a_itgav
5	Mac 3	L->R	Neu 2	FN1_ITGB1	fn1a_itgb1b
5	Mac 3	L->R	Neu 2	GNAI2_ADCY7	gnai2b_adcy7
5	Mac 3	L->R	Neu 2	GNAI2_C5AR1	gnai2b_CABZ01041494.1
5	Mac 3	L->R	Neu 2	GNAI2_CXCR3	gnai2b_cxcr3.3
5	Mac 3	L->R	Neu 2	GNAI2_S1PR4	gnai2b_s1pr4
5	Mac 3	L->R	Neu 2	GNAI2_ADCY7	gnai2a_adcy7
5	Mac 3	L->R	Neu 2	GNAI2_C5AR1	gnai2a_CABZ01041494.1
5	Mac 3	L->R	Neu 2	GNAI2_CXCR3	gnai2a_cxcr3.3
5	Mac 3	L->R	Neu 2	GNAI2_S1PR4	gnai2a_s1pr4
5	Mac 3	L->R	Neu 2	GNAS_ADCY7	gnas_adcy7
5	Mac 3	L->R	Neu 2	GNAS_CRHR1	gnas_crhr1
5	Mac 3	L->R	Neu 2	GPI_AMFR	gpia_amfra
5	Mac 3	L->R	Neu 2	GRN_SORT1	grn1_sort1b
5	Mac 3	L->R	Neu 2	GRN_TNFRSF1A	grn1_fas
5	Mac 3	L->R	Neu 2	GRN_SORT1	grn2_sort1b
5	Mac 3	L->R	Neu 2	GRN_TNFRSF1A	grn2_fas
5	Mac 3	L->R	Neu 2	HBEGF_CD82	hbegfa_cd82a
5	Mac 3	L->R	Neu 2	HBEGF_CD82	hbegfa_cd82b
5	Mac 3	L->R	Neu 2	HBEGF_CD82	hbegfb_cd82a
5	Mac 3	L->R	Neu 2	HBEGF_CD82	hbegfb_cd82b
5	Mac 3	L->R	Neu 2	HGF_ITGB1	hgfb_itgb1b
5	Mac 3	L->R	Neu 2	HMGB1_AGER	hmgb1a_si:ch211-79k12.1
5	Mac 3	L->R	Neu 2	HMGB1_CXCR4	hmgb1a_cxcr4a
5	Mac 3	L->R	Neu 2	HMGB1_CXCR4	hmgb1a_cxcr4b
5	Mac 3	L->R	Neu 2	ICAM3_ITGB2	si:ch211-66e2.3_itgb2
5	Mac 3	L->R	Neu 2	ICAM3_ITGB2	icam3_itgb2
5	Mac 3	L->R	Neu 2	IGF2_INSR	igf2b_insra
5	Mac 3	L->R	Neu 2	IL16_CD4	il16_dicp1.3-4
5	Mac 3	L->R	Neu 2	IL16_CD4	il16_dicp3.3
5	Mac 3	L->R	Neu 2	IL16_CD4	il16_dicp3.1
5	Mac 3	L->R	Neu 2	IL16_CD4	il16_dicp2.2
5	Mac 3	L->R	Neu 2	IL1B_IL1R1	il1b_CABZ01054965.1
5	Mac 3	L->R	Neu 2	LRPAP1_SORT1	lrpap1_sort1b
5	Mac 3	L->R	Neu 2	MFNG_NOTCH2	mfng_notch2
5	Mac 3	L->R	Neu 2	MIF_CD74	mif_cd74a
5	Mac 3	L->R	Neu 2	MIF_CD74	mif_cd74b
5	Mac 3	L->R	Neu 2	MIF_CXCR4	mif_cxcr4a
5	Mac 3	L->R	Neu 2	MIF_CXCR4	mif_cxcr4b
5	Mac 3	L->R	Neu 2	NUCB2_ERAP1	nucb2a_erap1b
5	Mac 3	L->R	Neu 2	PDGFB_ITGAV	pdgfba_itgav
5	Mac 3	L->R	Neu 2	PSAP_SORT1	psap_sort1b
5	Mac 3	L->R	Neu 2	PSEN1_NOTCH2	psen1_notch2
5	Mac 3	L->R	Neu 2	RPS19_C5AR1	rps19_CABZ01041494.1
5	Mac 3	L->R	Neu 2	S100A1_AGER	s100a1_si:ch211-79k12.1
5	Mac 3	L->R	Neu 2	SERPINE1_ITGAV	serpine1_itgav
5	Mac 3	L->R	Neu 2	TIMP2_ITGB1	timp2b_itgb1b
5	Mac 3	L->R	Neu 2	TNF_TNFRSF1A	tnfa_fas
5	Mac 3	L->R	Neu 2	TNF_TRADD	tnfa_tradd
5	Mac 3	L->R	Neu 2	TNF_TNFRSF1A	tnfb_fas
5	Mac 3	L->R	Neu 2	TNF_TRADD	tnfb_tradd
5	Mac 3	L->R	Neu 2	TNFSF13B_TFRC	tnfsf13b_tfr1b
6	Mac 4	L->R	Neu 1	ADAM10_IL6R	adam10a_il6r
6	Mac 4	L->R	Neu 1	ADAM10_NOTCH2	adam10a_notch2
6	Mac 4	L->R	Neu 1	ADAM10_TSPAN14	adam10a_tspan14
6	Mac 4	L->R	Neu 1	ADAM17_IL6R	adam17a_il6r
6	Mac 4	L->R	Neu 1	ADAM17_ITGA5	adam17a_itga5
6	Mac 4	L->R	Neu 1	ADAM28_ITGA4	adam28_itga4
6	Mac 4	L->R	Neu 1	ADAM9_ITGAV	adam9_itgav
6	Mac 4	L->R	Neu 1	AGTRAP_RACK1	agtrap_rack1
6	Mac 4	L->R	Neu 1	ALOX5AP_ALOX5	alox5ap_alox5a
6	Mac 4	L->R	Neu 1	APOE_ABCA1	apoeb_abca1a
6	Mac 4	L->R	Neu 1	APOE_ABCA1	apoeb_abca1b
6	Mac 4	L->R	Neu 1	APP_AGER	appa_si:ch211-79k12.1
6	Mac 4	L->R	Neu 1	APP_APLP2	appa_aplp2
6	Mac 4	L->R	Neu 1	APP_CD74	appa_cd74a
6	Mac 4	L->R	Neu 1	APP_CD74	appa_cd74b
6	Mac 4	L->R	Neu 1	APP_LRP10	appa_lrp10
6	Mac 4	L->R	Neu 1	APP_NOTCH2	appa_notch2
6	Mac 4	L->R	Neu 1	APP_RPSA	appa_rpsa
6	Mac 4	L->R	Neu 1	ARF6_SMAP1	arf6a_smap1
6	Mac 4	L->R	Neu 1	ARF6_SMAP1	arf6b_smap1
6	Mac 4	L->R	Neu 1	BSG_SELE	bsg_selp
6	Mac 4	L->R	Neu 1	CALM2_ABCA1	calm2a_abca1a
6	Mac 4	L->R	Neu 1	CALM2_ABCA1	calm2a_abca1b
6	Mac 4	L->R	Neu 1	CALM2_INSR	calm2a_insra
6	Mac 4	L->R	Neu 1	CALM2_KCNQ5	calm2a_kcnq5b
6	Mac 4	L->R	Neu 1	CALR_ITGAV	calr_itgav
6	Mac 4	L->R	Neu 1	CD99_CD81	cd99_cd81a
6	Mac 4	L->R	Neu 1	CNTF_IL6R	m17_il6r
6	Mac 4	L->R	Neu 1	CSF3_CSF3R	csf3a_csf3r
6	Mac 4	L->R	Neu 1	CSF3_CSF3R	csf3b_csf3r
6	Mac 4	L->R	Neu 1	CXCL9_CXCR3	BX323596.2_cxcr3.3
6	Mac 4	L->R	Neu 1	F13A1_ITGA4	f13a1b_itga4
6	Mac 4	L->R	Neu 1	F13A1_ITGA4	f13a1a.1_itga4
6	Mac 4	L->R	Neu 1	FN1_C5AR1	fn1a_CABZ01041494.1
6	Mac 4	L->R	Neu 1	FN1_ITGA4	fn1a_itga4
6	Mac 4	L->R	Neu 1	FN1_ITGA5	fn1a_itga5
6	Mac 4	L->R	Neu 1	FN1_ITGAV	fn1a_itgav
6	Mac 4	L->R	Neu 1	GNAI2_ADCY7	gnai2b_adcy7
6	Mac 4	L->R	Neu 1	GNAI2_C5AR1	gnai2b_CABZ01041494.1
6	Mac 4	L->R	Neu 1	GNAI2_CXCR3	gnai2b_cxcr3.3
6	Mac 4	L->R	Neu 1	GNAI2_S1PR4	gnai2b_s1pr4
6	Mac 4	L->R	Neu 1	GNAI2_ADCY7	gnai2a_adcy7
6	Mac 4	L->R	Neu 1	GNAI2_C5AR1	gnai2a_CABZ01041494.1
6	Mac 4	L->R	Neu 1	GNAI2_CXCR3	gnai2a_cxcr3.3
6	Mac 4	L->R	Neu 1	GNAI2_S1PR4	gnai2a_s1pr4
6	Mac 4	L->R	Neu 1	GNAS_ADCY7	gnas_adcy7
6	Mac 4	L->R	Neu 1	GNAS_CRHR1	gnas_crhr1
6	Mac 4	L->R	Neu 1	GPI_AMFR	gpia_amfra
6	Mac 4	L->R	Neu 1	GRN_SORT1	grn1_sort1b
6	Mac 4	L->R	Neu 1	GRN_TNFRSF1B	grn1_tnfrsf1b
6	Mac 4	L->R	Neu 1	GRN_SORT1	grn2_sort1b
6	Mac 4	L->R	Neu 1	GRN_TNFRSF1B	grn2_tnfrsf1b
6	Mac 4	L->R	Neu 1	HBEGF_CD82	hbegfa_cd82a
6	Mac 4	L->R	Neu 1	HBEGF_CD82	hbegfa_cd82b
6	Mac 4	L->R	Neu 1	HBEGF_CD82	hbegfb_cd82a
6	Mac 4	L->R	Neu 1	HBEGF_CD82	hbegfb_cd82b
6	Mac 4	L->R	Neu 1	HMGB1_AGER	hmgb1a_si:ch211-79k12.1
6	Mac 4	L->R	Neu 1	HMGB1_CXCR4	hmgb1a_cxcr4a
6	Mac 4	L->R	Neu 1	HMGB1_CXCR4	hmgb1a_cxcr4b
6	Mac 4	L->R	Neu 1	ICAM3_ITGB2	si:ch211-66e2.3_itgb2
6	Mac 4	L->R	Neu 1	ICAM3_ITGB2	si:ch73-208g10.1_itgb2
6	Mac 4	L->R	Neu 1	ICAM3_ITGB2	icam3_itgb2
6	Mac 4	L->R	Neu 1	IGF2_INSR	igf2b_insra
6	Mac 4	L->R	Neu 1	IL16_CD4	il16_dicp1.3-4
6	Mac 4	L->R	Neu 1	IL16_CD4	il16_dicp3.3
6	Mac 4	L->R	Neu 1	IL16_CD4	il16_dicp3.1
6	Mac 4	L->R	Neu 1	IL1B_IL1R1	il1b_CABZ01054965.1
6	Mac 4	L->R	Neu 1	IL1B_IL1R1	il1b_zmp:0000000936
6	Mac 4	L->R	Neu 1	INHBA_ACVR2A	inhbaa_acvr2aa
6	Mac 4	L->R	Neu 1	INHBA_SMAD3	inhbaa_smad3a
6	Mac 4	L->R	Neu 1	LRPAP1_SORT1	lrpap1_sort1b
6	Mac 4	L->R	Neu 1	LTF_TFRC	tfa_tfr1b
6	Mac 4	L->R	Neu 1	MFGE8_ITGAV	mfge8a_itgav
6	Mac 4	L->R	Neu 1	MFNG_NOTCH2	mfng_notch2
6	Mac 4	L->R	Neu 1	MIF_CD74	mif_cd74a
6	Mac 4	L->R	Neu 1	MIF_CD74	mif_cd74b
6	Mac 4	L->R	Neu 1	MIF_CXCR4	mif_cxcr4a
6	Mac 4	L->R	Neu 1	MIF_CXCR4	mif_cxcr4b
6	Mac 4	L->R	Neu 1	MMP9_ITGB2	mmp9_itgb2
6	Mac 4	L->R	Neu 1	NAMPT_INSR	nampta_insra
6	Mac 4	L->R	Neu 1	NUCB2_ERAP1	nucb2a_erap1b
6	Mac 4	L->R	Neu 1	NUCB2_ERAP1	nucb2b_erap1b
6	Mac 4	L->R	Neu 1	PDGFB_ITGAV	pdgfba_itgav
6	Mac 4	L->R	Neu 1	PSAP_SORT1	psap_sort1b
6	Mac 4	L->R	Neu 1	PSEN1_NOTCH2	psen1_notch2
6	Mac 4	L->R	Neu 1	PTGS2_ALOX5	ptgs2a_alox5a
6	Mac 4	L->R	Neu 1	RPS19_C5AR1	rps19_CABZ01041494.1
6	Mac 4	L->R	Neu 1	SERPINE1_ITGAV	serpine1_itgav
6	Mac 4	L->R	Neu 1	TNF_TNFRSF1B	tnfa_tnfrsf1b
6	Mac 4	L->R	Neu 1	TNF_TRADD	tnfa_tradd
6	Mac 4	L->R	Neu 1	TNF_TNFRSF1B	tnfb_tnfrsf1b
6	Mac 4	L->R	Neu 1	TNF_TRADD	tnfb_tradd
6	Mac 4	L->R	Neu 1	TNFSF13B_TFRC	tnfsf13b_tfr1b
7	Mac 4	L->R	Neu 2	ADAM10_IL6R	adam10a_il6r
7	Mac 4	L->R	Neu 2	ADAM10_NOTCH2	adam10a_notch2
7	Mac 4	L->R	Neu 2	ADAM10_TSPAN14	adam10a_tspan14
7	Mac 4	L->R	Neu 2	ADAM17_IL6R	adam17a_il6r
7	Mac 4	L->R	Neu 2	ADAM17_ITGA5	adam17a_itga5
7	Mac 4	L->R	Neu 2	ADAM17_ITGB1	adam17a_itgb1b
7	Mac 4	L->R	Neu 2	ADAM28_ITGA4	adam28_itga4
7	Mac 4	L->R	Neu 2	ADAM9_ITGAV	adam9_itgav
7	Mac 4	L->R	Neu 2	ADAM9_ITGB1	adam9_itgb1b
7	Mac 4	L->R	Neu 2	AGTRAP_RACK1	agtrap_rack1
7	Mac 4	L->R	Neu 2	ALOX5AP_ALOX5	alox5ap_alox5a
7	Mac 4	L->R	Neu 2	APOE_ABCA1	apoeb_abca1a
7	Mac 4	L->R	Neu 2	APOE_ABCA1	apoeb_abca1b
7	Mac 4	L->R	Neu 2	APP_AGER	appa_si:ch211-79k12.1
7	Mac 4	L->R	Neu 2	APP_APLP2	appa_aplp2
7	Mac 4	L->R	Neu 2	APP_CD74	appa_cd74a
7	Mac 4	L->R	Neu 2	APP_CD74	appa_cd74b
7	Mac 4	L->R	Neu 2	APP_LRP10	appa_lrp10
7	Mac 4	L->R	Neu 2	APP_NOTCH2	appa_notch2
7	Mac 4	L->R	Neu 2	APP_RPSA	appa_rpsa
7	Mac 4	L->R	Neu 2	ARF6_SMAP1	arf6a_smap1
7	Mac 4	L->R	Neu 2	ARF6_SMAP1	arf6b_smap1
7	Mac 4	L->R	Neu 2	BSG_SELE	bsg_selp
7	Mac 4	L->R	Neu 2	CALM2_ABCA1	calm2a_abca1a
7	Mac 4	L->R	Neu 2	CALM2_ABCA1	calm2a_abca1b
7	Mac 4	L->R	Neu 2	CALM2_INSR	calm2a_insra
7	Mac 4	L->R	Neu 2	CALM2_KCNQ5	calm2a_kcnq5b
7	Mac 4	L->R	Neu 2	CALR_ITGAV	calr_itgav
7	Mac 4	L->R	Neu 2	CD99_CD81	cd99_cd81a
7	Mac 4	L->R	Neu 2	CNTF_IL6R	m17_il6r
7	Mac 4	L->R	Neu 2	CSF3_CSF3R	csf3a_csf3r
7	Mac 4	L->R	Neu 2	CSF3_CSF3R	csf3b_csf3r
7	Mac 4	L->R	Neu 2	CXCL9_CXCR3	BX323596.2_cxcr3.3
7	Mac 4	L->R	Neu 2	F13A1_ITGA4	f13a1b_itga4
7	Mac 4	L->R	Neu 2	F13A1_ITGB1	f13a1b_itgb1b
7	Mac 4	L->R	Neu 2	F13A1_ITGA4	f13a1a.1_itga4
7	Mac 4	L->R	Neu 2	F13A1_ITGB1	f13a1a.1_itgb1b
7	Mac 4	L->R	Neu 2	FN1_C5AR1	fn1a_CABZ01041494.1
7	Mac 4	L->R	Neu 2	FN1_ITGA4	fn1a_itga4
7	Mac 4	L->R	Neu 2	FN1_ITGA5	fn1a_itga5
7	Mac 4	L->R	Neu 2	FN1_ITGAV	fn1a_itgav
7	Mac 4	L->R	Neu 2	FN1_ITGB1	fn1a_itgb1b
7	Mac 4	L->R	Neu 2	GNAI2_ADCY7	gnai2b_adcy7
7	Mac 4	L->R	Neu 2	GNAI2_C5AR1	gnai2b_CABZ01041494.1
7	Mac 4	L->R	Neu 2	GNAI2_CXCR3	gnai2b_cxcr3.3
7	Mac 4	L->R	Neu 2	GNAI2_S1PR4	gnai2b_s1pr4
7	Mac 4	L->R	Neu 2	GNAI2_ADCY7	gnai2a_adcy7
7	Mac 4	L->R	Neu 2	GNAI2_C5AR1	gnai2a_CABZ01041494.1
7	Mac 4	L->R	Neu 2	GNAI2_CXCR3	gnai2a_cxcr3.3
7	Mac 4	L->R	Neu 2	GNAI2_S1PR4	gnai2a_s1pr4
7	Mac 4	L->R	Neu 2	GNAS_ADCY7	gnas_adcy7
7	Mac 4	L->R	Neu 2	GNAS_CRHR1	gnas_crhr1
7	Mac 4	L->R	Neu 2	GPI_AMFR	gpia_amfra
7	Mac 4	L->R	Neu 2	GRN_SORT1	grn1_sort1b
7	Mac 4	L->R	Neu 2	GRN_TNFRSF1A	grn1_fas
7	Mac 4	L->R	Neu 2	GRN_SORT1	grn2_sort1b
7	Mac 4	L->R	Neu 2	GRN_TNFRSF1A	grn2_fas
7	Mac 4	L->R	Neu 2	HBEGF_CD82	hbegfa_cd82a
7	Mac 4	L->R	Neu 2	HBEGF_CD82	hbegfa_cd82b
7	Mac 4	L->R	Neu 2	HBEGF_CD82	hbegfb_cd82a
7	Mac 4	L->R	Neu 2	HBEGF_CD82	hbegfb_cd82b
7	Mac 4	L->R	Neu 2	HMGB1_AGER	hmgb1a_si:ch211-79k12.1
7	Mac 4	L->R	Neu 2	HMGB1_CXCR4	hmgb1a_cxcr4a
7	Mac 4	L->R	Neu 2	HMGB1_CXCR4	hmgb1a_cxcr4b
7	Mac 4	L->R	Neu 2	ICAM3_ITGB2	si:ch211-66e2.3_itgb2
7	Mac 4	L->R	Neu 2	ICAM3_ITGB2	si:ch73-208g10.1_itgb2
7	Mac 4	L->R	Neu 2	ICAM3_ITGB2	icam3_itgb2
7	Mac 4	L->R	Neu 2	IGF2_INSR	igf2b_insra
7	Mac 4	L->R	Neu 2	IL16_CD4	il16_dicp1.3-4
7	Mac 4	L->R	Neu 2	IL16_CD4	il16_dicp3.3
7	Mac 4	L->R	Neu 2	IL16_CD4	il16_dicp3.1
7	Mac 4	L->R	Neu 2	IL16_CD4	il16_dicp2.2
7	Mac 4	L->R	Neu 2	IL1B_IL1R1	il1b_CABZ01054965.1
7	Mac 4	L->R	Neu 2	INHBA_ACVR2A	inhbaa_acvr2aa
7	Mac 4	L->R	Neu 2	INHBA_SMAD3	inhbaa_smad3a
7	Mac 4	L->R	Neu 2	LRPAP1_SORT1	lrpap1_sort1b
7	Mac 4	L->R	Neu 2	LTF_TFRC	tfa_tfr1b
7	Mac 4	L->R	Neu 2	MFGE8_ITGAV	mfge8a_itgav
7	Mac 4	L->R	Neu 2	MFNG_NOTCH2	mfng_notch2
7	Mac 4	L->R	Neu 2	MIF_CD74	mif_cd74a
7	Mac 4	L->R	Neu 2	MIF_CD74	mif_cd74b
7	Mac 4	L->R	Neu 2	MIF_CXCR4	mif_cxcr4a
7	Mac 4	L->R	Neu 2	MIF_CXCR4	mif_cxcr4b
7	Mac 4	L->R	Neu 2	MMP9_ITGB2	mmp9_itgb2
7	Mac 4	L->R	Neu 2	NAMPT_INSR	nampta_insra
7	Mac 4	L->R	Neu 2	NUCB2_ERAP1	nucb2a_erap1b
7	Mac 4	L->R	Neu 2	NUCB2_ERAP1	nucb2b_erap1b
7	Mac 4	L->R	Neu 2	PDGFB_ITGAV	pdgfba_itgav
7	Mac 4	L->R	Neu 2	PSAP_SORT1	psap_sort1b
7	Mac 4	L->R	Neu 2	PSEN1_NOTCH2	psen1_notch2
7	Mac 4	L->R	Neu 2	PTGS2_ALOX5	ptgs2a_alox5a
7	Mac 4	L->R	Neu 2	RPS19_C5AR1	rps19_CABZ01041494.1
7	Mac 4	L->R	Neu 2	SERPINE1_ITGAV	serpine1_itgav
7	Mac 4	L->R	Neu 2	TIMP2_ITGB1	timp2b_itgb1b
7	Mac 4	L->R	Neu 2	TNF_TNFRSF1A	tnfa_fas
7	Mac 4	L->R	Neu 2	TNF_TRADD	tnfa_tradd
7	Mac 4	L->R	Neu 2	TNF_TNFRSF1A	tnfb_fas
7	Mac 4	L->R	Neu 2	TNF_TRADD	tnfb_tradd
7	Mac 4	L->R	Neu 2	TNFSF13B_TFRC	tnfsf13b_tfr1b
8	Mac 5	L->R	Neu 1	ADAM10_IL6R	adam10a_il6r
8	Mac 5	L->R	Neu 1	ADAM10_NOTCH2	adam10a_notch2
8	Mac 5	L->R	Neu 1	ADAM10_TSPAN14	adam10a_tspan14
8	Mac 5	L->R	Neu 1	ADAM17_IL6R	adam17a_il6r
8	Mac 5	L->R	Neu 1	ADAM17_ITGA5	adam17a_itga5
8	Mac 5	L->R	Neu 1	ADAM9_ITGAV	adam9_itgav
8	Mac 5	L->R	Neu 1	AGTRAP_RACK1	agtrap_rack1
8	Mac 5	L->R	Neu 1	ALOX5AP_ALOX5	alox5ap_alox5a
8	Mac 5	L->R	Neu 1	APOE_ABCA1	apoeb_abca1a
8	Mac 5	L->R	Neu 1	APOE_ABCA1	apoeb_abca1b
8	Mac 5	L->R	Neu 1	APP_AGER	appa_si:ch211-79k12.1
8	Mac 5	L->R	Neu 1	APP_APLP2	appa_aplp2
8	Mac 5	L->R	Neu 1	APP_CD74	appa_cd74a
8	Mac 5	L->R	Neu 1	APP_CD74	appa_cd74b
8	Mac 5	L->R	Neu 1	APP_LRP10	appa_lrp10
8	Mac 5	L->R	Neu 1	APP_NOTCH2	appa_notch2
8	Mac 5	L->R	Neu 1	APP_RPSA	appa_rpsa
8	Mac 5	L->R	Neu 1	ARF6_SMAP1	arf6a_smap1
8	Mac 5	L->R	Neu 1	ARF6_SMAP1	arf6b_smap1
8	Mac 5	L->R	Neu 1	BSG_SELE	bsg_selp
8	Mac 5	L->R	Neu 1	CALM2_ABCA1	calm3a_abca1a
8	Mac 5	L->R	Neu 1	CALM2_ABCA1	calm3a_abca1b
8	Mac 5	L->R	Neu 1	CALM2_INSR	calm3a_insra
8	Mac 5	L->R	Neu 1	CALM2_KCNQ5	calm3a_kcnq5b
8	Mac 5	L->R	Neu 1	CALM2_ABCA1	calm2a_abca1a
8	Mac 5	L->R	Neu 1	CALM2_ABCA1	calm2a_abca1b
8	Mac 5	L->R	Neu 1	CALM2_INSR	calm2a_insra
8	Mac 5	L->R	Neu 1	CALM2_KCNQ5	calm2a_kcnq5b
8	Mac 5	L->R	Neu 1	CALR_ITGAV	calr_itgav
8	Mac 5	L->R	Neu 1	CD99_CD81	cd99_cd81a
8	Mac 5	L->R	Neu 1	CNTF_IL6R	m17_il6r
8	Mac 5	L->R	Neu 1	CSF3_CSF3R	csf3a_csf3r
8	Mac 5	L->R	Neu 1	CSF3_CSF3R	csf3b_csf3r
8	Mac 5	L->R	Neu 1	CXCL9_CXCR3	BX323596.1_cxcr3.3
8	Mac 5	L->R	Neu 1	CXCL9_CXCR3	BX323596.2_cxcr3.3
8	Mac 5	L->R	Neu 1	F13A1_ITGA4	f13a1b_itga4
8	Mac 5	L->R	Neu 1	FN1_C5AR1	fn1a_CABZ01041494.1
8	Mac 5	L->R	Neu 1	FN1_ITGA4	fn1a_itga4
8	Mac 5	L->R	Neu 1	FN1_ITGA5	fn1a_itga5
8	Mac 5	L->R	Neu 1	FN1_ITGAV	fn1a_itgav
8	Mac 5	L->R	Neu 1	GNAI2_ADCY7	gnai2b_adcy7
8	Mac 5	L->R	Neu 1	GNAI2_C5AR1	gnai2b_CABZ01041494.1
8	Mac 5	L->R	Neu 1	GNAI2_CXCR3	gnai2b_cxcr3.3
8	Mac 5	L->R	Neu 1	GNAI2_S1PR4	gnai2b_s1pr4
8	Mac 5	L->R	Neu 1	GNAI2_ADCY7	gnai2a_adcy7
8	Mac 5	L->R	Neu 1	GNAI2_C5AR1	gnai2a_CABZ01041494.1
8	Mac 5	L->R	Neu 1	GNAI2_CXCR3	gnai2a_cxcr3.3
8	Mac 5	L->R	Neu 1	GNAI2_S1PR4	gnai2a_s1pr4
8	Mac 5	L->R	Neu 1	GNAS_ADCY7	gnas_adcy7
8	Mac 5	L->R	Neu 1	GNAS_CRHR1	gnas_crhr1
8	Mac 5	L->R	Neu 1	GPI_AMFR	gpia_amfra
8	Mac 5	L->R	Neu 1	GRN_SORT1	grn1_sort1b
8	Mac 5	L->R	Neu 1	GRN_TNFRSF1B	grn1_tnfrsf1b
8	Mac 5	L->R	Neu 1	GRN_SORT1	grn2_sort1b
8	Mac 5	L->R	Neu 1	GRN_TNFRSF1B	grn2_tnfrsf1b
8	Mac 5	L->R	Neu 1	HBEGF_CD82	hbegfa_cd82a
8	Mac 5	L->R	Neu 1	HBEGF_CD82	hbegfa_cd82b
8	Mac 5	L->R	Neu 1	HBEGF_CD82	hbegfb_cd82a
8	Mac 5	L->R	Neu 1	HBEGF_CD82	hbegfb_cd82b
8	Mac 5	L->R	Neu 1	HMGB1_AGER	hmgb1b_si:ch211-79k12.1
8	Mac 5	L->R	Neu 1	HMGB1_CXCR4	hmgb1b_cxcr4a
8	Mac 5	L->R	Neu 1	HMGB1_CXCR4	hmgb1b_cxcr4b
8	Mac 5	L->R	Neu 1	HMGB1_AGER	hmgb1a_si:ch211-79k12.1
8	Mac 5	L->R	Neu 1	HMGB1_CXCR4	hmgb1a_cxcr4a
8	Mac 5	L->R	Neu 1	HMGB1_CXCR4	hmgb1a_cxcr4b
8	Mac 5	L->R	Neu 1	ICAM3_ITGB2	si:ch211-66e2.3_itgb2
8	Mac 5	L->R	Neu 1	ICAM3_ITGB2	si:ch73-208g10.1_itgb2
8	Mac 5	L->R	Neu 1	ICAM3_ITGB2	icam3_itgb2
8	Mac 5	L->R	Neu 1	IGF2_INSR	igf2b_insra
8	Mac 5	L->R	Neu 1	IL16_CD4	il16_dicp1.3-4
8	Mac 5	L->R	Neu 1	IL16_CD4	il16_dicp3.3
8	Mac 5	L->R	Neu 1	IL16_CD4	il16_dicp3.1
8	Mac 5	L->R	Neu 1	IL1B_IL1R1	il1b_CABZ01054965.1
8	Mac 5	L->R	Neu 1	IL1B_IL1R1	il1b_zmp:0000000936
8	Mac 5	L->R	Neu 1	INHBA_ACVR2A	inhbaa_acvr2aa
8	Mac 5	L->R	Neu 1	INHBA_SMAD3	inhbaa_smad3a
8	Mac 5	L->R	Neu 1	LRPAP1_SORT1	lrpap1_sort1b
8	Mac 5	L->R	Neu 1	MFNG_NOTCH2	mfng_notch2
8	Mac 5	L->R	Neu 1	MIF_CD74	mif_cd74a
8	Mac 5	L->R	Neu 1	MIF_CD74	mif_cd74b
8	Mac 5	L->R	Neu 1	MIF_CXCR4	mif_cxcr4a
8	Mac 5	L->R	Neu 1	MIF_CXCR4	mif_cxcr4b
8	Mac 5	L->R	Neu 1	MMP9_ITGB2	mmp9_itgb2
8	Mac 5	L->R	Neu 1	NUCB2_ERAP1	nucb2a_erap1b
8	Mac 5	L->R	Neu 1	NUCB2_ERAP1	nucb2b_erap1b
8	Mac 5	L->R	Neu 1	PDGFB_ITGAV	pdgfba_itgav
8	Mac 5	L->R	Neu 1	PSAP_SORT1	psap_sort1b
8	Mac 5	L->R	Neu 1	PSEN1_NOTCH2	psen1_notch2
8	Mac 5	L->R	Neu 1	RPS19_C5AR1	rps19_CABZ01041494.1
8	Mac 5	L->R	Neu 1	SERPINE1_ITGAV	serpine1_itgav
8	Mac 5	L->R	Neu 1	TNF_TNFRSF1B	tnfb_tnfrsf1b
8	Mac 5	L->R	Neu 1	TNF_TRADD	tnfb_tradd
8	Mac 5	L->R	Neu 1	TNFSF13B_TFRC	tnfsf13b_tfr1b
9	Mac 5	L->R	Neu 2	ADAM10_IL6R	adam10a_il6r
9	Mac 5	L->R	Neu 2	ADAM10_NOTCH2	adam10a_notch2
9	Mac 5	L->R	Neu 2	ADAM10_TSPAN14	adam10a_tspan14
9	Mac 5	L->R	Neu 2	ADAM17_IL6R	adam17a_il6r
9	Mac 5	L->R	Neu 2	ADAM17_ITGA5	adam17a_itga5
9	Mac 5	L->R	Neu 2	ADAM17_ITGB1	adam17a_itgb1b
9	Mac 5	L->R	Neu 2	ADAM9_ITGAV	adam9_itgav
9	Mac 5	L->R	Neu 2	ADAM9_ITGB1	adam9_itgb1b
9	Mac 5	L->R	Neu 2	AGTRAP_RACK1	agtrap_rack1
9	Mac 5	L->R	Neu 2	ALOX5AP_ALOX5	alox5ap_alox5a
9	Mac 5	L->R	Neu 2	APOE_ABCA1	apoeb_abca1a
9	Mac 5	L->R	Neu 2	APOE_ABCA1	apoeb_abca1b
9	Mac 5	L->R	Neu 2	APP_AGER	appa_si:ch211-79k12.1
9	Mac 5	L->R	Neu 2	APP_APLP2	appa_aplp2
9	Mac 5	L->R	Neu 2	APP_CD74	appa_cd74a
9	Mac 5	L->R	Neu 2	APP_CD74	appa_cd74b
9	Mac 5	L->R	Neu 2	APP_LRP10	appa_lrp10
9	Mac 5	L->R	Neu 2	APP_NOTCH2	appa_notch2
9	Mac 5	L->R	Neu 2	APP_RPSA	appa_rpsa
9	Mac 5	L->R	Neu 2	ARF6_SMAP1	arf6a_smap1
9	Mac 5	L->R	Neu 2	ARF6_SMAP1	arf6b_smap1
9	Mac 5	L->R	Neu 2	BSG_SELE	bsg_selp
9	Mac 5	L->R	Neu 2	CALM2_ABCA1	calm3a_abca1a
9	Mac 5	L->R	Neu 2	CALM2_ABCA1	calm3a_abca1b
9	Mac 5	L->R	Neu 2	CALM2_INSR	calm3a_insra
9	Mac 5	L->R	Neu 2	CALM2_KCNQ5	calm3a_kcnq5b
9	Mac 5	L->R	Neu 2	CALM2_ABCA1	calm2a_abca1a
9	Mac 5	L->R	Neu 2	CALM2_ABCA1	calm2a_abca1b
9	Mac 5	L->R	Neu 2	CALM2_INSR	calm2a_insra
9	Mac 5	L->R	Neu 2	CALM2_KCNQ5	calm2a_kcnq5b
9	Mac 5	L->R	Neu 2	CALR_ITGAV	calr_itgav
9	Mac 5	L->R	Neu 2	CD99_CD81	cd99_cd81a
9	Mac 5	L->R	Neu 2	CNTF_IL6R	m17_il6r
9	Mac 5	L->R	Neu 2	CSF3_CSF3R	csf3a_csf3r
9	Mac 5	L->R	Neu 2	CSF3_CSF3R	csf3b_csf3r
9	Mac 5	L->R	Neu 2	CXCL9_CXCR3	BX323596.1_cxcr3.3
9	Mac 5	L->R	Neu 2	CXCL9_CXCR3	BX323596.2_cxcr3.3
9	Mac 5	L->R	Neu 2	F13A1_ITGA4	f13a1b_itga4
9	Mac 5	L->R	Neu 2	F13A1_ITGB1	f13a1b_itgb1b
9	Mac 5	L->R	Neu 2	FN1_C5AR1	fn1a_CABZ01041494.1
9	Mac 5	L->R	Neu 2	FN1_ITGA4	fn1a_itga4
9	Mac 5	L->R	Neu 2	FN1_ITGA5	fn1a_itga5
9	Mac 5	L->R	Neu 2	FN1_ITGAV	fn1a_itgav
9	Mac 5	L->R	Neu 2	FN1_ITGB1	fn1a_itgb1b
9	Mac 5	L->R	Neu 2	GNAI2_ADCY7	gnai2b_adcy7
9	Mac 5	L->R	Neu 2	GNAI2_C5AR1	gnai2b_CABZ01041494.1
9	Mac 5	L->R	Neu 2	GNAI2_CXCR3	gnai2b_cxcr3.3
9	Mac 5	L->R	Neu 2	GNAI2_S1PR4	gnai2b_s1pr4
9	Mac 5	L->R	Neu 2	GNAI2_ADCY7	gnai2a_adcy7
9	Mac 5	L->R	Neu 2	GNAI2_C5AR1	gnai2a_CABZ01041494.1
9	Mac 5	L->R	Neu 2	GNAI2_CXCR3	gnai2a_cxcr3.3
9	Mac 5	L->R	Neu 2	GNAI2_S1PR4	gnai2a_s1pr4
9	Mac 5	L->R	Neu 2	GNAS_ADCY7	gnas_adcy7
9	Mac 5	L->R	Neu 2	GNAS_CRHR1	gnas_crhr1
9	Mac 5	L->R	Neu 2	GPI_AMFR	gpia_amfra
9	Mac 5	L->R	Neu 2	GRN_SORT1	grn1_sort1b
9	Mac 5	L->R	Neu 2	GRN_TNFRSF1A	grn1_fas
9	Mac 5	L->R	Neu 2	GRN_SORT1	grn2_sort1b
9	Mac 5	L->R	Neu 2	GRN_TNFRSF1A	grn2_fas
9	Mac 5	L->R	Neu 2	HBEGF_CD82	hbegfa_cd82a
9	Mac 5	L->R	Neu 2	HBEGF_CD82	hbegfa_cd82b
9	Mac 5	L->R	Neu 2	HBEGF_CD82	hbegfb_cd82a
9	Mac 5	L->R	Neu 2	HBEGF_CD82	hbegfb_cd82b
9	Mac 5	L->R	Neu 2	HMGB1_AGER	hmgb1b_si:ch211-79k12.1
9	Mac 5	L->R	Neu 2	HMGB1_CXCR4	hmgb1b_cxcr4a
9	Mac 5	L->R	Neu 2	HMGB1_CXCR4	hmgb1b_cxcr4b
9	Mac 5	L->R	Neu 2	HMGB1_AGER	hmgb1a_si:ch211-79k12.1
9	Mac 5	L->R	Neu 2	HMGB1_CXCR4	hmgb1a_cxcr4a
9	Mac 5	L->R	Neu 2	HMGB1_CXCR4	hmgb1a_cxcr4b
9	Mac 5	L->R	Neu 2	ICAM3_ITGB2	si:ch211-66e2.3_itgb2
9	Mac 5	L->R	Neu 2	ICAM3_ITGB2	si:ch73-208g10.1_itgb2
9	Mac 5	L->R	Neu 2	ICAM3_ITGB2	icam3_itgb2
9	Mac 5	L->R	Neu 2	IGF2_INSR	igf2b_insra
9	Mac 5	L->R	Neu 2	IL16_CD4	il16_dicp1.3-4
9	Mac 5	L->R	Neu 2	IL16_CD4	il16_dicp3.3
9	Mac 5	L->R	Neu 2	IL16_CD4	il16_dicp3.1
9	Mac 5	L->R	Neu 2	IL16_CD4	il16_dicp2.2
9	Mac 5	L->R	Neu 2	IL1B_IL1R1	il1b_CABZ01054965.1
9	Mac 5	L->R	Neu 2	INHBA_ACVR2A	inhbaa_acvr2aa
9	Mac 5	L->R	Neu 2	INHBA_SMAD3	inhbaa_smad3a
9	Mac 5	L->R	Neu 2	LRPAP1_SORT1	lrpap1_sort1b
9	Mac 5	L->R	Neu 2	MFNG_NOTCH2	mfng_notch2
9	Mac 5	L->R	Neu 2	MIF_CD74	mif_cd74a
9	Mac 5	L->R	Neu 2	MIF_CD74	mif_cd74b
9	Mac 5	L->R	Neu 2	MIF_CXCR4	mif_cxcr4a
9	Mac 5	L->R	Neu 2	MIF_CXCR4	mif_cxcr4b
9	Mac 5	L->R	Neu 2	MMP9_ITGB2	mmp9_itgb2
9	Mac 5	L->R	Neu 2	NUCB2_ERAP1	nucb2a_erap1b
9	Mac 5	L->R	Neu 2	NUCB2_ERAP1	nucb2b_erap1b
9	Mac 5	L->R	Neu 2	PDGFB_ITGAV	pdgfba_itgav
9	Mac 5	L->R	Neu 2	PSAP_SORT1	psap_sort1b
9	Mac 5	L->R	Neu 2	PSEN1_NOTCH2	psen1_notch2
9	Mac 5	L->R	Neu 2	RPS19_C5AR1	rps19_CABZ01041494.1
9	Mac 5	L->R	Neu 2	SERPINE1_ITGAV	serpine1_itgav
9	Mac 5	L->R	Neu 2	TIMP2_ITGB1	timp2b_itgb1b
9	Mac 5	L->R	Neu 2	TNF_TNFRSF1A	tnfb_fas
9	Mac 5	L->R	Neu 2	TNF_TRADD	tnfb_tradd
9	Mac 5	L->R	Neu 2	TNFSF13B_TFRC	tnfsf13b_tfr1b
10	Mac 6	L->R	Neu 1	ADAM10_IL6R	adam10a_il6r
10	Mac 6	L->R	Neu 1	ADAM10_NOTCH2	adam10a_notch2
10	Mac 6	L->R	Neu 1	ADAM10_TSPAN14	adam10a_tspan14
10	Mac 6	L->R	Neu 1	ADAM17_IL6R	adam17a_il6r
10	Mac 6	L->R	Neu 1	ADAM17_ITGA5	adam17a_itga5
10	Mac 6	L->R	Neu 1	ADAM28_ITGA4	adam28_itga4
10	Mac 6	L->R	Neu 1	ADAM9_ITGAV	adam9_itgav
10	Mac 6	L->R	Neu 1	AGTRAP_RACK1	agtrap_rack1
10	Mac 6	L->R	Neu 1	ALOX5AP_ALOX5	alox5ap_alox5a
10	Mac 6	L->R	Neu 1	APOE_ABCA1	apoeb_abca1a
10	Mac 6	L->R	Neu 1	APOE_ABCA1	apoeb_abca1b
10	Mac 6	L->R	Neu 1	APP_AGER	appa_si:ch211-79k12.1
10	Mac 6	L->R	Neu 1	APP_APLP2	appa_aplp2
10	Mac 6	L->R	Neu 1	APP_CD74	appa_cd74a
10	Mac 6	L->R	Neu 1	APP_CD74	appa_cd74b
10	Mac 6	L->R	Neu 1	APP_LRP10	appa_lrp10
10	Mac 6	L->R	Neu 1	APP_NOTCH2	appa_notch2
10	Mac 6	L->R	Neu 1	APP_RPSA	appa_rpsa
10	Mac 6	L->R	Neu 1	ARF6_SMAP1	arf6a_smap1
10	Mac 6	L->R	Neu 1	ARF6_SMAP1	arf6b_smap1
10	Mac 6	L->R	Neu 1	BSG_SELE	bsg_selp
10	Mac 6	L->R	Neu 1	CALM2_ABCA1	calm2a_abca1a
10	Mac 6	L->R	Neu 1	CALM2_ABCA1	calm2a_abca1b
10	Mac 6	L->R	Neu 1	CALM2_INSR	calm2a_insra
10	Mac 6	L->R	Neu 1	CALM2_KCNQ5	calm2a_kcnq5b
10	Mac 6	L->R	Neu 1	CALR_ITGAV	calr_itgav
10	Mac 6	L->R	Neu 1	CD99_CD81	cd99_cd81a
10	Mac 6	L->R	Neu 1	CNTF_IL6R	m17_il6r
10	Mac 6	L->R	Neu 1	CSF3_CSF3R	csf3a_csf3r
10	Mac 6	L->R	Neu 1	CSF3_CSF3R	csf3b_csf3r
10	Mac 6	L->R	Neu 1	CXCL9_CXCR3	BX323596.1_cxcr3.3
10	Mac 6	L->R	Neu 1	CXCL9_CXCR3	BX323596.2_cxcr3.3
10	Mac 6	L->R	Neu 1	F13A1_ITGA4	f13a1b_itga4
10	Mac 6	L->R	Neu 1	FN1_C5AR1	fn1a_CABZ01041494.1
10	Mac 6	L->R	Neu 1	FN1_ITGA4	fn1a_itga4
10	Mac 6	L->R	Neu 1	FN1_ITGA5	fn1a_itga5
10	Mac 6	L->R	Neu 1	FN1_ITGAV	fn1a_itgav
10	Mac 6	L->R	Neu 1	GNAI2_ADCY7	gnai2b_adcy7
10	Mac 6	L->R	Neu 1	GNAI2_C5AR1	gnai2b_CABZ01041494.1
10	Mac 6	L->R	Neu 1	GNAI2_CXCR3	gnai2b_cxcr3.3
10	Mac 6	L->R	Neu 1	GNAI2_S1PR4	gnai2b_s1pr4
10	Mac 6	L->R	Neu 1	GNAI2_ADCY7	gnai2a_adcy7
10	Mac 6	L->R	Neu 1	GNAI2_C5AR1	gnai2a_CABZ01041494.1
10	Mac 6	L->R	Neu 1	GNAI2_CXCR3	gnai2a_cxcr3.3
10	Mac 6	L->R	Neu 1	GNAI2_S1PR4	gnai2a_s1pr4
10	Mac 6	L->R	Neu 1	GNAS_ADCY7	gnas_adcy7
10	Mac 6	L->R	Neu 1	GNAS_CRHR1	gnas_crhr1
10	Mac 6	L->R	Neu 1	GPI_AMFR	gpia_amfra
10	Mac 6	L->R	Neu 1	GRN_SORT1	grn1_sort1b
10	Mac 6	L->R	Neu 1	GRN_TNFRSF1B	grn1_tnfrsf1b
10	Mac 6	L->R	Neu 1	GRN_SORT1	grn2_sort1b
10	Mac 6	L->R	Neu 1	GRN_TNFRSF1B	grn2_tnfrsf1b
10	Mac 6	L->R	Neu 1	HBEGF_CD82	hbegfa_cd82a
10	Mac 6	L->R	Neu 1	HBEGF_CD82	hbegfa_cd82b
10	Mac 6	L->R	Neu 1	HBEGF_CD82	hbegfb_cd82a
10	Mac 6	L->R	Neu 1	HBEGF_CD82	hbegfb_cd82b
10	Mac 6	L->R	Neu 1	HMGB1_AGER	hmgb1a_si:ch211-79k12.1
10	Mac 6	L->R	Neu 1	HMGB1_CXCR4	hmgb1a_cxcr4a
10	Mac 6	L->R	Neu 1	HMGB1_CXCR4	hmgb1a_cxcr4b
10	Mac 6	L->R	Neu 1	ICAM3_ITGB2	si:ch211-66e2.3_itgb2
10	Mac 6	L->R	Neu 1	ICAM3_ITGB2	si:ch73-208g10.1_itgb2
10	Mac 6	L->R	Neu 1	ICAM3_ITGB2	icam3_itgb2
10	Mac 6	L->R	Neu 1	IGF2_INSR	igf2b_insra
10	Mac 6	L->R	Neu 1	IL16_CD4	il16_dicp1.3-4
10	Mac 6	L->R	Neu 1	IL16_CD4	il16_dicp3.3
10	Mac 6	L->R	Neu 1	IL16_CD4	il16_dicp3.1
10	Mac 6	L->R	Neu 1	IL1B_IL1R1	il1b_CABZ01054965.1
10	Mac 6	L->R	Neu 1	IL1B_IL1R1	il1b_zmp:0000000936
10	Mac 6	L->R	Neu 1	INHBA_ACVR2A	inhbaa_acvr2aa
10	Mac 6	L->R	Neu 1	INHBA_SMAD3	inhbaa_smad3a
10	Mac 6	L->R	Neu 1	LRPAP1_SORT1	lrpap1_sort1b
10	Mac 6	L->R	Neu 1	LTF_TFRC	tfa_tfr1b
10	Mac 6	L->R	Neu 1	MFNG_NOTCH2	mfng_notch2
10	Mac 6	L->R	Neu 1	MIF_CD74	mif_cd74a
10	Mac 6	L->R	Neu 1	MIF_CD74	mif_cd74b
10	Mac 6	L->R	Neu 1	MIF_CXCR4	mif_cxcr4a
10	Mac 6	L->R	Neu 1	MIF_CXCR4	mif_cxcr4b
10	Mac 6	L->R	Neu 1	MMP9_ITGB2	mmp9_itgb2
10	Mac 6	L->R	Neu 1	NAMPT_INSR	nampta_insra
10	Mac 6	L->R	Neu 1	NUCB2_ERAP1	nucb2a_erap1b
10	Mac 6	L->R	Neu 1	NUCB2_ERAP1	nucb2b_erap1b
10	Mac 6	L->R	Neu 1	PDGFB_ITGAV	pdgfba_itgav
10	Mac 6	L->R	Neu 1	PSAP_SORT1	psap_sort1b
10	Mac 6	L->R	Neu 1	PSEN1_NOTCH2	psen1_notch2
10	Mac 6	L->R	Neu 1	RPS19_C5AR1	rps19_CABZ01041494.1
10	Mac 6	L->R	Neu 1	SERPINE1_ITGAV	serpine1_itgav
10	Mac 6	L->R	Neu 1	TNF_TNFRSF1B	tnfb_tnfrsf1b
10	Mac 6	L->R	Neu 1	TNF_TRADD	tnfb_tradd
11	Mac 6	L->R	Neu 2	ADAM10_IL6R	adam10a_il6r
11	Mac 6	L->R	Neu 2	ADAM10_NOTCH2	adam10a_notch2
11	Mac 6	L->R	Neu 2	ADAM10_TSPAN14	adam10a_tspan14
11	Mac 6	L->R	Neu 2	ADAM17_IL6R	adam17a_il6r
11	Mac 6	L->R	Neu 2	ADAM17_ITGA5	adam17a_itga5
11	Mac 6	L->R	Neu 2	ADAM17_ITGB1	adam17a_itgb1b
11	Mac 6	L->R	Neu 2	ADAM28_ITGA4	adam28_itga4
11	Mac 6	L->R	Neu 2	ADAM9_ITGAV	adam9_itgav
11	Mac 6	L->R	Neu 2	ADAM9_ITGB1	adam9_itgb1b
11	Mac 6	L->R	Neu 2	AGTRAP_RACK1	agtrap_rack1
11	Mac 6	L->R	Neu 2	ALOX5AP_ALOX5	alox5ap_alox5a
11	Mac 6	L->R	Neu 2	APOE_ABCA1	apoeb_abca1a
11	Mac 6	L->R	Neu 2	APOE_ABCA1	apoeb_abca1b
11	Mac 6	L->R	Neu 2	APP_AGER	appa_si:ch211-79k12.1
11	Mac 6	L->R	Neu 2	APP_APLP2	appa_aplp2
11	Mac 6	L->R	Neu 2	APP_CD74	appa_cd74a
11	Mac 6	L->R	Neu 2	APP_CD74	appa_cd74b
11	Mac 6	L->R	Neu 2	APP_LRP10	appa_lrp10
11	Mac 6	L->R	Neu 2	APP_NOTCH2	appa_notch2
11	Mac 6	L->R	Neu 2	APP_RPSA	appa_rpsa
11	Mac 6	L->R	Neu 2	ARF6_SMAP1	arf6a_smap1
11	Mac 6	L->R	Neu 2	ARF6_SMAP1	arf6b_smap1
11	Mac 6	L->R	Neu 2	BSG_SELE	bsg_selp
11	Mac 6	L->R	Neu 2	CALM2_ABCA1	calm2a_abca1a
11	Mac 6	L->R	Neu 2	CALM2_ABCA1	calm2a_abca1b
11	Mac 6	L->R	Neu 2	CALM2_INSR	calm2a_insra
11	Mac 6	L->R	Neu 2	CALM2_KCNQ5	calm2a_kcnq5b
11	Mac 6	L->R	Neu 2	CALR_ITGAV	calr_itgav
11	Mac 6	L->R	Neu 2	CD99_CD81	cd99_cd81a
11	Mac 6	L->R	Neu 2	CNTF_IL6R	m17_il6r
11	Mac 6	L->R	Neu 2	CSF3_CSF3R	csf3a_csf3r
11	Mac 6	L->R	Neu 2	CSF3_CSF3R	csf3b_csf3r
11	Mac 6	L->R	Neu 2	CXCL9_CXCR3	BX323596.1_cxcr3.3
11	Mac 6	L->R	Neu 2	CXCL9_CXCR3	BX323596.2_cxcr3.3
11	Mac 6	L->R	Neu 2	F13A1_ITGA4	f13a1b_itga4
11	Mac 6	L->R	Neu 2	F13A1_ITGB1	f13a1b_itgb1b
11	Mac 6	L->R	Neu 2	FN1_C5AR1	fn1a_CABZ01041494.1
11	Mac 6	L->R	Neu 2	FN1_ITGA4	fn1a_itga4
11	Mac 6	L->R	Neu 2	FN1_ITGA5	fn1a_itga5
11	Mac 6	L->R	Neu 2	FN1_ITGAV	fn1a_itgav
11	Mac 6	L->R	Neu 2	FN1_ITGB1	fn1a_itgb1b
11	Mac 6	L->R	Neu 2	GNAI2_ADCY7	gnai2b_adcy7
11	Mac 6	L->R	Neu 2	GNAI2_C5AR1	gnai2b_CABZ01041494.1
11	Mac 6	L->R	Neu 2	GNAI2_CXCR3	gnai2b_cxcr3.3
11	Mac 6	L->R	Neu 2	GNAI2_S1PR4	gnai2b_s1pr4
11	Mac 6	L->R	Neu 2	GNAI2_ADCY7	gnai2a_adcy7
11	Mac 6	L->R	Neu 2	GNAI2_C5AR1	gnai2a_CABZ01041494.1
11	Mac 6	L->R	Neu 2	GNAI2_CXCR3	gnai2a_cxcr3.3
11	Mac 6	L->R	Neu 2	GNAI2_S1PR4	gnai2a_s1pr4
11	Mac 6	L->R	Neu 2	GNAS_ADCY7	gnas_adcy7
11	Mac 6	L->R	Neu 2	GNAS_CRHR1	gnas_crhr1
11	Mac 6	L->R	Neu 2	GPI_AMFR	gpia_amfra
11	Mac 6	L->R	Neu 2	GRN_SORT1	grn1_sort1b
11	Mac 6	L->R	Neu 2	GRN_TNFRSF1A	grn1_fas
11	Mac 6	L->R	Neu 2	GRN_SORT1	grn2_sort1b
11	Mac 6	L->R	Neu 2	GRN_TNFRSF1A	grn2_fas
11	Mac 6	L->R	Neu 2	HBEGF_CD82	hbegfa_cd82a
11	Mac 6	L->R	Neu 2	HBEGF_CD82	hbegfa_cd82b
11	Mac 6	L->R	Neu 2	HBEGF_CD82	hbegfb_cd82a
11	Mac 6	L->R	Neu 2	HBEGF_CD82	hbegfb_cd82b
11	Mac 6	L->R	Neu 2	HMGB1_AGER	hmgb1a_si:ch211-79k12.1
11	Mac 6	L->R	Neu 2	HMGB1_CXCR4	hmgb1a_cxcr4a
11	Mac 6	L->R	Neu 2	HMGB1_CXCR4	hmgb1a_cxcr4b
11	Mac 6	L->R	Neu 2	ICAM3_ITGB2	si:ch211-66e2.3_itgb2
11	Mac 6	L->R	Neu 2	ICAM3_ITGB2	si:ch73-208g10.1_itgb2
11	Mac 6	L->R	Neu 2	ICAM3_ITGB2	icam3_itgb2
11	Mac 6	L->R	Neu 2	IGF2_INSR	igf2b_insra
11	Mac 6	L->R	Neu 2	IL16_CD4	il16_dicp1.3-4
11	Mac 6	L->R	Neu 2	IL16_CD4	il16_dicp3.3
11	Mac 6	L->R	Neu 2	IL16_CD4	il16_dicp3.1
11	Mac 6	L->R	Neu 2	IL16_CD4	il16_dicp2.2
11	Mac 6	L->R	Neu 2	IL1B_IL1R1	il1b_CABZ01054965.1
11	Mac 6	L->R	Neu 2	INHBA_ACVR2A	inhbaa_acvr2aa
11	Mac 6	L->R	Neu 2	INHBA_SMAD3	inhbaa_smad3a
11	Mac 6	L->R	Neu 2	LRPAP1_SORT1	lrpap1_sort1b
11	Mac 6	L->R	Neu 2	LTF_TFRC	tfa_tfr1b
11	Mac 6	L->R	Neu 2	MFNG_NOTCH2	mfng_notch2
11	Mac 6	L->R	Neu 2	MIF_CD74	mif_cd74a
11	Mac 6	L->R	Neu 2	MIF_CD74	mif_cd74b
11	Mac 6	L->R	Neu 2	MIF_CXCR4	mif_cxcr4a
11	Mac 6	L->R	Neu 2	MIF_CXCR4	mif_cxcr4b
11	Mac 6	L->R	Neu 2	MMP9_ITGB2	mmp9_itgb2
11	Mac 6	L->R	Neu 2	NAMPT_INSR	nampta_insra
11	Mac 6	L->R	Neu 2	NUCB2_ERAP1	nucb2a_erap1b
11	Mac 6	L->R	Neu 2	NUCB2_ERAP1	nucb2b_erap1b
11	Mac 6	L->R	Neu 2	PDGFB_ITGAV	pdgfba_itgav
11	Mac 6	L->R	Neu 2	PSAP_SORT1	psap_sort1b
11	Mac 6	L->R	Neu 2	PSEN1_NOTCH2	psen1_notch2
11	Mac 6	L->R	Neu 2	RPS19_C5AR1	rps19_CABZ01041494.1
11	Mac 6	L->R	Neu 2	SERPINE1_ITGAV	serpine1_itgav
11	Mac 6	L->R	Neu 2	TIMP2_ITGB1	timp2b_itgb1b
11	Mac 6	L->R	Neu 2	TNF_TNFRSF1A	tnfb_fas
11	Mac 6	L->R	Neu 2	TNF_TRADD	tnfb_tradd
12	Mac 7	L->R	Neu 1	ADAM10_IL6R	adam10a_il6r
12	Mac 7	L->R	Neu 1	ADAM10_NOTCH2	adam10a_notch2
12	Mac 7	L->R	Neu 1	ADAM10_TSPAN14	adam10a_tspan14
12	Mac 7	L->R	Neu 1	ADAM17_IL6R	adam17a_il6r
12	Mac 7	L->R	Neu 1	ADAM17_ITGA5	adam17a_itga5
12	Mac 7	L->R	Neu 1	ADAM9_ITGAV	adam9_itgav
12	Mac 7	L->R	Neu 1	AGTRAP_RACK1	agtrap_rack1
12	Mac 7	L->R	Neu 1	ALOX5AP_ALOX5	alox5ap_alox5a
12	Mac 7	L->R	Neu 1	APOE_ABCA1	apoeb_abca1a
12	Mac 7	L->R	Neu 1	APOE_ABCA1	apoeb_abca1b
12	Mac 7	L->R	Neu 1	APP_AGER	appa_si:ch211-79k12.1
12	Mac 7	L->R	Neu 1	APP_APLP2	appa_aplp2
12	Mac 7	L->R	Neu 1	APP_CD74	appa_cd74a
12	Mac 7	L->R	Neu 1	APP_CD74	appa_cd74b
12	Mac 7	L->R	Neu 1	APP_LRP10	appa_lrp10
12	Mac 7	L->R	Neu 1	APP_NOTCH2	appa_notch2
12	Mac 7	L->R	Neu 1	APP_RPSA	appa_rpsa
12	Mac 7	L->R	Neu 1	ARF6_SMAP1	arf6a_smap1
12	Mac 7	L->R	Neu 1	ARF6_SMAP1	arf6b_smap1
12	Mac 7	L->R	Neu 1	BSG_SELE	bsg_selp
12	Mac 7	L->R	Neu 1	CALM2_ABCA1	calm3a_abca1a
12	Mac 7	L->R	Neu 1	CALM2_ABCA1	calm3a_abca1b
12	Mac 7	L->R	Neu 1	CALM2_INSR	calm3a_insra
12	Mac 7	L->R	Neu 1	CALM2_KCNQ5	calm3a_kcnq5b
12	Mac 7	L->R	Neu 1	CALM2_ABCA1	calm2a_abca1a
12	Mac 7	L->R	Neu 1	CALM2_ABCA1	calm2a_abca1b
12	Mac 7	L->R	Neu 1	CALM2_INSR	calm2a_insra
12	Mac 7	L->R	Neu 1	CALM2_KCNQ5	calm2a_kcnq5b
12	Mac 7	L->R	Neu 1	CD99_CD81	cd99_cd81a
12	Mac 7	L->R	Neu 1	CSF3_CSF3R	csf3b_csf3r
12	Mac 7	L->R	Neu 1	CXCL9_CXCR3	BX323596.2_cxcr3.3
12	Mac 7	L->R	Neu 1	F13A1_ITGA4	f13a1b_itga4
12	Mac 7	L->R	Neu 1	F13A1_ITGA4	f13a1a.1_itga4
12	Mac 7	L->R	Neu 1	FN1_C5AR1	fn1a_CABZ01041494.1
12	Mac 7	L->R	Neu 1	FN1_ITGA4	fn1a_itga4
12	Mac 7	L->R	Neu 1	FN1_ITGA5	fn1a_itga5
12	Mac 7	L->R	Neu 1	FN1_ITGAV	fn1a_itgav
12	Mac 7	L->R	Neu 1	GNAI2_ADCY7	gnai2b_adcy7
12	Mac 7	L->R	Neu 1	GNAI2_C5AR1	gnai2b_CABZ01041494.1
12	Mac 7	L->R	Neu 1	GNAI2_CXCR3	gnai2b_cxcr3.3
12	Mac 7	L->R	Neu 1	GNAI2_S1PR4	gnai2b_s1pr4
12	Mac 7	L->R	Neu 1	GNAI2_ADCY7	gnai2a_adcy7
12	Mac 7	L->R	Neu 1	GNAI2_C5AR1	gnai2a_CABZ01041494.1
12	Mac 7	L->R	Neu 1	GNAI2_CXCR3	gnai2a_cxcr3.3
12	Mac 7	L->R	Neu 1	GNAI2_S1PR4	gnai2a_s1pr4
12	Mac 7	L->R	Neu 1	GNAS_ADCY7	gnas_adcy7
12	Mac 7	L->R	Neu 1	GNAS_CRHR1	gnas_crhr1
12	Mac 7	L->R	Neu 1	GPI_AMFR	gpia_amfra
12	Mac 7	L->R	Neu 1	GRN_SORT1	grn1_sort1b
12	Mac 7	L->R	Neu 1	GRN_TNFRSF1B	grn1_tnfrsf1b
12	Mac 7	L->R	Neu 1	GRN_SORT1	grn2_sort1b
12	Mac 7	L->R	Neu 1	GRN_TNFRSF1B	grn2_tnfrsf1b
12	Mac 7	L->R	Neu 1	HBEGF_CD82	hbegfb_cd82a
12	Mac 7	L->R	Neu 1	HBEGF_CD82	hbegfb_cd82b
12	Mac 7	L->R	Neu 1	HMGB1_AGER	hmgb1b_si:ch211-79k12.1
12	Mac 7	L->R	Neu 1	HMGB1_CXCR4	hmgb1b_cxcr4a
12	Mac 7	L->R	Neu 1	HMGB1_CXCR4	hmgb1b_cxcr4b
12	Mac 7	L->R	Neu 1	HMGB1_AGER	hmgb1a_si:ch211-79k12.1
12	Mac 7	L->R	Neu 1	HMGB1_CXCR4	hmgb1a_cxcr4a
12	Mac 7	L->R	Neu 1	HMGB1_CXCR4	hmgb1a_cxcr4b
12	Mac 7	L->R	Neu 1	ICAM3_ITGB2	si:ch211-66e2.3_itgb2
12	Mac 7	L->R	Neu 1	ICAM3_ITGB2	si:ch73-208g10.1_itgb2
12	Mac 7	L->R	Neu 1	ICAM3_ITGB2	icam3_itgb2
12	Mac 7	L->R	Neu 1	IGF2_INSR	igf2b_insra
12	Mac 7	L->R	Neu 1	IL16_CD4	il16_dicp1.3-4
12	Mac 7	L->R	Neu 1	IL16_CD4	il16_dicp3.3
12	Mac 7	L->R	Neu 1	IL16_CD4	il16_dicp3.1
12	Mac 7	L->R	Neu 1	IL1B_IL1R1	il1b_CABZ01054965.1
12	Mac 7	L->R	Neu 1	IL1B_IL1R1	il1b_zmp:0000000936
12	Mac 7	L->R	Neu 1	LIN7C_ABCA1	lin7c_abca1a
12	Mac 7	L->R	Neu 1	LIN7C_ABCA1	lin7c_abca1b
12	Mac 7	L->R	Neu 1	LRPAP1_SORT1	lrpap1_sort1b
12	Mac 7	L->R	Neu 1	MFNG_NOTCH2	mfng_notch2
12	Mac 7	L->R	Neu 1	MIF_CD74	mif_cd74a
12	Mac 7	L->R	Neu 1	MIF_CD74	mif_cd74b
12	Mac 7	L->R	Neu 1	MIF_CXCR4	mif_cxcr4a
12	Mac 7	L->R	Neu 1	MIF_CXCR4	mif_cxcr4b
12	Mac 7	L->R	Neu 1	MMP9_ITGB2	mmp9_itgb2
12	Mac 7	L->R	Neu 1	NUCB2_ERAP1	nucb2a_erap1b
12	Mac 7	L->R	Neu 1	PDGFB_ITGAV	pdgfba_itgav
12	Mac 7	L->R	Neu 1	PSAP_SORT1	psap_sort1b
12	Mac 7	L->R	Neu 1	RPS19_C5AR1	rps19_CABZ01041494.1
12	Mac 7	L->R	Neu 1	TNF_TNFRSF1B	tnfb_tnfrsf1b
12	Mac 7	L->R	Neu 1	TNF_TRADD	tnfb_tradd
12	Mac 7	L->R	Neu 1	TNFSF13B_TFRC	tnfsf13b_tfr1b
13	Mac 7	L->R	Neu 2	ADAM10_IL6R	adam10a_il6r
13	Mac 7	L->R	Neu 2	ADAM10_NOTCH2	adam10a_notch2
13	Mac 7	L->R	Neu 2	ADAM10_TSPAN14	adam10a_tspan14
13	Mac 7	L->R	Neu 2	ADAM17_IL6R	adam17a_il6r
13	Mac 7	L->R	Neu 2	ADAM17_ITGA5	adam17a_itga5
13	Mac 7	L->R	Neu 2	ADAM17_ITGB1	adam17a_itgb1b
13	Mac 7	L->R	Neu 2	ADAM9_ITGAV	adam9_itgav
13	Mac 7	L->R	Neu 2	ADAM9_ITGB1	adam9_itgb1b
13	Mac 7	L->R	Neu 2	AGTRAP_RACK1	agtrap_rack1
13	Mac 7	L->R	Neu 2	ALOX5AP_ALOX5	alox5ap_alox5a
13	Mac 7	L->R	Neu 2	APOE_ABCA1	apoeb_abca1a
13	Mac 7	L->R	Neu 2	APOE_ABCA1	apoeb_abca1b
13	Mac 7	L->R	Neu 2	APP_AGER	appa_si:ch211-79k12.1
13	Mac 7	L->R	Neu 2	APP_APLP2	appa_aplp2
13	Mac 7	L->R	Neu 2	APP_CD74	appa_cd74a
13	Mac 7	L->R	Neu 2	APP_CD74	appa_cd74b
13	Mac 7	L->R	Neu 2	APP_LRP10	appa_lrp10
13	Mac 7	L->R	Neu 2	APP_NOTCH2	appa_notch2
13	Mac 7	L->R	Neu 2	APP_RPSA	appa_rpsa
13	Mac 7	L->R	Neu 2	ARF6_SMAP1	arf6a_smap1
13	Mac 7	L->R	Neu 2	ARF6_SMAP1	arf6b_smap1
13	Mac 7	L->R	Neu 2	BSG_SELE	bsg_selp
13	Mac 7	L->R	Neu 2	CALM2_ABCA1	calm3a_abca1a
13	Mac 7	L->R	Neu 2	CALM2_ABCA1	calm3a_abca1b
13	Mac 7	L->R	Neu 2	CALM2_INSR	calm3a_insra
13	Mac 7	L->R	Neu 2	CALM2_KCNQ5	calm3a_kcnq5b
13	Mac 7	L->R	Neu 2	CALM2_ABCA1	calm2a_abca1a
13	Mac 7	L->R	Neu 2	CALM2_ABCA1	calm2a_abca1b
13	Mac 7	L->R	Neu 2	CALM2_INSR	calm2a_insra
13	Mac 7	L->R	Neu 2	CALM2_KCNQ5	calm2a_kcnq5b
13	Mac 7	L->R	Neu 2	CD99_CD81	cd99_cd81a
13	Mac 7	L->R	Neu 2	CSF3_CSF3R	csf3b_csf3r
13	Mac 7	L->R	Neu 2	CXCL9_CXCR3	BX323596.2_cxcr3.3
13	Mac 7	L->R	Neu 2	F13A1_ITGA4	f13a1b_itga4
13	Mac 7	L->R	Neu 2	F13A1_ITGB1	f13a1b_itgb1b
13	Mac 7	L->R	Neu 2	F13A1_ITGA4	f13a1a.1_itga4
13	Mac 7	L->R	Neu 2	F13A1_ITGB1	f13a1a.1_itgb1b
13	Mac 7	L->R	Neu 2	FN1_C5AR1	fn1a_CABZ01041494.1
13	Mac 7	L->R	Neu 2	FN1_ITGA4	fn1a_itga4
13	Mac 7	L->R	Neu 2	FN1_ITGA5	fn1a_itga5
13	Mac 7	L->R	Neu 2	FN1_ITGAV	fn1a_itgav
13	Mac 7	L->R	Neu 2	FN1_ITGB1	fn1a_itgb1b
13	Mac 7	L->R	Neu 2	GNAI2_ADCY7	gnai2b_adcy7
13	Mac 7	L->R	Neu 2	GNAI2_C5AR1	gnai2b_CABZ01041494.1
13	Mac 7	L->R	Neu 2	GNAI2_CXCR3	gnai2b_cxcr3.3
13	Mac 7	L->R	Neu 2	GNAI2_S1PR4	gnai2b_s1pr4
13	Mac 7	L->R	Neu 2	GNAI2_ADCY7	gnai2a_adcy7
13	Mac 7	L->R	Neu 2	GNAI2_C5AR1	gnai2a_CABZ01041494.1
13	Mac 7	L->R	Neu 2	GNAI2_CXCR3	gnai2a_cxcr3.3
13	Mac 7	L->R	Neu 2	GNAI2_S1PR4	gnai2a_s1pr4
13	Mac 7	L->R	Neu 2	GNAS_ADCY7	gnas_adcy7
13	Mac 7	L->R	Neu 2	GNAS_CRHR1	gnas_crhr1
13	Mac 7	L->R	Neu 2	GPI_AMFR	gpia_amfra
13	Mac 7	L->R	Neu 2	GRN_SORT1	grn1_sort1b
13	Mac 7	L->R	Neu 2	GRN_TNFRSF1A	grn1_fas
13	Mac 7	L->R	Neu 2	GRN_SORT1	grn2_sort1b
13	Mac 7	L->R	Neu 2	GRN_TNFRSF1A	grn2_fas
13	Mac 7	L->R	Neu 2	HBEGF_CD82	hbegfb_cd82a
13	Mac 7	L->R	Neu 2	HBEGF_CD82	hbegfb_cd82b
13	Mac 7	L->R	Neu 2	HMGB1_AGER	hmgb1b_si:ch211-79k12.1
13	Mac 7	L->R	Neu 2	HMGB1_CXCR4	hmgb1b_cxcr4a
13	Mac 7	L->R	Neu 2	HMGB1_CXCR4	hmgb1b_cxcr4b
13	Mac 7	L->R	Neu 2	HMGB1_AGER	hmgb1a_si:ch211-79k12.1
13	Mac 7	L->R	Neu 2	HMGB1_CXCR4	hmgb1a_cxcr4a
13	Mac 7	L->R	Neu 2	HMGB1_CXCR4	hmgb1a_cxcr4b
13	Mac 7	L->R	Neu 2	ICAM3_ITGB2	si:ch211-66e2.3_itgb2
13	Mac 7	L->R	Neu 2	ICAM3_ITGB2	si:ch73-208g10.1_itgb2
13	Mac 7	L->R	Neu 2	ICAM3_ITGB2	icam3_itgb2
13	Mac 7	L->R	Neu 2	IGF2_INSR	igf2b_insra
13	Mac 7	L->R	Neu 2	IL16_CD4	il16_dicp1.3-4
13	Mac 7	L->R	Neu 2	IL16_CD4	il16_dicp3.3
13	Mac 7	L->R	Neu 2	IL16_CD4	il16_dicp3.1
13	Mac 7	L->R	Neu 2	IL16_CD4	il16_dicp2.2
13	Mac 7	L->R	Neu 2	IL1B_IL1R1	il1b_CABZ01054965.1
13	Mac 7	L->R	Neu 2	LIN7C_ABCA1	lin7c_abca1a
13	Mac 7	L->R	Neu 2	LIN7C_ABCA1	lin7c_abca1b
13	Mac 7	L->R	Neu 2	LRPAP1_SORT1	lrpap1_sort1b
13	Mac 7	L->R	Neu 2	MFNG_NOTCH2	mfng_notch2
13	Mac 7	L->R	Neu 2	MIF_CD74	mif_cd74a
13	Mac 7	L->R	Neu 2	MIF_CD74	mif_cd74b
13	Mac 7	L->R	Neu 2	MIF_CXCR4	mif_cxcr4a
13	Mac 7	L->R	Neu 2	MIF_CXCR4	mif_cxcr4b
13	Mac 7	L->R	Neu 2	MMP9_ITGB2	mmp9_itgb2
13	Mac 7	L->R	Neu 2	NUCB2_ERAP1	nucb2a_erap1b
13	Mac 7	L->R	Neu 2	PDGFB_ITGAV	pdgfba_itgav
13	Mac 7	L->R	Neu 2	PSAP_SORT1	psap_sort1b
13	Mac 7	L->R	Neu 2	RPS19_C5AR1	rps19_CABZ01041494.1
13	Mac 7	L->R	Neu 2	TIMP2_ITGB1	timp2b_itgb1b
13	Mac 7	L->R	Neu 2	TIMP2_ITGB1	timp2a_itgb1b
13	Mac 7	L->R	Neu 2	TNF_TNFRSF1A	tnfb_fas
13	Mac 7	L->R	Neu 2	TNF_TRADD	tnfb_tradd
13	Mac 7	L->R	Neu 2	TNFSF13B_TFRC	tnfsf13b_tfr1b
14	MN	L->R	Neu 1	ADAM10_IL6R	adam10a_il6r
14	MN	L->R	Neu 1	ADAM10_NOTCH2	adam10a_notch2
14	MN	L->R	Neu 1	ADAM10_TSPAN14	adam10a_tspan14
14	MN	L->R	Neu 1	ADAM17_IL6R	adam17a_il6r
14	MN	L->R	Neu 1	ADAM17_ITGA5	adam17a_itga5
14	MN	L->R	Neu 1	ADAM28_ITGA4	adam28_itga4
14	MN	L->R	Neu 1	ADAM9_ITGAV	adam9_itgav
14	MN	L->R	Neu 1	ADM_GPR84	adma_gpr84
14	MN	L->R	Neu 1	AGTRAP_RACK1	agtrap_rack1
14	MN	L->R	Neu 1	ALOX5AP_ALOX5	alox5ap_alox5a
14	MN	L->R	Neu 1	APOE_ABCA1	apoeb_abca1a
14	MN	L->R	Neu 1	APOE_ABCA1	apoeb_abca1b
14	MN	L->R	Neu 1	APP_AGER	appa_si:ch211-79k12.1
14	MN	L->R	Neu 1	APP_APLP2	appa_aplp2
14	MN	L->R	Neu 1	APP_CD74	appa_cd74a
14	MN	L->R	Neu 1	APP_CD74	appa_cd74b
14	MN	L->R	Neu 1	APP_LRP10	appa_lrp10
14	MN	L->R	Neu 1	APP_NOTCH2	appa_notch2
14	MN	L->R	Neu 1	APP_RPSA	appa_rpsa
14	MN	L->R	Neu 1	ARF6_SMAP1	arf6a_smap1
14	MN	L->R	Neu 1	ARF6_SMAP1	arf6b_smap1
14	MN	L->R	Neu 1	BSG_SELE	bsg_selp
14	MN	L->R	Neu 1	CALM2_ABCA1	calm2a_abca1a
14	MN	L->R	Neu 1	CALM2_ABCA1	calm2a_abca1b
14	MN	L->R	Neu 1	CALM2_INSR	calm2a_insra
14	MN	L->R	Neu 1	CALM2_KCNQ5	calm2a_kcnq5b
14	MN	L->R	Neu 1	CD99_CD81	cd99_cd81a
14	MN	L->R	Neu 1	CNTF_IL6R	m17_il6r
14	MN	L->R	Neu 1	CSF3_CSF3R	csf3a_csf3r
14	MN	L->R	Neu 1	CSF3_CSF3R	csf3b_csf3r
14	MN	L->R	Neu 1	CXCL9_CXCR3	cxcl11.8_cxcr3.3
14	MN	L->R	Neu 1	CXCL9_CXCR3	cxcl11.6_cxcr3.3
14	MN	L->R	Neu 1	CXCL9_CXCR3	cxcl11.5_cxcr3.3
14	MN	L->R	Neu 1	CXCL9_CXCR3	BX323596.1_cxcr3.3
14	MN	L->R	Neu 1	CXCL9_CXCR3	BX323596.2_cxcr3.3
14	MN	L->R	Neu 1	F13A1_ITGA4	f13a1b_itga4
14	MN	L->R	Neu 1	F13A1_ITGA4	f13a1a.1_itga4
14	MN	L->R	Neu 1	GNAI2_ADCY7	gnai2b_adcy7
14	MN	L->R	Neu 1	GNAI2_C5AR1	gnai2b_CABZ01041494.1
14	MN	L->R	Neu 1	GNAI2_CXCR3	gnai2b_cxcr3.3
14	MN	L->R	Neu 1	GNAI2_S1PR4	gnai2b_s1pr4
14	MN	L->R	Neu 1	GNAI2_ADCY7	gnai2a_adcy7
14	MN	L->R	Neu 1	GNAI2_C5AR1	gnai2a_CABZ01041494.1
14	MN	L->R	Neu 1	GNAI2_CXCR3	gnai2a_cxcr3.3
14	MN	L->R	Neu 1	GNAI2_S1PR4	gnai2a_s1pr4
14	MN	L->R	Neu 1	GNAS_ADCY7	gnas_adcy7
14	MN	L->R	Neu 1	GNAS_CRHR1	gnas_crhr1
14	MN	L->R	Neu 1	GPI_AMFR	gpia_amfra
14	MN	L->R	Neu 1	GRN_SORT1	grn1_sort1b
14	MN	L->R	Neu 1	GRN_TNFRSF1B	grn1_tnfrsf1b
14	MN	L->R	Neu 1	GRN_SORT1	grn2_sort1b
14	MN	L->R	Neu 1	GRN_TNFRSF1B	grn2_tnfrsf1b
14	MN	L->R	Neu 1	HBEGF_CD82	hbegfa_cd82a
14	MN	L->R	Neu 1	HBEGF_CD82	hbegfa_cd82b
14	MN	L->R	Neu 1	HBEGF_CD82	hbegfb_cd82a
14	MN	L->R	Neu 1	HBEGF_CD82	hbegfb_cd82b
14	MN	L->R	Neu 1	HMGB1_AGER	hmgb1a_si:ch211-79k12.1
14	MN	L->R	Neu 1	HMGB1_CXCR4	hmgb1a_cxcr4a
14	MN	L->R	Neu 1	HMGB1_CXCR4	hmgb1a_cxcr4b
14	MN	L->R	Neu 1	ICAM3_ITGB2	si:ch211-66e2.3_itgb2
14	MN	L->R	Neu 1	ICAM3_ITGB2	si:ch73-208g10.1_itgb2
14	MN	L->R	Neu 1	ICAM3_ITGB2	icam3_itgb2
14	MN	L->R	Neu 1	IGF2_INSR	igf2b_insra
14	MN	L->R	Neu 1	IL16_CD4	il16_dicp1.3-4
14	MN	L->R	Neu 1	IL16_CD4	il16_dicp3.3
14	MN	L->R	Neu 1	IL16_CD4	il16_dicp3.1
14	MN	L->R	Neu 1	IL1B_IL1R1	il1b_CABZ01054965.1
14	MN	L->R	Neu 1	IL1B_IL1R1	il1b_zmp:0000000936
14	MN	L->R	Neu 1	LRPAP1_SORT1	lrpap1_sort1b
14	MN	L->R	Neu 1	LTF_TFRC	tfa_tfr1b
14	MN	L->R	Neu 1	MFNG_NOTCH2	mfng_notch2
14	MN	L->R	Neu 1	MIF_CD74	mif_cd74a
14	MN	L->R	Neu 1	MIF_CD74	mif_cd74b
14	MN	L->R	Neu 1	MIF_CXCR4	mif_cxcr4a
14	MN	L->R	Neu 1	MIF_CXCR4	mif_cxcr4b
14	MN	L->R	Neu 1	MMP9_ITGB2	mmp9_itgb2
14	MN	L->R	Neu 1	NUCB2_ERAP1	nucb2a_erap1b
14	MN	L->R	Neu 1	PDGFB_ITGAV	pdgfba_itgav
14	MN	L->R	Neu 1	PSAP_SORT1	psap_sort1b
14	MN	L->R	Neu 1	PSEN1_NOTCH2	psen1_notch2
14	MN	L->R	Neu 1	RPS19_C5AR1	rps19_CABZ01041494.1
14	MN	L->R	Neu 1	SERPINE1_ITGAV	serpine1_itgav
14	MN	L->R	Neu 1	TNF_TNFRSF1B	tnfa_tnfrsf1b
14	MN	L->R	Neu 1	TNF_TRADD	tnfa_tradd
14	MN	L->R	Neu 1	TNF_TNFRSF1B	tnfb_tnfrsf1b
14	MN	L->R	Neu 1	TNF_TRADD	tnfb_tradd
14	MN	L->R	Neu 1	TNFSF13B_TFRC	tnfsf13b_tfr1b
15	MN	L->R	Neu 2	ADAM10_IL6R	adam10a_il6r
15	MN	L->R	Neu 2	ADAM10_NOTCH2	adam10a_notch2
15	MN	L->R	Neu 2	ADAM10_TSPAN14	adam10a_tspan14
15	MN	L->R	Neu 2	ADAM17_IL6R	adam17a_il6r
15	MN	L->R	Neu 2	ADAM17_ITGA5	adam17a_itga5
15	MN	L->R	Neu 2	ADAM17_ITGB1	adam17a_itgb1b
15	MN	L->R	Neu 2	ADAM28_ITGA4	adam28_itga4
15	MN	L->R	Neu 2	ADAM9_ITGAV	adam9_itgav
15	MN	L->R	Neu 2	ADAM9_ITGB1	adam9_itgb1b
15	MN	L->R	Neu 2	ADM_GPR84	adma_gpr84
15	MN	L->R	Neu 2	AGTRAP_RACK1	agtrap_rack1
15	MN	L->R	Neu 2	ALOX5AP_ALOX5	alox5ap_alox5a
15	MN	L->R	Neu 2	APOE_ABCA1	apoeb_abca1a
15	MN	L->R	Neu 2	APOE_ABCA1	apoeb_abca1b
15	MN	L->R	Neu 2	APP_AGER	appa_si:ch211-79k12.1
15	MN	L->R	Neu 2	APP_APLP2	appa_aplp2
15	MN	L->R	Neu 2	APP_CD74	appa_cd74a
15	MN	L->R	Neu 2	APP_CD74	appa_cd74b
15	MN	L->R	Neu 2	APP_LRP10	appa_lrp10
15	MN	L->R	Neu 2	APP_NOTCH2	appa_notch2
15	MN	L->R	Neu 2	APP_RPSA	appa_rpsa
15	MN	L->R	Neu 2	ARF6_SMAP1	arf6a_smap1
15	MN	L->R	Neu 2	ARF6_SMAP1	arf6b_smap1
15	MN	L->R	Neu 2	BSG_SELE	bsg_selp
15	MN	L->R	Neu 2	CALM2_ABCA1	calm2a_abca1a
15	MN	L->R	Neu 2	CALM2_ABCA1	calm2a_abca1b
15	MN	L->R	Neu 2	CALM2_INSR	calm2a_insra
15	MN	L->R	Neu 2	CALM2_KCNQ5	calm2a_kcnq5b
15	MN	L->R	Neu 2	CD99_CD81	cd99_cd81a
15	MN	L->R	Neu 2	CNTF_IL6R	m17_il6r
15	MN	L->R	Neu 2	CSF3_CSF3R	csf3a_csf3r
15	MN	L->R	Neu 2	CSF3_CSF3R	csf3b_csf3r
15	MN	L->R	Neu 2	CXCL9_CXCR3	cxcl11.8_cxcr3.3
15	MN	L->R	Neu 2	CXCL9_CXCR3	cxcl11.6_cxcr3.3
15	MN	L->R	Neu 2	CXCL9_CXCR3	cxcl11.5_cxcr3.3
15	MN	L->R	Neu 2	CXCL9_CXCR3	BX323596.1_cxcr3.3
15	MN	L->R	Neu 2	CXCL9_CXCR3	BX323596.2_cxcr3.3
15	MN	L->R	Neu 2	F13A1_ITGA4	f13a1b_itga4
15	MN	L->R	Neu 2	F13A1_ITGB1	f13a1b_itgb1b
15	MN	L->R	Neu 2	F13A1_ITGA4	f13a1a.1_itga4
15	MN	L->R	Neu 2	F13A1_ITGB1	f13a1a.1_itgb1b
15	MN	L->R	Neu 2	GNAI2_ADCY7	gnai2b_adcy7
15	MN	L->R	Neu 2	GNAI2_C5AR1	gnai2b_CABZ01041494.1
15	MN	L->R	Neu 2	GNAI2_CXCR3	gnai2b_cxcr3.3
15	MN	L->R	Neu 2	GNAI2_S1PR4	gnai2b_s1pr4
15	MN	L->R	Neu 2	GNAI2_ADCY7	gnai2a_adcy7
15	MN	L->R	Neu 2	GNAI2_C5AR1	gnai2a_CABZ01041494.1
15	MN	L->R	Neu 2	GNAI2_CXCR3	gnai2a_cxcr3.3
15	MN	L->R	Neu 2	GNAI2_S1PR4	gnai2a_s1pr4
15	MN	L->R	Neu 2	GNAS_ADCY7	gnas_adcy7
15	MN	L->R	Neu 2	GNAS_CRHR1	gnas_crhr1
15	MN	L->R	Neu 2	GPI_AMFR	gpia_amfra
15	MN	L->R	Neu 2	GRN_SORT1	grn1_sort1b
15	MN	L->R	Neu 2	GRN_TNFRSF1A	grn1_fas
15	MN	L->R	Neu 2	GRN_SORT1	grn2_sort1b
15	MN	L->R	Neu 2	GRN_TNFRSF1A	grn2_fas
15	MN	L->R	Neu 2	HBEGF_CD82	hbegfa_cd82a
15	MN	L->R	Neu 2	HBEGF_CD82	hbegfa_cd82b
15	MN	L->R	Neu 2	HBEGF_CD82	hbegfb_cd82a
15	MN	L->R	Neu 2	HBEGF_CD82	hbegfb_cd82b
15	MN	L->R	Neu 2	HMGB1_AGER	hmgb1a_si:ch211-79k12.1
15	MN	L->R	Neu 2	HMGB1_CXCR4	hmgb1a_cxcr4a
15	MN	L->R	Neu 2	HMGB1_CXCR4	hmgb1a_cxcr4b
15	MN	L->R	Neu 2	ICAM3_ITGB2	si:ch211-66e2.3_itgb2
15	MN	L->R	Neu 2	ICAM3_ITGB2	si:ch73-208g10.1_itgb2
15	MN	L->R	Neu 2	ICAM3_ITGB2	icam3_itgb2
15	MN	L->R	Neu 2	IGF2_INSR	igf2b_insra
15	MN	L->R	Neu 2	IL16_CD4	il16_dicp1.3-4
15	MN	L->R	Neu 2	IL16_CD4	il16_dicp3.3
15	MN	L->R	Neu 2	IL16_CD4	il16_dicp3.1
15	MN	L->R	Neu 2	IL16_CD4	il16_dicp2.2
15	MN	L->R	Neu 2	IL1B_IL1R1	il1b_CABZ01054965.1
15	MN	L->R	Neu 2	LRPAP1_SORT1	lrpap1_sort1b
15	MN	L->R	Neu 2	LTF_TFRC	tfa_tfr1b
15	MN	L->R	Neu 2	MFNG_NOTCH2	mfng_notch2
15	MN	L->R	Neu 2	MIF_CD74	mif_cd74a
15	MN	L->R	Neu 2	MIF_CD74	mif_cd74b
15	MN	L->R	Neu 2	MIF_CXCR4	mif_cxcr4a
15	MN	L->R	Neu 2	MIF_CXCR4	mif_cxcr4b
15	MN	L->R	Neu 2	MMP9_ITGB2	mmp9_itgb2
15	MN	L->R	Neu 2	NUCB2_ERAP1	nucb2a_erap1b
15	MN	L->R	Neu 2	PDGFB_ITGAV	pdgfba_itgav
15	MN	L->R	Neu 2	PSAP_SORT1	psap_sort1b
15	MN	L->R	Neu 2	PSEN1_NOTCH2	psen1_notch2
15	MN	L->R	Neu 2	RPS19_C5AR1	rps19_CABZ01041494.1
15	MN	L->R	Neu 2	SERPINE1_ITGAV	serpine1_itgav
15	MN	L->R	Neu 2	TIMP2_ITGB1	timp2b_itgb1b
15	MN	L->R	Neu 2	TNF_TNFRSF1A	tnfa_fas
15	MN	L->R	Neu 2	TNF_TRADD	tnfa_tradd
15	MN	L->R	Neu 2	TNF_TNFRSF1A	tnfb_fas
15	MN	L->R	Neu 2	TNF_TRADD	tnfb_tradd
15	MN	L->R	Neu 2	TNFSF13B_TFRC	tnfsf13b_tfr1b
16	Mac 8	L->R	Neu 1	ADAM10_IL6R	adam10a_il6r
16	Mac 8	L->R	Neu 1	ADAM10_NOTCH2	adam10a_notch2
16	Mac 8	L->R	Neu 1	ADAM10_TSPAN14	adam10a_tspan14
16	Mac 8	L->R	Neu 1	ADAM9_ITGAV	adam9_itgav
16	Mac 8	L->R	Neu 1	ALOX5AP_ALOX5	alox5ap_alox5a
16	Mac 8	L->R	Neu 1	ARF6_SMAP1	arf6a_smap1
16	Mac 8	L->R	Neu 1	BSG_SELE	bsg_selp
16	Mac 8	L->R	Neu 1	CALM2_ABCA1	calm2a_abca1a
16	Mac 8	L->R	Neu 1	CALM2_ABCA1	calm2a_abca1b
16	Mac 8	L->R	Neu 1	CALM2_INSR	calm2a_insra
16	Mac 8	L->R	Neu 1	CALM2_KCNQ5	calm2a_kcnq5b
16	Mac 8	L->R	Neu 1	CD99_CD81	cd99_cd81a
16	Mac 8	L->R	Neu 1	CXCL9_CXCR3	BX323596.2_cxcr3.3
16	Mac 8	L->R	Neu 1	F13A1_ITGA4	f13a1b_itga4
16	Mac 8	L->R	Neu 1	GNAI2_ADCY7	gnai2a_adcy7
16	Mac 8	L->R	Neu 1	GNAI2_C5AR1	gnai2a_CABZ01041494.1
16	Mac 8	L->R	Neu 1	GNAI2_CXCR3	gnai2a_cxcr3.3
16	Mac 8	L->R	Neu 1	GNAI2_S1PR4	gnai2a_s1pr4
16	Mac 8	L->R	Neu 1	GNAS_ADCY7	gnas_adcy7
16	Mac 8	L->R	Neu 1	GNAS_CRHR1	gnas_crhr1
16	Mac 8	L->R	Neu 1	GPI_AMFR	gpia_amfra
16	Mac 8	L->R	Neu 1	GRN_SORT1	grn1_sort1b
16	Mac 8	L->R	Neu 1	GRN_TNFRSF1B	grn1_tnfrsf1b
16	Mac 8	L->R	Neu 1	GRN_SORT1	grn2_sort1b
16	Mac 8	L->R	Neu 1	GRN_TNFRSF1B	grn2_tnfrsf1b
16	Mac 8	L->R	Neu 1	HMGB1_AGER	hmgb1a_si:ch211-79k12.1
16	Mac 8	L->R	Neu 1	HMGB1_CXCR4	hmgb1a_cxcr4a
16	Mac 8	L->R	Neu 1	HMGB1_CXCR4	hmgb1a_cxcr4b
16	Mac 8	L->R	Neu 1	ICAM3_ITGB2	si:ch211-66e2.3_itgb2
16	Mac 8	L->R	Neu 1	ICAM3_ITGB2	si:ch73-208g10.1_itgb2
16	Mac 8	L->R	Neu 1	ICAM3_ITGB2	icam3_itgb2
16	Mac 8	L->R	Neu 1	IGF2_INSR	igf2b_insra
16	Mac 8	L->R	Neu 1	IL16_CD4	il16_dicp1.3-4
16	Mac 8	L->R	Neu 1	IL16_CD4	il16_dicp3.3
16	Mac 8	L->R	Neu 1	IL16_CD4	il16_dicp3.1
16	Mac 8	L->R	Neu 1	IL1B_IL1R1	il1b_CABZ01054965.1
16	Mac 8	L->R	Neu 1	IL1B_IL1R1	il1b_zmp:0000000936
16	Mac 8	L->R	Neu 1	MFNG_NOTCH2	mfng_notch2
16	Mac 8	L->R	Neu 1	MIF_CD74	mif_cd74a
16	Mac 8	L->R	Neu 1	MIF_CD74	mif_cd74b
16	Mac 8	L->R	Neu 1	MIF_CXCR4	mif_cxcr4a
16	Mac 8	L->R	Neu 1	MIF_CXCR4	mif_cxcr4b
16	Mac 8	L->R	Neu 1	MMP9_ITGB2	mmp9_itgb2
16	Mac 8	L->R	Neu 1	PSAP_SORT1	psap_sort1b
16	Mac 8	L->R	Neu 1	RPS19_C5AR1	rps19_CABZ01041494.1
16	Mac 8	L->R	Neu 1	SORBS1_INSR	sorbs1_insra
16	Mac 8	L->R	Neu 1	TNF_TNFRSF1B	tnfb_tnfrsf1b
16	Mac 8	L->R	Neu 1	TNF_TRADD	tnfb_tradd
16	Mac 8	L->R	Neu 1	VEGFA_ITGAV	vegfab_itgav
17	Mac 8	L->R	Neu 2	ADAM10_IL6R	adam10a_il6r
17	Mac 8	L->R	Neu 2	ADAM10_NOTCH2	adam10a_notch2
17	Mac 8	L->R	Neu 2	ADAM10_TSPAN14	adam10a_tspan14
17	Mac 8	L->R	Neu 2	ADAM9_ITGAV	adam9_itgav
17	Mac 8	L->R	Neu 2	ADAM9_ITGB1	adam9_itgb1b
17	Mac 8	L->R	Neu 2	ALOX5AP_ALOX5	alox5ap_alox5a
17	Mac 8	L->R	Neu 2	ARF6_SMAP1	arf6a_smap1
17	Mac 8	L->R	Neu 2	BSG_SELE	bsg_selp
17	Mac 8	L->R	Neu 2	CALM2_ABCA1	calm2a_abca1a
17	Mac 8	L->R	Neu 2	CALM2_ABCA1	calm2a_abca1b
17	Mac 8	L->R	Neu 2	CALM2_INSR	calm2a_insra
17	Mac 8	L->R	Neu 2	CALM2_KCNQ5	calm2a_kcnq5b
17	Mac 8	L->R	Neu 2	CD99_CD81	cd99_cd81a
17	Mac 8	L->R	Neu 2	CXCL9_CXCR3	BX323596.2_cxcr3.3
17	Mac 8	L->R	Neu 2	F13A1_ITGA4	f13a1b_itga4
17	Mac 8	L->R	Neu 2	F13A1_ITGB1	f13a1b_itgb1b
17	Mac 8	L->R	Neu 2	GNAI2_ADCY7	gnai2a_adcy7
17	Mac 8	L->R	Neu 2	GNAI2_C5AR1	gnai2a_CABZ01041494.1
17	Mac 8	L->R	Neu 2	GNAI2_CXCR3	gnai2a_cxcr3.3
17	Mac 8	L->R	Neu 2	GNAI2_S1PR4	gnai2a_s1pr4
17	Mac 8	L->R	Neu 2	GNAS_ADCY7	gnas_adcy7
17	Mac 8	L->R	Neu 2	GNAS_CRHR1	gnas_crhr1
17	Mac 8	L->R	Neu 2	GPI_AMFR	gpia_amfra
17	Mac 8	L->R	Neu 2	GRN_SORT1	grn1_sort1b
17	Mac 8	L->R	Neu 2	GRN_TNFRSF1A	grn1_fas
17	Mac 8	L->R	Neu 2	GRN_SORT1	grn2_sort1b
17	Mac 8	L->R	Neu 2	GRN_TNFRSF1A	grn2_fas
17	Mac 8	L->R	Neu 2	HMGB1_AGER	hmgb1a_si:ch211-79k12.1
17	Mac 8	L->R	Neu 2	HMGB1_CXCR4	hmgb1a_cxcr4a
17	Mac 8	L->R	Neu 2	HMGB1_CXCR4	hmgb1a_cxcr4b
17	Mac 8	L->R	Neu 2	ICAM3_ITGB2	si:ch211-66e2.3_itgb2
17	Mac 8	L->R	Neu 2	ICAM3_ITGB2	si:ch73-208g10.1_itgb2
17	Mac 8	L->R	Neu 2	ICAM3_ITGB2	icam3_itgb2
17	Mac 8	L->R	Neu 2	IGF2_INSR	igf2b_insra
17	Mac 8	L->R	Neu 2	IL16_CD4	il16_dicp1.3-4
17	Mac 8	L->R	Neu 2	IL16_CD4	il16_dicp3.3
17	Mac 8	L->R	Neu 2	IL16_CD4	il16_dicp3.1
17	Mac 8	L->R	Neu 2	IL16_CD4	il16_dicp2.2
17	Mac 8	L->R	Neu 2	IL1B_IL1R1	il1b_CABZ01054965.1
17	Mac 8	L->R	Neu 2	MFNG_NOTCH2	mfng_notch2
17	Mac 8	L->R	Neu 2	MIF_CD74	mif_cd74a
17	Mac 8	L->R	Neu 2	MIF_CD74	mif_cd74b
17	Mac 8	L->R	Neu 2	MIF_CXCR4	mif_cxcr4a
17	Mac 8	L->R	Neu 2	MIF_CXCR4	mif_cxcr4b
17	Mac 8	L->R	Neu 2	MMP9_ITGB2	mmp9_itgb2
17	Mac 8	L->R	Neu 2	PSAP_SORT1	psap_sort1b
17	Mac 8	L->R	Neu 2	RPS19_C5AR1	rps19_CABZ01041494.1
17	Mac 8	L->R	Neu 2	SORBS1_INSR	sorbs1_insra
17	Mac 8	L->R	Neu 2	TIMP2_ITGB1	timp2b_itgb1b
17	Mac 8	L->R	Neu 2	TNF_TNFRSF1A	tnfb_fas
17	Mac 8	L->R	Neu 2	TNF_TRADD	tnfb_tradd
17	Mac 8	L->R	Neu 2	VEGFA_ITGAV	vegfab_itgav
17	Mac 8	L->R	Neu 2	VEGFA_ITGB1	vegfab_itgb1b
18	Mac 9	L->R	Neu 1	ADAM10_IL6R	adam10a_il6r
18	Mac 9	L->R	Neu 1	ADAM10_NOTCH2	adam10a_notch2
18	Mac 9	L->R	Neu 1	ADAM10_TSPAN14	adam10a_tspan14
18	Mac 9	L->R	Neu 1	ADAM17_IL6R	adam17a_il6r
18	Mac 9	L->R	Neu 1	ADAM17_ITGA5	adam17a_itga5
18	Mac 9	L->R	Neu 1	ADM_GPR84	adma_gpr84
18	Mac 9	L->R	Neu 1	ARF6_SMAP1	arf6a_smap1
18	Mac 9	L->R	Neu 1	ARF6_SMAP1	arf6b_smap1
18	Mac 9	L->R	Neu 1	BSG_SELE	bsg_selp
18	Mac 9	L->R	Neu 1	CALM2_ABCA1	calm3a_abca1a
18	Mac 9	L->R	Neu 1	CALM2_ABCA1	calm3a_abca1b
18	Mac 9	L->R	Neu 1	CALM2_INSR	calm3a_insra
18	Mac 9	L->R	Neu 1	CALM2_KCNQ5	calm3a_kcnq5b
18	Mac 9	L->R	Neu 1	CALM2_ABCA1	calm2a_abca1a
18	Mac 9	L->R	Neu 1	CALM2_ABCA1	calm2a_abca1b
18	Mac 9	L->R	Neu 1	CALM2_INSR	calm2a_insra
18	Mac 9	L->R	Neu 1	CALM2_KCNQ5	calm2a_kcnq5b
18	Mac 9	L->R	Neu 1	CALR_ITGAV	calr_itgav
18	Mac 9	L->R	Neu 1	CD99_CD81	cd99_cd81a
18	Mac 9	L->R	Neu 1	CXCL9_CXCR3	cxcl11.6_cxcr3.3
18	Mac 9	L->R	Neu 1	CXCL9_CXCR3	cxcl11.5_cxcr3.3
18	Mac 9	L->R	Neu 1	CXCL9_CXCR3	BX323596.1_cxcr3.3
18	Mac 9	L->R	Neu 1	CXCL9_CXCR3	BX323596.2_cxcr3.3
18	Mac 9	L->R	Neu 1	F13A1_ITGA4	f13a1b_itga4
18	Mac 9	L->R	Neu 1	GNAI2_ADCY7	gnai2b_adcy7
18	Mac 9	L->R	Neu 1	GNAI2_C5AR1	gnai2b_CABZ01041494.1
18	Mac 9	L->R	Neu 1	GNAI2_CXCR3	gnai2b_cxcr3.3
18	Mac 9	L->R	Neu 1	GNAI2_S1PR4	gnai2b_s1pr4
18	Mac 9	L->R	Neu 1	GNAI2_ADCY7	gnai2a_adcy7
18	Mac 9	L->R	Neu 1	GNAI2_C5AR1	gnai2a_CABZ01041494.1
18	Mac 9	L->R	Neu 1	GNAI2_CXCR3	gnai2a_cxcr3.3
18	Mac 9	L->R	Neu 1	GNAI2_S1PR4	gnai2a_s1pr4
18	Mac 9	L->R	Neu 1	GNAS_ADCY7	gnas_adcy7
18	Mac 9	L->R	Neu 1	GNAS_CRHR1	gnas_crhr1
18	Mac 9	L->R	Neu 1	GPI_AMFR	gpia_amfra
18	Mac 9	L->R	Neu 1	GRN_SORT1	grn1_sort1b
18	Mac 9	L->R	Neu 1	GRN_TNFRSF1B	grn1_tnfrsf1b
18	Mac 9	L->R	Neu 1	GRN_SORT1	grn2_sort1b
18	Mac 9	L->R	Neu 1	GRN_TNFRSF1B	grn2_tnfrsf1b
18	Mac 9	L->R	Neu 1	HBEGF_CD82	hbegfa_cd82a
18	Mac 9	L->R	Neu 1	HBEGF_CD82	hbegfa_cd82b
18	Mac 9	L->R	Neu 1	HMGB1_AGER	hmgb1b_si:ch211-79k12.1
18	Mac 9	L->R	Neu 1	HMGB1_CXCR4	hmgb1b_cxcr4a
18	Mac 9	L->R	Neu 1	HMGB1_CXCR4	hmgb1b_cxcr4b
18	Mac 9	L->R	Neu 1	HMGB1_AGER	hmgb1a_si:ch211-79k12.1
18	Mac 9	L->R	Neu 1	HMGB1_CXCR4	hmgb1a_cxcr4a
18	Mac 9	L->R	Neu 1	HMGB1_CXCR4	hmgb1a_cxcr4b
18	Mac 9	L->R	Neu 1	ICAM3_ITGB2	si:ch73-208g10.1_itgb2
18	Mac 9	L->R	Neu 1	IL16_CD4	il16_dicp1.3-4
18	Mac 9	L->R	Neu 1	IL16_CD4	il16_dicp3.3
18	Mac 9	L->R	Neu 1	IL16_CD4	il16_dicp3.1
18	Mac 9	L->R	Neu 1	IL1B_IL1R1	il1b_CABZ01054965.1
18	Mac 9	L->R	Neu 1	IL1B_IL1R1	il1b_zmp:0000000936
18	Mac 9	L->R	Neu 1	JAG2_NOTCH2	jag2b_notch2
18	Mac 9	L->R	Neu 1	JAG2_NOTCH2	jag1b_notch2
18	Mac 9	L->R	Neu 1	LRPAP1_SORT1	lrpap1_sort1b
18	Mac 9	L->R	Neu 1	MFGE8_ITGAV	mfge8b_itgav
18	Mac 9	L->R	Neu 1	MFNG_NOTCH2	mfng_notch2
18	Mac 9	L->R	Neu 1	MIF_CD74	mif_cd74a
18	Mac 9	L->R	Neu 1	MIF_CD74	mif_cd74b
18	Mac 9	L->R	Neu 1	MIF_CXCR4	mif_cxcr4a
18	Mac 9	L->R	Neu 1	MIF_CXCR4	mif_cxcr4b
18	Mac 9	L->R	Neu 1	NUCB2_ERAP1	nucb2a_erap1b
18	Mac 9	L->R	Neu 1	NUCB2_ERAP1	nucb2b_erap1b
18	Mac 9	L->R	Neu 1	PSAP_SORT1	psap_sort1b
18	Mac 9	L->R	Neu 1	RPS19_C5AR1	rps19_CABZ01041494.1
18	Mac 9	L->R	Neu 1	TNF_TNFRSF1B	tnfa_tnfrsf1b
18	Mac 9	L->R	Neu 1	TNF_TRADD	tnfa_tradd
18	Mac 9	L->R	Neu 1	TNF_TNFRSF1B	tnfb_tnfrsf1b
18	Mac 9	L->R	Neu 1	TNF_TRADD	tnfb_tradd
19	Mac 9	L->R	Neu 2	ADAM10_IL6R	adam10a_il6r
19	Mac 9	L->R	Neu 2	ADAM10_NOTCH2	adam10a_notch2
19	Mac 9	L->R	Neu 2	ADAM10_TSPAN14	adam10a_tspan14
19	Mac 9	L->R	Neu 2	ADAM17_IL6R	adam17a_il6r
19	Mac 9	L->R	Neu 2	ADAM17_ITGA5	adam17a_itga5
19	Mac 9	L->R	Neu 2	ADAM17_ITGB1	adam17a_itgb1b
19	Mac 9	L->R	Neu 2	ADM_GPR84	adma_gpr84
19	Mac 9	L->R	Neu 2	ARF6_SMAP1	arf6a_smap1
19	Mac 9	L->R	Neu 2	ARF6_SMAP1	arf6b_smap1
19	Mac 9	L->R	Neu 2	BSG_SELE	bsg_selp
19	Mac 9	L->R	Neu 2	CALM2_ABCA1	calm3a_abca1a
19	Mac 9	L->R	Neu 2	CALM2_ABCA1	calm3a_abca1b
19	Mac 9	L->R	Neu 2	CALM2_INSR	calm3a_insra
19	Mac 9	L->R	Neu 2	CALM2_KCNQ5	calm3a_kcnq5b
19	Mac 9	L->R	Neu 2	CALM2_ABCA1	calm2a_abca1a
19	Mac 9	L->R	Neu 2	CALM2_ABCA1	calm2a_abca1b
19	Mac 9	L->R	Neu 2	CALM2_INSR	calm2a_insra
19	Mac 9	L->R	Neu 2	CALM2_KCNQ5	calm2a_kcnq5b
19	Mac 9	L->R	Neu 2	CALR_ITGAV	calr_itgav
19	Mac 9	L->R	Neu 2	CD99_CD81	cd99_cd81a
19	Mac 9	L->R	Neu 2	CXCL9_CXCR3	cxcl11.6_cxcr3.3
19	Mac 9	L->R	Neu 2	CXCL9_CXCR3	cxcl11.5_cxcr3.3
19	Mac 9	L->R	Neu 2	CXCL9_CXCR3	BX323596.1_cxcr3.3
19	Mac 9	L->R	Neu 2	CXCL9_CXCR3	BX323596.2_cxcr3.3
19	Mac 9	L->R	Neu 2	F13A1_ITGA4	f13a1b_itga4
19	Mac 9	L->R	Neu 2	F13A1_ITGB1	f13a1b_itgb1b
19	Mac 9	L->R	Neu 2	GNAI2_ADCY7	gnai2b_adcy7
19	Mac 9	L->R	Neu 2	GNAI2_C5AR1	gnai2b_CABZ01041494.1
19	Mac 9	L->R	Neu 2	GNAI2_CXCR3	gnai2b_cxcr3.3
19	Mac 9	L->R	Neu 2	GNAI2_S1PR4	gnai2b_s1pr4
19	Mac 9	L->R	Neu 2	GNAI2_ADCY7	gnai2a_adcy7
19	Mac 9	L->R	Neu 2	GNAI2_C5AR1	gnai2a_CABZ01041494.1
19	Mac 9	L->R	Neu 2	GNAI2_CXCR3	gnai2a_cxcr3.3
19	Mac 9	L->R	Neu 2	GNAI2_S1PR4	gnai2a_s1pr4
19	Mac 9	L->R	Neu 2	GNAS_ADCY7	gnas_adcy7
19	Mac 9	L->R	Neu 2	GNAS_CRHR1	gnas_crhr1
19	Mac 9	L->R	Neu 2	GPI_AMFR	gpia_amfra
19	Mac 9	L->R	Neu 2	GRN_SORT1	grn1_sort1b
19	Mac 9	L->R	Neu 2	GRN_TNFRSF1A	grn1_fas
19	Mac 9	L->R	Neu 2	GRN_SORT1	grn2_sort1b
19	Mac 9	L->R	Neu 2	GRN_TNFRSF1A	grn2_fas
19	Mac 9	L->R	Neu 2	HBEGF_CD82	hbegfa_cd82a
19	Mac 9	L->R	Neu 2	HBEGF_CD82	hbegfa_cd82b
19	Mac 9	L->R	Neu 2	HMGB1_AGER	hmgb1b_si:ch211-79k12.1
19	Mac 9	L->R	Neu 2	HMGB1_CXCR4	hmgb1b_cxcr4a
19	Mac 9	L->R	Neu 2	HMGB1_CXCR4	hmgb1b_cxcr4b
19	Mac 9	L->R	Neu 2	HMGB1_AGER	hmgb1a_si:ch211-79k12.1
19	Mac 9	L->R	Neu 2	HMGB1_CXCR4	hmgb1a_cxcr4a
19	Mac 9	L->R	Neu 2	HMGB1_CXCR4	hmgb1a_cxcr4b
19	Mac 9	L->R	Neu 2	ICAM3_ITGB2	si:ch73-208g10.1_itgb2
19	Mac 9	L->R	Neu 2	IL16_CD4	il16_dicp1.3-4
19	Mac 9	L->R	Neu 2	IL16_CD4	il16_dicp3.3
19	Mac 9	L->R	Neu 2	IL16_CD4	il16_dicp3.1
19	Mac 9	L->R	Neu 2	IL16_CD4	il16_dicp2.2
19	Mac 9	L->R	Neu 2	IL1B_IL1R1	il1b_CABZ01054965.1
19	Mac 9	L->R	Neu 2	JAG2_NOTCH2	jag2b_notch2
19	Mac 9	L->R	Neu 2	JAG2_NOTCH2	jag1b_notch2
19	Mac 9	L->R	Neu 2	LRPAP1_SORT1	lrpap1_sort1b
19	Mac 9	L->R	Neu 2	MFGE8_ITGAV	mfge8b_itgav
19	Mac 9	L->R	Neu 2	MFNG_NOTCH2	mfng_notch2
19	Mac 9	L->R	Neu 2	MIF_CD74	mif_cd74a
19	Mac 9	L->R	Neu 2	MIF_CD74	mif_cd74b
19	Mac 9	L->R	Neu 2	MIF_CXCR4	mif_cxcr4a
19	Mac 9	L->R	Neu 2	MIF_CXCR4	mif_cxcr4b
19	Mac 9	L->R	Neu 2	NUCB2_ERAP1	nucb2a_erap1b
19	Mac 9	L->R	Neu 2	NUCB2_ERAP1	nucb2b_erap1b
19	Mac 9	L->R	Neu 2	PSAP_SORT1	psap_sort1b
19	Mac 9	L->R	Neu 2	RPS19_C5AR1	rps19_CABZ01041494.1
19	Mac 9	L->R	Neu 2	TNF_TNFRSF1A	tnfa_fas
19	Mac 9	L->R	Neu 2	TNF_TRADD	tnfa_tradd
19	Mac 9	L->R	Neu 2	TNF_TNFRSF1A	tnfb_fas
19	Mac 9	L->R	Neu 2	TNF_TRADD	tnfb_tradd

## Sheet: links for cytoscape PBS7d
7dpci_Mac-ligand to Neu-receptor
Cluster pair ID	macrophage	pair type	neutrophil	no. pairs	edge width	condition
0	Mac 1	L->R	Neu 1	17	3.4	PBS7d
1	Mac 1	L->R	Neu 2	23	4.6	PBS7d
2	Mac 2	L->R	Neu 1	48	9.6	PBS7d
3	Mac 2	L->R	Neu 2	59	11.8	PBS7d
4	Mac 3	L->R	Neu 1	15	3	PBS7d
5	Mac 3	L->R	Neu 2	21	4.2	PBS7d
6	Mac 4	L->R	Neu 1	26	5.2	PBS7d
7	Mac 4	L->R	Neu 2	33	6.6	PBS7d
8	Mac 5	L->R	Neu 1	14	2.8	PBS7d
9	Mac 5	L->R	Neu 2	23	4.6	PBS7d
10	Mac 6	L->R	Neu 1	22	4.4	PBS7d
11	Mac 6	L->R	Neu 2	31	6.2	PBS7d
12	Mac 7	L->R	Neu 1	26	5.2	PBS7d
13	Mac 7	L->R	Neu 2	33	6.6	PBS7d
14	MN	L->R	Neu 1	29	5.8	PBS7d
15	MN	L->R	Neu 2	38	7.6	PBS7d
16	Mac 8	L->R	Neu 1	58	11.6	PBS7d
17	Mac 8	L->R	Neu 2	70	14	PBS7d
18	Mac 9	L->R	Neu 1	20	4	PBS7d
19	Mac 9	L->R	Neu 2	28	5.6	PBS7d

## Sheet: links for cytoscape CL7d
7dpci_Mac-ligand to Neu-receptor
Cluster pair ID	macrophage	pair type	neutrophil	no. pairs	edge width	condition
0	Mac 1	L->R	Neu 1	18	3.6	CL7d
1	Mac 1	L->R	Neu 2	16	3.2	CL7d
2	Mac 2	L->R	Neu 1	28	5.6	CL7d
3	Mac 2	L->R	Neu 2	30	6	CL7d
4	Mac 3	L->R	Neu 1	35	7	CL7d
5	Mac 3	L->R	Neu 2	34	6.8	CL7d
6	Mac 4	L->R	Neu 1	22	4.4	CL7d
7	Mac 4	L->R	Neu 2	20	4	CL7d
8	Mac 5	L->R	Neu 1	15	3	CL7d
9	Mac 5	L->R	Neu 2	11	2.2	CL7d
10	Mac 6	L->R	Neu 1	21	4.2	CL7d
11	Mac 6	L->R	Neu 2	20	4	CL7d
12	Mac 7	L->R	Neu 1	29	5.8	CL7d
13	Mac 7	L->R	Neu 2	26	5.2	CL7d
14	MN	L->R	Neu 1	26	5.2	CL7d
15	MN	L->R	Neu 2	25	5	CL7d
16	Mac 8	L->R	Neu 1	28	5.6	CL7d
17	Mac 8	L->R	Neu 2	29	5.8	CL7d
18	Mac 9	L->R	Neu 1	20	4	CL7d
19	Mac 9	L->R	Neu 2	19	3.8	CL7d

## Sheet: links PBS7d + CL7d
7dpci_Mac-ligand to Neu-receptor
Cluster pair ID	macrophage	pair type	neutrophil	no. pairs	edge width	condition
0	Mac 1	L->R	Neu 1	17	3.4	PBS7d
1	Mac 1	L->R	Neu 2	23	4.6	PBS7d
2	Mac 2	L->R	Neu 1	48	9.6	PBS7d
3	Mac 2	L->R	Neu 2	59	11.8	PBS7d
4	Mac 3	L->R	Neu 1	15	3	PBS7d
5	Mac 3	L->R	Neu 2	21	4.2	PBS7d
6	Mac 4	L->R	Neu 1	26	5.2	PBS7d
7	Mac 4	L->R	Neu 2	33	6.6	PBS7d
8	Mac 5	L->R	Neu 1	14	2.8	PBS7d
9	Mac 5	L->R	Neu 2	23	4.6	PBS7d
10	Mac 6	L->R	Neu 1	22	4.4	PBS7d
11	Mac 6	L->R	Neu 2	31	6.2	PBS7d
12	Mac 7	L->R	Neu 1	26	5.2	PBS7d
13	Mac 7	L->R	Neu 2	33	6.6	PBS7d
14	MN	L->R	Neu 1	29	5.8	PBS7d
15	MN	L->R	Neu 2	38	7.6	PBS7d
16	Mac 8	L->R	Neu 1	58	11.6	PBS7d
17	Mac 8	L->R	Neu 2	70	14	PBS7d
18	Mac 9	L->R	Neu 1	20	4	PBS7d
19	Mac 9	L->R	Neu 2	28	5.6	PBS7d
0	Mac 1	L->R	Neu 1	18	3.6	CL7d
1	Mac 1	L->R	Neu 2	16	3.2	CL7d
2	Mac 2	L->R	Neu 1	28	5.6	CL7d
3	Mac 2	L->R	Neu 2	30	6	CL7d
4	Mac 3	L->R	Neu 1	35	7	CL7d
5	Mac 3	L->R	Neu 2	34	6.8	CL7d
6	Mac 4	L->R	Neu 1	22	4.4	CL7d
7	Mac 4	L->R	Neu 2	20	4	CL7d
8	Mac 5	L->R	Neu 1	15	3	CL7d
9	Mac 5	L->R	Neu 2	11	2.2	CL7d
10	Mac 6	L->R	Neu 1	21	4.2	CL7d
11	Mac 6	L->R	Neu 2	20	4	CL7d
12	Mac 7	L->R	Neu 1	29	5.8	CL7d
13	Mac 7	L->R	Neu 2	26	5.2	CL7d
14	MN	L->R	Neu 1	26	5.2	CL7d
15	MN	L->R	Neu 2	25	5	CL7d
16	Mac 8	L->R	Neu 1	28	5.6	CL7d
17	Mac 8	L->R	Neu 2	29	5.8	CL7d
18	Mac 9	L->R	Neu 1	20	4	CL7d
19	Mac 9	L->R	Neu 2	19	3.8	CL7d

## Sheet: links for cytoscape 7d common
7dpci_Mac-ligand to Neu-receptor
Cluster pair ID	macrophage	pair type	neutrophil	no. pairs	edge width	condition
0	Mac 1	L->R	Neu 1	100	10	7d common
1	Mac 1	L->R	Neu 2	108	10.8	7d common
2	Mac 2	L->R	Neu 1	88	8.8	7d common
3	Mac 2	L->R	Neu 2	94	9.4	7d common
4	Mac 3	L->R	Neu 1	93	9.3	7d common
5	Mac 3	L->R	Neu 2	100	10	7d common
6	Mac 4	L->R	Neu 1	93	9.3	7d common
7	Mac 4	L->R	Neu 2	99	9.9	7d common
8	Mac 5	L->R	Neu 1	93	9.3	7d common
9	Mac 5	L->R	Neu 2	98	9.8	7d common
10	Mac 6	L->R	Neu 1	88	8.8	7d common
11	Mac 6	L->R	Neu 2	93	9.3	7d common
12	Mac 7	L->R	Neu 1	85	8.5	7d common
13	Mac 7	L->R	Neu 2	92	9.2	7d common
14	MN	L->R	Neu 1	87	8.7	7d common
15	MN	L->R	Neu 2	92	9.2	7d common
16	Mac 8	L->R	Neu 1	49	4.9	7d common
17	Mac 8	L->R	Neu 2	53	5.3	7d common
18	Mac 9	L->R	Neu 1	70	7	7d common
19	Mac 9	L->R	Neu 2	72	7.2	7d common

## Sheet: nodes for cytoscape
7dpci_Mac-ligand to Neu-receptor
cluster ID	type	PBS7d	CL7d	7d common	total	size PBS7d	size CL7d	size PBS7d+CL7d	size 7d common	size total
Mac 1	ligand	40	34	208	282	20	17	7.4	20.8
Mac 2	ligand	107	58	182	347	53.5	29	16.5	18.2
Mac 3	ligand	36	69	193	298	18	34.5	10.5	19.3
Mac 4	ligand	59	42	192	293	29.5	21	10.1	19.2
Mac 5	ligand	37	26	191	254	18.5	13	6.3	19.1
Mac 6	ligand	53	41	181	275	26.5	20.5	9.4	18.1
Mac 7	ligand	59	55	177	291	29.5	27.5	11.4	17.7
MN	ligand	67	51	179	297	33.5	25.5	11.8	17.9
Mac 8	ligand	128	57	102	287	64	28.5	18.5	10.2
Mac 9	ligand	48	39	142	229	24	19.5	8.7	14.2
Neu 1	receptor	275	242	846	1363	27.5	24.2	51.7	84.6
Neu 2	receptor	359	230	901	1490	35.9	23	58.9	90.1
