# Supplementary material for: Comparative single-cell profiling reveals distinct cardiac resident macrophages essential for zebrafish heart regeneration
Source: eLife. 2023 Jul 27;12:e84679. doi: 10.7554/eLife.84679 (PMC10411971; doi:10.7554/eLife.84679)
Supplement: Figure 5—source data 4. [file elife-84679-fig5-data4.xlsx]

## Sheet: statistics
7dpci_Neu-ligand to Mac-receptor
Cluster pair ID	neutrophil	pair type	macrophage	PBS7d specific	CL7d specific	7d common	total
0	Neu 1	L->R	Mac 1	12	23	109	144
1	Neu 1	L->R	Mac 2	19	36	87	142
2	Neu 1	L->R	Mac 3	18	26	113	157
3	Neu 1	L->R	Mac 4	30	20	86	136
4	Neu 1	L->R	Mac 5	39	20	53	112
5	Neu 1	L->R	Mac 6	50	18	66	134
6	Neu 1	L->R	Mac 7	31	38	63	132
7	Neu 1	L->R	MN	28	42	72	142
8	Neu 1	L->R	Mac 8	65	28	41	134
9	Neu 1	L->R	Mac 9	27	32	87	146
10	Neu 2	L->R	Mac 1	16	10	107	133
11	Neu 2	L->R	Mac 2	21	27	86	134
12	Neu 2	L->R	Mac 3	20	11	114	145
13	Neu 2	L->R	Mac 4	31	9	87	127
14	Neu 2	L->R	Mac 5	39	11	54	104
15	Neu 2	L->R	Mac 6	54	5	66	125
16	Neu 2	L->R	Mac 7	33	23	64	120
17	Neu 2	L->R	MN	31	29	73	133
18	Neu 2	L->R	Mac 8	64	22	39	125
19	Neu 2	L->R	Mac 9	27	23	87	137
total pairs				655	453	1554	2662
mean				32.75	22.65	77.7
%				24.6056	17.0173	58.3772

## Sheet: PBS7d-specific
7dpci_Neu-ligand to Mac-receptor
Cluster pair ID	CT2	pair type	CT1	human L-R pair	L-R pair
0	Neu 1	L->R	Mac 1	APOE_SDC2	apoeb_sdc2
0	Neu 1	L->R	Mac 1	CXCL9_CXCR3	BX323596.1_cxcr3.3
0	Neu 1	L->R	Mac 1	F13A1_ITGA4	f13a1a.1_itga4
0	Neu 1	L->R	Mac 1	F13A1_ITGB1	f13a1a.1_itgb1b
0	Neu 1	L->R	Mac 1	FADD_ABCA1	fadd_abca1a
0	Neu 1	L->R	Mac 1	FADD_ABCA1	fadd_abca1b
0	Neu 1	L->R	Mac 1	FADD_TRADD	fadd_tradd
0	Neu 1	L->R	Mac 1	IL16_CD4	il16_cd4-1
0	Neu 1	L->R	Mac 1	IL1B_IL1R1	il1b_zmp:0000000936
0	Neu 1	L->R	Mac 1	IRAK4_TLR6	irak4_tlr1
0	Neu 1	L->R	Mac 1	TGFB1_SDC2	tgfb1b_sdc2
0	Neu 1	L->R	Mac 1	TNF_TNFRSF21	tnfb_tnfrsf21
1	Neu 1	L->R	Mac 2	ADAM10_NOTCH2	adam10a_si:ch73-281k2.5
1	Neu 1	L->R	Mac 2	ADM_RAMP2	adma_ramp2
1	Neu 1	L->R	Mac 2	BSG_SELE	bsg_selp
1	Neu 1	L->R	Mac 2	CXCL9_CXCR3	BX323596.1_cxcr3.3
1	Neu 1	L->R	Mac 2	F13A1_ITGA4	f13a1a.1_itga4
1	Neu 1	L->R	Mac 2	FADD_ABCA1	fadd_abca1a
1	Neu 1	L->R	Mac 2	FADD_ABCA1	fadd_abca1b
1	Neu 1	L->R	Mac 2	FADD_TRADD	fadd_tradd
1	Neu 1	L->R	Mac 2	GNAI2_P2RY12	gnai2b_p2ry12
1	Neu 1	L->R	Mac 2	GNAI2_P2RY12	gnai2a_p2ry12
1	Neu 1	L->R	Mac 2	GPI_AMFR	gpia_amfra
1	Neu 1	L->R	Mac 2	HBEGF_CD82	hbegfa_cd82a
1	Neu 1	L->R	Mac 2	HBEGF_CD82	hbegfb_cd82a
1	Neu 1	L->R	Mac 2	IL16_CD4	il16_cd4-1
1	Neu 1	L->R	Mac 2	INHBA_BAMBI	inhbaa_bambia
1	Neu 1	L->R	Mac 2	MFNG_NOTCH2	mfng_si:ch73-281k2.5
1	Neu 1	L->R	Mac 2	PSEN1_NOTCH2	psen1_si:ch73-281k2.5
1	Neu 1	L->R	Mac 2	RLN3_RAMP2	rln3a_ramp2
1	Neu 1	L->R	Mac 2	TNF_TNFRSF21	tnfb_tnfrsf21
2	Neu 1	L->R	Mac 3	ADAM17_ITGB1	adam17a_CABZ01058721.1
2	Neu 1	L->R	Mac 3	ADM_RAMP2	adma_ramp2
2	Neu 1	L->R	Mac 3	CALM2_KCNQ5	calm3a_kcnq5b
2	Neu 1	L->R	Mac 3	CALM2_KCNQ5	calm2a_kcnq5b
2	Neu 1	L->R	Mac 3	CXCL9_CXCR3	BX323596.1_cxcr3.3
2	Neu 1	L->R	Mac 3	F13A1_ITGB1	f13a1b_CABZ01058721.1
2	Neu 1	L->R	Mac 3	F13A1_ITGA4	f13a1a.1_itga4
2	Neu 1	L->R	Mac 3	F13A1_ITGB1	f13a1a.1_CABZ01058721.1
2	Neu 1	L->R	Mac 3	F13A1_ITGB1	f13a1a.1_itgb1b
2	Neu 1	L->R	Mac 3	FADD_ABCA1	fadd_abca1a
2	Neu 1	L->R	Mac 3	FADD_ABCA1	fadd_abca1b
2	Neu 1	L->R	Mac 3	FADD_TRADD	fadd_tradd
2	Neu 1	L->R	Mac 3	IL16_CD4	il16_dicp3.3
2	Neu 1	L->R	Mac 3	INHBA_BAMBI	inhbaa_bambia
2	Neu 1	L->R	Mac 3	RLN3_RAMP2	rln3a_ramp2
2	Neu 1	L->R	Mac 3	TGFB1_ITGB1	tgfb1b_CABZ01058721.1
2	Neu 1	L->R	Mac 3	TIMP2_ITGB1	timp2b_CABZ01058721.1
2	Neu 1	L->R	Mac 3	VEGFA_ITGB1	vegfab_CABZ01058721.1
3	Neu 1	L->R	Mac 4	ADAM17_ITGB1	adam17a_itgb1b
3	Neu 1	L->R	Mac 4	APOE_LRP1	apoeb_lrp1ab
3	Neu 1	L->R	Mac 4	APOE_SDC2	apoeb_sdc2
3	Neu 1	L->R	Mac 4	CALR_LRP1	calr_lrp1ab
3	Neu 1	L->R	Mac 4	CSF3_CSF1R	csf3b_csf1rb
3	Neu 1	L->R	Mac 4	CXCL9_CXCR3	BX323596.1_cxcr3.3
3	Neu 1	L->R	Mac 4	F13A1_ITGB1	f13a1b_itgb1b
3	Neu 1	L->R	Mac 4	F13A1_ITGA4	f13a1a.1_itga4
3	Neu 1	L->R	Mac 4	F13A1_ITGB1	f13a1a.1_itgb1b
3	Neu 1	L->R	Mac 4	FADD_ABCA1	fadd_abca1a
3	Neu 1	L->R	Mac 4	FADD_ABCA1	fadd_abca1b
3	Neu 1	L->R	Mac 4	FADD_TRADD	fadd_tradd
3	Neu 1	L->R	Mac 4	GNAI2_P2RY12	gnai2b_p2ry12
3	Neu 1	L->R	Mac 4	GNAI2_P2RY12	gnai2a_p2ry12
3	Neu 1	L->R	Mac 4	HSP90AA1_LRP1	hsp90aa1.2_lrp1ab
3	Neu 1	L->R	Mac 4	HSP90B1_LRP1	hsp90b1_lrp1ab
3	Neu 1	L->R	Mac 4	IL16_CD4	il16_cd4-1
3	Neu 1	L->R	Mac 4	IL16_CD4	il16_dicp3.3
3	Neu 1	L->R	Mac 4	IL1B_IL1R1	il1b_zmp:0000000936							TGFB1_ITGB1
3	Neu 1	L->R	Mac 4	INHBA_BAMBI	inhbaa_bambia							TGFB1_SDC2
3	Neu 1	L->R	Mac 4	IRAK4_TLR6	irak4_tlr1							HRAS_SDC2
3	Neu 1	L->R	Mac 4	LTF_LRP1	tfa_lrp1ab
3	Neu 1	L->R	Mac 4	MMP9_LRP1	mmp9_lrp1ab							CALR_lrp1 eat me signal in cancer
3	Neu 1	L->R	Mac 4	PSAP_LRP1	psap_lrp1ab							FADD apoptosis
3	Neu 1	L->R	Mac 4	RTN4_NGFR	rtn4a_ngfrb							INHBA_BAMBI
3	Neu 1	L->R	Mac 4	SERPINE2_LRP1	serpine2_lrp1ab							LTF_LRP1
3	Neu 1	L->R	Mac 4	TGFB1_ITGB1	tgfb1b_itgb1b							PSAP_LRP1
3	Neu 1	L->R	Mac 4	TGFB1_SDC2	tgfb1b_sdc2
3	Neu 1	L->R	Mac 4	TIMP2_ITGB1	timp2b_itgb1b
3	Neu 1	L->R	Mac 4	VEGFA_ITGB1	vegfab_itgb1b
4	Neu 1	L->R	Mac 5	ACTR2_ADRB2	actr2a_adrb2a
4	Neu 1	L->R	Mac 5	ADAM28_ITGA4	adam28_itga4
4	Neu 1	L->R	Mac 5	ADM_ADRB2	adma_adrb2a
4	Neu 1	L->R	Mac 5	APOE_LRP1	apoeb_lrp1ab
4	Neu 1	L->R	Mac 5	APOE_SDC2	apoeb_sdc2
4	Neu 1	L->R	Mac 5	ARPC5_ADRB2	arpc5a_adrb2a
4	Neu 1	L->R	Mac 5	ARPC5_ADRB2	arpc5b_adrb2a
4	Neu 1	L->R	Mac 5	CALM2_AQP1	calm3a_aqp1a.1
4	Neu 1	L->R	Mac 5	CALM2_AQP1	calm2a_aqp1a.1
4	Neu 1	L->R	Mac 5	CALR_ITGAV	calr_itgav
4	Neu 1	L->R	Mac 5	CALR_LRP1	calr_lrp1ab
4	Neu 1	L->R	Mac 5	CXCL9_CXCR3	BX323596.1_cxcr3.3
4	Neu 1	L->R	Mac 5	F13A1_ITGA4	f13a1b_itga4
4	Neu 1	L->R	Mac 5	F13A1_ITGA4	f13a1a.1_itga4
4	Neu 1	L->R	Mac 5	FADD_ABCA1	fadd_abca1a
4	Neu 1	L->R	Mac 5	FADD_ABCA1	fadd_abca1b
4	Neu 1	L->R	Mac 5	FADD_TRADD	fadd_tradd
4	Neu 1	L->R	Mac 5	GNAI2_P2RY12	gnai2b_p2ry12
4	Neu 1	L->R	Mac 5	GNAI2_P2RY12	gnai2a_p2ry12
4	Neu 1	L->R	Mac 5	GRN_TNFRSF1B	grn1_tnfrsf1b
4	Neu 1	L->R	Mac 5	GRN_TNFRSF1B	grn2_tnfrsf1b
4	Neu 1	L->R	Mac 5	HSP90AA1_LRP1	hsp90aa1.2_lrp1ab
4	Neu 1	L->R	Mac 5	HSP90B1_LRP1	hsp90b1_lrp1ab
4	Neu 1	L->R	Mac 5	HSPA8_ADRB2	hspa8_adrb2a
4	Neu 1	L->R	Mac 5	IL16_CD4	il16_dicp3.3
4	Neu 1	L->R	Mac 5	IL16_CD4	il16_dicp3.1
4	Neu 1	L->R	Mac 5	IL1B_ADRB2	il1b_adrb2a
4	Neu 1	L->R	Mac 5	IL1B_IL1R1	il1b_zmp:0000000936
4	Neu 1	L->R	Mac 5	INHBA_BAMBI	inhbaa_bambia
4	Neu 1	L->R	Mac 5	LTF_LRP1	tfa_lrp1ab
4	Neu 1	L->R	Mac 5	MMP9_LRP1	mmp9_lrp1ab
4	Neu 1	L->R	Mac 5	PSAP_LRP1	psap_lrp1ab
4	Neu 1	L->R	Mac 5	RLN3_ADRB2	rln3a_adrb2a
4	Neu 1	L->R	Mac 5	SERPINE2_LRP1	serpine2_lrp1ab
4	Neu 1	L->R	Mac 5	TGFB1_ITGAV	tgfb1b_itgav
4	Neu 1	L->R	Mac 5	TGFB1_SDC2	tgfb1b_sdc2
4	Neu 1	L->R	Mac 5	TNF_TNFRSF1B	tnfb_tnfrsf1b
4	Neu 1	L->R	Mac 5	VEGFA_ITGAV	vegfab_itgav
4	Neu 1	L->R	Mac 5	VEGFA_NRP1	vegfab_nrp1a
5	Neu 1	L->R	Mac 6	ACTR2_ADRB2	actr2a_adrb2a
5	Neu 1	L->R	Mac 6	ADAM10_NOTCH1	adam10a_notch1a
5	Neu 1	L->R	Mac 6	ADAM17_ITGB1	adam17a_itgb1b
5	Neu 1	L->R	Mac 6	ADAM17_NOTCH1	adam17a_notch1a
5	Neu 1	L->R	Mac 6	ADM_ADRB2	adma_adrb2a
5	Neu 1	L->R	Mac 6	ADM_RAMP2	adma_ramp2
5	Neu 1	L->R	Mac 6	APOE_SDC2	apoeb_sdc2
5	Neu 1	L->R	Mac 6	ARPC5_ADRB2	arpc5a_adrb2a
5	Neu 1	L->R	Mac 6	ARPC5_ADRB2	arpc5b_adrb2a
5	Neu 1	L->R	Mac 6	CXCL9_CXCR3	BX323596.1_cxcr3.3
5	Neu 1	L->R	Mac 6	F13A1_ITGB1	f13a1b_itgb1b
5	Neu 1	L->R	Mac 6	F13A1_ITGA4	f13a1a.1_itga4
5	Neu 1	L->R	Mac 6	F13A1_ITGB1	f13a1a.1_itgb1b
5	Neu 1	L->R	Mac 6	FADD_ABCA1	fadd_abca1a
5	Neu 1	L->R	Mac 6	FADD_ABCA1	fadd_abca1b
5	Neu 1	L->R	Mac 6	FADD_TRADD	fadd_tradd
5	Neu 1	L->R	Mac 6	GNAI2_P2RY12	gnai2b_p2ry12
5	Neu 1	L->R	Mac 6	GNAI2_P2RY12	gnai2a_p2ry12
5	Neu 1	L->R	Mac 6	GRN_SORT1	grn1_sort1b
5	Neu 1	L->R	Mac 6	GRN_TNFRSF1B	grn1_tnfrsf1b
5	Neu 1	L->R	Mac 6	GRN_SORT1	grn2_sort1b
5	Neu 1	L->R	Mac 6	GRN_TNFRSF1B	grn2_tnfrsf1b
5	Neu 1	L->R	Mac 6	HBEGF_CD82	hbegfa_cd82a
5	Neu 1	L->R	Mac 6	HBEGF_CD82	hbegfb_cd82a
5	Neu 1	L->R	Mac 6	HSPA8_ADRB2	hspa8_adrb2a
5	Neu 1	L->R	Mac 6	IL16_CD4	il16_cd4-1
5	Neu 1	L->R	Mac 6	IL16_CD4	il16_dicp3.3
5	Neu 1	L->R	Mac 6	IL1B_ADRB2	il1b_adrb2a
5	Neu 1	L->R	Mac 6	IL1B_IL1R1	il1b_CABZ01054965.1
5	Neu 1	L->R	Mac 6	IL1B_IL1R1	il1b_zmp:0000000936
5	Neu 1	L->R	Mac 6	INHBA_ACVR1B	inhbaa_acvr1ba
5	Neu 1	L->R	Mac 6	INHBA_ACVR2A	inhbaa_acvr2aa
5	Neu 1	L->R	Mac 6	INHBA_BAMBI	inhbaa_bambia
5	Neu 1	L->R	Mac 6	IRAK4_TLR6	irak4_tlr1
5	Neu 1	L->R	Mac 6	MFNG_NOTCH1	mfng_notch1a
5	Neu 1	L->R	Mac 6	PROS1_MERTK	pros1_mertka
5	Neu 1	L->R	Mac 6	PSAP_SORT1	psap_sort1b
5	Neu 1	L->R	Mac 6	PSEN1_NOTCH1	psen1_notch1a
5	Neu 1	L->R	Mac 6	RLN3_ADRB2	rln3a_adrb2a
5	Neu 1	L->R	Mac 6	RLN3_RAMP2	rln3a_ramp2
5	Neu 1	L->R	Mac 6	TGFB1_ACVRL1	tgfb1b_acvrl1
5	Neu 1	L->R	Mac 6	TGFB1_ITGB1	tgfb1b_itgb1b
5	Neu 1	L->R	Mac 6	TGFB1_SDC2	tgfb1b_sdc2
5	Neu 1	L->R	Mac 6	TIMP2_ITGB1	timp2b_itgb1b
5	Neu 1	L->R	Mac 6	TNF_NOTCH1	tnfb_notch1a
5	Neu 1	L->R	Mac 6	TNF_TNFRSF1B	tnfb_tnfrsf1b
5	Neu 1	L->R	Mac 6	TNF_TNFRSF21	tnfb_tnfrsf21
5	Neu 1	L->R	Mac 6	UBA52_NOTCH1	uba52_notch1a
5	Neu 1	L->R	Mac 6	VEGFA_ITGB1	vegfab_itgb1b
5	Neu 1	L->R	Mac 6	VEGFA_NRP1	vegfab_nrp1a
6	Neu 1	L->R	Mac 7	ADAM17_ITGB1	adam17a_itgb1b
6	Neu 1	L->R	Mac 7	ALOX5AP_ALOX5	alox5ap_alox5a
6	Neu 1	L->R	Mac 7	APOE_SCARB1	apoeb_scarb1
6	Neu 1	L->R	Mac 7	APOE_SDC2	apoeb_sdc2
6	Neu 1	L->R	Mac 7	CXCL9_CXCR3	BX323596.1_cxcr3.3
6	Neu 1	L->R	Mac 7	F13A1_ITGB1	f13a1b_itgb1b
6	Neu 1	L->R	Mac 7	F13A1_ITGA4	f13a1a.1_itga4
6	Neu 1	L->R	Mac 7	F13A1_ITGB1	f13a1a.1_CABZ01058721.1
6	Neu 1	L->R	Mac 7	F13A1_ITGB1	f13a1a.1_itgb1b
6	Neu 1	L->R	Mac 7	FADD_ABCA1	fadd_abca1a
6	Neu 1	L->R	Mac 7	FADD_ABCA1	fadd_abca1b
6	Neu 1	L->R	Mac 7	FADD_TRADD	fadd_tradd
6	Neu 1	L->R	Mac 7	FAM3C_LAMP1	fam3c_lamp1b
6	Neu 1	L->R	Mac 7	GNAI2_P2RY12	gnai2b_p2ry12
6	Neu 1	L->R	Mac 7	GNAI2_P2RY12	gnai2a_p2ry12
6	Neu 1	L->R	Mac 7	GPI_AMFR	gpia_amfra
6	Neu 1	L->R	Mac 7	GRN_TNFRSF1B	grn1_tnfrsf1b
6	Neu 1	L->R	Mac 7	GRN_TNFRSF1B	grn2_tnfrsf1b
6	Neu 1	L->R	Mac 7	HBEGF_CD82	hbegfa_cd82b
6	Neu 1	L->R	Mac 7	HBEGF_CD82	hbegfb_cd82b
6	Neu 1	L->R	Mac 7	INHBA_SMAD3	inhbaa_smad3a
6	Neu 1	L->R	Mac 7	IRAK4_TLR6	irak4_tlr1
6	Neu 1	L->R	Mac 7	PROS1_MERTK	pros1_mertka
6	Neu 1	L->R	Mac 7	PTGS2_ALOX5	ptgs2b_alox5a
6	Neu 1	L->R	Mac 7	TGFB1_ITGB1	tgfb1b_itgb1b
6	Neu 1	L->R	Mac 7	TGFB1_SDC2	tgfb1b_sdc2
6	Neu 1	L->R	Mac 7	TGFB1_SMAD3	tgfb1b_smad3a
6	Neu 1	L->R	Mac 7	TIMP2_ITGB1	timp2b_itgb1b
6	Neu 1	L->R	Mac 7	TNF_TNFRSF1B	tnfb_tnfrsf1b
6	Neu 1	L->R	Mac 7	VEGFA_ITGB1	vegfab_itgb1b
6	Neu 1	L->R	Mac 7	VEGFA_NRP2	vegfab_nrp2b
7	Neu 1	L->R	MN	ACTR2_ADRB2	actr2a_adrb2a
7	Neu 1	L->R	MN	ADM_ADRB2	adma_adrb2a
7	Neu 1	L->R	MN	ALOX5AP_ALOX5	alox5ap_alox5b.2
7	Neu 1	L->R	MN	ARPC5_ADRB2	arpc5a_adrb2a
7	Neu 1	L->R	MN	ARPC5_ADRB2	arpc5b_adrb2a
7	Neu 1	L->R	MN	CSF3_CSF1R	csf3b_csf1ra
7	Neu 1	L->R	MN	CXCL9_CXCR3	BX323596.1_cxcr3.3
7	Neu 1	L->R	MN	F13A1_ITGA4	f13a1a.1_itga4
7	Neu 1	L->R	MN	FADD_ABCA1	fadd_abca1a
7	Neu 1	L->R	MN	FADD_ABCA1	fadd_abca1b
7	Neu 1	L->R	MN	FADD_TRADD	fadd_tradd
7	Neu 1	L->R	MN	GNAI2_P2RY12	gnai2b_p2ry12
7	Neu 1	L->R	MN	GNAI2_P2RY12	gnai2a_p2ry12
7	Neu 1	L->R	MN	GPI_AMFR	gpia_amfra
7	Neu 1	L->R	MN	GRN_TNFRSF1B	grn1_tnfrsf1b
7	Neu 1	L->R	MN	GRN_TNFRSF1B	grn2_tnfrsf1b
7	Neu 1	L->R	MN	HSPA8_ADRB2	hspa8_adrb2a
7	Neu 1	L->R	MN	IL1B_ADRB2	il1b_adrb2a
7	Neu 1	L->R	MN	INHBA_BAMBI	inhbaa_bambia
7	Neu 1	L->R	MN	IRAK4_TLR6	irak4_tlr1
7	Neu 1	L->R	MN	PTGS2_ALOX5	ptgs2b_alox5b.2
7	Neu 1	L->R	MN	RLN3_ADRB2	rln3a_adrb2a
7	Neu 1	L->R	MN	RLN3_RXFP2	rln3a_rxfp2a
7	Neu 1	L->R	MN	TGFB1_ITGB5	tgfb1b_itgb5
7	Neu 1	L->R	MN	TLN1_ITGB5	tln1_itgb5
7	Neu 1	L->R	MN	TNF_TNFRSF1B	tnfb_tnfrsf1b
7	Neu 1	L->R	MN	VEGFA_NRP1	vegfab_nrp1a
7	Neu 1	L->R	MN	VEGFA_NRP2	vegfab_nrp2b
8	Neu 1	L->R	Mac 8	ACTR2_ADRB2	actr2a_adrb2a
8	Neu 1	L->R	Mac 8	ADAM10_GPNMB	adam10a_gpnmb
8	Neu 1	L->R	Mac 8	ADAM17_ITGA5	adam17a_itga5
8	Neu 1	L->R	Mac 8	ADAM17_ITGB1	adam17a_CABZ01058721.1
8	Neu 1	L->R	Mac 8	ADAM28_ITGA4	adam28_itga4
8	Neu 1	L->R	Mac 8	ADM_ADRB2	adma_adrb2a
8	Neu 1	L->R	Mac 8	ADM_RAMP2	adma_ramp2
8	Neu 1	L->R	Mac 8	APOE_LRP1	apoeb_lrp1ab
8	Neu 1	L->R	Mac 8	APOE_LRP5	apoeb_lrp5
8	Neu 1	L->R	Mac 8	APOE_SDC2	apoeb_sdc2
8	Neu 1	L->R	Mac 8	ARPC5_ADRB2	arpc5a_adrb2a
8	Neu 1	L->R	Mac 8	ARPC5_ADRB2	arpc5b_adrb2a
8	Neu 1	L->R	Mac 8	CALR_ITGAV	calr_itgav
8	Neu 1	L->R	Mac 8	CALR_LRP1	calr_lrp1ab
8	Neu 1	L->R	Mac 8	CALR_SCARF1	calr_scarf1
8	Neu 1	L->R	Mac 8	CSF3_CSF1R	csf3b_csf1ra
8	Neu 1	L->R	Mac 8	CSF3_CSF3R	csf3b_csf3r
8	Neu 1	L->R	Mac 8	CXCL9_CXCR3	BX323596.1_cxcr3.3
8	Neu 1	L->R	Mac 8	CXCL9_CXCR3	BX323596.2_cxcr3.3
8	Neu 1	L->R	Mac 8	F13A1_ITGA4	f13a1b_itga4
8	Neu 1	L->R	Mac 8	F13A1_ITGB1	f13a1b_CABZ01058721.1
8	Neu 1	L->R	Mac 8	F13A1_ITGA4	f13a1a.1_itga4
8	Neu 1	L->R	Mac 8	F13A1_ITGB1	f13a1a.1_CABZ01058721.1
8	Neu 1	L->R	Mac 8	FADD_ABCA1	fadd_abca1a
8	Neu 1	L->R	Mac 8	FADD_ABCA1	fadd_abca1b
8	Neu 1	L->R	Mac 8	FADD_TRADD	fadd_tradd
8	Neu 1	L->R	Mac 8	FAM3C_LAMP1	fam3c_lamp1b
8	Neu 1	L->R	Mac 8	GNAI2_ADCY7	gnai2b_adcy7
8	Neu 1	L->R	Mac 8	GNAI2_CXCR3	gnai2b_cxcr3.3
8	Neu 1	L->R	Mac 8	GNAI2_P2RY12	gnai2b_p2ry12
8	Neu 1	L->R	Mac 8	GNAI2_ADCY7	gnai2a_adcy7
8	Neu 1	L->R	Mac 8	GNAI2_CXCR3	gnai2a_cxcr3.3
8	Neu 1	L->R	Mac 8	GNAI2_P2RY12	gnai2a_p2ry12
8	Neu 1	L->R	Mac 8	GNAS_ADCY7	gnas_adcy7
8	Neu 1	L->R	Mac 8	GPI_AMFR	gpia_amfra
8	Neu 1	L->R	Mac 8	GRN_TNFRSF1B	grn1_tnfrsf1b
8	Neu 1	L->R	Mac 8	GRN_TNFRSF1B	grn2_tnfrsf1b
8	Neu 1	L->R	Mac 8	HSP90AA1_LRP1	hsp90aa1.2_lrp1ab
8	Neu 1	L->R	Mac 8	HSP90B1_LRP1	hsp90b1_lrp1ab
8	Neu 1	L->R	Mac 8	HSPA8_ADRB2	hspa8_adrb2a
8	Neu 1	L->R	Mac 8	IL16_CD4	il16_dicp3.3
8	Neu 1	L->R	Mac 8	IL16_CD4	il16_dicp2.1
8	Neu 1	L->R	Mac 8	IL1B_ADRB2	il1b_adrb2a
8	Neu 1	L->R	Mac 8	INHBA_SMAD3	inhbaa_smad3a
8	Neu 1	L->R	Mac 8	LTF_LRP1	tfa_lrp1ab
8	Neu 1	L->R	Mac 8	MMP9_LRP1	mmp9_lrp1ab
8	Neu 1	L->R	Mac 8	PROS1_MERTK	pros1_mertka
8	Neu 1	L->R	Mac 8	PSAP_LRP1	psap_lrp1ab
8	Neu 1	L->R	Mac 8	RLN3_ADRB2	rln3a_adrb2a
8	Neu 1	L->R	Mac 8	RLN3_RAMP2	rln3a_ramp2
8	Neu 1	L->R	Mac 8	SERPINE2_LRP1	serpine2_lrp1ab
8	Neu 1	L->R	Mac 8	TCTN1_TMEM67	tctn1_tmem67
8	Neu 1	L->R	Mac 8	TGFB1_ACVRL1	tgfb1b_acvr1l
8	Neu 1	L->R	Mac 8	TGFB1_ITGAV	tgfb1b_itgav
8	Neu 1	L->R	Mac 8	TGFB1_ITGB1	tgfb1b_CABZ01058721.1
8	Neu 1	L->R	Mac 8	TGFB1_ITGB5	tgfb1b_itgb5
8	Neu 1	L->R	Mac 8	TGFB1_SDC2	tgfb1b_sdc2
8	Neu 1	L->R	Mac 8	TGFB1_SMAD3	tgfb1b_smad3a
8	Neu 1	L->R	Mac 8	TIMP2_ITGB1	timp2b_CABZ01058721.1
8	Neu 1	L->R	Mac 8	TLN1_ITGB5	tln1_itgb5
8	Neu 1	L->R	Mac 8	TNF_TNFRSF1B	tnfb_tnfrsf1b
8	Neu 1	L->R	Mac 8	TNF_TRADD	tnfb_tradd
8	Neu 1	L->R	Mac 8	VEGFA_GPC1	vegfab_gpc1b
8	Neu 1	L->R	Mac 8	VEGFA_ITGAV	vegfab_itgav
8	Neu 1	L->R	Mac 8	VEGFA_ITGB1	vegfab_CABZ01058721.1
9	Neu 1	L->R	Mac 9	ADAM10_CD44	adam10a_cd44b
9	Neu 1	L->R	Mac 9	APOE_LRP8	apoeb_lrp8
9	Neu 1	L->R	Mac 9	F13A1_ITGB1	f13a1a.1_itgb1b.1
9	Neu 1	L->R	Mac 9	F13A1_ITGB1	f13a1a.1_itgb1a
9	Neu 1	L->R	Mac 9	FADD_ABCA1	fadd_abca1a
9	Neu 1	L->R	Mac 9	FADD_ABCA1	fadd_abca1b
9	Neu 1	L->R	Mac 9	FADD_TRADD	fadd_tradd
9	Neu 1	L->R	Mac 9	GNAI2_P2RY12	gnai2b_p2ry12
9	Neu 1	L->R	Mac 9	GNAI2_P2RY12	gnai2a_p2ry12
9	Neu 1	L->R	Mac 9	GNAS_CRHR1	gnas_crhr1
9	Neu 1	L->R	Mac 9	GPI_AMFR	gpia_amfra
9	Neu 1	L->R	Mac 9	GRN_TNFRSF1A	grn1_fas
9	Neu 1	L->R	Mac 9	GRN_TNFRSF1A	grn2_fas
9	Neu 1	L->R	Mac 9	HBEGF_CD44	hbegfa_cd44b
9	Neu 1	L->R	Mac 9	HBEGF_CD44	hbegfb_cd44b
9	Neu 1	L->R	Mac 9	IL16_CD4	il16_cd4-1
9	Neu 1	L->R	Mac 9	MIF_CD44	mif_cd44b
9	Neu 1	L->R	Mac 9	MMP1_CD44	mmp13a_cd44b
9	Neu 1	L->R	Mac 9	MMP9_CD44	mmp9_cd44b
9	Neu 1	L->R	Mac 9	PKM_CD44	pkma_cd44b
9	Neu 1	L->R	Mac 9	PSEN1_CD44	psen1_cd44b
9	Neu 1	L->R	Mac 9	TGFB1_TGFBR1	tgfb1b_tgfbr1b
9	Neu 1	L->R	Mac 9	TGFB1_TGFBR2	tgfb1b_tgfbr2a
9	Neu 1	L->R	Mac 9	TIMP2_CD44	timp2b_cd44b
9	Neu 1	L->R	Mac 9	TNF_TNFRSF1A	tnfb_fas
9	Neu 1	L->R	Mac 9	UBA52_TGFBR1	uba52_tgfbr1b
9	Neu 1	L->R	Mac 9	UBA52_TGFBR2	uba52_tgfbr2a
10	Neu 2	L->R	Mac 1	CXCL9_CXCR3	cxcl11.6_cxcr3.3
10	Neu 2	L->R	Mac 1	CXCL9_CXCR3	cxcl11.5_cxcr3.3
10	Neu 2	L->R	Mac 1	F13A1_ITGA4	f13a1a.1_itga4
10	Neu 2	L->R	Mac 1	F13A1_ITGB1	f13a1a.1_itgb1b
10	Neu 2	L->R	Mac 1	HRAS_SDC2	hrasb_sdc2
10	Neu 2	L->R	Mac 1	IGF2_IGF2R	igf2b_igf2r
10	Neu 2	L->R	Mac 1	IGF2_INSR	igf2b_insra
10	Neu 2	L->R	Mac 1	IL15_IL15RA	il15l_il15ra
10	Neu 2	L->R	Mac 1	IL15_IL2RB	il15l_csf2rb
10	Neu 2	L->R	Mac 1	IL15_IL2RB	il15l_il21r.1
10	Neu 2	L->R	Mac 1	IL16_CD4	il16_cd4-1
10	Neu 2	L->R	Mac 1	IL1B_IL1R1	il1b_zmp:0000000936
10	Neu 2	L->R	Mac 1	IRAK4_TLR6	irak4_tlr1
10	Neu 2	L->R	Mac 1	TGFB1_SDC2	tgfb1b_sdc2
10	Neu 2	L->R	Mac 1	TNF_TNFRSF21	tnfa_tnfrsf21
10	Neu 2	L->R	Mac 1	TNF_TNFRSF21	tnfb_tnfrsf21
11	Neu 2	L->R	Mac 2	ADAM10_NOTCH2	adam10a_si:ch73-281k2.5
11	Neu 2	L->R	Mac 2	ADM_RAMP2	adma_ramp2
11	Neu 2	L->R	Mac 2	BSG_SELE	bsg_selp
11	Neu 2	L->R	Mac 2	CXCL9_CXCR3	cxcl11.6_cxcr3.3
11	Neu 2	L->R	Mac 2	CXCL9_CXCR3	cxcl11.5_cxcr3.3
11	Neu 2	L->R	Mac 2	F13A1_ITGA4	f13a1a.1_itga4
11	Neu 2	L->R	Mac 2	GNAI2_P2RY12	gnai2b_p2ry12
11	Neu 2	L->R	Mac 2	GNAI2_P2RY12	gnai2a_p2ry12
11	Neu 2	L->R	Mac 2	GPI_AMFR	gpia_amfra
11	Neu 2	L->R	Mac 2	HBEGF_CD82	hbegfa_cd82a
11	Neu 2	L->R	Mac 2	HBEGF_CD82	hbegfb_cd82a
11	Neu 2	L->R	Mac 2	IGF2_IGF2R	igf2b_igf2r
11	Neu 2	L->R	Mac 2	IL15_IL15RA	il15l_il15ra
11	Neu 2	L->R	Mac 2	IL15_IL2RB	il15l_csf2rb
11	Neu 2	L->R	Mac 2	IL15_IL2RB	il15l_il21r.1
11	Neu 2	L->R	Mac 2	IL16_CD4	il16_cd4-1
11	Neu 2	L->R	Mac 2	INHBA_BAMBI	inhbaa_bambia
11	Neu 2	L->R	Mac 2	MFNG_NOTCH2	mfng_si:ch73-281k2.5
11	Neu 2	L->R	Mac 2	PSEN1_NOTCH2	psen1_si:ch73-281k2.5
11	Neu 2	L->R	Mac 2	TNF_TNFRSF21	tnfa_tnfrsf21
11	Neu 2	L->R	Mac 2	TNF_TNFRSF21	tnfb_tnfrsf21
12	Neu 2	L->R	Mac 3	ADAM17_ITGB1	adam17a_CABZ01058721.1
12	Neu 2	L->R	Mac 3	ADM_RAMP2	adma_ramp2
12	Neu 2	L->R	Mac 3	CALM2_KCNQ5	calm3a_kcnq5b
12	Neu 2	L->R	Mac 3	CALM2_KCNQ5	calm2a_kcnq5b
12	Neu 2	L->R	Mac 3	CXCL9_CXCR3	cxcl11.6_cxcr3.3
12	Neu 2	L->R	Mac 3	CXCL9_CXCR3	cxcl11.5_cxcr3.3
12	Neu 2	L->R	Mac 3	F13A1_ITGB1	f13a1b_CABZ01058721.1
12	Neu 2	L->R	Mac 3	F13A1_ITGA4	f13a1a.1_itga4
12	Neu 2	L->R	Mac 3	F13A1_ITGB1	f13a1a.1_CABZ01058721.1
12	Neu 2	L->R	Mac 3	F13A1_ITGB1	f13a1a.1_itgb1b
12	Neu 2	L->R	Mac 3	IGF2_IGF2R	igf2b_igf2r
12	Neu 2	L->R	Mac 3	IGF2_INSR	igf2b_insra
12	Neu 2	L->R	Mac 3	IL15_IL15RA	il15l_il15ra
12	Neu 2	L->R	Mac 3	IL15_IL2RB	il15l_csf2rb
12	Neu 2	L->R	Mac 3	IL15_IL2RB	il15l_il21r.1
12	Neu 2	L->R	Mac 3	IL16_CD4	il16_dicp3.3
12	Neu 2	L->R	Mac 3	INHBA_BAMBI	inhbaa_bambia
12	Neu 2	L->R	Mac 3	TGFB1_ITGB1	tgfb1b_CABZ01058721.1
12	Neu 2	L->R	Mac 3	TIMP2_ITGB1	timp2b_CABZ01058721.1
12	Neu 2	L->R	Mac 3	VEGFA_ITGB1	vegfab_CABZ01058721.1
13	Neu 2	L->R	Mac 4	ADAM17_ITGB1	adam17a_itgb1b
13	Neu 2	L->R	Mac 4	CSF3_CSF1R	csf3a_csf1rb
13	Neu 2	L->R	Mac 4	CSF3_CSF1R	csf3b_csf1rb
13	Neu 2	L->R	Mac 4	CXCL9_CXCR3	cxcl11.6_cxcr3.3
13	Neu 2	L->R	Mac 4	CXCL9_CXCR3	cxcl11.5_cxcr3.3
13	Neu 2	L->R	Mac 4	F13A1_ITGB1	f13a1b_itgb1b
13	Neu 2	L->R	Mac 4	F13A1_ITGA4	f13a1a.1_itga4
13	Neu 2	L->R	Mac 4	F13A1_ITGB1	f13a1a.1_itgb1b
13	Neu 2	L->R	Mac 4	GNAI2_P2RY12	gnai2b_p2ry12
13	Neu 2	L->R	Mac 4	GNAI2_P2RY12	gnai2a_p2ry12
13	Neu 2	L->R	Mac 4	HRAS_SDC2	hrasb_sdc2
13	Neu 2	L->R	Mac 4	HSP90AA1_LRP1	hsp90aa1.2_lrp1ab
13	Neu 2	L->R	Mac 4	HSP90B1_LRP1	hsp90b1_lrp1ab
13	Neu 2	L->R	Mac 4	IGF2_IGF2R	igf2b_igf2r
13	Neu 2	L->R	Mac 4	IL15_IL15RA	il15l_il15ra
13	Neu 2	L->R	Mac 4	IL15_IL2RB	il15l_csf2rb
13	Neu 2	L->R	Mac 4	IL15_IL2RB	il15l_il21r.1
13	Neu 2	L->R	Mac 4	IL16_CD4	il16_cd4-1
13	Neu 2	L->R	Mac 4	IL16_CD4	il16_dicp3.3
13	Neu 2	L->R	Mac 4	IL1B_IL1R1	il1b_zmp:0000000936
13	Neu 2	L->R	Mac 4	INHBA_BAMBI	inhbaa_bambia
13	Neu 2	L->R	Mac 4	IRAK4_TLR6	irak4_tlr1
13	Neu 2	L->R	Mac 4	LTF_LRP1	tfa_lrp1ab
13	Neu 2	L->R	Mac 4	MMP9_LRP1	mmp9_lrp1ab
13	Neu 2	L->R	Mac 4	PSAP_LRP1	psap_lrp1ab
13	Neu 2	L->R	Mac 4	RTN4_NGFR	rtn4a_ngfrb
13	Neu 2	L->R	Mac 4	SERPINE2_LRP1	serpine2_lrp1ab
13	Neu 2	L->R	Mac 4	TGFB1_ITGB1	tgfb1b_itgb1b
13	Neu 2	L->R	Mac 4	TGFB1_SDC2	tgfb1b_sdc2
13	Neu 2	L->R	Mac 4	TIMP2_ITGB1	timp2b_itgb1b
13	Neu 2	L->R	Mac 4	VEGFA_ITGB1	vegfab_itgb1b
14	Neu 2	L->R	Mac 5	ACTR2_ADRB2	actr2a_adrb2a
14	Neu 2	L->R	Mac 5	ACTR2_ADRB2	actr2b_adrb2a
14	Neu 2	L->R	Mac 5	ADAM28_ITGA4	adam28_itga4
14	Neu 2	L->R	Mac 5	ADM_ADRB2	adma_adrb2a
14	Neu 2	L->R	Mac 5	ARPC5_ADRB2	arpc5a_adrb2a
14	Neu 2	L->R	Mac 5	ARPC5_ADRB2	arpc5b_adrb2a
14	Neu 2	L->R	Mac 5	CALM2_AQP1	calm3a_aqp1a.1
14	Neu 2	L->R	Mac 5	CALM2_AQP1	calm2a_aqp1a.1
14	Neu 2	L->R	Mac 5	CXCL9_CXCR3	cxcl11.6_cxcr3.3
14	Neu 2	L->R	Mac 5	CXCL9_CXCR3	cxcl11.5_cxcr3.3
14	Neu 2	L->R	Mac 5	F13A1_ITGA4	f13a1b_itga4
14	Neu 2	L->R	Mac 5	F13A1_ITGA4	f13a1a.1_itga4
14	Neu 2	L->R	Mac 5	GNAI2_P2RY12	gnai2b_p2ry12
14	Neu 2	L->R	Mac 5	GNAI2_P2RY12	gnai2a_p2ry12
14	Neu 2	L->R	Mac 5	GRN_TNFRSF1B	grn1_tnfrsf1b
14	Neu 2	L->R	Mac 5	GRN_TNFRSF1B	grn2_tnfrsf1b
14	Neu 2	L->R	Mac 5	HRAS_SDC2	hrasb_sdc2
14	Neu 2	L->R	Mac 5	HSP90AA1_LRP1	hsp90aa1.2_lrp1ab
14	Neu 2	L->R	Mac 5	HSP90B1_LRP1	hsp90b1_lrp1ab
14	Neu 2	L->R	Mac 5	HSPA8_ADRB2	hspa8_adrb2a
14	Neu 2	L->R	Mac 5	IGF2_IGF2R	igf2b_igf2r
14	Neu 2	L->R	Mac 5	IL15_IL15RA	il15l_il15ra
14	Neu 2	L->R	Mac 5	IL15_IL2RB	il15l_csf2rb
14	Neu 2	L->R	Mac 5	IL15_IL2RB	il15l_il21r.1
14	Neu 2	L->R	Mac 5	IL16_CD4	il16_dicp3.3
14	Neu 2	L->R	Mac 5	IL16_CD4	il16_dicp3.1
14	Neu 2	L->R	Mac 5	IL1B_ADRB2	il1b_adrb2a
14	Neu 2	L->R	Mac 5	IL1B_IL1R1	il1b_zmp:0000000936
14	Neu 2	L->R	Mac 5	INHBA_BAMBI	inhbaa_bambia
14	Neu 2	L->R	Mac 5	LTF_LRP1	tfa_lrp1ab
14	Neu 2	L->R	Mac 5	MMP9_LRP1	mmp9_lrp1ab
14	Neu 2	L->R	Mac 5	PSAP_LRP1	psap_lrp1ab
14	Neu 2	L->R	Mac 5	SERPINE2_LRP1	serpine2_lrp1ab
14	Neu 2	L->R	Mac 5	TGFB1_ITGAV	tgfb1b_itgav
14	Neu 2	L->R	Mac 5	TGFB1_SDC2	tgfb1b_sdc2
14	Neu 2	L->R	Mac 5	TNF_TNFRSF1B	tnfa_tnfrsf1b
14	Neu 2	L->R	Mac 5	TNF_TNFRSF1B	tnfb_tnfrsf1b
14	Neu 2	L->R	Mac 5	VEGFA_ITGAV	vegfab_itgav
14	Neu 2	L->R	Mac 5	VEGFA_NRP1	vegfab_nrp1a
15	Neu 2	L->R	Mac 6	ACTR2_ADRB2	actr2a_adrb2a
15	Neu 2	L->R	Mac 6	ACTR2_ADRB2	actr2b_adrb2a
15	Neu 2	L->R	Mac 6	ADAM10_NOTCH1	adam10a_notch1a
15	Neu 2	L->R	Mac 6	ADAM17_ITGB1	adam17a_itgb1b
15	Neu 2	L->R	Mac 6	ADAM17_NOTCH1	adam17a_notch1a
15	Neu 2	L->R	Mac 6	ADM_ADRB2	adma_adrb2a
15	Neu 2	L->R	Mac 6	ADM_RAMP2	adma_ramp2
15	Neu 2	L->R	Mac 6	ARPC5_ADRB2	arpc5a_adrb2a
15	Neu 2	L->R	Mac 6	ARPC5_ADRB2	arpc5b_adrb2a
15	Neu 2	L->R	Mac 6	CXCL9_CXCR3	cxcl11.6_cxcr3.3
15	Neu 2	L->R	Mac 6	CXCL9_CXCR3	cxcl11.5_cxcr3.3
15	Neu 2	L->R	Mac 6	F13A1_ITGB1	f13a1b_itgb1b
15	Neu 2	L->R	Mac 6	F13A1_ITGA4	f13a1a.1_itga4
15	Neu 2	L->R	Mac 6	F13A1_ITGB1	f13a1a.1_itgb1b
15	Neu 2	L->R	Mac 6	GNAI2_P2RY12	gnai2b_p2ry12
15	Neu 2	L->R	Mac 6	GNAI2_P2RY12	gnai2a_p2ry12
15	Neu 2	L->R	Mac 6	GRN_SORT1	grn1_sort1b
15	Neu 2	L->R	Mac 6	GRN_TNFRSF1B	grn1_tnfrsf1b
15	Neu 2	L->R	Mac 6	GRN_SORT1	grn2_sort1b
15	Neu 2	L->R	Mac 6	GRN_TNFRSF1B	grn2_tnfrsf1b
15	Neu 2	L->R	Mac 6	HBEGF_CD82	hbegfa_cd82a
15	Neu 2	L->R	Mac 6	HBEGF_CD82	hbegfb_cd82a
15	Neu 2	L->R	Mac 6	HRAS_SDC2	hrasb_sdc2
15	Neu 2	L->R	Mac 6	HSPA8_ADRB2	hspa8_adrb2a
15	Neu 2	L->R	Mac 6	IGF2_IGF2R	igf2b_igf2r
15	Neu 2	L->R	Mac 6	IL15_IL15RA	il15l_il15ra
15	Neu 2	L->R	Mac 6	IL15_IL2RB	il15l_csf2rb
15	Neu 2	L->R	Mac 6	IL15_IL2RB	il15l_il21r.1
15	Neu 2	L->R	Mac 6	IL16_CD4	il16_cd4-1
15	Neu 2	L->R	Mac 6	IL16_CD4	il16_dicp3.3
15	Neu 2	L->R	Mac 6	IL1B_ADRB2	il1b_adrb2a
15	Neu 2	L->R	Mac 6	IL1B_IL1R1	il1b_CABZ01054965.1
15	Neu 2	L->R	Mac 6	IL1B_IL1R1	il1b_zmp:0000000936
15	Neu 2	L->R	Mac 6	INHBA_ACVR1B	inhbaa_acvr1ba
15	Neu 2	L->R	Mac 6	INHBA_ACVR2A	inhbaa_acvr2aa
15	Neu 2	L->R	Mac 6	INHBA_BAMBI	inhbaa_bambia
15	Neu 2	L->R	Mac 6	IRAK4_TLR6	irak4_tlr1
15	Neu 2	L->R	Mac 6	MFNG_NOTCH1	mfng_notch1a
15	Neu 2	L->R	Mac 6	PROS1_MERTK	pros1_mertka
15	Neu 2	L->R	Mac 6	PSAP_SORT1	psap_sort1b
15	Neu 2	L->R	Mac 6	PSEN1_NOTCH1	psen1_notch1a
15	Neu 2	L->R	Mac 6	TGFB1_ACVRL1	tgfb1b_acvrl1
15	Neu 2	L->R	Mac 6	TGFB1_ITGB1	tgfb1b_itgb1b
15	Neu 2	L->R	Mac 6	TGFB1_SDC2	tgfb1b_sdc2
15	Neu 2	L->R	Mac 6	TIMP2_ITGB1	timp2b_itgb1b
15	Neu 2	L->R	Mac 6	TNF_NOTCH1	tnfa_notch1a
15	Neu 2	L->R	Mac 6	TNF_TNFRSF1B	tnfa_tnfrsf1b
15	Neu 2	L->R	Mac 6	TNF_TNFRSF21	tnfa_tnfrsf21
15	Neu 2	L->R	Mac 6	TNF_NOTCH1	tnfb_notch1a
15	Neu 2	L->R	Mac 6	TNF_TNFRSF1B	tnfb_tnfrsf1b
15	Neu 2	L->R	Mac 6	TNF_TNFRSF21	tnfb_tnfrsf21
15	Neu 2	L->R	Mac 6	UBA52_NOTCH1	uba52_notch1a
15	Neu 2	L->R	Mac 6	VEGFA_ITGB1	vegfab_itgb1b
15	Neu 2	L->R	Mac 6	VEGFA_NRP1	vegfab_nrp1a
16	Neu 2	L->R	Mac 7	ADAM17_ITGB1	adam17a_itgb1b
16	Neu 2	L->R	Mac 7	ALOX5AP_ALOX5	alox5ap_alox5a
16	Neu 2	L->R	Mac 7	CXCL9_CXCR3	cxcl11.6_cxcr3.3
16	Neu 2	L->R	Mac 7	CXCL9_CXCR3	cxcl11.5_cxcr3.3
16	Neu 2	L->R	Mac 7	F13A1_ITGB1	f13a1b_itgb1b
16	Neu 2	L->R	Mac 7	F13A1_ITGA4	f13a1a.1_itga4
16	Neu 2	L->R	Mac 7	F13A1_ITGB1	f13a1a.1_CABZ01058721.1
16	Neu 2	L->R	Mac 7	F13A1_ITGB1	f13a1a.1_itgb1b
16	Neu 2	L->R	Mac 7	FAM3C_LAMP1	fam3c_lamp1b
16	Neu 2	L->R	Mac 7	GNAI2_P2RY12	gnai2b_p2ry12
16	Neu 2	L->R	Mac 7	GNAI2_P2RY12	gnai2a_p2ry12
16	Neu 2	L->R	Mac 7	GPI_AMFR	gpia_amfra
16	Neu 2	L->R	Mac 7	GRN_TNFRSF1B	grn1_tnfrsf1b
16	Neu 2	L->R	Mac 7	GRN_TNFRSF1B	grn2_tnfrsf1b
16	Neu 2	L->R	Mac 7	HBEGF_CD82	hbegfa_cd82b
16	Neu 2	L->R	Mac 7	HBEGF_CD82	hbegfb_cd82b
16	Neu 2	L->R	Mac 7	HRAS_SDC2	hrasb_sdc2
16	Neu 2	L->R	Mac 7	IGF2_IGF2R	igf2b_igf2r
16	Neu 2	L->R	Mac 7	IL15_IL15RA	il15l_il15ra
16	Neu 2	L->R	Mac 7	IL15_IL2RB	il15l_csf2rb
16	Neu 2	L->R	Mac 7	IL15_IL2RB	il15l_il21r.1
16	Neu 2	L->R	Mac 7	INHBA_SMAD3	inhbaa_smad3a
16	Neu 2	L->R	Mac 7	IRAK4_TLR6	irak4_tlr1
16	Neu 2	L->R	Mac 7	PROS1_MERTK	pros1_mertka
16	Neu 2	L->R	Mac 7	PTGS2_ALOX5	ptgs2b_alox5a
16	Neu 2	L->R	Mac 7	TGFB1_ITGB1	tgfb1b_itgb1b
16	Neu 2	L->R	Mac 7	TGFB1_SDC2	tgfb1b_sdc2
16	Neu 2	L->R	Mac 7	TGFB1_SMAD3	tgfb1b_smad3a
16	Neu 2	L->R	Mac 7	TIMP2_ITGB1	timp2b_itgb1b
16	Neu 2	L->R	Mac 7	TNF_TNFRSF1B	tnfa_tnfrsf1b
16	Neu 2	L->R	Mac 7	TNF_TNFRSF1B	tnfb_tnfrsf1b
16	Neu 2	L->R	Mac 7	VEGFA_ITGB1	vegfab_itgb1b
16	Neu 2	L->R	Mac 7	VEGFA_NRP2	vegfab_nrp2b
17	Neu 2	L->R	MN	ACTR2_ADRB2	actr2a_adrb2a
17	Neu 2	L->R	MN	ACTR2_ADRB2	actr2b_adrb2a
17	Neu 2	L->R	MN	ADM_ADRB2	adma_adrb2a
17	Neu 2	L->R	MN	ALOX5AP_ALOX5	alox5ap_alox5b.2
17	Neu 2	L->R	MN	ARPC5_ADRB2	arpc5a_adrb2a
17	Neu 2	L->R	MN	ARPC5_ADRB2	arpc5b_adrb2a
17	Neu 2	L->R	MN	CSF3_CSF1R	csf3a_csf1ra
17	Neu 2	L->R	MN	CSF3_CSF1R	csf3b_csf1ra
17	Neu 2	L->R	MN	CXCL9_CXCR3	cxcl11.6_cxcr3.3
17	Neu 2	L->R	MN	CXCL9_CXCR3	cxcl11.5_cxcr3.3
17	Neu 2	L->R	MN	F13A1_ITGA4	f13a1a.1_itga4
17	Neu 2	L->R	MN	GNAI2_P2RY12	gnai2b_p2ry12
17	Neu 2	L->R	MN	GNAI2_P2RY12	gnai2a_p2ry12
17	Neu 2	L->R	MN	GPI_AMFR	gpia_amfra
17	Neu 2	L->R	MN	GRN_TNFRSF1B	grn1_tnfrsf1b
17	Neu 2	L->R	MN	GRN_TNFRSF1B	grn2_tnfrsf1b
17	Neu 2	L->R	MN	HSPA8_ADRB2	hspa8_adrb2a
17	Neu 2	L->R	MN	IGF2_IGF2R	igf2b_igf2r
17	Neu 2	L->R	MN	IL15_IL15RA	il15l_il15ra
17	Neu 2	L->R	MN	IL15_IL2RB	il15l_csf2rb
17	Neu 2	L->R	MN	IL15_IL2RB	il15l_il21r.1
17	Neu 2	L->R	MN	IL1B_ADRB2	il1b_adrb2a
17	Neu 2	L->R	MN	INHBA_BAMBI	inhbaa_bambia
17	Neu 2	L->R	MN	IRAK4_TLR6	irak4_tlr1
17	Neu 2	L->R	MN	PTGS2_ALOX5	ptgs2b_alox5b.2
17	Neu 2	L->R	MN	TGFB1_ITGB5	tgfb1b_itgb5
17	Neu 2	L->R	MN	TLN1_ITGB5	tln1_itgb5
17	Neu 2	L->R	MN	TNF_TNFRSF1B	tnfa_tnfrsf1b
17	Neu 2	L->R	MN	TNF_TNFRSF1B	tnfb_tnfrsf1b
17	Neu 2	L->R	MN	VEGFA_NRP1	vegfab_nrp1a
17	Neu 2	L->R	MN	VEGFA_NRP2	vegfab_nrp2b
18	Neu 2	L->R	Mac 8	ACTR2_ADRB2	actr2a_adrb2a
18	Neu 2	L->R	Mac 8	ACTR2_ADRB2	actr2b_adrb2a
18	Neu 2	L->R	Mac 8	ADAM10_GPNMB	adam10a_gpnmb
18	Neu 2	L->R	Mac 8	ADAM17_ITGA5	adam17a_itga5
18	Neu 2	L->R	Mac 8	ADAM17_ITGB1	adam17a_CABZ01058721.1
18	Neu 2	L->R	Mac 8	ADAM28_ITGA4	adam28_itga4
18	Neu 2	L->R	Mac 8	ADM_ADRB2	adma_adrb2a
18	Neu 2	L->R	Mac 8	ADM_RAMP2	adma_ramp2
18	Neu 2	L->R	Mac 8	ARPC5_ADRB2	arpc5a_adrb2a
18	Neu 2	L->R	Mac 8	ARPC5_ADRB2	arpc5b_adrb2a
18	Neu 2	L->R	Mac 8	CSF3_CSF1R	csf3a_csf1ra
18	Neu 2	L->R	Mac 8	CSF3_CSF3R	csf3a_csf3r
18	Neu 2	L->R	Mac 8	CSF3_CSF1R	csf3b_csf1ra
18	Neu 2	L->R	Mac 8	CSF3_CSF3R	csf3b_csf3r
18	Neu 2	L->R	Mac 8	CXCL9_CXCR3	cxcl11.6_cxcr3.3
18	Neu 2	L->R	Mac 8	CXCL9_CXCR3	cxcl11.5_cxcr3.3
18	Neu 2	L->R	Mac 8	CXCL9_CXCR3	BX323596.1_cxcr3.3
18	Neu 2	L->R	Mac 8	CXCL9_CXCR3	BX323596.2_cxcr3.3
18	Neu 2	L->R	Mac 8	F13A1_ITGA4	f13a1b_itga4
18	Neu 2	L->R	Mac 8	F13A1_ITGB1	f13a1b_CABZ01058721.1
18	Neu 2	L->R	Mac 8	F13A1_ITGA4	f13a1a.1_itga4
18	Neu 2	L->R	Mac 8	F13A1_ITGB1	f13a1a.1_CABZ01058721.1
18	Neu 2	L->R	Mac 8	FAM3C_LAMP1	fam3c_lamp1b
18	Neu 2	L->R	Mac 8	GNAI2_ADCY7	gnai2b_adcy7
18	Neu 2	L->R	Mac 8	GNAI2_CXCR3	gnai2b_cxcr3.3
18	Neu 2	L->R	Mac 8	GNAI2_P2RY12	gnai2b_p2ry12
18	Neu 2	L->R	Mac 8	GNAI2_ADCY7	gnai2a_adcy7
18	Neu 2	L->R	Mac 8	GNAI2_CXCR3	gnai2a_cxcr3.3
18	Neu 2	L->R	Mac 8	GNAI2_P2RY12	gnai2a_p2ry12
18	Neu 2	L->R	Mac 8	GNAS_ADCY7	gnas_adcy7
18	Neu 2	L->R	Mac 8	GPI_AMFR	gpia_amfra
18	Neu 2	L->R	Mac 8	GRN_TNFRSF1B	grn1_tnfrsf1b
18	Neu 2	L->R	Mac 8	GRN_TNFRSF1B	grn2_tnfrsf1b
18	Neu 2	L->R	Mac 8	HRAS_SDC2	hrasb_sdc2
18	Neu 2	L->R	Mac 8	HSP90AA1_LRP1	hsp90aa1.2_lrp1ab
18	Neu 2	L->R	Mac 8	HSP90B1_LRP1	hsp90b1_lrp1ab
18	Neu 2	L->R	Mac 8	HSPA8_ADRB2	hspa8_adrb2a
18	Neu 2	L->R	Mac 8	IGF2_IGF2R	igf2b_igf2r
18	Neu 2	L->R	Mac 8	IL15_IL2RB	il15l_csf2rb
18	Neu 2	L->R	Mac 8	IL15_IL2RB	il15l_il21r.1
18	Neu 2	L->R	Mac 8	IL16_CD4	il16_dicp3.3
18	Neu 2	L->R	Mac 8	IL16_CD4	il16_dicp2.1
18	Neu 2	L->R	Mac 8	IL1B_ADRB2	il1b_adrb2a
18	Neu 2	L->R	Mac 8	INHBA_SMAD3	inhbaa_smad3a
18	Neu 2	L->R	Mac 8	LTF_LRP1	tfa_lrp1ab
18	Neu 2	L->R	Mac 8	MMP9_LRP1	mmp9_lrp1ab
18	Neu 2	L->R	Mac 8	PROS1_MERTK	pros1_mertka
18	Neu 2	L->R	Mac 8	PSAP_LRP1	psap_lrp1ab
18	Neu 2	L->R	Mac 8	SERPINE2_LRP1	serpine2_lrp1ab
18	Neu 2	L->R	Mac 8	TGFB1_ACVRL1	tgfb1b_acvr1l
18	Neu 2	L->R	Mac 8	TGFB1_ITGAV	tgfb1b_itgav
18	Neu 2	L->R	Mac 8	TGFB1_ITGB1	tgfb1b_CABZ01058721.1
18	Neu 2	L->R	Mac 8	TGFB1_ITGB5	tgfb1b_itgb5
18	Neu 2	L->R	Mac 8	TGFB1_SDC2	tgfb1b_sdc2
18	Neu 2	L->R	Mac 8	TGFB1_SMAD3	tgfb1b_smad3a
18	Neu 2	L->R	Mac 8	TIMP2_ITGB1	timp2b_CABZ01058721.1
18	Neu 2	L->R	Mac 8	TLN1_ITGB5	tln1_itgb5
18	Neu 2	L->R	Mac 8	TNF_TNFRSF1B	tnfa_tnfrsf1b
18	Neu 2	L->R	Mac 8	TNF_TRADD	tnfa_tradd
18	Neu 2	L->R	Mac 8	TNF_TNFRSF1B	tnfb_tnfrsf1b
18	Neu 2	L->R	Mac 8	TNF_TRADD	tnfb_tradd
18	Neu 2	L->R	Mac 8	VEGFA_GPC1	vegfab_gpc1b
18	Neu 2	L->R	Mac 8	VEGFA_ITGAV	vegfab_itgav
18	Neu 2	L->R	Mac 8	VEGFA_ITGB1	vegfab_CABZ01058721.1
19	Neu 2	L->R	Mac 9	ADAM10_CD44	adam10a_cd44b
19	Neu 2	L->R	Mac 9	F13A1_ITGB1	f13a1a.1_itgb1b.1
19	Neu 2	L->R	Mac 9	F13A1_ITGB1	f13a1a.1_itgb1a
19	Neu 2	L->R	Mac 9	GNAI2_P2RY12	gnai2b_p2ry12
19	Neu 2	L->R	Mac 9	GNAI2_P2RY12	gnai2a_p2ry12
19	Neu 2	L->R	Mac 9	GNAS_CRHR1	gnas_crhr1
19	Neu 2	L->R	Mac 9	GPI_AMFR	gpia_amfra
19	Neu 2	L->R	Mac 9	GRN_TNFRSF1A	grn1_fas
19	Neu 2	L->R	Mac 9	GRN_TNFRSF1A	grn2_fas
19	Neu 2	L->R	Mac 9	HBEGF_CD44	hbegfa_cd44b
19	Neu 2	L->R	Mac 9	HBEGF_CD44	hbegfb_cd44b
19	Neu 2	L->R	Mac 9	IGF2_IGF2R	igf2b_igf2r
19	Neu 2	L->R	Mac 9	IGF2_INSR	igf2b_insra
19	Neu 2	L->R	Mac 9	IL15_IL2RB	il15l_il21r.1
19	Neu 2	L->R	Mac 9	IL16_CD4	il16_cd4-1
19	Neu 2	L->R	Mac 9	MIF_CD44	mif_cd44b
19	Neu 2	L->R	Mac 9	MMP1_CD44	mmp13a_cd44b
19	Neu 2	L->R	Mac 9	MMP9_CD44	mmp9_cd44b
19	Neu 2	L->R	Mac 9	PKM_CD44	pkma_cd44b
19	Neu 2	L->R	Mac 9	PSEN1_CD44	psen1_cd44b
19	Neu 2	L->R	Mac 9	TGFB1_TGFBR1	tgfb1b_tgfbr1b
19	Neu 2	L->R	Mac 9	TGFB1_TGFBR2	tgfb1b_tgfbr2a
19	Neu 2	L->R	Mac 9	TIMP2_CD44	timp2b_cd44b
19	Neu 2	L->R	Mac 9	TNF_TNFRSF1A	tnfa_fas
19	Neu 2	L->R	Mac 9	TNF_TNFRSF1A	tnfb_fas
19	Neu 2	L->R	Mac 9	UBA52_TGFBR1	uba52_tgfbr1b
19	Neu 2	L->R	Mac 9	UBA52_TGFBR2	uba52_tgfbr2a

## Sheet: CL7d-specific
7dpci_Neu-ligand to Mac-receptor
Cluster pair ID	CT2	pair type	CT1	human L-R pair	L-R pair
0	Neu 1	L->R	Mac 1	ADM_ADRB2	admb_adrb2a
0	Neu 1	L->R	Mac 1	ADM_GPR84	admb_gpr84
0	Neu 1	L->R	Mac 1	ADM_RAMP2	admb_ramp2
0	Neu 1	L->R	Mac 1	APP_AGER	appa_si:ch211-79k12.1
0	Neu 1	L->R	Mac 1	APP_APLP2	appa_aplp2
0	Neu 1	L->R	Mac 1	APP_CD74	appa_cd74a
0	Neu 1	L->R	Mac 1	APP_CD74	appa_cd74b
0	Neu 1	L->R	Mac 1	APP_GPC1	appa_gpc1b
0	Neu 1	L->R	Mac 1	APP_LRP1	appa_lrp1ab
0	Neu 1	L->R	Mac 1	APP_LRP10	appa_lrp10
0	Neu 1	L->R	Mac 1	APP_NGFR	appa_ngfrb
0	Neu 1	L->R	Mac 1	APP_NOTCH2	appa_notch2
0	Neu 1	L->R	Mac 1	APP_RPSA	appa_rpsa
0	Neu 1	L->R	Mac 1	FN1_C5AR1	fn1b_CABZ01041494.1
0	Neu 1	L->R	Mac 1	FN1_ITGA4	fn1b_itga4
0	Neu 1	L->R	Mac 1	FN1_ITGA5	fn1b_itga5
0	Neu 1	L->R	Mac 1	FN1_ITGAV	fn1b_itgav
0	Neu 1	L->R	Mac 1	FN1_ITGB1	fn1b_itgb1b
0	Neu 1	L->R	Mac 1	FN1_ITGB7	fn1b_itgb7
0	Neu 1	L->R	Mac 1	ICAM3_ITGB2	si:ch211-66e2.5_itgb2
0	Neu 1	L->R	Mac 1	IL16_CD4	il16_dicp2.2
0	Neu 1	L->R	Mac 1	SERPINE1_ITGAV	serpine1_itgav
0	Neu 1	L->R	Mac 1	SERPINE1_LRP1	serpine1_lrp1ab
1	Neu 1	L->R	Mac 2	ADAM10_TSPAN17	adam10a_tspan17
1	Neu 1	L->R	Mac 2	ADM_ADRB2	admb_adrb2a
1	Neu 1	L->R	Mac 2	ADM_GPR84	admb_gpr84
1	Neu 1	L->R	Mac 2	APP_AGER	appa_si:ch211-79k12.1
1	Neu 1	L->R	Mac 2	APP_APLP2	appa_aplp2
1	Neu 1	L->R	Mac 2	APP_CD74	appa_cd74a
1	Neu 1	L->R	Mac 2	APP_CD74	appa_cd74b
1	Neu 1	L->R	Mac 2	APP_GPC1	appa_gpc1b
1	Neu 1	L->R	Mac 2	APP_LRP1	appa_lrp1ab
1	Neu 1	L->R	Mac 2	APP_LRP10	appa_lrp10
1	Neu 1	L->R	Mac 2	APP_NOTCH2	appa_notch2
1	Neu 1	L->R	Mac 2	APP_RPSA	appa_rpsa
1	Neu 1	L->R	Mac 2	CALM2_INSR	calm3a_insra
1	Neu 1	L->R	Mac 2	CALM2_INSR	calm2a_insra
1	Neu 1	L->R	Mac 2	CALR_ITGAV	calr_itgav
1	Neu 1	L->R	Mac 2	CSF3_CSF3R	csf3b_csf3r
1	Neu 1	L->R	Mac 2	FN1_C5AR1	fn1b_CABZ01041494.1
1	Neu 1	L->R	Mac 2	FN1_ITGA4	fn1b_itga4
1	Neu 1	L->R	Mac 2	FN1_ITGA5	fn1b_itga5
1	Neu 1	L->R	Mac 2	FN1_ITGAV	fn1b_itgav
1	Neu 1	L->R	Mac 2	FN1_ITGB7	fn1b_itgb7
1	Neu 1	L->R	Mac 2	GNAS_CRHR1	gnas_crhr1
1	Neu 1	L->R	Mac 2	GRN_TNFRSF1B	grn1_tnfrsf1b
1	Neu 1	L->R	Mac 2	GRN_TNFRSF1B	grn2_tnfrsf1b
1	Neu 1	L->R	Mac 2	ICAM3_ITGB2	si:ch211-66e2.5_itgb2
1	Neu 1	L->R	Mac 2	IL16_CD4	il16_dicp3.3
1	Neu 1	L->R	Mac 2	IL16_CD4	il16_dicp2.2
1	Neu 1	L->R	Mac 2	IL1B_IL1R1	il1b_CABZ01054965.1
1	Neu 1	L->R	Mac 2	NAMPT_INSR	nampta_insra
1	Neu 1	L->R	Mac 2	SERPINE1_ITGAV	serpine1_itgav
1	Neu 1	L->R	Mac 2	SERPINE1_LRP1	serpine1_lrp1ab
1	Neu 1	L->R	Mac 2	TGFB1_ITGAV	tgfb1b_itgav
1	Neu 1	L->R	Mac 2	TNF_TNFRSF1B	tnfb_tnfrsf1b
1	Neu 1	L->R	Mac 2	VEGFA_ITGAV	vegfab_itgav
1	Neu 1	L->R	Mac 2	VEGFA_NRP1	vegfab_nrp1a
1	Neu 1	L->R	Mac 2	VEGFA_NRP2	vegfab_nrp2b
2	Neu 1	L->R	Mac 3	ADM_ADRB2	admb_adrb2a
2	Neu 1	L->R	Mac 3	ADM_GPR84	admb_gpr84
2	Neu 1	L->R	Mac 3	APP_AGER	appa_si:ch211-79k12.1
2	Neu 1	L->R	Mac 3	APP_APLP2	appa_aplp2
2	Neu 1	L->R	Mac 3	APP_CD74	appa_cd74a
2	Neu 1	L->R	Mac 3	APP_CD74	appa_cd74b
2	Neu 1	L->R	Mac 3	APP_GPC1	appa_gpc1b
2	Neu 1	L->R	Mac 3	APP_LRP1	appa_lrp1ab
2	Neu 1	L->R	Mac 3	APP_LRP10	appa_lrp10
2	Neu 1	L->R	Mac 3	APP_NGFR	appa_ngfrb
2	Neu 1	L->R	Mac 3	APP_NOTCH2	appa_notch2
2	Neu 1	L->R	Mac 3	APP_RPSA	appa_rpsa
2	Neu 1	L->R	Mac 3	APP_TNFRSF21	appa_tnfrsf21
2	Neu 1	L->R	Mac 3	FN1_C5AR1	fn1b_CABZ01041494.1
2	Neu 1	L->R	Mac 3	FN1_ITGA4	fn1b_itga4
2	Neu 1	L->R	Mac 3	FN1_ITGA5	fn1b_itga5
2	Neu 1	L->R	Mac 3	FN1_ITGAV	fn1b_itgav
2	Neu 1	L->R	Mac 3	FN1_ITGB1	fn1b_itgb1b
2	Neu 1	L->R	Mac 3	FN1_ITGB7	fn1b_itgb7
2	Neu 1	L->R	Mac 3	FN1_SDC2	fn1b_sdc2
2	Neu 1	L->R	Mac 3	GNAI2_S1PR4	gnai2b_s1pr4
2	Neu 1	L->R	Mac 3	GNAI2_S1PR4	gnai2a_s1pr4
2	Neu 1	L->R	Mac 3	ICAM3_ITGB2	si:ch211-66e2.5_itgb2
2	Neu 1	L->R	Mac 3	SERPINE1_ITGAV	serpine1_itgav
2	Neu 1	L->R	Mac 3	SERPINE1_ITGB5	serpine1_itgb5
2	Neu 1	L->R	Mac 3	SERPINE1_LRP1	serpine1_lrp1ab
3	Neu 1	L->R	Mac 4	ADM_ADRB2	admb_adrb2a
3	Neu 1	L->R	Mac 4	ADM_GPR84	admb_gpr84
3	Neu 1	L->R	Mac 4	APP_AGER	appa_si:ch211-79k12.1
3	Neu 1	L->R	Mac 4	APP_APLP2	appa_aplp2
3	Neu 1	L->R	Mac 4	APP_CD74	appa_cd74a
3	Neu 1	L->R	Mac 4	APP_CD74	appa_cd74b
3	Neu 1	L->R	Mac 4	APP_GPC1	appa_gpc1b
3	Neu 1	L->R	Mac 4	APP_LRP10	appa_lrp10
3	Neu 1	L->R	Mac 4	APP_NOTCH2	appa_notch2
3	Neu 1	L->R	Mac 4	APP_RPSA	appa_rpsa
3	Neu 1	L->R	Mac 4	BSG_SELE	bsg_selp
3	Neu 1	L->R	Mac 4	FN1_C5AR1	fn1b_CABZ01041494.1
3	Neu 1	L->R	Mac 4	FN1_ITGA4	fn1b_itga4
3	Neu 1	L->R	Mac 4	FN1_ITGA5	fn1b_itga5
3	Neu 1	L->R	Mac 4	FN1_ITGAV	fn1b_itgav
3	Neu 1	L->R	Mac 4	FN1_ITGB7	fn1b_itgb7
3	Neu 1	L->R	Mac 4	HBEGF_CD82	hbegfa_cd82b
3	Neu 1	L->R	Mac 4	HBEGF_CD82	hbegfb_cd82b
3	Neu 1	L->R	Mac 4	ICAM3_ITGB2	si:ch211-66e2.5_itgb2
3	Neu 1	L->R	Mac 4	SERPINE1_ITGAV	serpine1_itgav
4	Neu 1	L->R	Mac 5	ADM_GPR84	admb_gpr84
4	Neu 1	L->R	Mac 5	APP_AGER	appa_si:ch211-79k12.1
4	Neu 1	L->R	Mac 5	APP_APLP2	appa_aplp2
4	Neu 1	L->R	Mac 5	APP_CD74	appa_cd74a
4	Neu 1	L->R	Mac 5	APP_CD74	appa_cd74b
4	Neu 1	L->R	Mac 5	APP_GPC1	appa_gpc1b
4	Neu 1	L->R	Mac 5	APP_LRP10	appa_lrp10
4	Neu 1	L->R	Mac 5	APP_NOTCH2	appa_notch2
4	Neu 1	L->R	Mac 5	APP_RPSA	appa_rpsa
4	Neu 1	L->R	Mac 5	BSG_SELE	bsg_selp
4	Neu 1	L->R	Mac 5	FN1_C5AR1	fn1b_CABZ01041494.1
4	Neu 1	L->R	Mac 5	FN1_ITGA5	fn1b_itga5
4	Neu 1	L->R	Mac 5	GNAI2_S1PR4	gnai2b_s1pr4
4	Neu 1	L->R	Mac 5	GNAI2_S1PR4	gnai2a_s1pr4
4	Neu 1	L->R	Mac 5	HBEGF_CD82	hbegfa_cd82b
4	Neu 1	L->R	Mac 5	HBEGF_CD82	hbegfb_cd82b
4	Neu 1	L->R	Mac 5	HMGB1_CXCR4	hmgb1a_cxcr4a
4	Neu 1	L->R	Mac 5	ICAM3_ITGB2	si:ch211-66e2.5_itgb2
4	Neu 1	L->R	Mac 5	MIF_CXCR4	mif_cxcr4a
4	Neu 1	L->R	Mac 5	TGFB1_CXCR4	tgfb1b_cxcr4a
5	Neu 1	L->R	Mac 6	ADM_GPR84	admb_gpr84
5	Neu 1	L->R	Mac 6	APP_AGER	appa_si:ch211-79k12.1
5	Neu 1	L->R	Mac 6	APP_APLP2	appa_aplp2
5	Neu 1	L->R	Mac 6	APP_CD74	appa_cd74a
5	Neu 1	L->R	Mac 6	APP_CD74	appa_cd74b
5	Neu 1	L->R	Mac 6	APP_GPC1	appa_gpc1b
5	Neu 1	L->R	Mac 6	APP_LRP10	appa_lrp10
5	Neu 1	L->R	Mac 6	APP_NOTCH2	appa_si:ch73-281k2.5
5	Neu 1	L->R	Mac 6	APP_NOTCH2	appa_notch2
5	Neu 1	L->R	Mac 6	APP_PTGER2	appa_ptger2b
5	Neu 1	L->R	Mac 6	APP_RPSA	appa_rpsa
5	Neu 1	L->R	Mac 6	FN1_C5AR1	fn1b_CABZ01041494.1
5	Neu 1	L->R	Mac 6	FN1_ITGA4	fn1b_itga4
5	Neu 1	L->R	Mac 6	FN1_ITGA5	fn1b_itga5
5	Neu 1	L->R	Mac 6	FN1_ITGAV	fn1b_itgav
5	Neu 1	L->R	Mac 6	FN1_ITGB7	fn1b_itgb7
5	Neu 1	L->R	Mac 6	ICAM3_ITGB2	si:ch211-66e2.5_itgb2
5	Neu 1	L->R	Mac 6	SERPINE1_ITGAV	serpine1_itgav
6	Neu 1	L->R	Mac 7	ACTR2_ADRB2	actr2a_adrb2a
6	Neu 1	L->R	Mac 7	ADAM10_NOTCH2	adam10a_si:ch73-281k2.5
6	Neu 1	L->R	Mac 7	ADAM17_ITGA5	adam17a_itga5
6	Neu 1	L->R	Mac 7	ADM_ADRB2	adma_adrb2a
6	Neu 1	L->R	Mac 7	ADM_ADRB2	admb_adrb2a
6	Neu 1	L->R	Mac 7	ADM_GPR84	admb_gpr84
6	Neu 1	L->R	Mac 7	APP_AGER	appa_si:ch211-79k12.1
6	Neu 1	L->R	Mac 7	APP_APLP2	appa_aplp2
6	Neu 1	L->R	Mac 7	APP_CD74	appa_cd74a
6	Neu 1	L->R	Mac 7	APP_CD74	appa_cd74b
6	Neu 1	L->R	Mac 7	APP_GPC1	appa_gpc1b
6	Neu 1	L->R	Mac 7	APP_LRP10	appa_lrp10
6	Neu 1	L->R	Mac 7	APP_NGFR	appa_ngfrb
6	Neu 1	L->R	Mac 7	APP_NOTCH2	appa_si:ch73-281k2.5
6	Neu 1	L->R	Mac 7	APP_NOTCH2	appa_notch2
6	Neu 1	L->R	Mac 7	APP_RPSA	appa_rpsa
6	Neu 1	L->R	Mac 7	APP_SORL1	appa_sorl1
6	Neu 1	L->R	Mac 7	ARPC5_ADRB2	arpc5a_adrb2a
6	Neu 1	L->R	Mac 7	ARPC5_ADRB2	arpc5b_adrb2a
6	Neu 1	L->R	Mac 7	CALM2_KCNQ5	calm3a_kcnq5b
6	Neu 1	L->R	Mac 7	CALM2_KCNQ5	calm2a_kcnq5b
6	Neu 1	L->R	Mac 7	FN1_C5AR1	fn1b_CABZ01041494.1
6	Neu 1	L->R	Mac 7	FN1_ITGA4	fn1b_itga4
6	Neu 1	L->R	Mac 7	FN1_ITGA5	fn1b_itga5
6	Neu 1	L->R	Mac 7	FN1_ITGB1	fn1b_CABZ01058721.1
6	Neu 1	L->R	Mac 7	FN1_ITGB7	fn1b_itgb7
6	Neu 1	L->R	Mac 7	GNAI2_S1PR4	gnai2b_s1pr4
6	Neu 1	L->R	Mac 7	GNAI2_S1PR4	gnai2a_s1pr4
6	Neu 1	L->R	Mac 7	HSPA8_ADRB2	hspa8_adrb2a
6	Neu 1	L->R	Mac 7	ICAM3_ITGB2	si:ch211-66e2.5_itgb2
6	Neu 1	L->R	Mac 7	IL16_CD4	il16_dicp1.3-4
6	Neu 1	L->R	Mac 7	IL16_CD4	il16_si:ch73-322b17.4
6	Neu 1	L->R	Mac 7	IL1B_ADRB2	il1b_adrb2a
6	Neu 1	L->R	Mac 7	IL1B_IL1R1	il1b_CABZ01054965.1
6	Neu 1	L->R	Mac 7	MFNG_NOTCH2	mfng_si:ch73-281k2.5
6	Neu 1	L->R	Mac 7	PSEN1_NOTCH2	psen1_si:ch73-281k2.5
6	Neu 1	L->R	Mac 7	RLN3_ADRB2	rln3a_adrb2a
6	Neu 1	L->R	Mac 7	RTN4_NGFR	rtn4a_ngfrb
7	Neu 1	L->R	MN	ADM_RAMP2	adma_ramp2
7	Neu 1	L->R	MN	ADM_GPR84	admb_gpr84
7	Neu 1	L->R	MN	ADM_RAMP2	admb_ramp2
7	Neu 1	L->R	MN	APOE_LRP1	apoeb_lrp1ab
7	Neu 1	L->R	MN	APP_AGER	appa_si:ch211-79k12.1
7	Neu 1	L->R	MN	APP_APLP2	appa_aplp2
7	Neu 1	L->R	MN	APP_CD74	appa_cd74a
7	Neu 1	L->R	MN	APP_CD74	appa_cd74b
7	Neu 1	L->R	MN	APP_GPC1	appa_gpc1b
7	Neu 1	L->R	MN	APP_LRP1	appa_lrp1ab
7	Neu 1	L->R	MN	APP_LRP10	appa_lrp10
7	Neu 1	L->R	MN	APP_NOTCH2	appa_notch2
7	Neu 1	L->R	MN	APP_RPSA	appa_rpsa
7	Neu 1	L->R	MN	CALM2_INSR	calm3a_insra
7	Neu 1	L->R	MN	CALM2_KCNQ5	calm3a_kcnq5b
7	Neu 1	L->R	MN	CALM2_INSR	calm2a_insra
7	Neu 1	L->R	MN	CALM2_KCNQ5	calm2a_kcnq5b
7	Neu 1	L->R	MN	CALR_LRP1	calr_lrp1ab
7	Neu 1	L->R	MN	FN1_C5AR1	fn1b_CABZ01041494.1
7	Neu 1	L->R	MN	FN1_ITGA4	fn1b_itga4
7	Neu 1	L->R	MN	FN1_ITGA5	fn1b_itga5
7	Neu 1	L->R	MN	FN1_ITGAV	fn1b_itgav
7	Neu 1	L->R	MN	FN1_ITGB7	fn1b_itgb7
7	Neu 1	L->R	MN	GNAI2_S1PR4	gnai2b_s1pr4
7	Neu 1	L->R	MN	GNAI2_S1PR4	gnai2a_s1pr4
7	Neu 1	L->R	MN	HBEGF_CD82	hbegfa_cd82b
7	Neu 1	L->R	MN	HBEGF_CD82	hbegfb_cd82b
7	Neu 1	L->R	MN	HMGB1_CXCR4	hmgb1a_cxcr4a
7	Neu 1	L->R	MN	HSP90AA1_LRP1	hsp90aa1.2_lrp1ab
7	Neu 1	L->R	MN	HSP90B1_LRP1	hsp90b1_lrp1ab
7	Neu 1	L->R	MN	ICAM3_ITGB2	si:ch211-66e2.5_itgb2
7	Neu 1	L->R	MN	IL1B_IL1R1	il1b_CABZ01054965.1
7	Neu 1	L->R	MN	LTF_LRP1	tfa_lrp1ab
7	Neu 1	L->R	MN	MIF_CXCR4	mif_cxcr4a
7	Neu 1	L->R	MN	MMP9_LRP1	mmp9_lrp1ab
7	Neu 1	L->R	MN	NAMPT_INSR	nampta_insra
7	Neu 1	L->R	MN	PSAP_LRP1	psap_lrp1ab
7	Neu 1	L->R	MN	RLN3_RAMP2	rln3a_ramp2
7	Neu 1	L->R	MN	SERPINE1_ITGAV	serpine1_itgav
7	Neu 1	L->R	MN	SERPINE1_LRP1	serpine1_lrp1ab
7	Neu 1	L->R	MN	SERPINE2_LRP1	serpine2_lrp1ab
7	Neu 1	L->R	MN	TGFB1_CXCR4	tgfb1b_cxcr4a
8	Neu 1	L->R	Mac 8	ADAM10_NOTCH1	adam10a_notch1a
8	Neu 1	L->R	Mac 8	ADAM10_NOTCH2	adam10a_si:ch73-281k2.5
8	Neu 1	L->R	Mac 8	ADAM10_TSPAN17	adam10a_tspan17
8	Neu 1	L->R	Mac 8	ADAM17_NOTCH1	adam17a_notch1a
8	Neu 1	L->R	Mac 8	ADM_GPR84	admb_gpr84
8	Neu 1	L->R	Mac 8	APP_AGER	appa_si:ch211-79k12.1
8	Neu 1	L->R	Mac 8	APP_CD74	appa_cd74a
8	Neu 1	L->R	Mac 8	APP_CD74	appa_cd74b
8	Neu 1	L->R	Mac 8	APP_LRP10	appa_lrp10
8	Neu 1	L->R	Mac 8	APP_NGFR	appa_ngfra
8	Neu 1	L->R	Mac 8	APP_NOTCH2	appa_si:ch73-281k2.5
8	Neu 1	L->R	Mac 8	APP_NOTCH2	appa_notch2
8	Neu 1	L->R	Mac 8	APP_RPSA	appa_rpsa
8	Neu 1	L->R	Mac 8	BSG_SELE	bsg_selp
8	Neu 1	L->R	Mac 8	FN1_C5AR1	fn1b_CABZ01041494.1
8	Neu 1	L->R	Mac 8	GNAI2_EDNRA	gnai2b_ednraa
8	Neu 1	L->R	Mac 8	GNAI2_EDNRA	gnai2a_ednraa
8	Neu 1	L->R	Mac 8	ICAM3_ITGB2	si:ch211-66e2.5_itgb2
8	Neu 1	L->R	Mac 8	IL16_CD4	il16_cd4-1
8	Neu 1	L->R	Mac 8	IL16_CD4	il16_si:ch73-322b17.4
8	Neu 1	L->R	Mac 8	MFNG_NOTCH1	mfng_notch1a
8	Neu 1	L->R	Mac 8	MFNG_NOTCH2	mfng_si:ch73-281k2.5
8	Neu 1	L->R	Mac 8	PSEN1_NOTCH1	psen1_notch1a
8	Neu 1	L->R	Mac 8	PSEN1_NOTCH2	psen1_si:ch73-281k2.5				AS
8	Neu 1	L->R	Mac 8	RTN4_NGFR	rtn4a_ngfra
8	Neu 1	L->R	Mac 8	RTN4_TNFRSF19	rtn4a_tnfrsf19
8	Neu 1	L->R	Mac 8	TNF_NOTCH1	tnfb_notch1a
8	Neu 1	L->R	Mac 8	UBA52_NOTCH1	uba52_notch1a
9	Neu 1	L->R	Mac 9	ADAM10_IL6R	adam10a_il6r
9	Neu 1	L->R	Mac 9	ADAM17_IL6R	adam17a_il6r
9	Neu 1	L->R	Mac 9	ADM_ADRB2	admb_adrb2a
9	Neu 1	L->R	Mac 9	ADM_ADRB3	admb_adrb3b
9	Neu 1	L->R	Mac 9	ADM_RAMP2	admb_ramp2
9	Neu 1	L->R	Mac 9	APOE_LRP5	apoeb_lrp5
9	Neu 1	L->R	Mac 9	APP_AGER	appa_si:ch211-79k12.1
9	Neu 1	L->R	Mac 9	APP_APLP2	appa_aplp2
9	Neu 1	L->R	Mac 9	APP_CD74	appa_cd74a
9	Neu 1	L->R	Mac 9	APP_CD74	appa_cd74b
9	Neu 1	L->R	Mac 9	APP_LRP10	appa_lrp10
9	Neu 1	L->R	Mac 9	APP_NGFR	appa_ngfrb
9	Neu 1	L->R	Mac 9	APP_NOTCH2	appa_notch2
9	Neu 1	L->R	Mac 9	APP_RPSA	appa_rpsa
9	Neu 1	L->R	Mac 9	APP_TNFRSF21	appa_tnfrsf21
9	Neu 1	L->R	Mac 9	CNTF_IL6R	m17_il6r
9	Neu 1	L->R	Mac 9	CXCL9_CXCR3	BX323596.2_cxcr3.3
9	Neu 1	L->R	Mac 9	FAM3C_LAMP1	fam3c_lamp1b
9	Neu 1	L->R	Mac 9	FN1_ITGAV	fn1b_itgav
9	Neu 1	L->R	Mac 9	FN1_ITGB1	fn1b_itgb1b.1
9	Neu 1	L->R	Mac 9	FN1_ITGB1	fn1b_itgb1a
9	Neu 1	L->R	Mac 9	FN1_ITGB7	fn1b_itgb7
9	Neu 1	L->R	Mac 9	FN1_SDC2	fn1b_sdc2
9	Neu 1	L->R	Mac 9	GNAI2_CXCR3	gnai2b_cxcr3.3
9	Neu 1	L->R	Mac 9	GNAI2_CXCR3	gnai2a_cxcr3.3
9	Neu 1	L->R	Mac 9	ICAM3_ITGB2	si:ch211-66e2.5_itgb2
9	Neu 1	L->R	Mac 9	INHBA_ACVR1B	inhbaa_acvr1bb
9	Neu 1	L->R	Mac 9	PDAP1_PDGFRB	pdap1b_pdgfrb
9	Neu 1	L->R	Mac 9	PROS1_TYRO3	pros1_tyro3
9	Neu 1	L->R	Mac 9	SERPINE1_ITGAV	serpine1_itgav
9	Neu 1	L->R	Mac 9	TNF_TNFRSF21	tnfb_tnfrsf21
9	Neu 1	L->R	Mac 9	VEGFA_TYRO3	vegfab_tyro3
10	Neu 2	L->R	Mac 1	IL16_CD4	il16_dicp2.2
10	Neu 2	L->R	Mac 1	LIN7C_ABCA1	lin7c_abca1a
10	Neu 2	L->R	Mac 1	LIN7C_ABCA1	lin7c_abca1b
10	Neu 2	L->R	Mac 1	PDGFB_ITGAV	pdgfba_itgav
10	Neu 2	L->R	Mac 1	PDGFB_LRP1	pdgfba_lrp1ab
10	Neu 2	L->R	Mac 1	RLN3_ADRB2	rln3a_adrb2a
10	Neu 2	L->R	Mac 1	RLN3_GPR84	rln3a_gpr84
10	Neu 2	L->R	Mac 1	RLN3_RAMP2	rln3a_ramp2
10	Neu 2	L->R	Mac 1	SERPINE1_ITGAV	serpine1_itgav
10	Neu 2	L->R	Mac 1	SERPINE1_LRP1	serpine1_lrp1ab
11	Neu 2	L->R	Mac 2	ADAM10_TSPAN17	adam10a_tspan17
11	Neu 2	L->R	Mac 2	CALM2_INSR	calm3a_insra
11	Neu 2	L->R	Mac 2	CALM2_INSR	calm2a_insra
11	Neu 2	L->R	Mac 2	CSF3_CSF3R	csf3a_csf3r
11	Neu 2	L->R	Mac 2	CSF3_CSF3R	csf3b_csf3r
11	Neu 2	L->R	Mac 2	GNAS_CRHR1	gnas_crhr1
11	Neu 2	L->R	Mac 2	GRN_TNFRSF1B	grn1_tnfrsf1b
11	Neu 2	L->R	Mac 2	GRN_TNFRSF1B	grn2_tnfrsf1b
11	Neu 2	L->R	Mac 2	HRAS_INSR	hrasb_insra
11	Neu 2	L->R	Mac 2	IL16_CD4	il16_dicp3.3
11	Neu 2	L->R	Mac 2	IL16_CD4	il16_dicp2.2
11	Neu 2	L->R	Mac 2	IL1B_IL1R1	il1b_CABZ01054965.1
11	Neu 2	L->R	Mac 2	LIN7C_ABCA1	lin7c_abca1a
11	Neu 2	L->R	Mac 2	LIN7C_ABCA1	lin7c_abca1b
11	Neu 2	L->R	Mac 2	NAMPT_INSR	nampta_insra
11	Neu 2	L->R	Mac 2	PDGFB_ITGAV	pdgfba_itgav
11	Neu 2	L->R	Mac 2	PDGFB_LRP1	pdgfba_lrp1ab
11	Neu 2	L->R	Mac 2	RLN3_ADRB2	rln3a_adrb2a
11	Neu 2	L->R	Mac 2	RLN3_GPR84	rln3a_gpr84
11	Neu 2	L->R	Mac 2	SERPINE1_ITGAV	serpine1_itgav
11	Neu 2	L->R	Mac 2	SERPINE1_LRP1	serpine1_lrp1ab
11	Neu 2	L->R	Mac 2	TGFB1_ITGAV	tgfb1b_itgav
11	Neu 2	L->R	Mac 2	TNF_TNFRSF1B	tnfa_tnfrsf1b
11	Neu 2	L->R	Mac 2	TNF_TNFRSF1B	tnfb_tnfrsf1b
11	Neu 2	L->R	Mac 2	VEGFA_ITGAV	vegfab_itgav
11	Neu 2	L->R	Mac 2	VEGFA_NRP1	vegfab_nrp1a
11	Neu 2	L->R	Mac 2	VEGFA_NRP2	vegfab_nrp2b
12	Neu 2	L->R	Mac 3	GNAI2_S1PR4	gnai2b_s1pr4
12	Neu 2	L->R	Mac 3	GNAI2_S1PR4	gnai2a_s1pr4
12	Neu 2	L->R	Mac 3	LIN7C_ABCA1	lin7c_abca1a
12	Neu 2	L->R	Mac 3	LIN7C_ABCA1	lin7c_abca1b
12	Neu 2	L->R	Mac 3	PDGFB_ITGAV	pdgfba_itgav
12	Neu 2	L->R	Mac 3	PDGFB_LRP1	pdgfba_lrp1ab
12	Neu 2	L->R	Mac 3	RLN3_ADRB2	rln3a_adrb2a
12	Neu 2	L->R	Mac 3	RLN3_GPR84	rln3a_gpr84
12	Neu 2	L->R	Mac 3	SERPINE1_ITGAV	serpine1_itgav
12	Neu 2	L->R	Mac 3	SERPINE1_ITGB5	serpine1_itgb5
12	Neu 2	L->R	Mac 3	SERPINE1_LRP1	serpine1_lrp1ab
13	Neu 2	L->R	Mac 4	BSG_SELE	bsg_selp
13	Neu 2	L->R	Mac 4	HBEGF_CD82	hbegfa_cd82b
13	Neu 2	L->R	Mac 4	HBEGF_CD82	hbegfb_cd82b
13	Neu 2	L->R	Mac 4	LIN7C_ABCA1	lin7c_abca1a
13	Neu 2	L->R	Mac 4	LIN7C_ABCA1	lin7c_abca1b
13	Neu 2	L->R	Mac 4	PDGFB_ITGAV	pdgfba_itgav
13	Neu 2	L->R	Mac 4	RLN3_ADRB2	rln3a_adrb2a
13	Neu 2	L->R	Mac 4	RLN3_GPR84	rln3a_gpr84
13	Neu 2	L->R	Mac 4	SERPINE1_ITGAV	serpine1_itgav
14	Neu 2	L->R	Mac 5	BSG_SELE	bsg_selp
14	Neu 2	L->R	Mac 5	GNAI2_S1PR4	gnai2b_s1pr4
14	Neu 2	L->R	Mac 5	GNAI2_S1PR4	gnai2a_s1pr4
14	Neu 2	L->R	Mac 5	HBEGF_CD82	hbegfa_cd82b
14	Neu 2	L->R	Mac 5	HBEGF_CD82	hbegfb_cd82b
14	Neu 2	L->R	Mac 5	HMGB1_CXCR4	hmgb1a_cxcr4a
14	Neu 2	L->R	Mac 5	LIN7C_ABCA1	lin7c_abca1a
14	Neu 2	L->R	Mac 5	LIN7C_ABCA1	lin7c_abca1b
14	Neu 2	L->R	Mac 5	MIF_CXCR4	mif_cxcr4a
14	Neu 2	L->R	Mac 5	RLN3_GPR84	rln3a_gpr84
14	Neu 2	L->R	Mac 5	TGFB1_CXCR4	tgfb1b_cxcr4a
15	Neu 2	L->R	Mac 6	LIN7C_ABCA1	lin7c_abca1a
15	Neu 2	L->R	Mac 6	LIN7C_ABCA1	lin7c_abca1b
15	Neu 2	L->R	Mac 6	PDGFB_ITGAV	pdgfba_itgav
15	Neu 2	L->R	Mac 6	RLN3_GPR84	rln3a_gpr84
15	Neu 2	L->R	Mac 6	SERPINE1_ITGAV	serpine1_itgav
16	Neu 2	L->R	Mac 7	ACTR2_ADRB2	actr2a_adrb2a
16	Neu 2	L->R	Mac 7	ACTR2_ADRB2	actr2b_adrb2a
16	Neu 2	L->R	Mac 7	ADAM10_NOTCH2	adam10a_si:ch73-281k2.5
16	Neu 2	L->R	Mac 7	ADAM17_ITGA5	adam17a_itga5
16	Neu 2	L->R	Mac 7	ADM_ADRB2	adma_adrb2a
16	Neu 2	L->R	Mac 7	ARPC5_ADRB2	arpc5a_adrb2a
16	Neu 2	L->R	Mac 7	ARPC5_ADRB2	arpc5b_adrb2a
16	Neu 2	L->R	Mac 7	CALM2_KCNQ5	calm3a_kcnq5b
16	Neu 2	L->R	Mac 7	CALM2_KCNQ5	calm2a_kcnq5b
16	Neu 2	L->R	Mac 7	GNAI2_S1PR4	gnai2b_s1pr4
16	Neu 2	L->R	Mac 7	GNAI2_S1PR4	gnai2a_s1pr4
16	Neu 2	L->R	Mac 7	HSPA8_ADRB2	hspa8_adrb2a
16	Neu 2	L->R	Mac 7	IL16_CD4	il16_dicp1.3-4
16	Neu 2	L->R	Mac 7	IL16_CD4	il16_si:ch73-322b17.4
16	Neu 2	L->R	Mac 7	IL1B_ADRB2	il1b_adrb2a
16	Neu 2	L->R	Mac 7	IL1B_IL1R1	il1b_CABZ01054965.1
16	Neu 2	L->R	Mac 7	LIN7C_ABCA1	lin7c_abca1a
16	Neu 2	L->R	Mac 7	LIN7C_ABCA1	lin7c_abca1b
16	Neu 2	L->R	Mac 7	MFNG_NOTCH2	mfng_si:ch73-281k2.5
16	Neu 2	L->R	Mac 7	PSEN1_NOTCH2	psen1_si:ch73-281k2.5
16	Neu 2	L->R	Mac 7	RLN3_ADRB2	rln3a_adrb2a
16	Neu 2	L->R	Mac 7	RLN3_GPR84	rln3a_gpr84
16	Neu 2	L->R	Mac 7	RTN4_NGFR	rtn4a_ngfrb
17	Neu 2	L->R	MN	ADM_RAMP2	adma_ramp2
17	Neu 2	L->R	MN	CALM2_INSR	calm3a_insra
17	Neu 2	L->R	MN	CALM2_KCNQ5	calm3a_kcnq5b
17	Neu 2	L->R	MN	CALM2_INSR	calm2a_insra
17	Neu 2	L->R	MN	CALM2_KCNQ5	calm2a_kcnq5b
17	Neu 2	L->R	MN	GNAI2_S1PR4	gnai2b_s1pr4
17	Neu 2	L->R	MN	GNAI2_S1PR4	gnai2a_s1pr4
17	Neu 2	L->R	MN	HBEGF_CD82	hbegfa_cd82b
17	Neu 2	L->R	MN	HBEGF_CD82	hbegfb_cd82b
17	Neu 2	L->R	MN	HMGB1_CXCR4	hmgb1a_cxcr4a
17	Neu 2	L->R	MN	HRAS_INSR	hrasb_insra
17	Neu 2	L->R	MN	HSP90AA1_LRP1	hsp90aa1.2_lrp1ab
17	Neu 2	L->R	MN	HSP90B1_LRP1	hsp90b1_lrp1ab
17	Neu 2	L->R	MN	IL1B_IL1R1	il1b_CABZ01054965.1
17	Neu 2	L->R	MN	LIN7C_ABCA1	lin7c_abca1a
17	Neu 2	L->R	MN	LIN7C_ABCA1	lin7c_abca1b
17	Neu 2	L->R	MN	LTF_LRP1	tfa_lrp1ab
17	Neu 2	L->R	MN	MIF_CXCR4	mif_cxcr4a
17	Neu 2	L->R	MN	MMP9_LRP1	mmp9_lrp1ab
17	Neu 2	L->R	MN	NAMPT_INSR	nampta_insra
17	Neu 2	L->R	MN	PDGFB_ITGAV	pdgfba_itgav
17	Neu 2	L->R	MN	PDGFB_LRP1	pdgfba_lrp1ab
17	Neu 2	L->R	MN	PSAP_LRP1	psap_lrp1ab
17	Neu 2	L->R	MN	RLN3_GPR84	rln3a_gpr84
17	Neu 2	L->R	MN	RLN3_RAMP2	rln3a_ramp2
17	Neu 2	L->R	MN	SERPINE1_ITGAV	serpine1_itgav
17	Neu 2	L->R	MN	SERPINE1_LRP1	serpine1_lrp1ab
17	Neu 2	L->R	MN	SERPINE2_LRP1	serpine2_lrp1ab
17	Neu 2	L->R	MN	TGFB1_CXCR4	tgfb1b_cxcr4a
18	Neu 2	L->R	Mac 8	ADAM10_NOTCH1	adam10a_notch1a
18	Neu 2	L->R	Mac 8	ADAM10_NOTCH2	adam10a_si:ch73-281k2.5
18	Neu 2	L->R	Mac 8	ADAM10_TSPAN17	adam10a_tspan17
18	Neu 2	L->R	Mac 8	ADAM17_NOTCH1	adam17a_notch1a
18	Neu 2	L->R	Mac 8	BSG_SELE	bsg_selp
18	Neu 2	L->R	Mac 8	GNAI2_EDNRA	gnai2b_ednraa
18	Neu 2	L->R	Mac 8	GNAI2_EDNRA	gnai2a_ednraa
18	Neu 2	L->R	Mac 8	IL16_CD4	il16_cd4-1
18	Neu 2	L->R	Mac 8	IL16_CD4	il16_si:ch73-322b17.4
18	Neu 2	L->R	Mac 8	LIN7C_ABCA1	lin7c_abca1a
18	Neu 2	L->R	Mac 8	LIN7C_ABCA1	lin7c_abca1b
18	Neu 2	L->R	Mac 8	MFNG_NOTCH1	mfng_notch1a
18	Neu 2	L->R	Mac 8	MFNG_NOTCH2	mfng_si:ch73-281k2.5
18	Neu 2	L->R	Mac 8	PDGFB_ART1	pdgfba_si:ch211-145b13.6
18	Neu 2	L->R	Mac 8	PSEN1_NOTCH1	psen1_notch1a
18	Neu 2	L->R	Mac 8	PSEN1_NOTCH2	psen1_si:ch73-281k2.5
18	Neu 2	L->R	Mac 8	RLN3_GPR84	rln3a_gpr84
18	Neu 2	L->R	Mac 8	RTN4_NGFR	rtn4a_ngfra
18	Neu 2	L->R	Mac 8	RTN4_TNFRSF19	rtn4a_tnfrsf19
18	Neu 2	L->R	Mac 8	TNF_NOTCH1	tnfa_notch1a
18	Neu 2	L->R	Mac 8	TNF_NOTCH1	tnfb_notch1a
18	Neu 2	L->R	Mac 8	UBA52_NOTCH1	uba52_notch1a
19	Neu 2	L->R	Mac 9	ADAM10_IL6R	adam10a_il6r
19	Neu 2	L->R	Mac 9	ADAM17_IL6R	adam17a_il6r
19	Neu 2	L->R	Mac 9	CNTF_IL6R	m17_il6r
19	Neu 2	L->R	Mac 9	CXCL9_CXCR3	BX323596.1_cxcr3.3
19	Neu 2	L->R	Mac 9	CXCL9_CXCR3	BX323596.2_cxcr3.3
19	Neu 2	L->R	Mac 9	FAM3C_LAMP1	fam3c_lamp1b
19	Neu 2	L->R	Mac 9	GNAI2_CXCR3	gnai2b_cxcr3.3
19	Neu 2	L->R	Mac 9	GNAI2_CXCR3	gnai2a_cxcr3.3
19	Neu 2	L->R	Mac 9	INHBA_ACVR1B	inhbaa_acvr1bb
19	Neu 2	L->R	Mac 9	LIN7C_ABCA1	lin7c_abca1a
19	Neu 2	L->R	Mac 9	LIN7C_ABCA1	lin7c_abca1b
19	Neu 2	L->R	Mac 9	PDAP1_PDGFRB	pdap1b_pdgfrb
19	Neu 2	L->R	Mac 9	PDGFA_PDGFRB	pdgfab_pdgfrb
19	Neu 2	L->R	Mac 9	PDGFB_ITGAV	pdgfba_itgav
19	Neu 2	L->R	Mac 9	PDGFB_PDGFRB	pdgfba_pdgfrb
19	Neu 2	L->R	Mac 9	PROS1_TYRO3	pros1_tyro3
19	Neu 2	L->R	Mac 9	RLN3_ADRB2	rln3a_adrb2a
19	Neu 2	L->R	Mac 9	RLN3_ADRB3	rln3a_adrb3b
19	Neu 2	L->R	Mac 9	RLN3_RAMP2	rln3a_ramp2
19	Neu 2	L->R	Mac 9	SERPINE1_ITGAV	serpine1_itgav
19	Neu 2	L->R	Mac 9	TNF_TNFRSF21	tnfa_tnfrsf21
19	Neu 2	L->R	Mac 9	TNF_TNFRSF21	tnfb_tnfrsf21
19	Neu 2	L->R	Mac 9	VEGFA_TYRO3	vegfab_tyro3

## Sheet: 7d common
7dpci_Neu-ligand to Mac-receptor
Cluster pair ID	CT2	pair type	CT1	human L-R pair	L-R pair
0	Neu 1	L->R	Mac 1	ACTR2_ADRB2	actr2a_adrb2a
0	Neu 1	L->R	Mac 1	ADAM10_GPNMB	adam10a_gpnmb
0	Neu 1	L->R	Mac 1	ADAM10_IL6R	adam10a_il6r
0	Neu 1	L->R	Mac 1	ADAM10_NOTCH1	adam10a_notch1a
0	Neu 1	L->R	Mac 1	ADAM10_NOTCH2	adam10a_notch2
0	Neu 1	L->R	Mac 1	ADAM10_TSPAN14	adam10a_tspan14
0	Neu 1	L->R	Mac 1	ADAM17_IL6R	adam17a_il6r
0	Neu 1	L->R	Mac 1	ADAM17_ITGA5	adam17a_itga5
0	Neu 1	L->R	Mac 1	ADAM17_ITGB1	adam17a_itgb1b
0	Neu 1	L->R	Mac 1	ADAM17_NOTCH1	adam17a_notch1a
0	Neu 1	L->R	Mac 1	ADAM28_ITGA4	adam28_itga4
0	Neu 1	L->R	Mac 1	ADM_ADRB2	adma_adrb2a
0	Neu 1	L->R	Mac 1	ADM_GPR84	adma_gpr84
0	Neu 1	L->R	Mac 1	ADM_RAMP2	adma_ramp2
0	Neu 1	L->R	Mac 1	AGTRAP_RACK1	agtrap_rack1
0	Neu 1	L->R	Mac 1	APOE_ABCA1	apoeb_abca1a
0	Neu 1	L->R	Mac 1	APOE_ABCA1	apoeb_abca1b
0	Neu 1	L->R	Mac 1	APOE_LRP1	apoeb_lrp1ab
0	Neu 1	L->R	Mac 1	APOE_SCARB1	apoeb_scarb1
0	Neu 1	L->R	Mac 1	ARF6_SMAP1	arf6a_smap1
0	Neu 1	L->R	Mac 1	ARF6_SMAP1	arf6b_smap1
0	Neu 1	L->R	Mac 1	ARPC5_ADRB2	arpc5a_adrb2a
0	Neu 1	L->R	Mac 1	ARPC5_ADRB2	arpc5b_adrb2a
0	Neu 1	L->R	Mac 1	CALM2_ABCA1	calm3a_abca1a
0	Neu 1	L->R	Mac 1	CALM2_ABCA1	calm3a_abca1b
0	Neu 1	L->R	Mac 1	CALM2_INSR	calm3a_insra
0	Neu 1	L->R	Mac 1	CALM2_ABCA1	calm2a_abca1a
0	Neu 1	L->R	Mac 1	CALM2_ABCA1	calm2a_abca1b
0	Neu 1	L->R	Mac 1	CALM2_INSR	calm2a_insra
0	Neu 1	L->R	Mac 1	CALR_ITGAV	calr_itgav
0	Neu 1	L->R	Mac 1	CALR_LRP1	calr_lrp1ab
0	Neu 1	L->R	Mac 1	CALR_SCARF1	calr_scarf1
0	Neu 1	L->R	Mac 1	CD99_CD81	cd99_cd81a
0	Neu 1	L->R	Mac 1	CNTF_IL6R	m17_il6r
0	Neu 1	L->R	Mac 1	CSF3_CSF1R	csf3b_csf1ra
0	Neu 1	L->R	Mac 1	CSF3_CSF3R	csf3b_csf3r
0	Neu 1	L->R	Mac 1	CXCL9_CXCR3	BX323596.2_cxcr3.3
0	Neu 1	L->R	Mac 1	F13A1_ITGA4	f13a1b_itga4
0	Neu 1	L->R	Mac 1	F13A1_ITGB1	f13a1b_itgb1b
0	Neu 1	L->R	Mac 1	FAM3C_LAMP1	fam3c_lamp1a
0	Neu 1	L->R	Mac 1	GNAI2_ADCY7	gnai2b_adcy7
0	Neu 1	L->R	Mac 1	GNAI2_C5AR1	gnai2b_CABZ01041494.1
0	Neu 1	L->R	Mac 1	GNAI2_CXCR3	gnai2b_cxcr3.3
0	Neu 1	L->R	Mac 1	GNAI2_P2RY12	gnai2b_p2ry12
0	Neu 1	L->R	Mac 1	GNAI2_ADCY7	gnai2a_adcy7
0	Neu 1	L->R	Mac 1	GNAI2_C5AR1	gnai2a_CABZ01041494.1
0	Neu 1	L->R	Mac 1	GNAI2_CXCR3	gnai2a_cxcr3.3
0	Neu 1	L->R	Mac 1	GNAI2_P2RY12	gnai2a_p2ry12
0	Neu 1	L->R	Mac 1	GNAS_ADCY7	gnas_adcy7
0	Neu 1	L->R	Mac 1	GPI_AMFR	gpia_amfra
0	Neu 1	L->R	Mac 1	GRN_SORT1	grn1_sort1b
0	Neu 1	L->R	Mac 1	GRN_TNFRSF1B	grn1_tnfrsf1b
0	Neu 1	L->R	Mac 1	GRN_SORT1	grn2_sort1b
0	Neu 1	L->R	Mac 1	GRN_TNFRSF1B	grn2_tnfrsf1b
0	Neu 1	L->R	Mac 1	HBEGF_CD82	hbegfa_cd82a
0	Neu 1	L->R	Mac 1	HBEGF_CD82	hbegfb_cd82a
0	Neu 1	L->R	Mac 1	HMGB1_AGER	hmgb1a_si:ch211-79k12.1
0	Neu 1	L->R	Mac 1	HMGB1_CXCR4	hmgb1a_cxcr4a
0	Neu 1	L->R	Mac 1	HMGB1_CXCR4	hmgb1a_cxcr4b
0	Neu 1	L->R	Mac 1	HSP90AA1_LRP1	hsp90aa1.2_lrp1ab
0	Neu 1	L->R	Mac 1	HSP90B1_LRP1	hsp90b1_lrp1ab
0	Neu 1	L->R	Mac 1	HSPA8_ADRB2	hspa8_adrb2a
0	Neu 1	L->R	Mac 1	ICAM3_ITGB2	si:ch211-66e2.3_itgb2
0	Neu 1	L->R	Mac 1	ICAM3_ITGB2	si:ch73-208g10.1_itgb2
0	Neu 1	L->R	Mac 1	ICAM3_ITGB2	icam3_itgb2
0	Neu 1	L->R	Mac 1	IL16_CD4	il16_dicp3.3
0	Neu 1	L->R	Mac 1	IL16_CD4	il16_dicp3.1
0	Neu 1	L->R	Mac 1	IL16_CD4	il16_dicp2.1
0	Neu 1	L->R	Mac 1	IL1B_ADRB2	il1b_adrb2a
0	Neu 1	L->R	Mac 1	IL1B_IL1R1	il1b_CABZ01054965.1
0	Neu 1	L->R	Mac 1	INHBA_BAMBI	inhbaa_bambia
0	Neu 1	L->R	Mac 1	INHBA_SMAD3	inhbaa_smad3a
0	Neu 1	L->R	Mac 1	LTF_LRP1	tfa_lrp1ab
0	Neu 1	L->R	Mac 1	MFNG_NOTCH1	mfng_notch1a
0	Neu 1	L->R	Mac 1	MFNG_NOTCH2	mfng_notch2
0	Neu 1	L->R	Mac 1	MIF_CD74	mif_cd74a
0	Neu 1	L->R	Mac 1	MIF_CD74	mif_cd74b
0	Neu 1	L->R	Mac 1	MIF_CXCR4	mif_cxcr4a
0	Neu 1	L->R	Mac 1	MIF_CXCR4	mif_cxcr4b
0	Neu 1	L->R	Mac 1	MMP9_ITGB2	mmp9_itgb2
0	Neu 1	L->R	Mac 1	MMP9_LRP1	mmp9_lrp1ab
0	Neu 1	L->R	Mac 1	NAMPT_INSR	nampta_insra
0	Neu 1	L->R	Mac 1	NUCB2_ERAP1	nucb2a_erap1b
0	Neu 1	L->R	Mac 1	PROS1_MERTK	pros1_mertka
0	Neu 1	L->R	Mac 1	PSAP_LRP1	psap_lrp1ab
0	Neu 1	L->R	Mac 1	PSAP_SORT1	psap_sort1b
0	Neu 1	L->R	Mac 1	PSEN1_NOTCH1	psen1_notch1a
0	Neu 1	L->R	Mac 1	PSEN1_NOTCH2	psen1_notch2
0	Neu 1	L->R	Mac 1	RLN3_ADRB2	rln3a_adrb2a
0	Neu 1	L->R	Mac 1	RLN3_GPR84	rln3a_gpr84
0	Neu 1	L->R	Mac 1	RLN3_RAMP2	rln3a_ramp2
0	Neu 1	L->R	Mac 1	RPS19_C5AR1	rps19_CABZ01041494.1
0	Neu 1	L->R	Mac 1	RTN4_NGFR	rtn4a_ngfrb
0	Neu 1	L->R	Mac 1	SERPINE2_LRP1	serpine2_lrp1ab
0	Neu 1	L->R	Mac 1	TGFB1_ACVRL1	tgfb1b_acvrl1
0	Neu 1	L->R	Mac 1	TGFB1_CXCR4	tgfb1b_cxcr4a
0	Neu 1	L->R	Mac 1	TGFB1_CXCR4	tgfb1b_cxcr4b
0	Neu 1	L->R	Mac 1	TGFB1_ITGAV	tgfb1b_itgav
0	Neu 1	L->R	Mac 1	TGFB1_ITGB1	tgfb1b_itgb1b
0	Neu 1	L->R	Mac 1	TGFB1_SMAD3	tgfb1b_smad3a
0	Neu 1	L->R	Mac 1	TIMP2_ITGB1	timp2b_itgb1b
0	Neu 1	L->R	Mac 1	TNF_NOTCH1	tnfb_notch1a
0	Neu 1	L->R	Mac 1	TNF_TNFRSF1B	tnfb_tnfrsf1b
0	Neu 1	L->R	Mac 1	TNF_TRADD	tnfb_tradd
0	Neu 1	L->R	Mac 1	UBA52_NOTCH1	uba52_notch1a
0	Neu 1	L->R	Mac 1	VEGFA_GPC1	vegfab_gpc1b
0	Neu 1	L->R	Mac 1	VEGFA_ITGAV	vegfab_itgav
0	Neu 1	L->R	Mac 1	VEGFA_ITGB1	vegfab_itgb1b
0	Neu 1	L->R	Mac 1	VEGFA_NRP1	vegfab_nrp1a
1	Neu 1	L->R	Mac 2	ACTR2_ADRB2	actr2a_adrb2a
1	Neu 1	L->R	Mac 2	ADAM10_GPNMB	adam10a_gpnmb
1	Neu 1	L->R	Mac 2	ADAM10_IL6R	adam10a_il6r
1	Neu 1	L->R	Mac 2	ADAM10_NOTCH1	adam10a_notch1a
1	Neu 1	L->R	Mac 2	ADAM10_NOTCH2	adam10a_notch2
1	Neu 1	L->R	Mac 2	ADAM10_TSPAN14	adam10a_tspan14
1	Neu 1	L->R	Mac 2	ADAM17_IL6R	adam17a_il6r
1	Neu 1	L->R	Mac 2	ADAM17_ITGA5	adam17a_itga5
1	Neu 1	L->R	Mac 2	ADAM17_NOTCH1	adam17a_notch1a
1	Neu 1	L->R	Mac 2	ADAM28_ITGA4	adam28_itga4
1	Neu 1	L->R	Mac 2	ADM_ADRB2	adma_adrb2a
1	Neu 1	L->R	Mac 2	ADM_GPR84	adma_gpr84
1	Neu 1	L->R	Mac 2	AGTRAP_RACK1	agtrap_rack1
1	Neu 1	L->R	Mac 2	APOE_ABCA1	apoeb_abca1a
1	Neu 1	L->R	Mac 2	APOE_ABCA1	apoeb_abca1b
1	Neu 1	L->R	Mac 2	APOE_LRP1	apoeb_lrp1ab
1	Neu 1	L->R	Mac 2	APOE_SCARB1	apoeb_scarb1
1	Neu 1	L->R	Mac 2	ARF6_SMAP1	arf6a_smap1
1	Neu 1	L->R	Mac 2	ARF6_SMAP1	arf6b_smap1
1	Neu 1	L->R	Mac 2	ARPC5_ADRB2	arpc5a_adrb2a
1	Neu 1	L->R	Mac 2	ARPC5_ADRB2	arpc5b_adrb2a
1	Neu 1	L->R	Mac 2	CALM2_ABCA1	calm3a_abca1a
1	Neu 1	L->R	Mac 2	CALM2_ABCA1	calm3a_abca1b
1	Neu 1	L->R	Mac 2	CALM2_KCNQ5	calm3a_kcnq5b
1	Neu 1	L->R	Mac 2	CALM2_ABCA1	calm2a_abca1a
1	Neu 1	L->R	Mac 2	CALM2_ABCA1	calm2a_abca1b
1	Neu 1	L->R	Mac 2	CALM2_KCNQ5	calm2a_kcnq5b
1	Neu 1	L->R	Mac 2	CALR_LRP1	calr_lrp1ab
1	Neu 1	L->R	Mac 2	CD99_CD81	cd99_cd81a
1	Neu 1	L->R	Mac 2	CNTF_IL6R	m17_il6r
1	Neu 1	L->R	Mac 2	CSF3_CSF1R	csf3b_csf1ra
1	Neu 1	L->R	Mac 2	CSF3_CSF1R	csf3b_csf1rb
1	Neu 1	L->R	Mac 2	CXCL9_CXCR3	BX323596.2_cxcr3.3
1	Neu 1	L->R	Mac 2	F13A1_ITGA4	f13a1b_itga4
1	Neu 1	L->R	Mac 2	GNAI2_ADCY7	gnai2b_adcy7
1	Neu 1	L->R	Mac 2	GNAI2_C5AR1	gnai2b_CABZ01041494.1
1	Neu 1	L->R	Mac 2	GNAI2_CXCR3	gnai2b_cxcr3.3
1	Neu 1	L->R	Mac 2	GNAI2_S1PR4	gnai2b_s1pr4
1	Neu 1	L->R	Mac 2	GNAI2_ADCY7	gnai2a_adcy7
1	Neu 1	L->R	Mac 2	GNAI2_C5AR1	gnai2a_CABZ01041494.1
1	Neu 1	L->R	Mac 2	GNAI2_CXCR3	gnai2a_cxcr3.3
1	Neu 1	L->R	Mac 2	GNAI2_S1PR4	gnai2a_s1pr4
1	Neu 1	L->R	Mac 2	GNAS_ADCY7	gnas_adcy7
1	Neu 1	L->R	Mac 2	GRN_SORT1	grn1_sort1b
1	Neu 1	L->R	Mac 2	GRN_SORT1	grn2_sort1b
1	Neu 1	L->R	Mac 2	HBEGF_CD82	hbegfa_cd82b
1	Neu 1	L->R	Mac 2	HBEGF_CD82	hbegfb_cd82b
1	Neu 1	L->R	Mac 2	HMGB1_AGER	hmgb1a_si:ch211-79k12.1
1	Neu 1	L->R	Mac 2	HMGB1_CXCR4	hmgb1a_cxcr4a
1	Neu 1	L->R	Mac 2	HMGB1_CXCR4	hmgb1a_cxcr4b
1	Neu 1	L->R	Mac 2	HSP90AA1_LRP1	hsp90aa1.2_lrp1ab
1	Neu 1	L->R	Mac 2	HSP90B1_LRP1	hsp90b1_lrp1ab
1	Neu 1	L->R	Mac 2	HSPA8_ADRB2	hspa8_adrb2a
1	Neu 1	L->R	Mac 2	ICAM3_ITGB2	si:ch211-66e2.3_itgb2
1	Neu 1	L->R	Mac 2	ICAM3_ITGB2	si:ch73-208g10.1_itgb2
1	Neu 1	L->R	Mac 2	ICAM3_ITGB2	icam3_itgb2
1	Neu 1	L->R	Mac 2	IL16_CD4	il16_dicp2.1
1	Neu 1	L->R	Mac 2	IL1B_ADRB2	il1b_adrb2a
1	Neu 1	L->R	Mac 2	IL1B_IL1R1	il1b_zmp:0000000936
1	Neu 1	L->R	Mac 2	INHBA_SMAD3	inhbaa_smad3a
1	Neu 1	L->R	Mac 2	LTF_LRP1	tfa_lrp1ab
1	Neu 1	L->R	Mac 2	MFNG_NOTCH1	mfng_notch1a
1	Neu 1	L->R	Mac 2	MFNG_NOTCH2	mfng_notch2
1	Neu 1	L->R	Mac 2	MIF_CD74	mif_cd74a
1	Neu 1	L->R	Mac 2	MIF_CD74	mif_cd74b
1	Neu 1	L->R	Mac 2	MIF_CXCR4	mif_cxcr4a
1	Neu 1	L->R	Mac 2	MIF_CXCR4	mif_cxcr4b
1	Neu 1	L->R	Mac 2	MMP9_ITGB2	mmp9_itgb2
1	Neu 1	L->R	Mac 2	MMP9_LRP1	mmp9_lrp1ab
1	Neu 1	L->R	Mac 2	NUCB2_ERAP1	nucb2a_erap1b
1	Neu 1	L->R	Mac 2	PROS1_MERTK	pros1_mertka
1	Neu 1	L->R	Mac 2	PSAP_LRP1	psap_lrp1ab
1	Neu 1	L->R	Mac 2	PSAP_SORT1	psap_sort1b
1	Neu 1	L->R	Mac 2	PSEN1_NOTCH1	psen1_notch1a
1	Neu 1	L->R	Mac 2	PSEN1_NOTCH2	psen1_notch2
1	Neu 1	L->R	Mac 2	RLN3_ADRB2	rln3a_adrb2a
1	Neu 1	L->R	Mac 2	RLN3_GPR84	rln3a_gpr84
1	Neu 1	L->R	Mac 2	RPS19_C5AR1	rps19_CABZ01041494.1
1	Neu 1	L->R	Mac 2	SERPINE2_LRP1	serpine2_lrp1ab
1	Neu 1	L->R	Mac 2	TGFB1_ACVRL1	tgfb1b_acvrl1
1	Neu 1	L->R	Mac 2	TGFB1_CXCR4	tgfb1b_cxcr4a
1	Neu 1	L->R	Mac 2	TGFB1_CXCR4	tgfb1b_cxcr4b
1	Neu 1	L->R	Mac 2	TGFB1_SMAD3	tgfb1b_smad3a
1	Neu 1	L->R	Mac 2	TNF_NOTCH1	tnfb_notch1a
1	Neu 1	L->R	Mac 2	TNF_TRADD	tnfb_tradd
1	Neu 1	L->R	Mac 2	UBA52_NOTCH1	uba52_notch1a
1	Neu 1	L->R	Mac 2	VEGFA_GPC1	vegfab_gpc1b
2	Neu 1	L->R	Mac 3	ACTR2_ADRB2	actr2a_adrb2a
2	Neu 1	L->R	Mac 3	ADAM10_IL6R	adam10a_il6r
2	Neu 1	L->R	Mac 3	ADAM10_NOTCH1	adam10a_notch1a
2	Neu 1	L->R	Mac 3	ADAM10_NOTCH2	adam10a_notch2
2	Neu 1	L->R	Mac 3	ADAM10_TSPAN14	adam10a_tspan14
2	Neu 1	L->R	Mac 3	ADAM17_IL6R	adam17a_il6r
2	Neu 1	L->R	Mac 3	ADAM17_ITGA5	adam17a_itga5
2	Neu 1	L->R	Mac 3	ADAM17_ITGB1	adam17a_itgb1b
2	Neu 1	L->R	Mac 3	ADAM17_NOTCH1	adam17a_notch1a
2	Neu 1	L->R	Mac 3	ADAM28_ITGA4	adam28_itga4
2	Neu 1	L->R	Mac 3	ADM_ADRB2	adma_adrb2a
2	Neu 1	L->R	Mac 3	ADM_GPR84	adma_gpr84
2	Neu 1	L->R	Mac 3	AGTRAP_RACK1	agtrap_rack1
2	Neu 1	L->R	Mac 3	APOE_ABCA1	apoeb_abca1a
2	Neu 1	L->R	Mac 3	APOE_ABCA1	apoeb_abca1b
2	Neu 1	L->R	Mac 3	APOE_LRP1	apoeb_lrp1ab
2	Neu 1	L->R	Mac 3	APOE_SCARB1	apoeb_scarb1
2	Neu 1	L->R	Mac 3	APOE_SDC2	apoeb_sdc2
2	Neu 1	L->R	Mac 3	ARF6_SMAP1	arf6a_smap1
2	Neu 1	L->R	Mac 3	ARF6_SMAP1	arf6b_smap1
2	Neu 1	L->R	Mac 3	ARPC5_ADRB2	arpc5a_adrb2a
2	Neu 1	L->R	Mac 3	ARPC5_ADRB2	arpc5b_adrb2a
2	Neu 1	L->R	Mac 3	CALM2_ABCA1	calm3a_abca1a
2	Neu 1	L->R	Mac 3	CALM2_ABCA1	calm3a_abca1b
2	Neu 1	L->R	Mac 3	CALM2_INSR	calm3a_insra
2	Neu 1	L->R	Mac 3	CALM2_ABCA1	calm2a_abca1a
2	Neu 1	L->R	Mac 3	CALM2_ABCA1	calm2a_abca1b
2	Neu 1	L->R	Mac 3	CALM2_INSR	calm2a_insra
2	Neu 1	L->R	Mac 3	CALR_ITGAV	calr_itgav
2	Neu 1	L->R	Mac 3	CALR_LRP1	calr_lrp1ab
2	Neu 1	L->R	Mac 3	CALR_SCARF1	calr_scarf1
2	Neu 1	L->R	Mac 3	CD99_CD81	cd99_cd81a
2	Neu 1	L->R	Mac 3	CNTF_IL6R	m17_il6r
2	Neu 1	L->R	Mac 3	CSF3_CSF1R	csf3b_csf1ra
2	Neu 1	L->R	Mac 3	CSF3_CSF1R	csf3b_csf1rb
2	Neu 1	L->R	Mac 3	CSF3_CSF3R	csf3b_csf3r
2	Neu 1	L->R	Mac 3	CXCL9_CXCR3	BX323596.2_cxcr3.3
2	Neu 1	L->R	Mac 3	F13A1_ITGA4	f13a1b_itga4
2	Neu 1	L->R	Mac 3	F13A1_ITGB1	f13a1b_itgb1b
2	Neu 1	L->R	Mac 3	GNAI2_ADCY7	gnai2b_adcy7
2	Neu 1	L->R	Mac 3	GNAI2_C5AR1	gnai2b_CABZ01041494.1
2	Neu 1	L->R	Mac 3	GNAI2_CXCR3	gnai2b_cxcr3.3
2	Neu 1	L->R	Mac 3	GNAI2_P2RY12	gnai2b_p2ry12
2	Neu 1	L->R	Mac 3	GNAI2_ADCY7	gnai2a_adcy7
2	Neu 1	L->R	Mac 3	GNAI2_C5AR1	gnai2a_CABZ01041494.1
2	Neu 1	L->R	Mac 3	GNAI2_CXCR3	gnai2a_cxcr3.3
2	Neu 1	L->R	Mac 3	GNAI2_P2RY12	gnai2a_p2ry12
2	Neu 1	L->R	Mac 3	GNAS_ADCY7	gnas_adcy7
2	Neu 1	L->R	Mac 3	GPI_AMFR	gpia_amfra
2	Neu 1	L->R	Mac 3	GRN_SORT1	grn1_sort1b
2	Neu 1	L->R	Mac 3	GRN_TNFRSF1B	grn1_tnfrsf1b
2	Neu 1	L->R	Mac 3	GRN_SORT1	grn2_sort1b
2	Neu 1	L->R	Mac 3	GRN_TNFRSF1B	grn2_tnfrsf1b
2	Neu 1	L->R	Mac 3	HBEGF_CD82	hbegfa_cd82a
2	Neu 1	L->R	Mac 3	HBEGF_CD82	hbegfb_cd82a
2	Neu 1	L->R	Mac 3	HMGB1_AGER	hmgb1a_si:ch211-79k12.1
2	Neu 1	L->R	Mac 3	HMGB1_CXCR4	hmgb1a_cxcr4a
2	Neu 1	L->R	Mac 3	HMGB1_CXCR4	hmgb1a_cxcr4b
2	Neu 1	L->R	Mac 3	HSP90AA1_LRP1	hsp90aa1.2_lrp1ab
2	Neu 1	L->R	Mac 3	HSP90B1_LRP1	hsp90b1_lrp1ab
2	Neu 1	L->R	Mac 3	HSPA8_ADRB2	hspa8_adrb2a
2	Neu 1	L->R	Mac 3	ICAM3_ITGB2	si:ch211-66e2.3_itgb2
2	Neu 1	L->R	Mac 3	ICAM3_ITGB2	si:ch73-208g10.1_itgb2
2	Neu 1	L->R	Mac 3	ICAM3_ITGB2	icam3_itgb2
2	Neu 1	L->R	Mac 3	IL16_CD4	il16_cd4-1
2	Neu 1	L->R	Mac 3	IL16_CD4	il16_dicp3.1
2	Neu 1	L->R	Mac 3	IL16_CD4	il16_dicp2.1
2	Neu 1	L->R	Mac 3	IL1B_ADRB2	il1b_adrb2a
2	Neu 1	L->R	Mac 3	IL1B_IL1R1	il1b_CABZ01054965.1
2	Neu 1	L->R	Mac 3	IL1B_IL1R1	il1b_zmp:0000000936
2	Neu 1	L->R	Mac 3	INHBA_SMAD3	inhbaa_smad3a
2	Neu 1	L->R	Mac 3	IRAK4_TLR6	irak4_tlr1
2	Neu 1	L->R	Mac 3	LTF_LRP1	tfa_lrp1ab
2	Neu 1	L->R	Mac 3	MFNG_NOTCH1	mfng_notch1a
2	Neu 1	L->R	Mac 3	MFNG_NOTCH2	mfng_notch2
2	Neu 1	L->R	Mac 3	MIF_CD74	mif_cd74a
2	Neu 1	L->R	Mac 3	MIF_CD74	mif_cd74b
2	Neu 1	L->R	Mac 3	MIF_CXCR4	mif_cxcr4a
2	Neu 1	L->R	Mac 3	MIF_CXCR4	mif_cxcr4b
2	Neu 1	L->R	Mac 3	MMP9_ITGB2	mmp9_itgb2
2	Neu 1	L->R	Mac 3	MMP9_LRP1	mmp9_lrp1ab
2	Neu 1	L->R	Mac 3	NAMPT_INSR	nampta_insra
2	Neu 1	L->R	Mac 3	NUCB2_ERAP1	nucb2a_erap1b
2	Neu 1	L->R	Mac 3	PROS1_MERTK	pros1_mertka
2	Neu 1	L->R	Mac 3	PSAP_LRP1	psap_lrp1ab
2	Neu 1	L->R	Mac 3	PSAP_SORT1	psap_sort1b
2	Neu 1	L->R	Mac 3	PSEN1_NOTCH1	psen1_notch1a
2	Neu 1	L->R	Mac 3	PSEN1_NOTCH2	psen1_notch2
2	Neu 1	L->R	Mac 3	RLN3_ADRB2	rln3a_adrb2a
2	Neu 1	L->R	Mac 3	RLN3_GPR84	rln3a_gpr84
2	Neu 1	L->R	Mac 3	RPS19_C5AR1	rps19_CABZ01041494.1
2	Neu 1	L->R	Mac 3	RTN4_NGFR	rtn4a_ngfrb
2	Neu 1	L->R	Mac 3	SERPINE2_LRP1	serpine2_lrp1ab
2	Neu 1	L->R	Mac 3	TGFB1_ACVRL1	tgfb1b_acvrl1
2	Neu 1	L->R	Mac 3	TGFB1_CXCR4	tgfb1b_cxcr4a
2	Neu 1	L->R	Mac 3	TGFB1_CXCR4	tgfb1b_cxcr4b
2	Neu 1	L->R	Mac 3	TGFB1_ITGAV	tgfb1b_itgav
2	Neu 1	L->R	Mac 3	TGFB1_ITGB1	tgfb1b_itgb1b
2	Neu 1	L->R	Mac 3	TGFB1_ITGB5	tgfb1b_itgb5
2	Neu 1	L->R	Mac 3	TGFB1_SDC2	tgfb1b_sdc2
2	Neu 1	L->R	Mac 3	TGFB1_SMAD3	tgfb1b_smad3a
2	Neu 1	L->R	Mac 3	TIMP2_ITGB1	timp2b_itgb1b
2	Neu 1	L->R	Mac 3	TLN1_ITGB5	tln1_itgb5
2	Neu 1	L->R	Mac 3	TNF_NOTCH1	tnfb_notch1a
2	Neu 1	L->R	Mac 3	TNF_TNFRSF1B	tnfb_tnfrsf1b
2	Neu 1	L->R	Mac 3	TNF_TNFRSF21	tnfb_tnfrsf21
2	Neu 1	L->R	Mac 3	TNF_TRADD	tnfb_tradd
2	Neu 1	L->R	Mac 3	UBA52_NOTCH1	uba52_notch1a
2	Neu 1	L->R	Mac 3	VEGFA_GPC1	vegfab_gpc1b
2	Neu 1	L->R	Mac 3	VEGFA_ITGAV	vegfab_itgav
2	Neu 1	L->R	Mac 3	VEGFA_ITGB1	vegfab_itgb1b
2	Neu 1	L->R	Mac 3	VEGFA_NRP1	vegfab_nrp1a
2	Neu 1	L->R	Mac 3	VEGFA_NRP2	vegfab_nrp2b
3	Neu 1	L->R	Mac 4	ACTR2_ADRB2	actr2a_adrb2a
3	Neu 1	L->R	Mac 4	ADAM10_IL6R	adam10a_il6r
3	Neu 1	L->R	Mac 4	ADAM10_NOTCH1	adam10a_notch1a
3	Neu 1	L->R	Mac 4	ADAM10_NOTCH2	adam10a_notch2
3	Neu 1	L->R	Mac 4	ADAM10_TSPAN14	adam10a_tspan14
3	Neu 1	L->R	Mac 4	ADAM17_IL6R	adam17a_il6r
3	Neu 1	L->R	Mac 4	ADAM17_ITGA5	adam17a_itga5
3	Neu 1	L->R	Mac 4	ADAM17_NOTCH1	adam17a_notch1a
3	Neu 1	L->R	Mac 4	ADAM28_ITGA4	adam28_itga4
3	Neu 1	L->R	Mac 4	ADM_ADRB2	adma_adrb2a
3	Neu 1	L->R	Mac 4	ADM_GPR84	adma_gpr84
3	Neu 1	L->R	Mac 4	AGTRAP_RACK1	agtrap_rack1
3	Neu 1	L->R	Mac 4	APOE_ABCA1	apoeb_abca1a
3	Neu 1	L->R	Mac 4	APOE_ABCA1	apoeb_abca1b
3	Neu 1	L->R	Mac 4	ARF6_SMAP1	arf6a_smap1
3	Neu 1	L->R	Mac 4	ARF6_SMAP1	arf6b_smap1
3	Neu 1	L->R	Mac 4	ARPC5_ADRB2	arpc5a_adrb2a
3	Neu 1	L->R	Mac 4	ARPC5_ADRB2	arpc5b_adrb2a
3	Neu 1	L->R	Mac 4	CALM2_ABCA1	calm3a_abca1a
3	Neu 1	L->R	Mac 4	CALM2_ABCA1	calm3a_abca1b
3	Neu 1	L->R	Mac 4	CALM2_ABCA1	calm2a_abca1a
3	Neu 1	L->R	Mac 4	CALM2_ABCA1	calm2a_abca1b
3	Neu 1	L->R	Mac 4	CALR_ITGAV	calr_itgav
3	Neu 1	L->R	Mac 4	CALR_SCARF1	calr_scarf1
3	Neu 1	L->R	Mac 4	CD99_CD81	cd99_cd81a
3	Neu 1	L->R	Mac 4	CNTF_IL6R	m17_il6r
3	Neu 1	L->R	Mac 4	CSF3_CSF1R	csf3b_csf1ra
3	Neu 1	L->R	Mac 4	CSF3_CSF3R	csf3b_csf3r
3	Neu 1	L->R	Mac 4	CXCL9_CXCR3	BX323596.2_cxcr3.3
3	Neu 1	L->R	Mac 4	F13A1_ITGA4	f13a1b_itga4
3	Neu 1	L->R	Mac 4	GNAI2_ADCY7	gnai2b_adcy7
3	Neu 1	L->R	Mac 4	GNAI2_C5AR1	gnai2b_CABZ01041494.1
3	Neu 1	L->R	Mac 4	GNAI2_CXCR3	gnai2b_cxcr3.3
3	Neu 1	L->R	Mac 4	GNAI2_S1PR4	gnai2b_s1pr4
3	Neu 1	L->R	Mac 4	GNAI2_ADCY7	gnai2a_adcy7
3	Neu 1	L->R	Mac 4	GNAI2_C5AR1	gnai2a_CABZ01041494.1
3	Neu 1	L->R	Mac 4	GNAI2_CXCR3	gnai2a_cxcr3.3
3	Neu 1	L->R	Mac 4	GNAI2_S1PR4	gnai2a_s1pr4
3	Neu 1	L->R	Mac 4	GNAS_ADCY7	gnas_adcy7
3	Neu 1	L->R	Mac 4	GPI_AMFR	gpia_amfra
3	Neu 1	L->R	Mac 4	GRN_SORT1	grn1_sort1b
3	Neu 1	L->R	Mac 4	GRN_TNFRSF1B	grn1_tnfrsf1b
3	Neu 1	L->R	Mac 4	GRN_SORT1	grn2_sort1b
3	Neu 1	L->R	Mac 4	GRN_TNFRSF1B	grn2_tnfrsf1b
3	Neu 1	L->R	Mac 4	HBEGF_CD82	hbegfa_cd82a
3	Neu 1	L->R	Mac 4	HBEGF_CD82	hbegfb_cd82a
3	Neu 1	L->R	Mac 4	HMGB1_AGER	hmgb1a_si:ch211-79k12.1
3	Neu 1	L->R	Mac 4	HMGB1_CXCR4	hmgb1a_cxcr4a
3	Neu 1	L->R	Mac 4	HMGB1_CXCR4	hmgb1a_cxcr4b
3	Neu 1	L->R	Mac 4	HSPA8_ADRB2	hspa8_adrb2a
3	Neu 1	L->R	Mac 4	ICAM3_ITGB2	si:ch211-66e2.3_itgb2
3	Neu 1	L->R	Mac 4	ICAM3_ITGB2	si:ch73-208g10.1_itgb2
3	Neu 1	L->R	Mac 4	ICAM3_ITGB2	icam3_itgb2
3	Neu 1	L->R	Mac 4	IL16_CD4	il16_dicp3.1
3	Neu 1	L->R	Mac 4	IL16_CD4	il16_dicp2.1
3	Neu 1	L->R	Mac 4	IL16_CD4	il16_dicp2.2
3	Neu 1	L->R	Mac 4	IL1B_ADRB2	il1b_adrb2a
3	Neu 1	L->R	Mac 4	IL1B_IL1R1	il1b_CABZ01054965.1
3	Neu 1	L->R	Mac 4	INHBA_SMAD3	inhbaa_smad3a
3	Neu 1	L->R	Mac 4	MFNG_NOTCH1	mfng_notch1a
3	Neu 1	L->R	Mac 4	MFNG_NOTCH2	mfng_notch2
3	Neu 1	L->R	Mac 4	MIF_CD74	mif_cd74a
3	Neu 1	L->R	Mac 4	MIF_CD74	mif_cd74b
3	Neu 1	L->R	Mac 4	MIF_CXCR4	mif_cxcr4a
3	Neu 1	L->R	Mac 4	MIF_CXCR4	mif_cxcr4b
3	Neu 1	L->R	Mac 4	MMP9_ITGB2	mmp9_itgb2
3	Neu 1	L->R	Mac 4	NUCB2_ERAP1	nucb2a_erap1b
3	Neu 1	L->R	Mac 4	PROS1_MERTK	pros1_mertka
3	Neu 1	L->R	Mac 4	PSAP_SORT1	psap_sort1b
3	Neu 1	L->R	Mac 4	PSEN1_NOTCH1	psen1_notch1a
3	Neu 1	L->R	Mac 4	PSEN1_NOTCH2	psen1_notch2
3	Neu 1	L->R	Mac 4	RLN3_ADRB2	rln3a_adrb2a
3	Neu 1	L->R	Mac 4	RLN3_GPR84	rln3a_gpr84
3	Neu 1	L->R	Mac 4	RPS19_C5AR1	rps19_CABZ01041494.1
3	Neu 1	L->R	Mac 4	TGFB1_ACVRL1	tgfb1b_acvrl1
3	Neu 1	L->R	Mac 4	TGFB1_CXCR4	tgfb1b_cxcr4a
3	Neu 1	L->R	Mac 4	TGFB1_CXCR4	tgfb1b_cxcr4b
3	Neu 1	L->R	Mac 4	TGFB1_ITGAV	tgfb1b_itgav
3	Neu 1	L->R	Mac 4	TGFB1_SMAD3	tgfb1b_smad3a
3	Neu 1	L->R	Mac 4	TNF_NOTCH1	tnfb_notch1a
3	Neu 1	L->R	Mac 4	TNF_TNFRSF1B	tnfb_tnfrsf1b
3	Neu 1	L->R	Mac 4	TNF_TRADD	tnfb_tradd
3	Neu 1	L->R	Mac 4	UBA52_NOTCH1	uba52_notch1a
3	Neu 1	L->R	Mac 4	VEGFA_GPC1	vegfab_gpc1b
3	Neu 1	L->R	Mac 4	VEGFA_ITGAV	vegfab_itgav
3	Neu 1	L->R	Mac 4	VEGFA_NRP1	vegfab_nrp1a
4	Neu 1	L->R	Mac 5	ADAM10_IL6R	adam10a_il6r
4	Neu 1	L->R	Mac 5	ADAM10_NOTCH2	adam10a_notch2
4	Neu 1	L->R	Mac 5	ADAM10_TSPAN14	adam10a_tspan14
4	Neu 1	L->R	Mac 5	ADAM17_IL6R	adam17a_il6r
4	Neu 1	L->R	Mac 5	ADAM17_ITGA5	adam17a_itga5
4	Neu 1	L->R	Mac 5	ADM_GPR84	adma_gpr84
4	Neu 1	L->R	Mac 5	AGTRAP_RACK1	agtrap_rack1
4	Neu 1	L->R	Mac 5	APOE_ABCA1	apoeb_abca1a
4	Neu 1	L->R	Mac 5	APOE_ABCA1	apoeb_abca1b
4	Neu 1	L->R	Mac 5	ARF6_SMAP1	arf6a_smap1
4	Neu 1	L->R	Mac 5	ARF6_SMAP1	arf6b_smap1
4	Neu 1	L->R	Mac 5	CALM2_ABCA1	calm3a_abca1a
4	Neu 1	L->R	Mac 5	CALM2_ABCA1	calm3a_abca1b
4	Neu 1	L->R	Mac 5	CALM2_ABCA1	calm2a_abca1a
4	Neu 1	L->R	Mac 5	CALM2_ABCA1	calm2a_abca1b
4	Neu 1	L->R	Mac 5	CALR_SCARF1	calr_scarf1
4	Neu 1	L->R	Mac 5	CD99_CD81	cd99_cd81a
4	Neu 1	L->R	Mac 5	CNTF_IL6R	m17_il6r
4	Neu 1	L->R	Mac 5	CSF3_CSF1R	csf3b_csf1ra
4	Neu 1	L->R	Mac 5	CSF3_CSF1R	csf3b_csf1rb
4	Neu 1	L->R	Mac 5	CSF3_CSF3R	csf3b_csf3r
4	Neu 1	L->R	Mac 5	CXCL9_CXCR3	BX323596.2_cxcr3.3
4	Neu 1	L->R	Mac 5	GNAI2_ADCY7	gnai2b_adcy7
4	Neu 1	L->R	Mac 5	GNAI2_C5AR1	gnai2b_CABZ01041494.1
4	Neu 1	L->R	Mac 5	GNAI2_CXCR3	gnai2b_cxcr3.3
4	Neu 1	L->R	Mac 5	GNAI2_ADCY7	gnai2a_adcy7
4	Neu 1	L->R	Mac 5	GNAI2_C5AR1	gnai2a_CABZ01041494.1
4	Neu 1	L->R	Mac 5	GNAI2_CXCR3	gnai2a_cxcr3.3
4	Neu 1	L->R	Mac 5	GNAS_ADCY7	gnas_adcy7
4	Neu 1	L->R	Mac 5	HBEGF_CD82	hbegfa_cd82a
4	Neu 1	L->R	Mac 5	HBEGF_CD82	hbegfb_cd82a
4	Neu 1	L->R	Mac 5	HMGB1_AGER	hmgb1a_si:ch211-79k12.1
4	Neu 1	L->R	Mac 5	HMGB1_CXCR4	hmgb1a_cxcr4b
4	Neu 1	L->R	Mac 5	ICAM3_ITGB2	si:ch211-66e2.3_itgb2
4	Neu 1	L->R	Mac 5	ICAM3_ITGB2	si:ch73-208g10.1_itgb2
4	Neu 1	L->R	Mac 5	ICAM3_ITGB2	icam3_itgb2
4	Neu 1	L->R	Mac 5	IL16_CD4	il16_cd4-1
4	Neu 1	L->R	Mac 5	IL16_CD4	il16_dicp2.1
4	Neu 1	L->R	Mac 5	INHBA_SMAD3	inhbaa_smad3a
4	Neu 1	L->R	Mac 5	MFNG_NOTCH2	mfng_notch2
4	Neu 1	L->R	Mac 5	MIF_CD74	mif_cd74a
4	Neu 1	L->R	Mac 5	MIF_CD74	mif_cd74b
4	Neu 1	L->R	Mac 5	MIF_CXCR4	mif_cxcr4b
4	Neu 1	L->R	Mac 5	MMP9_ITGB2	mmp9_itgb2
4	Neu 1	L->R	Mac 5	NUCB2_ERAP1	nucb2a_erap1b
4	Neu 1	L->R	Mac 5	PSEN1_NOTCH2	psen1_notch2
4	Neu 1	L->R	Mac 5	RLN3_GPR84	rln3a_gpr84
4	Neu 1	L->R	Mac 5	RPS19_C5AR1	rps19_CABZ01041494.1
4	Neu 1	L->R	Mac 5	TGFB1_ACVRL1	tgfb1b_acvrl1
4	Neu 1	L->R	Mac 5	TGFB1_CXCR4	tgfb1b_cxcr4b
4	Neu 1	L->R	Mac 5	TGFB1_SMAD3	tgfb1b_smad3a
4	Neu 1	L->R	Mac 5	TNF_TRADD	tnfb_tradd
4	Neu 1	L->R	Mac 5	VEGFA_GPC1	vegfab_gpc1b
5	Neu 1	L->R	Mac 6	ADAM10_IL6R	adam10a_il6r
5	Neu 1	L->R	Mac 6	ADAM10_NOTCH2	adam10a_si:ch73-281k2.5
5	Neu 1	L->R	Mac 6	ADAM10_NOTCH2	adam10a_notch2
5	Neu 1	L->R	Mac 6	ADAM10_TSPAN14	adam10a_tspan14
5	Neu 1	L->R	Mac 6	ADAM17_IL6R	adam17a_il6r
5	Neu 1	L->R	Mac 6	ADAM17_ITGA5	adam17a_itga5
5	Neu 1	L->R	Mac 6	ADAM28_ITGA4	adam28_itga4
5	Neu 1	L->R	Mac 6	ADM_GPR84	adma_gpr84
5	Neu 1	L->R	Mac 6	AGTRAP_RACK1	agtrap_rack1
5	Neu 1	L->R	Mac 6	APOE_ABCA1	apoeb_abca1a
5	Neu 1	L->R	Mac 6	APOE_ABCA1	apoeb_abca1b
5	Neu 1	L->R	Mac 6	ARF6_SMAP1	arf6a_smap1
5	Neu 1	L->R	Mac 6	ARF6_SMAP1	arf6b_smap1
5	Neu 1	L->R	Mac 6	BSG_SELE	bsg_selp
5	Neu 1	L->R	Mac 6	CALM2_ABCA1	calm3a_abca1a
5	Neu 1	L->R	Mac 6	CALM2_ABCA1	calm3a_abca1b
5	Neu 1	L->R	Mac 6	CALM2_ABCA1	calm2a_abca1a
5	Neu 1	L->R	Mac 6	CALM2_ABCA1	calm2a_abca1b
5	Neu 1	L->R	Mac 6	CALR_ITGAV	calr_itgav
5	Neu 1	L->R	Mac 6	CALR_SCARF1	calr_scarf1
5	Neu 1	L->R	Mac 6	CD99_CD81	cd99_cd81a
5	Neu 1	L->R	Mac 6	CNTF_IL6R	m17_il6r
5	Neu 1	L->R	Mac 6	CSF3_CSF1R	csf3b_csf1ra
5	Neu 1	L->R	Mac 6	CSF3_CSF1R	csf3b_csf1rb
5	Neu 1	L->R	Mac 6	CSF3_CSF3R	csf3b_csf3r
5	Neu 1	L->R	Mac 6	CXCL9_CXCR3	BX323596.2_cxcr3.3
5	Neu 1	L->R	Mac 6	F13A1_ITGA4	f13a1b_itga4
5	Neu 1	L->R	Mac 6	GNAI2_ADCY7	gnai2b_adcy7
5	Neu 1	L->R	Mac 6	GNAI2_C5AR1	gnai2b_CABZ01041494.1
5	Neu 1	L->R	Mac 6	GNAI2_CXCR3	gnai2b_cxcr3.3
5	Neu 1	L->R	Mac 6	GNAI2_S1PR4	gnai2b_s1pr4
5	Neu 1	L->R	Mac 6	GNAI2_ADCY7	gnai2a_adcy7
5	Neu 1	L->R	Mac 6	GNAI2_C5AR1	gnai2a_CABZ01041494.1
5	Neu 1	L->R	Mac 6	GNAI2_CXCR3	gnai2a_cxcr3.3
5	Neu 1	L->R	Mac 6	GNAI2_S1PR4	gnai2a_s1pr4
5	Neu 1	L->R	Mac 6	GNAS_ADCY7	gnas_adcy7
5	Neu 1	L->R	Mac 6	GPI_AMFR	gpia_amfra
5	Neu 1	L->R	Mac 6	HMGB1_AGER	hmgb1a_si:ch211-79k12.1
5	Neu 1	L->R	Mac 6	HMGB1_CXCR4	hmgb1a_cxcr4a
5	Neu 1	L->R	Mac 6	HMGB1_CXCR4	hmgb1a_cxcr4b
5	Neu 1	L->R	Mac 6	ICAM3_ITGB2	si:ch211-66e2.3_itgb2
5	Neu 1	L->R	Mac 6	ICAM3_ITGB2	si:ch73-208g10.1_itgb2
5	Neu 1	L->R	Mac 6	ICAM3_ITGB2	icam3_itgb2
5	Neu 1	L->R	Mac 6	IL16_CD4	il16_dicp3.1
5	Neu 1	L->R	Mac 6	IL16_CD4	il16_dicp2.1
5	Neu 1	L->R	Mac 6	IL16_CD4	il16_dicp2.2
5	Neu 1	L->R	Mac 6	INHBA_SMAD3	inhbaa_smad3a
5	Neu 1	L->R	Mac 6	MFNG_NOTCH2	mfng_si:ch73-281k2.5
5	Neu 1	L->R	Mac 6	MFNG_NOTCH2	mfng_notch2
5	Neu 1	L->R	Mac 6	MIF_CD74	mif_cd74a
5	Neu 1	L->R	Mac 6	MIF_CD74	mif_cd74b
5	Neu 1	L->R	Mac 6	MIF_CXCR4	mif_cxcr4a
5	Neu 1	L->R	Mac 6	MIF_CXCR4	mif_cxcr4b
5	Neu 1	L->R	Mac 6	MMP9_ITGB2	mmp9_itgb2
5	Neu 1	L->R	Mac 6	NUCB2_ERAP1	nucb2a_erap1b
5	Neu 1	L->R	Mac 6	PSEN1_NOTCH2	psen1_si:ch73-281k2.5
5	Neu 1	L->R	Mac 6	PSEN1_NOTCH2	psen1_notch2
5	Neu 1	L->R	Mac 6	RLN3_GPR84	rln3a_gpr84
5	Neu 1	L->R	Mac 6	RPS19_C5AR1	rps19_CABZ01041494.1
5	Neu 1	L->R	Mac 6	TGFB1_CXCR4	tgfb1b_cxcr4a
5	Neu 1	L->R	Mac 6	TGFB1_CXCR4	tgfb1b_cxcr4b
5	Neu 1	L->R	Mac 6	TGFB1_ITGAV	tgfb1b_itgav
5	Neu 1	L->R	Mac 6	TGFB1_SMAD3	tgfb1b_smad3a
5	Neu 1	L->R	Mac 6	TNF_TRADD	tnfb_tradd
5	Neu 1	L->R	Mac 6	VEGFA_GPC1	vegfab_gpc1b
5	Neu 1	L->R	Mac 6	VEGFA_ITGAV	vegfab_itgav
6	Neu 1	L->R	Mac 7	ADAM10_IL6R	adam10a_il6r
6	Neu 1	L->R	Mac 7	ADAM10_NOTCH2	adam10a_notch2
6	Neu 1	L->R	Mac 7	ADAM10_TSPAN14	adam10a_tspan14
6	Neu 1	L->R	Mac 7	ADAM17_IL6R	adam17a_il6r
6	Neu 1	L->R	Mac 7	ADAM17_ITGB1	adam17a_CABZ01058721.1
6	Neu 1	L->R	Mac 7	ADAM28_ITGA4	adam28_itga4
6	Neu 1	L->R	Mac 7	ADM_GPR84	adma_gpr84
6	Neu 1	L->R	Mac 7	AGTRAP_RACK1	agtrap_rack1
6	Neu 1	L->R	Mac 7	APOE_ABCA1	apoeb_abca1a
6	Neu 1	L->R	Mac 7	APOE_ABCA1	apoeb_abca1b
6	Neu 1	L->R	Mac 7	APOE_SORL1	apoeb_sorl1
6	Neu 1	L->R	Mac 7	ARF6_SMAP1	arf6a_smap1
6	Neu 1	L->R	Mac 7	ARF6_SMAP1	arf6b_smap1
6	Neu 1	L->R	Mac 7	CALM2_ABCA1	calm3a_abca1a
6	Neu 1	L->R	Mac 7	CALM2_ABCA1	calm3a_abca1b
6	Neu 1	L->R	Mac 7	CALM2_ABCA1	calm2a_abca1a
6	Neu 1	L->R	Mac 7	CALM2_ABCA1	calm2a_abca1b
6	Neu 1	L->R	Mac 7	CD99_CD81	cd99_cd81a
6	Neu 1	L->R	Mac 7	CNTF_IL6R	m17_il6r
6	Neu 1	L->R	Mac 7	CSF3_CSF1R	csf3b_csf1ra
6	Neu 1	L->R	Mac 7	CSF3_CSF1R	csf3b_csf1rb
6	Neu 1	L->R	Mac 7	CSF3_CSF3R	csf3b_csf3r
6	Neu 1	L->R	Mac 7	CXCL9_CXCR3	BX323596.2_cxcr3.3
6	Neu 1	L->R	Mac 7	F13A1_ITGA4	f13a1b_itga4
6	Neu 1	L->R	Mac 7	F13A1_ITGB1	f13a1b_CABZ01058721.1
6	Neu 1	L->R	Mac 7	GNAI2_ADCY7	gnai2b_adcy7
6	Neu 1	L->R	Mac 7	GNAI2_C5AR1	gnai2b_CABZ01041494.1
6	Neu 1	L->R	Mac 7	GNAI2_CXCR3	gnai2b_cxcr3.3
6	Neu 1	L->R	Mac 7	GNAI2_ADCY7	gnai2a_adcy7
6	Neu 1	L->R	Mac 7	GNAI2_C5AR1	gnai2a_CABZ01041494.1
6	Neu 1	L->R	Mac 7	GNAI2_CXCR3	gnai2a_cxcr3.3
6	Neu 1	L->R	Mac 7	GNAS_ADCY7	gnas_adcy7
6	Neu 1	L->R	Mac 7	GRN_SORT1	grn1_sort1b
6	Neu 1	L->R	Mac 7	GRN_SORT1	grn2_sort1b
6	Neu 1	L->R	Mac 7	HBEGF_CD82	hbegfa_cd82a
6	Neu 1	L->R	Mac 7	HBEGF_CD82	hbegfb_cd82a
6	Neu 1	L->R	Mac 7	HMGB1_AGER	hmgb1a_si:ch211-79k12.1
6	Neu 1	L->R	Mac 7	HMGB1_CXCR4	hmgb1a_cxcr4b
6	Neu 1	L->R	Mac 7	ICAM3_ITGB2	si:ch211-66e2.3_itgb2
6	Neu 1	L->R	Mac 7	ICAM3_ITGB2	si:ch73-208g10.1_itgb2
6	Neu 1	L->R	Mac 7	ICAM3_ITGB2	icam3_itgb2
6	Neu 1	L->R	Mac 7	IL16_CD4	il16_cd4-1
6	Neu 1	L->R	Mac 7	IL16_CD4	il16_dicp3.3
6	Neu 1	L->R	Mac 7	IL16_CD4	il16_dicp3.1
6	Neu 1	L->R	Mac 7	IL16_CD4	il16_dicp2.1
6	Neu 1	L->R	Mac 7	MFNG_NOTCH2	mfng_notch2
6	Neu 1	L->R	Mac 7	MIF_CD74	mif_cd74a
6	Neu 1	L->R	Mac 7	MIF_CD74	mif_cd74b
6	Neu 1	L->R	Mac 7	MIF_CXCR4	mif_cxcr4b
6	Neu 1	L->R	Mac 7	MMP9_ITGB2	mmp9_itgb2
6	Neu 1	L->R	Mac 7	NUCB2_ERAP1	nucb2a_erap1b
6	Neu 1	L->R	Mac 7	PSAP_SORT1	psap_sort1b
6	Neu 1	L->R	Mac 7	PSEN1_NOTCH2	psen1_notch2
6	Neu 1	L->R	Mac 7	RLN3_GPR84	rln3a_gpr84
6	Neu 1	L->R	Mac 7	RPS19_C5AR1	rps19_CABZ01041494.1
6	Neu 1	L->R	Mac 7	TGFB1_ACVRL1	tgfb1b_acvrl1
6	Neu 1	L->R	Mac 7	TGFB1_CXCR4	tgfb1b_cxcr4b
6	Neu 1	L->R	Mac 7	TGFB1_ITGB1	tgfb1b_CABZ01058721.1
6	Neu 1	L->R	Mac 7	TIMP2_ITGB1	timp2b_CABZ01058721.1
6	Neu 1	L->R	Mac 7	TNF_TRADD	tnfb_tradd
6	Neu 1	L->R	Mac 7	VEGFA_GPC1	vegfab_gpc1b
6	Neu 1	L->R	Mac 7	VEGFA_ITGB1	vegfab_CABZ01058721.1
6	Neu 1	L->R	Mac 7	VEGFA_NRP1	vegfab_nrp1a
7	Neu 1	L->R	MN	ADAM10_GPNMB	adam10a_gpnmb
7	Neu 1	L->R	MN	ADAM10_IL6R	adam10a_il6r
7	Neu 1	L->R	MN	ADAM10_NOTCH1	adam10a_notch1a
7	Neu 1	L->R	MN	ADAM10_NOTCH2	adam10a_notch2
7	Neu 1	L->R	MN	ADAM10_TSPAN14	adam10a_tspan14
7	Neu 1	L->R	MN	ADAM17_IL6R	adam17a_il6r
7	Neu 1	L->R	MN	ADAM17_ITGA5	adam17a_itga5
7	Neu 1	L->R	MN	ADAM17_NOTCH1	adam17a_notch1a
7	Neu 1	L->R	MN	ADAM28_ITGA4	adam28_itga4
7	Neu 1	L->R	MN	ADM_GPR84	adma_gpr84
7	Neu 1	L->R	MN	AGTRAP_RACK1	agtrap_rack1
7	Neu 1	L->R	MN	APOE_ABCA1	apoeb_abca1a
7	Neu 1	L->R	MN	APOE_ABCA1	apoeb_abca1b
7	Neu 1	L->R	MN	ARF6_SMAP1	arf6a_smap1
7	Neu 1	L->R	MN	ARF6_SMAP1	arf6b_smap1
7	Neu 1	L->R	MN	CALM2_ABCA1	calm3a_abca1a
7	Neu 1	L->R	MN	CALM2_ABCA1	calm3a_abca1b
7	Neu 1	L->R	MN	CALM2_ABCA1	calm2a_abca1a
7	Neu 1	L->R	MN	CALM2_ABCA1	calm2a_abca1b
7	Neu 1	L->R	MN	CALR_ITGAV	calr_itgav
7	Neu 1	L->R	MN	CD99_CD81	cd99_cd81a
7	Neu 1	L->R	MN	CNTF_IL6R	m17_il6r
7	Neu 1	L->R	MN	CSF3_CSF3R	csf3b_csf3r
7	Neu 1	L->R	MN	CXCL9_CXCR3	BX323596.2_cxcr3.3
7	Neu 1	L->R	MN	F13A1_ITGA4	f13a1b_itga4
7	Neu 1	L->R	MN	FAM3C_LAMP1	fam3c_lamp1a
7	Neu 1	L->R	MN	GNAI2_ADCY7	gnai2b_adcy7
7	Neu 1	L->R	MN	GNAI2_C5AR1	gnai2b_CABZ01041494.1
7	Neu 1	L->R	MN	GNAI2_CXCR3	gnai2b_cxcr3.3
7	Neu 1	L->R	MN	GNAI2_ADCY7	gnai2a_adcy7
7	Neu 1	L->R	MN	GNAI2_C5AR1	gnai2a_CABZ01041494.1
7	Neu 1	L->R	MN	GNAI2_CXCR3	gnai2a_cxcr3.3
7	Neu 1	L->R	MN	GNAS_ADCY7	gnas_adcy7
7	Neu 1	L->R	MN	GRN_SORT1	grn1_sort1b
7	Neu 1	L->R	MN	GRN_TNFRSF1A	grn1_fas
7	Neu 1	L->R	MN	GRN_SORT1	grn2_sort1b
7	Neu 1	L->R	MN	GRN_TNFRSF1A	grn2_fas
7	Neu 1	L->R	MN	HBEGF_CD82	hbegfa_cd82a
7	Neu 1	L->R	MN	HBEGF_CD82	hbegfb_cd82a
7	Neu 1	L->R	MN	HMGB1_AGER	hmgb1a_si:ch211-79k12.1
7	Neu 1	L->R	MN	HMGB1_CXCR4	hmgb1a_cxcr4b
7	Neu 1	L->R	MN	ICAM3_ITGB2	si:ch211-66e2.3_itgb2
7	Neu 1	L->R	MN	ICAM3_ITGB2	si:ch73-208g10.1_itgb2
7	Neu 1	L->R	MN	ICAM3_ITGB2	icam3_itgb2
7	Neu 1	L->R	MN	IL16_CD4	il16_dicp3.3
7	Neu 1	L->R	MN	IL16_CD4	il16_dicp3.1
7	Neu 1	L->R	MN	IL16_CD4	il16_dicp2.1
7	Neu 1	L->R	MN	IL16_CD4	il16_dicp2.2
7	Neu 1	L->R	MN	INHBA_SMAD3	inhbaa_smad3a
7	Neu 1	L->R	MN	MFNG_NOTCH1	mfng_notch1a
7	Neu 1	L->R	MN	MFNG_NOTCH2	mfng_notch2
7	Neu 1	L->R	MN	MIF_CD74	mif_cd74a
7	Neu 1	L->R	MN	MIF_CD74	mif_cd74b
7	Neu 1	L->R	MN	MIF_CXCR4	mif_cxcr4b
7	Neu 1	L->R	MN	MMP9_ITGB2	mmp9_itgb2
7	Neu 1	L->R	MN	NUCB2_ERAP1	nucb2a_erap1b
7	Neu 1	L->R	MN	PROS1_MERTK	pros1_mertka
7	Neu 1	L->R	MN	PSAP_SORT1	psap_sort1b
7	Neu 1	L->R	MN	PSEN1_NOTCH1	psen1_notch1a
7	Neu 1	L->R	MN	PSEN1_NOTCH2	psen1_notch2
7	Neu 1	L->R	MN	RLN3_GPR84	rln3a_gpr84
7	Neu 1	L->R	MN	RPS19_C5AR1	rps19_CABZ01041494.1
7	Neu 1	L->R	MN	TGFB1_ACVRL1	tgfb1b_acvrl1
7	Neu 1	L->R	MN	TGFB1_CXCR4	tgfb1b_cxcr4b
7	Neu 1	L->R	MN	TGFB1_ITGAV	tgfb1b_itgav
7	Neu 1	L->R	MN	TGFB1_SMAD3	tgfb1b_smad3a
7	Neu 1	L->R	MN	TNF_NOTCH1	tnfb_notch1a
7	Neu 1	L->R	MN	TNF_TNFRSF1A	tnfb_fas
7	Neu 1	L->R	MN	TNF_TRADD	tnfb_tradd
7	Neu 1	L->R	MN	UBA52_NOTCH1	uba52_notch1a
7	Neu 1	L->R	MN	VEGFA_GPC1	vegfab_gpc1b
7	Neu 1	L->R	MN	VEGFA_ITGAV	vegfab_itgav
8	Neu 1	L->R	Mac 8	ADAM10_IL6R	adam10a_il6r
8	Neu 1	L->R	Mac 8	ADAM10_NOTCH2	adam10a_notch2
8	Neu 1	L->R	Mac 8	ADAM17_IL6R	adam17a_il6r
8	Neu 1	L->R	Mac 8	ADM_GPR84	adma_gpr84
8	Neu 1	L->R	Mac 8	AGTRAP_RACK1	agtrap_rack1
8	Neu 1	L->R	Mac 8	APOE_ABCA1	apoeb_abca1a
8	Neu 1	L->R	Mac 8	APOE_ABCA1	apoeb_abca1b
8	Neu 1	L->R	Mac 8	ARF6_SMAP1	arf6a_smap1
8	Neu 1	L->R	Mac 8	ARF6_SMAP1	arf6b_smap1
8	Neu 1	L->R	Mac 8	CALM2_ABCA1	calm3a_abca1a
8	Neu 1	L->R	Mac 8	CALM2_ABCA1	calm3a_abca1b
8	Neu 1	L->R	Mac 8	CALM2_ABCA1	calm2a_abca1a
8	Neu 1	L->R	Mac 8	CALM2_ABCA1	calm2a_abca1b
8	Neu 1	L->R	Mac 8	CD99_CD81	cd99_cd81a
8	Neu 1	L->R	Mac 8	CNTF_IL6R	m17_il6r
8	Neu 1	L->R	Mac 8	CSF3_CSF1R	csf3b_csf1rb
8	Neu 1	L->R	Mac 8	GNAI2_C5AR1	gnai2b_CABZ01041494.1
8	Neu 1	L->R	Mac 8	GNAI2_S1PR4	gnai2b_s1pr4
8	Neu 1	L->R	Mac 8	GNAI2_C5AR1	gnai2a_CABZ01041494.1
8	Neu 1	L->R	Mac 8	GNAI2_S1PR4	gnai2a_s1pr4
8	Neu 1	L->R	Mac 8	HBEGF_CD82	hbegfa_cd82a
8	Neu 1	L->R	Mac 8	HBEGF_CD82	hbegfb_cd82a
8	Neu 1	L->R	Mac 8	HMGB1_AGER	hmgb1a_si:ch211-79k12.1
8	Neu 1	L->R	Mac 8	HMGB1_CXCR4	hmgb1a_cxcr4a
8	Neu 1	L->R	Mac 8	HMGB1_CXCR4	hmgb1a_cxcr4b
8	Neu 1	L->R	Mac 8	ICAM3_ITGB2	si:ch211-66e2.3_itgb2
8	Neu 1	L->R	Mac 8	ICAM3_ITGB2	si:ch73-208g10.1_itgb2
8	Neu 1	L->R	Mac 8	ICAM3_ITGB2	icam3_itgb2
8	Neu 1	L->R	Mac 8	INHBA_BAMBI	inhbaa_bambia
8	Neu 1	L->R	Mac 8	MFNG_NOTCH2	mfng_notch2
8	Neu 1	L->R	Mac 8	MIF_CD74	mif_cd74a
8	Neu 1	L->R	Mac 8	MIF_CD74	mif_cd74b
8	Neu 1	L->R	Mac 8	MIF_CXCR4	mif_cxcr4a
8	Neu 1	L->R	Mac 8	MIF_CXCR4	mif_cxcr4b
8	Neu 1	L->R	Mac 8	MMP9_ITGB2	mmp9_itgb2
8	Neu 1	L->R	Mac 8	PSEN1_NOTCH2	psen1_notch2
8	Neu 1	L->R	Mac 8	RLN3_GPR84	rln3a_gpr84
8	Neu 1	L->R	Mac 8	RPS19_C5AR1	rps19_CABZ01041494.1
8	Neu 1	L->R	Mac 8	TGFB1_ACVRL1	tgfb1b_acvrl1
8	Neu 1	L->R	Mac 8	TGFB1_CXCR4	tgfb1b_cxcr4a
8	Neu 1	L->R	Mac 8	TGFB1_CXCR4	tgfb1b_cxcr4b
9	Neu 1	L->R	Mac 9	ACTR2_ADRB2	actr2a_adrb2a
9	Neu 1	L->R	Mac 9	ADAM10_NOTCH1	adam10a_notch1a
9	Neu 1	L->R	Mac 9	ADAM10_NOTCH2	adam10a_notch2
9	Neu 1	L->R	Mac 9	ADAM10_TSPAN14	adam10a_tspan14
9	Neu 1	L->R	Mac 9	ADAM17_ITGB1	adam17a_itgb1b.1
9	Neu 1	L->R	Mac 9	ADAM17_ITGB1	adam17a_itgb1a
9	Neu 1	L->R	Mac 9	ADAM17_NOTCH1	adam17a_notch1a
9	Neu 1	L->R	Mac 9	ADM_ADRB2	adma_adrb2a
9	Neu 1	L->R	Mac 9	ADM_ADRB3	adma_adrb3b
9	Neu 1	L->R	Mac 9	ADM_RAMP2	adma_ramp2
9	Neu 1	L->R	Mac 9	AGTRAP_RACK1	agtrap_rack1
9	Neu 1	L->R	Mac 9	APOE_ABCA1	apoeb_abca1a
9	Neu 1	L->R	Mac 9	APOE_ABCA1	apoeb_abca1b
9	Neu 1	L->R	Mac 9	APOE_SDC2	apoeb_sdc2
9	Neu 1	L->R	Mac 9	ARF6_SMAP1	arf6a_smap1
9	Neu 1	L->R	Mac 9	ARF6_SMAP1	arf6b_smap1
9	Neu 1	L->R	Mac 9	ARPC5_ADRB2	arpc5a_adrb2a
9	Neu 1	L->R	Mac 9	ARPC5_ADRB2	arpc5b_adrb2a
9	Neu 1	L->R	Mac 9	CALM2_ABCA1	calm3a_abca1a
9	Neu 1	L->R	Mac 9	CALM2_ABCA1	calm3a_abca1b
9	Neu 1	L->R	Mac 9	CALM2_INSR	calm3a_insra
9	Neu 1	L->R	Mac 9	CALM2_KCNQ5	calm3a_kcnq5b
9	Neu 1	L->R	Mac 9	CALM2_KCNQ5	calm3a_kcnq5a
9	Neu 1	L->R	Mac 9	CALM2_ABCA1	calm2a_abca1a
9	Neu 1	L->R	Mac 9	CALM2_ABCA1	calm2a_abca1b
9	Neu 1	L->R	Mac 9	CALM2_INSR	calm2a_insra
9	Neu 1	L->R	Mac 9	CALM2_KCNQ5	calm2a_kcnq5b
9	Neu 1	L->R	Mac 9	CALM2_KCNQ5	calm2a_kcnq5a
9	Neu 1	L->R	Mac 9	CALR_ITGAV	calr_itgav
9	Neu 1	L->R	Mac 9	CD99_CD81	cd99_cd81a
9	Neu 1	L->R	Mac 9	CSF3_CSF1R	csf3b_csf1rb
9	Neu 1	L->R	Mac 9	CSF3_CSF3R	csf3b_csf3r
9	Neu 1	L->R	Mac 9	F13A1_ITGB1	f13a1b_itgb1b.1
9	Neu 1	L->R	Mac 9	F13A1_ITGB1	f13a1b_itgb1a
9	Neu 1	L->R	Mac 9	GNAI2_S1PR4	gnai2b_s1pr4
9	Neu 1	L->R	Mac 9	GNAI2_S1PR4	gnai2a_s1pr4
9	Neu 1	L->R	Mac 9	GNAS_ADRB3	gnas_adrb3b
9	Neu 1	L->R	Mac 9	HBEGF_CD82	hbegfa_cd82a
9	Neu 1	L->R	Mac 9	HBEGF_CD82	hbegfa_cd82b
9	Neu 1	L->R	Mac 9	HBEGF_CD82	hbegfb_cd82a
9	Neu 1	L->R	Mac 9	HBEGF_CD82	hbegfb_cd82b
9	Neu 1	L->R	Mac 9	HMGB1_AGER	hmgb1a_si:ch211-79k12.1
9	Neu 1	L->R	Mac 9	HMGB1_CXCR4	hmgb1a_cxcr4a
9	Neu 1	L->R	Mac 9	HMGB1_CXCR4	hmgb1a_cxcr4b
9	Neu 1	L->R	Mac 9	HSPA8_ADRB2	hspa8_adrb2a
9	Neu 1	L->R	Mac 9	ICAM3_ITGB2	si:ch211-66e2.3_itgb2
9	Neu 1	L->R	Mac 9	ICAM3_ITGB2	si:ch73-208g10.1_itgb2
9	Neu 1	L->R	Mac 9	ICAM3_ITGB2	icam3_itgb2
9	Neu 1	L->R	Mac 9	IL16_CD4	il16_dicp3.3
9	Neu 1	L->R	Mac 9	IL1B_ADRB2	il1b_adrb2a
9	Neu 1	L->R	Mac 9	INHBA_ACVR2A	inhbaa_acvr2aa
9	Neu 1	L->R	Mac 9	INHBA_SMAD3	inhbaa_smad3a
9	Neu 1	L->R	Mac 9	LTF_TFRC	tfa_tfr1b
9	Neu 1	L->R	Mac 9	MFNG_NOTCH1	mfng_notch1a
9	Neu 1	L->R	Mac 9	MFNG_NOTCH2	mfng_notch2
9	Neu 1	L->R	Mac 9	MIF_CD74	mif_cd74a
9	Neu 1	L->R	Mac 9	MIF_CD74	mif_cd74b
9	Neu 1	L->R	Mac 9	MIF_CXCR4	mif_cxcr4a
9	Neu 1	L->R	Mac 9	MIF_CXCR4	mif_cxcr4b
9	Neu 1	L->R	Mac 9	MMP9_ITGB2	mmp9_itgb2
9	Neu 1	L->R	Mac 9	NAMPT_INSR	nampta_insra
9	Neu 1	L->R	Mac 9	NUCB2_ERAP1	nucb2a_erap1b
9	Neu 1	L->R	Mac 9	PIGF_FLT1	pigf_flt1
9	Neu 1	L->R	Mac 9	PSEN1_NOTCH1	psen1_notch1a
9	Neu 1	L->R	Mac 9	PSEN1_NOTCH2	psen1_notch2
9	Neu 1	L->R	Mac 9	RLN3_ADRB2	rln3a_adrb2a
9	Neu 1	L->R	Mac 9	RLN3_ADRB3	rln3a_adrb3b
9	Neu 1	L->R	Mac 9	RLN3_RAMP2	rln3a_ramp2
9	Neu 1	L->R	Mac 9	RTN4_NGFR	rtn4a_ngfrb
9	Neu 1	L->R	Mac 9	TGFB1_CXCR4	tgfb1b_cxcr4a
9	Neu 1	L->R	Mac 9	TGFB1_CXCR4	tgfb1b_cxcr4b
9	Neu 1	L->R	Mac 9	TGFB1_ITGAV	tgfb1b_itgav
9	Neu 1	L->R	Mac 9	TGFB1_ITGB1	tgfb1b_itgb1b.1
9	Neu 1	L->R	Mac 9	TGFB1_ITGB1	tgfb1b_itgb1a
9	Neu 1	L->R	Mac 9	TGFB1_SDC2	tgfb1b_sdc2
9	Neu 1	L->R	Mac 9	TGFB1_SMAD3	tgfb1b_smad3a
9	Neu 1	L->R	Mac 9	TIMP2_ITGB1	timp2b_itgb1b.1
9	Neu 1	L->R	Mac 9	TIMP2_ITGB1	timp2b_itgb1a
9	Neu 1	L->R	Mac 9	TNF_NOTCH1	tnfb_notch1a
9	Neu 1	L->R	Mac 9	TNF_TRADD	tnfb_tradd
9	Neu 1	L->R	Mac 9	TNFSF13B_TFRC	tnfsf13b_tfr1b
9	Neu 1	L->R	Mac 9	UBA52_NOTCH1	uba52_notch1a
9	Neu 1	L->R	Mac 9	VEGFA_FLT1	vegfab_flt1
9	Neu 1	L->R	Mac 9	VEGFA_ITGAV	vegfab_itgav
9	Neu 1	L->R	Mac 9	VEGFA_ITGB1	vegfab_itgb1b.1
9	Neu 1	L->R	Mac 9	VEGFA_ITGB1	vegfab_itgb1a
9	Neu 1	L->R	Mac 9	VEGFA_NRP2	vegfab_nrp2b
10	Neu 2	L->R	Mac 1	ACTR2_ADRB2	actr2a_adrb2a
10	Neu 2	L->R	Mac 1	ACTR2_ADRB2	actr2b_adrb2a
10	Neu 2	L->R	Mac 1	ADAM10_GPNMB	adam10a_gpnmb
10	Neu 2	L->R	Mac 1	ADAM10_IL6R	adam10a_il6r
10	Neu 2	L->R	Mac 1	ADAM10_NOTCH1	adam10a_notch1a
10	Neu 2	L->R	Mac 1	ADAM10_NOTCH2	adam10a_notch2
10	Neu 2	L->R	Mac 1	ADAM10_TSPAN14	adam10a_tspan14
10	Neu 2	L->R	Mac 1	ADAM17_IL6R	adam17a_il6r
10	Neu 2	L->R	Mac 1	ADAM17_ITGA5	adam17a_itga5
10	Neu 2	L->R	Mac 1	ADAM17_ITGB1	adam17a_itgb1b
10	Neu 2	L->R	Mac 1	ADAM17_NOTCH1	adam17a_notch1a
10	Neu 2	L->R	Mac 1	ADAM28_ITGA4	adam28_itga4
10	Neu 2	L->R	Mac 1	ADM_ADRB2	adma_adrb2a
10	Neu 2	L->R	Mac 1	ADM_GPR84	adma_gpr84
10	Neu 2	L->R	Mac 1	ADM_RAMP2	adma_ramp2
10	Neu 2	L->R	Mac 1	AGTRAP_RACK1	agtrap_rack1
10	Neu 2	L->R	Mac 1	ARF6_SMAP1	arf6a_smap1
10	Neu 2	L->R	Mac 1	ARF6_SMAP1	arf6b_smap1
10	Neu 2	L->R	Mac 1	ARPC5_ADRB2	arpc5a_adrb2a
10	Neu 2	L->R	Mac 1	ARPC5_ADRB2	arpc5b_adrb2a
10	Neu 2	L->R	Mac 1	CALM2_ABCA1	calm3a_abca1a
10	Neu 2	L->R	Mac 1	CALM2_ABCA1	calm3a_abca1b
10	Neu 2	L->R	Mac 1	CALM2_INSR	calm3a_insra
10	Neu 2	L->R	Mac 1	CALM2_ABCA1	calm2a_abca1a
10	Neu 2	L->R	Mac 1	CALM2_ABCA1	calm2a_abca1b
10	Neu 2	L->R	Mac 1	CALM2_INSR	calm2a_insra
10	Neu 2	L->R	Mac 1	CD99_CD81	cd99_cd81a
10	Neu 2	L->R	Mac 1	CNTF_IL6R	m17_il6r
10	Neu 2	L->R	Mac 1	CSF3_CSF1R	csf3a_csf1ra
10	Neu 2	L->R	Mac 1	CSF3_CSF3R	csf3a_csf3r
10	Neu 2	L->R	Mac 1	CSF3_CSF1R	csf3b_csf1ra
10	Neu 2	L->R	Mac 1	CSF3_CSF3R	csf3b_csf3r
10	Neu 2	L->R	Mac 1	CXCL9_CXCR3	BX323596.1_cxcr3.3
10	Neu 2	L->R	Mac 1	CXCL9_CXCR3	BX323596.2_cxcr3.3
10	Neu 2	L->R	Mac 1	F13A1_ITGA4	f13a1b_itga4
10	Neu 2	L->R	Mac 1	F13A1_ITGB1	f13a1b_itgb1b
10	Neu 2	L->R	Mac 1	FAM3C_LAMP1	fam3c_lamp1a
10	Neu 2	L->R	Mac 1	GNAI2_ADCY7	gnai2b_adcy7
10	Neu 2	L->R	Mac 1	GNAI2_C5AR1	gnai2b_CABZ01041494.1
10	Neu 2	L->R	Mac 1	GNAI2_CXCR3	gnai2b_cxcr3.3
10	Neu 2	L->R	Mac 1	GNAI2_P2RY12	gnai2b_p2ry12
10	Neu 2	L->R	Mac 1	GNAI2_ADCY7	gnai2a_adcy7
10	Neu 2	L->R	Mac 1	GNAI2_C5AR1	gnai2a_CABZ01041494.1
10	Neu 2	L->R	Mac 1	GNAI2_CXCR3	gnai2a_cxcr3.3
10	Neu 2	L->R	Mac 1	GNAI2_P2RY12	gnai2a_p2ry12
10	Neu 2	L->R	Mac 1	GNAS_ADCY7	gnas_adcy7
10	Neu 2	L->R	Mac 1	GPI_AMFR	gpia_amfra
10	Neu 2	L->R	Mac 1	GRN_SORT1	grn1_sort1b
10	Neu 2	L->R	Mac 1	GRN_TNFRSF1B	grn1_tnfrsf1b
10	Neu 2	L->R	Mac 1	GRN_SORT1	grn2_sort1b
10	Neu 2	L->R	Mac 1	GRN_TNFRSF1B	grn2_tnfrsf1b
10	Neu 2	L->R	Mac 1	HBEGF_CD82	hbegfa_cd82a
10	Neu 2	L->R	Mac 1	HBEGF_CD82	hbegfb_cd82a
10	Neu 2	L->R	Mac 1	HMGB1_AGER	hmgb1a_si:ch211-79k12.1
10	Neu 2	L->R	Mac 1	HMGB1_CXCR4	hmgb1a_cxcr4a
10	Neu 2	L->R	Mac 1	HMGB1_CXCR4	hmgb1a_cxcr4b
10	Neu 2	L->R	Mac 1	HRAS_INSR	hrasb_insra
10	Neu 2	L->R	Mac 1	HSP90AA1_LRP1	hsp90aa1.2_lrp1ab
10	Neu 2	L->R	Mac 1	HSP90B1_LRP1	hsp90b1_lrp1ab
10	Neu 2	L->R	Mac 1	HSPA8_ADRB2	hspa8_adrb2a
10	Neu 2	L->R	Mac 1	ICAM3_ITGB2	si:ch211-66e2.3_itgb2
10	Neu 2	L->R	Mac 1	ICAM3_ITGB2	si:ch73-208g10.1_itgb2
10	Neu 2	L->R	Mac 1	ICAM3_ITGB2	icam3_itgb2
10	Neu 2	L->R	Mac 1	IL16_CD4	il16_dicp3.3
10	Neu 2	L->R	Mac 1	IL16_CD4	il16_dicp3.1
10	Neu 2	L->R	Mac 1	IL16_CD4	il16_dicp2.1
10	Neu 2	L->R	Mac 1	IL1B_ADRB2	il1b_adrb2a
10	Neu 2	L->R	Mac 1	IL1B_IL1R1	il1b_CABZ01054965.1
10	Neu 2	L->R	Mac 1	INHBA_BAMBI	inhbaa_bambia
10	Neu 2	L->R	Mac 1	INHBA_SMAD3	inhbaa_smad3a
10	Neu 2	L->R	Mac 1	LTF_LRP1	tfa_lrp1ab
10	Neu 2	L->R	Mac 1	MFNG_NOTCH1	mfng_notch1a
10	Neu 2	L->R	Mac 1	MFNG_NOTCH2	mfng_notch2
10	Neu 2	L->R	Mac 1	MIF_CD74	mif_cd74a
10	Neu 2	L->R	Mac 1	MIF_CD74	mif_cd74b
10	Neu 2	L->R	Mac 1	MIF_CXCR4	mif_cxcr4a
10	Neu 2	L->R	Mac 1	MIF_CXCR4	mif_cxcr4b
10	Neu 2	L->R	Mac 1	MMP9_ITGB2	mmp9_itgb2
10	Neu 2	L->R	Mac 1	MMP9_LRP1	mmp9_lrp1ab
10	Neu 2	L->R	Mac 1	NAMPT_INSR	nampta_insra
10	Neu 2	L->R	Mac 1	NUCB2_ERAP1	nucb2a_erap1b
10	Neu 2	L->R	Mac 1	PROS1_MERTK	pros1_mertka
10	Neu 2	L->R	Mac 1	PSAP_LRP1	psap_lrp1ab
10	Neu 2	L->R	Mac 1	PSAP_SORT1	psap_sort1b
10	Neu 2	L->R	Mac 1	PSEN1_NOTCH1	psen1_notch1a
10	Neu 2	L->R	Mac 1	PSEN1_NOTCH2	psen1_notch2
10	Neu 2	L->R	Mac 1	RPS19_C5AR1	rps19_CABZ01041494.1
10	Neu 2	L->R	Mac 1	RTN4_NGFR	rtn4a_ngfrb
10	Neu 2	L->R	Mac 1	SERPINE2_LRP1	serpine2_lrp1ab
10	Neu 2	L->R	Mac 1	TGFB1_ACVRL1	tgfb1b_acvrl1
10	Neu 2	L->R	Mac 1	TGFB1_CXCR4	tgfb1b_cxcr4a
10	Neu 2	L->R	Mac 1	TGFB1_CXCR4	tgfb1b_cxcr4b
10	Neu 2	L->R	Mac 1	TGFB1_ITGAV	tgfb1b_itgav
10	Neu 2	L->R	Mac 1	TGFB1_ITGB1	tgfb1b_itgb1b
10	Neu 2	L->R	Mac 1	TGFB1_SMAD3	tgfb1b_smad3a
10	Neu 2	L->R	Mac 1	TIMP2_ITGB1	timp2b_itgb1b
10	Neu 2	L->R	Mac 1	TNF_NOTCH1	tnfa_notch1a
10	Neu 2	L->R	Mac 1	TNF_TNFRSF1B	tnfa_tnfrsf1b
10	Neu 2	L->R	Mac 1	TNF_TRADD	tnfa_tradd
10	Neu 2	L->R	Mac 1	TNF_NOTCH1	tnfb_notch1a
10	Neu 2	L->R	Mac 1	TNF_TNFRSF1B	tnfb_tnfrsf1b
10	Neu 2	L->R	Mac 1	TNF_TRADD	tnfb_tradd
10	Neu 2	L->R	Mac 1	UBA52_NOTCH1	uba52_notch1a
10	Neu 2	L->R	Mac 1	VEGFA_GPC1	vegfab_gpc1b
10	Neu 2	L->R	Mac 1	VEGFA_ITGAV	vegfab_itgav
10	Neu 2	L->R	Mac 1	VEGFA_ITGB1	vegfab_itgb1b
10	Neu 2	L->R	Mac 1	VEGFA_NRP1	vegfab_nrp1a
11	Neu 2	L->R	Mac 2	ACTR2_ADRB2	actr2a_adrb2a
11	Neu 2	L->R	Mac 2	ACTR2_ADRB2	actr2b_adrb2a
11	Neu 2	L->R	Mac 2	ADAM10_GPNMB	adam10a_gpnmb
11	Neu 2	L->R	Mac 2	ADAM10_IL6R	adam10a_il6r
11	Neu 2	L->R	Mac 2	ADAM10_NOTCH1	adam10a_notch1a
11	Neu 2	L->R	Mac 2	ADAM10_NOTCH2	adam10a_notch2
11	Neu 2	L->R	Mac 2	ADAM10_TSPAN14	adam10a_tspan14
11	Neu 2	L->R	Mac 2	ADAM17_IL6R	adam17a_il6r
11	Neu 2	L->R	Mac 2	ADAM17_ITGA5	adam17a_itga5
11	Neu 2	L->R	Mac 2	ADAM17_NOTCH1	adam17a_notch1a
11	Neu 2	L->R	Mac 2	ADAM28_ITGA4	adam28_itga4
11	Neu 2	L->R	Mac 2	ADM_ADRB2	adma_adrb2a
11	Neu 2	L->R	Mac 2	ADM_GPR84	adma_gpr84
11	Neu 2	L->R	Mac 2	AGTRAP_RACK1	agtrap_rack1
11	Neu 2	L->R	Mac 2	ARF6_SMAP1	arf6a_smap1
11	Neu 2	L->R	Mac 2	ARF6_SMAP1	arf6b_smap1
11	Neu 2	L->R	Mac 2	ARPC5_ADRB2	arpc5a_adrb2a
11	Neu 2	L->R	Mac 2	ARPC5_ADRB2	arpc5b_adrb2a
11	Neu 2	L->R	Mac 2	CALM2_ABCA1	calm3a_abca1a
11	Neu 2	L->R	Mac 2	CALM2_ABCA1	calm3a_abca1b
11	Neu 2	L->R	Mac 2	CALM2_KCNQ5	calm3a_kcnq5b
11	Neu 2	L->R	Mac 2	CALM2_ABCA1	calm2a_abca1a
11	Neu 2	L->R	Mac 2	CALM2_ABCA1	calm2a_abca1b
11	Neu 2	L->R	Mac 2	CALM2_KCNQ5	calm2a_kcnq5b
11	Neu 2	L->R	Mac 2	CD99_CD81	cd99_cd81a
11	Neu 2	L->R	Mac 2	CNTF_IL6R	m17_il6r
11	Neu 2	L->R	Mac 2	CSF3_CSF1R	csf3a_csf1ra
11	Neu 2	L->R	Mac 2	CSF3_CSF1R	csf3a_csf1rb
11	Neu 2	L->R	Mac 2	CSF3_CSF1R	csf3b_csf1ra
11	Neu 2	L->R	Mac 2	CSF3_CSF1R	csf3b_csf1rb
11	Neu 2	L->R	Mac 2	CXCL9_CXCR3	BX323596.1_cxcr3.3
11	Neu 2	L->R	Mac 2	CXCL9_CXCR3	BX323596.2_cxcr3.3
11	Neu 2	L->R	Mac 2	F13A1_ITGA4	f13a1b_itga4
11	Neu 2	L->R	Mac 2	GNAI2_ADCY7	gnai2b_adcy7
11	Neu 2	L->R	Mac 2	GNAI2_C5AR1	gnai2b_CABZ01041494.1
11	Neu 2	L->R	Mac 2	GNAI2_CXCR3	gnai2b_cxcr3.3
11	Neu 2	L->R	Mac 2	GNAI2_S1PR4	gnai2b_s1pr4
11	Neu 2	L->R	Mac 2	GNAI2_ADCY7	gnai2a_adcy7
11	Neu 2	L->R	Mac 2	GNAI2_C5AR1	gnai2a_CABZ01041494.1
11	Neu 2	L->R	Mac 2	GNAI2_CXCR3	gnai2a_cxcr3.3
11	Neu 2	L->R	Mac 2	GNAI2_S1PR4	gnai2a_s1pr4
11	Neu 2	L->R	Mac 2	GNAS_ADCY7	gnas_adcy7
11	Neu 2	L->R	Mac 2	GRN_SORT1	grn1_sort1b
11	Neu 2	L->R	Mac 2	GRN_SORT1	grn2_sort1b
11	Neu 2	L->R	Mac 2	HBEGF_CD82	hbegfa_cd82b
11	Neu 2	L->R	Mac 2	HBEGF_CD82	hbegfb_cd82b
11	Neu 2	L->R	Mac 2	HMGB1_AGER	hmgb1a_si:ch211-79k12.1
11	Neu 2	L->R	Mac 2	HMGB1_CXCR4	hmgb1a_cxcr4a
11	Neu 2	L->R	Mac 2	HMGB1_CXCR4	hmgb1a_cxcr4b
11	Neu 2	L->R	Mac 2	HSP90AA1_LRP1	hsp90aa1.2_lrp1ab
11	Neu 2	L->R	Mac 2	HSP90B1_LRP1	hsp90b1_lrp1ab
11	Neu 2	L->R	Mac 2	HSPA8_ADRB2	hspa8_adrb2a
11	Neu 2	L->R	Mac 2	ICAM3_ITGB2	si:ch211-66e2.3_itgb2
11	Neu 2	L->R	Mac 2	ICAM3_ITGB2	si:ch73-208g10.1_itgb2
11	Neu 2	L->R	Mac 2	ICAM3_ITGB2	icam3_itgb2
11	Neu 2	L->R	Mac 2	IL16_CD4	il16_dicp2.1
11	Neu 2	L->R	Mac 2	IL1B_ADRB2	il1b_adrb2a
11	Neu 2	L->R	Mac 2	IL1B_IL1R1	il1b_zmp:0000000936
11	Neu 2	L->R	Mac 2	INHBA_SMAD3	inhbaa_smad3a
11	Neu 2	L->R	Mac 2	LTF_LRP1	tfa_lrp1ab
11	Neu 2	L->R	Mac 2	MFNG_NOTCH1	mfng_notch1a
11	Neu 2	L->R	Mac 2	MFNG_NOTCH2	mfng_notch2
11	Neu 2	L->R	Mac 2	MIF_CD74	mif_cd74a
11	Neu 2	L->R	Mac 2	MIF_CD74	mif_cd74b
11	Neu 2	L->R	Mac 2	MIF_CXCR4	mif_cxcr4a
11	Neu 2	L->R	Mac 2	MIF_CXCR4	mif_cxcr4b
11	Neu 2	L->R	Mac 2	MMP9_ITGB2	mmp9_itgb2
11	Neu 2	L->R	Mac 2	MMP9_LRP1	mmp9_lrp1ab
11	Neu 2	L->R	Mac 2	NUCB2_ERAP1	nucb2a_erap1b
11	Neu 2	L->R	Mac 2	PROS1_MERTK	pros1_mertka
11	Neu 2	L->R	Mac 2	PSAP_LRP1	psap_lrp1ab
11	Neu 2	L->R	Mac 2	PSAP_SORT1	psap_sort1b
11	Neu 2	L->R	Mac 2	PSEN1_NOTCH1	psen1_notch1a
11	Neu 2	L->R	Mac 2	PSEN1_NOTCH2	psen1_notch2
11	Neu 2	L->R	Mac 2	RPS19_C5AR1	rps19_CABZ01041494.1
11	Neu 2	L->R	Mac 2	SERPINE2_LRP1	serpine2_lrp1ab
11	Neu 2	L->R	Mac 2	TGFB1_ACVRL1	tgfb1b_acvrl1
11	Neu 2	L->R	Mac 2	TGFB1_CXCR4	tgfb1b_cxcr4a
11	Neu 2	L->R	Mac 2	TGFB1_CXCR4	tgfb1b_cxcr4b
11	Neu 2	L->R	Mac 2	TGFB1_SMAD3	tgfb1b_smad3a
11	Neu 2	L->R	Mac 2	TNF_NOTCH1	tnfa_notch1a
11	Neu 2	L->R	Mac 2	TNF_TRADD	tnfa_tradd
11	Neu 2	L->R	Mac 2	TNF_NOTCH1	tnfb_notch1a
11	Neu 2	L->R	Mac 2	TNF_TRADD	tnfb_tradd
11	Neu 2	L->R	Mac 2	UBA52_NOTCH1	uba52_notch1a
11	Neu 2	L->R	Mac 2	VEGFA_GPC1	vegfab_gpc1b
12	Neu 2	L->R	Mac 3	ACTR2_ADRB2	actr2a_adrb2a
12	Neu 2	L->R	Mac 3	ACTR2_ADRB2	actr2b_adrb2a
12	Neu 2	L->R	Mac 3	ADAM10_IL6R	adam10a_il6r
12	Neu 2	L->R	Mac 3	ADAM10_NOTCH1	adam10a_notch1a
12	Neu 2	L->R	Mac 3	ADAM10_NOTCH2	adam10a_notch2
12	Neu 2	L->R	Mac 3	ADAM10_TSPAN14	adam10a_tspan14
12	Neu 2	L->R	Mac 3	ADAM17_IL6R	adam17a_il6r
12	Neu 2	L->R	Mac 3	ADAM17_ITGA5	adam17a_itga5
12	Neu 2	L->R	Mac 3	ADAM17_ITGB1	adam17a_itgb1b
12	Neu 2	L->R	Mac 3	ADAM17_NOTCH1	adam17a_notch1a
12	Neu 2	L->R	Mac 3	ADAM28_ITGA4	adam28_itga4
12	Neu 2	L->R	Mac 3	ADM_ADRB2	adma_adrb2a
12	Neu 2	L->R	Mac 3	ADM_GPR84	adma_gpr84
12	Neu 2	L->R	Mac 3	AGTRAP_RACK1	agtrap_rack1
12	Neu 2	L->R	Mac 3	ARF6_SMAP1	arf6a_smap1
12	Neu 2	L->R	Mac 3	ARF6_SMAP1	arf6b_smap1
12	Neu 2	L->R	Mac 3	ARPC5_ADRB2	arpc5a_adrb2a
12	Neu 2	L->R	Mac 3	ARPC5_ADRB2	arpc5b_adrb2a
12	Neu 2	L->R	Mac 3	CALM2_ABCA1	calm3a_abca1a
12	Neu 2	L->R	Mac 3	CALM2_ABCA1	calm3a_abca1b
12	Neu 2	L->R	Mac 3	CALM2_INSR	calm3a_insra
12	Neu 2	L->R	Mac 3	CALM2_ABCA1	calm2a_abca1a
12	Neu 2	L->R	Mac 3	CALM2_ABCA1	calm2a_abca1b
12	Neu 2	L->R	Mac 3	CALM2_INSR	calm2a_insra
12	Neu 2	L->R	Mac 3	CD99_CD81	cd99_cd81a
12	Neu 2	L->R	Mac 3	CNTF_IL6R	m17_il6r
12	Neu 2	L->R	Mac 3	CSF3_CSF1R	csf3a_csf1ra
12	Neu 2	L->R	Mac 3	CSF3_CSF1R	csf3a_csf1rb
12	Neu 2	L->R	Mac 3	CSF3_CSF3R	csf3a_csf3r
12	Neu 2	L->R	Mac 3	CSF3_CSF1R	csf3b_csf1ra
12	Neu 2	L->R	Mac 3	CSF3_CSF1R	csf3b_csf1rb
12	Neu 2	L->R	Mac 3	CSF3_CSF3R	csf3b_csf3r
12	Neu 2	L->R	Mac 3	CXCL9_CXCR3	BX323596.1_cxcr3.3
12	Neu 2	L->R	Mac 3	CXCL9_CXCR3	BX323596.2_cxcr3.3
12	Neu 2	L->R	Mac 3	F13A1_ITGA4	f13a1b_itga4
12	Neu 2	L->R	Mac 3	F13A1_ITGB1	f13a1b_itgb1b
12	Neu 2	L->R	Mac 3	GNAI2_ADCY7	gnai2b_adcy7
12	Neu 2	L->R	Mac 3	GNAI2_C5AR1	gnai2b_CABZ01041494.1
12	Neu 2	L->R	Mac 3	GNAI2_CXCR3	gnai2b_cxcr3.3
12	Neu 2	L->R	Mac 3	GNAI2_P2RY12	gnai2b_p2ry12
12	Neu 2	L->R	Mac 3	GNAI2_ADCY7	gnai2a_adcy7
12	Neu 2	L->R	Mac 3	GNAI2_C5AR1	gnai2a_CABZ01041494.1
12	Neu 2	L->R	Mac 3	GNAI2_CXCR3	gnai2a_cxcr3.3
12	Neu 2	L->R	Mac 3	GNAI2_P2RY12	gnai2a_p2ry12
12	Neu 2	L->R	Mac 3	GNAS_ADCY7	gnas_adcy7
12	Neu 2	L->R	Mac 3	GPI_AMFR	gpia_amfra
12	Neu 2	L->R	Mac 3	GRN_SORT1	grn1_sort1b
12	Neu 2	L->R	Mac 3	GRN_TNFRSF1B	grn1_tnfrsf1b
12	Neu 2	L->R	Mac 3	GRN_SORT1	grn2_sort1b
12	Neu 2	L->R	Mac 3	GRN_TNFRSF1B	grn2_tnfrsf1b
12	Neu 2	L->R	Mac 3	HBEGF_CD82	hbegfa_cd82a
12	Neu 2	L->R	Mac 3	HBEGF_CD82	hbegfb_cd82a
12	Neu 2	L->R	Mac 3	HMGB1_AGER	hmgb1a_si:ch211-79k12.1
12	Neu 2	L->R	Mac 3	HMGB1_CXCR4	hmgb1a_cxcr4a
12	Neu 2	L->R	Mac 3	HMGB1_CXCR4	hmgb1a_cxcr4b
12	Neu 2	L->R	Mac 3	HRAS_INSR	hrasb_insra
12	Neu 2	L->R	Mac 3	HRAS_SDC2	hrasb_sdc2
12	Neu 2	L->R	Mac 3	HSP90AA1_LRP1	hsp90aa1.2_lrp1ab
12	Neu 2	L->R	Mac 3	HSP90B1_LRP1	hsp90b1_lrp1ab
12	Neu 2	L->R	Mac 3	HSPA8_ADRB2	hspa8_adrb2a
12	Neu 2	L->R	Mac 3	ICAM3_ITGB2	si:ch211-66e2.3_itgb2
12	Neu 2	L->R	Mac 3	ICAM3_ITGB2	si:ch73-208g10.1_itgb2
12	Neu 2	L->R	Mac 3	ICAM3_ITGB2	icam3_itgb2
12	Neu 2	L->R	Mac 3	IL16_CD4	il16_cd4-1
12	Neu 2	L->R	Mac 3	IL16_CD4	il16_dicp3.1
12	Neu 2	L->R	Mac 3	IL16_CD4	il16_dicp2.1
12	Neu 2	L->R	Mac 3	IL1B_ADRB2	il1b_adrb2a
12	Neu 2	L->R	Mac 3	IL1B_IL1R1	il1b_CABZ01054965.1
12	Neu 2	L->R	Mac 3	IL1B_IL1R1	il1b_zmp:0000000936
12	Neu 2	L->R	Mac 3	INHBA_SMAD3	inhbaa_smad3a
12	Neu 2	L->R	Mac 3	IRAK4_TLR6	irak4_tlr1
12	Neu 2	L->R	Mac 3	LTF_LRP1	tfa_lrp1ab
12	Neu 2	L->R	Mac 3	MFNG_NOTCH1	mfng_notch1a
12	Neu 2	L->R	Mac 3	MFNG_NOTCH2	mfng_notch2
12	Neu 2	L->R	Mac 3	MIF_CD74	mif_cd74a
12	Neu 2	L->R	Mac 3	MIF_CD74	mif_cd74b
12	Neu 2	L->R	Mac 3	MIF_CXCR4	mif_cxcr4a
12	Neu 2	L->R	Mac 3	MIF_CXCR4	mif_cxcr4b
12	Neu 2	L->R	Mac 3	MMP9_ITGB2	mmp9_itgb2
12	Neu 2	L->R	Mac 3	MMP9_LRP1	mmp9_lrp1ab
12	Neu 2	L->R	Mac 3	NAMPT_INSR	nampta_insra
12	Neu 2	L->R	Mac 3	NUCB2_ERAP1	nucb2a_erap1b
12	Neu 2	L->R	Mac 3	PROS1_MERTK	pros1_mertka
12	Neu 2	L->R	Mac 3	PSAP_LRP1	psap_lrp1ab
12	Neu 2	L->R	Mac 3	PSAP_SORT1	psap_sort1b
12	Neu 2	L->R	Mac 3	PSEN1_NOTCH1	psen1_notch1a
12	Neu 2	L->R	Mac 3	PSEN1_NOTCH2	psen1_notch2
12	Neu 2	L->R	Mac 3	RPS19_C5AR1	rps19_CABZ01041494.1
12	Neu 2	L->R	Mac 3	RTN4_NGFR	rtn4a_ngfrb
12	Neu 2	L->R	Mac 3	SERPINE2_LRP1	serpine2_lrp1ab
12	Neu 2	L->R	Mac 3	TGFB1_ACVRL1	tgfb1b_acvrl1
12	Neu 2	L->R	Mac 3	TGFB1_CXCR4	tgfb1b_cxcr4a
12	Neu 2	L->R	Mac 3	TGFB1_CXCR4	tgfb1b_cxcr4b
12	Neu 2	L->R	Mac 3	TGFB1_ITGAV	tgfb1b_itgav
12	Neu 2	L->R	Mac 3	TGFB1_ITGB1	tgfb1b_itgb1b
12	Neu 2	L->R	Mac 3	TGFB1_ITGB5	tgfb1b_itgb5
12	Neu 2	L->R	Mac 3	TGFB1_SDC2	tgfb1b_sdc2
12	Neu 2	L->R	Mac 3	TGFB1_SMAD3	tgfb1b_smad3a
12	Neu 2	L->R	Mac 3	TIMP2_ITGB1	timp2b_itgb1b
12	Neu 2	L->R	Mac 3	TLN1_ITGB5	tln1_itgb5
12	Neu 2	L->R	Mac 3	TNF_NOTCH1	tnfa_notch1a
12	Neu 2	L->R	Mac 3	TNF_TNFRSF1B	tnfa_tnfrsf1b
12	Neu 2	L->R	Mac 3	TNF_TNFRSF21	tnfa_tnfrsf21
12	Neu 2	L->R	Mac 3	TNF_TRADD	tnfa_tradd
12	Neu 2	L->R	Mac 3	TNF_NOTCH1	tnfb_notch1a
12	Neu 2	L->R	Mac 3	TNF_TNFRSF1B	tnfb_tnfrsf1b
12	Neu 2	L->R	Mac 3	TNF_TNFRSF21	tnfb_tnfrsf21
12	Neu 2	L->R	Mac 3	TNF_TRADD	tnfb_tradd
12	Neu 2	L->R	Mac 3	UBA52_NOTCH1	uba52_notch1a
12	Neu 2	L->R	Mac 3	VEGFA_GPC1	vegfab_gpc1b
12	Neu 2	L->R	Mac 3	VEGFA_ITGAV	vegfab_itgav
12	Neu 2	L->R	Mac 3	VEGFA_ITGB1	vegfab_itgb1b
12	Neu 2	L->R	Mac 3	VEGFA_NRP1	vegfab_nrp1a
12	Neu 2	L->R	Mac 3	VEGFA_NRP2	vegfab_nrp2b
13	Neu 2	L->R	Mac 4	ACTR2_ADRB2	actr2a_adrb2a
13	Neu 2	L->R	Mac 4	ACTR2_ADRB2	actr2b_adrb2a
13	Neu 2	L->R	Mac 4	ADAM10_IL6R	adam10a_il6r
13	Neu 2	L->R	Mac 4	ADAM10_NOTCH1	adam10a_notch1a
13	Neu 2	L->R	Mac 4	ADAM10_NOTCH2	adam10a_notch2
13	Neu 2	L->R	Mac 4	ADAM10_TSPAN14	adam10a_tspan14
13	Neu 2	L->R	Mac 4	ADAM17_IL6R	adam17a_il6r
13	Neu 2	L->R	Mac 4	ADAM17_ITGA5	adam17a_itga5
13	Neu 2	L->R	Mac 4	ADAM17_NOTCH1	adam17a_notch1a
13	Neu 2	L->R	Mac 4	ADAM28_ITGA4	adam28_itga4
13	Neu 2	L->R	Mac 4	ADM_ADRB2	adma_adrb2a
13	Neu 2	L->R	Mac 4	ADM_GPR84	adma_gpr84
13	Neu 2	L->R	Mac 4	AGTRAP_RACK1	agtrap_rack1
13	Neu 2	L->R	Mac 4	ARF6_SMAP1	arf6a_smap1
13	Neu 2	L->R	Mac 4	ARF6_SMAP1	arf6b_smap1
13	Neu 2	L->R	Mac 4	ARPC5_ADRB2	arpc5a_adrb2a
13	Neu 2	L->R	Mac 4	ARPC5_ADRB2	arpc5b_adrb2a
13	Neu 2	L->R	Mac 4	CALM2_ABCA1	calm3a_abca1a
13	Neu 2	L->R	Mac 4	CALM2_ABCA1	calm3a_abca1b
13	Neu 2	L->R	Mac 4	CALM2_ABCA1	calm2a_abca1a
13	Neu 2	L->R	Mac 4	CALM2_ABCA1	calm2a_abca1b
13	Neu 2	L->R	Mac 4	CD99_CD81	cd99_cd81a
13	Neu 2	L->R	Mac 4	CNTF_IL6R	m17_il6r
13	Neu 2	L->R	Mac 4	CSF3_CSF1R	csf3a_csf1ra
13	Neu 2	L->R	Mac 4	CSF3_CSF3R	csf3a_csf3r
13	Neu 2	L->R	Mac 4	CSF3_CSF1R	csf3b_csf1ra
13	Neu 2	L->R	Mac 4	CSF3_CSF3R	csf3b_csf3r
13	Neu 2	L->R	Mac 4	CXCL9_CXCR3	BX323596.1_cxcr3.3
13	Neu 2	L->R	Mac 4	CXCL9_CXCR3	BX323596.2_cxcr3.3
13	Neu 2	L->R	Mac 4	F13A1_ITGA4	f13a1b_itga4
13	Neu 2	L->R	Mac 4	GNAI2_ADCY7	gnai2b_adcy7
13	Neu 2	L->R	Mac 4	GNAI2_C5AR1	gnai2b_CABZ01041494.1
13	Neu 2	L->R	Mac 4	GNAI2_CXCR3	gnai2b_cxcr3.3
13	Neu 2	L->R	Mac 4	GNAI2_S1PR4	gnai2b_s1pr4
13	Neu 2	L->R	Mac 4	GNAI2_ADCY7	gnai2a_adcy7
13	Neu 2	L->R	Mac 4	GNAI2_C5AR1	gnai2a_CABZ01041494.1
13	Neu 2	L->R	Mac 4	GNAI2_CXCR3	gnai2a_cxcr3.3
13	Neu 2	L->R	Mac 4	GNAI2_S1PR4	gnai2a_s1pr4
13	Neu 2	L->R	Mac 4	GNAS_ADCY7	gnas_adcy7
13	Neu 2	L->R	Mac 4	GPI_AMFR	gpia_amfra
13	Neu 2	L->R	Mac 4	GRN_SORT1	grn1_sort1b
13	Neu 2	L->R	Mac 4	GRN_TNFRSF1B	grn1_tnfrsf1b
13	Neu 2	L->R	Mac 4	GRN_SORT1	grn2_sort1b
13	Neu 2	L->R	Mac 4	GRN_TNFRSF1B	grn2_tnfrsf1b
13	Neu 2	L->R	Mac 4	HBEGF_CD82	hbegfa_cd82a
13	Neu 2	L->R	Mac 4	HBEGF_CD82	hbegfb_cd82a
13	Neu 2	L->R	Mac 4	HMGB1_AGER	hmgb1a_si:ch211-79k12.1
13	Neu 2	L->R	Mac 4	HMGB1_CXCR4	hmgb1a_cxcr4a
13	Neu 2	L->R	Mac 4	HMGB1_CXCR4	hmgb1a_cxcr4b
13	Neu 2	L->R	Mac 4	HSPA8_ADRB2	hspa8_adrb2a
13	Neu 2	L->R	Mac 4	ICAM3_ITGB2	si:ch211-66e2.3_itgb2
13	Neu 2	L->R	Mac 4	ICAM3_ITGB2	si:ch73-208g10.1_itgb2
13	Neu 2	L->R	Mac 4	ICAM3_ITGB2	icam3_itgb2
13	Neu 2	L->R	Mac 4	IL16_CD4	il16_dicp3.1
13	Neu 2	L->R	Mac 4	IL16_CD4	il16_dicp2.1
13	Neu 2	L->R	Mac 4	IL16_CD4	il16_dicp2.2
13	Neu 2	L->R	Mac 4	IL1B_ADRB2	il1b_adrb2a
13	Neu 2	L->R	Mac 4	IL1B_IL1R1	il1b_CABZ01054965.1
13	Neu 2	L->R	Mac 4	INHBA_SMAD3	inhbaa_smad3a
13	Neu 2	L->R	Mac 4	MFNG_NOTCH1	mfng_notch1a
13	Neu 2	L->R	Mac 4	MFNG_NOTCH2	mfng_notch2
13	Neu 2	L->R	Mac 4	MIF_CD74	mif_cd74a
13	Neu 2	L->R	Mac 4	MIF_CD74	mif_cd74b
13	Neu 2	L->R	Mac 4	MIF_CXCR4	mif_cxcr4a
13	Neu 2	L->R	Mac 4	MIF_CXCR4	mif_cxcr4b
13	Neu 2	L->R	Mac 4	MMP9_ITGB2	mmp9_itgb2
13	Neu 2	L->R	Mac 4	NUCB2_ERAP1	nucb2a_erap1b
13	Neu 2	L->R	Mac 4	PROS1_MERTK	pros1_mertka
13	Neu 2	L->R	Mac 4	PSAP_SORT1	psap_sort1b
13	Neu 2	L->R	Mac 4	PSEN1_NOTCH1	psen1_notch1a
13	Neu 2	L->R	Mac 4	PSEN1_NOTCH2	psen1_notch2
13	Neu 2	L->R	Mac 4	RPS19_C5AR1	rps19_CABZ01041494.1
13	Neu 2	L->R	Mac 4	TGFB1_ACVRL1	tgfb1b_acvrl1
13	Neu 2	L->R	Mac 4	TGFB1_CXCR4	tgfb1b_cxcr4a
13	Neu 2	L->R	Mac 4	TGFB1_CXCR4	tgfb1b_cxcr4b
13	Neu 2	L->R	Mac 4	TGFB1_ITGAV	tgfb1b_itgav
13	Neu 2	L->R	Mac 4	TGFB1_SMAD3	tgfb1b_smad3a
13	Neu 2	L->R	Mac 4	TNF_NOTCH1	tnfa_notch1a
13	Neu 2	L->R	Mac 4	TNF_TNFRSF1B	tnfa_tnfrsf1b
13	Neu 2	L->R	Mac 4	TNF_TRADD	tnfa_tradd
13	Neu 2	L->R	Mac 4	TNF_NOTCH1	tnfb_notch1a
13	Neu 2	L->R	Mac 4	TNF_TNFRSF1B	tnfb_tnfrsf1b
13	Neu 2	L->R	Mac 4	TNF_TRADD	tnfb_tradd
13	Neu 2	L->R	Mac 4	UBA52_NOTCH1	uba52_notch1a
13	Neu 2	L->R	Mac 4	VEGFA_GPC1	vegfab_gpc1b
13	Neu 2	L->R	Mac 4	VEGFA_ITGAV	vegfab_itgav
13	Neu 2	L->R	Mac 4	VEGFA_NRP1	vegfab_nrp1a
14	Neu 2	L->R	Mac 5	ADAM10_IL6R	adam10a_il6r
14	Neu 2	L->R	Mac 5	ADAM10_NOTCH2	adam10a_notch2
14	Neu 2	L->R	Mac 5	ADAM10_TSPAN14	adam10a_tspan14
14	Neu 2	L->R	Mac 5	ADAM17_IL6R	adam17a_il6r
14	Neu 2	L->R	Mac 5	ADAM17_ITGA5	adam17a_itga5
14	Neu 2	L->R	Mac 5	ADM_GPR84	adma_gpr84
14	Neu 2	L->R	Mac 5	AGTRAP_RACK1	agtrap_rack1
14	Neu 2	L->R	Mac 5	ARF6_SMAP1	arf6a_smap1
14	Neu 2	L->R	Mac 5	ARF6_SMAP1	arf6b_smap1
14	Neu 2	L->R	Mac 5	CALM2_ABCA1	calm3a_abca1a
14	Neu 2	L->R	Mac 5	CALM2_ABCA1	calm3a_abca1b
14	Neu 2	L->R	Mac 5	CALM2_ABCA1	calm2a_abca1a
14	Neu 2	L->R	Mac 5	CALM2_ABCA1	calm2a_abca1b
14	Neu 2	L->R	Mac 5	CD99_CD81	cd99_cd81a
14	Neu 2	L->R	Mac 5	CNTF_IL6R	m17_il6r
14	Neu 2	L->R	Mac 5	CSF3_CSF1R	csf3a_csf1ra
14	Neu 2	L->R	Mac 5	CSF3_CSF1R	csf3a_csf1rb
14	Neu 2	L->R	Mac 5	CSF3_CSF3R	csf3a_csf3r
14	Neu 2	L->R	Mac 5	CSF3_CSF1R	csf3b_csf1ra
14	Neu 2	L->R	Mac 5	CSF3_CSF1R	csf3b_csf1rb
14	Neu 2	L->R	Mac 5	CSF3_CSF3R	csf3b_csf3r
14	Neu 2	L->R	Mac 5	CXCL9_CXCR3	BX323596.1_cxcr3.3
14	Neu 2	L->R	Mac 5	CXCL9_CXCR3	BX323596.2_cxcr3.3
14	Neu 2	L->R	Mac 5	GNAI2_ADCY7	gnai2b_adcy7
14	Neu 2	L->R	Mac 5	GNAI2_C5AR1	gnai2b_CABZ01041494.1
14	Neu 2	L->R	Mac 5	GNAI2_CXCR3	gnai2b_cxcr3.3
14	Neu 2	L->R	Mac 5	GNAI2_ADCY7	gnai2a_adcy7
14	Neu 2	L->R	Mac 5	GNAI2_C5AR1	gnai2a_CABZ01041494.1
14	Neu 2	L->R	Mac 5	GNAI2_CXCR3	gnai2a_cxcr3.3
14	Neu 2	L->R	Mac 5	GNAS_ADCY7	gnas_adcy7
14	Neu 2	L->R	Mac 5	HBEGF_CD82	hbegfa_cd82a
14	Neu 2	L->R	Mac 5	HBEGF_CD82	hbegfb_cd82a
14	Neu 2	L->R	Mac 5	HMGB1_AGER	hmgb1a_si:ch211-79k12.1
14	Neu 2	L->R	Mac 5	HMGB1_CXCR4	hmgb1a_cxcr4b
14	Neu 2	L->R	Mac 5	ICAM3_ITGB2	si:ch211-66e2.3_itgb2
14	Neu 2	L->R	Mac 5	ICAM3_ITGB2	si:ch73-208g10.1_itgb2
14	Neu 2	L->R	Mac 5	ICAM3_ITGB2	icam3_itgb2
14	Neu 2	L->R	Mac 5	IL16_CD4	il16_cd4-1
14	Neu 2	L->R	Mac 5	IL16_CD4	il16_dicp2.1
14	Neu 2	L->R	Mac 5	INHBA_SMAD3	inhbaa_smad3a
14	Neu 2	L->R	Mac 5	MFNG_NOTCH2	mfng_notch2
14	Neu 2	L->R	Mac 5	MIF_CD74	mif_cd74a
14	Neu 2	L->R	Mac 5	MIF_CD74	mif_cd74b
14	Neu 2	L->R	Mac 5	MIF_CXCR4	mif_cxcr4b
14	Neu 2	L->R	Mac 5	MMP9_ITGB2	mmp9_itgb2
14	Neu 2	L->R	Mac 5	NUCB2_ERAP1	nucb2a_erap1b
14	Neu 2	L->R	Mac 5	PSEN1_NOTCH2	psen1_notch2
14	Neu 2	L->R	Mac 5	RPS19_C5AR1	rps19_CABZ01041494.1
14	Neu 2	L->R	Mac 5	TGFB1_ACVRL1	tgfb1b_acvrl1
14	Neu 2	L->R	Mac 5	TGFB1_CXCR4	tgfb1b_cxcr4b
14	Neu 2	L->R	Mac 5	TGFB1_SMAD3	tgfb1b_smad3a
14	Neu 2	L->R	Mac 5	TNF_TRADD	tnfa_tradd
14	Neu 2	L->R	Mac 5	TNF_TRADD	tnfb_tradd
14	Neu 2	L->R	Mac 5	VEGFA_GPC1	vegfab_gpc1b
15	Neu 2	L->R	Mac 6	ADAM10_IL6R	adam10a_il6r
15	Neu 2	L->R	Mac 6	ADAM10_NOTCH2	adam10a_si:ch73-281k2.5
15	Neu 2	L->R	Mac 6	ADAM10_NOTCH2	adam10a_notch2
15	Neu 2	L->R	Mac 6	ADAM10_TSPAN14	adam10a_tspan14
15	Neu 2	L->R	Mac 6	ADAM17_IL6R	adam17a_il6r
15	Neu 2	L->R	Mac 6	ADAM17_ITGA5	adam17a_itga5
15	Neu 2	L->R	Mac 6	ADAM28_ITGA4	adam28_itga4
15	Neu 2	L->R	Mac 6	ADM_GPR84	adma_gpr84
15	Neu 2	L->R	Mac 6	AGTRAP_RACK1	agtrap_rack1
15	Neu 2	L->R	Mac 6	ARF6_SMAP1	arf6a_smap1
15	Neu 2	L->R	Mac 6	ARF6_SMAP1	arf6b_smap1
15	Neu 2	L->R	Mac 6	BSG_SELE	bsg_selp
15	Neu 2	L->R	Mac 6	CALM2_ABCA1	calm3a_abca1a
15	Neu 2	L->R	Mac 6	CALM2_ABCA1	calm3a_abca1b
15	Neu 2	L->R	Mac 6	CALM2_ABCA1	calm2a_abca1a
15	Neu 2	L->R	Mac 6	CALM2_ABCA1	calm2a_abca1b
15	Neu 2	L->R	Mac 6	CD99_CD81	cd99_cd81a
15	Neu 2	L->R	Mac 6	CNTF_IL6R	m17_il6r
15	Neu 2	L->R	Mac 6	CSF3_CSF1R	csf3a_csf1ra
15	Neu 2	L->R	Mac 6	CSF3_CSF1R	csf3a_csf1rb
15	Neu 2	L->R	Mac 6	CSF3_CSF3R	csf3a_csf3r
15	Neu 2	L->R	Mac 6	CSF3_CSF1R	csf3b_csf1ra
15	Neu 2	L->R	Mac 6	CSF3_CSF1R	csf3b_csf1rb
15	Neu 2	L->R	Mac 6	CSF3_CSF3R	csf3b_csf3r
15	Neu 2	L->R	Mac 6	CXCL9_CXCR3	BX323596.1_cxcr3.3
15	Neu 2	L->R	Mac 6	CXCL9_CXCR3	BX323596.2_cxcr3.3
15	Neu 2	L->R	Mac 6	F13A1_ITGA4	f13a1b_itga4
15	Neu 2	L->R	Mac 6	GNAI2_ADCY7	gnai2b_adcy7
15	Neu 2	L->R	Mac 6	GNAI2_C5AR1	gnai2b_CABZ01041494.1
15	Neu 2	L->R	Mac 6	GNAI2_CXCR3	gnai2b_cxcr3.3
15	Neu 2	L->R	Mac 6	GNAI2_S1PR4	gnai2b_s1pr4
15	Neu 2	L->R	Mac 6	GNAI2_ADCY7	gnai2a_adcy7
15	Neu 2	L->R	Mac 6	GNAI2_C5AR1	gnai2a_CABZ01041494.1
15	Neu 2	L->R	Mac 6	GNAI2_CXCR3	gnai2a_cxcr3.3
15	Neu 2	L->R	Mac 6	GNAI2_S1PR4	gnai2a_s1pr4
15	Neu 2	L->R	Mac 6	GNAS_ADCY7	gnas_adcy7
15	Neu 2	L->R	Mac 6	GPI_AMFR	gpia_amfra
15	Neu 2	L->R	Mac 6	HMGB1_AGER	hmgb1a_si:ch211-79k12.1
15	Neu 2	L->R	Mac 6	HMGB1_CXCR4	hmgb1a_cxcr4a
15	Neu 2	L->R	Mac 6	HMGB1_CXCR4	hmgb1a_cxcr4b
15	Neu 2	L->R	Mac 6	ICAM3_ITGB2	si:ch211-66e2.3_itgb2
15	Neu 2	L->R	Mac 6	ICAM3_ITGB2	si:ch73-208g10.1_itgb2
15	Neu 2	L->R	Mac 6	ICAM3_ITGB2	icam3_itgb2
15	Neu 2	L->R	Mac 6	IL16_CD4	il16_dicp3.1
15	Neu 2	L->R	Mac 6	IL16_CD4	il16_dicp2.1
15	Neu 2	L->R	Mac 6	IL16_CD4	il16_dicp2.2
15	Neu 2	L->R	Mac 6	INHBA_SMAD3	inhbaa_smad3a
15	Neu 2	L->R	Mac 6	MFNG_NOTCH2	mfng_si:ch73-281k2.5
15	Neu 2	L->R	Mac 6	MFNG_NOTCH2	mfng_notch2
15	Neu 2	L->R	Mac 6	MIF_CD74	mif_cd74a
15	Neu 2	L->R	Mac 6	MIF_CD74	mif_cd74b
15	Neu 2	L->R	Mac 6	MIF_CXCR4	mif_cxcr4a
15	Neu 2	L->R	Mac 6	MIF_CXCR4	mif_cxcr4b
15	Neu 2	L->R	Mac 6	MMP9_ITGB2	mmp9_itgb2
15	Neu 2	L->R	Mac 6	NUCB2_ERAP1	nucb2a_erap1b
15	Neu 2	L->R	Mac 6	PSEN1_NOTCH2	psen1_si:ch73-281k2.5
15	Neu 2	L->R	Mac 6	PSEN1_NOTCH2	psen1_notch2
15	Neu 2	L->R	Mac 6	RPS19_C5AR1	rps19_CABZ01041494.1
15	Neu 2	L->R	Mac 6	TGFB1_CXCR4	tgfb1b_cxcr4a
15	Neu 2	L->R	Mac 6	TGFB1_CXCR4	tgfb1b_cxcr4b
15	Neu 2	L->R	Mac 6	TGFB1_ITGAV	tgfb1b_itgav
15	Neu 2	L->R	Mac 6	TGFB1_SMAD3	tgfb1b_smad3a
15	Neu 2	L->R	Mac 6	TNF_TRADD	tnfa_tradd
15	Neu 2	L->R	Mac 6	TNF_TRADD	tnfb_tradd
15	Neu 2	L->R	Mac 6	VEGFA_GPC1	vegfab_gpc1b
15	Neu 2	L->R	Mac 6	VEGFA_ITGAV	vegfab_itgav
16	Neu 2	L->R	Mac 7	ADAM10_IL6R	adam10a_il6r
16	Neu 2	L->R	Mac 7	ADAM10_NOTCH2	adam10a_notch2
16	Neu 2	L->R	Mac 7	ADAM10_TSPAN14	adam10a_tspan14
16	Neu 2	L->R	Mac 7	ADAM17_IL6R	adam17a_il6r
16	Neu 2	L->R	Mac 7	ADAM17_ITGB1	adam17a_CABZ01058721.1
16	Neu 2	L->R	Mac 7	ADAM28_ITGA4	adam28_itga4
16	Neu 2	L->R	Mac 7	ADM_GPR84	adma_gpr84
16	Neu 2	L->R	Mac 7	AGTRAP_RACK1	agtrap_rack1
16	Neu 2	L->R	Mac 7	ARF6_SMAP1	arf6a_smap1
16	Neu 2	L->R	Mac 7	ARF6_SMAP1	arf6b_smap1
16	Neu 2	L->R	Mac 7	CALM2_ABCA1	calm3a_abca1a
16	Neu 2	L->R	Mac 7	CALM2_ABCA1	calm3a_abca1b
16	Neu 2	L->R	Mac 7	CALM2_ABCA1	calm2a_abca1a
16	Neu 2	L->R	Mac 7	CALM2_ABCA1	calm2a_abca1b
16	Neu 2	L->R	Mac 7	CD99_CD81	cd99_cd81a
16	Neu 2	L->R	Mac 7	CNTF_IL6R	m17_il6r
16	Neu 2	L->R	Mac 7	CSF3_CSF1R	csf3a_csf1ra
16	Neu 2	L->R	Mac 7	CSF3_CSF1R	csf3a_csf1rb
16	Neu 2	L->R	Mac 7	CSF3_CSF3R	csf3a_csf3r
16	Neu 2	L->R	Mac 7	CSF3_CSF1R	csf3b_csf1ra
16	Neu 2	L->R	Mac 7	CSF3_CSF1R	csf3b_csf1rb
16	Neu 2	L->R	Mac 7	CSF3_CSF3R	csf3b_csf3r
16	Neu 2	L->R	Mac 7	CXCL9_CXCR3	BX323596.1_cxcr3.3
16	Neu 2	L->R	Mac 7	CXCL9_CXCR3	BX323596.2_cxcr3.3
16	Neu 2	L->R	Mac 7	F13A1_ITGA4	f13a1b_itga4
16	Neu 2	L->R	Mac 7	F13A1_ITGB1	f13a1b_CABZ01058721.1
16	Neu 2	L->R	Mac 7	GNAI2_ADCY7	gnai2b_adcy7
16	Neu 2	L->R	Mac 7	GNAI2_C5AR1	gnai2b_CABZ01041494.1
16	Neu 2	L->R	Mac 7	GNAI2_CXCR3	gnai2b_cxcr3.3
16	Neu 2	L->R	Mac 7	GNAI2_ADCY7	gnai2a_adcy7
16	Neu 2	L->R	Mac 7	GNAI2_C5AR1	gnai2a_CABZ01041494.1
16	Neu 2	L->R	Mac 7	GNAI2_CXCR3	gnai2a_cxcr3.3
16	Neu 2	L->R	Mac 7	GNAS_ADCY7	gnas_adcy7
16	Neu 2	L->R	Mac 7	GRN_SORT1	grn1_sort1b
16	Neu 2	L->R	Mac 7	GRN_SORT1	grn2_sort1b
16	Neu 2	L->R	Mac 7	HBEGF_CD82	hbegfa_cd82a
16	Neu 2	L->R	Mac 7	HBEGF_CD82	hbegfb_cd82a
16	Neu 2	L->R	Mac 7	HMGB1_AGER	hmgb1a_si:ch211-79k12.1
16	Neu 2	L->R	Mac 7	HMGB1_CXCR4	hmgb1a_cxcr4b
16	Neu 2	L->R	Mac 7	ICAM3_ITGB2	si:ch211-66e2.3_itgb2
16	Neu 2	L->R	Mac 7	ICAM3_ITGB2	si:ch73-208g10.1_itgb2
16	Neu 2	L->R	Mac 7	ICAM3_ITGB2	icam3_itgb2
16	Neu 2	L->R	Mac 7	IL16_CD4	il16_cd4-1
16	Neu 2	L->R	Mac 7	IL16_CD4	il16_dicp3.3
16	Neu 2	L->R	Mac 7	IL16_CD4	il16_dicp3.1
16	Neu 2	L->R	Mac 7	IL16_CD4	il16_dicp2.1
16	Neu 2	L->R	Mac 7	MFNG_NOTCH2	mfng_notch2
16	Neu 2	L->R	Mac 7	MIF_CD74	mif_cd74a
16	Neu 2	L->R	Mac 7	MIF_CD74	mif_cd74b
16	Neu 2	L->R	Mac 7	MIF_CXCR4	mif_cxcr4b
16	Neu 2	L->R	Mac 7	MMP9_ITGB2	mmp9_itgb2
16	Neu 2	L->R	Mac 7	NUCB2_ERAP1	nucb2a_erap1b
16	Neu 2	L->R	Mac 7	PSAP_SORT1	psap_sort1b
16	Neu 2	L->R	Mac 7	PSEN1_NOTCH2	psen1_notch2
16	Neu 2	L->R	Mac 7	RPS19_C5AR1	rps19_CABZ01041494.1
16	Neu 2	L->R	Mac 7	TGFB1_ACVRL1	tgfb1b_acvrl1
16	Neu 2	L->R	Mac 7	TGFB1_CXCR4	tgfb1b_cxcr4b
16	Neu 2	L->R	Mac 7	TGFB1_ITGB1	tgfb1b_CABZ01058721.1
16	Neu 2	L->R	Mac 7	TIMP2_ITGB1	timp2b_CABZ01058721.1
16	Neu 2	L->R	Mac 7	TNF_TRADD	tnfa_tradd
16	Neu 2	L->R	Mac 7	TNF_TRADD	tnfb_tradd
16	Neu 2	L->R	Mac 7	VEGFA_GPC1	vegfab_gpc1b
16	Neu 2	L->R	Mac 7	VEGFA_ITGB1	vegfab_CABZ01058721.1
16	Neu 2	L->R	Mac 7	VEGFA_NRP1	vegfab_nrp1a
17	Neu 2	L->R	MN	ADAM10_GPNMB	adam10a_gpnmb
17	Neu 2	L->R	MN	ADAM10_IL6R	adam10a_il6r
17	Neu 2	L->R	MN	ADAM10_NOTCH1	adam10a_notch1a
17	Neu 2	L->R	MN	ADAM10_NOTCH2	adam10a_notch2
17	Neu 2	L->R	MN	ADAM10_TSPAN14	adam10a_tspan14
17	Neu 2	L->R	MN	ADAM17_IL6R	adam17a_il6r
17	Neu 2	L->R	MN	ADAM17_ITGA5	adam17a_itga5
17	Neu 2	L->R	MN	ADAM17_NOTCH1	adam17a_notch1a
17	Neu 2	L->R	MN	ADAM28_ITGA4	adam28_itga4
17	Neu 2	L->R	MN	ADM_GPR84	adma_gpr84
17	Neu 2	L->R	MN	AGTRAP_RACK1	agtrap_rack1
17	Neu 2	L->R	MN	ARF6_SMAP1	arf6a_smap1
17	Neu 2	L->R	MN	ARF6_SMAP1	arf6b_smap1
17	Neu 2	L->R	MN	CALM2_ABCA1	calm3a_abca1a
17	Neu 2	L->R	MN	CALM2_ABCA1	calm3a_abca1b
17	Neu 2	L->R	MN	CALM2_ABCA1	calm2a_abca1a
17	Neu 2	L->R	MN	CALM2_ABCA1	calm2a_abca1b
17	Neu 2	L->R	MN	CD99_CD81	cd99_cd81a
17	Neu 2	L->R	MN	CNTF_IL6R	m17_il6r
17	Neu 2	L->R	MN	CSF3_CSF3R	csf3a_csf3r
17	Neu 2	L->R	MN	CSF3_CSF3R	csf3b_csf3r
17	Neu 2	L->R	MN	CXCL9_CXCR3	BX323596.1_cxcr3.3
17	Neu 2	L->R	MN	CXCL9_CXCR3	BX323596.2_cxcr3.3
17	Neu 2	L->R	MN	F13A1_ITGA4	f13a1b_itga4
17	Neu 2	L->R	MN	FAM3C_LAMP1	fam3c_lamp1a
17	Neu 2	L->R	MN	GNAI2_ADCY7	gnai2b_adcy7
17	Neu 2	L->R	MN	GNAI2_C5AR1	gnai2b_CABZ01041494.1
17	Neu 2	L->R	MN	GNAI2_CXCR3	gnai2b_cxcr3.3
17	Neu 2	L->R	MN	GNAI2_ADCY7	gnai2a_adcy7
17	Neu 2	L->R	MN	GNAI2_C5AR1	gnai2a_CABZ01041494.1
17	Neu 2	L->R	MN	GNAI2_CXCR3	gnai2a_cxcr3.3
17	Neu 2	L->R	MN	GNAS_ADCY7	gnas_adcy7
17	Neu 2	L->R	MN	GRN_SORT1	grn1_sort1b
17	Neu 2	L->R	MN	GRN_TNFRSF1A	grn1_fas
17	Neu 2	L->R	MN	GRN_SORT1	grn2_sort1b
17	Neu 2	L->R	MN	GRN_TNFRSF1A	grn2_fas
17	Neu 2	L->R	MN	HBEGF_CD82	hbegfa_cd82a
17	Neu 2	L->R	MN	HBEGF_CD82	hbegfb_cd82a
17	Neu 2	L->R	MN	HMGB1_AGER	hmgb1a_si:ch211-79k12.1
17	Neu 2	L->R	MN	HMGB1_CXCR4	hmgb1a_cxcr4b
17	Neu 2	L->R	MN	ICAM3_ITGB2	si:ch211-66e2.3_itgb2
17	Neu 2	L->R	MN	ICAM3_ITGB2	si:ch73-208g10.1_itgb2
17	Neu 2	L->R	MN	ICAM3_ITGB2	icam3_itgb2
17	Neu 2	L->R	MN	IL16_CD4	il16_dicp3.3
17	Neu 2	L->R	MN	IL16_CD4	il16_dicp3.1
17	Neu 2	L->R	MN	IL16_CD4	il16_dicp2.1
17	Neu 2	L->R	MN	IL16_CD4	il16_dicp2.2
17	Neu 2	L->R	MN	INHBA_SMAD3	inhbaa_smad3a
17	Neu 2	L->R	MN	MFNG_NOTCH1	mfng_notch1a
17	Neu 2	L->R	MN	MFNG_NOTCH2	mfng_notch2
17	Neu 2	L->R	MN	MIF_CD74	mif_cd74a
17	Neu 2	L->R	MN	MIF_CD74	mif_cd74b
17	Neu 2	L->R	MN	MIF_CXCR4	mif_cxcr4b
17	Neu 2	L->R	MN	MMP9_ITGB2	mmp9_itgb2
17	Neu 2	L->R	MN	NUCB2_ERAP1	nucb2a_erap1b
17	Neu 2	L->R	MN	PROS1_MERTK	pros1_mertka
17	Neu 2	L->R	MN	PSAP_SORT1	psap_sort1b
17	Neu 2	L->R	MN	PSEN1_NOTCH1	psen1_notch1a
17	Neu 2	L->R	MN	PSEN1_NOTCH2	psen1_notch2
17	Neu 2	L->R	MN	RPS19_C5AR1	rps19_CABZ01041494.1
17	Neu 2	L->R	MN	TGFB1_ACVRL1	tgfb1b_acvrl1
17	Neu 2	L->R	MN	TGFB1_CXCR4	tgfb1b_cxcr4b
17	Neu 2	L->R	MN	TGFB1_ITGAV	tgfb1b_itgav
17	Neu 2	L->R	MN	TGFB1_SMAD3	tgfb1b_smad3a
17	Neu 2	L->R	MN	TNF_NOTCH1	tnfa_notch1a
17	Neu 2	L->R	MN	TNF_TNFRSF1A	tnfa_fas
17	Neu 2	L->R	MN	TNF_TRADD	tnfa_tradd
17	Neu 2	L->R	MN	TNF_NOTCH1	tnfb_notch1a
17	Neu 2	L->R	MN	TNF_TNFRSF1A	tnfb_fas
17	Neu 2	L->R	MN	TNF_TRADD	tnfb_tradd
17	Neu 2	L->R	MN	UBA52_NOTCH1	uba52_notch1a
17	Neu 2	L->R	MN	VEGFA_GPC1	vegfab_gpc1b
17	Neu 2	L->R	MN	VEGFA_ITGAV	vegfab_itgav
18	Neu 2	L->R	Mac 8	ADAM10_IL6R	adam10a_il6r
18	Neu 2	L->R	Mac 8	ADAM10_NOTCH2	adam10a_notch2
18	Neu 2	L->R	Mac 8	ADAM17_IL6R	adam17a_il6r
18	Neu 2	L->R	Mac 8	ADM_GPR84	adma_gpr84
18	Neu 2	L->R	Mac 8	AGTRAP_RACK1	agtrap_rack1
18	Neu 2	L->R	Mac 8	ARF6_SMAP1	arf6a_smap1
18	Neu 2	L->R	Mac 8	ARF6_SMAP1	arf6b_smap1
18	Neu 2	L->R	Mac 8	CALM2_ABCA1	calm3a_abca1a
18	Neu 2	L->R	Mac 8	CALM2_ABCA1	calm3a_abca1b
18	Neu 2	L->R	Mac 8	CALM2_ABCA1	calm2a_abca1a
18	Neu 2	L->R	Mac 8	CALM2_ABCA1	calm2a_abca1b
18	Neu 2	L->R	Mac 8	CD99_CD81	cd99_cd81a
18	Neu 2	L->R	Mac 8	CNTF_IL6R	m17_il6r
18	Neu 2	L->R	Mac 8	CSF3_CSF1R	csf3a_csf1rb
18	Neu 2	L->R	Mac 8	CSF3_CSF1R	csf3b_csf1rb
18	Neu 2	L->R	Mac 8	GNAI2_C5AR1	gnai2b_CABZ01041494.1
18	Neu 2	L->R	Mac 8	GNAI2_S1PR4	gnai2b_s1pr4
18	Neu 2	L->R	Mac 8	GNAI2_C5AR1	gnai2a_CABZ01041494.1
18	Neu 2	L->R	Mac 8	GNAI2_S1PR4	gnai2a_s1pr4
18	Neu 2	L->R	Mac 8	HBEGF_CD82	hbegfa_cd82a
18	Neu 2	L->R	Mac 8	HBEGF_CD82	hbegfb_cd82a
18	Neu 2	L->R	Mac 8	HMGB1_AGER	hmgb1a_si:ch211-79k12.1
18	Neu 2	L->R	Mac 8	HMGB1_CXCR4	hmgb1a_cxcr4a
18	Neu 2	L->R	Mac 8	HMGB1_CXCR4	hmgb1a_cxcr4b
18	Neu 2	L->R	Mac 8	ICAM3_ITGB2	si:ch211-66e2.3_itgb2
18	Neu 2	L->R	Mac 8	ICAM3_ITGB2	si:ch73-208g10.1_itgb2
18	Neu 2	L->R	Mac 8	ICAM3_ITGB2	icam3_itgb2
18	Neu 2	L->R	Mac 8	INHBA_BAMBI	inhbaa_bambia
18	Neu 2	L->R	Mac 8	MFNG_NOTCH2	mfng_notch2
18	Neu 2	L->R	Mac 8	MIF_CD74	mif_cd74a
18	Neu 2	L->R	Mac 8	MIF_CD74	mif_cd74b
18	Neu 2	L->R	Mac 8	MIF_CXCR4	mif_cxcr4a
18	Neu 2	L->R	Mac 8	MIF_CXCR4	mif_cxcr4b
18	Neu 2	L->R	Mac 8	MMP9_ITGB2	mmp9_itgb2
18	Neu 2	L->R	Mac 8	PSEN1_NOTCH2	psen1_notch2
18	Neu 2	L->R	Mac 8	RPS19_C5AR1	rps19_CABZ01041494.1
18	Neu 2	L->R	Mac 8	TGFB1_ACVRL1	tgfb1b_acvrl1
18	Neu 2	L->R	Mac 8	TGFB1_CXCR4	tgfb1b_cxcr4a
18	Neu 2	L->R	Mac 8	TGFB1_CXCR4	tgfb1b_cxcr4b
19	Neu 2	L->R	Mac 9	ACTR2_ADRB2	actr2a_adrb2a
19	Neu 2	L->R	Mac 9	ACTR2_ADRB2	actr2b_adrb2a
19	Neu 2	L->R	Mac 9	ADAM10_NOTCH1	adam10a_notch1a
19	Neu 2	L->R	Mac 9	ADAM10_NOTCH2	adam10a_notch2
19	Neu 2	L->R	Mac 9	ADAM10_TSPAN14	adam10a_tspan14
19	Neu 2	L->R	Mac 9	ADAM17_ITGB1	adam17a_itgb1b.1
19	Neu 2	L->R	Mac 9	ADAM17_ITGB1	adam17a_itgb1a
19	Neu 2	L->R	Mac 9	ADAM17_NOTCH1	adam17a_notch1a
19	Neu 2	L->R	Mac 9	ADM_ADRB2	adma_adrb2a
19	Neu 2	L->R	Mac 9	ADM_ADRB3	adma_adrb3b
19	Neu 2	L->R	Mac 9	ADM_RAMP2	adma_ramp2
19	Neu 2	L->R	Mac 9	AGTRAP_RACK1	agtrap_rack1
19	Neu 2	L->R	Mac 9	ARF6_SMAP1	arf6a_smap1
19	Neu 2	L->R	Mac 9	ARF6_SMAP1	arf6b_smap1
19	Neu 2	L->R	Mac 9	ARPC5_ADRB2	arpc5a_adrb2a
19	Neu 2	L->R	Mac 9	ARPC5_ADRB2	arpc5b_adrb2a
19	Neu 2	L->R	Mac 9	CALM2_ABCA1	calm3a_abca1a
19	Neu 2	L->R	Mac 9	CALM2_ABCA1	calm3a_abca1b
19	Neu 2	L->R	Mac 9	CALM2_INSR	calm3a_insra
19	Neu 2	L->R	Mac 9	CALM2_KCNQ5	calm3a_kcnq5b
19	Neu 2	L->R	Mac 9	CALM2_KCNQ5	calm3a_kcnq5a
19	Neu 2	L->R	Mac 9	CALM2_ABCA1	calm2a_abca1a
19	Neu 2	L->R	Mac 9	CALM2_ABCA1	calm2a_abca1b
19	Neu 2	L->R	Mac 9	CALM2_INSR	calm2a_insra
19	Neu 2	L->R	Mac 9	CALM2_KCNQ5	calm2a_kcnq5b
19	Neu 2	L->R	Mac 9	CALM2_KCNQ5	calm2a_kcnq5a
19	Neu 2	L->R	Mac 9	CD99_CD81	cd99_cd81a
19	Neu 2	L->R	Mac 9	CSF3_CSF1R	csf3a_csf1rb
19	Neu 2	L->R	Mac 9	CSF3_CSF3R	csf3a_csf3r
19	Neu 2	L->R	Mac 9	CSF3_CSF1R	csf3b_csf1rb
19	Neu 2	L->R	Mac 9	CSF3_CSF3R	csf3b_csf3r
19	Neu 2	L->R	Mac 9	F13A1_ITGB1	f13a1b_itgb1b.1
19	Neu 2	L->R	Mac 9	F13A1_ITGB1	f13a1b_itgb1a
19	Neu 2	L->R	Mac 9	GNAI2_S1PR4	gnai2b_s1pr4
19	Neu 2	L->R	Mac 9	GNAI2_S1PR4	gnai2a_s1pr4
19	Neu 2	L->R	Mac 9	GNAS_ADRB3	gnas_adrb3b
19	Neu 2	L->R	Mac 9	HBEGF_CD82	hbegfa_cd82a
19	Neu 2	L->R	Mac 9	HBEGF_CD82	hbegfa_cd82b
19	Neu 2	L->R	Mac 9	HBEGF_CD82	hbegfb_cd82a
19	Neu 2	L->R	Mac 9	HBEGF_CD82	hbegfb_cd82b
19	Neu 2	L->R	Mac 9	HMGB1_AGER	hmgb1a_si:ch211-79k12.1
19	Neu 2	L->R	Mac 9	HMGB1_CXCR4	hmgb1a_cxcr4a
19	Neu 2	L->R	Mac 9	HMGB1_CXCR4	hmgb1a_cxcr4b
19	Neu 2	L->R	Mac 9	HRAS_INSR	hrasb_insra
19	Neu 2	L->R	Mac 9	HRAS_SDC2	hrasb_sdc2
19	Neu 2	L->R	Mac 9	HSPA8_ADRB2	hspa8_adrb2a
19	Neu 2	L->R	Mac 9	ICAM3_ITGB2	si:ch211-66e2.3_itgb2
19	Neu 2	L->R	Mac 9	ICAM3_ITGB2	si:ch73-208g10.1_itgb2
19	Neu 2	L->R	Mac 9	ICAM3_ITGB2	icam3_itgb2
19	Neu 2	L->R	Mac 9	IL16_CD4	il16_dicp3.3
19	Neu 2	L->R	Mac 9	IL1B_ADRB2	il1b_adrb2a
19	Neu 2	L->R	Mac 9	INHBA_ACVR2A	inhbaa_acvr2aa
19	Neu 2	L->R	Mac 9	INHBA_SMAD3	inhbaa_smad3a
19	Neu 2	L->R	Mac 9	LTF_TFRC	tfa_tfr1b
19	Neu 2	L->R	Mac 9	MFNG_NOTCH1	mfng_notch1a
19	Neu 2	L->R	Mac 9	MFNG_NOTCH2	mfng_notch2
19	Neu 2	L->R	Mac 9	MIF_CD74	mif_cd74a
19	Neu 2	L->R	Mac 9	MIF_CD74	mif_cd74b
19	Neu 2	L->R	Mac 9	MIF_CXCR4	mif_cxcr4a
19	Neu 2	L->R	Mac 9	MIF_CXCR4	mif_cxcr4b
19	Neu 2	L->R	Mac 9	MMP9_ITGB2	mmp9_itgb2
19	Neu 2	L->R	Mac 9	NAMPT_INSR	nampta_insra
19	Neu 2	L->R	Mac 9	NUCB2_ERAP1	nucb2a_erap1b
19	Neu 2	L->R	Mac 9	PIGF_FLT1	pigf_flt1
19	Neu 2	L->R	Mac 9	PSEN1_NOTCH1	psen1_notch1a
19	Neu 2	L->R	Mac 9	PSEN1_NOTCH2	psen1_notch2
19	Neu 2	L->R	Mac 9	RTN4_NGFR	rtn4a_ngfrb
19	Neu 2	L->R	Mac 9	TGFB1_CXCR4	tgfb1b_cxcr4a
19	Neu 2	L->R	Mac 9	TGFB1_CXCR4	tgfb1b_cxcr4b
19	Neu 2	L->R	Mac 9	TGFB1_ITGAV	tgfb1b_itgav
19	Neu 2	L->R	Mac 9	TGFB1_ITGB1	tgfb1b_itgb1b.1
19	Neu 2	L->R	Mac 9	TGFB1_ITGB1	tgfb1b_itgb1a
19	Neu 2	L->R	Mac 9	TGFB1_SDC2	tgfb1b_sdc2
19	Neu 2	L->R	Mac 9	TGFB1_SMAD3	tgfb1b_smad3a
19	Neu 2	L->R	Mac 9	TIMP2_ITGB1	timp2b_itgb1b.1
19	Neu 2	L->R	Mac 9	TIMP2_ITGB1	timp2b_itgb1a
19	Neu 2	L->R	Mac 9	TNF_NOTCH1	tnfa_notch1a
19	Neu 2	L->R	Mac 9	TNF_TRADD	tnfa_tradd
19	Neu 2	L->R	Mac 9	TNF_NOTCH1	tnfb_notch1a
19	Neu 2	L->R	Mac 9	TNF_TRADD	tnfb_tradd
19	Neu 2	L->R	Mac 9	TNFSF13B_TFRC	tnfsf13b_tfr1b
19	Neu 2	L->R	Mac 9	UBA52_NOTCH1	uba52_notch1a
19	Neu 2	L->R	Mac 9	VEGFA_FLT1	vegfab_flt1
19	Neu 2	L->R	Mac 9	VEGFA_ITGAV	vegfab_itgav
19	Neu 2	L->R	Mac 9	VEGFA_ITGB1	vegfab_itgb1b.1
19	Neu 2	L->R	Mac 9	VEGFA_ITGB1	vegfab_itgb1a
19	Neu 2	L->R	Mac 9	VEGFA_NRP2	vegfab_nrp2b

## Sheet: links for cytoscape PBS7d
7dpci_Neu-ligand to Mac-receptor
Cluster pair ID	neutrophil	pair type	macrophage	no. pairs	edge width	condition
0	Neu 1	L->R	Mac 1	12	2.4	PBS7d
1	Neu 1	L->R	Mac 2	19	3.8	PBS7d
2	Neu 1	L->R	Mac 3	18	3.6	PBS7d
3	Neu 1	L->R	Mac 4	30	6	PBS7d
4	Neu 1	L->R	Mac 5	39	7.8	PBS7d
5	Neu 1	L->R	Mac 6	50	10	PBS7d
6	Neu 1	L->R	Mac 7	31	6.2	PBS7d
7	Neu 1	L->R	MN	28	5.6	PBS7d
8	Neu 1	L->R	Mac 8	65	13	PBS7d
9	Neu 1	L->R	Mac 9	27	5.4	PBS7d
10	Neu 2	L->R	Mac 1	16	3.2	PBS7d
11	Neu 2	L->R	Mac 2	21	4.2	PBS7d
12	Neu 2	L->R	Mac 3	20	4	PBS7d
13	Neu 2	L->R	Mac 4	31	6.2	PBS7d
14	Neu 2	L->R	Mac 5	39	7.8	PBS7d
15	Neu 2	L->R	Mac 6	54	10.8	PBS7d
16	Neu 2	L->R	Mac 7	33	6.6	PBS7d
17	Neu 2	L->R	MN	31	6.2	PBS7d
18	Neu 2	L->R	Mac 8	64	12.8	PBS7d
19	Neu 2	L->R	Mac 9	27	5.4	PBS7d

## Sheet: links for cytoscape CL7d
7dpci_Neu-ligand to Mac-receptor
Cluster pair ID	neutrophil	pair type	macrophage	no. pairs	edge width	condition
0	Neu 1	L->R	Mac 1	23	4.6	CL7d
1	Neu 1	L->R	Mac 2	36	7.2	CL7d
2	Neu 1	L->R	Mac 3	26	5.2	CL7d
3	Neu 1	L->R	Mac 4	20	4	CL7d
4	Neu 1	L->R	Mac 5	20	4	CL7d
5	Neu 1	L->R	Mac 6	18	3.6	CL7d
6	Neu 1	L->R	Mac 7	38	7.6	CL7d
7	Neu 1	L->R	MN	42	8.4	CL7d
8	Neu 1	L->R	Mac 8	28	5.6	CL7d
9	Neu 1	L->R	Mac 9	32	6.4	CL7d
10	Neu 2	L->R	Mac 1	10	2	CL7d
11	Neu 2	L->R	Mac 2	27	5.4	CL7d
12	Neu 2	L->R	Mac 3	11	2.2	CL7d
13	Neu 2	L->R	Mac 4	9	1.8	CL7d
14	Neu 2	L->R	Mac 5	11	2.2	CL7d
15	Neu 2	L->R	Mac 6	5	1	CL7d
16	Neu 2	L->R	Mac 7	23	4.6	CL7d
17	Neu 2	L->R	MN	29	5.8	CL7d
18	Neu 2	L->R	Mac 8	22	4.4	CL7d
19	Neu 2	L->R	Mac 9	23	4.6	CL7d

## Sheet: links PBS7d + CL7d
7dpci_Neu-ligand to Mac-receptor
Cluster pair ID	neutrophil	pair type	macrophage	no. pairs	edge width	condition
0	Neu 1	L->R	Mac 1	12	2.4	PBS7d
1	Neu 1	L->R	Mac 2	19	3.8	PBS7d
2	Neu 1	L->R	Mac 3	18	3.6	PBS7d
3	Neu 1	L->R	Mac 4	30	6	PBS7d
4	Neu 1	L->R	Mac 5	39	7.8	PBS7d
5	Neu 1	L->R	Mac 6	50	10	PBS7d
6	Neu 1	L->R	Mac 7	31	6.2	PBS7d
7	Neu 1	L->R	MN	28	5.6	PBS7d
8	Neu 1	L->R	Mac 8	65	13	PBS7d
9	Neu 1	L->R	Mac 9	27	5.4	PBS7d
10	Neu 2	L->R	Mac 1	16	3.2	PBS7d
11	Neu 2	L->R	Mac 2	21	4.2	PBS7d
12	Neu 2	L->R	Mac 3	20	4	PBS7d
13	Neu 2	L->R	Mac 4	31	6.2	PBS7d
14	Neu 2	L->R	Mac 5	39	7.8	PBS7d
15	Neu 2	L->R	Mac 6	54	10.8	PBS7d
16	Neu 2	L->R	Mac 7	33	6.6	PBS7d
17	Neu 2	L->R	MN	31	6.2	PBS7d
18	Neu 2	L->R	Mac 8	64	12.8	PBS7d
19	Neu 2	L->R	Mac 9	27	5.4	PBS7d
0	Neu 1	L->R	Mac 1	23	4.6	CL7d
1	Neu 1	L->R	Mac 2	36	7.2	CL7d
2	Neu 1	L->R	Mac 3	26	5.2	CL7d
3	Neu 1	L->R	Mac 4	20	4	CL7d
4	Neu 1	L->R	Mac 5	20	4	CL7d
5	Neu 1	L->R	Mac 6	18	3.6	CL7d
6	Neu 1	L->R	Mac 7	38	7.6	CL7d
7	Neu 1	L->R	MN	42	8.4	CL7d
8	Neu 1	L->R	Mac 8	28	5.6	CL7d
9	Neu 1	L->R	Mac 9	32	6.4	CL7d
10	Neu 2	L->R	Mac 1	10	2	CL7d
11	Neu 2	L->R	Mac 2	27	5.4	CL7d
12	Neu 2	L->R	Mac 3	11	2.2	CL7d
13	Neu 2	L->R	Mac 4	9	1.8	CL7d
14	Neu 2	L->R	Mac 5	11	2.2	CL7d
15	Neu 2	L->R	Mac 6	5	1	CL7d
16	Neu 2	L->R	Mac 7	23	4.6	CL7d
17	Neu 2	L->R	MN	29	5.8	CL7d
18	Neu 2	L->R	Mac 8	22	4.4	CL7d
19	Neu 2	L->R	Mac 9	23	4.6	CL7d

## Sheet: links for cytoscape 7d common
7dpci_Neu-ligand to Mac-receptor
Cluster pair ID	neutrophil	pair type	macrophage	no. pairs	edge width	condition
0	Neu 1	L->R	Mac 1	109	10.9	7d common
1	Neu 1	L->R	Mac 2	87	8.7	7d common
2	Neu 1	L->R	Mac 3	113	11.3	7d common
3	Neu 1	L->R	Mac 4	86	8.6	7d common
4	Neu 1	L->R	Mac 5	53	5.3	7d common
5	Neu 1	L->R	Mac 6	66	6.6	7d common
6	Neu 1	L->R	Mac 7	63	6.3	7d common
7	Neu 1	L->R	MN	72	7.2	7d common
8	Neu 1	L->R	Mac 8	41	4.1	7d common
9	Neu 1	L->R	Mac 9	87	8.7	7d common
10	Neu 2	L->R	Mac 1	107	10.7	7d common
11	Neu 2	L->R	Mac 2	86	8.6	7d common
12	Neu 2	L->R	Mac 3	114	11.4	7d common
13	Neu 2	L->R	Mac 4	87	8.7	7d common
14	Neu 2	L->R	Mac 5	54	5.4	7d common
15	Neu 2	L->R	Mac 6	66	6.6	7d common
16	Neu 2	L->R	Mac 7	64	6.4	7d common
17	Neu 2	L->R	MN	73	7.3	7d common
18	Neu 2	L->R	Mac 8	39	3.9	7d common
19	Neu 2	L->R	Mac 9	87	8.7	7d common

## Sheet: nodes for cytoscape
7dpci_Neu-ligand to Mac-receptor
cluster ID	type	PBS7d	CL7d	7d common	total	size PBS7d	size CL7d	size PBS7d+CL7d	size 7d common	size total
Neu 1	ligand	319	283	777	1379	31.9	28.3	60.2	77.7
Neu 2	ligand	336	170	777	1283	33.6	17	50.6	77.7
Mac 1	receptor	28	33	216	277	14	16.5	6.1	21.6
Mac 2	receptor	40	63	173	276	20	31.5	10.3	17.3
Mac 3	receptor	38	37	227	302	19	18.5	7.5	22.7
Mac 4	receptor	61	29	173	263	30.5	14.5	9	17.3
Mac 5	receptor	78	31	107	216	39	15.5	10.9	10.7
Mac 6	receptor	104	23	132	259	52	11.5	12.7	13.2
Mac 7	receptor	64	61	127	252	32	30.5	12.5	12.7
MN	receptor	59	71	145	275	29.5	35.5	13	14.5
Mac 8	receptor	129	50	80	259	64.5	25	17.9	8
Mac 9	receptor	54	55	174	283	27	27.5	10.9	17.4
