# Supplementary material for: Comparative single-cell profiling reveals distinct cardiac resident macrophages essential for zebrafish heart regeneration
Source: eLife. 2023 Jul 27;12:e84679. doi: 10.7554/eLife.84679 (PMC10411971; doi:10.7554/eLife.84679)
Supplement: Figure 6—source data 1. [file elife-84679-fig6-data1.xlsx]

## Sheet: Sheet1
R script for pseudotemporal trajectory analysis
# Subset of all macrophage and Neutrophil cells
Integrated_Seurat.Macrophage.Neutrophil <- subset(x = Integrated_Seurat, idents = c("Macrophage_2","Macrophage_3","Macrophage_5","Macrophage_6","Macrophage_7","Macrophage_8","Macrophage_10","M<-->N_11","tnnt2a+Mac_13","p2rx3a+Mac_17","Neutrophil_0","Neutrophil_4"))
saveRDS(Integrated_Seurat.Macrophage.Neutrophil, file = "integrated_seurat_clustered-postUMAP_Macrophage_Neutrophil.rds")
Integrated_Seurat.Macrophage.Neutrophil <- readRDS("integrated_seurat_clustered-postUMAP_Macrophage_Neutrophil.rds")
DimPlot(Integrated_Seurat.Macrophage.Neutrophil, split.by = "sample")
# Pseudotime analysis by monocle (macrophage and neutrophil)
cds <- as.cell_data_set(Integrated_Seurat.Macrophage.Neutrophil, assay = "RNA")
cds <- estimate_size_factors(cds)
cds@rowRanges@elementMetadata@listData[["gene_short_name"]] <- rownames(Integrated_Seurat.Macrophage.Neutrophil[["RNA"]])
cds = cluster_cells(cds, resolution=1e-5)
p1 <- plot_cells(cds, color_cells_by = "cluster", show_trajectory_graph = FALSE)
p2 <- plot_cells(cds, color_cells_by = "partition", show_trajectory_graph = FALSE)
wrap_plots(p1, p2)
integrated.sub <- subset(as.Seurat(cds, assay = NULL), monocle3_partitions == 1)
cds <- as.cell_data_set(integrated.sub)
cds = cluster_cells(cds, resolution=4e-5)
p1 <- plot_cells(cds, color_cells_by = "cluster", show_trajectory_graph = FALSE)
p2 <- plot_cells(cds, color_cells_by = "partition", show_trajectory_graph = FALSE)
wrap_plots(p1, p2)
cds <- learn_graph(cds, use_partition = F, verbose = FALSE)
plot_cells(cds,
color_cells_by = "cluster",
label_groups_by_cluster=FALSE,
label_leaves=FALSE,
label_branch_points=FALSE)
#cds <- order_cells(cds, root_cells = colnames(cds[,clusters(cds) == 4]))
cds <- order_cells(cds)
plot_cells(cds,
color_cells_by = "pseudotime",
label_cell_groups = FALSE,
label_groups_by_cluster=FALSE,
label_leaves=FALSE,
label_branch_points=FALSE,
label_roots = FALSE,
trajectory_graph_color = "grey60")
plot_cells(cds, label_branch_points = FALSE, label_roots = TRUE, graph_label_size = 4)
colData(cds)$assigned_pseudotime <- as.numeric(pseudotime(cds))
colData(cds)$assigned_pseudotime_point <- as.integer(pseudotime(cds))
plot_cells(cds,
color_cells_by = "pseudotime",
label_cell_groups=FALSE,
label_leaves=FALSE,
label_branch_points=FALSE,
graph_label_size=4,
show_trajectory_graph = FALSE, cell_size = 0.7)
saveRDS(cds, "integrated_macrophage_neutrophil_cds_pseudotime.rds")
cds <- readRDS("integrated_macrophage_neutrophil_cds_pseudotime.rds")
## split view of pseudotime plot for each condition
cds_subset_UN <- cds[,grepl("UN",colData(cds)$sample)]
plot_cells(cds_subset_UN,
color_cells_by = "pseudotime",
label_cell_groups=FALSE,
label_leaves=FALSE,
label_branch_points=FALSE,
graph_label_size=4,
show_trajectory_graph = FALSE, cell_size = 0.7)
cds_subset_PBS1d <- cds[,grepl("PBS1d",colData(cds)$sample)]
plot_cells(cds_subset_PBS1d,
color_cells_by = "pseudotime",
label_cell_groups=FALSE,
label_leaves=FALSE,
label_branch_points=FALSE,
graph_label_size=4,
show_trajectory_graph = FALSE, cell_size = 0.7)
cds_subset_PBS3d <- cds[,grepl("PBS3d",colData(cds)$sample)]
plot_cells(cds_subset_PBS3d,
color_cells_by = "pseudotime",
label_cell_groups=FALSE,
label_leaves=FALSE,
label_branch_points=FALSE,
graph_label_size=4,
show_trajectory_graph = FALSE, cell_size = 0.7)
cds_subset_PBS7d <- cds[,grepl("PBS7d",colData(cds)$sample)]
plot_cells(cds_subset_PBS7d,
color_cells_by = "pseudotime",
label_cell_groups=FALSE,
label_leaves=FALSE,
label_branch_points=FALSE,
graph_label_size=4,
show_trajectory_graph = FALSE, cell_size = 0.7)
cds_subset_CL1d <- cds[,grepl("CL1d",colData(cds)$sample)]
plot_cells(cds_subset_CL1d,
color_cells_by = "pseudotime",
label_cell_groups=FALSE,
label_leaves=FALSE,
label_branch_points=FALSE,
graph_label_size=4,
show_trajectory_graph = FALSE, cell_size = 0.7)
cds_subset_CL3d <- cds[,grepl("CL3d",colData(cds)$sample)]
plot_cells(cds_subset_CL3d,
color_cells_by = "pseudotime",
label_cell_groups=FALSE,
label_leaves=FALSE,
label_branch_points=FALSE,
graph_label_size=4,
show_trajectory_graph = FALSE, cell_size = 0.7)
cds_subset_CL7d <- cds[,grepl("CL7d",colData(cds)$sample)]
plot_cells(cds_subset_CL7d,
color_cells_by = "pseudotime",
label_cell_groups=FALSE,
label_leaves=FALSE,
label_branch_points=FALSE,
graph_label_size=4,
show_trajectory_graph = FALSE, cell_size = 0.7)
