# Supplementary material for: Comparative single-cell profiling reveals distinct cardiac resident macrophages essential for zebrafish heart regeneration
Source: eLife. 2023 Jul 27;12:e84679. doi: 10.7554/eLife.84679 (PMC10411971; doi:10.7554/eLife.84679)
Supplement: Figure 7—source data 1. [file elife-84679-fig7-data1.xlsx]

## Sheet: Figure 7A
Revacularization_Biological replicate 1
Samples_PBS	Revascularized %	Samples_CL	Revascularized %
PBS1	22.717	CL1	7.558
PBS2	19.33	CL2	9.736
PBS3	14.983	CL3	8.902
PBS4	13.809	CL4	13.622
PBS5	20.974	CL5	8.121
PBS6	16.588	CL6	11.607
PBS7	12.313	CL7	13.959
		CL8	13.145
		CL9	12.056
Revacularization_Biological replicate 2
Samples_PBS	Revascularized %	Samples_CL	Revascularized %
PBS1	19.762	CL1	11.565
PBS2	24.81	CL2	11.504
PBS3	13.449	CL3	24.072
PBS4	20.056	CL4	5.393
PBS5	16.566	CL5	9.456
PBS6	14.397	CL6	18.151

## Sheet: Figure 7A-statistic
Table Analyzed	Revascularization
Column B	-8d_CL
vs.	vs.
Column A	-8d_PBS
Unpaired t test
P value	0.0015
P value summary	**
Significantly different (P < 0.05)?	Yes
One- or two-tailed P value?	Two-tailed
t, df	t=3.556, df=26
How big is the difference?
Mean of column A	17.67
Mean of column B	11.92
Difference between means (B - A) ± SEM	-5.750 ± 1.617
95% confidence interval	-9.074 to -2.427
R squared (eta squared)	0.3272
F test to compare variances
F, DFn, Dfd	1.373, 14, 12
P value	0.5882
P value summary	ns
Significantly different (P < 0.05)?	No
Data analyzed
Sample size, column A	13
Sample size, column B	15

## Sheet: Figure 7B
Neutrophil retention
Samples_PBS and CL	Total number of neutrophils in injured area
PBS1	15
PBS2	36
PBS3	57
PBS4	44
PBS5	65
CL1	335
CL2	79
CL3	260
CL4	83
CL5	299

## Sheet: Figure 7B-statistic
Table Analyzed	7-dpci neutrophil retention
Column B	-8d_CL
vs.	vs.
Column A	-8d_PBS
Unpaired t test with Welch's correction
P value	0.0359
P value summary	*
Significantly different (P < 0.05)?	Yes
One- or two-tailed P value?	Two-tailed
Welch-corrected t, df	t=3.042, df=4.204
How big is the difference?
Mean of column A	43.4
Mean of column B	211.2
Difference between means (B - A) ± SEM	167.8 ± 55.16
95% confidence interval	17.55 to 318.1
R squared (eta squared)	0.6877
F test to compare variances
F, DFn, Dfd	39.21, 4, 4
P value	0.0036
P value summary	**
Significantly different (P < 0.05)?	Yes
Data analyzed
Sample size, column A	5
Sample size, column B	5

## Sheet: Figure 7C
CM proliferation and CM dnesity_Biological replicate 1				Quantification of injured area inboth PBS and CL hearts
Samples_PBS and CL	% Edu+ CM in averge	CM per 1000 um2 of the area of border zone		PBS (um2)	146162	CL (um2)	202698
PBS1	1.42746	4.01103			222244		201724
PBS2	2.16189	3.87958			108615		155053
PBS3	4.49386	3.72066			298327		310333
CL1	2.74882	2.2228			156043		229553
CL2	3.3919	1.49626			210448		284874
CL3	1.62884	2.70686			97478		348389
					304142		217929
CM proliferation and CM dnesity_Biological replicate 2					141533		219992
Samples_PBS and CL	% Edu+ CM in averge	CM per 1000 um2 of the area of border zone			121808		311641
PBS1	6.65289	3.08525			202083		308600
PBS2	3.47855	3.11656			356648		151578
PBS3	8.54713	2.4055			161467		218414
CL1	10.0387	2.93191			241468		186384
CL2	11.5511	2.32821			121248		286205
CL3	4.40119	3.13897			119924		140796
CL4	2.76159	1.97853			79280		416795
					183485		250199
					248163		186914
					214786		348311
					110094		266340
					253476		291594
					283698		104358
					141905		240854
					167159		561555

## Sheet: Figure 7C-statistic
Table Analyzed	CM proliferation index		Table Analyzed	CMs density		Table Analyzed	Injury area
Column B	-8d_CL		Column B	-8d_CL		Column B	-8d_CL
vs.	vs.		vs.	vs.		vs.	vs.
Column A	-8d_PBS		Column A	-8d_PBS		Column A	-8d_PBS
Unpaired t test			Unpaired t test			Unpaired t test
P value	0.699		P value	0.0131		P value	0.0061
P value summary	ns		P value summary	*		P value summary	**
Significantly different (P < 0.05)?	No		Significantly different (P < 0.05)?	Yes		Significantly different (P < 0.05)?	Yes
One- or two-tailed P value?	Two-tailed		One- or two-tailed P value?	Two-tailed		One- or two-tailed P value?	Two-tailed
t, df	t=0.3969, df=11		t, df	t=2.955, df=11		t, df	t=2.870, df=48
How big is the difference?			How big is the difference?			How big is the difference?
Mean of column A	4.46		Mean of column A	3.37		Mean of column A	187667
Mean of column B	5.217		Mean of column B	2.401		Mean of column B	257643
Difference between means (B - A) ± SEM	0.7572 ± 1.908		Difference between means (B - A) ± SEM	-0.9693 ± 0.3280		Difference between means (B - A) ± SEM	69976 ± 24383
95% confidence interval	-3.441 to 4.956		95% confidence interval	-1.691 to -0.2473		95% confidence interval	20951 to 119001
R squared (eta squared)	0.01412		R squared (eta squared)	0.4425		R squared (eta squared)	0.1465
F test to compare variances			F test to compare variances			F test to compare variances
F, DFn, Dfd	2.083, 6, 5		F, DFn, Dfd	1.148, 5, 6		F, DFn, Dfd	1.730, 24, 24
P value	0.4381		P value	0.8567		P value	0.1868
P value summary	ns		P value summary	ns		P value summary	ns
Significantly different (P < 0.05)?	No		Significantly different (P < 0.05)?	No		Significantly different (P < 0.05)?	No
Data analyzed			Data analyzed			Data analyzed
Sample size, column A	6		Sample size, column A	6		Sample size, column A	25
Sample size, column B	7		Sample size, column B	7		Sample size, column B	25

## Sheet: Figure 7D
TUNEL assay
Samples_PBS and CL	IntDen (ImageJ) in average (x104)
PBS1	1
PBS2	0.4
PBS3	0.02
PBS4	1.5
PBS5	2.1
CL1	5.1
CL2	0.5
CL3	36.2*	(The value was considered as a outlier by "Identify outliers" in Prism 9.)
CL4	3.1
CL5	5
CL6	9.4
CL7	9.6

## Sheet: Figure 7D-statistic
Table Analyzed	TUNEL intensity_injured area
Column B	-8d_CL
vs.	vs.
Column A	-8d_PBS
Unpaired t test with Welch's correction
P value	0.0269
P value summary	*
Significantly different (P < 0.05)?	Yes
One- or two-tailed P value?	Two-tailed
Welch-corrected t, df	t=2.967, df=5.651
How big is the difference?
Mean of column A	1.004
Mean of column B	5.45
Difference between means (B - A) ± SEM	4.446 ± 1.498
95% confidence interval	0.7243 to 8.168
R squared (eta squared)	0.6091
F test to compare variances
F, DFn, Dfd	18.18, 5, 4
P value	0.0149
P value summary	*
Significantly different (P < 0.05)?	Yes
Data analyzed
Sample size, column A	5
Sample size, column B	6

## Sheet: Figure 7E
Scar resolution
Samples_PBS and CL	scar area (um2)
PBS1	173577
PBS2	68351.1
PBS3	68683.8
PBS4	97694.1
PBS5	63144.5
CL1	228497
CL2	214500
CL3	227048
CL4	212857
CL5	186698

## Sheet: Figure 7E-statistic
Table Analyzed	Scar resolution_8 dpip 30 dpci
Column B	-8d_CL
vs.	vs.
Column A	-8d_PBS
Unpaired t test
P value	0.0006
P value summary	***
Significantly different (P < 0.05)?	Yes
One- or two-tailed P value?	Two-tailed
t, df	t=5.425, df=8
How big is the difference?
Mean of column A	94290
Mean of column B	213920
Difference between means (B - A) ± SEM	119630 ± 22050
95% confidence interval	68783 to 170477
R squared (eta squared)	0.7863
F test to compare variances
F, DFn, Dfd	7.626, 4, 4
P value	0.0744
P value summary	ns
Significantly different (P < 0.05)?	No
Data analyzed
Sample size, column A	5
Sample size, column B	5
