# Supplementary material for: Comparative single-cell profiling reveals distinct cardiac resident macrophages essential for zebrafish heart regeneration
Source: eLife. 2023 Jul 27;12:e84679. doi: 10.7554/eLife.84679 (PMC10411971; doi:10.7554/eLife.84679)
Supplement: Figure 7—source data 2. [file elife-84679-fig7-data2.xlsx]

## Sheet: Figure 7 suppl.1C
Experiment: -8d_PBS and -8d_CL uninjury FACS timp4.3 and hbaa1 expression Active filter: SYBR Green I / HRM Dye (465-510)
Sample Name	Targets	References	Target Mean Cp	Reference Mean Cp	Target/Reference	Target/Ref Error	Normalized
PBS	timp4.3	eef1a1l1	27.7482	21.671	0.0215	0.000592	1
CL	timp4.3	eef1a1l1	28.6386	18.5357	0.00124	5.77e-05	0.0576744
PBS	hbaa1	eef1a1l1	22.7001	21.671	0.3447	0.00742	1
CL	hbaa1	eef1a1l1	20.5853	18.5357	0.1717	0.00796	0.498114

## Sheet: Figure 7 suppl.1C-oligo lists
Gene	Forward Primer	Reverse Primer	Reference
hbaa1	AAGCCCTCGCCAGAATGC	ACCCATGATAGTCTTTCCGTGC	This paper
timp4.3	GCAGAGACGCGGAGGTGAAG	CGGGACCACAGCTACAAGCC	This paper
eef1a1l1	CTGGAGGCCAGCTCAAAC	ATCAAGAAGAGTAGTACCGCTAGCATTAC	Badrock et al., 2020; PMID: 32359472
