# Supplementary material for: Comparative single-cell profiling reveals distinct cardiac resident macrophages essential for zebrafish heart regeneration
Source: eLife. 2023 Jul 27;12:e84679. doi: 10.7554/eLife.84679 (PMC10411971; doi:10.7554/eLife.84679)
Supplement: Figure 7—source data 3. [file elife-84679-fig7-data3.xlsx]

## Sheet: Figure 7-suppl. 2A
Revacularization_-1mCL
Samples_PBS and CL	Revascularized %
PBS1	29.184
PBS2	22.208
PBS3	34.514
PBS4	25.148
PBS5	30.051
CL1	20.309
CL2	15.673
CL3	17.162
CL4	22.999
CL5	15.365
CL6	23.844
CL7	18.596

## Sheet: Figure 7-suppl. 2A-statistic
Table Analyzed	Revascularization_-1mCL
Column B	-1m CL
vs.	vs.
Column A	-1m PBS
Unpaired t test
P value	0.003
P value summary	**
Significantly different (P < 0.05)?	Yes
One- or two-tailed P value?	Two-tailed
t, df	t=3.899, df=10
How big is the difference?
Mean of column A	28.22
Mean of column B	19.14
Difference between means (B - A) ± SEM	-9.086 ± 2.330
95% confidence interval	-14.28 to -3.894
R squared (eta squared)	0.6033
F test to compare variances
F, DFn, Dfd	1.949, 4, 6
P value	0.4434
P value summary	ns
Significantly different (P < 0.05)?	No
Data analyzed
Sample size, column A	5
Sample size, column B	7

## Sheet: Figure 7-suppl. 2B
Neutrophil retention_-1mCL
Samples_PBS and CL	Total number of neutrophils in injured area
PBS1	195*	(The value was considered as a outlier by "Identify outliers" in Prism 9.)
PBS2	23
PBS3	52
PBS4	50
PBS5	82
PBS6	41
PBS7	36
CL1	265
CL2	37
CL3	27
CL4	207
CL5	31
CL6	183
CL7	194

## Sheet: Figure 7-suppl. 2B-statistic
Table Analyzed	neutrophil retention_-1mCL
Column B	-1m_CL
vs.	vs.
Column A	-1m_PBS
Unpaired t test with Welch's correction
P value	0.0605
P value summary	ns
Significantly different (P < 0.05)?	No
One- or two-tailed P value?	Two-tailed
Welch-corrected t, df	t=2.265, df=6.554
How big is the difference?
Mean of column A	47.33
Mean of column B	134.9
Difference between means (B - A) ± SEM	87.52 ± 38.65
95% confidence interval	-5.145 to 180.2
R squared (eta squared)	0.439
F test to compare variances
F, DFn, Dfd	25.09, 6, 5
P value	0.0028
P value summary	**
Significantly different (P < 0.05)?	Yes
Data analyzed
Sample size, column A	6
Sample size, column B	7

## Sheet: Figure 7-suppl. 2C
CM proliferation and CM dnesity_-1mCL
Samples_PBS and CL	% Edu+ CM in averge	CM per 1000 um2 of the area of border zone
PBS1	2.54371	3.21971
PBS2	2.91279	2.99195
PBS3	9.91586	3.25977
PBS4	3.7889	3.21915
PBS5	3.96284	2.90232
PBS6	4.74874	2.76158
CL1	7.49064	3.04121
CL2	5.44343	3.05244
CL3	2.56252	3.87387
CL4	6.69714	3.83616
CL5	2.36437	3.51143
CL6	1.70091	3.27718

## Sheet: Figure 7-suppl. 2C-statistic
Table Analyzed	CM proliferation_-1mCL		Table Analyzed	CMs density_-1mCL
Column B	-1m_CL		Column B	-1m_CL
vs.	vs.		vs.	vs.
Column A	-1m_PBS		Column A	-1m_PBS
Unpaired t test			Unpaired t test
P value	0.8609		P value	0.0562
P value summary	ns		P value summary	ns
Significantly different (P < 0.05)?	No		Significantly different (P < 0.05)?	No
One- or two-tailed P value?	Two-tailed		One- or two-tailed P value?	Two-tailed
t, df	t=0.1798, df=10		t, df	t=2.159, df=10
How big is the difference?			How big is the difference?
Mean of column A	4.645		Mean of column A	3.059
Mean of column B	4.377		Mean of column B	3.432
Difference between means (B - A) ± SEM	-0.2690 ± 1.496		Difference between means (B - A) ± SEM	0.3730 ± 0.1727
95% confidence interval	-3.602 to 3.064		95% confidence interval	-0.01187 to 0.7578
R squared (eta squared)	0.003223		R squared (eta squared)	0.318
F test to compare variances			F test to compare variances
F, DFn, Dfd	1.185, 5, 5		F, DFn, Dfd	3.276, 5, 5
P value	0.8567		P value	0.2187
P value summary	ns		P value summary	ns
Significantly different (P < 0.05)?	No		Significantly different (P < 0.05)?	No
Data analyzed			Data analyzed
Sample size, column A	6		Sample size, column A	6
Sample size, column B	6		Sample size, column B	6

## Sheet: Figure 7-suppl. 2D
Scar resolution_-1mCL
Samples_PBS and CL	scar area (um2)
PBS1	20422.5
PBS2	28333.3
PBS3	39453.5
PBS4	46643.5
PBS5	42161.3
PBS6	22727.2
CL1	93743.2
CL2	209916
CL3	91107.4
CL4	203754
CL5	81101.3

## Sheet: Figure 7-suppl. 2D-statistic
Table Analyzed	Scar resolution_-1mCL
Column B	-1m_CL
vs.	vs.
Column A	-1m_PBS
Unpaired t test with Welch's correction
P value	0.0232
P value summary	*
Significantly different (P < 0.05)?	Yes
One- or two-tailed P value?	Two-tailed
Welch-corrected t, df	t=3.493, df=4.189
How big is the difference?
Mean of column A	33290
Mean of column B	135925
Difference between means (B - A) ± SEM	102634 ± 29383
95% confidence interval	22486 to 182783
R squared (eta squared)	0.7444
F test to compare variances
F, DFn, Dfd	35.34, 4, 5
P value	0.0015
P value summary	**
Significantly different (P < 0.05)?	Yes
Data analyzed
Sample size, column A	6
Sample size, column B	5
