# Supplementary material for: Comparative single-cell profiling reveals distinct cardiac resident macrophages essential for zebrafish heart regeneration
Source: eLife. 2023 Jul 27;12:e84679. doi: 10.7554/eLife.84679 (PMC10411971; doi:10.7554/eLife.84679)
Supplement: Figure 8—source data 1. [file elife-84679-fig8-data1.xlsx]

## Sheet: Figure 8C
Biological replicate 1
Samples_PBS	% of Hmox1+/mpeg1:mCherry+ cells in injured area	Samples_CL	% of Hmox1+/mpeg1:mCherry+ cells in injured area
	12.9131		6.59664
	19.7312		6.91756
	21.3159		1.92412
	21.1539		2.48777
	14.66		6.81018
			5.79284
			2.43062
Biological replicate 1
Samples_PBS	Total mpeg1:mCherry+ cells in injured area	Samples_CL	Total mpeg1:mCherry+ cells in injured area
	625		298
	767.333		477.333
	452.333		464
	526.333		530.667
	209		422.667
			507
			673

## Sheet: Figure 8C-statistic
Table Analyzed	% of Hmox1+/mpeg1:mCherry+ cells in injured area_7dpci		Table Analyzed	Total mpeg1:mCherry+ cells in injured area_7 dpci
Column B	-8d_CL		Column B	-8d_CL
vs.	vs.		vs.	vs.
Column A	-8d_PBS		Column A	-8d_PBS
Unpaired t test			Unpaired t test
P value	<0.0001		P value	0.72
P value summary	****		P value summary	ns
Significantly different (P < 0.05)?	Yes		Significantly different (P < 0.05)?	No
One- or two-tailed P value?	Two-tailed		One- or two-tailed P value?	Two-tailed
t, df	t=7.423, df=10		t, df	t=0.3688, df=10
How big is the difference?			How big is the difference?
Mean of column A	17.95		Mean of column A	516
Mean of column B	4.709		Mean of column B	481.8
Difference between means (B - A) ± SEM	-13.25 ± 1.784		Difference between means (B - A) ± SEM	-34.19 ± 92.70
95% confidence interval	-17.22 to -9.270		95% confidence interval	-240.7 to 172.4
R squared (eta squared)	0.8464		R squared (eta squared)	0.01342
F test to compare variances			F test to compare variances
F, DFn, Dfd	2.866, 4, 6		F, DFn, Dfd	3.370, 4, 6
P value	0.2409		P value	0.1797
P value summary	ns		P value summary	ns
Significantly different (P < 0.05)?	No		Significantly different (P < 0.05)?	No
Data analyzed			Data analyzed
Sample size, column A	5		Sample size, column A	5
Sample size, column B	7		Sample size, column B	7

## Sheet: Figure 8D
Biological replicate 1
Samples_PBS	Heme accumulation (%)	Samples_CL	Heme accumulation (%)
	0.683		30.039
	0.262		45.227
	0.092		25.256
	0.098		0.385
	2.659		16.089
	12.395		7.45
	5.086		24.946
	0.041

## Sheet: Figure 8D-statistic
Table Analyzed	O-dianisidine stain
Column B	-8d_CL
vs.	vs.
Column A	-8d_PBS
Unpaired t test with Welch's correction
P value	0.0155
P value summary	*
Significantly different (P < 0.05)?	Yes
One- or two-tailed P value?	Two-tailed
Welch-corrected t, df	t=3.199, df=6.880
How big is the difference?
Mean of column A	2.665
Mean of column B	21.34
Difference between means (B - A) ± SEM	18.68 ± 5.839
95% confidence interval	4.821 to 32.53
R squared (eta squared)	0.5979
F test to compare variances
F, DFn, Dfd	11.94, 6, 7
P value	0.0045
P value summary	**
Significantly different (P < 0.05)?	Yes
Data analyzed
Sample size, column A	8
Sample size, column B	7
